# Supplementary material for: Kelpie: generating full-length ‘amplicons’ from whole-metagenome datasets
Source: PeerJ. 2019 Jan 30;6:e6174. doi: 10.7717/peerj.6174 (PMC6359901; doi:10.7717/peerj.6174)
Supplement: Table S1 — Excel spreadsheet containing EBI-generated profile for ERP008951, Kelpie profiles generated from the EBI-filtered ’16S’ reads, and comparisons at Class and Order levels. [file peerj-07-6174-s001.xlsx]

## Sheet: EBI tsv
ERP008951_taxonomy_abundances_v2.0.tsv									24964	28369	28496	32288	31317	30685	49923	48214	23086	21772	46403	44862	32258	30582	9361	9217	22516	21725	28223	27145	32583	31501	28360	27238	35648	34705	75668	73030	15187	15310	22520	23107	44878	45379	23980	23791	19445	19324	31762	32074
EBI-provided taxonomic profile
#SampleID	Kingdom	Phylum	Class	Order	Family	Genus	Species	Sum	ERR695598	ERR695599	ERR695600	ERR695601	ERR695602	ERR695603	ERR695604	ERR695605	ERR695606	ERR695607	ERR695608	ERR695609	ERR695610	ERR695611	ERR695612	ERR695613	ERR695614	ERR695615	ERR695616	ERR695617	ERR695618	ERR695619	ERR695620	ERR695621	ERR695622	ERR695623	ERR695624	ERR695625	ERR695626	ERR695627	ERR695628	ERR695629	ERR695630	ERR695631	ERR695632	ERR695633	ERR695634	ERR695635	ERR695636	ERR695637
Root								96675	1646	1824	2189	2467	1897	1959	2688	2708	1422	1371	2909	2893	2315	2216	502	531	1589	1527	1998	1929	2325	2435	5677	5612	2446	2497	3936	4028	3016	2920	1787	1799	3635	3620	1611	1652	1750	1716	2827	2806
Root	k__Bacteria	p__Bacteroidetes	c__Bacteroidia	o__Bacteroidales	f__Bacteroidaceae	g__Bacteroides	s__	242238	6056	6901	3766	4118	8459	8062	8374	8206	4959	4733	14832	14422	3417	3274	224	211	2716	2705	3383	3239	15674	15236	2662	2404	17400	16941	13402	12977	1244	1181	2813	3025	4211	4509	2496	2392	2157	2213	3598	3646
Root	k__Bacteria	p__Firmicutes	c__Clostridia	o__Clostridiales	f__Lachnospiraceae	g__	s__	100484	2335	2697	4669	5410	2413	2459	7423	7036	2077	1874	3347	3171	2303	2158	1114	1181	1653	1553	2190	2066	803	844	1228	1253	911	863	3676	3548	625	658	1959	1998	5766	5827	2270	2111	1464	1455	2078	2018
Root	k__Bacteria	p__Bacteroidetes	c__Bacteroidia	o__Bacteroidales	f__Prevotellaceae	g__Prevotella	s__copri	86982	197	215	290	301	152	127	1208	1172	1235	1168	1808	1722	3008	2964	422	430	3024	2924	3797	3682	4363	4033	351	363	4872	4595	2732	2594	111	114	505	495	5386	5519	3518	3696	135	127	6791	6836
Root	k__Bacteria	p__Firmicutes	c__Clostridia	o__Clostridiales	f__Ruminococcaceae	g__Faecalibacterium	s__prausnitzii	70676	1942	2135	1946	2304	3022	2869	4649	4376	1315	1107	1962	1799	1580	1517	600	490	1950	1833	2495	2345	7	8	166	143	14	6	6497	6244	64	67	2098	2231	2179	2236	1041	1061	1020	917	1247	1194
Root	k__Bacteria	p__Firmicutes	c__Clostridia	o__Clostridiales	f__Ruminococcaceae	g__	s__	68736	1820	2124	2765	3098	1593	1577	2400	2360	1578	1588	2995	2851	3197	3072	1234	1106	1741	1729	2058	2073	130	117	2750	2550	154	122	1481	1424	970	912	2214	2375	1561	1477	2146	2132	682	719	911	950
Root	k__Bacteria	p__Firmicutes	c__Clostridia	o__Clostridiales	f__	g__	s__	67346	1599	1753	2953	3349	1567	1560	2443	2379	1451	1411	2264	2251	1909	1670	788	802	1183	1212	1439	1460	210	200	4811	4591	222	228	1954	1923	2585	2612	1132	1004	2254	2203	1379	1356	987	939	658	655
Root	k__Bacteria	p__Firmicutes	c__Clostridia	o__Clostridiales	f__Lachnospiraceae	g__Lachnospira	s__	38338	1169	1247	577	662	2014	1888	3073	2906	692	670	1824	1824	1554	1449	483	492	645	599	707	703	344	311	52	59	394	327	928	971	51	51	198	204	1632	1599	920	885	915	939	1183	1197
Root	k__Bacteria	p__Proteobacteria	c__Gammaproteobacteria	o__Enterobacteriales	f__Enterobacteriaceae	g__	s__	30687	4	8	13	21	4	7	3	1	11	4	3	2	6	5	6	20	13	28	18	18	2	8	227	247	6	10	15033	14275	154	150	44	49	41	52	11	11	63	47	35	27
Root	k__Bacteria	p__Bacteroidetes	c__Bacteroidia	o__Bacteroidales	f__Bacteroidaceae	g__Bacteroides	s__uniformis	24942	1166	1276	318	366	1630	1709	1034	1041	286	216	586	551	288	279	12	13	309	303	329	329	842	783	985	991	916	884	1814	1709	744	822	552	560	185	183	319	265	138	162	22	25
Root	k__Bacteria	p__Firmicutes	c__Clostridia	o__Clostridiales	f__Lachnospiraceae	g__Blautia	s__	24770	388	473	673	821	490	514	1573	1564	286	274	1015	990	250	247	607	646	336	364	462	455	262	223	142	139	219	240	813	699	43	39	438	487	2253	2263	924	893	414	409	677	765
Root	k__Bacteria	p__Proteobacteria	c__Betaproteobacteria	o__Burkholderiales	f__Alcaligenaceae	g__Sutterella	s__	24151	396	460	335	374	440	489	1467	1464	716	627	928	952	158	164	16	6	182	156	196	205	1996	1905	145	122	2070	2057	392	340	29	41	349	429	624	688	197	216	890	926	524	480
Root	k__Bacteria	p__Bacteroidetes	c__Bacteroidia	o__Bacteroidales	f__Porphyromonadaceae	g__Parabacteroides	s__	23702	423	546	245	250	912	840	625	565	204	196	587	557	280	273	12	6	217	218	247	265	945	981	966	988	1029	1049	474	448	782	796	259	278	225	241	80	75	3192	2989	211	226
Root	k__Bacteria	p__Firmicutes	c__Clostridia	o__Clostridiales	f__Lachnospiraceae	g__Coprococcus	s__	21015	425	474	551	539	635	578	1358	1326	335	325	755	696	745	665	380	359	448	440	554	574	132	126	336	307	129	125	636	526	147	125	447	426	1438	1423	594	582	279	300	392	383
Root	k__Bacteria	p__Firmicutes	c__Clostridia	o__Clostridiales	f__Ruminococcaceae	g__Ruminococcus	s__	20449	482	611	1577	1714	316	300	338	332	1092	1063	1028	1013	798	787	199	182	826	751	1082	936	40	46	475	509	54	58	99	84	267	309	536	540	245	240	386	345	181	192	213	203
Root	k__Bacteria	p__Bacteroidetes	c__Bacteroidia	o__Bacteroidales	f__Prevotellaceae	g__Prevotella	s__	15063	40	55	51	65	58	62	70	78	114	108	128	98	646	656	43	65	648	649	776	729	122	131	58	39	142	152	101	123	47	50	29	36	1719	1656	478	436	30	27	2247	2301
Root	k__Bacteria	p__Firmicutes	c__Clostridia	o__Clostridiales	f__Lachnospiraceae	g__Roseburia	s__	13965	146	172	140	172	139	177	1386	1302	354	337	444	459	188	176	255	268	118	127	155	147	81	70	27	19	85	68	1433	1513	17	15	232	217	799	885	376	401	401	393	147	124
Root	k__Bacteria	p__Bacteroidetes	c__Bacteroidia	o__Bacteroidales	f__Porphyromonadaceae	g__Parabacteroides	s__distasonis	13588	51	67	113	139	49	47	623	606	124	97	206	241	96	77	5	4	130	131	127	161	1707	1594	337	339	1739	1736	1040	1121	213	209	99	103	42	25	11	11	72	87	6	3
Root	k__Bacteria	p__Bacteroidetes	c__Bacteroidia	o__Bacteroidales	f__Rikenellaceae	g__	s__	13216	393	465	442	430	464	459	161	168	358	362	551	554	347	352	12	10	379	352	490	431	5	2	1136	1129	6	15	127	149	895	1002	432	383	99	85	131	97	166	161	7	9
Root	k__Bacteria	p__Firmicutes	c__Clostridia	o__Clostridiales	f__Ruminococcaceae	g__Oscillospira	s__	12402	283	368	184	247	424	376	444	449	154	153	705	639	595	532	134	128	351	304	379	390	16	14	936	875	15	21	232	200	399	377	273	279	201	194	236	251	157	186	146	155
Root	k__Bacteria	p__Firmicutes	c__Clostridia	o__Clostridiales	f__Veillonellaceae	g__Dialister	s__	11469	177	188	45	46	315	284	152	139	85	80	66	87	1181	1192	357	330	560	497	851	769	174	160	44	46	165	185	120	107	8	17	442	432	126	146	675	681	179	200	83	78
Root	k__Bacteria	p__Firmicutes	c__Clostridia	o__Clostridiales	f__Veillonellaceae	g__Megamonas	s__	9059	0	0	0	0	0	1	0	0	191	177	857	811	10	14	290	251	28	22	16	27	0	0	0	0	0	0	0	0	4	15	11	6	1229	1165	433	487	31	13	1436	1534
Root	k__Bacteria	p__Proteobacteria	c__Gammaproteobacteria	o__Enterobacteriales	f__Enterobacteriaceae	g__Klebsiella	s__	9045	0	1	1	0	1	1	0	0	1	0	2	2	3	4	0	0	1	3	0	1	0	0	2	4	1	1	4603	4382	6	9	4	6	3	2	1	0	0	0	0	0
Root	k__Bacteria	p__Firmicutes	c__Clostridia	o__Clostridiales	f__Lachnospiraceae	g__Dorea	s__	8362	137	171	311	345	133	153	760	653	151	155	259	208	163	109	103	102	132	120	202	171	82	79	153	189	97	76	128	128	66	48	227	259	661	637	172	185	111	139	185	202
Root	k__Bacteria	p__Bacteroidetes	c__Bacteroidia	o__Bacteroidales	f__Bacteroidaceae	g__Bacteroides	s__ovatus	7631	329	333	115	150	509	498	103	112	246	233	393	436	114	95	2	4	87	83	105	100	384	393	62	46	405	397	276	241	39	26	113	146	223	204	56	45	68	74	184	202
Root	k__Bacteria	p__Bacteroidetes	c__Bacteroidia	o__Bacteroidales	f__[Paraprevotellaceae]	g__Paraprevotella	s__	7437	39	60	64	59	36	41	18	23	72	62	185	166	2005	1997	24	20	318	321	411	369	82	79	46	45	110	80	81	84	34	20	14	17	69	67	81	98	8	8	59	65
Root	k__Bacteria	p__Bacteroidetes	c__Bacteroidia	o__Bacteroidales	f__	g__	s__	6677	39	59	44	41	56	58	30	22	55	68	78	61	1022	915	15	17	487	498	704	598	36	32	53	76	34	37	59	51	67	61	169	135	117	119	159	182	61	75	154	133
Root	k__Bacteria	p__Firmicutes	c__Clostridia	o__Clostridiales	f__Veillonellaceae	g__Phascolarctobacterium	s__	6407	166	197	105	137	29	31	1754	1780	101	95	202	227	4	7	77	72	12	9	6	6	0	1	2	0	2	0	420	391	2	0	1	2	2	1	284	240	22	17	2	1
Root	k__Bacteria	p__Firmicutes	c__Clostridia	o__Clostridiales	f__Lachnospiraceae	g__[Ruminococcus]	s__gnavus	5875	79	103	120	148	140	129	580	464	128	112	221	170	90	90	67	83	84	96	121	125	44	39	132	110	55	46	211	207	42	52	104	112	410	471	133	119	112	104	105	117
Root	k__Bacteria	p__Firmicutes	c__Erysipelotrichi	o__Erysipelotrichales	f__Erysipelotrichaceae	g__	s__	5834	206	225	166	192	296	297	68	63	294	261	216	214	82	83	77	63	91	96	117	159	2	5	16	5	8	5	166	148	4	7	34	25	650	698	125	105	32	37	247	249
Root	k__Bacteria	p__Bacteroidetes	c__Bacteroidia	o__Bacteroidales	f__[Paraprevotellaceae]	g__[Prevotella]	s__	5626	93	115	181	177	43	43	34	33	9	11	43	34	80	81	11	10	61	40	64	82	10	15	2	4	13	12	10	18	6	12	5	9	940	894	87	81	15	6	1116	1126
Root	k__Bacteria	p__Bacteroidetes	c__Bacteroidia	o__Bacteroidales	f__[Barnesiellaceae]	g__	s__	5548	197	231	326	373	180	218	204	183	99	126	306	298	256	275	1	1	224	227	270	265	11	12	46	72	12	14	53	50	58	60	373	371	30	55	19	25	11	13	3	0
Root	k__Bacteria	p__Bacteroidetes	c__Bacteroidia	o__Bacteroidales	f__Prevotellaceae	g__Prevotella	s__stercorea	5332	23	22	20	26	29	39	5	5	27	29	35	31	18	15	0	0	13	5	9	11	0	0	27	22	0	1	0	0	15	17	33	25	1063	1028	13	16	10	12	1365	1323
Root	k__Bacteria	p__Firmicutes	c__Clostridia	o__Clostridiales	f__Clostridiaceae	g__Clostridium	s__	4873	92	109	112	142	94	100	299	344	171	161	116	108	173	159	47	54	85	66	105	101	10	7	104	112	6	9	231	193	48	46	115	123	231	203	87	115	81	106	194	214
Root	k__Bacteria	p__Bacteroidetes	c__Bacteroidia	o__Bacteroidales	f__[Odoribacteraceae]	g__Odoribacter	s__	4705	79	91	60	55	121	100	24	33	115	106	179	207	55	43	1	2	31	23	21	33	0	3	679	674	7	1	248	227	499	523	100	67	51	46	11	11	103	75	0	1
Root	k__Bacteria	p__Firmicutes	c__Erysipelotrichi	o__Erysipelotrichales	f__Erysipelotrichaceae	g__[Eubacterium]	s__biforme	4533	42	65	217	250	20	33	7	5	2	1	0	1	414	360	4	3	205	189	244	222	0	0	1	0	0	1	4	4	0	0	348	336	488	527	10	24	5	4	231	266
Root	k__Bacteria	p__Firmicutes	c__Clostridia	o__Clostridiales	f__Clostridiaceae	g__SMB53	s__	4240	110	144	95	79	130	145	195	221	50	52	123	104	133	132	74	65	56	48	74	64	95	88	57	61	90	73	182	174	21	22	189	142	191	159	142	188	13	10	124	125
Root	k__Bacteria	p__Proteobacteria	c__Alphaproteobacteria	o__RF32	f__	g__	s__	3969	136	145	357	432	104	149	17	16	500	465	413	373	37	23	1	1	0	0	0	0	0	0	225	202	0	3	0	0	140	116	3	5	16	7	9	6	30	36	0	2
Root	k__Bacteria	p__Firmicutes	c__Clostridia	o__Clostridiales	f__Clostridiaceae	g__	s__	3588	62	82	39	53	79	84	322	279	44	52	61	50	83	60	43	41	40	37	35	45	49	50	154	148	57	58	131	120	93	84	110	82	215	208	86	85	37	37	93	100
Root	k__Bacteria	p__Firmicutes	c__Clostridia	o__Clostridiales	f__Lachnospiraceae	g__Anaerostipes	s__	3529	147	176	197	238	251	250	258	274	99	87	162	148	49	42	24	24	33	33	36	39	3	8	74	56	10	9	32	27	31	20	106	123	126	113	42	32	20	29	43	58
Root	k__Bacteria	p__Firmicutes	c__Bacilli	o__Lactobacillales	f__Streptococcaceae	g__Streptococcus	s__	3478	91	99	23	36	29	22	27	18	25	11	25	23	39	32	97	93	97	71	121	114	7	10	25	33	7	6	247	260	2	3	159	140	392	397	139	147	50	62	140	159
Root	k__Bacteria	p__Bacteroidetes	c__Bacteroidia	o__Bacteroidales	f__S24-7	g__	s__	3320	64	79	39	44	93	84	46	54	35	42	81	58	41	29	1	0	20	26	32	28	92	85	378	314	131	102	88	60	173	160	36	50	142	157	15	12	56	62	158	153
Root	k__Bacteria	p__Actinobacteria	c__Actinobacteria	o__Bifidobacteriales	f__Bifidobacteriaceae	g__Bifidobacterium	s__	3133	13	21	29	30	24	17	31	25	41	41	57	65	40	51	23	30	76	79	106	92	0	0	4	2	1	2	60	72	2	3	301	358	79	66	31	35	598	567	30	31
Root	k__Bacteria	p__Firmicutes	c__Clostridia	o__Clostridiales	f__Lachnospiraceae	g__Blautia	s__producta	2823	37	42	52	69	40	42	239	208	23	22	74	71	31	18	45	62	44	23	37	32	33	34	22	14	45	34	85	87	3	4	34	32	353	398	91	82	34	45	88	94
Root	k__Bacteria	p__Bacteroidetes	c__Bacteroidia	o__Bacteroidales	f__Porphyromonadaceae	g__Dysgonomonas	s__	2757	50	40	22	11	55	61	77	76	49	46	75	63	35	49	2	3	19	17	22	27	353	316	40	25	372	345	136	130	6	7	18	26	31	29	13	9	19	10	39	34
Root	k__Bacteria	p__Firmicutes	c__Clostridia	o__Clostridiales	f__Lachnospiraceae	g__Roseburia	s__faecis	2645	34	42	145	144	26	18	81	75	155	147	186	180	20	20	3	8	7	15	17	19	7	6	1	0	7	4	424	402	0	1	38	33	45	82	15	16	72	71	39	40
Root	k__Bacteria	p__Firmicutes	c__Clostridia	o__Clostridiales	f__Veillonellaceae	g__Megasphaera	s__	2626	1	0	2	2	3	2	11	8	59	64	161	136	17	10	18	23	10	6	6	15	2	5	1	2	2	1	10	14	2	0	9	6	23	23	68	71	888	878	26	41
Root	k__Bacteria	p__Actinobacteria	c__Actinobacteria	o__Bifidobacteriales	f__Bifidobacteriaceae	g__Bifidobacterium	s__adolescentis	2542	18	17	34	50	17	30	0	1	117	105	139	102	45	26	8	8	80	73	114	101	0	0	1	0	0	0	9	9	3	1	504	538	92	64	23	21	93	68	14	17
Root	k__Bacteria	p__Bacteroidetes	c__Bacteroidia	o__Bacteroidales	f__[Odoribacteraceae]	g__Butyricimonas	s__	2462	11	18	30	49	17	15	26	35	184	171	492	479	58	45	9	3	51	47	77	68	3	4	71	80	4	4	67	52	45	53	48	56	16	24	3	6	15	14	2	10
Root	k__Bacteria	p__Firmicutes	c__Clostridia	o__Clostridiales	f__Christensenellaceae	g__	s__	2450	34	38	67	81	12	17	11	7	50	30	114	95	144	132	18	29	24	25	26	12	0	4	313	275	6	3	1	0	142	173	26	13	85	86	46	73	35	30	88	85
Root	k__Bacteria	p__Bacteroidetes	c__Bacteroidia	o__Bacteroidales	f__Prevotellaceae	g__Prevotella	s__melaninogenica	2328	3	5	2	3	4	3	6	3	45	34	34	26	143	136	18	23	129	127	162	147	10	16	6	2	9	11	17	12	3	3	3	1	180	218	131	137	5	6	242	263
Root	k__Bacteria	p__Firmicutes	c__Clostridia	o__Clostridiales	f__Lachnospiraceae	g__Coprococcus	s__eutactus	2306	6	19	1	4	1	2	8	14	27	37	106	104	764	732	40	38	41	37	39	42	0	0	2	6	0	1	27	27	2	2	2	0	4	5	75	77	4	3	3	4
Root	k__Bacteria	p__Actinobacteria	c__Coriobacteriia	o__Coriobacteriales	f__Coriobacteriaceae	g__Collinsella	s__aerofaciens	2302	11	16	64	82	19	12	367	363	31	37	85	66	58	37	43	42	76	68	90	90	10	14	6	5	13	20	1	2	2	3	161	140	49	40	61	39	2	3	37	37
Root	k__Bacteria	p__Proteobacteria	c__Gammaproteobacteria	o__Enterobacteriales	f__Enterobacteriaceae	g__Citrobacter	s__	2049	0	0	0	0	0	0	1	0	0	0	0	0	0	0	0	0	1	0	2	0	0	0	10	5	1	0	1017	991	3	4	3	1	4	2	0	0	1	0	1	2
Root	k__Bacteria	p__Firmicutes	c__Clostridia	o__Clostridiales	f__Lachnospiraceae	g__Lachnospira	s__pectinoschiza	2004	82	95	36	29	154	150	129	90	25	21	73	86	77	83	27	26	34	31	27	32	7	6	2	2	5	5	61	62	3	2	0	4	112	119	38	63	20	20	93	73
Root	k__Bacteria	p__Actinobacteria	c__Actinobacteria	o__Bifidobacteriales	f__Bifidobacteriaceae	g__Bifidobacterium	s__longum	1968	28	26	46	38	22	29	63	70	41	23	41	26	15	13	6	8	21	13	28	24	0	0	7	2	0	0	77	64	2	0	237	259	97	108	15	15	212	215	35	42
Root	k__Bacteria	p__Proteobacteria	c__Gammaproteobacteria	o__Enterobacteriales	f__Enterobacteriaceae	g__Klebsiella	s__oxytoca	1903	0	0	1	0	2	0	0	0	1	0	1	0	0	0	1	0	0	0	0	0	0	0	0	1	0	0	988	895	3	3	1	3	0	1	0	1	0	0	1	0
Root	k__Bacteria	p__Proteobacteria	c__Gammaproteobacteria	o__Enterobacteriales	f__Enterobacteriaceae	g__Hafnia	s__alvei	1853	0	0	0	0	0	0	0	0	1	0	2	0	0	0	0	0	1	0	0	0	0	0	22	8	0	1	858	937	5	6	4	2	1	1	0	0	1	2	0	1
Root	k__Bacteria	p__Proteobacteria	c__Gammaproteobacteria	o__Enterobacteriales	f__Enterobacteriaceae	g__Serratia	s__	1711	0	0	0	1	0	1	0	0	0	0	0	0	0	0	0	0	0	0	0	0	0	0	8	8	0	0	827	850	6	4	3	0	3	0	0	0	0	0	0	0
Root	k__Bacteria	p__Proteobacteria	c__Gammaproteobacteria	o__Aeromonadales	f__Aeromonadaceae	g__	s__	1590	0	0	1	0	0	0	0	0	0	1	0	0	0	0	1	0	1	0	0	0	0	1	0	2	0	2	782	794	1	2	0	2	0	0	0	0	0	0	0	0
Root	k__Bacteria	p__Bacteroidetes	c__Bacteroidia	o__Bacteroidales	f__Bacteroidaceae	g__Bacteroides	s__eggerthii	1568	79	96	19	25	154	138	290	283	14	8	34	36	36	25	1	0	25	23	34	43	1	1	9	10	1	1	36	37	4	3	19	21	28	25	2	5	0	1	1	0
Root	k__Bacteria	p__Proteobacteria	c__Deltaproteobacteria	o__Desulfovibrionales	f__Desulfovibrionaceae	g__Bilophila	s__	1561	71	80	66	72	122	115	204	174	22	19	96	114	7	5	0	0	8	5	11	7	0	0	77	59	0	2	0	0	50	50	49	32	10	3	8	14	5	4	0	0
Root	k__Bacteria	p__Bacteroidetes	c__Bacteroidia	o__Bacteroidales	f__Bacteroidaceae	g__Bacteroides	s__caccae	1538	17	20	32	31	16	22	13	22	68	75	126	129	82	67	2	0	71	68	69	63	29	11	83	62	28	21	14	8	58	43	54	53	17	22	5	10	7	4	11	5
Root	k__Bacteria	p__Bacteroidetes	c__Bacteroidia	o__Bacteroidales	f__Bacteroidaceae	g__Bacteroides	s__coprophilus	1516	98	83	280	356	51	43	7	5	0	0	0	5	0	0	45	59	8	5	7	5	0	0	0	0	1	5	0	1	0	0	0	0	1	0	228	210	4	9	0	0
Root	k__Bacteria	p__Cyanobacteria	c__4C0d-2	o__YS2	f__	g__	s__	1507	100	108	229	273	68	69	11	10	0	0	0	0	0	0	1	0	0	1	0	0	0	0	158	160	0	2	0	0	129	106	3	4	7	18	1	1	16	31	0	1
Root	k__Bacteria	p__Firmicutes	c__Clostridia	o__Clostridiales	f__Peptostreptococcaceae	g__	s__	1504	28	30	30	24	38	31	47	48	13	10	11	8	0	1	23	28	6	5	11	14	57	41	38	39	51	41	143	115	10	10	85	73	70	84	74	67	10	11	38	41
Root	k__Bacteria	p__Verrucomicrobia	c__Verrucomicrobiae	o__Verrucomicrobiales	f__Verrucomicrobiaceae	g__Akkermansia	s__muciniphila	1485	24	23	42	64	9	10	6	2	9	8	35	19	0	2	7	0	4	7	6	7	0	0	469	381	0	3	0	2	110	113	6	2	12	13	13	12	29	36	0	0
Root	k__Bacteria	p__Firmicutes	c__Erysipelotrichi	o__Erysipelotrichales	f__Erysipelotrichaceae	g__Catenibacterium	s__	1449	0	0	1	2	0	0	0	0	1	0	0	1	0	0	0	0	0	0	0	0	0	0	0	0	0	0	1	1	4	1	218	242	227	209	4	5	2	2	242	286
Root	k__Bacteria	p__Firmicutes	c__Clostridia	o__Clostridiales	f__Veillonellaceae	g__	s__	1429	40	59	84	86	17	17	108	121	19	31	67	62	14	7	18	11	13	7	6	16	34	36	12	8	40	45	42	45	3	1	5	9	49	40	37	29	45	45	45	56
Root	k__Bacteria	p__Proteobacteria	c__Gammaproteobacteria	o__Enterobacteriales	f__Enterobacteriaceae	g__Erwinia	s__	1400	1	0	0	0	1	0	0	0	1	0	0	1	1	0	1	0	1	1	0	0	0	1	0	5	1	0	728	645	0	1	2	3	2	0	1	0	0	2	0	1
Root	k__Bacteria	p__Bacteroidetes	c__Bacteroidia	o__Bacteroidales	f__Porphyromonadaceae	g__	s__	1390	27	18	8	6	47	45	21	17	19	18	17	25	10	8	0	0	6	4	5	5	18	16	78	85	17	22	33	29	50	64	16	16	13	8	3	5	277	315	12	7
Root	k__Bacteria	p__Firmicutes	c__Clostridia	o__Clostridiales	f__Lachnospiraceae	g__Dorea	s__formicigenerans	1381	26	28	34	43	34	39	115	85	25	35	55	49	28	18	21	28	29	45	43	55	2	2	8	2	4	1	6	3	0	1	53	36	114	138	22	23	13	16	56	46
Root	k__Bacteria	p__Firmicutes	c__Clostridia	o__Clostridiales	f__Lachnospiraceae	g__[Ruminococcus]	s__	1374	26	16	30	31	25	21	206	171	35	31	40	49	21	11	17	22	24	24	28	29	5	8	20	24	3	11	51	55	7	3	21	20	56	68	29	29	28	26	24	29
Root	k__Bacteria	p__Firmicutes	c__Clostridia	o__Clostridiales	f__Veillonellaceae	g__Veillonella	s__	1358	2	3	2	2	2	1	8	5	5	3	8	4	4	7	0	2	1	1	6	4	238	257	22	9	289	290	65	74	2	0	4	6	0	1	6	2	7	11	2	3
Root	k__Bacteria	p__Bacteroidetes	c__Bacteroidia	o__Bacteroidales	f__Bacteroidaceae	g__5-7N15	s__	1242	52	68	31	40	93	87	54	55	31	28	109	108	24	27	1	2	20	12	34	20	30	21	10	6	26	31	59	50	8	2	7	10	12	19	12	15	5	2	11	10
Root	k__Bacteria	p__Actinobacteria	c__Coriobacteriia	o__Coriobacteriales	f__Coriobacteriaceae	g__	s__	1190	14	7	26	39	12	11	83	94	38	46	52	57	41	32	14	9	43	52	90	83	3	2	29	13	4	2	16	9	3	3	72	70	22	29	18	19	6	1	14	12
Root	k__Bacteria	p__Bacteroidetes	c__Bacteroidia	o__Bacteroidales	f__Bacteroidaceae	g__Bacteroides	s__fragilis	1163	76	86	11	12	113	103	151	138	3	2	9	5	3	6	1	0	0	2	1	5	14	19	18	20	17	19	21	17	13	13	52	59	26	24	15	17	30	41	0	1
Root	k__Bacteria	p__Tenericutes	c__Mollicutes	o__RF39	f__	g__	s__	1081	33	23	0	1	13	7	0	0	3	3	0	4	156	162	1	4	2	3	1	0	2	0	173	202	2	0	0	0	87	115	5	2	6	16	8	14	18	14	1	0
Root	k__Bacteria	p__Firmicutes	c__Clostridia	o__Clostridiales	f__Veillonellaceae	g__Pectinatus	s__	971	0	0	0	0	0	0	1	1	26	18	98	88	2	1	54	31	8	6	5	5	0	0	0	0	0	0	2	1	0	3	0	1	106	101	50	59	8	5	125	166
Root	k__Bacteria	p__Firmicutes	c__Clostridia	o__Clostridiales	f__Ruminococcaceae	g__Ruminococcus	s__flavefaciens	921	17	32	89	95	17	10	19	6	30	22	51	56	43	47	9	7	24	23	30	35	0	0	13	29	0	0	33	34	20	5	12	13	14	16	19	26	0	8	10	7
Root	k__Bacteria	p__Firmicutes	c__Erysipelotrichi	o__Erysipelotrichales	f__Erysipelotrichaceae	g__[Eubacterium]	s__dolichum	914	4	6	4	6	12	8	17	20	2	3	3	0	12	10	0	3	5	6	5	11	0	0	3	1	1	2	330	347	0	0	13	15	16	21	1	1	7	10	5	4
Root	k__Bacteria	p__Firmicutes	c__Bacilli	o__Turicibacterales	f__Turicibacteraceae	g__Turicibacter	s__	887	18	11	0	4	16	27	0	0	5	2	6	1	0	0	136	133	9	5	14	12	1	2	32	20	1	0	1	1	12	13	41	55	5	16	131	134	7	6	7	3
Root	k__Bacteria	p__Firmicutes	c__Clostridia	o__Clostridiales	f__Ruminococcaceae	g__Anaerofilum	s__	887	41	45	44	60	16	17	31	41	26	31	52	46	12	15	37	28	15	20	23	20	0	0	17	16	0	0	15	7	3	5	43	33	6	7	54	49	3	2	4	3
Root	k__Bacteria	p__Firmicutes	c__Clostridia	o__Clostridiales	f__Lachnospiraceae	g__Shuttleworthia	s__	859	9	11	7	8	17	21	30	37	12	13	28	23	6	12	4	7	8	4	5	5	1	2	4	2	3	2	199	170	3	4	4	7	48	63	14	13	23	17	10	3
Root	k__Bacteria	p__Proteobacteria	c__Gammaproteobacteria	o__Enterobacteriales	f__Enterobacteriaceae	g__Serratia	s__marcescens	852	0	0	0	0	0	0	0	0	1	0	0	0	0	0	0	0	1	0	0	0	0	0	0	0	0	1	454	394	1	0	0	0	0	0	0	0	0	0	0	0
Root	k__Bacteria	p__Proteobacteria	c__Deltaproteobacteria	o__Desulfovibrionales	f__Desulfovibrionaceae	g__Desulfovibrio	s__	812	0	0	3	2	7	4	8	4	50	52	137	138	4	2	0	0	0	0	1	0	1	0	95	121	3	0	2	0	65	67	3	3	5	11	1	0	7	16	0	0
Root	k__Archaea	p__Euryarchaeota	c__Methanobacteria	o__Methanobacteriales	f__Methanobacteriaceae	g__Methanobrevibacter	s__	811	0	0	0	1	0	0	0	0	7	5	2	1	1	2	1	0	2	2	0	1	0	0	119	101	0	0	0	0	223	265	14	12	11	12	2	1	14	6	2	4
Root	k__Bacteria	p__Firmicutes	c__Clostridia	o__Clostridiales	f__Lachnospiraceae	g__Blautia	s__obeum	793	29	25	13	14	42	42	33	27	27	25	89	90	18	5	12	24	19	13	17	34	1	3	6	1	2	1	1	0	0	1	10	18	28	30	26	28	3	3	20	13
Root	k__Bacteria	p__Firmicutes	c__Clostridia	o__Clostridiales	f__Lachnospiraceae	g__Butyrivibrio	s__	790	24	27	20	24	33	31	71	69	15	17	24	25	23	26	15	8	13	9	14	13	11	15	5	9	18	10	24	11	5	3	14	13	42	24	19	19	13	15	8	11
Root	k__Bacteria	p__Actinobacteria	c__Coriobacteriia	o__Coriobacteriales	f__Coriobacteriaceae	g__Collinsella	s__	760	3	2	21	29	3	2	105	127	14	12	24	21	19	13	16	9	33	25	29	23	4	6	4	5	2	5	15	12	0	0	45	40	18	12	19	9	4	4	18	8
Root	k__Bacteria	p__Bacteroidetes	c__Bacteroidia	o__Bacteroidales	f__Bacteroidaceae	g__Bacteroides	s__acidifaciens	751	41	41	12	12	48	44	35	21	2	2	9	14	1	1	0	0	1	3	5	5	34	22	4	7	36	34	110	103	7	4	9	9	3	3	5	7	26	30	1	0
Root	k__Bacteria	p__Firmicutes	c__Clostridia	o__Clostridiales	f__Lachnospiraceae	g__Shuttleworthia	s__satelles	726	5	8	17	17	7	7	85	77	11	7	21	21	45	34	25	19	6	9	9	4	0	6	2	0	1	3	18	24	0	3	11	9	47	55	35	28	15	17	10	8
Root	k__Bacteria	p__Proteobacteria	c__Gammaproteobacteria	o__Pseudomonadales	f__Pseudomonadaceae	g__Pseudomonas	s__	719	0	0	0	2	0	0	1	0	0	0	1	0	0	0	0	0	0	0	0	0	0	0	0	1	0	2	357	353	0	0	0	2	0	0	0	0	0	0	0	0
Root	k__Bacteria	p__Proteobacteria	c__Gammaproteobacteria	o__Enterobacteriales	f__Enterobacteriaceae	g__CandidatusHamiltonella	s__	718	0	0	0	0	0	0	0	0	0	0	0	0	0	0	0	0	0	3	0	0	0	0	2	1	0	0	361	347	1	1	0	0	0	0	1	0	0	1	0	0
Root	k__Bacteria	p__Firmicutes	c__Clostridia	o__Clostridiales	f__[Mogibacteriaceae]	g__	s__	683	16	12	16	21	13	12	13	19	10	16	34	27	35	26	14	30	9	18	15	10	3	4	27	15	1	3	6	3	14	12	57	58	13	15	51	26	0	2	5	2
Root	k__Bacteria	p__Bacteroidetes	c__Bacteroidia	o__Bacteroidales	f__Bacteroidaceae	g__Bacteroides	s__plebeius	671	43	52	10	7	77	88	19	13	13	9	19	21	20	17	3	1	5	7	14	9	15	11	1	3	19	25	37	30	3	1	4	5	6	3	15	27	4	2	7	6
Root	k__Bacteria	p__Firmicutes	c__Clostridia	o__Clostridiales	f__Lachnospiraceae	g__Lachnobacterium	s__	667	14	10	3	2	5	6	6	8	26	32	40	49	15	13	12	8	20	17	23	25	0	0	2	1	2	0	113	111	0	1	1	5	4	6	21	14	18	25	8	1
Root	k__Bacteria	p__Firmicutes	c__Erysipelotrichi	o__Erysipelotrichales	f__Erysipelotrichaceae	g__Coprobacillus	s__	599	32	23	8	18	36	24	12	22	16	10	22	14	2	2	5	8	9	4	12	14	1	0	5	11	0	0	17	7	3	6	4	4	63	69	11	8	21	19	31	26
Root	k__Bacteria	p__Proteobacteria	c__Betaproteobacteria	o__Burkholderiales	f__Comamonadaceae	g__	s__	597	8	3	2	3	8	9	24	20	20	12	24	31	7	4	3	0	8	1	8	6	58	59	3	4	75	63	14	14	1	0	8	14	12	8	4	2	30	16	4	7
Root	k__Bacteria	p__Firmicutes	c__Erysipelotrichi	o__Erysipelotrichales	f__Erysipelotrichaceae	g__[Eubacterium]	s__cylindroides	540	6	3	13	17	1	3	0	1	0	0	0	0	66	46	0	0	24	20	36	24	0	0	0	0	0	0	0	0	1	0	49	35	64	66	5	5	0	0	26	29
Root	k__Bacteria	p__Proteobacteria	c__Gammaproteobacteria	o__Enterobacteriales	f__Enterobacteriaceae	g__CandidatusPhlomobacter	s__	502	0	0	0	0	0	0	0	0	0	0	0	0	0	0	1	0	0	0	1	0	0	0	2	2	0	0	240	249	1	1	1	1	0	1	0	0	1	0	1	0
Root	k__Bacteria	p__Proteobacteria	c__Gammaproteobacteria	o__Pasteurellales	f__Pasteurellaceae	g__Haemophilus	s__parainfluenzae	501	7	8	4	1	6	4	11	8	8	2	4	9	6	1	10	10	4	2	3	4	29	18	9	6	31	37	12	16	1	5	83	77	13	5	10	16	7	6	4	4
Root	k__Bacteria	p__Bacteroidetes	c__Bacteroidia	o__Bacteroidales	f__Prevotellaceae	g__Prevotella	s__nanceiensis	487	0	1	1	0	0	2	1	0	6	3	2	2	16	27	1	3	35	30	41	38	2	5	0	0	2	3	2	1	2	0	0	0	60	47	9	10	0	0	72	63
Root	k__Bacteria	p__Actinobacteria	c__Actinobacteria	o__Bifidobacteriales	f__Bifidobacteriaceae	g__	s__	481	4	5	4	6	10	4	9	11	9	11	10	12	3	5	2	7	10	12	18	9	0	0	1	0	0	0	9	15	0	0	56	55	21	13	7	1	68	63	4	7
Root	k__Bacteria	p__Proteobacteria	c__Gammaproteobacteria	o__Pasteurellales	f__Pasteurellaceae	g__Haemophilus	s__	471	1	2	2	1	2	0	5	1	0	0	0	0	0	1	0	1	1	0	1	1	6	3	1	4	6	6	194	191	0	1	12	16	3	1	3	2	1	0	0	2
Root	k__Bacteria	p__Bacteroidetes	c__Bacteroidia	o__Bacteroidales	f__Porphyromonadaceae	g__Tannerella	s__	444	9	15	6	9	25	34	15	14	13	10	15	38	6	8	0	0	4	5	9	14	22	20	5	9	19	24	23	24	17	12	5	5	0	3	2	1	2	2	0	0
Root	k__Bacteria	p__Bacteroidetes	c__Bacteroidia	o__Bacteroidales	f__Rikenellaceae	g__Blvii28	s__	443	2	3	3	1	3	1	14	9	5	6	7	13	7	8	0	0	5	3	3	3	57	59	3	5	62	71	26	37	1	2	5	3	4	4	2	1	0	0	4	1
Root	k__Bacteria	p__Proteobacteria	c__Gammaproteobacteria	o__Enterobacteriales	f__Enterobacteriaceae	g__Plesiomonas	s__shigelloides	415	0	0	0	0	0	0	0	0	0	0	0	0	0	0	1	0	0	0	0	0	0	0	1	0	0	1	193	216	0	1	1	1	0	0	0	0	0	0	0	0
Root	k__Bacteria	p__Firmicutes	c__Clostridia	o__Clostridiales	f__Veillonellaceae	g__Veillonella	s__dispar	414	7	8	4	9	5	2	24	16	11	5	10	6	6	7	3	4	2	2	3	2	28	18	2	2	26	16	69	59	0	0	14	17	4	3	8	7	1	3	0	1
Root	k__Bacteria	p__Proteobacteria	c__Gammaproteobacteria	o__Enterobacteriales	f__Enterobacteriaceae	g__Serratia	s__symbiotica	402	0	0	0	0	0	0	0	0	0	1	1	0	0	0	0	0	0	0	0	0	0	0	0	0	0	0	215	184	0	0	0	1	0	0	0	0	0	0	0	0
Root	k__Bacteria	p__Firmicutes	c__Clostridia	o__Clostridiales	f__[Mogibacteriaceae]	g__Mogibacterium	s__	392	0	0	0	1	0	0	0	0	0	0	1	1	2	0	1	1	1	1	1	1	0	0	3	1	0	1	91	92	0	0	85	72	8	18	1	3	1	1	2	2
Root	k__Bacteria	p__Firmicutes	c__Clostridia	o__Clostridiales	f__Ruminococcaceae	g__Clostridium	s__methylpentosum	391	0	1	3	2	2	3	1	1	67	73	70	57	2	4	1	0	5	1	1	3	0	0	32	26	0	0	1	1	11	14	3	0	0	2	0	0	2	2	0	0
Root	k__Bacteria	p__Bacteroidetes	c__Bacteroidia	o__Bacteroidales	f__Porphyromonadaceae	g__Parabacteroides	s__gordonii	377	0	1	5	6	0	0	0	0	0	0	0	1	0	0	0	0	0	0	0	0	2	4	40	40	5	1	0	0	42	50	0	1	3	1	1	1	85	88	0	0
Root	k__Bacteria	p__Firmicutes	c__Clostridia	o__Clostridiales	f__Ruminococcaceae	g__Ruminococcus	s__bromii	374	13	19	8	11	3	5	2	0	2	0	0	0	0	0	10	12	1	5	1	5	0	0	0	0	0	0	0	0	0	0	103	121	7	12	17	11	1	0	4	1
Root	k__Bacteria	p__Proteobacteria	c__Gammaproteobacteria	o__Enterobacteriales	f__Enterobacteriaceae	g__Erwinia	s__dispersa	374	0	0	0	0	0	1	0	0	0	0	0	0	0	0	0	0	0	1	0	0	0	0	2	1	0	0	179	186	1	2	0	1	0	0	0	0	0	0	0	0
Root	k__Bacteria	p__Firmicutes	c__Clostridia	o__Clostridiales	f__Veillonellaceae	g__Succiniclasticum	s__	368	4	9	5	5	3	0	107	71	4	2	10	13	0	0	16	17	1	1	1	0	0	1	1	2	0	0	15	8	0	0	0	0	5	4	29	28	2	1	1	2
Root	k__Bacteria	p__Bacteroidetes	c__Bacteroidia	o__Bacteroidales	f__Porphyromonadaceae	g__Paludibacter	s__	353	3	6	0	1	7	2	3	3	2	1	3	2	2	1	0	0	4	2	6	1	3	2	34	27	1	2	2	5	19	19	2	5	1	1	3	0	92	84	0	2
Root	k__Bacteria	p__Firmicutes	c__Bacilli	o__Lactobacillales	f__Lactobacillaceae	g__Lactobacillus	s__mucosae	352	0	0	0	0	0	0	0	0	0	0	0	0	0	0	0	0	0	0	0	0	0	0	0	0	0	0	0	0	0	0	136	149	25	20	1	1	3	0	6	11
Root	k__Bacteria	p__Proteobacteria	c__Betaproteobacteria	o__Burkholderiales	f__Oxalobacteraceae	g__	s__	335	4	4	2	4	9	9	12	22	9	9	19	8	3	3	0	0	6	2	5	1	42	31	1	1	36	27	9	5	0	0	7	9	1	2	2	3	10	15	1	2
Root	k__Bacteria	p__Firmicutes	c__Bacilli	o__Bacillales	f__Bacillaceae	g__	s__	310	3	3	1	2	5	7	0	0	2	2	1	0	0	0	46	40	3	2	6	5	1	0	8	5	2	0	3	4	2	2	18	19	0	4	52	57	1	4	0	0
Root	k__Bacteria	p__Bacteroidetes	c__Bacteroidia	o__Bacteroidales	f__[Paraprevotellaceae]	g__CF231	s__	305	6	6	7	10	6	8	5	7	6	7	21	22	12	7	0	0	2	9	7	2	5	2	4	5	9	7	25	19	6	7	1	3	12	18	1	1	2	6	14	8
Root	k__Bacteria	p__Firmicutes	c__Clostridia	o__Clostridiales	f__Veillonellaceae	g__Veillonella	s__parvula	305	3	3	4	3	2	1	16	13	2	3	5	4	3	8	4	3	0	2	3	4	20	13	2	0	28	28	39	42	0	0	8	10	0	0	5	7	7	8	1	1
Root	k__Bacteria	p__Bacteroidetes	c__Bacteroidia	o__Bacteroidales	f__Marinilabiaceae	g__	s__	294	4	14	0	2	5	12	16	6	4	5	11	4	3	1	0	0	4	1	6	5	24	22	7	8	39	22	20	12	5	7	6	3	1	6	3	0	1	2	1	2
Root	k__Bacteria	p__Firmicutes	c__Erysipelotrichi	o__Erysipelotrichales	f__Erysipelotrichaceae	g__cc_115	s__	292	9	3	2	3	14	19	0	0	3	0	10	9	0	1	0	1	0	3	0	1	0	0	16	14	0	0	97	60	2	4	2	13	3	0	0	0	0	2	0	1
Root	k__Bacteria	p__Actinobacteria	c__Coriobacteriia	o__Coriobacteriales	f__Coriobacteriaceae	g__Slackia	s__	279	0	1	2	2	1	2	8	12	6	2	8	7	0	0	5	9	6	0	4	4	0	0	0	1	0	1	2	3	0	0	58	61	9	16	20	13	0	0	6	10
Root	k__Bacteria	p__Bacteroidetes	c__Bacteroidia	o__Bacteroidales	f__[Paraprevotellaceae]	g__	s__	269	1	6	7	8	2	3	0	0	4	1	6	9	18	23	1	1	15	21	22	12	3	3	1	2	0	1	0	1	1	2	5	2	7	12	25	21	1	1	11	10
Root	k__Bacteria	p__Firmicutes	c__Clostridia	o__Clostridiales	f__Veillonellaceae	g__vadinHB04	s__	253	6	3	2	1	1	1	51	55	2	7	17	8	0	1	3	0	0	0	0	0	1	0	0	0	0	0	42	35	1	0	0	0	0	0	8	8	0	0	0	0
Root	k__Bacteria	p__Firmicutes	c__Clostridia	o__Clostridiales	f__Lachnospiraceae	g__[Ruminococcus]	s__torques	249	10	13	10	8	12	5	25	16	6	2	22	10	4	0	2	1	3	3	5	2	1	3	6	7	3	2	2	0	6	7	11	4	11	10	2	2	1	3	4	5
Root	k__Bacteria	p__Firmicutes	c__Clostridia	o__Clostridiales	f__Peptostreptococcaceae	g__[Clostridium]	s__difficile	247	0	1	4	5	0	1	2	5	0	2	3	4	1	0	2	4	3	0	2	3	0	2	4	1	5	0	77	82	0	0	3	7	1	6	1	5	1	0	4	6
Root	k__Bacteria	p__Actinobacteria	c__Actinobacteria	o__Bifidobacteriales	f__Bifidobacteriaceae	g__Bifidobacterium	s__bifidum	241	0	1	0	1	1	0	0	0	5	7	7	7	9	10	0	0	13	19	29	39	0	0	2	1	0	0	0	0	1	0	32	27	6	5	0	0	6	7	5	1
Root	k__Bacteria	p__Firmicutes	c__Clostridia	o__Halanaerobiales	f__Halanaerobiaceae	g__	s__	238	5	4	6	9	2	0	16	10	1	0	0	3	0	0	4	3	1	2	5	1	11	6	4	7	5	9	12	8	1	2	11	13	12	11	15	9	1	2	18	9
Root	k__Bacteria	p__Proteobacteria	c__Betaproteobacteria	o__Burkholderiales	f__Alcaligenaceae	g__	s__	237	7	8	7	8	7	5	7	8	6	7	13	9	0	2	0	0	1	1	4	1	17	14	2	2	22	22	3	3	0	0	5	1	5	4	1	7	14	11	2	1
Root	k__Bacteria	p__Proteobacteria	c__Gammaproteobacteria	o__Enterobacteriales	f__Enterobacteriaceae	g__Trabulsiella	s__	223	0	0	0	0	0	0	0	0	0	0	0	0	0	0	0	0	0	0	0	0	0	0	0	0	0	0	112	109	0	1	0	0	1	0	0	0	0	0	0	0
Root	k__Bacteria	p__Actinobacteria	c__Actinobacteria	o__Actinomycetales	f__Actinomycetaceae	g__Actinomyces	s__	220	3	4	8	3	1	1	10	13	1	2	5	4	1	1	3	8	0	3	2	2	0	3	4	2	0	1	36	37	0	0	14	14	4	3	5	5	5	1	3	8
Root	k__Bacteria	p__Bacteroidetes	c__Bacteroidia	o__Bacteroidales	f__Rikenellaceae	g__Rikenella	s__	207	0	0	0	0	2	0	0	0	0	2	1	1	0	1	0	0	0	0	0	0	0	1	49	52	0	0	0	0	33	43	1	1	1	6	0	0	9	4	0	0
Root	k__Bacteria	p__Firmicutes	c__Bacilli	o__Lactobacillales	f__Enterococcaceae	g__Enterococcus	s__	206	4	4	1	1	0	1	4	1	1	2	0	0	1	0	4	5	1	3	4	3	0	0	0	0	0	0	44	53	0	0	10	8	10	9	9	2	3	2	8	8
Root	k__Bacteria	p__Firmicutes	c__Clostridia	o__Clostridiales	f__Veillonellaceae	g__Sporomusa	s__	205	8	8	4	5	1	1	38	49	7	5	7	5	2	0	2	3	0	1	0	1	0	0	1	0	0	0	14	12	1	0	1	0	0	0	16	7	1	4	0	1
Root	k__Bacteria	p__Firmicutes	c__Erysipelotrichi	o__Erysipelotrichales	f__Erysipelotrichaceae	g__Coprobacillus	s__cateniformis	205	7	10	11	14	10	14	0	2	5	5	2	6	1	0	1	3	2	2	7	3	0	0	0	0	0	0	3	1	0	1	0	0	29	30	4	4	3	3	13	9
Root	k__Bacteria	p__Firmicutes	c__Bacilli	o__Bacillales	f__	g__	s__	202	4	3	0	1	6	6	0	0	2	0	0	2	0	0	33	23	2	2	2	2	0	0	4	6	0	0	1	0	2	0	11	13	2	0	32	36	1	3	2	1
Root	k__Bacteria	p__Bacteroidetes	c__Bacteroidia	o__Bacteroidales	f__Porphyromonadaceae	g__Porphyromonas	s__	201	3	3	2	4	7	4	3	6	5	1	4	9	2	2	0	0	1	2	6	0	12	6	3	5	6	4	5	6	3	2	0	3	3	1	0	1	30	39	3	5
Root	k__Bacteria	p__Proteobacteria	c__Gammaproteobacteria	o__Enterobacteriales	f__Enterobacteriaceae	g__Baumannia	s__cicadellinicola	201	0	0	0	0	0	0	0	0	0	0	0	0	0	0	0	0	0	0	0	0	0	0	0	1	0	0	97	102	0	1	0	0	0	0	0	0	0	0	0	0
Root	k__Bacteria	p__Actinobacteria	c__Coriobacteriia	o__Coriobacteriales	f__Coriobacteriaceae	g__Adlercreutzia	s__	196	5	7	5	6	6	9	10	10	14	6	5	5	6	2	0	3	2	4	14	8	0	0	4	3	0	0	10	16	0	1	14	9	0	0	6	3	0	2	1	0
Root	k__Bacteria	p__Firmicutes	c__Bacilli	o__Lactobacillales	f__Lactobacillaceae	g__Lactobacillus	s__	190	4	2	1	1	3	7	1	3	0	1	1	0	0	0	0	0	2	3	3	0	1	1	3	1	0	2	11	11	0	0	50	47	5	9	2	2	1	2	5	5
Root	k__Bacteria	p__Bacteroidetes	c__Bacteroidia	o__Bacteroidales	f__Porphyromonadaceae	g__CandidatusAzobacteroides	s__	177	5	7	2	2	10	12	12	12	2	4	7	2	2	3	0	0	0	0	0	1	2	2	8	4	0	5	5	8	3	2	2	3	1	2	1	0	21	22	1	2
Root	k__Bacteria	p__Bacteroidetes	c__Bacteroidia	o__Bacteroidales	f__Prevotellaceae	g__	s__	175	2	4	1	2	10	10	0	0	6	5	3	5	5	9	1	0	7	6	6	3	0	0	0	1	0	0	0	0	0	0	26	44	7	2	2	6	0	0	2	0
Root	k__Bacteria	p__Firmicutes	c__Clostridia	o__Natranaerobiales	f__Anaerobrancaceae	g__	s__	169	3	1	7	8	1	1	5	9	3	3	1	2	0	0	1	3	1	1	2	1	12	14	6	3	6	9	1	0	1	3	14	10	8	3	9	8	0	1	5	3
Root	k__Bacteria	p__Lentisphaerae	c__[Lentisphaeria]	o__Victivallales	f__Victivallaceae	g__	s__	153	13	14	19	26	8	2	1	0	5	6	5	7	0	1	0	0	0	0	0	2	0	0	14	15	0	0	0	0	5	9	0	0	0	0	0	1	0	0	0	0
Root	k__Bacteria	p__Proteobacteria	c__Gammaproteobacteria	o__Enterobacteriales	f__Enterobacteriaceae	g__Enterobacter	s__cloacae	148	0	0	0	0	0	0	0	0	0	0	0	0	0	0	0	0	1	0	0	0	0	0	1	2	0	0	74	68	1	0	0	0	0	0	0	0	1	0	0	0
Root	k__Bacteria	p__Firmicutes	c__Clostridia	o__Clostridiales	f__Veillonellaceae	g__Megamonas	s__hypermegale	145	0	0	0	0	0	0	0	0	2	4	16	18	0	0	1	1	0	0	0	0	0	0	0	0	0	0	0	0	0	0	0	0	17	25	1	3	0	0	29	28
Root	k__Bacteria	p__Bacteroidetes	c__Bacteroidia	o__Bacteroidales	f__Bacteroidaceae	g__	s__	143	2	1	0	0	1	2	2	3	3	1	2	4	1	2	0	0	2	1	3	2	0	1	15	8	1	0	6	2	8	6	2	0	0	1	0	2	24	35	0	0
Root	k__Bacteria	p__Bacteroidetes	c__Bacteroidia	o__Bacteroidales	f__Rikenellaceae	g__Alistipes	s__indistinctus	135	0	1	0	1	0	1	0	1	0	1	0	0	26	28	0	0	22	11	26	11	0	0	0	0	0	0	0	0	2	1	0	0	0	0	1	2	0	0	0	0
Root	k__Bacteria	p__Firmicutes	c__Clostridia	o__Clostridiales	f__[Acidaminobacteraceae]	g__Fusibacter	s__	132	0	3	0	2	2	2	3	4	1	0	1	0	0	0	3	0	0	1	1	0	9	3	1	2	8	4	10	2	3	2	6	4	5	14	6	8	1	3	9	9
Root	k__Bacteria	p__Proteobacteria	c__Gammaproteobacteria	o__Enterobacteriales	f__Enterobacteriaceae	g__Sodalis	s__	132	0	0	0	1	0	0	0	0	0	0	0	0	0	0	0	0	0	0	0	0	0	0	0	0	0	0	61	70	0	0	0	0	0	0	0	0	0	0	0	0
Root	k__Bacteria	p__Actinobacteria	c__Coriobacteriia	o__Coriobacteriales	f__Coriobacteriaceae	g__Collinsella	s__stercoris	129	1	0	2	0	0	0	42	34	0	0	3	2	2	2	0	0	4	3	4	4	1	0	1	0	1	0	0	0	0	0	6	4	1	2	5	2	0	0	2	1
Root	k__Bacteria	p__Proteobacteria	c__Betaproteobacteria	o__SBla14	f__	g__	s__	127	0	0	0	0	2	1	13	13	1	0	4	1	0	0	0	0	3	0	0	1	21	18	2	1	12	15	4	2	0	0	2	2	0	0	0	1	5	3	0	0
Root	k__Bacteria	p__Proteobacteria	c__Gammaproteobacteria	o__Chromatiales	f__Ectothiorhodospiraceae	g__	s__	121	1	2	1	0	10	4	2	3	3	0	2	5	2	2	0	0	1	0	1	1	13	11	2	3	15	11	3	2	0	0	3	6	1	0	2	1	4	3	0	1
Root	k__Bacteria	p__Proteobacteria	c__Gammaproteobacteria	o__Chromatiales	f__	g__	s__	116	1	0	0	0	3	4	1	0	1	3	2	2	2	1	0	0	2	3	2	4	17	12	0	0	22	12	3	5	0	0	0	2	0	2	0	0	5	5	0	0
Root	k__Bacteria	p__Firmicutes	c__Erysipelotrichi	o__Erysipelotrichales	f__Erysipelotrichaceae	g__Holdemania	s__	113	1	2	2	3	3	2	22	21	0	0	3	1	3	2	6	3	1	0	1	1	0	0	2	2	0	0	0	0	0	1	2	9	2	3	2	7	0	0	5	1
Root	k__Bacteria	p__Proteobacteria	c__Alphaproteobacteria	o__Rhodospirillales	f__Acetobacteraceae	g__	s__	111	0	0	0	0	0	0	0	0	0	2	11	18	2	0	5	2	0	0	2	0	0	0	0	0	0	0	0	0	0	0	1	0	13	14	3	7	0	0	16	15
Root	k__Bacteria	p__Bacteroidetes	c__Bacteroidia	o__Bacteroidales	f__SB-1	g__	s__	107	2	2	0	1	5	2	5	7	1	1	2	1	1	0	0	0	1	0	2	0	14	9	4	2	11	14	10	5	1	1	1	2	0	0	0	0	0	0	0	0
Root	k__Bacteria	p__Firmicutes	c__Clostridia	o__Clostridiales	f__Peptococcaceae	g__	s__	107	18	7	0	0	0	0	0	1	1	0	0	0	6	3	0	0	2	3	3	1	0	0	11	19	0	0	0	0	5	4	0	1	0	0	9	9	3	1	0	0
Root	k__Bacteria	p__Proteobacteria	c__Gammaproteobacteria	o__Xanthomonadales	f__Xanthomonadaceae	g__Wohlfahrtiimonas	s__	106	0	0	0	0	0	0	0	0	0	0	1	0	1	0	0	0	0	0	0	0	0	0	0	0	0	0	56	47	1	0	0	0	0	0	0	0	0	0	0	0
Root	k__Bacteria	p__Proteobacteria	c__Gammaproteobacteria	o__Pasteurellales	f__Pasteurellaceae	g__	s__	104	0	2	1	0	1	0	2	0	0	1	2	2	1	2	0	1	0	0	0	0	2	5	2	1	4	12	10	10	0	1	17	14	2	2	2	2	1	1	1	0
Root	k__Bacteria	p__Proteobacteria	c__Gammaproteobacteria	o__Vibrionales	f__Vibrionaceae	g__Vibrio	s__	103	0	0	0	0	0	0	0	0	0	0	0	0	0	0	0	1	0	0	0	0	0	0	0	0	0	0	51	51	0	0	0	0	0	0	0	0	0	0	0	0
Root	k__Bacteria	p__Firmicutes	c__Clostridia	o__Clostridiales	f__Ruminococcaceae	g__Ruminococcus	s__albus	102	6	3	10	10	2	0	0	0	0	0	0	0	15	10	5	2	8	4	4	5	0	0	0	0	0	0	0	0	0	0	1	4	0	0	6	1	3	3	0	0
Root	k__Bacteria	p__Bacteroidetes	c__Bacteroidia	o__Bacteroidales	f__Rikenellaceae	g__Alistipes	s__massiliensis	100	1	0	1	0	0	0	1	0	0	0	0	0	28	9	0	1	12	12	11	17	0	0	2	0	0	0	0	0	0	3	0	0	0	0	2	0	0	0	0	0
Root	k__Bacteria	p__Firmicutes	c__Clostridia	o__Clostridiales	f__Lachnospiraceae	g__Moryella	s__	100	3	2	3	1	4	5	7	7	0	0	2	0	2	0	0	2	1	0	0	1	0	0	9	10	1	0	1	4	9	11	1	1	2	5	1	1	2	2	0	0
Root	k__Bacteria	p__Proteobacteria	c__Gammaproteobacteria	o__Pseudomonadales	f__Moraxellaceae	g__Acinetobacter	s__	97	0	0	0	0	0	0	0	0	0	0	0	0	0	0	0	0	0	0	0	0	0	0	0	0	0	0	52	45	0	0	0	0	0	0	0	0	0	0	0	0
Root	k__Bacteria	p__Firmicutes	c__Bacilli	o__Gemellales	f__Gemellaceae	g__	s__	92	5	3	1	0	1	1	1	0	5	0	2	0	0	0	5	3	4	1	4	2	0	0	1	1	0	0	7	4	0	0	0	1	10	5	11	3	4	3	0	4
Root	k__Bacteria	p__Bacteroidetes	c__Flavobacteriia	o__Flavobacteriales	f__Flavobacteriaceae	g__Krokinobacter	s__genikus	91	6	3	12	15	2	3	3	0	0	0	1	0	0	0	0	0	1	1	2	2	0	0	10	9	0	0	1	0	6	10	1	2	0	0	0	1	0	0	0	0
Root	k__Bacteria	p__Firmicutes	c__Clostridia	o__Clostridiales	f__Lachnospiraceae	g__Syntrophococcus	s__sucromutans	90	4	0	1	2	0	0	6	6	0	0	0	6	7	6	1	2	1	2	2	1	0	2	2	2	0	0	2	0	1	0	0	4	14	7	2	2	0	1	1	3
Root	k__Bacteria	p__Firmicutes	c__Clostridia	o__Clostridiales	f__Ruminococcaceae	g__Ethanoligenens	s__	90	3	3	7	3	3	3	4	13	1	1	1	2	3	2	0	1	3	0	6	5	0	0	2	0	0	0	3	5	0	1	6	4	2	1	1	0	0	1	0	0
Root	k__Bacteria	p__Firmicutes	c__Clostridia	o__Clostridiales	f__Clostridiaceae	g__Clostridium	s__perfringens	87	1	3	0	0	5	6	6	9	0	1	2	3	1	0	0	1	1	2	3	4	0	1	5	4	1	1	1	2	3	6	0	0	4	4	1	2	0	0	2	2
Root	k__Bacteria	p__Actinobacteria	c__Coriobacteriia	o__Coriobacteriales	f__Coriobacteriaceae	g__Eggerthella	s__lenta	86	0	0	0	0	0	2	3	0	0	1	1	0	0	0	4	0	0	0	0	0	0	0	0	0	0	0	37	20	1	0	0	1	2	1	0	1	4	4	2	2
Root	k__Bacteria	p__Firmicutes	c__Clostridia	o__Clostridiales	f__Peptococcaceae	g__Peptococcus	s__	86	0	0	1	0	2	0	12	7	1	0	2	2	4	3	0	5	4	9	13	8	0	0	0	0	0	0	1	2	0	0	0	0	0	0	2	3	2	2	1	0
Root	k__Bacteria	p__Firmicutes	c__Erysipelotrichi	o__Erysipelotrichales	f__Erysipelotrichaceae	g__Bulleidia	s__	86	0	1	3	3	1	1	0	0	0	0	0	0	6	9	1	0	7	3	3	2	0	0	0	0	1	0	0	0	0	0	10	5	9	11	0	0	0	1	7	2
Root	k__Bacteria	p__Proteobacteria	c__Betaproteobacteria	o__SC-I-84	f__	g__	s__	85	1	1	1	7	2	2	5	7	2	3	3	1	0	1	0	0	2	1	3	1	9	5	0	0	3	7	0	1	0	0	0	2	4	4	0	0	1	1	2	3
Root	k__Bacteria	p__Firmicutes	c__Clostridia	o__Clostridiales	f__Ruminococcaceae	g__Oscillospira	s__guilliermondii	82	2	4	1	3	6	3	6	2	1	0	2	4	2	3	1	0	1	5	2	3	0	0	7	5	0	0	0	2	2	3	1	2	3	0	1	1	0	3	1	0
Root	k__Bacteria	p__Bacteroidetes	c__Bacteroidia	o__Bacteroidales	f__Bacteroidaceae	g__Bacteroides	s__barnesiae	75	1	1	0	0	0	0	0	0	1	1	0	0	0	0	0	0	0	0	0	0	11	13	2	0	14	18	6	4	0	0	1	0	0	0	1	1	0	0	0	0
Root	k__Bacteria	p__Bacteroidetes	c__Bacteroidia	o__Bacteroidales	f__Rikenellaceae	g__PW3	s__	74	2	2	0	1	5	1	0	1	1	1	4	2	7	7	0	0	5	6	5	12	0	0	3	4	0	0	0	0	1	3	0	0	1	0	0	0	0	0	0	0
Root	k__Bacteria	p__Proteobacteria	c__Gammaproteobacteria	o__Alteromonadales	f__HTCC2188	g__	s__	73	0	0	0	0	0	0	0	0	0	0	0	0	0	0	0	0	0	1	0	0	0	0	0	0	0	0	35	37	0	0	0	0	0	0	0	0	0	0	0	0
Root	k__Bacteria	p__Proteobacteria	c__Betaproteobacteria	o__Burkholderiales	f__	g__	s__	72	0	1	0	5	0	2	8	4	1	1	2	3	1	0	0	0	0	0	1	0	4	3	1	2	6	5	2	1	0	0	1	1	6	1	1	1	5	1	1	1
Root	k__Bacteria	p__Proteobacteria	c__Deltaproteobacteria	o__Desulfovibrionales	f__Desulfovibrionaceae	g__	s__	71	2	3	1	6	3	3	1	1	3	0	8	7	0	0	0	0	0	0	0	0	0	0	5	6	0	0	0	0	6	9	1	0	1	0	0	3	0	2	0	0
Root	k__Bacteria	p__Proteobacteria	c__Betaproteobacteria	o__	f__	g__	s__	70	1	1	1	0	0	0	2	5	0	1	2	4	0	0	0	0	0	0	0	1	1	6	0	0	1	6	2	1	0	1	2	2	8	5	0	1	5	2	7	2
Root	k__Bacteria	p__Firmicutes	c__Clostridia	o__Clostridiales	f__Lachnospiraceae	g__Oribacterium	s__	69	3	2	4	5	5	2	11	7	0	0	1	0	0	2	2	1	0	0	2	3	3	0	1	1	1	0	0	1	3	1	0	0	1	3	1	3	0	0	0	0
Root	k__Bacteria	p__Firmicutes	c__Erysipelotrichi	o__Erysipelotrichales	f__Erysipelotrichaceae	g__Allobaculum	s__	69	0	0	1	0	1	0	2	1	0	0	0	0	2	1	0	0	0	1	1	1	0	0	0	0	0	0	1	1	0	0	0	0	2	2	0	0	27	23	0	2
Root	k__Bacteria	p__Actinobacteria	c__Coriobacteriia	o__Coriobacteriales	f__Coriobacteriaceae	g__Atopobium	s__vaginae	68	0	0	1	4	0	0	11	8	0	3	6	4	1	0	1	0	1	0	1	1	0	1	1	0	0	1	0	0	0	0	5	7	2	3	1	2	0	0	2	1
Root	k__Bacteria	p__Firmicutes	c__Bacilli	o__Lactobacillales	f__Carnobacteriaceae	g__Granulicatella	s__	68	0	0	0	1	0	1	1	5	0	0	1	0	0	1	1	1	0	0	0	0	2	0	0	0	0	0	6	4	0	0	0	0	12	12	9	3	0	0	4	4
Root	k__Bacteria	p__Proteobacteria	c__Betaproteobacteria	o__Methylophilales	f__	g__	s__	68	2	0	0	0	0	1	1	0	0	0	2	0	2	0	0	0	0	1	1	2	11	10	1	0	12	7	4	2	0	0	0	1	0	0	0	1	4	3	0	0
Root	k__Bacteria	p__Bacteroidetes	c__Bacteroidia	o__Bacteroidales	f__[Paraprevotellaceae]	g__YRC22	s__	67	0	1	1	2	2	0	0	0	0	0	0	0	3	1	1	3	2	1	1	1	0	0	0	0	0	1	7	3	0	0	0	0	3	9	5	1	0	0	7	12
Root	k__Bacteria	p__Proteobacteria	c__Gammaproteobacteria	o__Aeromonadales	f__	g__	s__	67	0	0	0	0	0	0	0	0	0	0	0	0	0	0	0	0	0	0	0	0	0	0	0	0	0	0	28	39	0	0	0	0	0	0	0	0	0	0	0	0
Root	k__Bacteria	p__Firmicutes	c__Bacilli	o__Bacillales	f__Staphylococcaceae	g__Staphylococcus	s__	66	1	0	2	2	1	1	1	2	1	0	2	0	1	1	2	4	3	1	2	3	2	1	1	2	1	1	2	5	0	0	3	0	1	6	3	4	0	1	2	1
Root	k__Bacteria	p__Firmicutes	c__Clostridia	o__Clostridiales	f__Lachnospiraceae	g__Marvinbryantia	s__formatexigens	65	2	1	0	1	0	5	7	8	0	1	1	0	0	1	3	1	1	2	0	0	4	0	2	0	1	2	5	5	1	0	0	0	0	0	3	4	0	1	2	1
Root	k__Bacteria	p__Firmicutes	c__Bacilli	o__Lactobacillales	f__Streptococcaceae	g__Lactococcus	s__	63	2	0	1	1	2	0	0	0	2	2	0	0	1	1	1	0	1	1	0	1	1	4	5	0	2	0	1	2	2	0	1	2	6	8	3	3	2	0	1	4
Root	k__Bacteria	p__Proteobacteria	c__Betaproteobacteria	o__Burkholderiales	f__Comamonadaceae	g__Methylibium	s__	62	3	1	0	0	4	0	0	1	2	2	7	0	1	0	0	0	1	0	0	0	6	3	0	0	6	9	2	1	0	0	0	1	2	3	0	0	2	3	1	1
Root	k__Bacteria	p__Proteobacteria	c__Gammaproteobacteria	o__HTCC2188	f__	g__	s__	62	0	0	0	0	0	0	0	0	0	0	0	0	0	0	1	0	0	0	0	0	0	0	0	1	0	0	31	29	0	0	0	0	0	0	0	0	0	0	0	0
Root	k__Bacteria	p__Proteobacteria	c__Betaproteobacteria	o__Burkholderiales	f__Burkholderiaceae	g__Lautropia	s__	59	1	3	0	0	1	0	1	0	0	0	1	0	1	1	1	0	0	0	2	0	9	8	2	0	7	15	0	1	0	0	1	1	2	0	0	0	1	0	0	0
Root	k__Bacteria	p__Bacteroidetes	c__Bacteroidia	o__Bacteroidales	f__Bacteroidaceae	g__Bacteroides	s__coprosuis	58	4	5	0	1	9	7	0	1	1	0	0	1	0	0	0	1	1	1	0	1	1	1	1	1	1	0	0	0	1	0	0	1	1	0	0	1	9	7	0	0
Root	k__Bacteria	p__Firmicutes	c__Clostridia	o__Clostridiales	f__Veillonellaceae	g__Anaerovibrio	s__	58	0	1	3	0	0	0	1	0	2	1	4	9	0	0	3	1	0	1	0	0	0	0	0	0	0	0	2	0	0	0	0	0	5	2	5	3	4	2	3	6
Root	k__Bacteria	p__Firmicutes	c__Clostridia	o__Clostridiales	f__Clostridiaceae	g__02d06	s__	56	2	1	2	0	1	1	20	11	1	3	1	2	0	0	0	0	2	2	0	1	0	0	1	0	0	0	1	0	0	0	1	1	1	0	0	0	0	0	1	0
Root	k__Bacteria	p__Cyanobacteria	c__Chloroplast	o__Streptophyta	f__	g__	s__	54	0	1	2	0	2	3	2	4	0	5	3	0	0	2	1	1	3	1	4	1	0	0	0	0	0	0	0	1	0	0	0	0	1	2	3	2	1	4	4	1
Root	k__Bacteria	p__Firmicutes	c__Clostridia	o__Clostridiales	f__[Tissierellaceae]	g__Parvimonas	s__	54	0	1	4	0	0	0	2	2	0	2	2	1	0	1	1	1	0	2	0	1	0	0	2	1	0	0	3	0	0	0	3	17	3	0	0	2	1	1	0	1
Root	k__Bacteria	p__Firmicutes	c__Bacilli	o__Bacillales	f__Bacillaceae	g__Bacillus	s__	53	1	1	0	0	0	2	0	0	0	1	1	2	0	0	1	1	3	3	2	2	1	1	2	1	0	1	3	5	0	0	0	2	4	3	6	3	0	0	1	0
Root	k__Bacteria	p__Actinobacteria	c__Actinobacteria	o__Actinomycetales	f__Corynebacteriaceae	g__Corynebacterium	s__	52	0	0	2	1	0	1	0	2	0	1	2	2	0	2	1	2	1	0	1	2	0	2	0	0	0	0	3	1	0	0	2	5	2	0	3	0	8	4	1	1
Root	k__Bacteria	p__Firmicutes	c__Clostridia	o__Clostridiales	f__Veillonellaceae	g__Pelosinus	s__	52	0	0	1	2	0	1	7	12	1	2	4	4	0	0	1	1	1	0	0	0	0	1	0	0	0	0	2	5	0	0	0	0	0	0	2	1	1	1	0	2
Root	k__Bacteria	p__Firmicutes	c__Bacilli	o__Bacillales	f__Planococcaceae	g__	s__	51	2	0	0	0	0	0	1	1	0	0	0	3	1	1	0	0	0	0	2	1	2	0	0	0	0	0	1	1	0	0	0	0	9	18	1	0	0	0	4	3
Root	k__Bacteria	p__Firmicutes	c__Clostridia	o__Clostridiales	f__Clostridiaceae	g__Clostridium	s__celatum	51	4	4	0	0	8	7	0	0	0	0	0	0	1	2	0	0	0	0	0	0	3	0	7	6	1	0	0	0	2	5	0	0	1	0	0	0	0	0	0	0
Root	k__Bacteria	p__Proteobacteria	c__Gammaproteobacteria	o__Alteromonadales	f__125ds10	g__	s__	51	0	0	0	0	0	0	0	0	0	0	0	0	0	0	0	0	0	0	0	0	0	0	0	0	0	0	25	26	0	0	0	0	0	0	0	0	0	0	0	0
Root	k__Bacteria	p__Firmicutes	c__Clostridia	o__Clostridiales	f__Ruminococcaceae	g__Ruminococcus	s__callidus	50	0	0	0	0	0	0	0	0	0	1	1	1	0	1	1	4	4	4	2	3	0	0	0	0	0	0	0	0	0	0	0	0	5	5	5	6	0	0	6	1
Root	k__Bacteria	p__Proteobacteria	c__Betaproteobacteria	o__Burkholderiales	f__Alcaligenaceae	g__Brackiella	s__oedipodis	50	0	1	1	0	1	0	26	20	1	0	0	0	0	0	0	0	0	0	0	0	0	0	0	0	0	0	0	0	0	0	0	0	0	0	0	0	0	0	0	0
Root	k__Bacteria	p__Firmicutes	c__Clostridia	o__Clostridiales	f__Dehalobacteriaceae	g__Dehalobacterium	s__	49	0	0	1	0	2	0	0	0	1	0	0	4	4	1	0	0	2	2	0	0	0	0	15	5	0	0	0	0	2	3	1	1	1	0	2	0	1	1	0	0
Root	k__Bacteria	p__Firmicutes	c__Clostridia	o__Clostridiales	f__Lachnospiraceae	g__Clostridium	s__fimetarium	49	2	0	2	1	1	2	6	6	0	0	1	1	3	0	0	1	0	1	1	0	1	0	0	0	0	0	3	1	0	0	0	0	3	1	4	2	2	2	1	1
Root	k__Bacteria	p__Firmicutes	c__Clostridia	o__Clostridiales	f__Ruminococcaceae	g__Anaerotruncus	s__	48	1	1	0	1	1	0	1	1	0	2	2	2	3	1	0	0	2	1	1	2	0	0	8	5	0	0	0	0	5	7	0	0	0	0	0	0	1	0	0	0
Root	k__Bacteria	p__Firmicutes	c__Bacilli	o__Lactobacillales	f__Streptococcaceae	g__Streptococcus	s__infantis	47	0	0	2	1	0	0	1	0	0	0	0	0	1	1	1	2	0	1	1	1	0	0	0	0	0	0	0	0	0	0	1	1	12	11	1	1	1	1	1	5
Root	k__Bacteria	p__Firmicutes	c__Clostridia	o__Clostridiales	f__Lachnospiraceae	g__Pseudobutyrivibrio	s__	44	2	0	2	5	0	1	3	1	1	1	2	1	1	0	0	0	0	1	1	0	0	0	2	3	0	2	1	0	3	1	1	2	3	3	0	1	0	0	0	0
Root	k__Bacteria	p__Proteobacteria	c__Gammaproteobacteria	o__Pasteurellales	f__Pasteurellaceae	g__Aggregatibacter	s__	44	0	2	1	0	0	0	0	0	0	0	0	1	0	0	0	1	0	0	0	0	1	2	2	0	3	4	2	0	2	0	8	5	1	1	1	2	3	1	1	0
Root	k__Bacteria	p__Bacteroidetes	c__Bacteroidia	o__Bacteroidales	f__RF16	g__	s__	43	1	2	0	1	5	3	0	0	2	2	0	3	4	3	0	0	3	0	3	3	0	0	0	1	0	0	0	0	1	0	0	0	2	0	3	1	0	0	0	0
Root	k__Bacteria	p__Bacteroidetes	c__Flavobacteriia	o__Flavobacteriales	f__Flavobacteriaceae	g__Sufflavibacter	s__maritimus	43	2	5	6	11	0	2	1	0	2	0	3	0	0	0	0	0	1	1	4	1	0	0	0	3	0	0	0	0	0	0	0	0	0	1	0	0	0	0	0	0
Root	k__Bacteria	p__Firmicutes	c__Erysipelotrichi	o__Erysipelotrichales	f__Erysipelotrichaceae	g__Sharpea	s__	41	0	0	0	0	0	0	0	0	0	0	0	0	0	0	0	0	0	0	0	0	0	0	0	0	0	0	0	0	0	1	10	6	8	5	0	0	0	0	6	5
Root	k__Bacteria	p__Proteobacteria	c__Gammaproteobacteria	o__Enterobacteriales	f__Enterobacteriaceae	g__Gluconacetobacter	s__	41	0	0	0	0	0	0	0	0	0	0	0	0	0	0	0	0	0	0	0	0	0	0	0	0	0	0	18	23	0	0	0	0	0	0	0	0	0	0	0	0
Root	k__Bacteria	p__Actinobacteria	c__Actinobacteria	o__Bifidobacteriales	f__Bifidobacteriaceae	g__Bifidobacterium	s__pseudolongum	40	0	0	0	0	2	0	2	0	0	0	2	1	0	2	0	1	0	2	0	2	0	0	0	0	0	0	1	2	0	0	8	6	1	2	0	0	4	1	0	1
Root	k__Bacteria	p__Bacteroidetes	c__Bacteroidia	o__Bacteroidales	f__Porphyromonadaceae	g__Porphyromonas	s__endodontalis	40	3	2	0	1	3	3	0	0	0	0	0	0	0	2	0	0	0	1	0	2	3	1	2	2	0	2	2	3	3	1	1	1	1	0	0	0	0	1	0	0
Root	k__Bacteria	p__Firmicutes	c__Bacilli	o__Lactobacillales	f__Streptococcaceae	g__Streptococcus	s__luteciae	40	0	0	0	0	0	0	0	0	0	0	0	0	0	0	0	0	0	0	0	0	0	0	0	0	0	0	0	0	0	0	0	0	18	8	1	1	0	1	8	3
Root	k__Bacteria	p__Bacteroidetes	c__Flavobacteriia	o__Flavobacteriales	f__Cryomorphaceae	g__	s__	39	2	0	3	2	0	1	1	2	1	0	0	4	1	0	0	0	1	1	0	1	1	0	0	2	1	1	2	2	0	2	0	2	1	1	0	0	1	1	1	1
Root	k__Bacteria	p__Proteobacteria	c__Gammaproteobacteria	o__Enterobacteriales	f__Enterobacteriaceae	g__Dickeya	s__	39	0	0	0	0	0	0	0	0	0	0	0	0	0	0	0	0	0	0	0	0	0	0	0	0	0	0	14	25	0	0	0	0	0	0	0	0	0	0	0	0
Root	k__Bacteria	p__Firmicutes	c__Clostridia	o__Clostridiales	f__Lachnospiraceae	g__Coprococcus	s__catus	38	0	0	0	0	0	0	0	0	5	3	7	8	0	0	0	1	0	0	0	0	0	0	0	0	0	0	0	0	0	0	0	0	9	4	0	0	0	0	0	1
Root	k__Bacteria	p__Firmicutes	c__Clostridia	o__Clostridiales	f__[Tissierellaceae]	g__GW-34	s__	38	0	1	0	0	1	0	7	1	1	1	2	0	0	0	0	1	0	1	1	0	1	0	0	0	1	0	6	8	0	0	0	0	1	2	0	1	0	1	0	0
Root	k__Bacteria	p__Proteobacteria	c__Betaproteobacteria	o__Burkholderiales	f__Burkholderiaceae	g__	s__	38	0	1	0	0	1	3	4	2	6	1	0	4	1	0	0	0	0	0	0	0	1	2	1	0	3	5	1	0	0	0	0	0	0	0	1	0	0	0	1	0
Root	k__Bacteria	p__Proteobacteria	c__Gammaproteobacteria	o__Enterobacteriales	f__Enterobacteriaceae	g__Xenorhabdus	s__bovienii	38	0	0	0	0	0	0	0	0	0	0	0	0	1	0	0	0	0	0	0	0	0	0	0	0	0	0	17	17	3	0	0	0	0	0	0	0	0	0	0	0
Root	k__Archaea	p__Euryarchaeota	c__Thermoplasmata	o__E2	f__[Methanomassiliicoccaceae]	g__Methanomassiliicoccus	s__	37	0	0	0	0	0	0	0	0	0	0	0	0	0	0	0	0	0	0	0	0	0	0	9	10	0	0	0	0	2	6	0	0	0	5	0	0	1	4	0	0
Root	k__Bacteria	p__Firmicutes	c__Erysipelotrichi	o__Erysipelotrichales	f__Erysipelotrichaceae	g__Clostridium	s__cocleatum	37	1	0	0	0	1	2	2	1	0	0	0	0	0	0	0	0	0	0	0	0	0	1	0	0	0	0	4	9	0	0	0	0	4	2	0	0	2	2	2	4
Root	k__Bacteria	p__Proteobacteria	c__Betaproteobacteria	o__Nitrosomonadales	f__Nitrosomonadaceae	g__	s__	37	0	1	0	0	1	1	2	2	3	2	1	0	0	0	0	0	0	0	0	0	1	5	0	0	2	2	2	0	0	0	2	1	1	3	0	0	3	1	0	1
Root	k__Bacteria	p__Proteobacteria	c__Betaproteobacteria	o__Rhodocyclales	f__Rhodocyclaceae	g__C39	s__	37	0	0	0	0	0	0	0	0	0	2	4	2	0	0	0	0	0	0	0	0	0	0	0	0	0	0	0	0	0	1	0	0	9	4	0	0	0	0	10	5
Root	k__Bacteria	p__Actinobacteria	c__OPB41	o__	f__	g__	s__	35	1	0	1	2	2	1	1	3	3	0	1	1	0	0	0	0	0	0	0	0	0	0	1	0	1	0	3	2	0	1	0	2	1	0	2	1	2	1	0	2
Root	k__Bacteria	p__Firmicutes	c__Bacilli	o__Lactobacillales	f__Streptococcaceae	g__	s__	35	1	2	0	0	0	1	1	0	1	1	0	1	0	0	0	1	1	1	0	1	0	0	0	1	1	0	4	7	0	0	2	1	0	0	1	1	4	0	0	1
Root	k__Bacteria	p__Firmicutes	c__Clostridia	o__Clostridiales	f__[Tissierellaceae]	g__Sedimentibacter	s__	35	2	2	14	11	2	3	0	0	0	0	0	0	0	0	0	0	0	0	0	0	0	0	0	0	0	0	0	0	1	0	0	0	0	0	0	0	0	0	0	0
Root	k__Bacteria	p__Proteobacteria	c__Betaproteobacteria	o__Burkholderiales	f__Comamonadaceae	g__Ramlibacter	s__	35	0	2	0	0	2	3	4	2	1	0	0	0	0	0	0	0	0	0	0	0	5	3	1	0	4	3	2	0	0	0	1	1	0	0	0	1	0	0	0	0
Root	k__Bacteria	p__Firmicutes	c__Bacilli	o__Gemellales	f__	g__	s__	34	4	1	1	0	0	0	0	1	0	1	0	0	0	0	1	0	2	2	0	1	0	0	0	1	0	0	5	5	0	0	1	0	2	1	1	1	0	1	2	0
Root	k__Bacteria	p__Firmicutes	c__Clostridia	o__Clostridiales	f__Lachnospiraceae	g__Epulopiscium	s__	34	1	0	2	0	0	1	2	4	1	0	1	2	1	0	0	0	0	0	0	1	0	0	3	1	0	0	3	3	0	0	1	2	2	2	0	0	1	0	0	0
Root	k__Bacteria	p__Firmicutes	c__Clostridia	o__SHA-98	f__	g__	s__	34	0	0	0	0	0	0	1	0	0	0	0	0	0	0	0	0	0	0	0	0	0	0	6	8	0	0	0	0	6	8	0	0	1	0	1	2	1	0	0	0
Root	k__Bacteria	p__Proteobacteria	c__Gammaproteobacteria	o__Enterobacteriales	f__Enterobacteriaceae	g__Enterobacter	s__pyrinus	34	0	0	0	0	0	0	0	0	0	0	0	0	0	0	0	0	0	0	0	0	0	0	1	0	0	0	15	17	0	0	0	0	0	0	0	0	1	0	0	0
Root	k__Bacteria	p__Proteobacteria	c__Betaproteobacteria	o__Burkholderiales	f__Comamonadaceae	g__Limnohabitans	s__	33	0	0	0	0	1	0	0	1	2	2	1	1	3	0	0	0	1	0	1	0	4	0	0	0	4	8	1	0	0	0	0	0	0	0	0	1	0	1	1	0
Root	k__Bacteria	p__Proteobacteria	c__Betaproteobacteria	o__Procabacteriales	f__Procabacteriaceae	g__	s__	33	0	1	0	0	2	0	0	1	0	1	0	0	0	0	0	0	0	0	0	1	9	4	0	0	3	4	1	0	0	0	2	2	0	0	0	0	1	1	0	0
Root	k__Bacteria	p__Proteobacteria	c__Betaproteobacteria	o__Rhodocyclales	f__Rhodocyclaceae	g__	s__	33	3	0	2	1	1	0	0	1	3	1	3	2	0	2	0	0	0	0	0	1	0	2	0	0	2	2	1	0	0	0	2	0	0	0	0	0	0	1	2	1
Root	k__Bacteria	p__Firmicutes	c__Erysipelotrichi	o__Erysipelotrichales	f__Erysipelotrichaceae	g__Catenibacterium	s__mitsuokai	32	0	0	0	0	0	0	0	0	0	0	0	0	0	0	0	0	0	0	0	0	0	0	0	0	0	0	0	0	0	0	4	4	3	5	0	0	0	0	5	11
Root	k__Bacteria	p__Lentisphaerae	c__[Lentisphaeria]	o__Victivallales	f__Victivallaceae	g__Victivallis	s__vadensis	32	6	4	2	5	1	1	0	0	1	2	0	0	0	0	0	0	0	0	0	0	0	0	4	4	0	0	0	0	1	1	0	0	0	0	0	0	0	0	0	0
Root	k__Bacteria	p__Firmicutes	c__Clostridia	o__Clostridiales	f__Caldicoprobacteraceae	g__Caldicoprobacter	s__	31	0	0	1	1	1	1	1	1	2	1	1	2	4	1	0	2	0	1	1	0	0	0	1	1	0	0	0	0	0	2	0	0	1	2	2	0	0	0	0	1
Root	k__Bacteria	p__Proteobacteria	c__Betaproteobacteria	o__Thiobacterales	f__	g__	s__	31	1	1	0	0	0	1	2	0	0	1	1	1	0	0	0	0	0	0	2	0	1	1	0	0	1	1	1	0	0	0	1	0	3	4	1	2	2	1	2	0
Root	k__Bacteria	p__Proteobacteria	c__Gammaproteobacteria	o__Enterobacteriales	f__Enterobacteriaceae	g__Enterobacter	s__arachidis	30	0	0	0	0	0	0	0	0	0	0	0	0	0	0	0	0	0	0	0	0	0	0	0	0	0	0	17	12	0	0	1	0	0	0	0	0	0	0	0	0
Root	k__Bacteria	p__Firmicutes	c__Bacilli	o__Gemellales	f__Gemellaceae	g__Gemella	s__	29	0	0	0	0	0	0	0	0	1	0	2	1	2	0	3	1	0	1	0	0	0	0	1	1	0	0	0	0	0	1	1	0	1	6	2	4	0	0	1	0
Root	k__Bacteria	p__Firmicutes	c__Clostridia	o__Clostridiales	f__Veillonellaceae	g__Acidaminococcus	s__	29	1	4	0	1	0	0	7	9	1	0	1	0	0	0	0	0	0	0	0	0	0	0	0	0	0	0	0	2	0	0	0	0	0	0	1	1	0	1	0	0
Root	k__Bacteria	p__Firmicutes	c__Clostridia	o__Clostridiales	f__[Tissierellaceae]	g__Peptoniphilus	s__	29	0	0	1	1	2	3	5	1	2	1	1	1	1	0	0	0	0	0	1	0	0	0	0	1	0	0	1	1	0	0	0	1	1	0	2	0	0	1	1	0
Root	k__Bacteria	p__Firmicutes	c__Clostridia	o__Clostridiales	f__Clostridiaceae	g__Clostridium	s__intestinale	28	0	1	0	0	1	0	1	5	1	0	1	0	0	2	0	0	0	1	1	1	0	1	2	3	1	0	0	2	1	1	0	0	0	0	0	0	0	0	0	2
Root	k__Bacteria	p__Proteobacteria	c__Gammaproteobacteria	o__Aeromonadales	f__Succinivibrionaceae	g__Succinivibrio	s__	28	2	3	1	0	0	0	7	8	1	2	0	0	0	0	0	1	0	0	0	1	0	0	0	0	0	0	0	0	0	0	0	0	0	0	2	0	0	0	0	0
Root	k__Bacteria	p__Proteobacteria	c__Gammaproteobacteria	o__Vibrionales	f__Pseudoalteromonadaceae	g__Pseudoalteromonas	s__porphyrae	28	0	0	0	0	0	0	0	0	0	0	0	0	0	0	0	0	0	0	0	0	0	0	0	0	0	0	13	15	0	0	0	0	0	0	0	0	0	0	0	0
Root	k__Bacteria	p__Actinobacteria	c__Actinobacteria	o__Actinomycetales	f__Microbacteriaceae	g__	s__	27	1	0	0	0	1	0	0	0	1	0	1	1	1	0	0	0	1	0	1	1	1	0	0	0	0	0	1	0	0	2	3	1	4	0	2	1	1	2	0	0
Root	k__Bacteria	p__Actinobacteria	c__Actinobacteria	o__Bifidobacteriales	f__Bifidobacteriaceae	g__Bifidobacterium	s__animalis	27	0	0	0	0	0	0	0	2	0	0	0	0	0	0	0	0	0	0	0	0	0	0	0	0	0	0	11	13	0	0	0	0	0	0	1	0	0	0	0	0
Root	k__Bacteria	p__Firmicutes	c__Bacilli	o__Bacillales	f__Bacillaceae	g__Bacillus	s__coahuilensis	27	0	3	0	0	1	0	0	1	0	0	0	0	0	0	0	0	0	0	5	4	0	0	2	0	0	0	1	5	0	0	0	0	1	1	1	1	0	0	0	1
Root	k__Bacteria	p__Firmicutes	c__Bacilli	o__Bacillales	f__Bacillaceae	g__Bacillus	s__ginsengihumi	26	2	1	0	0	0	1	1	0	0	0	0	0	0	0	0	0	0	2	0	5	0	0	0	1	0	1	2	2	0	0	2	2	1	0	2	1	0	0	0	0
Root	k__Bacteria	p__Firmicutes	c__Clostridia	o__	f__	g__	s__	23	0	0	0	0	0	0	0	0	0	0	0	0	1	0	0	0	0	0	0	0	0	0	9	4	0	0	0	0	2	3	0	0	1	0	0	0	0	2	1	0
Root	k__Bacteria	p__Firmicutes	c__Erysipelotrichi	o__Erysipelotrichales	f__Erysipelotrichaceae	g__RFN20	s__	23	0	0	1	1	0	1	0	0	1	0	0	0	1	0	0	1	0	0	0	0	0	0	1	0	0	0	2	3	0	0	4	4	1	2	0	0	0	0	0	0
Root	k__Bacteria	p__Proteobacteria	c__Gammaproteobacteria	o__Pasteurellales	f__Pasteurellaceae	g__Actinobacillus	s__parahaemolyticus	23	0	0	0	0	0	1	2	0	1	0	0	1	0	0	1	0	0	0	0	0	0	1	1	0	1	3	1	0	0	1	0	3	2	0	1	3	0	0	0	0
Root	k__Bacteria	p__Proteobacteria	c__Gammaproteobacteria	o__Pasteurellales	f__Pasteurellaceae	g__Mannheimia	s__	23	1	1	0	0	0	0	0	0	2	0	1	0	0	0	0	0	0	0	0	0	1	0	0	0	2	3	1	0	0	1	2	6	0	0	1	0	0	1	0	0
Root	k__Bacteria	p__Firmicutes	c__Bacilli	o__Bacillales	f__Planococcaceae	g__Lysinibacillus	s__	22	2	2	0	0	0	0	0	0	0	0	0	0	0	0	0	0	0	1	2	1	0	0	0	0	0	0	2	1	0	0	1	0	1	2	2	0	0	0	3	2
Root	k__Bacteria	p__Firmicutes	c__Bacilli	o__Lactobacillales	f__Streptococcaceae	g__Streptococcus	s__equi	22	0	0	0	0	0	0	0	0	0	0	0	0	0	0	0	0	0	0	0	1	0	0	0	0	0	0	0	0	0	0	0	0	9	6	0	0	1	0	3	2
Root	k__Bacteria	p__Firmicutes	c__Clostridia	o__Clostridiales	f__Peptococcaceae	g__rc4-4	s__	22	1	0	1	0	0	0	0	0	0	0	0	0	0	0	0	2	0	0	1	0	0	0	3	1	0	0	0	0	2	1	1	6	0	0	0	2	0	0	0	1
Root	k__Bacteria	p__Firmicutes	c__Clostridia	o__Clostridiales	f__Lachnospiraceae	g__Robinsoniella	s__peoriensis	21	2	1	1	1	2	0	0	0	0	0	0	0	1	0	0	2	0	0	0	0	0	0	1	0	0	0	4	4	0	1	0	0	0	0	1	0	0	0	0	0
Root	k__Bacteria	p__Proteobacteria	c__Betaproteobacteria	o__A21b	f__EB1003	g__	s__	21	0	0	1	0	0	1	3	3	2	1	1	0	0	0	0	0	0	0	0	0	0	0	1	0	0	1	0	1	0	0	1	1	1	1	0	0	0	1	1	0
Root	k__Bacteria	p__Bacteroidetes	c__Bacteroidia	o__Bacteroidales	f__BA008	g__	s__	20	1	1	0	0	0	3	7	0	0	0	0	0	0	1	0	0	0	0	0	0	0	0	0	0	0	0	1	2	0	0	0	0	0	0	2	0	0	2	0	0
Root	k__Bacteria	p__Firmicutes	c__Bacilli	o__Lactobacillales	f__Aerococcaceae	g__Facklamia	s__	20	0	0	3	0	2	0	0	0	0	0	1	0	0	0	0	0	0	0	2	1	0	0	2	0	0	0	0	1	0	0	2	1	0	2	0	1	1	0	0	1
Root	k__Bacteria	p__Firmicutes	c__Erysipelotrichi	o__Erysipelotrichales	f__Erysipelotrichaceae	g__[Eubacterium]	s__	20	0	0	0	0	0	0	0	0	0	0	0	0	1	0	0	0	1	0	0	1	0	0	0	0	0	0	1	0	0	0	2	2	3	2	2	0	1	0	1	3
Root	k__Bacteria	p__Fusobacteria	c__Fusobacteriia	o__Fusobacteriales	f__Fusobacteriaceae	g__Fusobacterium	s__	20	0	0	0	1	0	0	0	4	0	0	0	0	0	0	0	0	0	0	0	0	0	0	2	0	0	0	0	4	0	0	2	4	0	0	0	0	0	0	1	2
Root	k__Bacteria	p__Actinobacteria	c__Coriobacteriia	o__Coriobacteriales	f__Coriobacteriaceae	g__Coriobacterium	s__	19	0	0	1	0	0	0	5	3	0	1	1	0	1	0	0	0	0	0	0	0	0	0	1	0	0	1	0	0	0	0	0	1	2	1	0	0	0	0	0	1
Root	k__Bacteria	p__Proteobacteria	c__Deltaproteobacteria	o__Desulfovibrionales	f__Desulfovibrionaceae	g__Desulfovibrio	s__vulgaris	19	1	1	1	1	1	2	2	0	2	1	1	1	0	0	0	0	0	0	0	0	0	0	2	1	0	0	0	0	1	0	0	0	0	0	0	1	0	0	0	0
Root	k__Bacteria	p__Firmicutes	c__Clostridia	o__Clostridiales	f__Clostridiaceae	g__Clostridium	s__butyricum	18	0	0	0	0	1	0	1	0	0	0	0	0	0	0	0	0	1	1	2	4	0	0	0	2	0	0	0	0	0	0	0	0	3	1	0	0	0	0	0	2
Root	k__Bacteria	p__Bacteroidetes	c__Flavobacteriia	o__Flavobacteriales	f__Flavobacteriaceae	g__	s__	17	0	0	1	1	0	0	0	0	0	2	0	1	2	0	0	0	0	0	0	0	0	0	1	1	0	0	0	3	1	0	0	2	0	1	0	0	1	0	0	0
Root	k__Bacteria	p__Proteobacteria	c__Betaproteobacteria	o__Burkholderiales	f__Comamonadaceae	g__Hylemonella	s__	17	1	0	0	1	0	0	0	1	0	1	2	1	0	0	0	0	0	0	0	0	1	1	0	1	1	0	0	0	0	0	0	3	0	1	0	0	1	1	0	0
Root	k__Bacteria	p__Proteobacteria	c__Betaproteobacteria	o__MWH-UniP1	f__	g__	s__	17	0	1	0	0	0	0	0	1	0	1	2	2	0	0	0	0	0	0	2	0	1	1	0	0	0	1	2	1	0	0	1	0	0	0	0	1	0	0	0	0
Root	k__Bacteria	p__Proteobacteria	c__Betaproteobacteria	o__Methylophilales	f__Methylophilaceae	g__	s__	17	0	0	1	3	3	2	0	0	0	1	1	1	1	0	0	0	0	1	0	1	0	1	0	0	1	0	0	0	0	0	0	0	0	0	0	0	0	0	0	0
Root	k__Bacteria	p__Proteobacteria	c__Gammaproteobacteria	o__Enterobacteriales	f__Enterobacteriaceae	g__Trabulsiella	s__farmeri	17	0	0	0	0	0	0	0	0	0	0	0	0	0	0	0	0	0	0	0	0	0	0	0	0	0	0	6	10	1	0	0	0	0	0	0	0	0	0	0	0
Root	k__Bacteria	p__Bacteroidetes	c__Bacteroidia	o__Bacteroidales	f__Bacteroidaceae	g__BF311	s__	16	0	0	1	0	2	0	1	0	0	1	1	0	0	1	0	0	0	0	0	0	0	0	0	0	0	0	0	0	0	0	0	0	3	2	0	1	0	0	2	1
Root	k__Bacteria	p__Firmicutes	c__Bacilli	o__Lactobacillales	f__	g__	s__	16	0	0	0	1	1	0	0	0	0	0	0	0	0	0	0	0	0	0	1	1	0	0	0	0	0	0	5	3	0	0	1	0	1	0	0	0	0	1	0	1
Root	k__Bacteria	p__Proteobacteria	c__Betaproteobacteria	o__MND1	f__	g__	s__	16	0	0	0	0	0	0	0	1	0	0	0	1	1	0	0	0	0	0	0	0	0	0	0	0	3	5	0	0	0	0	2	0	0	0	0	0	0	2	1	0
Root	k__Bacteria	p__TM7	c__TM7-3	o__	f__	g__	s__	16	0	0	0	2	2	0	0	0	0	0	0	2	1	0	0	0	0	0	0	0	0	0	0	0	0	1	1	0	1	0	0	0	1	0	2	0	2	0	0	1
Root	k__Bacteria	p__Actinobacteria	c__Actinobacteria	o__Actinomycetales	f__Micrococcaceae	g__	s__	15	1	0	2	0	0	1	0	1	0	0	0	1	0	0	1	0	0	1	1	0	0	0	1	1	0	0	0	0	0	0	0	0	0	2	0	0	0	1	1	0
Root	k__Bacteria	p__Actinobacteria	c__Actinobacteria	o__Bifidobacteriales	f__Bifidobacteriaceae	g__Bifidobacterium	s__breve	15	1	1	0	3	0	0	0	0	0	0	0	0	0	0	0	0	0	0	0	2	0	0	0	0	1	0	0	0	0	0	0	1	0	1	0	0	3	2	0	0
Root	k__Bacteria	p__Firmicutes	c__Clostridia	o__Clostridiales	f__Veillonellaceae	g__Succinispira	s__mobilis	15	0	1	4	2	0	0	0	0	0	0	0	0	0	0	0	0	0	0	0	0	0	0	0	0	0	0	0	0	0	0	0	0	0	0	0	0	5	3	0	0
Root	k__Bacteria	p__Proteobacteria	c__Betaproteobacteria	o__Burkholderiales	f__Oxalobacteraceae	g__Janthinobacterium	s__lividum	15	0	0	0	0	1	1	0	0	0	3	4	2	0	1	0	0	0	0	0	0	0	0	1	0	1	0	0	1	0	0	0	0	0	0	0	0	0	0	0	0
Root	k__Bacteria	p__Proteobacteria	c__Betaproteobacteria	o__Methylophilales	f__Methylophilaceae	g__Methylobacillus	s__	15	0	0	0	1	0	0	1	0	0	0	1	0	0	1	0	0	0	0	0	1	1	0	0	0	2	2	0	0	0	0	0	0	0	0	0	0	3	2	0	0
Root	k__Bacteria	p__Proteobacteria	c__Gammaproteobacteria	o__Aeromonadales	f__Succinivibrionaceae	g__Succinatimonas	s__hippei	15	0	0	0	0	0	0	0	0	0	0	0	0	0	0	1	2	0	2	0	0	0	0	0	0	0	0	0	0	0	0	0	0	0	0	5	5	0	0	0	0
Root	k__Bacteria	p__Proteobacteria	c__Gammaproteobacteria	o__Pasteurellales	f__Pasteurellaceae	g__Actinobacillus	s__	15	0	0	0	0	0	0	0	0	0	0	0	0	0	0	0	0	0	0	0	0	1	0	0	0	0	2	4	4	0	0	1	1	0	1	1	0	0	0	0	0
Root	k__Bacteria	p__Verrucomicrobia	c__Verrucomicrobiae	o__Verrucomicrobiales	f__Verrucomicrobiaceae	g__	s__	15	0	0	0	3	1	0	0	0	1	0	2	0	0	0	0	0	0	0	0	0	0	0	4	1	0	0	0	0	0	1	0	0	0	0	0	1	0	1	0	0
Root	k__Bacteria	p__Actinobacteria	c__Actinobacteria	o__Actinomycetales	f__Micrococcaceae	g__Rothia	s__mucilaginosa	14	1	0	0	2	0	0	0	0	0	1	0	0	0	0	0	0	0	0	0	0	0	0	0	0	0	0	0	0	0	0	0	1	4	1	1	0	0	1	1	1
Root	k__Bacteria	p__Firmicutes	c__Clostridia	o__Clostridiales	f__Lachnospiraceae	g__Clostridium	s__colinum	14	0	1	0	1	1	1	0	1	1	1	0	0	1	0	0	1	0	0	1	1	0	0	0	0	0	0	0	0	0	1	0	0	0	0	1	0	0	1	0	0
Root	k__Bacteria	p__Proteobacteria	c__Alphaproteobacteria	o__Rhodospirillales	f__Rhodospirillaceae	g__	s__	14	0	0	0	0	0	0	0	1	0	0	0	0	0	0	0	0	0	0	0	0	3	3	0	0	4	2	1	0	0	0	0	0	0	0	0	0	0	0	0	0
Root	k__Bacteria	p__Proteobacteria	c__Betaproteobacteria	o__Hydrogenophilales	f__Hydrogenophilaceae	g__Thiobacillus	s__	14	0	0	0	0	1	2	0	0	1	0	1	1	1	0	0	0	0	0	0	0	0	2	0	0	1	0	1	0	0	0	0	0	0	0	0	0	1	2	0	0
Root	k__Bacteria	p__Elusimicrobia	c__Elusimicrobia	o__Elusimicrobiales	f__Elusimicrobiaceae	g__	s__	13	0	0	0	0	0	0	0	0	0	0	0	0	0	0	0	0	0	0	0	0	0	0	6	0	0	0	0	0	2	3	0	0	0	0	0	0	0	0	2	0
Root	k__Bacteria	p__Firmicutes	c__Clostridia	o__Clostridiales	f__Eubacteriaceae	g__Anaerofustis	s__	13	0	0	0	0	0	0	0	0	0	2	0	0	0	0	0	0	0	0	0	0	0	0	0	0	0	0	6	1	0	2	0	0	0	0	1	0	0	0	0	1
Root	k__Bacteria	p__Firmicutes	c__Clostridia	o__Clostridiales	f__Peptostreptococcaceae	g__Clostridium	s__ruminantium	13	1	0	0	0	1	1	0	2	0	0	0	0	0	1	0	0	0	0	0	0	0	0	0	0	0	0	0	0	0	0	1	0	1	1	0	0	2	0	2	0
Root	k__Bacteria	p__Firmicutes	c__Clostridia	o__Clostridiales	f__Peptostreptococcaceae	g__Tepidibacter	s__	13	0	0	0	0	0	0	0	0	0	0	0	0	0	0	0	0	0	0	0	0	0	0	0	1	1	0	3	0	0	0	0	0	5	2	0	1	0	0	0	0
Root	k__Bacteria	p__Proteobacteria	c__Gammaproteobacteria	o__Pseudomonadales	f__Moraxellaceae	g__	s__	13	0	0	0	0	0	0	0	0	0	0	0	0	0	0	0	0	0	0	0	0	0	0	0	0	0	0	4	9	0	0	0	0	0	0	0	0	0	0	0	0
Root	k__Bacteria	p__Firmicutes	c__Bacilli	o__Bacillales	f__Paenibacillaceae	g__Paenibacillus	s__	12	1	0	0	0	0	1	0	0	1	0	0	0	1	0	0	0	0	0	1	0	0	0	0	1	2	0	0	0	0	1	0	1	0	0	1	1	0	0	0	0
Root	k__Bacteria	p__Proteobacteria	c__Betaproteobacteria	o__Neisseriales	f__Neisseriaceae	g__	s__	12	0	0	0	0	0	0	2	0	0	0	0	1	0	0	0	0	0	0	0	1	2	1	0	0	0	0	0	2	0	0	0	1	0	0	0	0	1	1	0	0
Root	k__Bacteria	p__Synergistetes	c__Synergistia	o__Synergistales	f__Anaerobaculaceae	g__Anaerobaculum	s__	12	0	2	0	0	1	0	0	0	1	0	0	0	0	0	0	0	0	1	0	1	0	0	1	0	0	0	0	0	0	0	0	2	2	1	0	0	0	0	0	0
Root	k__Bacteria	p__Verrucomicrobia	c__Verrucomicrobiae	o__Verrucomicrobiales	f__Verrucomicrobiaceae	g__Akkermansia	s__	12	0	1	0	1	0	0	0	0	0	0	0	0	0	0	0	0	0	0	0	0	0	0	3	3	0	0	0	0	1	3	0	0	0	0	0	0	0	0	0	0
Root	k__Bacteria	p__Bacteroidetes	c__Bacteroidia	o__Bacteroidales	f__p-2534-18B5	g__	s__	11	0	0	2	2	1	1	0	0	0	0	0	0	0	0	0	0	3	1	0	1	0	0	0	0	0	0	0	0	0	0	0	0	0	0	0	0	0	0	0	0
Root	k__Bacteria	p__Firmicutes	c__Bacilli	o__Bacillales	f__Paenibacillaceae	g__	s__	11	0	0	0	0	0	0	0	0	0	0	0	0	0	0	1	0	0	1	0	0	0	0	0	0	0	0	0	1	0	0	0	0	6	1	0	0	0	0	0	1
Root	k__Bacteria	p__Firmicutes	c__Bacilli	o__Bacillales	f__Staphylococcaceae	g__Staphylococcus	s__aureus	11	0	0	1	0	0	0	0	0	0	1	0	0	0	0	0	0	0	0	0	0	0	1	0	0	0	0	0	1	0	0	1	2	1	2	0	1	0	0	0	0
Root	k__Bacteria	p__Firmicutes	c__Clostridia	o__Clostridiales	f__Clostridiaceae	g__Caloramator	s__	11	0	0	1	1	1	0	0	1	0	1	1	1	0	0	1	0	0	0	0	1	0	0	0	0	0	0	1	0	0	0	0	1	0	0	0	0	0	0	0	0
Root	k__Bacteria	p__Firmicutes	c__Clostridia	o__Clostridiales	f__Gracilibacteraceae	g__Gracilibacter	s__	11	0	0	0	0	1	0	0	1	2	0	0	0	1	1	0	0	0	0	0	0	0	0	0	0	0	0	0	0	1	0	0	0	0	1	0	1	1	1	0	0
Root	k__Bacteria	p__Firmicutes	c__Clostridia	o__Clostridiales	f__Veillonellaceae	g__Selenomonas	s__	11	2	0	0	1	1	2	1	1	0	1	0	0	0	0	0	0	0	0	1	0	0	0	0	0	0	0	0	0	0	0	0	0	0	0	0	0	0	0	1	0
Root	k__Bacteria	p__Firmicutes	c__Clostridia	o__Clostridiales	f__[Acidaminobacteraceae]	g__WH1-8	s__	11	2	1	1	1	0	0	2	0	0	0	0	0	0	0	0	0	0	0	1	0	0	0	0	0	0	0	1	1	0	0	1	0	0	0	0	0	0	0	0	0
Root	k__Bacteria	p__Proteobacteria	c__Betaproteobacteria	o__Burkholderiales	f__Oxalobacteraceae	g__Massilia	s__aerolata	11	0	0	0	0	0	0	1	1	0	0	0	0	0	0	0	0	0	0	0	0	4	2	0	0	0	2	0	0	0	0	0	0	0	0	0	0	0	1	0	0
Root	k__Bacteria	p__Proteobacteria	c__Gammaproteobacteria	o__Enterobacteriales	f__Enterobacteriaceae	g__Samsonia	s__erythrinae	11	0	0	0	0	0	0	0	0	0	0	0	0	0	0	0	0	0	0	0	0	0	0	0	0	0	0	6	5	0	0	0	0	0	0	0	0	0	0	0	0
Root	k__Bacteria	p__Proteobacteria	c__Gammaproteobacteria	o__Enterobacteriales	f__Enterobacteriaceae	g__Yersinia	s__	11	0	0	0	0	0	0	0	0	0	0	0	0	0	0	0	0	0	0	1	0	0	0	3	0	0	0	2	4	1	0	0	0	0	0	0	0	0	0	0	0
Root	k__Bacteria	p__Actinobacteria	c__Actinobacteria	o__Actinomycetales	f__Propionibacteriaceae	g__	s__	10	0	0	1	0	0	0	0	0	0	0	0	1	0	0	0	0	1	0	0	0	0	0	0	0	0	0	1	0	0	0	2	2	1	0	0	1	0	0	0	0
Root	k__Bacteria	p__Bacteroidetes	c__Bacteroidia	o__Bacteroidales	f__[Barnesiellaceae]	g__Barnesiella	s__viscericola	10	0	0	0	0	0	1	1	1	0	0	1	2	1	0	0	0	1	1	0	1	0	0	0	0	0	0	0	0	0	0	0	0	0	0	0	0	0	0	0	0
Root	k__Bacteria	p__Firmicutes	c__Bacilli	o__Bacillales	f__Bacillaceae	g__Bacillus	s__humi	10	0	0	0	0	0	1	0	0	0	0	0	0	0	0	0	0	0	1	3	2	0	0	0	0	0	0	1	2	0	0	0	0	0	0	0	0	0	0	0	0
Root	k__Bacteria	p__Firmicutes	c__Bacilli	o__Lactobacillales	f__Lactobacillaceae	g__Lactobacillus	s__zeae	10	3	0	0	0	0	0	0	0	0	0	0	0	0	0	0	0	1	0	0	0	1	0	0	0	0	3	1	0	0	0	0	0	0	0	0	1	0	0	0	0
Root	k__Bacteria	p__Firmicutes	c__Clostridia	o__Clostridiales	f__Clostridiaceae	g__Clostridium	s__hiranonis	10	0	0	2	0	0	0	1	1	0	0	0	1	0	0	0	0	0	0	1	1	0	0	0	0	0	0	0	1	0	0	1	0	1	0	0	0	0	0	0	0
Root	k__Bacteria	p__Firmicutes	c__Clostridia	o__Clostridiales	f__Peptococcaceae	g__Desulfosporosinus	s__meridiei	10	0	2	1	1	0	1	0	0	0	0	0	0	0	0	0	0	0	1	1	0	0	0	0	1	0	0	0	0	0	0	0	0	0	0	1	1	0	0	0	0
Root	k__Bacteria	p__Actinobacteria	c__Actinobacteria	o__Actinomycetales	f__Pseudonocardiaceae	g__Prauserella	s__rugosa	9	0	0	0	0	0	0	0	1	0	0	0	1	0	0	0	0	0	0	0	0	0	0	0	0	0	0	1	0	0	0	1	0	1	1	0	0	0	1	0	2
Root	k__Bacteria	p__Actinobacteria	c__Coriobacteriia	o__Coriobacteriales	f__Coriobacteriaceae	g__Atopobium	s__	9	2	0	0	0	0	0	2	1	0	0	0	0	0	0	0	0	0	0	0	0	0	0	0	0	0	1	0	0	0	0	1	0	2	0	0	0	0	0	0	0
Root	k__Bacteria	p__Firmicutes	c__Bacilli	o__Lactobacillales	f__Enterococcaceae	g__	s__	9	0	0	0	0	0	0	0	0	0	0	1	0	0	0	0	0	0	0	0	0	0	0	0	0	0	0	4	3	0	0	0	0	0	1	0	0	0	0	0	0
Root	k__Bacteria	p__Firmicutes	c__Bacilli	o__Lactobacillales	f__Streptococcaceae	g__Streptococcus	s__minor	9	0	0	0	0	0	0	0	0	0	0	0	0	0	0	0	1	0	0	0	0	0	0	0	0	0	0	0	1	0	0	0	0	1	5	0	0	0	0	1	0
Root	k__Bacteria	p__Firmicutes	c__Clostridia	o__Clostridiales	f__Christensenellaceae	g__Christensenella	s__	9	0	0	0	0	0	0	0	0	2	1	0	0	2	1	0	0	0	1	0	0	0	0	0	0	0	0	0	0	0	0	2	0	0	0	0	0	0	0	0	0
Root	k__Bacteria	p__Firmicutes	c__Clostridia	o__Clostridiales	f__Clostridiaceae	g__Sarcina	s__	9	0	0	0	0	1	0	0	1	0	0	0	0	0	1	0	0	0	1	0	0	0	0	1	0	0	0	0	0	0	0	0	0	2	1	0	1	0	0	0	0
Root	k__Bacteria	p__Firmicutes	c__Clostridia	o__Clostridiales	f__Gracilibacteraceae	g__	s__	9	0	0	0	0	0	0	0	0	0	0	0	2	0	0	0	0	0	0	0	0	0	0	2	2	0	0	0	0	2	0	0	0	0	0	0	0	0	1	0	0
Root	k__Bacteria	p__Firmicutes	c__Clostridia	o__Clostridiales	f__[Mogibacteriaceae]	g__Anaerovorax	s__	9	0	0	0	1	0	1	0	0	0	0	1	1	0	0	0	0	0	0	0	0	0	0	0	0	0	0	1	1	0	1	1	1	0	0	0	0	0	0	0	0
Root	k__Bacteria	p__Proteobacteria	c__Gammaproteobacteria	o__	f__	g__	s__	9	0	0	0	0	0	0	0	0	0	0	0	0	0	0	0	0	0	0	1	1	3	0	0	0	3	1	0	0	0	0	0	0	0	0	0	0	0	0	0	0
Root	k__Bacteria	p__Proteobacteria	c__Gammaproteobacteria	o__Pseudomonadales	f__Pseudomonadaceae	g__	s__	9	0	0	0	0	0	0	0	0	0	0	0	0	0	0	0	0	0	0	0	0	0	0	0	0	0	0	5	4	0	0	0	0	0	0	0	0	0	0	0	0
Root	k__Bacteria	p__Proteobacteria	c__Zetaproteobacteria	o__Mariprofundales	f__Mariprofundaceae	g__Mariprofundus	s__	9	0	1	0	0	0	0	0	0	0	0	0	0	0	1	1	0	0	0	1	0	0	0	0	0	0	0	0	1	0	0	0	2	1	1	0	0	0	0	0	0
Root	k__Bacteria	p__Synergistetes	c__Synergistia	o__Synergistales	f__	g__	s__	9	0	0	0	0	0	0	0	0	1	0	0	2	0	0	1	1	0	0	0	0	0	0	0	1	0	0	0	0	0	0	0	0	0	0	0	3	0	0	0	0
Root	k__Bacteria	p__Actinobacteria	c__Actinobacteria	o__Actinomycetales	f__Microbacteriaceae	g__Microbacterium	s__	8	0	0	0	0	0	0	0	0	0	0	0	0	0	0	0	0	0	0	0	0	0	0	0	0	0	0	0	1	0	0	2	0	1	2	0	0	0	0	1	1
Root	k__Bacteria	p__Actinobacteria	c__Actinobacteria	o__Actinomycetales	f__Micrococcaceae	g__Nesterenkonia	s__	8	0	1	0	0	0	0	0	0	0	0	0	0	0	0	0	0	0	0	1	0	0	0	0	0	0	0	0	0	0	0	2	1	0	0	0	0	2	1	0	0
Root	k__Bacteria	p__Bacteroidetes	c__Bacteroidia	o__Bacteroidales	f__BS11	g__	s__	8	0	0	0	0	0	0	0	0	0	0	0	0	1	0	0	0	1	1	0	1	0	0	0	0	0	0	0	0	0	0	2	1	0	0	0	0	0	0	0	1
Root	k__Bacteria	p__Bacteroidetes	c__Bacteroidia	o__Bacteroidales	f__Rikenellaceae	g__AF12	s__	8	0	0	0	0	0	0	0	0	0	0	0	0	1	1	0	0	2	0	1	0	0	0	0	0	0	0	0	0	1	1	1	0	0	0	0	0	0	0	0	0
Root	k__Bacteria	p__Firmicutes	c__Bacilli	o__Lactobacillales	f__Lactobacillaceae	g__Lactobacillus	s__iners	8	0	2	0	0	1	0	0	0	0	0	0	0	0	0	0	0	0	0	0	0	0	0	0	0	0	0	1	4	0	0	0	0	0	0	0	0	0	0	0	0
Root	k__Bacteria	p__Firmicutes	c__Clostridia	o__Clostridiales	f__Clostridiaceae	g__Clostridium	s__gasigenes	8	0	0	0	0	3	0	0	0	0	0	0	0	0	0	0	0	0	0	0	0	0	0	0	0	1	0	0	0	0	0	0	0	1	1	0	1	0	0	1	0
Root	k__Bacteria	p__Firmicutes	c__Clostridia	o__Clostridiales	f__Peptostreptococcaceae	g__Peptostreptococcus	s__anaerobius	8	0	0	0	0	0	0	0	0	0	0	0	0	0	0	0	0	0	0	1	0	0	0	0	0	0	0	1	0	0	0	1	2	1	1	1	0	0	0	0	0
Root	k__Bacteria	p__Firmicutes	c__Erysipelotrichi	o__Erysipelotrichales	f__Erysipelotrichaceae	g__Clostridium	s__saccharogumia	8	0	1	0	1	0	0	1	0	0	0	0	0	0	0	0	0	0	0	0	0	0	0	1	1	0	0	0	1	0	0	0	0	0	0	0	0	1	0	1	0
Root	k__Bacteria	p__Proteobacteria	c__Betaproteobacteria	o__Burkholderiales	f__Comamonadaceae	g__Hydrogenophaga	s__	8	0	0	0	0	0	0	2	4	0	0	0	1	0	0	0	0	0	0	0	0	0	0	0	0	0	0	0	0	0	0	1	0	0	0	0	0	0	0	0	0
Root	k__Bacteria	p__Proteobacteria	c__Gammaproteobacteria	o__Enterobacteriales	f__Enterobacteriaceae	g__Pantoea	s__agglomerans	8	0	0	0	0	0	0	0	0	0	0	0	0	0	0	0	0	0	0	0	0	0	0	0	0	0	0	0	8	0	0	0	0	0	0	0	0	0	0	0	0
Root	k__Bacteria	p__Proteobacteria	c__Gammaproteobacteria	o__Enterobacteriales	f__Enterobacteriaceae	g__Salmonella	s__	8	0	0	0	0	0	0	0	0	0	0	0	0	0	0	0	0	0	0	0	0	0	0	0	0	0	0	2	6	0	0	0	0	0	0	0	0	0	0	0	0
Root	k__Bacteria	p__Tenericutes	c__Mollicutes	o__Acholeplasmatales	f__Acholeplasmataceae	g__Acholeplasma	s__	8	0	0	0	0	0	0	0	0	0	0	0	0	0	0	0	0	0	0	0	0	1	0	0	0	0	0	1	3	0	0	0	0	0	1	0	0	0	0	2	0
Root	k__Bacteria	p__Tenericutes	c__Mollicutes	o__Anaeroplasmatales	f__Anaeroplasmataceae	g__Anaeroplasma	s__	8	0	0	0	0	0	0	0	0	0	0	0	1	0	0	0	0	0	0	0	0	0	0	2	2	0	0	0	0	1	0	1	0	1	0	0	0	0	0	0	0
Root	k__Bacteria	p__Tenericutes	c__RF3	o__ML615J-28	f__	g__	s__	8	0	0	0	0	0	0	0	0	0	0	0	0	0	0	0	0	0	0	0	0	0	0	2	0	0	0	0	0	2	1	0	0	0	1	0	0	0	2	0	0
Root	k__Bacteria	p__Actinobacteria	c__Actinobacteria	o__Actinomycetales	f__Actinomycetaceae	g__Mobiluncus	s__	7	0	0	0	1	0	0	0	0	1	0	0	0	2	0	0	0	0	0	0	0	0	0	0	0	0	0	0	0	0	0	1	0	0	0	1	0	0	0	1	0
Root	k__Bacteria	p__Actinobacteria	c__Actinobacteria	o__Bifidobacteriales	f__Bifidobacteriaceae	g__Alloscardovia	s__	7	0	0	0	0	0	0	0	0	0	0	0	0	0	0	0	0	0	0	0	0	0	0	0	0	0	0	0	6	0	0	0	1	0	0	0	0	0	0	0	0
Root	k__Bacteria	p__Chlorobi	c__Chlorobia	o__Chlorobiales	f__Chlorobiaceae	g__Chlorobium	s__chlorochromatii	7	0	1	0	0	0	0	0	0	1	0	0	0	0	0	0	0	1	0	0	1	0	0	0	0	0	0	0	1	0	0	1	0	0	0	1	0	0	0	0	0
Root	k__Bacteria	p__Chlorobi	c__Ignavibacteria	o__Ignavibacteriales	f__	g__	s__	7	0	1	0	0	0	1	0	0	0	0	0	0	1	0	0	0	0	0	0	0	0	1	0	0	1	0	0	0	0	0	0	1	0	1	0	0	0	0	0	0
Root	k__Bacteria	p__Chloroflexi	c__Chloroflexi	o__[Roseiflexales]	f__[Roseiflexaceae]	g__Roseiflexus	s__	7	0	0	0	0	0	0	1	1	0	0	0	0	0	1	0	0	0	0	0	1	0	0	0	0	0	0	2	0	0	0	0	0	1	0	0	0	0	0	0	0
Root	k__Bacteria	p__Firmicutes	c__Bacilli	o__Lactobacillales	f__Streptococcaceae	g__Streptococcus	s__anginosus	7	0	0	1	1	0	0	0	0	0	0	0	1	0	0	0	0	0	0	0	0	0	0	0	0	0	0	0	0	0	0	1	1	2	0	0	0	0	0	0	0
Root	k__Bacteria	p__Proteobacteria	c__Gammaproteobacteria	o__Alteromonadales	f__Colwelliaceae	g__	s__	7	0	0	0	0	0	0	0	0	0	0	0	0	0	0	0	0	0	0	0	0	0	0	0	0	0	0	1	6	0	0	0	0	0	0	0	0	0	0	0	0
Root	k__Bacteria	p__Synergistetes	c__Synergistia	o__Synergistales	f__Synergistaceae	g__Synergistes	s__	7	0	0	0	0	0	0	0	0	0	0	0	0	0	0	0	0	0	0	0	0	0	0	0	0	0	0	0	0	0	0	3	3	1	0	0	0	0	0	0	0
Root	k__Bacteria	p__Actinobacteria	c__Acidimicrobiia	o__Acidimicrobiales	f__SC3-41	g__	s__	6	1	0	0	0	0	0	1	0	0	1	0	1	0	1	0	0	0	0	0	0	0	0	0	0	0	0	0	0	0	0	0	0	0	0	0	0	0	0	0	1
Root	k__Bacteria	p__Actinobacteria	c__Acidimicrobiia	o__Acidimicrobiales	f__ZA3409c	g__	s__	6	0	1	0	0	0	0	0	0	0	0	1	1	0	0	0	0	2	0	0	0	0	0	0	0	0	0	0	0	0	0	0	0	0	0	0	0	0	0	1	0
Root	k__Bacteria	p__Actinobacteria	c__Nitriliruptoria	o__Euzebyales	f__Euzebyaceae	g__Euzebya	s__	6	1	0	0	0	0	1	0	0	1	0	1	0	0	0	0	0	0	0	0	0	0	0	0	1	0	0	0	0	0	0	0	0	0	0	0	0	0	1	0	0
Root	k__Bacteria	p__Bacteroidetes	c__	o__	f__	g__	s__	6	0	1	1	0	0	0	1	0	0	0	0	0	0	0	0	0	0	0	0	0	0	0	0	1	0	0	0	0	0	2	0	0	0	0	0	0	0	0	0	0
Root	k__Bacteria	p__Bacteroidetes	c__Bacteroidia	o__Bacteroidales	f__Marinilabiaceae	g__Ruminofilibacter	s__xylanolyticum	6	0	0	0	0	0	0	0	0	0	0	0	0	0	0	0	0	0	0	0	0	0	0	0	0	0	0	0	1	1	2	0	0	0	1	0	0	0	0	1	0
Root	k__Bacteria	p__Bacteroidetes	c__Flavobacteriia	o__Flavobacteriales	f__Flavobacteriaceae	g__Kordia	s__	6	0	0	0	0	0	0	0	0	0	0	0	0	0	0	0	0	0	0	2	0	0	0	0	0	0	0	0	0	0	0	3	0	0	0	0	0	1	0	0	0
Root	k__Bacteria	p__Chlorobi	c__OPB56	o__	f__	g__	s__	6	0	0	0	0	0	0	0	0	0	0	4	0	0	0	0	0	0	0	0	0	0	0	0	0	0	0	0	0	0	0	0	0	1	0	0	0	0	0	0	1
Root	k__Bacteria	p__Firmicutes	c__Bacilli	o__Bacillales	f__Planococcaceae	g__Rummeliibacillus	s__	6	1	0	0	1	0	0	0	0	0	0	0	1	0	0	0	0	0	0	0	0	0	0	0	0	0	0	0	0	0	1	1	1	0	0	0	0	0	0	0	0
Root	k__Bacteria	p__Firmicutes	c__Clostridia	o__Clostridiales	f__EtOH8	g__	s__	6	0	0	0	0	0	0	0	0	0	0	0	0	0	0	0	0	0	0	0	0	0	0	0	2	0	0	0	0	0	3	0	0	0	0	1	0	0	0	0	0
Root	k__Bacteria	p__Firmicutes	c__Clostridia	o__Clostridiales	f__Peptostreptococcaceae	g__Clostridium	s__maritimum	6	0	1	0	0	1	1	0	0	0	0	0	0	0	0	2	0	0	0	0	0	0	0	1	0	0	0	0	0	0	0	0	0	0	0	0	0	0	0	0	0
Root	k__Bacteria	p__Firmicutes	c__Clostridia	o__Clostridiales	f__[Tissierellaceae]	g__WAL_1855D	s__	6	0	0	0	0	0	2	0	0	4	0	0	0	0	0	0	0	0	0	0	0	0	0	0	0	0	0	0	0	0	0	0	0	0	0	0	0	0	0	0	0
Root	k__Bacteria	p__Firmicutes	c__Erysipelotrichi	o__Erysipelotrichales	f__Erysipelotrichaceae	g__Bulleidia	s__moorei	6	0	0	0	0	0	0	0	0	0	0	0	0	0	2	0	0	0	0	0	0	0	0	0	0	1	0	0	0	0	0	0	0	0	0	0	0	0	0	2	1
Root	k__Bacteria	p__Proteobacteria	c__Betaproteobacteria	o__Burkholderiales	f__Comamonadaceae	g__Thiomonas	s__	6	0	0	1	0	0	0	0	0	1	0	0	0	0	0	0	0	0	0	1	1	0	0	0	0	0	0	0	0	0	0	0	0	0	0	1	0	1	0	0	0
Root	k__Bacteria	p__Proteobacteria	c__Betaproteobacteria	o__Rhodocyclales	f__Rhodocyclaceae	g__Dechloromonas	s__	6	0	0	0	0	1	0	0	1	0	0	0	0	0	0	0	0	0	0	0	1	0	0	0	0	2	0	0	0	0	0	0	0	0	0	0	0	0	0	1	0
Root	k__Bacteria	p__Actinobacteria	c__Actinobacteria	o__Actinomycetales	f__Nocardioidaceae	g__Friedmanniella	s__	5	0	0	0	0	0	0	0	0	0	0	0	1	0	0	0	0	0	0	0	2	0	0	0	0	0	0	0	0	0	0	0	1	0	0	0	0	1	0	0	0
Root	k__Bacteria	p__Actinobacteria	c__Actinobacteria	o__Actinomycetales	f__Nocardiopsaceae	g__	s__	5	0	0	0	0	0	0	0	1	0	0	0	1	0	0	0	0	0	0	0	0	0	0	0	0	0	0	0	0	0	0	1	0	0	2	0	0	0	0	0	0
Root	k__Bacteria	p__Actinobacteria	c__Actinobacteria	o__Actinomycetales	f__Propionibacteriaceae	g__Propionibacterium	s__acnes	5	0	0	0	0	0	0	0	0	0	0	1	0	0	0	0	0	0	0	0	0	0	0	0	0	0	0	1	1	0	0	0	0	0	0	0	1	0	1	0	0
Root	k__Bacteria	p__Cyanobacteria	c__Gloeobacterophycideae	o__Gloeobacterales	f__Gloeobacteraceae	g__Gloeobacter	s__violaceus	5	0	0	0	1	0	0	0	0	0	0	0	0	0	0	0	0	0	0	0	0	1	0	0	0	0	0	0	0	0	0	1	0	0	0	0	0	0	1	1	0
Root	k__Bacteria	p__Firmicutes	c__Bacilli	o__Bacillales	f__Bacillaceae	g__Bacillus	s__asahii	5	0	1	0	0	0	0	0	0	0	0	0	0	0	0	0	0	1	0	0	0	0	0	0	0	0	0	0	1	0	0	0	0	2	0	0	0	0	0	0	0
Root	k__Bacteria	p__Firmicutes	c__Bacilli	o__Bacillales	f__Bacillaceae	g__Bacillus	s__muralis	5	0	0	0	0	0	0	0	0	0	0	0	0	0	0	0	2	0	0	0	0	0	0	0	1	0	0	0	0	0	0	0	2	0	0	0	0	0	0	0	0
Root	k__Bacteria	p__Firmicutes	c__Bacilli	o__Lactobacillales	f__Lactobacillaceae	g__Lactobacillus	s__reuteri	5	0	0	0	0	0	0	0	0	0	0	0	0	0	0	0	0	0	0	0	0	0	0	0	0	0	0	0	0	0	0	2	2	0	1	0	0	0	0	0	0
Root	k__Bacteria	p__Firmicutes	c__Bacilli	o__Lactobacillales	f__Leuconostocaceae	g__Leuconostoc	s__	5	0	0	0	0	0	0	0	0	0	0	0	0	0	0	2	0	0	0	0	0	1	0	1	1	0	0	0	0	0	0	0	0	0	0	0	0	0	0	0	0
Root	k__Bacteria	p__Firmicutes	c__Clostridia	o__Clostridiales	f__Lachnospiraceae	g__Hespellia	s__stercorisuis	5	0	0	0	0	1	0	0	0	0	0	0	0	0	1	0	0	0	0	1	1	0	0	1	0	0	0	0	0	0	0	0	0	0	0	0	0	0	0	0	0
Root	k__Bacteria	p__Firmicutes	c__Clostridia	o__Clostridiales	f__Peptococcaceae	g__Desulfotomaculum	s__	5	0	0	0	1	0	0	0	0	0	0	2	0	0	0	0	0	0	0	0	0	0	0	0	0	0	0	0	0	0	0	0	0	1	1	0	0	0	0	0	0
Root	k__Bacteria	p__Firmicutes	c__Clostridia	o__Clostridiales	f__Peptostreptococcaceae	g__Filifactor	s__	5	1	0	0	0	1	0	0	0	0	0	0	0	0	1	0	1	1	0	0	0	0	0	0	0	0	0	0	0	0	0	0	0	0	0	0	0	0	0	0	0
Root	k__Bacteria	p__Firmicutes	c__Clostridia	o__Clostridiales	f__[Tissierellaceae]	g__	s__	5	0	0	0	0	0	0	0	0	0	0	0	1	0	0	0	0	0	0	0	0	0	0	0	0	0	0	0	0	1	0	0	0	0	3	0	0	0	0	0	0
Root	k__Bacteria	p__Gemmatimonadetes	c__Gemm-2	o__	f__	g__	s__	5	0	0	0	0	0	0	0	1	0	1	0	0	0	0	0	0	0	0	0	0	0	0	0	0	0	0	1	1	0	0	1	0	0	0	0	0	0	0	0	0
Root	k__Bacteria	p__OP9	c__JS1	o__BA021	f__	g__	s__	5	0	0	0	0	0	0	0	0	0	0	1	0	0	0	0	0	0	0	0	0	0	0	0	0	0	0	0	0	0	0	0	0	0	0	0	0	2	2	0	0
Root	k__Bacteria	p__OP9	c__OPB46	o__OPB72	f__TIBD11	g__	s__	5	0	0	0	0	0	0	0	0	0	0	0	0	0	0	0	1	0	0	0	0	0	0	3	1	0	0	0	0	0	0	0	0	0	0	0	0	0	0	0	0
Root	k__Bacteria	p__Proteobacteria	c__Betaproteobacteria	o__Burkholderiales	f__Burkholderiaceae	g__Burkholderia	s__	5	0	0	0	0	0	0	1	1	0	0	0	2	0	0	0	0	0	0	0	0	0	0	0	0	0	0	0	0	0	0	0	0	0	0	0	0	0	1	0	0
Root	k__Bacteria	p__Proteobacteria	c__Betaproteobacteria	o__Burkholderiales	f__Oxalobacteraceae	g__Cupriavidus	s__	5	0	0	3	0	0	0	1	1	0	0	0	0	0	0	0	0	0	0	0	0	0	0	0	0	0	0	0	0	0	0	0	0	0	0	0	0	0	0	0	0
Root	k__Bacteria	p__Proteobacteria	c__Betaproteobacteria	o__Rhodocyclales	f__Rhodocyclaceae	g__Dok59	s__	5	0	0	0	1	0	1	0	0	0	0	0	1	0	0	0	0	0	0	0	0	1	0	0	0	0	0	0	0	0	0	0	0	0	0	1	0	0	0	0	0
Root	k__Bacteria	p__Proteobacteria	c__Epsilonproteobacteria	o__Campylobacterales	f__Campylobacteraceae	g__Campylobacter	s__	5	2	0	0	0	0	1	0	0	0	0	0	0	0	0	0	0	0	0	0	0	2	0	0	0	0	0	0	0	0	0	0	0	0	0	0	0	0	0	0	0
Root	k__Bacteria	p__Proteobacteria	c__Gammaproteobacteria	o__Chromatiales	f__Ectothiorhodospiraceae	g__Thioalkalivibrio	s__	5	0	0	0	0	0	0	0	0	0	3	1	0	1	0	0	0	0	0	0	0	0	0	0	0	0	0	0	0	0	0	0	0	0	0	0	0	0	0	0	0
Root	k__Bacteria	p__Proteobacteria	c__Gammaproteobacteria	o__Enterobacteriales	f__Enterobacteriaceae	g__Citrobacter	s__freundii	5	0	0	0	0	0	0	0	0	0	0	0	0	0	0	0	0	0	0	0	0	0	0	1	0	0	0	3	1	0	0	0	0	0	0	0	0	0	0	0	0
Root	k__Bacteria	p__Proteobacteria	c__Gammaproteobacteria	o__Pasteurellales	f__Pasteurellaceae	g__Haemophilus	s__parasuis	5	0	0	0	0	0	0	0	0	0	0	0	0	0	0	0	0	0	0	0	0	0	0	1	0	0	0	2	1	0	0	1	0	0	0	0	0	0	0	0	0
Root	k__Bacteria	p__Actinobacteria	c__Acidimicrobiia	o__Acidimicrobiales	f__C111	g__	s__	4	0	0	1	0	0	0	1	0	0	1	0	0	0	0	1	0	0	0	0	0	0	0	0	0	0	0	0	0	0	0	0	0	0	0	0	0	0	0	0	0
Root	k__Bacteria	p__Actinobacteria	c__Actinobacteria	o__Actinomycetales	f__	g__	s__	4	0	0	0	0	0	0	0	0	0	0	0	0	0	0	0	0	0	0	0	0	0	0	0	0	0	0	0	0	0	0	0	1	0	1	0	0	0	2	0	0
Root	k__Bacteria	p__Actinobacteria	c__Actinobacteria	o__Actinomycetales	f__Pseudonocardiaceae	g__	s__	4	0	0	0	0	0	0	0	0	0	0	0	0	0	0	0	0	0	0	0	0	0	0	1	0	0	0	0	0	0	0	1	2	0	0	0	0	0	0	0	0
Root	k__Bacteria	p__Actinobacteria	c__Actinobacteria	o__Actinomycetales	f__Streptomycetaceae	g__Streptomyces	s__	4	0	0	0	0	0	0	0	0	0	0	0	0	0	0	0	0	0	0	0	0	1	0	0	0	0	0	1	0	0	0	0	1	0	0	0	1	0	0	0	0
Root	k__Bacteria	p__Bacteroidetes	c__Flavobacteriia	o__Flavobacteriales	f__Flavobacteriaceae	g__Polaribacter	s__	4	0	0	0	1	1	0	0	0	0	0	0	0	0	0	0	0	0	0	0	0	0	0	1	0	0	0	0	0	0	1	0	0	0	0	0	0	0	0	0	0
Root	k__Bacteria	p__Firmicutes	c__Bacilli	o__Bacillales	f__Bacillaceae	g__Bacillus	s__flexus	4	0	0	0	1	0	0	0	0	0	1	0	0	0	0	0	0	0	0	0	0	0	0	0	0	0	0	1	0	0	0	0	0	0	1	0	0	0	0	0	0
Root	k__Bacteria	p__Firmicutes	c__Bacilli	o__Lactobacillales	f__Carnobacteriaceae	g__Trichococcus	s__	4	0	0	0	0	0	0	0	0	0	0	0	0	0	0	0	0	1	0	0	0	1	0	0	0	0	0	0	1	0	0	0	0	1	0	0	0	0	0	0	0
Root	k__Bacteria	p__Firmicutes	c__Bacilli	o__Lactobacillales	f__Lactobacillaceae	g__Lactobacillus	s__coleohominis	4	1	0	0	0	0	0	0	0	0	0	0	0	0	0	0	0	0	0	0	0	0	0	0	0	0	0	0	1	0	0	2	0	0	0	0	0	0	0	0	0
Root	k__Bacteria	p__Firmicutes	c__Clostridia	o__Clostridiales	f__Clostridiaceae	g__Alkaliphilus	s__	4	0	0	0	0	0	0	0	0	0	0	0	0	0	0	0	0	0	0	0	0	0	0	0	0	0	0	0	0	0	0	0	0	2	0	0	1	0	0	1	0
Root	k__Bacteria	p__Firmicutes	c__Clostridia	o__Clostridiales	f__Clostridiaceae	g__Alkaliphilus	s__transvaalensis	4	0	0	0	0	0	0	0	0	0	0	0	0	0	0	0	0	0	0	0	0	0	0	1	0	0	1	0	0	0	0	0	0	0	0	1	1	0	0	0	0
Root	k__Bacteria	p__Firmicutes	c__Clostridia	o__Clostridiales	f__Dehalobacteriaceae	g__	s__	4	1	1	0	0	0	0	0	0	0	0	0	0	0	0	0	0	0	0	0	0	0	0	1	1	0	0	0	0	0	0	0	0	0	0	0	0	0	0	0	0
Root	k__Bacteria	p__Firmicutes	c__Clostridia	o__Clostridiales	f__Eubacteriaceae	g__Pseudoramibacter_Eubacterium	s__	4	0	0	0	0	0	0	0	0	0	0	0	0	0	0	0	0	0	0	0	0	0	0	0	0	0	0	0	1	0	0	1	0	0	0	0	0	1	0	1	0
Root	k__Bacteria	p__Firmicutes	c__Clostridia	o__Clostridiales	f__Heliobacteriaceae	g__	s__	4	0	0	1	0	0	0	0	0	0	0	0	0	0	0	0	0	0	0	2	0	0	0	0	0	0	0	0	0	0	0	0	0	0	0	0	0	1	0	0	0
Root	k__Bacteria	p__Firmicutes	c__Clostridia	o__Clostridiales	f__Peptococcaceae	g__Desulfosporosinus	s__	4	0	0	1	2	0	0	0	0	0	0	0	0	0	0	0	0	0	0	0	0	0	0	0	0	0	0	0	0	0	1	0	0	0	0	0	0	0	0	0	0
Root	k__Bacteria	p__Firmicutes	c__Clostridia	o__Clostridiales	f__Veillonellaceae	g__Thermosinus	s__	4	0	1	0	0	0	0	0	0	1	0	0	0	0	0	1	0	0	0	0	0	0	0	0	0	0	0	0	0	1	0	0	0	0	0	0	0	0	0	0	0
Root	k__Bacteria	p__Firmicutes	c__Clostridia	o__Thermoanaerobacterales	f__	g__	s__	4	1	0	0	0	0	0	0	0	0	0	0	0	0	0	0	0	0	0	0	1	0	0	1	0	0	0	0	0	0	0	0	0	1	0	0	0	0	0	0	0
Root	k__Bacteria	p__Fusobacteria	c__Fusobacteriia	o__Fusobacteriales	f__Leptotrichiaceae	g__Leptotrichia	s__	4	2	0	0	0	0	0	0	0	0	0	0	0	0	0	0	0	0	0	0	0	0	0	0	0	0	0	1	0	0	0	0	0	1	0	0	0	0	0	0	0
Root	k__Bacteria	p__Gemmatimonadetes	c__Gemm-6	o__	f__	g__	s__	4	0	1	0	0	0	0	0	0	0	0	0	0	0	0	1	0	0	0	0	0	0	0	0	1	0	0	0	0	0	0	0	1	0	0	0	0	0	0	0	0
Root	k__Bacteria	p__Proteobacteria	c__Betaproteobacteria	o__Rhodocyclales	f__Rhodocyclaceae	g__Sulfuritalea	s__	4	0	0	0	0	0	0	0	0	0	0	0	1	0	0	0	0	0	0	0	0	0	0	0	0	0	0	0	0	0	0	0	0	0	0	0	0	0	0	2	1
Root	k__Bacteria	p__Proteobacteria	c__Deltaproteobacteria	o__Desulfovibrionales	f__Desulfovibrionaceae	g__Desulfovibrio	s__D168	4	0	1	0	2	0	0	0	0	0	0	0	0	0	0	0	0	0	0	0	0	0	0	0	0	0	0	0	0	1	0	0	0	0	0	0	0	0	0	0	0
Root	k__Bacteria	p__Proteobacteria	c__Gammaproteobacteria	o__Enterobacteriales	f__Enterobacteriaceae	g__Cronobacter	s__sakazakii	4	0	0	0	0	0	0	0	0	0	0	0	0	0	0	0	0	0	0	0	0	0	0	0	0	0	0	4	0	0	0	0	0	0	0	0	0	0	0	0	0
Root	k__Bacteria	p__Proteobacteria	c__Gammaproteobacteria	o__Enterobacteriales	f__Enterobacteriaceae	g__Edwardsiella	s__	4	0	0	0	0	0	0	0	0	0	0	0	0	0	0	0	0	0	0	0	0	0	0	0	0	0	0	1	3	0	0	0	0	0	0	0	0	0	0	0	0
Root	k__Bacteria	p__Proteobacteria	c__Gammaproteobacteria	o__Enterobacteriales	f__Enterobacteriaceae	g__Enterobacter	s__cowanii	4	0	0	0	0	0	0	0	0	0	0	0	0	0	0	0	0	0	0	0	0	0	0	0	0	0	0	2	2	0	0	0	0	0	0	0	0	0	0	0	0
Root	k__Bacteria	p__Proteobacteria	c__Gammaproteobacteria	o__Enterobacteriales	f__Enterobacteriaceae	g__Escherichia	s__blattae	4	0	0	0	0	0	0	0	0	0	0	0	0	0	0	0	0	0	0	0	0	0	0	0	0	0	0	1	3	0	0	0	0	0	0	0	0	0	0	0	0
Root	k__Bacteria	p__Proteobacteria	c__Gammaproteobacteria	o__Enterobacteriales	f__Enterobacteriaceae	g__Kleidoceria	s__schneideri	4	0	0	0	0	0	0	0	0	0	0	0	0	0	0	0	0	0	0	0	0	0	0	2	1	0	0	0	0	0	1	0	0	0	0	0	0	0	0	0	0
Root	k__Bacteria	p__Proteobacteria	c__Gammaproteobacteria	o__Enterobacteriales	f__Enterobacteriaceae	g__Salmonella	s__enterica	4	0	0	0	0	0	0	0	0	0	0	0	0	0	0	0	0	0	0	0	0	0	0	0	0	0	0	1	1	0	0	0	0	0	0	0	0	0	0	1	1
Root	k__Bacteria	p__Proteobacteria	c__Gammaproteobacteria	o__Pasteurellales	f__	g__	s__	4	0	0	0	0	0	0	0	0	0	0	0	0	0	0	0	0	0	0	0	0	0	0	0	0	0	0	2	2	0	0	0	0	0	0	0	0	0	0	0	0
Root	k__Bacteria	p__Proteobacteria	c__Gammaproteobacteria	o__Vibrionales	f__Pseudoalteromonadaceae	g__	s__	4	0	0	0	0	0	0	0	0	0	0	0	0	0	0	0	0	0	0	0	0	0	0	0	0	0	0	2	2	0	0	0	0	0	0	0	0	0	0	0	0
Root	k__Bacteria	p__Proteobacteria	c__Gammaproteobacteria	o__Xanthomonadales	f__Xanthomonadaceae	g__	s__	4	0	0	0	0	0	0	0	0	0	0	0	0	0	0	0	0	0	0	0	0	0	0	0	0	0	0	1	2	0	0	0	0	0	0	1	0	0	0	0	0
Root	k__Bacteria	p__SAR406	c__AB16	o__Arctic96B-7	f__A714017	g__	s__	4	0	0	1	0	0	0	0	0	0	0	1	0	0	0	0	0	0	0	1	0	0	1	0	0	0	0	0	0	0	0	0	0	0	0	0	0	0	0	0	0
Root	k__Bacteria	p__Spirochaetes	c__Spirochaetes	o__Spirochaetales	f__Spirochaetaceae	g__Treponema	s__	4	0	0	0	0	0	0	0	0	0	0	0	0	0	0	1	0	0	0	0	0	0	0	0	0	0	0	0	0	0	0	0	0	1	1	0	0	0	0	1	0
Root	k__Bacteria	p__TM7	c__TM7-3	o__CW040	f__	g__	s__	4	0	0	0	0	0	0	1	0	0	0	0	0	0	0	0	1	0	0	0	0	0	0	0	0	0	0	0	0	0	0	0	0	0	0	0	2	0	0	0	0
Root	k__Bacteria	p__TM7	c__TM7-3	o__CW040	f__F16	g__	s__	4	0	0	0	0	0	0	0	0	0	0	0	0	0	0	0	0	0	0	0	0	2	2	0	0	0	0	0	0	0	0	0	0	0	0	0	0	0	0	0	0
Root	k__Archaea	p__Euryarchaeota	c__Methanobacteria	o__Methanobacteriales	f__Methanobacteriaceae	g__Methanobacterium	s__	3	0	0	0	0	0	0	0	0	0	0	0	0	0	0	0	0	0	0	0	0	0	0	1	1	0	0	0	0	0	1	0	0	0	0	0	0	0	0	0	0
Root	k__Bacteria	p__Actinobacteria	c__Acidimicrobiia	o__Acidimicrobiales	f__	g__	s__	3	0	0	0	0	0	1	0	0	0	0	0	0	0	0	0	0	0	0	0	0	0	0	0	0	0	0	0	0	0	0	0	0	0	1	0	0	0	0	0	1
Root	k__Bacteria	p__Actinobacteria	c__Actinobacteria	o__Actinomycetales	f__ACK-M1	g__	s__	3	1	0	0	0	0	0	0	0	0	0	2	0	0	0	0	0	0	0	0	0	0	0	0	0	0	0	0	0	0	0	0	0	0	0	0	0	0	0	0	0
Root	k__Bacteria	p__Actinobacteria	c__Actinobacteria	o__Actinomycetales	f__Actinomycetaceae	g__	s__	3	0	0	0	0	0	0	0	0	1	0	0	0	0	0	0	0	0	0	0	0	0	0	0	0	0	2	0	0	0	0	0	0	0	0	0	0	0	0	0	0
Root	k__Bacteria	p__Actinobacteria	c__Actinobacteria	o__Actinomycetales	f__Sanguibacteraceae	g__	s__	3	0	0	0	0	0	0	0	0	0	0	0	0	0	1	0	0	0	0	0	1	0	0	0	0	0	0	0	0	0	0	0	1	0	0	0	0	0	0	0	0
Root	k__Bacteria	p__Actinobacteria	c__Actinobacteria	o__Bifidobacteriales	f__Bifidobacteriaceae	g__Gardnerella	s__	3	0	0	0	0	0	0	0	0	0	0	0	0	0	0	0	0	0	0	0	0	0	0	0	0	0	0	0	0	0	0	1	0	2	0	0	0	0	0	0	0
Root	k__Bacteria	p__Bacteroidetes	c__Bacteroidia	o__Bacteroidales	f__Prevotellaceae	g__Prevotella	s__nigrescens	3	0	0	0	0	0	0	0	0	0	0	0	0	0	0	0	0	0	0	0	0	0	0	2	0	0	0	0	0	0	0	0	0	1	0	0	0	0	0	0	0
Root	k__Bacteria	p__Bacteroidetes	c__Sphingobacteriia	o__Sphingobacteriales	f__Sphingobacteriaceae	g__	s__	3	0	0	0	0	1	0	0	0	0	0	0	0	0	0	0	0	0	0	1	0	0	0	0	0	0	1	0	0	0	0	0	0	0	0	0	0	0	0	0	0
Root	k__Bacteria	p__Bacteroidetes	c__Sphingobacteriia	o__Sphingobacteriales	f__Sphingobacteriaceae	g__Olivibacter	s__sitiensis	3	0	0	0	0	0	0	0	0	0	0	0	1	0	0	0	0	0	0	0	0	0	0	0	0	0	0	0	0	0	0	0	0	1	1	0	0	0	0	0	0
Root	k__Bacteria	p__Chloroflexi	c__Anaerolineae	o__SJA-15	f__	g__	s__	3	0	0	0	0	0	0	0	0	0	0	0	0	0	0	0	0	0	0	0	0	0	0	0	0	0	0	0	0	0	0	0	1	0	0	1	0	1	0	0	0
Root	k__Bacteria	p__Firmicutes	c__Bacilli	o__Lactobacillales	f__Aerococcaceae	g__Aerococcus	s__	3	0	0	0	0	0	0	0	0	0	0	0	0	0	0	0	0	0	1	0	0	0	0	0	0	0	0	0	0	0	0	0	2	0	0	0	0	0	0	0	0
Root	k__Bacteria	p__Firmicutes	c__Bacilli	o__Lactobacillales	f__Carnobacteriaceae	g__	s__	3	1	0	0	0	0	0	0	0	0	0	0	0	0	0	0	0	0	0	0	0	0	0	0	0	0	0	1	1	0	0	0	0	0	0	0	0	0	0	0	0
Root	k__Bacteria	p__Firmicutes	c__Bacilli	o__Lactobacillales	f__Enterococcaceae	g__Melissococcus	s__plutonius	3	1	0	0	0	0	0	0	0	0	0	0	0	0	0	0	0	0	0	0	0	0	0	0	0	0	0	0	1	0	0	0	0	0	1	0	0	0	0	0	0
Root	k__Bacteria	p__Firmicutes	c__Clostridia	o__Clostridiales	f__Clostridiaceae	g__Clostridium	s__acidurici	3	0	0	0	0	0	0	0	0	0	0	0	0	0	0	0	0	0	0	0	0	0	0	0	0	0	0	1	0	0	0	0	0	2	0	0	0	0	0	0	0
Root	k__Bacteria	p__Firmicutes	c__Clostridia	o__Clostridiales	f__Clostridiaceae	g__Clostridium	s__ljungdahlii	3	0	0	0	0	0	0	0	0	0	0	1	2	0	0	0	0	0	0	0	0	0	0	0	0	0	0	0	0	0	0	0	0	0	0	0	0	0	0	0	0
Root	k__Bacteria	p__Firmicutes	c__Clostridia	o__Clostridiales	f__Clostridiaceae	g__Clostridium	s__tetani	3	0	1	1	0	0	0	0	0	0	0	0	0	0	0	0	0	1	0	0	0	0	0	0	0	0	0	0	0	0	0	0	0	0	0	0	0	0	0	0	0
Root	k__Bacteria	p__Firmicutes	c__Clostridia	o__Clostridiales	f__Lachnospiraceae	g__Catonella	s__	3	0	0	0	0	0	0	0	0	0	0	0	0	0	1	0	0	0	1	0	0	0	0	0	0	0	0	0	0	0	0	0	0	0	0	1	0	0	0	0	0
Root	k__Bacteria	p__Firmicutes	c__Clostridia	o__Clostridiales	f__Peptococcaceae	g__Sporotomaculum	s__	3	0	0	0	0	0	0	0	0	0	0	0	0	2	1	0	0	0	0	0	0	0	0	0	0	0	0	0	0	0	0	0	0	0	0	0	0	0	0	0	0
Root	k__Bacteria	p__Firmicutes	c__Clostridia	o__Clostridiales	f__Peptostreptococcaceae	g__Clostridium	s__metallolevans	3	2	0	0	0	0	0	0	0	0	0	0	0	0	0	0	0	0	0	0	0	0	0	0	0	0	0	0	0	0	0	0	0	0	0	1	0	0	0	0	0
Root	k__Bacteria	p__Firmicutes	c__Clostridia	o__Clostridiales	f__Peptostreptococcaceae	g__Peptostreptococcus	s__	3	0	0	0	0	0	0	0	0	0	0	0	0	0	0	0	0	0	0	0	0	0	0	0	0	0	0	0	0	0	0	0	1	1	0	1	0	0	0	0	0
Root	k__Bacteria	p__Firmicutes	c__Clostridia	o__Clostridiales	f__Ruminococcaceae	g__Faecalibacterium	s__	3	0	0	0	0	1	0	0	1	0	0	0	0	0	1	0	0	0	0	0	0	0	0	0	0	0	0	0	0	0	0	0	0	0	0	0	0	0	0	0	0
Root	k__Bacteria	p__Firmicutes	c__Clostridia	o__Clostridiales	f__Ruminococcaceae	g__Sporobacter	s__termitidis	3	0	0	0	1	0	0	0	0	1	0	0	0	0	0	0	0	0	0	0	0	0	0	0	0	0	0	0	0	0	0	0	0	0	0	1	0	0	0	0	0
Root	k__Bacteria	p__Firmicutes	c__Clostridia	o__Clostridiales	f__[Tissierellaceae]	g__Anaerococcus	s__	3	0	0	0	0	0	0	0	0	0	0	0	0	0	0	0	0	0	0	0	0	0	0	0	2	0	0	0	0	0	0	0	0	0	0	0	0	1	0	0	0
Root	k__Bacteria	p__Firmicutes	c__Clostridia	o__Thermoanaerobacterales	f__Thermoanaerobacteraceae	g__Thermacetogenium	s__	3	0	0	0	0	0	0	0	0	0	0	1	0	0	0	0	0	0	0	0	0	0	0	0	0	0	0	0	0	0	0	0	1	0	0	0	0	0	0	0	1
Root	k__Bacteria	p__Firmicutes	c__Erysipelotrichi	o__Erysipelotrichales	f__Erysipelotrichaceae	g__gut	s__metagenome	3	0	0	0	0	0	0	0	0	1	0	0	0	0	1	0	0	0	0	0	0	0	0	0	0	0	0	0	0	0	0	0	0	0	1	0	0	0	0	0	0
Root	k__Bacteria	p__NKB19	c__	o__	f__	g__	s__	3	0	0	0	1	1	0	0	0	0	0	1	0	0	0	0	0	0	0	0	0	0	0	0	0	0	0	0	0	0	0	0	0	0	0	0	0	0	0	0	0
Root	k__Bacteria	p__Proteobacteria	c__Betaproteobacteria	o__Burkholderiales	f__Comamonadaceae	g__Acidovorax	s__	3	0	0	0	0	0	0	0	0	0	0	0	1	0	0	0	0	0	0	0	0	0	1	0	0	0	0	0	0	0	0	0	0	0	0	0	0	0	1	0	0
Root	k__Bacteria	p__Proteobacteria	c__Betaproteobacteria	o__Burkholderiales	f__Oxalobacteraceae	g__Janthinobacterium	s__	3	0	0	0	1	0	0	0	0	0	0	0	0	0	0	0	0	1	0	1	0	0	0	0	0	0	0	0	0	0	0	0	0	0	0	0	0	0	0	0	0
Root	k__Bacteria	p__Proteobacteria	c__Betaproteobacteria	o__Neisseriales	f__Neisseriaceae	g__Eikenella	s__	3	0	0	0	0	0	0	0	1	0	0	0	0	0	0	1	1	0	0	0	0	0	0	0	0	0	0	0	0	0	0	0	0	0	0	0	0	0	0	0	0
Root	k__Bacteria	p__Proteobacteria	c__Betaproteobacteria	o__Neisseriales	f__Neisseriaceae	g__Neisseria	s__	3	0	0	0	0	0	0	0	0	0	0	0	0	0	0	0	1	0	0	0	0	0	0	0	0	0	0	0	0	0	0	0	2	0	0	0	0	0	0	0	0
Root	k__Bacteria	p__Proteobacteria	c__Gammaproteobacteria	o__Alteromonadales	f__Idiomarinaceae	g__	s__	3	0	0	0	0	0	0	0	0	0	0	0	0	0	0	0	0	0	0	0	0	0	0	0	0	0	0	0	2	1	0	0	0	0	0	0	0	0	0	0	0
Root	k__Bacteria	p__Proteobacteria	c__Gammaproteobacteria	o__Alteromonadales	f__Shewanellaceae	g__Shewanella	s__benthica	3	0	0	0	0	0	0	0	0	0	0	0	0	0	0	0	0	0	0	0	0	0	0	0	0	0	0	3	0	0	0	0	0	0	0	0	0	0	0	0	0
Root	k__Bacteria	p__Proteobacteria	c__Gammaproteobacteria	o__Alteromonadales	f__[Chromatiaceae]	g__Alishewanella	s__	3	0	0	0	0	0	0	0	0	0	0	0	0	0	0	0	0	0	0	0	0	0	0	0	0	0	0	2	1	0	0	0	0	0	0	0	0	0	0	0	0
Root	k__Bacteria	p__Proteobacteria	c__Gammaproteobacteria	o__Enterobacteriales	f__Enterobacteriaceae	g__Cronobacter	s__turicensis	3	0	0	0	0	0	0	0	0	0	0	0	0	0	0	0	0	0	0	0	1	0	0	0	0	0	0	0	1	0	0	0	0	0	1	0	0	0	0	0	0
Root	k__Bacteria	p__Proteobacteria	c__Gammaproteobacteria	o__Enterobacteriales	f__Enterobacteriaceae	g__Enterobacter	s__	3	0	0	0	0	0	0	0	0	0	0	0	0	0	0	0	0	0	0	0	0	0	0	0	0	0	0	2	1	0	0	0	0	0	0	0	0	0	0	0	0
Root	k__Bacteria	p__Proteobacteria	c__Gammaproteobacteria	o__Enterobacteriales	f__Enterobacteriaceae	g__Erwinia	s__chrysanthemi	3	0	0	0	0	0	0	0	0	0	0	0	0	0	0	0	0	0	0	0	0	0	0	0	0	0	0	0	3	0	0	0	0	0	0	0	0	0	0	0	0
Root	k__Bacteria	p__Proteobacteria	c__Gammaproteobacteria	o__Enterobacteriales	f__Enterobacteriaceae	g__Erwinia	s__oleae	3	0	0	0	0	0	0	0	0	0	0	0	0	0	0	0	0	0	0	0	0	0	0	0	0	0	0	1	2	0	0	0	0	0	0	0	0	0	0	0	0
Root	k__Bacteria	p__Proteobacteria	c__Gammaproteobacteria	o__Enterobacteriales	f__Enterobacteriaceae	g__Morganella	s__morganii	3	0	0	0	0	0	0	0	0	0	0	0	0	0	0	0	0	0	0	0	0	0	0	0	0	0	0	0	0	0	0	0	0	0	0	0	0	2	0	1	0
Root	k__Bacteria	p__Proteobacteria	c__Gammaproteobacteria	o__Enterobacteriales	f__Enterobacteriaceae	g__Pragia	s__fontium	3	0	0	0	0	0	0	0	0	0	0	0	0	0	0	0	0	0	0	0	0	0	0	0	0	0	0	0	2	1	0	0	0	0	0	0	0	0	0	0	0
Root	k__Bacteria	p__Proteobacteria	c__Gammaproteobacteria	o__Enterobacteriales	f__Enterobacteriaceae	g__Proteus	s__	3	0	0	0	0	0	0	0	0	0	0	0	0	0	0	0	0	0	0	0	0	0	0	0	0	0	0	1	2	0	0	0	0	0	0	0	0	0	0	0	0
Root	k__Bacteria	p__Proteobacteria	c__Gammaproteobacteria	o__Enterobacteriales	f__Enterobacteriaceae	g__Providencia	s__	3	0	0	0	0	0	0	0	0	0	0	0	0	0	0	0	0	0	0	0	0	0	0	0	0	0	0	2	1	0	0	0	0	0	0	0	0	0	0	0	0
Root	k__Bacteria	p__Proteobacteria	c__Gammaproteobacteria	o__Xanthomonadales	f__Sinobacteraceae	g__	s__	3	0	0	0	0	0	0	0	0	0	0	0	0	0	0	0	0	0	0	0	0	0	0	0	0	0	0	1	1	0	0	0	0	0	0	0	0	1	0	0	0
Root	k__Bacteria	p__Spirochaetes	c__[Brachyspirae]	o__[Brachyspirales]	f__Brachyspiraceae	g__Brachyspira	s__	3	0	0	0	0	0	0	0	0	2	1	0	0	0	0	0	0	0	0	0	0	0	0	0	0	0	0	0	0	0	0	0	0	0	0	0	0	0	0	0	0
Root	k__Bacteria	p__TM6	c__SJA-4	o__	f__	g__	s__	3	0	0	0	0	1	0	0	0	0	0	0	1	0	0	0	0	0	1	0	0	0	0	0	0	0	0	0	0	0	0	0	0	0	0	0	0	0	0	0	0
Root	k__Bacteria	p__TM7	c__TM7-3	o__EW055	f__	g__	s__	3	0	0	0	0	1	0	0	0	0	0	0	0	1	0	0	0	0	0	0	0	0	0	0	0	0	0	0	0	0	0	0	0	0	0	0	0	0	0	0	1
Root	k__Bacteria	p__Tenericutes	c__CK-1C4-19	o__	f__	g__	s__	3	0	0	1	0	0	0	0	0	0	0	0	0	0	0	0	0	0	0	0	0	0	0	0	0	0	0	0	0	0	0	0	0	0	0	0	2	0	0	0	0
Root	k__Bacteria	p__Tenericutes	c__Mollicutes	o__Anaeroplasmatales	f__Anaeroplasmataceae	g__	s__	3	0	0	0	0	0	0	0	0	0	1	0	1	0	0	0	0	0	0	0	0	0	0	0	1	0	0	0	0	0	0	0	0	0	0	0	0	0	0	0	0
Root	k__Archaea	p__Euryarchaeota	c__Methanobacteria	o__Methanobacteriales	f__Methanobacteriaceae	g__Methanobrevibacter	s__arboriphilus	2	0	0	0	0	0	0	0	0	0	0	0	0	0	0	0	0	0	0	0	0	0	0	0	0	0	0	0	0	2	0	0	0	0	0	0	0	0	0	0	0
Root	k__Archaea	p__Euryarchaeota	c__Thermoplasmata	o__E2	f__[Methanomassiliicoccaceae]	g__	s__	2	0	0	0	0	0	0	0	0	0	0	0	0	0	0	0	0	0	0	0	0	0	0	0	0	0	0	0	0	2	0	0	0	0	0	0	0	0	0	0	0
Root	k__Bacteria	p__Actinobacteria	c__Actinobacteria	o__Actinomycetales	f__Corynebacteriaceae	g__Corynebacterium	s__durum	2	0	0	0	0	0	0	0	0	0	0	0	0	0	0	0	0	0	0	0	0	0	0	0	0	0	0	0	0	0	0	0	0	0	1	0	1	0	0	0	0
Root	k__Bacteria	p__Actinobacteria	c__Actinobacteria	o__Actinomycetales	f__Microbacteriaceae	g__CandidatusRhodoluna	s__	2	0	0	0	0	0	0	0	0	0	0	0	0	0	0	0	0	1	0	0	0	0	0	1	0	0	0	0	0	0	0	0	0	0	0	0	0	0	0	0	0
Root	k__Bacteria	p__Actinobacteria	c__Actinobacteria	o__Actinomycetales	f__Nocardiaceae	g__Nocardia	s__	2	0	0	0	0	0	0	0	0	0	0	0	0	0	0	0	0	0	0	0	0	0	0	0	0	0	0	1	0	0	0	0	0	1	0	0	0	0	0	0	0
Root	k__Bacteria	p__Actinobacteria	c__Actinobacteria	o__Actinomycetales	f__Nocardioidaceae	g__	s__	2	0	0	0	1	0	1	0	0	0	0	0	0	0	0	0	0	0	0	0	0	0	0	0	0	0	0	0	0	0	0	0	0	0	0	0	0	0	0	0	0
Root	k__Bacteria	p__Actinobacteria	c__Actinobacteria	o__Actinomycetales	f__Propionibacteriaceae	g__Propionibacterium	s__	2	0	0	0	0	0	0	0	0	1	0	0	0	0	0	0	0	0	0	0	0	0	0	0	0	0	0	0	0	0	0	1	0	0	0	0	0	0	0	0	0
Root	k__Bacteria	p__Actinobacteria	c__Actinobacteria	o__Actinomycetales	f__Pseudonocardiaceae	g__Saccharomonospora	s__	2	0	0	0	0	0	0	0	0	0	0	0	0	0	0	0	1	0	0	1	0	0	0	0	0	0	0	0	0	0	0	0	0	0	0	0	0	0	0	0	0
Root	k__Bacteria	p__Actinobacteria	c__Actinobacteria	o__Actinomycetales	f__Streptomycetaceae	g__Streptomyces	s__mirabilis	2	0	0	0	0	0	0	0	0	0	0	0	0	0	0	0	0	0	1	0	0	0	0	0	0	0	0	0	0	0	0	0	0	0	0	0	0	0	1	0	0
Root	k__Bacteria	p__Actinobacteria	c__Actinobacteria	o__Bifidobacteriales	f__Bifidobacteriaceae	g__Bombiscardovia	s__	2	0	0	0	0	0	0	0	0	0	0	0	0	0	0	0	0	0	0	0	0	0	0	0	0	0	0	0	0	0	0	1	0	0	1	0	0	0	0	0	0
Root	k__Bacteria	p__Actinobacteria	c__Coriobacteriia	o__Coriobacteriales	f__Coriobacteriaceae	g__Eggerthella	s__	2	0	0	0	0	0	0	0	0	0	0	0	0	0	0	0	0	0	0	0	0	0	0	0	0	0	0	0	0	0	0	0	0	1	0	0	0	1	0	0	0
Root	k__Bacteria	p__BRC1	c__	o__	f__	g__	s__	2	0	0	0	0	0	0	0	0	0	0	0	0	0	0	0	0	0	0	0	0	0	0	1	0	0	0	0	0	0	0	0	1	0	0	0	0	0	0	0	0
Root	k__Bacteria	p__Bacteroidetes	c__Bacteroidia	o__Bacteroidales	f__Bacteroidaceae	g__Bacteroides	s__nordii	2	0	0	0	0	0	0	0	0	0	0	0	0	0	0	0	0	0	0	0	0	0	0	0	0	0	0	0	0	1	0	0	0	1	0	0	0	0	0	0	0
Root	k__Bacteria	p__Bacteroidetes	c__Bacteroidia	o__Bacteroidales	f__VC21_Bac22	g__	s__	2	0	0	0	0	0	1	0	0	0	0	0	0	0	0	0	0	0	1	0	0	0	0	0	0	0	0	0	0	0	0	0	0	0	0	0	0	0	0	0	0
Root	k__Bacteria	p__Bacteroidetes	c__Flavobacteriia	o__Flavobacteriales	f__Flavobacteriaceae	g__Psychroflexus	s__	2	0	0	0	0	0	1	0	0	0	0	0	0	0	0	0	0	0	0	0	0	0	0	0	0	0	0	0	0	0	0	0	0	0	0	0	0	1	0	0	0
Root	k__Bacteria	p__Bacteroidetes	c__Sphingobacteriia	o__Sphingobacteriales	f__Sphingobacteriaceae	g__Sphingobacterium	s__	2	0	0	0	0	0	0	0	0	0	0	0	0	0	0	0	0	0	0	0	0	1	1	0	0	0	0	0	0	0	0	0	0	0	0	0	0	0	0	0	0
Root	k__Bacteria	p__Bacteroidetes	c__[Saprospirae]	o__[Saprospirales]	f__Chitinophagaceae	g__	s__	2	1	0	0	0	0	0	0	0	0	0	0	0	0	0	0	0	1	0	0	0	0	0	0	0	0	0	0	0	0	0	0	0	0	0	0	0	0	0	0	0
Root	k__Bacteria	p__Bacteroidetes	c__[Saprospirae]	o__[Saprospirales]	f__Chitinophagaceae	g__Sediminibacterium	s__	2	0	0	0	0	0	0	0	0	0	1	0	0	0	0	0	0	0	0	0	0	0	0	0	0	0	0	1	0	0	0	0	0	0	0	0	0	0	0	0	0
Root	k__Bacteria	p__Cyanobacteria	c__ML635J-21	o__	f__	g__	s__	2	0	0	0	0	0	0	0	0	0	0	0	0	0	0	0	0	0	0	0	0	0	0	0	0	0	0	0	0	0	0	0	0	0	0	1	0	0	0	1	0
Root	k__Bacteria	p__Firmicutes	c__Bacilli	o__Bacillales	f__Bacillaceae	g__Anaerobacillus	s__	2	0	0	0	0	0	0	0	0	0	0	0	0	0	0	1	0	0	0	0	0	0	0	0	0	0	0	1	0	0	0	0	0	0	0	0	0	0	0	0	0
Root	k__Bacteria	p__Firmicutes	c__Bacilli	o__Bacillales	f__Bacillaceae	g__Virgibacillus	s__	2	0	1	0	0	0	0	0	0	0	0	0	0	0	0	0	0	0	0	1	0	0	0	0	0	0	0	0	0	0	0	0	0	0	0	0	0	0	0	0	0
Root	k__Bacteria	p__Firmicutes	c__Bacilli	o__Bacillales	f__Planococcaceae	g__Solibacillus	s__	2	0	0	0	0	0	0	0	0	0	0	0	0	0	0	0	0	0	0	0	0	0	0	0	0	0	0	0	0	0	0	0	1	0	0	0	1	0	0	0	0
Root	k__Bacteria	p__Firmicutes	c__Bacilli	o__Bacillales	f__Planococcaceae	g__Ureibacillus	s__	2	0	0	0	0	0	0	0	0	0	0	0	0	0	0	0	0	0	0	0	0	0	0	0	0	0	0	0	0	0	0	0	0	0	2	0	0	0	0	0	0
Root	k__Bacteria	p__Firmicutes	c__Bacilli	o__Bacillales	f__Staphylococcaceae	g__Jeotgalicoccus	s__psychrophilus	2	0	0	0	0	0	0	0	0	0	0	0	0	0	0	0	0	0	0	0	0	0	0	0	0	0	0	0	0	0	0	0	0	0	1	0	0	0	0	1	0
Root	k__Bacteria	p__Firmicutes	c__Bacilli	o__Bacillales	f__Staphylococcaceae	g__Macrococcus	s__caseolyticus	2	0	0	0	0	0	0	0	0	0	0	0	0	0	0	0	0	0	0	0	0	0	0	0	0	0	0	0	0	0	0	0	1	0	0	1	0	0	0	0	0
Root	k__Bacteria	p__Firmicutes	c__Bacilli	o__Bacillales	f__Staphylococcaceae	g__Staphylococcus	s__succinus	2	0	0	0	1	0	0	0	0	0	0	0	0	0	0	0	0	0	0	0	0	0	0	0	0	0	0	0	0	0	0	0	0	0	0	0	1	0	0	0	0
Root	k__Bacteria	p__Firmicutes	c__Bacilli	o__Haloplasmatales	f__Haloplasmataceae	g__Haloplasma	s__contractile	2	0	0	0	0	1	0	0	0	0	0	0	0	0	0	1	0	0	0	0	0	0	0	0	0	0	0	0	0	0	0	0	0	0	0	0	0	0	0	0	0
Root	k__Bacteria	p__Firmicutes	c__Bacilli	o__Lactobacillales	f__Enterococcaceae	g__Enterococcus	s__casseliflavus	2	0	0	0	0	0	0	0	0	0	0	0	0	0	0	0	0	0	0	0	0	0	0	0	0	0	0	1	1	0	0	0	0	0	0	0	0	0	0	0	0
Root	k__Bacteria	p__Firmicutes	c__Bacilli	o__Lactobacillales	f__Enterococcaceae	g__Enterococcus	s__haemoperoxidus	2	0	0	0	0	0	0	0	0	0	0	0	0	0	0	0	0	0	0	0	0	0	0	0	0	0	0	1	0	0	0	1	0	0	0	0	0	0	0	0	0
Root	k__Bacteria	p__Firmicutes	c__Bacilli	o__Lactobacillales	f__Enterococcaceae	g__Vagococcus	s__	2	0	0	0	0	0	0	0	0	0	0	0	0	0	0	0	1	0	0	0	0	0	0	0	0	0	0	0	0	0	0	0	0	1	0	0	0	0	0	0	0
Root	k__Bacteria	p__Firmicutes	c__Bacilli	o__Lactobacillales	f__Lactobacillaceae	g__Lactobacillus	s__brevis	2	0	0	0	0	0	0	0	0	0	0	0	0	0	0	0	0	0	0	0	0	0	0	0	0	0	0	0	0	0	0	0	1	0	1	0	0	0	0	0	0
Root	k__Bacteria	p__Firmicutes	c__Bacilli	o__Lactobacillales	f__Leuconostocaceae	g__Oenococcus	s__kitaharae	2	0	0	0	0	0	0	0	1	0	0	0	0	0	0	0	1	0	0	0	0	0	0	0	0	0	0	0	0	0	0	0	0	0	0	0	0	0	0	0	0
Root	k__Bacteria	p__Firmicutes	c__Clostridia	o__Clostridiales	f__Clostridiaceae	g__Clostridium	s__tyrobutyricum	2	0	0	0	0	0	0	1	0	0	0	0	0	0	0	0	0	0	0	0	0	0	0	0	0	0	0	1	0	0	0	0	0	0	0	0	0	0	0	0	0
Root	k__Bacteria	p__Firmicutes	c__Clostridia	o__Clostridiales	f__Lachnospiraceae	g__Moryella	s__indoligenes	2	0	0	0	0	0	0	0	0	0	0	0	0	0	0	0	0	0	0	0	0	0	0	1	0	0	0	0	0	0	0	1	0	0	0	0	0	0	0	0	0
Root	k__Bacteria	p__Firmicutes	c__Clostridia	o__Clostridiales	f__Peptococcaceae	g__Dehalobacter_Syntrophobotulus	s__	2	0	0	0	0	0	0	0	0	0	0	0	0	0	0	0	0	0	0	0	0	0	0	1	0	0	0	0	0	0	1	0	0	0	0	0	0	0	0	0	0
Root	k__Bacteria	p__Firmicutes	c__Clostridia	o__Clostridiales	f__Ruminococcaceae	g__Papillibacter	s__cinnamivorans	2	0	0	0	0	0	0	0	0	0	0	1	0	0	0	0	0	0	0	0	0	0	0	0	0	0	0	0	0	0	0	0	0	0	0	1	0	0	0	0	0
Root	k__Bacteria	p__Firmicutes	c__Clostridia	o__Clostridiales	f__[Acidaminobacteraceae]	g__	s__	2	0	0	0	0	0	0	0	0	0	0	0	0	0	1	0	0	0	1	0	0	0	0	0	0	0	0	0	0	0	0	0	0	0	0	0	0	0	0	0	0
Root	k__Bacteria	p__Firmicutes	c__Clostridia	o__Clostridiales	f__[Tissierellaceae]	g__1-68	s__	2	0	0	0	0	0	1	0	0	0	0	0	0	0	0	0	0	0	0	0	0	0	0	0	0	0	0	0	0	0	0	0	0	0	0	0	1	0	0	0	0
Root	k__Bacteria	p__Firmicutes	c__Clostridia	o__Clostridiales	f__[Tissierellaceae]	g__Finegoldia	s__	2	0	1	0	0	0	0	0	0	0	0	0	0	0	0	0	0	0	0	0	0	0	0	0	0	0	0	0	0	0	0	0	0	0	0	0	0	0	1	0	0
Root	k__Bacteria	p__Firmicutes	c__Clostridia	o__Halanaerobiales	f__Halobacteroidaceae	g__Halanaerobacter	s__	2	0	0	0	0	0	0	0	0	0	0	0	0	0	0	0	0	0	0	0	0	0	0	0	0	0	0	0	0	0	0	0	0	0	0	0	0	0	1	0	1
Root	k__Bacteria	p__Firmicutes	c__Erysipelotrichi	o__Erysipelotrichales	f__Erysipelotrichaceae	g__Bulleidia	s__p-1630-c5	2	1	0	0	0	0	0	0	0	0	0	0	0	0	0	0	0	0	0	0	0	0	0	0	1	0	0	0	0	0	0	0	0	0	0	0	0	0	0	0	0
Root	k__Bacteria	p__Firmicutes	c__Erysipelotrichi	o__Erysipelotrichales	f__Erysipelotrichaceae	g__PSB-M-3	s__	2	0	0	0	0	0	0	1	0	0	0	0	0	0	0	0	0	0	0	0	0	0	0	0	0	0	0	0	0	0	0	0	1	0	0	0	0	0	0	0	0
Root	k__Bacteria	p__Gemmatimonadetes	c__Gemmatimonadetes	o__	f__	g__	s__	2	0	0	0	0	0	0	0	0	0	0	0	0	0	0	0	0	0	0	1	0	0	0	0	0	0	0	0	0	0	0	0	0	0	1	0	0	0	0	0	0
Root	k__Bacteria	p__Proteobacteria	c__Alphaproteobacteria	o__	f__	g__	s__	2	0	0	0	0	0	0	0	0	0	0	0	0	0	0	0	0	2	0	0	0	0	0	0	0	0	0	0	0	0	0	0	0	0	0	0	0	0	0	0	0
Root	k__Bacteria	p__Proteobacteria	c__Alphaproteobacteria	o__Rhodospirillales	f__	g__	s__	2	0	0	0	0	1	0	0	0	0	0	0	1	0	0	0	0	0	0	0	0	0	0	0	0	0	0	0	0	0	0	0	0	0	0	0	0	0	0	0	0
Root	k__Bacteria	p__Proteobacteria	c__Betaproteobacteria	o__Burkholderiales	f__Alcaligenaceae	g__Oligella	s__	2	0	0	0	0	0	0	0	0	0	0	0	0	0	0	0	0	0	0	0	0	0	0	0	0	0	0	0	0	0	0	0	0	0	0	0	0	0	1	1	0
Root	k__Bacteria	p__Proteobacteria	c__Betaproteobacteria	o__Burkholderiales	f__Comamonadaceae	g__Aquincola	s__tertiaricarbonis	2	0	0	1	1	0	0	0	0	0	0	0	0	0	0	0	0	0	0	0	0	0	0	0	0	0	0	0	0	0	0	0	0	0	0	0	0	0	0	0	0
Root	k__Bacteria	p__Proteobacteria	c__Betaproteobacteria	o__Burkholderiales	f__Comamonadaceae	g__Comamonas	s__	2	0	0	0	0	0	0	0	0	0	0	1	0	0	0	0	0	0	0	1	0	0	0	0	0	0	0	0	0	0	0	0	0	0	0	0	0	0	0	0	0
Root	k__Bacteria	p__Proteobacteria	c__Betaproteobacteria	o__Burkholderiales	f__Oxalobacteraceae	g__Oxalobacter	s__	2	0	0	0	0	0	0	0	0	0	0	0	0	0	0	0	0	0	0	0	0	0	1	0	0	0	0	0	0	0	0	0	1	0	0	0	0	0	0	0	0
Root	k__Bacteria	p__Proteobacteria	c__Deltaproteobacteria	o__	f__	g__	s__	2	0	0	0	1	0	0	0	0	0	0	0	0	0	0	0	0	0	0	0	0	0	0	0	0	0	0	1	0	0	0	0	0	0	0	0	0	0	0	0	0
Root	k__Bacteria	p__Proteobacteria	c__Deltaproteobacteria	o__Desulfovibrionales	f__Desulfovibrionaceae	g__Desulfovibrio	s__C21_c20	2	0	0	0	0	0	0	0	0	0	0	0	0	0	0	0	0	0	0	0	0	0	0	1	0	0	0	0	0	1	0	0	0	0	0	0	0	0	0	0	0
Root	k__Bacteria	p__Proteobacteria	c__Epsilonproteobacteria	o__Campylobacterales	f__Campylobacteraceae	g__Campylobacter	s__ureolyticus	2	0	0	0	0	0	0	0	0	0	0	0	0	0	0	0	0	0	0	2	0	0	0	0	0	0	0	0	0	0	0	0	0	0	0	0	0	0	0	0	0
Root	k__Bacteria	p__Proteobacteria	c__Epsilonproteobacteria	o__Campylobacterales	f__Campylobacteraceae	g__Sulfurospirillum	s__	2	0	0	0	0	0	0	0	1	0	0	0	0	0	0	0	0	0	0	0	0	0	0	0	0	0	0	0	0	0	0	0	0	0	0	1	0	0	0	0	0
Root	k__Bacteria	p__Proteobacteria	c__Gammaproteobacteria	o__Alteromonadales	f__	g__	s__	2	0	0	0	0	0	0	0	0	0	0	0	0	0	0	0	0	0	0	0	0	0	0	0	0	0	0	1	1	0	0	0	0	0	0	0	0	0	0	0	0
Root	k__Bacteria	p__Proteobacteria	c__Gammaproteobacteria	o__Alteromonadales	f__Shewanellaceae	g__Shewanella	s__	2	0	0	0	0	0	0	0	0	0	0	0	0	0	0	0	0	0	0	0	0	0	0	0	0	0	0	0	2	0	0	0	0	0	0	0	0	0	0	0	0
Root	k__Bacteria	p__Proteobacteria	c__Gammaproteobacteria	o__Alteromonadales	f__Shewanellaceae	g__Shewanella	s__pacifica	2	0	0	0	0	0	0	0	0	0	0	0	0	0	0	0	0	0	0	0	0	0	0	0	0	0	0	0	2	0	0	0	0	0	0	0	0	0	0	0	0
Root	k__Bacteria	p__Proteobacteria	c__Gammaproteobacteria	o__Chromatiales	f__Halothiobacillaceae	g__	s__	2	0	0	0	0	0	0	0	0	0	0	0	0	0	0	0	0	0	0	0	0	0	0	0	0	0	0	1	1	0	0	0	0	0	0	0	0	0	0	0	0
Root	k__Bacteria	p__Proteobacteria	c__Gammaproteobacteria	o__Enterobacteriales	f__Enterobacteriaceae	g__Enterobacter	s__aerogenes	2	0	0	0	0	0	0	0	0	0	0	0	0	0	0	0	0	0	0	0	0	0	0	0	0	0	0	2	0	0	0	0	0	0	0	0	0	0	0	0	0
Root	k__Bacteria	p__Proteobacteria	c__Gammaproteobacteria	o__Enterobacteriales	f__Enterobacteriaceae	g__Enterobacter	s__hormaechei	2	0	0	0	0	0	0	0	0	0	0	0	0	0	0	0	0	0	0	0	0	0	0	0	0	0	0	1	1	0	0	0	0	0	0	0	0	0	0	0	0
Root	k__Bacteria	p__Proteobacteria	c__Gammaproteobacteria	o__Enterobacteriales	f__Enterobacteriaceae	g__Morganella	s__	2	0	0	0	0	0	0	0	0	0	0	0	0	0	0	0	0	0	0	0	0	0	0	0	0	0	0	0	0	0	0	1	0	0	0	0	0	1	0	0	0
Root	k__Bacteria	p__Proteobacteria	c__Gammaproteobacteria	o__Enterobacteriales	f__Enterobacteriaceae	g__Shigella	s__sonnei	2	0	0	0	0	0	0	0	0	0	0	0	0	0	0	0	0	0	0	0	0	0	0	0	0	0	0	1	1	0	0	0	0	0	0	0	0	0	0	0	0
Root	k__Bacteria	p__Proteobacteria	c__Gammaproteobacteria	o__Enterobacteriales	f__Enterobacteriaceae	g__Xenorhabdus	s__nematophila	2	0	0	0	0	0	0	0	0	0	0	0	0	0	0	0	0	0	0	0	0	0	0	0	0	0	0	0	2	0	0	0	0	0	0	0	0	0	0	0	0
Root	k__Bacteria	p__Proteobacteria	c__Gammaproteobacteria	o__Legionellales	f__Coxiellaceae	g__	s__	2	0	0	0	0	1	0	0	0	0	0	1	0	0	0	0	0	0	0	0	0	0	0	0	0	0	0	0	0	0	0	0	0	0	0	0	0	0	0	0	0
Root	k__Bacteria	p__Proteobacteria	c__Gammaproteobacteria	o__Oceanospirillales	f__Oleiphilaceae	g__	s__	2	0	0	0	0	0	0	0	0	0	0	0	0	0	0	0	0	0	0	0	0	0	0	0	0	0	0	0	2	0	0	0	0	0	0	0	0	0	0	0	0
Root	k__Bacteria	p__Proteobacteria	c__Gammaproteobacteria	o__Pasteurellales	f__Pasteurellaceae	g__Aggregatibacter	s__pneumotropica	2	0	0	0	0	0	0	0	0	0	0	0	0	1	0	0	0	0	0	0	0	0	0	0	1	0	0	0	0	0	0	0	0	0	0	0	0	0	0	0	0
Root	k__Bacteria	p__Proteobacteria	c__Gammaproteobacteria	o__Pasteurellales	f__Pasteurellaceae	g__Gallibacterium	s__genomosp.	2	0	0	0	0	0	0	0	1	0	0	0	0	0	0	0	0	0	0	0	0	0	0	0	0	0	1	0	0	0	0	0	0	0	0	0	0	0	0	0	0
Root	k__Bacteria	p__Proteobacteria	c__Gammaproteobacteria	o__Pseudomonadales	f__Pseudomonadaceae	g__Pseudomonas	s__alcaligenes	2	0	0	0	0	0	0	0	0	0	0	0	0	0	0	0	0	0	0	0	0	0	0	0	0	0	0	0	0	0	1	1	0	0	0	0	0	0	0	0	0
Root	k__Bacteria	p__Proteobacteria	c__Gammaproteobacteria	o__Vibrionales	f__Vibrionaceae	g__Salinivibrio	s__costicola	2	0	0	0	0	0	0	0	0	0	0	0	0	0	0	0	0	0	0	0	0	0	0	0	0	0	0	1	1	0	0	0	0	0	0	0	0	0	0	0	0
Root	k__Bacteria	p__TM7	c__	o__	f__	g__	s__	2	0	0	0	0	0	0	0	0	0	0	0	0	0	0	0	0	0	0	1	1	0	0	0	0	0	0	0	0	0	0	0	0	0	0	0	0	0	0	0	0
Root	k__Bacteria	p__TM7	c__TM7-3	o__I025	f__Rs-045	g__	s__	2	0	0	0	0	0	0	0	0	0	0	0	0	0	0	0	0	0	0	0	0	0	0	0	0	0	0	0	0	0	0	0	0	0	0	0	0	2	0	0	0
Root	k__Bacteria	p__Tenericutes	c__Mollicutes	o__Anaeroplasmatales	f__Anaeroplasmataceae	g__gut	s__metagenome	2	0	0	0	0	0	0	0	0	0	0	0	0	0	0	0	0	0	0	0	0	0	0	0	1	0	0	0	0	0	1	0	0	0	0	0	0	0	0	0	0
Root	k__Bacteria	p__Verrucomicrobia	c__Opitutae	o__Opitutales	f__Opitutaceae	g__Opitutus	s__	2	0	0	0	0	0	0	0	0	0	0	0	0	0	0	0	0	0	0	0	0	0	0	0	0	0	0	1	1	0	0	0	0	0	0	0	0	0	0	0	0
Root	k__Bacteria	p__Verrucomicrobia	c__[Spartobacteria]	o__[Chthoniobacterales]	f__[Chthoniobacteraceae]	g__Ellin506	s__	2	0	0	0	1	0	0	0	0	0	0	0	0	0	0	0	0	0	0	0	0	0	0	0	0	0	0	0	0	0	1	0	0	0	0	0	0	0	0	0	0
Root	k__Bacteria	p__WPS-2	c__	o__	f__	g__	s__	2	0	0	0	0	0	0	0	0	0	0	0	0	0	0	1	0	0	0	0	0	0	0	1	0	0	0	0	0	0	0	0	0	0	0	0	0	0	0	0	0
Root	k__Archaea	p__Euryarchaeota	c__Thermoplasmata	o__E2	f__[Methanomassiliicoccaceae]	g__vadinCA11	s__	1	0	0	0	0	0	0	0	0	0	0	0	0	0	0	0	0	0	0	0	0	0	0	1	0	0	0	0	0	0	0	0	0	0	0	0	0	0	0	0	0
Root	k__Bacteria	p__Acidobacteria	c__Acidobacteria-6	o__iii1-15	f__mb2424	g__	s__	1	0	0	0	0	0	0	0	0	0	0	0	0	0	0	0	0	0	0	0	0	0	0	1	0	0	0	0	0	0	0	0	0	0	0	0	0	0	0	0	0
Root	k__Bacteria	p__Acidobacteria	c__[Chloracidobacteria]	o__	f__	g__	s__	1	0	0	0	0	0	0	0	0	0	1	0	0	0	0	0	0	0	0	0	0	0	0	0	0	0	0	0	0	0	0	0	0	0	0	0	0	0	0	0	0
Root	k__Bacteria	p__Actinobacteria	c__Acidimicrobiia	o__Acidimicrobiales	f__JdFBGBact	g__	s__	1	0	0	0	1	0	0	0	0	0	0	0	0	0	0	0	0	0	0	0	0	0	0	0	0	0	0	0	0	0	0	0	0	0	0	0	0	0	0	0	0
Root	k__Bacteria	p__Actinobacteria	c__Acidimicrobiia	o__Acidimicrobiales	f__TK06	g__	s__	1	0	0	0	0	0	0	0	0	0	0	0	1	0	0	0	0	0	0	0	0	0	0	0	0	0	0	0	0	0	0	0	0	0	0	0	0	0	0	0	0
Root	k__Bacteria	p__Actinobacteria	c__Actinobacteria	o__Actinomycetales	f__Actinomycetaceae	g__Actinobaculum	s__	1	0	0	0	0	0	0	0	0	1	0	0	0	0	0	0	0	0	0	0	0	0	0	0	0	0	0	0	0	0	0	0	0	0	0	0	0	0	0	0	0
Root	k__Bacteria	p__Actinobacteria	c__Actinobacteria	o__Actinomycetales	f__Actinomycetaceae	g__Varibaculum	s__	1	0	0	0	0	1	0	0	0	0	0	0	0	0	0	0	0	0	0	0	0	0	0	0	0	0	0	0	0	0	0	0	0	0	0	0	0	0	0	0	0
Root	k__Bacteria	p__Actinobacteria	c__Actinobacteria	o__Actinomycetales	f__Brevibacteriaceae	g__Brevibacterium	s__	1	0	0	0	0	0	0	0	0	0	0	0	0	0	0	0	0	0	0	0	0	0	0	0	0	0	0	0	0	0	0	0	0	1	0	0	0	0	0	0	0
Root	k__Bacteria	p__Actinobacteria	c__Actinobacteria	o__Actinomycetales	f__Cellulomonadaceae	g__	s__	1	0	0	0	0	1	0	0	0	0	0	0	0	0	0	0	0	0	0	0	0	0	0	0	0	0	0	0	0	0	0	0	0	0	0	0	0	0	0	0	0
Root	k__Bacteria	p__Actinobacteria	c__Actinobacteria	o__Actinomycetales	f__Cellulomonadaceae	g__Demequina	s__	1	0	0	0	0	0	0	0	0	0	0	0	0	0	0	0	0	0	0	0	0	0	0	0	0	0	0	0	0	0	0	0	0	0	1	0	0	0	0	0	0
Root	k__Bacteria	p__Actinobacteria	c__Actinobacteria	o__Actinomycetales	f__Dermacoccaceae	g__Dermacoccus	s__	1	1	0	0	0	0	0	0	0	0	0	0	0	0	0	0	0	0	0	0	0	0	0	0	0	0	0	0	0	0	0	0	0	0	0	0	0	0	0	0	0
Root	k__Bacteria	p__Actinobacteria	c__Actinobacteria	o__Actinomycetales	f__Microbacteriaceae	g__Leucobacter	s__	1	0	0	0	0	0	0	0	0	0	0	0	0	0	0	0	0	0	0	0	0	0	0	0	0	0	0	0	0	0	0	1	0	0	0	0	0	0	0	0	0
Root	k__Bacteria	p__Actinobacteria	c__Actinobacteria	o__Actinomycetales	f__Micrococcaceae	g__Arthrobacter	s__	1	0	0	0	0	0	0	0	0	0	1	0	0	0	0	0	0	0	0	0	0	0	0	0	0	0	0	0	0	0	0	0	0	0	0	0	0	0	0	0	0
Root	k__Bacteria	p__Actinobacteria	c__Actinobacteria	o__Actinomycetales	f__Micrococcaceae	g__Kocuria	s__palustris	1	0	0	0	0	0	0	0	0	0	0	0	0	0	0	0	0	0	0	0	0	0	0	0	0	0	0	0	0	0	0	0	0	1	0	0	0	0	0	0	0
Root	k__Bacteria	p__Actinobacteria	c__Actinobacteria	o__Actinomycetales	f__Mycobacteriaceae	g__Mycobacterium	s__	1	0	0	0	0	0	0	0	0	0	0	0	0	1	0	0	0	0	0	0	0	0	0	0	0	0	0	0	0	0	0	0	0	0	0	0	0	0	0	0	0
Root	k__Bacteria	p__Actinobacteria	c__Actinobacteria	o__Actinomycetales	f__Nocardiaceae	g__Rhodococcus	s__equi	1	0	0	0	0	0	0	0	0	0	0	0	0	0	0	0	0	0	0	0	0	0	0	0	0	0	0	0	0	0	0	0	0	0	0	0	0	0	0	0	1
Root	k__Bacteria	p__Actinobacteria	c__Actinobacteria	o__Actinomycetales	f__Sanguibacteraceae	g__Sanguibacter	s__	1	0	0	0	0	0	0	0	0	0	0	0	0	0	0	0	0	0	0	1	0	0	0	0	0	0	0	0	0	0	0	0	0	0	0	0	0	0	0	0	0
Root	k__Bacteria	p__Actinobacteria	c__Actinobacteria	o__Actinomycetales	f__Streptomycetaceae	g__	s__	1	0	0	0	0	0	0	0	0	0	0	0	0	0	0	0	0	0	0	0	0	0	0	0	0	0	0	0	0	0	0	0	0	0	0	0	0	1	0	0	0
Root	k__Bacteria	p__Actinobacteria	c__Actinobacteria	o__Bifidobacteriales	f__Bifidobacteriaceae	g__Scardovia	s__	1	0	0	0	0	0	0	0	0	1	0	0	0	0	0	0	0	0	0	0	0	0	0	0	0	0	0	0	0	0	0	0	0	0	0	0	0	0	0	0	0
Root	k__Bacteria	p__Actinobacteria	c__Coriobacteriia	o__Coriobacteriales	f__Coriobacteriaceae	g__Atopobium	s__rimae	1	0	1	0	0	0	0	0	0	0	0	0	0	0	0	0	0	0	0	0	0	0	0	0	0	0	0	0	0	0	0	0	0	0	0	0	0	0	0	0	0
Root	k__Bacteria	p__Actinobacteria	c__Coriobacteriia	o__Coriobacteriales	f__Coriobacteriaceae	g__Enterococcus	s__casseliflavus	1	0	0	0	0	0	0	1	0	0	0	0	0	0	0	0	0	0	0	0	0	0	0	0	0	0	0	0	0	0	0	0	0	0	0	0	0	0	0	0	0
Root	k__Bacteria	p__Actinobacteria	c__Thermoleophilia	o__Solirubrobacterales	f__Conexibacteraceae	g__	s__	1	0	0	0	0	0	0	0	0	0	0	0	0	0	0	0	0	0	0	0	0	0	0	0	0	0	0	0	0	0	0	0	1	0	0	0	0	0	0	0	0
Root	k__Bacteria	p__Actinobacteria	c__Thermoleophilia	o__Solirubrobacterales	f__Patulibacteraceae	g__	s__	1	0	0	0	0	0	0	0	0	0	0	0	0	0	0	0	0	0	0	0	0	0	0	0	0	0	0	0	0	1	0	0	0	0	0	0	0	0	0	0	0
Root	k__Bacteria	p__Bacteroidetes	c__Bacteroidia	o__Bacteroidales	f__GZKB119	g__	s__	1	0	0	0	0	0	0	0	0	0	0	0	0	0	0	0	0	0	0	0	0	0	0	0	0	0	0	0	0	0	0	0	0	1	0	0	0	0	0	0	0
Root	k__Bacteria	p__Bacteroidetes	c__Cytophagia	o__Cytophagales	f__Cyclobacteriaceae	g__Nitritalea	s__halalkaliphila	1	0	0	0	0	1	0	0	0	0	0	0	0	0	0	0	0	0	0	0	0	0	0	0	0	0	0	0	0	0	0	0	0	0	0	0	0	0	0	0	0
Root	k__Bacteria	p__Bacteroidetes	c__Cytophagia	o__Cytophagales	f__Cytophagaceae	g__Pontibacter	s__	1	0	0	0	0	0	0	0	0	0	0	0	0	0	0	0	0	0	0	0	0	0	0	0	0	0	0	0	0	0	0	0	1	0	0	0	0	0	0	0	0
Root	k__Bacteria	p__Bacteroidetes	c__Cytophagia	o__Cytophagales	f__Flammeovirgaceae	g__Flexibacter	s__	1	0	0	0	0	0	0	0	0	0	0	0	0	1	0	0	0	0	0	0	0	0	0	0	0	0	0	0	0	0	0	0	0	0	0	0	0	0	0	0	0
Root	k__Bacteria	p__Bacteroidetes	c__Flavobacteriia	o__Flavobacteriales	f__[Weeksellaceae]	g__Wautersiella	s__	1	0	0	0	0	0	0	0	0	0	0	0	0	0	0	0	0	0	0	0	0	0	0	0	0	0	0	1	0	0	0	0	0	0	0	0	0	0	0	0	0
Root	k__Bacteria	p__Bacteroidetes	c__[Saprospirae]	o__[Saprospirales]	f__Chitinophagaceae	g__Chitinophaga	s__	1	0	0	0	0	0	0	0	0	0	0	0	0	0	0	0	0	0	0	0	0	0	0	0	0	0	0	0	0	1	0	0	0	0	0	0	0	0	0	0	0
Root	k__Bacteria	p__Chlorobi	c__Chlorobia	o__Chlorobiales	f__Chlorobiaceae	g__Prosthecochloris	s__	1	0	0	0	0	0	0	0	0	0	0	0	0	0	0	0	0	0	0	0	0	0	0	1	0	0	0	0	0	0	0	0	0	0	0	0	0	0	0	0	0
Root	k__Bacteria	p__Chlorobi	c__Ignavibacteria	o__Ignavibacteriales	f__Ignavibacteriaceae	g__	s__	1	0	0	0	0	0	0	0	0	0	0	0	0	0	0	0	0	0	0	1	0	0	0	0	0	0	0	0	0	0	0	0	0	0	0	0	0	0	0	0	0
Root	k__Bacteria	p__Chloroflexi	c__Anaerolineae	o__Caldilineales	f__Caldilineaceae	g__Litorilinea	s__aerophila	1	0	0	0	0	0	0	0	0	0	0	0	0	0	0	0	0	0	0	0	1	0	0	0	0	0	0	0	0	0	0	0	0	0	0	0	0	0	0	0	0
Root	k__Bacteria	p__Chloroflexi	c__[Thermobacula]	o__[Thermobaculales]	f__[Thermobaculaceae]	g__Thermobaculum	s__terrenum	1	0	0	0	0	0	0	0	0	0	0	0	0	0	0	0	0	0	0	1	0	0	0	0	0	0	0	0	0	0	0	0	0	0	0	0	0	0	0	0	0
Root	k__Bacteria	p__Cyanobacteria	c__Chloroplast	o__	f__	g__	s__	1	0	0	0	0	0	0	0	0	0	0	0	0	0	0	0	1	0	0	0	0	0	0	0	0	0	0	0	0	0	0	0	0	0	0	0	0	0	0	0	0
Root	k__Bacteria	p__Cyanobacteria	c__Chloroplast	o__Haptophyceae	f__	g__	s__	1	0	0	0	0	0	0	0	0	0	0	0	0	0	0	0	0	0	1	0	0	0	0	0	0	0	0	0	0	0	0	0	0	0	0	0	0	0	0	0	0
Root	k__Bacteria	p__Cyanobacteria	c__Oscillatoriophycideae	o__Chroococcales	f__	g__	s__	1	0	0	1	0	0	0	0	0	0	0	0	0	0	0	0	0	0	0	0	0	0	0	0	0	0	0	0	0	0	0	0	0	0	0	0	0	0	0	0	0
Root	k__Bacteria	p__Cyanobacteria	c__Synechococcophycideae	o__Pseudanabaenales	f__Pseudanabaenaceae	g__Pseudanabaena	s__	1	0	0	0	0	0	0	0	0	0	0	0	1	0	0	0	0	0	0	0	0	0	0	0	0	0	0	0	0	0	0	0	0	0	0	0	0	0	0	0	0
Root	k__Bacteria	p__Cyanobacteria	c__Synechococcophycideae	o__Pseudanabaenales	f__Pseudanabaenaceae	g__Synechococcus	s__elongatus	1	0	0	0	0	0	0	0	0	0	0	0	0	0	0	0	0	0	0	0	0	0	0	1	0	0	0	0	0	0	0	0	0	0	0	0	0	0	0	0	0
Root	k__Bacteria	p__Dictyoglomi	c__Dictyoglomia	o__Dictyoglomales	f__Dictyoglomaceae	g__Dictyoglomus	s__	1	0	0	0	0	0	0	0	1	0	0	0	0	0	0	0	0	0	0	0	0	0	0	0	0	0	0	0	0	0	0	0	0	0	0	0	0	0	0	0	0
Root	k__Bacteria	p__Firmicutes	c__Bacilli	o__Bacillales	f__Alicyclobacillaceae	g__	s__	1	0	0	0	0	0	0	0	0	0	0	0	0	0	0	0	0	0	0	0	0	0	0	0	0	0	0	0	0	0	0	0	0	1	0	0	0	0	0	0	0
Root	k__Bacteria	p__Firmicutes	c__Bacilli	o__Bacillales	f__Alicyclobacillaceae	g__Alicyclobacillus	s__pomorum	1	0	0	0	0	0	0	0	0	1	0	0	0	0	0	0	0	0	0	0	0	0	0	0	0	0	0	0	0	0	0	0	0	0	0	0	0	0	0	0	0
Root	k__Bacteria	p__Firmicutes	c__Bacilli	o__Bacillales	f__Planococcaceae	g__Kurthia	s__	1	0	0	0	0	0	0	0	0	0	0	0	0	0	0	0	0	0	0	0	0	0	0	0	0	0	0	0	0	0	0	0	0	1	0	0	0	0	0	0	0
Root	k__Bacteria	p__Firmicutes	c__Bacilli	o__Bacillales	f__Planococcaceae	g__Lysinibacillus	s__boronitolerans	1	0	0	0	0	0	0	0	0	0	0	0	0	0	0	0	0	0	0	0	0	0	0	0	0	0	0	0	0	0	0	0	1	0	0	0	0	0	0	0	0
Root	k__Bacteria	p__Firmicutes	c__Bacilli	o__Bacillales	f__Planococcaceae	g__Sporosarcina	s__	1	0	0	0	0	0	0	0	0	0	0	0	0	0	0	0	0	0	0	0	0	0	0	0	0	0	0	0	0	0	0	0	1	0	0	0	0	0	0	0	0
Root	k__Bacteria	p__Firmicutes	c__Bacilli	o__Bacillales	f__Staphylococcaceae	g__Salinicoccus	s__	1	0	0	0	0	0	0	0	0	0	0	0	0	0	0	0	0	0	0	0	0	0	0	0	0	0	0	1	0	0	0	0	0	0	0	0	0	0	0	0	0
Root	k__Bacteria	p__Firmicutes	c__Bacilli	o__Bacillales	f__Thermoactinomycetaceae	g__	s__	1	0	0	1	0	0	0	0	0	0	0	0	0	0	0	0	0	0	0	0	0	0	0	0	0	0	0	0	0	0	0	0	0	0	0	0	0	0	0	0	0
Root	k__Bacteria	p__Firmicutes	c__Bacilli	o__Bacillales	f__[Exiguobacteraceae]	g__Exiguobacterium	s__	1	0	0	0	0	0	0	0	0	0	0	0	0	0	1	0	0	0	0	0	0	0	0	0	0	0	0	0	0	0	0	0	0	0	0	0	0	0	0	0	0
Root	k__Bacteria	p__Firmicutes	c__Bacilli	o__Lactobacillales	f__Aerococcaceae	g__Abiotrophia	s__	1	0	0	0	0	0	0	0	0	0	0	0	0	0	0	0	0	0	0	0	0	0	0	0	0	0	0	0	1	0	0	0	0	0	0	0	0	0	0	0	0
Root	k__Bacteria	p__Firmicutes	c__Bacilli	o__Lactobacillales	f__Enterococcaceae	g__Enterococcus	s__cecorum	1	0	0	0	0	0	0	0	0	0	0	0	0	0	0	0	0	0	0	0	0	0	0	0	0	0	0	1	0	0	0	0	0	0	0	0	0	0	0	0	0
Root	k__Bacteria	p__Firmicutes	c__Bacilli	o__Lactobacillales	f__Lactobacillaceae	g__Lactobacillus	s__vaginalis	1	0	0	0	0	0	0	0	0	0	0	0	0	0	0	0	0	0	0	0	0	1	0	0	0	0	0	0	0	0	0	0	0	0	0	0	0	0	0	0	0
Root	k__Bacteria	p__Firmicutes	c__Bacilli	o__Lactobacillales	f__Streptococcaceae	g__Streptococcus	s__sobrinus	1	0	0	0	0	0	0	0	0	0	0	0	0	0	0	0	0	0	0	0	0	0	0	0	0	0	0	0	0	0	0	0	0	0	0	0	0	0	0	1	0
Root	k__Bacteria	p__Firmicutes	c__Clostridia	o__Clostridiales	f__Clostridiaceae	g__Caloranaerobacter	s__	1	0	0	0	0	0	0	0	0	0	0	0	0	0	0	0	0	0	0	0	0	0	0	0	0	0	0	0	1	0	0	0	0	0	0	0	0	0	0	0	0
Root	k__Bacteria	p__Firmicutes	c__Clostridia	o__Clostridiales	f__Clostridiaceae	g__Clostridiisalibacter	s__	1	0	0	0	0	0	0	0	0	0	0	0	0	0	0	0	0	0	0	0	0	0	0	0	0	0	0	0	1	0	0	0	0	0	0	0	0	0	0	0	0
Root	k__Bacteria	p__Firmicutes	c__Clostridia	o__Clostridiales	f__Clostridiaceae	g__Clostridium	s__cellulovorans	1	1	0	0	0	0	0	0	0	0	0	0	0	0	0	0	0	0	0	0	0	0	0	0	0	0	0	0	0	0	0	0	0	0	0	0	0	0	0	0	0
Root	k__Bacteria	p__Firmicutes	c__Clostridia	o__Clostridiales	f__Clostridiaceae	g__Clostridium	s__neonatale	1	0	0	0	0	0	1	0	0	0	0	0	0	0	0	0	0	0	0	0	0	0	0	0	0	0	0	0	0	0	0	0	0	0	0	0	0	0	0	0	0
Root	k__Bacteria	p__Firmicutes	c__Clostridia	o__Clostridiales	f__Clostridiaceae	g__Clostridium	s__sardiniense	1	0	0	0	0	0	0	0	0	0	0	0	0	0	0	0	0	0	0	0	0	0	0	0	0	0	0	1	0	0	0	0	0	0	0	0	0	0	0	0	0
Root	k__Bacteria	p__Firmicutes	c__Clostridia	o__Clostridiales	f__Clostridiaceae	g__Natronincola_Anaerovirgula	s__	1	0	0	0	0	0	0	0	0	0	0	0	0	0	0	0	0	0	0	0	0	0	0	0	0	0	0	0	0	0	0	0	0	0	0	0	0	0	0	1	0
Root	k__Bacteria	p__Firmicutes	c__Clostridia	o__Clostridiales	f__Clostridiaceae	g__Oxobacter	s__	1	0	0	0	0	0	0	0	0	0	0	0	0	0	0	0	0	0	0	0	0	0	0	1	0	0	0	0	0	0	0	0	0	0	0	0	0	0	0	0	0
Root	k__Bacteria	p__Firmicutes	c__Clostridia	o__Clostridiales	f__Clostridiaceae	g__Proteiniborus	s__ethanoligenes	1	0	0	0	0	0	0	0	0	0	0	0	0	0	0	0	0	0	0	0	0	0	0	0	0	0	0	0	0	0	0	0	1	0	0	0	0	0	0	0	0
Root	k__Bacteria	p__Firmicutes	c__Clostridia	o__Clostridiales	f__Clostridiaceae	g__Proteiniclasticum	s__	1	0	0	0	0	0	1	0	0	0	0	0	0	0	0	0	0	0	0	0	0	0	0	0	0	0	0	0	0	0	0	0	0	0	0	0	0	0	0	0	0
Root	k__Bacteria	p__Firmicutes	c__Clostridia	o__Clostridiales	f__Clostridiaceae	g__Tindallia_Anoxynatronum	s__	1	0	0	0	0	0	0	0	0	0	0	0	0	0	0	0	0	0	0	0	0	0	0	0	1	0	0	0	0	0	0	0	0	0	0	0	0	0	0	0	0
Root	k__Bacteria	p__Firmicutes	c__Clostridia	o__Clostridiales	f__Eubacteriaceae	g__Garciella	s__	1	0	0	0	0	0	0	0	0	0	0	0	0	0	0	0	0	0	0	0	0	0	0	0	0	0	0	0	0	1	0	0	0	0	0	0	0	0	0	0	0
Root	k__Bacteria	p__Firmicutes	c__Clostridia	o__Clostridiales	f__Gracilibacteraceae	g__Lutispora	s__	1	0	0	1	0	0	0	0	0	0	0	0	0	0	0	0	0	0	0	0	0	0	0	0	0	0	0	0	0	0	0	0	0	0	0	0	0	0	0	0	0
Root	k__Bacteria	p__Firmicutes	c__Clostridia	o__Clostridiales	f__JTB215	g__	s__	1	0	0	0	0	0	0	0	1	0	0	0	0	0	0	0	0	0	0	0	0	0	0	0	0	0	0	0	0	0	0	0	0	0	0	0	0	0	0	0	0
Root	k__Bacteria	p__Firmicutes	c__Clostridia	o__Clostridiales	f__Lachnospiraceae	g__Ruminococcus	s__gauvreauii	1	0	0	0	0	0	0	0	1	0	0	0	0	0	0	0	0	0	0	0	0	0	0	0	0	0	0	0	0	0	0	0	0	0	0	0	0	0	0	0	0
Root	k__Bacteria	p__Firmicutes	c__Clostridia	o__Clostridiales	f__Peptococcaceae	g__Desulfurispora	s__	1	0	0	0	0	0	0	0	0	0	0	0	0	0	0	0	0	0	0	0	0	0	0	0	0	0	0	0	0	0	0	0	0	0	1	0	0	0	0	0	0
Root	k__Bacteria	p__Firmicutes	c__Clostridia	o__Clostridiales	f__Peptococcaceae	g__Pelotomaculum	s__	1	0	0	0	0	0	0	0	0	1	0	0	0	0	0	0	0	0	0	0	0	0	0	0	0	0	0	0	0	0	0	0	0	0	0	0	0	0	0	0	0
Root	k__Bacteria	p__Firmicutes	c__Clostridia	o__Clostridiales	f__Ruminococcaceae	g__Butyricicoccus	s__pullicaecorum	1	0	0	0	0	0	0	0	0	0	0	0	0	0	0	0	0	0	0	0	0	0	0	0	0	0	0	0	0	0	0	0	0	0	0	0	0	1	0	0	0
Root	k__Bacteria	p__Firmicutes	c__Clostridia	o__Clostridiales	f__Ruminococcaceae	g__Cellulosibacter	s__alkalithermophilus	1	0	0	0	0	0	0	0	0	0	0	0	0	0	1	0	0	0	0	0	0	0	0	0	0	0	0	0	0	0	0	0	0	0	0	0	0	0	0	0	0
Root	k__Bacteria	p__Firmicutes	c__Clostridia	o__Clostridiales	f__Ruminococcaceae	g__Clostridium	s__hungatei	1	0	0	0	0	0	0	0	0	0	0	0	0	0	0	0	0	0	0	0	0	0	0	0	0	0	0	1	0	0	0	0	0	0	0	0	0	0	0	0	0
Root	k__Bacteria	p__Firmicutes	c__Clostridia	o__Clostridiales	f__Syntrophomonadaceae	g__Syntrophomonas	s__	1	0	0	0	0	0	0	0	0	0	0	0	0	0	0	0	0	0	0	0	0	0	0	0	0	0	0	0	0	0	0	0	0	0	0	0	0	0	0	0	1
Root	k__Bacteria	p__Firmicutes	c__Clostridia	o__Clostridiales	f__Veillonellaceae	g__Acetonema	s__longum	1	0	0	0	0	0	0	0	1	0	0	0	0	0	0	0	0	0	0	0	0	0	0	0	0	0	0	0	0	0	0	0	0	0	0	0	0	0	0	0	0
Root	k__Bacteria	p__Firmicutes	c__Clostridia	o__Clostridiales	f__Veillonellaceae	g__Propionispora	s__	1	0	0	0	0	0	0	0	0	0	0	0	0	0	0	0	0	0	0	0	0	0	0	0	0	0	0	0	0	0	0	0	0	0	0	0	1	0	0	0	0
Root	k__Bacteria	p__Firmicutes	c__Clostridia	o__Clostridiales	f__Veillonellaceae	g__Selenomonas	s__noxia	1	0	0	0	0	1	0	0	0	0	0	0	0	0	0	0	0	0	0	0	0	0	0	0	0	0	0	0	0	0	0	0	0	0	0	0	0	0	0	0	0
Root	k__Bacteria	p__Firmicutes	c__Clostridia	o__Clostridiales	f__[Tissierellaceae]	g__Dethiosulfatibacter	s__	1	0	0	0	0	0	0	0	0	0	0	0	0	0	0	0	0	0	0	0	0	0	0	0	0	0	0	0	0	0	0	1	0	0	0	0	0	0	0	0	0
Root	k__Bacteria	p__Firmicutes	c__Clostridia	o__Clostridiales	f__[Tissierellaceae]	g__Tepidimicrobium	s__	1	0	0	0	0	0	0	0	0	0	0	0	0	0	0	0	0	0	0	0	0	0	0	0	0	0	0	0	0	0	0	0	0	1	0	0	0	0	0	0	0
Root	k__Bacteria	p__Firmicutes	c__Clostridia	o__Halanaerobiales	f__Halanaerobiaceae	g__Halanaerobium	s__hydrogeniformans	1	0	0	0	0	0	0	0	0	0	0	0	0	0	0	0	0	0	0	0	0	0	0	0	1	0	0	0	0	0	0	0	0	0	0	0	0	0	0	0	0
Root	k__Bacteria	p__Firmicutes	c__Clostridia	o__MBA08	f__	g__	s__	1	0	0	0	0	0	0	0	0	0	0	0	0	0	0	0	0	0	0	0	0	0	0	0	0	0	0	0	0	0	1	0	0	0	0	0	0	0	0	0	0
Root	k__Bacteria	p__Firmicutes	c__Clostridia	o__OPB54	f__	g__	s__	1	0	0	0	0	0	0	0	0	0	0	0	0	0	0	0	1	0	0	0	0	0	0	0	0	0	0	0	0	0	0	0	0	0	0	0	0	0	0	0	0
Root	k__Bacteria	p__Firmicutes	c__Clostridia	o__Thermoanaerobacterales	f__Caldicellulosiruptoraceae	g__Caldicellulosiruptor	s__saccharolyticus	1	0	0	0	0	0	0	0	0	0	0	0	0	0	0	0	0	0	0	0	0	0	0	0	0	0	0	0	0	0	0	1	0	0	0	0	0	0	0	0	0
Root	k__Bacteria	p__Firmicutes	c__Clostridia	o__Thermoanaerobacterales	f__Thermoanaerobacteraceae	g__Moorella	s__	1	0	0	0	0	0	0	0	0	0	0	0	0	0	0	0	0	0	0	0	1	0	0	0	0	0	0	0	0	0	0	0	0	0	0	0	0	0	0	0	0
Root	k__Bacteria	p__Firmicutes	c__Erysipelotrichi	o__Erysipelotrichales	f__Erysipelotrichaceae	g__L7A_E11	s__	1	0	0	0	0	0	0	1	0	0	0	0	0	0	0	0	0	0	0	0	0	0	0	0	0	0	0	0	0	0	0	0	0	0	0	0	0	0	0	0	0
Root	k__Bacteria	p__OP8	c__OP8_2	o__	f__	g__	s__	1	0	0	0	0	0	0	0	1	0	0	0	0	0	0	0	0	0	0	0	0	0	0	0	0	0	0	0	0	0	0	0	0	0	0	0	0	0	0	0	0
Root	k__Bacteria	p__Proteobacteria	c__	o__	f__	g__	s__	1	0	0	0	0	0	0	0	0	0	0	0	0	0	0	0	0	0	0	0	0	0	0	0	0	0	1	0	0	0	0	0	0	0	0	0	0	0	0	0	0
Root	k__Bacteria	p__Proteobacteria	c__Alphaproteobacteria	o__Caulobacterales	f__Caulobacteraceae	g__	s__	1	0	0	0	1	0	0	0	0	0	0	0	0	0	0	0	0	0	0	0	0	0	0	0	0	0	0	0	0	0	0	0	0	0	0	0	0	0	0	0	0
Root	k__Bacteria	p__Proteobacteria	c__Alphaproteobacteria	o__Rhizobiales	f__	g__	s__	1	0	0	0	0	0	0	0	1	0	0	0	0	0	0	0	0	0	0	0	0	0	0	0	0	0	0	0	0	0	0	0	0	0	0	0	0	0	0	0	0
Root	k__Bacteria	p__Proteobacteria	c__Alphaproteobacteria	o__Rhodospirillales	f__Rhodospirillaceae	g__Azospirillum	s__	1	0	0	0	0	0	0	0	0	0	0	0	0	0	0	0	0	0	0	0	0	0	0	0	1	0	0	0	0	0	0	0	0	0	0	0	0	0	0	0	0
Root	k__Bacteria	p__Proteobacteria	c__Alphaproteobacteria	o__Rhodospirillales	f__Rhodospirillaceae	g__Rhodospirillum	s__rubrum	1	0	0	0	0	0	0	0	0	0	0	0	1	0	0	0	0	0	0	0	0	0	0	0	0	0	0	0	0	0	0	0	0	0	0	0	0	0	0	0	0
Root	k__Bacteria	p__Proteobacteria	c__Alphaproteobacteria	o__Rickettsiales	f__	g__	s__	1	0	0	1	0	0	0	0	0	0	0	0	0	0	0	0	0	0	0	0	0	0	0	0	0	0	0	0	0	0	0	0	0	0	0	0	0	0	0	0	0
Root	k__Bacteria	p__Proteobacteria	c__Alphaproteobacteria	o__Rickettsiales	f__mitochondria	g__Citrullus	s__lanatus	1	0	0	0	0	0	0	0	0	0	0	0	0	0	0	0	0	0	0	0	0	0	0	0	0	0	0	0	0	0	0	0	0	0	1	0	0	0	0	0	0
Root	k__Bacteria	p__Proteobacteria	c__Alphaproteobacteria	o__Rickettsiales	f__mitochondria	g__Victoria	s__amazonica	1	0	0	0	0	0	0	0	0	0	0	0	0	0	0	0	0	0	0	0	0	0	0	0	0	0	0	0	0	0	0	0	0	0	1	0	0	0	0	0	0
Root	k__Bacteria	p__Proteobacteria	c__Alphaproteobacteria	o__Rickettsiales	f__mitochondria	g__Zamia	s__integrifolia	1	0	0	0	0	0	0	0	0	0	0	0	0	0	0	0	0	0	0	0	0	0	0	0	0	0	0	0	0	0	0	0	0	0	0	0	0	0	1	0	0
Root	k__Bacteria	p__Proteobacteria	c__Betaproteobacteria	o__Burkholderiales	f__Alcaligenaceae	g__Alcaligenes	s__faecalis	1	0	0	0	0	0	0	0	1	0	0	0	0	0	0	0	0	0	0	0	0	0	0	0	0	0	0	0	0	0	0	0	0	0	0	0	0	0	0	0	0
Root	k__Bacteria	p__Proteobacteria	c__Betaproteobacteria	o__Burkholderiales	f__Alcaligenaceae	g__Pigmentiphaga	s__	1	0	0	0	0	0	0	0	0	0	0	0	0	0	0	0	0	0	0	0	0	0	0	0	1	0	0	0	0	0	0	0	0	0	0	0	0	0	0	0	0
Root	k__Bacteria	p__Proteobacteria	c__Betaproteobacteria	o__Burkholderiales	f__Burkholderiaceae	g__Salinispora	s__	1	0	0	0	0	0	0	0	0	1	0	0	0	0	0	0	0	0	0	0	0	0	0	0	0	0	0	0	0	0	0	0	0	0	0	0	0	0	0	0	0
Root	k__Bacteria	p__Proteobacteria	c__Betaproteobacteria	o__Burkholderiales	f__Burkholderiaceae	g__Salinispora	s__tropica	1	0	0	0	0	0	0	0	0	0	0	0	0	0	0	0	0	0	0	0	0	1	0	0	0	0	0	0	0	0	0	0	0	0	0	0	0	0	0	0	0
Root	k__Bacteria	p__Proteobacteria	c__Betaproteobacteria	o__Burkholderiales	f__Comamonadaceae	g__Rubrivivax	s__	1	0	0	0	0	0	0	0	0	0	1	0	0	0	0	0	0	0	0	0	0	0	0	0	0	0	0	0	0	0	0	0	0	0	0	0	0	0	0	0	0
Root	k__Bacteria	p__Proteobacteria	c__Betaproteobacteria	o__Burkholderiales	f__Comamonadaceae	g__Schlegelella	s__	1	0	0	0	0	0	0	0	0	0	0	0	1	0	0	0	0	0	0	0	0	0	0	0	0	0	0	0	0	0	0	0	0	0	0	0	0	0	0	0	0
Root	k__Bacteria	p__Proteobacteria	c__Betaproteobacteria	o__Burkholderiales	f__Comamonadaceae	g__Variovorax	s__paradoxus	1	0	0	0	0	0	0	0	0	0	0	0	1	0	0	0	0	0	0	0	0	0	0	0	0	0	0	0	0	0	0	0	0	0	0	0	0	0	0	0	0
Root	k__Bacteria	p__Proteobacteria	c__Betaproteobacteria	o__Burkholderiales	f__Oxalobacteraceae	g__Collimonas	s__	1	0	0	0	0	0	0	0	0	0	0	0	0	0	0	0	0	0	0	0	0	0	1	0	0	0	0	0	0	0	0	0	0	0	0	0	0	0	0	0	0
Root	k__Bacteria	p__Proteobacteria	c__Betaproteobacteria	o__Burkholderiales	f__Oxalobacteraceae	g__Herminiimonas	s__	1	0	0	0	0	0	0	1	0	0	0	0	0	0	0	0	0	0	0	0	0	0	0	0	0	0	0	0	0	0	0	0	0	0	0	0	0	0	0	0	0
Root	k__Bacteria	p__Proteobacteria	c__Betaproteobacteria	o__Gallionellales	f__Gallionellaceae	g__Gallionella	s__	1	0	0	0	0	0	0	0	0	0	0	0	0	0	0	0	0	0	0	0	0	0	0	0	0	0	0	0	0	0	0	0	0	0	0	0	0	1	0	0	0
Root	k__Bacteria	p__Proteobacteria	c__Betaproteobacteria	o__Neisseriales	f__Neisseriaceae	g__Microvirgula	s__	1	0	0	0	0	0	0	0	1	0	0	0	0	0	0	0	0	0	0	0	0	0	0	0	0	0	0	0	0	0	0	0	0	0	0	0	0	0	0	0	0
Root	k__Bacteria	p__Proteobacteria	c__Betaproteobacteria	o__Neisseriales	f__Neisseriaceae	g__Neisseria	s__cinerea	1	0	0	0	0	0	0	0	1	0	0	0	0	0	0	0	0	0	0	0	0	0	0	0	0	0	0	0	0	0	0	0	0	0	0	0	0	0	0	0	0
Root	k__Bacteria	p__Proteobacteria	c__Betaproteobacteria	o__Nitrosomonadales	f__	g__	s__	1	0	0	0	0	1	0	0	0	0	0	0	0	0	0	0	0	0	0	0	0	0	0	0	0	0	0	0	0	0	0	0	0	0	0	0	0	0	0	0	0
Root	k__Bacteria	p__Proteobacteria	c__Betaproteobacteria	o__Rhodocyclales	f__Rhodocyclaceae	g__Azoarcus	s__	1	0	0	0	0	0	0	0	0	0	0	0	0	0	0	0	0	0	0	0	0	0	0	0	0	0	0	0	0	0	0	0	0	0	0	0	0	0	1	0	0
Root	k__Bacteria	p__Proteobacteria	c__Betaproteobacteria	o__Rhodocyclales	f__Rhodocyclaceae	g__CandidatusAccumulibacter	s__	1	0	0	0	0	0	0	0	0	0	0	0	0	0	0	0	0	0	0	0	0	0	0	0	0	0	0	0	0	0	0	0	0	0	0	0	0	0	0	1	0
Root	k__Bacteria	p__Proteobacteria	c__Betaproteobacteria	o__Rhodocyclales	f__Rhodocyclaceae	g__Propionivibrio	s__	1	0	0	0	0	0	0	0	0	0	0	0	0	0	0	0	0	0	0	0	0	0	0	0	0	0	1	0	0	0	0	0	0	0	0	0	0	0	0	0	0
Root	k__Bacteria	p__Proteobacteria	c__Betaproteobacteria	o__Rhodocyclales	f__Rhodocyclaceae	g__Sterolibacterium	s__	1	0	0	0	0	0	0	0	1	0	0	0	0	0	0	0	0	0	0	0	0	0	0	0	0	0	0	0	0	0	0	0	0	0	0	0	0	0	0	0	0
Root	k__Bacteria	p__Proteobacteria	c__Betaproteobacteria	o__Rhodocyclales	f__Rhodocyclaceae	g__Uliginosibacterium	s__	1	0	0	0	0	0	0	0	0	0	0	0	0	0	0	0	0	0	0	0	0	0	0	0	0	1	0	0	0	0	0	0	0	0	0	0	0	0	0	0	0
Root	k__Bacteria	p__Proteobacteria	c__Betaproteobacteria	o__Tremblayales	f__Tremblayaceae	g__	s__	1	0	0	0	0	0	0	0	0	0	0	0	0	0	0	0	0	0	0	0	0	0	0	0	0	0	0	0	0	0	0	0	0	0	0	0	1	0	0	0	0
Root	k__Bacteria	p__Proteobacteria	c__Deltaproteobacteria	o__DTB120	f__	g__	s__	1	0	0	0	0	0	0	0	0	0	0	0	0	1	0	0	0	0	0	0	0	0	0	0	0	0	0	0	0	0	0	0	0	0	0	0	0	0	0	0	0
Root	k__Bacteria	p__Proteobacteria	c__Deltaproteobacteria	o__Desulfovibrionales	f__Desulfovibrionaceae	g__Desulfovibrio	s__litoralis	1	0	0	0	0	0	0	0	0	0	0	0	0	0	0	0	0	0	0	0	0	0	0	0	0	0	0	0	0	0	1	0	0	0	0	0	0	0	0	0	0
Root	k__Bacteria	p__Proteobacteria	c__Deltaproteobacteria	o__Desulfovibrionales	f__Desulfovibrionaceae	g__Lawsonia	s__	1	0	0	0	0	1	0	0	0	0	0	0	0	0	0	0	0	0	0	0	0	0	0	0	0	0	0	0	0	0	0	0	0	0	0	0	0	0	0	0	0
Root	k__Bacteria	p__Proteobacteria	c__Deltaproteobacteria	o__Myxococcales	f__	g__	s__	1	0	0	0	0	0	0	0	0	0	0	0	0	0	0	0	0	0	0	0	0	0	0	0	0	0	0	1	0	0	0	0	0	0	0	0	0	0	0	0	0
Root	k__Bacteria	p__Proteobacteria	c__Deltaproteobacteria	o__PB19	f__	g__	s__	1	0	0	0	0	0	0	0	0	0	0	0	0	0	0	0	0	0	0	0	0	0	0	1	0	0	0	0	0	0	0	0	0	0	0	0	0	0	0	0	0
Root	k__Bacteria	p__Proteobacteria	c__Deltaproteobacteria	o__Spirobacillales	f__	g__	s__	1	0	0	0	0	0	0	0	0	0	0	1	0	0	0	0	0	0	0	0	0	0	0	0	0	0	0	0	0	0	0	0	0	0	0	0	0	0	0	0	0
Root	k__Bacteria	p__Proteobacteria	c__Deltaproteobacteria	o__Sva0853	f__SAR324	g__	s__	1	0	0	1	0	0	0	0	0	0	0	0	0	0	0	0	0	0	0	0	0	0	0	0	0	0	0	0	0	0	0	0	0	0	0	0	0	0	0	0	0
Root	k__Bacteria	p__Proteobacteria	c__Epsilonproteobacteria	o__	f__	g__	s__	1	0	0	0	0	0	0	0	0	0	0	0	0	0	0	0	0	0	0	0	0	0	0	0	0	0	0	1	0	0	0	0	0	0	0	0	0	0	0	0	0
Root	k__Bacteria	p__Proteobacteria	c__Gammaproteobacteria	o__34P16	f__	g__	s__	1	0	0	0	0	0	0	0	0	0	0	0	0	0	0	0	0	0	0	0	0	0	0	0	0	0	0	0	1	0	0	0	0	0	0	0	0	0	0	0	0
Root	k__Bacteria	p__Proteobacteria	c__Gammaproteobacteria	o__Alteromonadales	f__Alteromonadaceae	g__Glaciecola	s__	1	0	0	0	0	0	0	0	0	0	0	0	0	0	0	0	0	0	0	0	0	0	0	0	0	0	0	0	0	0	1	0	0	0	0	0	0	0	0	0	0
Root	k__Bacteria	p__Proteobacteria	c__Gammaproteobacteria	o__Alteromonadales	f__Alteromonadaceae	g__HB2-32-21	s__	1	0	0	0	0	0	0	0	0	0	0	1	0	0	0	0	0	0	0	0	0	0	0	0	0	0	0	0	0	0	0	0	0	0	0	0	0	0	0	0	0
Root	k__Bacteria	p__Proteobacteria	c__Gammaproteobacteria	o__Alteromonadales	f__Alteromonadaceae	g__Marinobacter	s__	1	0	0	0	0	0	0	0	0	0	0	0	0	0	0	0	0	0	0	0	0	0	0	0	0	0	0	0	1	0	0	0	0	0	0	0	0	0	0	0	0
Root	k__Bacteria	p__Proteobacteria	c__Gammaproteobacteria	o__Alteromonadales	f__Idiomarinaceae	g__Pseudidiomarina	s__	1	0	0	0	0	0	0	0	0	0	0	0	0	0	0	0	0	0	0	0	0	0	0	0	0	0	0	0	1	0	0	0	0	0	0	0	0	0	0	0	0
Root	k__Bacteria	p__Proteobacteria	c__Gammaproteobacteria	o__Alteromonadales	f__[Chromatiaceae]	g__	s__	1	0	0	0	0	0	0	0	0	0	0	0	0	0	0	0	0	0	0	0	0	0	0	0	0	0	0	1	0	0	0	0	0	0	0	0	0	0	0	0	0
Root	k__Bacteria	p__Proteobacteria	c__Gammaproteobacteria	o__Cardiobacteriales	f__Cardiobacteriaceae	g__Cardiobacterium	s__	1	0	0	0	0	0	0	0	0	0	0	0	0	0	0	0	0	0	0	0	0	0	0	0	0	0	0	0	1	0	0	0	0	0	0	0	0	0	0	0	0
Root	k__Bacteria	p__Proteobacteria	c__Gammaproteobacteria	o__Chromatiales	f__Chromatiaceae	g__Nitrosococcus	s__	1	0	0	0	0	0	0	0	0	0	0	0	0	0	0	0	0	0	0	0	0	0	0	0	0	0	0	0	0	0	0	0	1	0	0	0	0	0	0	0	0
Root	k__Bacteria	p__Proteobacteria	c__Gammaproteobacteria	o__Enterobacteriales	f__Enterobacteriaceae	g__Aquamonas	s__haywardensis	1	0	0	0	0	0	0	0	0	0	0	0	0	0	0	0	0	0	0	0	0	0	0	0	0	0	0	1	0	0	0	0	0	0	0	0	0	0	0	0	0
Root	k__Bacteria	p__Proteobacteria	c__Gammaproteobacteria	o__Enterobacteriales	f__Enterobacteriaceae	g__Brenneria	s__salicis	1	0	0	0	0	0	0	0	0	0	0	0	0	0	0	0	0	0	0	0	0	0	0	0	0	0	0	1	0	0	0	0	0	0	0	0	0	0	0	0	0
Root	k__Bacteria	p__Proteobacteria	c__Gammaproteobacteria	o__Enterobacteriales	f__Enterobacteriaceae	g__Buchnera	s__aphidicola	1	0	0	0	0	0	0	0	0	0	0	0	0	0	0	0	0	0	0	0	0	0	0	0	0	0	0	1	0	0	0	0	0	0	0	0	0	0	0	0	0
Root	k__Bacteria	p__Proteobacteria	c__Gammaproteobacteria	o__Enterobacteriales	f__Enterobacteriaceae	g__Enterobacter	s__ludwigii	1	0	0	0	0	0	0	0	0	0	0	0	0	0	0	0	0	0	0	0	0	0	0	0	0	0	0	0	1	0	0	0	0	0	0	0	0	0	0	0	0
Root	k__Bacteria	p__Proteobacteria	c__Gammaproteobacteria	o__Enterobacteriales	f__Enterobacteriaceae	g__Enterobacter	s__radicincitans	1	0	0	0	0	0	0	0	0	0	0	0	0	0	0	0	0	0	0	0	0	0	0	0	0	0	0	0	1	0	0	0	0	0	0	0	0	0	0	0	0
Root	k__Bacteria	p__Proteobacteria	c__Gammaproteobacteria	o__Enterobacteriales	f__Enterobacteriaceae	g__Escherichia	s__coli	1	0	0	0	0	0	0	0	0	0	0	0	0	0	0	0	0	0	0	0	0	0	0	0	0	0	0	0	1	0	0	0	0	0	0	0	0	0	0	0	0
Root	k__Bacteria	p__Proteobacteria	c__Gammaproteobacteria	o__Enterobacteriales	f__Enterobacteriaceae	g__Gluconacetobacter	s__liquefaciens	1	0	0	0	0	0	0	0	0	0	0	0	0	0	0	0	0	0	0	0	0	0	0	0	0	0	0	0	1	0	0	0	0	0	0	0	0	0	0	0	0
Root	k__Bacteria	p__Proteobacteria	c__Gammaproteobacteria	o__Enterobacteriales	f__Enterobacteriaceae	g__Photorhabdus	s__temperata	1	0	0	0	0	0	0	0	0	0	0	0	0	0	0	0	0	0	0	0	0	0	0	0	0	0	0	0	1	0	0	0	0	0	0	0	0	0	0	0	0
Root	k__Bacteria	p__Proteobacteria	c__Gammaproteobacteria	o__Enterobacteriales	f__Enterobacteriaceae	g__Raoultella	s__terrigena	1	0	0	0	0	0	0	0	0	0	0	0	0	0	0	0	0	0	0	0	0	0	0	0	0	0	0	0	1	0	0	0	0	0	0	0	0	0	0	0	0
Root	k__Bacteria	p__Proteobacteria	c__Gammaproteobacteria	o__Enterobacteriales	f__Enterobacteriaceae	g__Serratia	s__rubidaea	1	0	0	0	0	0	0	0	0	0	0	0	0	0	0	0	0	0	0	0	0	0	0	0	0	0	0	0	1	0	0	0	0	0	0	0	0	0	0	0	0
Root	k__Bacteria	p__Proteobacteria	c__Gammaproteobacteria	o__Enterobacteriales	f__Enterobacteriaceae	g__Xenorhabdus	s__budapestensis	1	0	0	0	0	0	0	0	0	0	0	0	0	0	0	0	0	0	0	0	0	0	0	0	0	0	0	1	0	0	0	0	0	0	0	0	0	0	0	0	0
Root	k__Bacteria	p__Proteobacteria	c__Gammaproteobacteria	o__Enterobacteriales	f__Enterobacteriaceae	g__Xenorhabdus	s__poinarii	1	0	0	0	0	0	0	0	0	0	0	0	0	0	0	0	0	0	0	0	0	0	0	0	0	0	0	0	1	0	0	0	0	0	0	0	0	0	0	0	0
Root	k__Bacteria	p__Proteobacteria	c__Gammaproteobacteria	o__Enterobacteriales	f__Enterobacteriaceae	g__Xenorhabdus	s__romanii	1	0	0	0	0	0	0	0	0	0	0	0	0	0	0	0	0	0	0	0	0	0	0	0	0	0	0	0	1	0	0	0	0	0	0	0	0	0	0	0	0
Root	k__Bacteria	p__Proteobacteria	c__Gammaproteobacteria	o__Legionellales	f__Legionellaceae	g__Tatlockia	s__	1	0	0	1	0	0	0	0	0	0	0	0	0	0	0	0	0	0	0	0	0	0	0	0	0	0	0	0	0	0	0	0	0	0	0	0	0	0	0	0	0
Root	k__Bacteria	p__Proteobacteria	c__Gammaproteobacteria	o__Oceanospirillales	f__Alcanivoracaceae	g__Alcanivorax	s__	1	0	0	0	0	0	0	0	0	0	0	0	0	0	0	0	0	0	0	0	0	0	0	0	0	0	0	0	1	0	0	0	0	0	0	0	0	0	0	0	0
Root	k__Bacteria	p__Proteobacteria	c__Gammaproteobacteria	o__Oceanospirillales	f__Alcanivoracaceae	g__Alcanivorax	s__venustensis	1	0	0	0	0	0	0	0	0	0	0	0	0	0	0	0	0	0	0	0	0	0	0	0	0	0	0	0	1	0	0	0	0	0	0	0	0	0	0	0	0
Root	k__Bacteria	p__Proteobacteria	c__Gammaproteobacteria	o__Oceanospirillales	f__Hahellaceae	g__Hahella	s__	1	0	0	0	0	0	0	0	0	0	0	0	0	0	0	0	0	0	0	0	0	0	0	0	0	0	0	1	0	0	0	0	0	0	0	0	0	0	0	0	0
Root	k__Bacteria	p__Proteobacteria	c__Gammaproteobacteria	o__Oceanospirillales	f__Halomonadaceae	g__CandidatusPortiera	s__	1	1	0	0	0	0	0	0	0	0	0	0	0	0	0	0	0	0	0	0	0	0	0	0	0	0	0	0	0	0	0	0	0	0	0	0	0	0	0	0	0
Root	k__Bacteria	p__Proteobacteria	c__Gammaproteobacteria	o__Pasteurellales	f__Pasteurellaceae	g__Aggregatibacter	s__segnis	1	0	0	0	0	0	0	0	0	0	0	0	0	0	0	0	1	0	0	0	0	0	0	0	0	0	0	0	0	0	0	0	0	0	0	0	0	0	0	0	0
Root	k__Bacteria	p__Proteobacteria	c__Gammaproteobacteria	o__Pasteurellales	f__Pasteurellaceae	g__Gallibacterium	s__	1	0	0	0	0	0	0	0	0	0	0	0	0	0	0	0	0	0	0	0	0	0	0	0	0	0	0	0	1	0	0	0	0	0	0	0	0	0	0	0	0
Root	k__Bacteria	p__Proteobacteria	c__Gammaproteobacteria	o__Pasteurellales	f__Pasteurellaceae	g__Haemophilus	s__felis	1	0	0	0	0	0	0	0	0	0	1	0	0	0	0	0	0	0	0	0	0	0	0	0	0	0	0	0	0	0	0	0	0	0	0	0	0	0	0	0	0
Root	k__Bacteria	p__Proteobacteria	c__Gammaproteobacteria	o__Pasteurellales	f__Pasteurellaceae	g__Haemophilus	s__influenzae	1	0	0	0	0	0	0	0	0	0	0	0	0	0	0	0	0	0	0	0	0	0	0	0	0	0	1	0	0	0	0	0	0	0	0	0	0	0	0	0	0
Root	k__Bacteria	p__Proteobacteria	c__Gammaproteobacteria	o__Pasteurellales	f__Pasteurellaceae	g__Necropsobacter	s__rosorum	1	0	0	0	0	0	0	0	0	0	0	0	0	0	0	0	0	0	0	0	0	0	0	0	0	0	0	0	0	1	0	0	0	0	0	0	0	0	0	0	0
Root	k__Bacteria	p__Proteobacteria	c__Gammaproteobacteria	o__Pseudomonadales	f__Moraxellaceae	g__Acinetobacter	s__rhizosphaerae	1	0	0	0	0	0	0	0	0	0	0	0	0	0	0	0	0	0	0	0	0	0	0	0	0	0	0	0	1	0	0	0	0	0	0	0	0	0	0	0	0
Root	k__Bacteria	p__Proteobacteria	c__Gammaproteobacteria	o__Pseudomonadales	f__Moraxellaceae	g__Moraxella	s__	1	0	0	0	0	0	0	0	0	0	0	0	0	0	0	0	0	0	0	0	0	0	0	0	0	0	0	1	0	0	0	0	0	0	0	0	0	0	0	0	0
Root	k__Bacteria	p__Proteobacteria	c__Gammaproteobacteria	o__Pseudomonadales	f__Pseudomonadaceae	g__Pseudomonas	s__viridiflava	1	0	0	0	0	0	0	1	0	0	0	0	0	0	0	0	0	0	0	0	0	0	0	0	0	0	0	0	0	0	0	0	0	0	0	0	0	0	0	0	0
Root	k__Bacteria	p__Proteobacteria	c__Gammaproteobacteria	o__Thiotrichales	f__Piscirickettsiaceae	g__	s__	1	0	0	0	0	0	0	0	1	0	0	0	0	0	0	0	0	0	0	0	0	0	0	0	0	0	0	0	0	0	0	0	0	0	0	0	0	0	0	0	0
Root	k__Bacteria	p__Proteobacteria	c__Gammaproteobacteria	o__Thiotrichales	f__Thiotrichaceae	g__Thiopilula	s__aggregata	1	0	0	0	0	0	0	0	0	0	0	0	0	0	0	0	0	0	0	0	0	0	0	0	0	0	0	1	0	0	0	0	0	0	0	0	0	0	0	0	0
Root	k__Bacteria	p__Proteobacteria	c__Gammaproteobacteria	o__Thiotrichales	f__Thiotrichaceae	g__Thiothrix	s__	1	0	0	0	0	0	0	0	0	0	0	0	0	0	0	0	0	0	0	0	0	0	0	0	0	0	0	0	0	0	0	1	0	0	0	0	0	0	0	0	0
Root	k__Bacteria	p__Proteobacteria	c__Gammaproteobacteria	o__Xanthomonadales	f__Xanthomonadaceae	g__Pseudoxanthomonas	s__mexicana	1	0	0	0	0	0	0	0	0	0	0	0	0	0	0	0	0	0	0	0	0	0	0	0	0	0	0	0	1	0	0	0	0	0	0	0	0	0	0	0	0
Root	k__Bacteria	p__Spirochaetes	c__Spirochaetes	o__Sphaerochaetales	f__Sphaerochaetaceae	g__	s__	1	0	0	0	0	0	0	0	0	0	0	0	0	0	0	0	0	0	0	0	0	0	0	0	0	0	0	0	0	0	0	0	0	0	1	0	0	0	0	0	0
Root	k__Bacteria	p__Synergistetes	c__Synergistia	o__Synergistales	f__Dethiosulfovibrionaceae	g__Aminobacterium	s__	1	0	0	1	0	0	0	0	0	0	0	0	0	0	0	0	0	0	0	0	0	0	0	0	0	0	0	0	0	0	0	0	0	0	0	0	0	0	0	0	0
Root	k__Bacteria	p__Synergistetes	c__Synergistia	o__Synergistales	f__Dethiosulfovibrionaceae	g__Jonquetella	s__anthropi	1	0	0	0	0	0	0	0	0	0	0	0	1	0	0	0	0	0	0	0	0	0	0	0	0	0	0	0	0	0	0	0	0	0	0	0	0	0	0	0	0
Root	k__Bacteria	p__Synergistetes	c__Synergistia	o__Synergistales	f__Dethiosulfovibrionaceae	g__Pyramidobacter	s__	1	0	0	0	0	1	0	0	0	0	0	0	0	0	0	0	0	0	0	0	0	0	0	0	0	0	0	0	0	0	0	0	0	0	0	0	0	0	0	0	0
Root	k__Bacteria	p__Synergistetes	c__Synergistia	o__Synergistales	f__Synergistaceae	g__	s__	1	0	0	0	0	0	0	0	0	0	0	0	0	0	0	0	0	0	0	0	0	0	0	0	0	0	0	0	0	0	0	1	0	0	0	0	0	0	0	0	0
Root	k__Bacteria	p__Synergistetes	c__Synergistia	o__Synergistales	f__Synergistaceae	g__Cloacibacillus	s__	1	0	1	0	0	0	0	0	0	0	0	0	0	0	0	0	0	0	0	0	0	0	0	0	0	0	0	0	0	0	0	0	0	0	0	0	0	0	0	0	0
Root	k__Bacteria	p__Synergistetes	c__Synergistia	o__Synergistales	f__Synergistaceae	g__vadinCA02	s__	1	0	0	0	0	0	0	0	0	0	0	0	0	0	0	0	0	0	0	0	0	0	0	0	0	0	0	0	0	0	0	0	1	0	0	0	0	0	0	0	0
Root	k__Bacteria	p__Synergistetes	c__Synergistia	o__Synergistales	f__TTA_B6	g__E6	s__	1	0	0	0	0	0	0	0	0	0	0	0	0	0	0	0	0	0	0	0	0	0	0	0	0	0	0	0	0	0	0	0	1	0	0	0	0	0	0	0	0
Root	k__Bacteria	p__TM7	c__TM7-3	o__I025	f__	g__	s__	1	0	0	0	0	0	0	0	0	0	0	0	0	0	0	0	0	0	0	0	0	0	0	0	0	0	0	0	0	1	0	0	0	0	0	0	0	0	0	0	0
Root	k__Bacteria	p__Tenericutes	c__Mollicutes	o__Mycoplasmatales	f__Mycoplasmataceae	g__Mycoplasma	s__	1	0	0	0	0	0	0	0	0	0	0	0	0	0	0	0	0	0	0	0	0	0	0	0	0	0	0	0	0	0	0	0	1	0	0	0	0	0	0	0	0
Root	k__Bacteria	p__Verrucomicrobia	c__Verrucomicrobiae	o__Verrucomicrobiales	f__Verrucomicrobiaceae	g__Verrucomicrobium	s__	1	0	0	0	0	0	0	0	0	0	0	0	0	0	0	0	0	0	0	0	0	0	0	0	1	0	0	0	0	0	0	0	0	0	0	0	0	0	0	0	0
Root	k__Bacteria	p__Verrucomicrobia	c__[Pedosphaerae]	o__[Pedosphaerales]	f__	g__	s__	1	0	0	0	0	0	0	0	0	0	0	0	0	0	0	0	0	0	0	0	0	0	0	0	1	0	0	0	0	0	0	0	0	0	0	0	0	0	0	0	0
Root	k__Bacteria	p__WS2	c__Kazan-3B-09	o__	f__	g__	s__	1	0	0	0	0	0	0	0	0	0	0	0	0	0	0	0	0	0	0	0	0	0	0	0	0	0	0	1	0	0	0	0	0	0	0	0	0	0	0	0	0
Root	k__Bacteria	p__[Thermi]	c__Deinococci	o__Thermales	f__Thermaceae	g__Meiothermus	s__	1	0	0	0	0	0	0	0	0	0	0	0	0	0	0	0	0	0	0	0	0	0	0	0	0	0	0	0	0	0	0	0	0	1	0	0	0	0	0	0	0

## Sheet: EBI tsv usX
ERP008951_taxonomy_abundances_v2.0.tsv				26	73	186	481	716	24964	28369	28496	32288	31317	30685	49923	48214	23086	21772	46403	44862	32258	30582	9361	9217	22516	21725	28223	27145	32583	31501	28360	27238	35648	34705	75668	73030	15187	15310	22520	23107	44878	45379	23980	23791	19445	19324	31762	32074
EBI-provided taxonomic profile				0.19697			0.671788
#SampleID	Kingdom	Phylum	Class	Order	Family	Genus	Species	Sum	ERR695598	ERR695599	ERR695600	ERR695601	ERR695602	ERR695603	ERR695604	ERR695605	ERR695606	ERR695607	ERR695608	ERR695609	ERR695610	ERR695611	ERR695612	ERR695613	ERR695614	ERR695615	ERR695616	ERR695617	ERR695618	ERR695619	ERR695620	ERR695621	ERR695622	ERR695623	ERR695624	ERR695625	ERR695626	ERR695627	ERR695628	ERR695629	ERR695630	ERR695631	ERR695632	ERR695633	ERR695634	ERR695635	ERR695636	ERR695637
Root	Unclassified_k	Unclassified_p	Unclassified_c	Unclassified_o	Unclassified_f	Unclassified_g	Unclassified_sp	96675	1646	1824	2189	2467	1897	1959	2688	2708	1422	1371	2909	2893	2315	2216	502	531	1589	1527	1998	1929	2325	2435	5677	5612	2446	2497	3936	4028	3016	2920	1787	1799	3635	3620	1611	1652	1750	1716	2827	2806
Root	Bacteria	Bacteroidetes	Bacteroidia	Bacteroidales	Bacteroidaceae	Bacteroides	Bacteroides_sp	242238	6056	6901	3766	4118	8459	8062	8374	8206	4959	4733	14832	14422	3417	3274	224	211	2716	2705	3383	3239	15674	15236	2662	2404	17400	16941	13402	12977	1244	1181	2813	3025	4211	4509	2496	2392	2157	2213	3598	3646
Root	Bacteria	Firmicutes	Clostridia	Clostridiales	Lachnospiraceae	Lachnospiraceae_g	Lachnospiraceae_sp	100484	2335	2697	4669	5410	2413	2459	7423	7036	2077	1874	3347	3171	2303	2158	1114	1181	1653	1553	2190	2066	803	844	1228	1253	911	863	3676	3548	625	658	1959	1998	5766	5827	2270	2111	1464	1455	2078	2018
Root	Bacteria	Bacteroidetes	Bacteroidia	Bacteroidales	Prevotellaceae	Prevotella	Prevotella copri	86982	197	215	290	301	152	127	1208	1172	1235	1168	1808	1722	3008	2964	422	430	3024	2924	3797	3682	4363	4033	351	363	4872	4595	2732	2594	111	114	505	495	5386	5519	3518	3696	135	127	6791	6836
Root	Bacteria	Firmicutes	Clostridia	Clostridiales	Ruminococcaceae	Faecalibacterium	Faecalibacterium prausnitzii	70676	1942	2135	1946	2304	3022	2869	4649	4376	1315	1107	1962	1799	1580	1517	600	490	1950	1833	2495	2345	7	8	166	143	14	6	6497	6244	64	67	2098	2231	2179	2236	1041	1061	1020	917	1247	1194
Root	Bacteria	Firmicutes	Clostridia	Clostridiales	Ruminococcaceae	Ruminococcaceae_g	Ruminococcaceae_sp	68736	1820	2124	2765	3098	1593	1577	2400	2360	1578	1588	2995	2851	3197	3072	1234	1106	1741	1729	2058	2073	130	117	2750	2550	154	122	1481	1424	970	912	2214	2375	1561	1477	2146	2132	682	719	911	950
Root	Bacteria	Firmicutes	Clostridia	Clostridiales	Clostridiales_f	Clostridiales_g	Clostridiales_sp	67346	1599	1753	2953	3349	1567	1560	2443	2379	1451	1411	2264	2251	1909	1670	788	802	1183	1212	1439	1460	210	200	4811	4591	222	228	1954	1923	2585	2612	1132	1004	2254	2203	1379	1356	987	939	658	655
Root	Bacteria	Firmicutes	Clostridia	Clostridiales	Lachnospiraceae	Lachnospira	Lachnospira_sp	38338	1169	1247	577	662	2014	1888	3073	2906	692	670	1824	1824	1554	1449	483	492	645	599	707	703	344	311	52	59	394	327	928	971	51	51	198	204	1632	1599	920	885	915	939	1183	1197
Root	Bacteria	Proteobacteria	Gammaproteobacteria	Enterobacteriales	Enterobacteriaceae	Enterobacteriaceae_g	Enterobacteriaceae_sp	30687	4	8	13	21	4	7	3	1	11	4	3	2	6	5	6	20	13	28	18	18	2	8	227	247	6	10	15033	14275	154	150	44	49	41	52	11	11	63	47	35	27
Root	Bacteria	Bacteroidetes	Bacteroidia	Bacteroidales	Bacteroidaceae	Bacteroides	Bacteroides uniformis	24942	1166	1276	318	366	1630	1709	1034	1041	286	216	586	551	288	279	12	13	309	303	329	329	842	783	985	991	916	884	1814	1709	744	822	552	560	185	183	319	265	138	162	22	25
Root	Bacteria	Firmicutes	Clostridia	Clostridiales	Lachnospiraceae	Blautia	Blautia_sp	24770	388	473	673	821	490	514	1573	1564	286	274	1015	990	250	247	607	646	336	364	462	455	262	223	142	139	219	240	813	699	43	39	438	487	2253	2263	924	893	414	409	677	765
Root	Bacteria	Proteobacteria	Betaproteobacteria	Burkholderiales	Sutterellaceae	Sutterella	Sutterella_sp	24151	396	460	335	374	440	489	1467	1464	716	627	928	952	158	164	16	6	182	156	196	205	1996	1905	145	122	2070	2057	392	340	29	41	349	429	624	688	197	216	890	926	524	480
Root	Bacteria	Bacteroidetes	Bacteroidia	Bacteroidales	Porphyromonadaceae	Parabacteroides	Parabacteroides_sp	23702	423	546	245	250	912	840	625	565	204	196	587	557	280	273	12	6	217	218	247	265	945	981	966	988	1029	1049	474	448	782	796	259	278	225	241	80	75	3192	2989	211	226
Root	Bacteria	Firmicutes	Clostridia	Clostridiales	Lachnospiraceae	Coprococcus	Coprococcus_sp	21015	425	474	551	539	635	578	1358	1326	335	325	755	696	745	665	380	359	448	440	554	574	132	126	336	307	129	125	636	526	147	125	447	426	1438	1423	594	582	279	300	392	383
Root	Bacteria	Firmicutes	Clostridia	Clostridiales	Ruminococcaceae	Ruminococcus	Ruminococcus_sp	20449	482	611	1577	1714	316	300	338	332	1092	1063	1028	1013	798	787	199	182	826	751	1082	936	40	46	475	509	54	58	99	84	267	309	536	540	245	240	386	345	181	192	213	203
Root	Bacteria	Bacteroidetes	Bacteroidia	Bacteroidales	Prevotellaceae	Prevotella	Prevotella_sp	15063	40	55	51	65	58	62	70	78	114	108	128	98	646	656	43	65	648	649	776	729	122	131	58	39	142	152	101	123	47	50	29	36	1719	1656	478	436	30	27	2247	2301
Root	Bacteria	Firmicutes	Clostridia	Clostridiales	Lachnospiraceae	Roseburia	Roseburia_sp	13965	146	172	140	172	139	177	1386	1302	354	337	444	459	188	176	255	268	118	127	155	147	81	70	27	19	85	68	1433	1513	17	15	232	217	799	885	376	401	401	393	147	124
Root	Bacteria	Bacteroidetes	Bacteroidia	Bacteroidales	Porphyromonadaceae	Parabacteroides	Parabacteroides distasonis	13588	51	67	113	139	49	47	623	606	124	97	206	241	96	77	5	4	130	131	127	161	1707	1594	337	339	1739	1736	1040	1121	213	209	99	103	42	25	11	11	72	87	6	3
Root	Bacteria	Bacteroidetes	Bacteroidia	Bacteroidales	Rikenellaceae	Rikenellaceae_g	Rikenellaceae_sp	13216	393	465	442	430	464	459	161	168	358	362	551	554	347	352	12	10	379	352	490	431	5	2	1136	1129	6	15	127	149	895	1002	432	383	99	85	131	97	166	161	7	9
Root	Bacteria	Firmicutes	Clostridia	Clostridiales	Ruminococcaceae	Oscillospira	Oscillospira_sp	12402	283	368	184	247	424	376	444	449	154	153	705	639	595	532	134	128	351	304	379	390	16	14	936	875	15	21	232	200	399	377	273	279	201	194	236	251	157	186	146	155
Root	Bacteria	Firmicutes	Negativicutes	Veillonellales	Veillonellaceae	Dialister	Dialister_sp	11469	177	188	45	46	315	284	152	139	85	80	66	87	1181	1192	357	330	560	497	851	769	174	160	44	46	165	185	120	107	8	17	442	432	126	146	675	681	179	200	83	78
Root	Bacteria	Firmicutes	Negativicutes	Selenomonadales	Selenomonadaceae	Megamonas	Megamonas_sp	9059	0	0	0	0	0	1	0	0	191	177	857	811	10	14	290	251	28	22	16	27	0	0	0	0	0	0	0	0	4	15	11	6	1229	1165	433	487	31	13	1436	1534
Root	Bacteria	Proteobacteria	Gammaproteobacteria	Enterobacteriales	Enterobacteriaceae	Klebsiella	Klebsiella_sp	9045	0	1	1	0	1	1	0	0	1	0	2	2	3	4	0	0	1	3	0	1	0	0	2	4	1	1	4603	4382	6	9	4	6	3	2	1	0	0	0	0	0
Root	Bacteria	Firmicutes	Clostridia	Clostridiales	Lachnospiraceae	Dorea	Dorea_sp	8362	137	171	311	345	133	153	760	653	151	155	259	208	163	109	103	102	132	120	202	171	82	79	153	189	97	76	128	128	66	48	227	259	661	637	172	185	111	139	185	202
Root	Bacteria	Bacteroidetes	Bacteroidia	Bacteroidales	Bacteroidaceae	Bacteroides	Bacteroides ovatus	7631	329	333	115	150	509	498	103	112	246	233	393	436	114	95	2	4	87	83	105	100	384	393	62	46	405	397	276	241	39	26	113	146	223	204	56	45	68	74	184	202
Root	Bacteria	Bacteroidetes	Bacteroidia	Bacteroidales	Prevotellaceae	Paraprevotella	Paraprevotella_sp	7437	39	60	64	59	36	41	18	23	72	62	185	166	2005	1997	24	20	318	321	411	369	82	79	46	45	110	80	81	84	34	20	14	17	69	67	81	98	8	8	59	65
Root	Bacteria	Bacteroidetes	Bacteroidia	Bacteroidales	Bacteroidales_f	Bacteroidales_g	Bacteroidales_sp	6677	39	59	44	41	56	58	30	22	55	68	78	61	1022	915	15	17	487	498	704	598	36	32	53	76	34	37	59	51	67	61	169	135	117	119	159	182	61	75	154	133
Root	Bacteria	Firmicutes	Negativicutes	Acidaminococcales	Acidaminococcaceae	Phascolarctobacterium	Phascolarctobacterium_sp	6407	166	197	105	137	29	31	1754	1780	101	95	202	227	4	7	77	72	12	9	6	6	0	1	2	0	2	0	420	391	2	0	1	2	2	1	284	240	22	17	2	1
Root	Bacteria	Firmicutes	Clostridia	Clostridiales	Lachnospiraceae	Ruminococcus	Ruminococcus gnavus	5875	79	103	120	148	140	129	580	464	128	112	221	170	90	90	67	83	84	96	121	125	44	39	132	110	55	46	211	207	42	52	104	112	410	471	133	119	112	104	105	117
Root	Bacteria	Firmicutes	Erysipelotrichia	Erysipelotrichales	Erysipelotrichaceae	Erysipelotrichaceae_g	Erysipelotrichaceae_sp	5834	206	225	166	192	296	297	68	63	294	261	216	214	82	83	77	63	91	96	117	159	2	5	16	5	8	5	166	148	4	7	34	25	650	698	125	105	32	37	247	249
Root	Bacteria	Bacteroidetes	Bacteroidia	Bacteroidales	Prevotellaceae	Prevotella	Prevotella_sp	5626	93	115	181	177	43	43	34	33	9	11	43	34	80	81	11	10	61	40	64	82	10	15	2	4	13	12	10	18	6	12	5	9	940	894	87	81	15	6	1116	1126
Root	Bacteria	Bacteroidetes	Bacteroidia	Bacteroidales	Porphyromonadaceae	Porphyromonadaceae_g	Porphyromonadaceae_sp	5548	197	231	326	373	180	218	204	183	99	126	306	298	256	275	1	1	224	227	270	265	11	12	46	72	12	14	53	50	58	60	373	371	30	55	19	25	11	13	3	0
Root	Bacteria	Bacteroidetes	Bacteroidia	Bacteroidales	Prevotellaceae	Prevotella	Prevotella stercorea	5332	23	22	20	26	29	39	5	5	27	29	35	31	18	15	0	0	13	5	9	11	0	0	27	22	0	1	0	0	15	17	33	25	1063	1028	13	16	10	12	1365	1323
Root	Bacteria	Firmicutes	Clostridia	Clostridiales	Clostridiaceae	Clostridium	Clostridium_sp	4873	92	109	112	142	94	100	299	344	171	161	116	108	173	159	47	54	85	66	105	101	10	7	104	112	6	9	231	193	48	46	115	123	231	203	87	115	81	106	194	214
Root	Bacteria	Bacteroidetes	Bacteroidia	Bacteroidales	Odoribacteraceae	Odoribacter	Odoribacter_sp	4705	79	91	60	55	121	100	24	33	115	106	179	207	55	43	1	2	31	23	21	33	0	3	679	674	7	1	248	227	499	523	100	67	51	46	11	11	103	75	0	1
Root	Bacteria	Firmicutes	Clostridia	Clostridiales	Eubacteriaceae	Eubacterium	Eubacterium biforme	4533	42	65	217	250	20	33	7	5	2	1	0	1	414	360	4	3	205	189	244	222	0	0	1	0	0	1	4	4	0	0	348	336	488	527	10	24	5	4	231	266
Root	Bacteria	Firmicutes	Clostridia	Clostridiales	Clostridiaceae	SMB53	SMB53_sp	4240	110	144	95	79	130	145	195	221	50	52	123	104	133	132	74	65	56	48	74	64	95	88	57	61	90	73	182	174	21	22	189	142	191	159	142	188	13	10	124	125
Root	Bacteria	Proteobacteria	Alphaproteobacteria	RF32	RF32_f	RF32_g	RF32_sp	3969	136	145	357	432	104	149	17	16	500	465	413	373	37	23	1	1	0	0	0	0	0	0	225	202	0	3	0	0	140	116	3	5	16	7	9	6	30	36	0	2
Root	Bacteria	Firmicutes	Clostridia	Clostridiales	Clostridiaceae	Clostridiaceae_g	Clostridiaceae_sp	3588	62	82	39	53	79	84	322	279	44	52	61	50	83	60	43	41	40	37	35	45	49	50	154	148	57	58	131	120	93	84	110	82	215	208	86	85	37	37	93	100
Root	Bacteria	Firmicutes	Clostridia	Clostridiales	Lachnospiraceae	Anaerostipes	Anaerostipes_sp	3529	147	176	197	238	251	250	258	274	99	87	162	148	49	42	24	24	33	33	36	39	3	8	74	56	10	9	32	27	31	20	106	123	126	113	42	32	20	29	43	58
Root	Bacteria	Firmicutes	Bacilli	Lactobacillales	Streptococcaceae	Streptococcus	Streptococcus_sp	3478	91	99	23	36	29	22	27	18	25	11	25	23	39	32	97	93	97	71	121	114	7	10	25	33	7	6	247	260	2	3	159	140	392	397	139	147	50	62	140	159
Root	Bacteria	Bacteroidetes	Bacteroidia	Bacteroidales	S24-7	S24-7_g	S24-7_sp	3320	64	79	39	44	93	84	46	54	35	42	81	58	41	29	1	0	20	26	32	28	92	85	378	314	131	102	88	60	173	160	36	50	142	157	15	12	56	62	158	153
Root	Bacteria	Actinobacteria	Actinobacteria(class)	Bifidobacteriales	Bifidobacteriaceae	Bifidobacterium	Bifidobacterium_sp	3133	13	21	29	30	24	17	31	25	41	41	57	65	40	51	23	30	76	79	106	92	0	0	4	2	1	2	60	72	2	3	301	358	79	66	31	35	598	567	30	31
Root	Bacteria	Firmicutes	Clostridia	Clostridiales	Lachnospiraceae	Blautia	Blautia producta	2823	37	42	52	69	40	42	239	208	23	22	74	71	31	18	45	62	44	23	37	32	33	34	22	14	45	34	85	87	3	4	34	32	353	398	91	82	34	45	88	94
Root	Bacteria	Bacteroidetes	Bacteroidia	Bacteroidales	Porphyromonadaceae	Dysgonomonas	Dysgonomonas_sp	2757	50	40	22	11	55	61	77	76	49	46	75	63	35	49	2	3	19	17	22	27	353	316	40	25	372	345	136	130	6	7	18	26	31	29	13	9	19	10	39	34
Root	Bacteria	Firmicutes	Clostridia	Clostridiales	Lachnospiraceae	Roseburia	Roseburia faecis	2645	34	42	145	144	26	18	81	75	155	147	186	180	20	20	3	8	7	15	17	19	7	6	1	0	7	4	424	402	0	1	38	33	45	82	15	16	72	71	39	40
Root	Bacteria	Firmicutes	Negativicutes	Veillonellales	Veillonellaceae	Megasphaera	Megasphaera_sp	2626	1	0	2	2	3	2	11	8	59	64	161	136	17	10	18	23	10	6	6	15	2	5	1	2	2	1	10	14	2	0	9	6	23	23	68	71	888	878	26	41
Root	Bacteria	Actinobacteria	Actinobacteria(class)	Bifidobacteriales	Bifidobacteriaceae	Bifidobacterium	Bifidobacterium adolescentis	2542	18	17	34	50	17	30	0	1	117	105	139	102	45	26	8	8	80	73	114	101	0	0	1	0	0	0	9	9	3	1	504	538	92	64	23	21	93	68	14	17
Root	Bacteria	Bacteroidetes	Bacteroidia	Bacteroidales	Odoribacteraceae	Butyricimonas	Butyricimonas_sp	2462	11	18	30	49	17	15	26	35	184	171	492	479	58	45	9	3	51	47	77	68	3	4	71	80	4	4	67	52	45	53	48	56	16	24	3	6	15	14	2	10
Root	Bacteria	Firmicutes	Clostridia	Clostridiales	Christensenellaceae	Christensenellaceae_g	Christensenellaceae_sp	2450	34	38	67	81	12	17	11	7	50	30	114	95	144	132	18	29	24	25	26	12	0	4	313	275	6	3	1	0	142	173	26	13	85	86	46	73	35	30	88	85
Root	Bacteria	Bacteroidetes	Bacteroidia	Bacteroidales	Prevotellaceae	Prevotella	Prevotella melaninogenica	2328	3	5	2	3	4	3	6	3	45	34	34	26	143	136	18	23	129	127	162	147	10	16	6	2	9	11	17	12	3	3	3	1	180	218	131	137	5	6	242	263
Root	Bacteria	Firmicutes	Clostridia	Clostridiales	Lachnospiraceae	Coprococcus	Coprococcus eutactus	2306	6	19	1	4	1	2	8	14	27	37	106	104	764	732	40	38	41	37	39	42	0	0	2	6	0	1	27	27	2	2	2	0	4	5	75	77	4	3	3	4
Root	Bacteria	Actinobacteria	Coriobacteriia	Coriobacteriales	Coriobacteriaceae	Collinsella	Collinsella aerofaciens	2302	11	16	64	82	19	12	367	363	31	37	85	66	58	37	43	42	76	68	90	90	10	14	6	5	13	20	1	2	2	3	161	140	49	40	61	39	2	3	37	37
Root	Bacteria	Proteobacteria	Gammaproteobacteria	Enterobacteriales	Enterobacteriaceae	Citrobacter	Citrobacter_sp	2049	0	0	0	0	0	0	1	0	0	0	0	0	0	0	0	0	1	0	2	0	0	0	10	5	1	0	1017	991	3	4	3	1	4	2	0	0	1	0	1	2
Root	Bacteria	Firmicutes	Clostridia	Clostridiales	Lachnospiraceae	Lachnospira	Lachnospira pectinoschiza	2004	82	95	36	29	154	150	129	90	25	21	73	86	77	83	27	26	34	31	27	32	7	6	2	2	5	5	61	62	3	2	0	4	112	119	38	63	20	20	93	73
Root	Bacteria	Actinobacteria	Actinobacteria(class)	Bifidobacteriales	Bifidobacteriaceae	Bifidobacterium	Bifidobacterium longum	1968	28	26	46	38	22	29	63	70	41	23	41	26	15	13	6	8	21	13	28	24	0	0	7	2	0	0	77	64	2	0	237	259	97	108	15	15	212	215	35	42
Root	Bacteria	Proteobacteria	Gammaproteobacteria	Enterobacteriales	Enterobacteriaceae	Klebsiella	Klebsiella oxytoca	1903	0	0	1	0	2	0	0	0	1	0	1	0	0	0	1	0	0	0	0	0	0	0	0	1	0	0	988	895	3	3	1	3	0	1	0	1	0	0	1	0
Root	Bacteria	Proteobacteria	Gammaproteobacteria	Enterobacteriales	Enterobacteriaceae	Hafnia	Hafnia alvei	1853	0	0	0	0	0	0	0	0	1	0	2	0	0	0	0	0	1	0	0	0	0	0	22	8	0	1	858	937	5	6	4	2	1	1	0	0	1	2	0	1
Root	Bacteria	Proteobacteria	Gammaproteobacteria	Enterobacteriales	Enterobacteriaceae	Serratia	Serratia_sp	1711	0	0	0	1	0	1	0	0	0	0	0	0	0	0	0	0	0	0	0	0	0	0	8	8	0	0	827	850	6	4	3	0	3	0	0	0	0	0	0	0
Root	Bacteria	Proteobacteria	Gammaproteobacteria	Aeromonadales	Aeromonadaceae	Aeromonadaceae_g	Aeromonadaceae_sp	1590	0	0	1	0	0	0	0	0	0	1	0	0	0	0	1	0	1	0	0	0	0	1	0	2	0	2	782	794	1	2	0	2	0	0	0	0	0	0	0	0
Root	Bacteria	Bacteroidetes	Bacteroidia	Bacteroidales	Bacteroidaceae	Bacteroides	Bacteroides eggerthii	1568	79	96	19	25	154	138	290	283	14	8	34	36	36	25	1	0	25	23	34	43	1	1	9	10	1	1	36	37	4	3	19	21	28	25	2	5	0	1	1	0
Root	Bacteria	Proteobacteria	Deltaproteobacteria	Desulfovibrionales	Desulfovibrionaceae	Bilophila	Bilophila_sp	1561	71	80	66	72	122	115	204	174	22	19	96	114	7	5	0	0	8	5	11	7	0	0	77	59	0	2	0	0	50	50	49	32	10	3	8	14	5	4	0	0
Root	Bacteria	Bacteroidetes	Bacteroidia	Bacteroidales	Bacteroidaceae	Bacteroides	Bacteroides caccae	1538	17	20	32	31	16	22	13	22	68	75	126	129	82	67	2	0	71	68	69	63	29	11	83	62	28	21	14	8	58	43	54	53	17	22	5	10	7	4	11	5
Root	Bacteria	Bacteroidetes	Bacteroidia	Bacteroidales	Bacteroidaceae	Bacteroides	Bacteroides coprophilus	1516	98	83	280	356	51	43	7	5	0	0	0	5	0	0	45	59	8	5	7	5	0	0	0	0	1	5	0	1	0	0	0	0	1	0	228	210	4	9	0	0
Root	Bacteria	Cyanobacteria	4C0d-2	YS2	YS2_f	YS2_g	YS2_sp	1507	100	108	229	273	68	69	11	10	0	0	0	0	0	0	1	0	0	1	0	0	0	0	158	160	0	2	0	0	129	106	3	4	7	18	1	1	16	31	0	1
Root	Bacteria	Firmicutes	Clostridia	Clostridiales	Peptostreptococcaceae	Peptostreptococcaceae_g	Peptostreptococcaceae_sp	1504	28	30	30	24	38	31	47	48	13	10	11	8	0	1	23	28	6	5	11	14	57	41	38	39	51	41	143	115	10	10	85	73	70	84	74	67	10	11	38	41
Root	Bacteria	Verrucomicrobia	Verrucomicrobiae	Verrucomicrobiales	Verrucomicrobiaceae	Akkermansia	Akkermansia muciniphila	1485	24	23	42	64	9	10	6	2	9	8	35	19	0	2	7	0	4	7	6	7	0	0	469	381	0	3	0	2	110	113	6	2	12	13	13	12	29	36	0	0
Root	Bacteria	Firmicutes	Erysipelotrichia	Erysipelotrichales	Erysipelotrichaceae	Catenibacterium	Catenibacterium_sp	1449	0	0	1	2	0	0	0	0	1	0	0	1	0	0	0	0	0	0	0	0	0	0	0	0	0	0	1	1	4	1	218	242	227	209	4	5	2	2	242	286
Root	Bacteria	Firmicutes	Negativicutes	Veillonellales	Veillonellaceae	Veillonellaceae_g	Veillonellaceae_sp	1429	40	59	84	86	17	17	108	121	19	31	67	62	14	7	18	11	13	7	6	16	34	36	12	8	40	45	42	45	3	1	5	9	49	40	37	29	45	45	45	56
Root	Bacteria	Proteobacteria	Gammaproteobacteria	Enterobacteriales	Enterobacteriaceae	Erwinia	Erwinia_sp	1400	1	0	0	0	1	0	0	0	1	0	0	1	1	0	1	0	1	1	0	0	0	1	0	5	1	0	728	645	0	1	2	3	2	0	1	0	0	2	0	1
Root	Bacteria	Bacteroidetes	Bacteroidia	Bacteroidales	Porphyromonadaceae	Porphyromonadaceae_g	Porphyromonadaceae_sp	1390	27	18	8	6	47	45	21	17	19	18	17	25	10	8	0	0	6	4	5	5	18	16	78	85	17	22	33	29	50	64	16	16	13	8	3	5	277	315	12	7
Root	Bacteria	Firmicutes	Clostridia	Clostridiales	Lachnospiraceae	Dorea	Dorea formicigenerans	1381	26	28	34	43	34	39	115	85	25	35	55	49	28	18	21	28	29	45	43	55	2	2	8	2	4	1	6	3	0	1	53	36	114	138	22	23	13	16	56	46
Root	Bacteria	Firmicutes	Clostridia	Clostridiales	Lachnospiraceae	Ruminococcus	Ruminococcus_sp	1374	26	16	30	31	25	21	206	171	35	31	40	49	21	11	17	22	24	24	28	29	5	8	20	24	3	11	51	55	7	3	21	20	56	68	29	29	28	26	24	29
Root	Bacteria	Firmicutes	Negativicutes	Veillonellales	Veillonellaceae	Veillonella	Veillonella_sp	1358	2	3	2	2	2	1	8	5	5	3	8	4	4	7	0	2	1	1	6	4	238	257	22	9	289	290	65	74	2	0	4	6	0	1	6	2	7	11	2	3
Root	Bacteria	Bacteroidetes	Bacteroidia	Bacteroidales	Bacteroidaceae	5-7N15	5-7N15_sp	1242	52	68	31	40	93	87	54	55	31	28	109	108	24	27	1	2	20	12	34	20	30	21	10	6	26	31	59	50	8	2	7	10	12	19	12	15	5	2	11	10
Root	Bacteria	Actinobacteria	Coriobacteriia	Coriobacteriales	Coriobacteriaceae	Coriobacteriaceae_g	Coriobacteriaceae_sp	1190	14	7	26	39	12	11	83	94	38	46	52	57	41	32	14	9	43	52	90	83	3	2	29	13	4	2	16	9	3	3	72	70	22	29	18	19	6	1	14	12
Root	Bacteria	Bacteroidetes	Bacteroidia	Bacteroidales	Bacteroidaceae	Bacteroides	Bacteroides fragilis	1163	76	86	11	12	113	103	151	138	3	2	9	5	3	6	1	0	0	2	1	5	14	19	18	20	17	19	21	17	13	13	52	59	26	24	15	17	30	41	0	1
Root	Bacteria	Tenericutes	Mollicutes	RF39	RF39_f	RF39_g	RF39_sp	1081	33	23	0	1	13	7	0	0	3	3	0	4	156	162	1	4	2	3	1	0	2	0	173	202	2	0	0	0	87	115	5	2	6	16	8	14	18	14	1	0
Root	Bacteria	Firmicutes	Negativicutes	Selenomonadales	Selenomonadaceae	Pectinatus	Pectinatus_sp	971	0	0	0	0	0	0	1	1	26	18	98	88	2	1	54	31	8	6	5	5	0	0	0	0	0	0	2	1	0	3	0	1	106	101	50	59	8	5	125	166
Root	Bacteria	Firmicutes	Clostridia	Clostridiales	Ruminococcaceae	Ruminococcus	Ruminococcus flavefaciens	921	17	32	89	95	17	10	19	6	30	22	51	56	43	47	9	7	24	23	30	35	0	0	13	29	0	0	33	34	20	5	12	13	14	16	19	26	0	8	10	7
Root	Bacteria	Firmicutes	Clostridia	Clostridiales	Eubacteriaceae	Eubacterium	Eubacterium dolichum	914	4	6	4	6	12	8	17	20	2	3	3	0	12	10	0	3	5	6	5	11	0	0	3	1	1	2	330	347	0	0	13	15	16	21	1	1	7	10	5	4
Root	Bacteria	Firmicutes	Erysipelotrichia	Erysipelotrichales	Erysipelotrichaceae	Turicibacter	Turicibacter_sp	887	18	11	0	4	16	27	0	0	5	2	6	1	0	0	136	133	9	5	14	12	1	2	32	20	1	0	1	1	12	13	41	55	5	16	131	134	7	6	7	3
Root	Bacteria	Firmicutes	Clostridia	Clostridiales	Ruminococcaceae	Anaerofilum	Anaerofilum_sp	887	41	45	44	60	16	17	31	41	26	31	52	46	12	15	37	28	15	20	23	20	0	0	17	16	0	0	15	7	3	5	43	33	6	7	54	49	3	2	4	3
Root	Bacteria	Firmicutes	Clostridia	Clostridiales	Lachnospiraceae	Shuttleworthia	Shuttleworthia_sp	859	9	11	7	8	17	21	30	37	12	13	28	23	6	12	4	7	8	4	5	5	1	2	4	2	3	2	199	170	3	4	4	7	48	63	14	13	23	17	10	3
Root	Bacteria	Proteobacteria	Gammaproteobacteria	Enterobacteriales	Enterobacteriaceae	Serratia	Serratia marcescens	852	0	0	0	0	0	0	0	0	1	0	0	0	0	0	0	0	1	0	0	0	0	0	0	0	0	1	454	394	1	0	0	0	0	0	0	0	0	0	0	0
Root	Bacteria	Proteobacteria	Deltaproteobacteria	Desulfovibrionales	Desulfovibrionaceae	Desulfovibrio	Desulfovibrio_sp	812	0	0	3	2	7	4	8	4	50	52	137	138	4	2	0	0	0	0	1	0	1	0	95	121	3	0	2	0	65	67	3	3	5	11	1	0	7	16	0	0
Root	Archaea	Euryarchaeota	Methanobacteria	Methanobacteriales	Methanobacteriaceae	Methanobrevibacter	Methanobrevibacter_sp	811	0	0	0	1	0	0	0	0	7	5	2	1	1	2	1	0	2	2	0	1	0	0	119	101	0	0	0	0	223	265	14	12	11	12	2	1	14	6	2	4
Root	Bacteria	Firmicutes	Clostridia	Clostridiales	Lachnospiraceae	Blautia	Blautia obeum	793	29	25	13	14	42	42	33	27	27	25	89	90	18	5	12	24	19	13	17	34	1	3	6	1	2	1	1	0	0	1	10	18	28	30	26	28	3	3	20	13
Root	Bacteria	Firmicutes	Clostridia	Clostridiales	Lachnospiraceae	Butyrivibrio	Butyrivibrio_sp	790	24	27	20	24	33	31	71	69	15	17	24	25	23	26	15	8	13	9	14	13	11	15	5	9	18	10	24	11	5	3	14	13	42	24	19	19	13	15	8	11
Root	Bacteria	Actinobacteria	Coriobacteriia	Coriobacteriales	Coriobacteriaceae	Collinsella	Collinsella_sp	760	3	2	21	29	3	2	105	127	14	12	24	21	19	13	16	9	33	25	29	23	4	6	4	5	2	5	15	12	0	0	45	40	18	12	19	9	4	4	18	8
Root	Bacteria	Bacteroidetes	Bacteroidia	Bacteroidales	Bacteroidaceae	Bacteroides	Bacteroides acidifaciens	751	41	41	12	12	48	44	35	21	2	2	9	14	1	1	0	0	1	3	5	5	34	22	4	7	36	34	110	103	7	4	9	9	3	3	5	7	26	30	1	0
Root	Bacteria	Firmicutes	Clostridia	Clostridiales	Lachnospiraceae	Shuttleworthia	Shuttleworthia satelles	726	5	8	17	17	7	7	85	77	11	7	21	21	45	34	25	19	6	9	9	4	0	6	2	0	1	3	18	24	0	3	11	9	47	55	35	28	15	17	10	8
Root	Bacteria	Proteobacteria	Gammaproteobacteria	Pseudomonadales	Pseudomonadaceae	Pseudomonas	Pseudomonas_sp	719	0	0	0	2	0	0	1	0	0	0	1	0	0	0	0	0	0	0	0	0	0	0	0	1	0	2	357	353	0	0	0	2	0	0	0	0	0	0	0	0
Root	Bacteria	Proteobacteria	Gammaproteobacteria	Enterobacteriales	Enterobacteriaceae	CandidatusHamiltonella	CandidatusHamiltonella_sp	718	0	0	0	0	0	0	0	0	0	0	0	0	0	0	0	0	0	3	0	0	0	0	2	1	0	0	361	347	1	1	0	0	0	0	1	0	0	1	0	0
Root	Bacteria	Firmicutes	Clostridia	Clostridiales	Clostridiales_Incertae Sedis XIII	Clostridiales_Incertae Sedis XIII_g	Clostridiales_Incertae Sedis XIII_sp	683	16	12	16	21	13	12	13	19	10	16	34	27	35	26	14	30	9	18	15	10	3	4	27	15	1	3	6	3	14	12	57	58	13	15	51	26	0	2	5	2
Root	Bacteria	Bacteroidetes	Bacteroidia	Bacteroidales	Bacteroidaceae	Bacteroides	Bacteroides plebeius	671	43	52	10	7	77	88	19	13	13	9	19	21	20	17	3	1	5	7	14	9	15	11	1	3	19	25	37	30	3	1	4	5	6	3	15	27	4	2	7	6
Root	Bacteria	Firmicutes	Clostridia	Clostridiales	Lachnospiraceae	Lachnobacterium	Lachnobacterium_sp	667	14	10	3	2	5	6	6	8	26	32	40	49	15	13	12	8	20	17	23	25	0	0	2	1	2	0	113	111	0	1	1	5	4	6	21	14	18	25	8	1
Root	Bacteria	Firmicutes	Erysipelotrichia	Erysipelotrichales	Erysipelotrichaceae	Coprobacillus	Coprobacillus_sp	599	32	23	8	18	36	24	12	22	16	10	22	14	2	2	5	8	9	4	12	14	1	0	5	11	0	0	17	7	3	6	4	4	63	69	11	8	21	19	31	26
Root	Bacteria	Proteobacteria	Betaproteobacteria	Burkholderiales	Comamonadaceae	Comamonadaceae_g	Comamonadaceae_sp	597	8	3	2	3	8	9	24	20	20	12	24	31	7	4	3	0	8	1	8	6	58	59	3	4	75	63	14	14	1	0	8	14	12	8	4	2	30	16	4	7
Root	Bacteria	Firmicutes	Clostridia	Clostridiales	Eubacteriaceae	Eubacterium	Eubacterium cylindroides	540	6	3	13	17	1	3	0	1	0	0	0	0	66	46	0	0	24	20	36	24	0	0	0	0	0	0	0	0	1	0	49	35	64	66	5	5	0	0	26	29
Root	Bacteria	Proteobacteria	Gammaproteobacteria	Enterobacteriales	Enterobacteriaceae	CandidatusPhlomobacter	CandidatusPhlomobacter_sp	502	0	0	0	0	0	0	0	0	0	0	0	0	0	0	1	0	0	0	1	0	0	0	2	2	0	0	240	249	1	1	1	1	0	1	0	0	1	0	1	0
Root	Bacteria	Proteobacteria	Gammaproteobacteria	Pasteurellales	Pasteurellaceae	Haemophilus	Haemophilus parainfluenzae	501	7	8	4	1	6	4	11	8	8	2	4	9	6	1	10	10	4	2	3	4	29	18	9	6	31	37	12	16	1	5	83	77	13	5	10	16	7	6	4	4
Root	Bacteria	Bacteroidetes	Bacteroidia	Bacteroidales	Prevotellaceae	Prevotella	Prevotella nanceiensis	487	0	1	1	0	0	2	1	0	6	3	2	2	16	27	1	3	35	30	41	38	2	5	0	0	2	3	2	1	2	0	0	0	60	47	9	10	0	0	72	63
Root	Bacteria	Actinobacteria	Actinobacteria(class)	Bifidobacteriales	Bifidobacteriaceae	Bifidobacteriaceae_g	Bifidobacteriaceae_sp	481	4	5	4	6	10	4	9	11	9	11	10	12	3	5	2	7	10	12	18	9	0	0	1	0	0	0	9	15	0	0	56	55	21	13	7	1	68	63	4	7
Root	Bacteria	Proteobacteria	Gammaproteobacteria	Pasteurellales	Pasteurellaceae	Haemophilus	Haemophilus_sp	471	1	2	2	1	2	0	5	1	0	0	0	0	0	1	0	1	1	0	1	1	6	3	1	4	6	6	194	191	0	1	12	16	3	1	3	2	1	0	0	2
Root	Bacteria	Bacteroidetes	Bacteroidia	Bacteroidales	Porphyromonadaceae	Tannerella	Tannerella_sp	444	9	15	6	9	25	34	15	14	13	10	15	38	6	8	0	0	4	5	9	14	22	20	5	9	19	24	23	24	17	12	5	5	0	3	2	1	2	2	0	0
Root	Bacteria	Bacteroidetes	Bacteroidia	Bacteroidales	Rikenellaceae	Blvii28	Blvii28_sp	443	2	3	3	1	3	1	14	9	5	6	7	13	7	8	0	0	5	3	3	3	57	59	3	5	62	71	26	37	1	2	5	3	4	4	2	1	0	0	4	1
Root	Bacteria	Proteobacteria	Gammaproteobacteria	Enterobacteriales	Enterobacteriaceae	Plesiomonas	Plesiomonas shigelloides	415	0	0	0	0	0	0	0	0	0	0	0	0	0	0	1	0	0	0	0	0	0	0	1	0	0	1	193	216	0	1	1	1	0	0	0	0	0	0	0	0
Root	Bacteria	Firmicutes	Negativicutes	Veillonellales	Veillonellaceae	Veillonella	Veillonella dispar	414	7	8	4	9	5	2	24	16	11	5	10	6	6	7	3	4	2	2	3	2	28	18	2	2	26	16	69	59	0	0	14	17	4	3	8	7	1	3	0	1
Root	Bacteria	Proteobacteria	Gammaproteobacteria	Enterobacteriales	Enterobacteriaceae	Serratia	Serratia symbiotica	402	0	0	0	0	0	0	0	0	0	1	1	0	0	0	0	0	0	0	0	0	0	0	0	0	0	0	215	184	0	0	0	1	0	0	0	0	0	0	0	0
Root	Bacteria	Firmicutes	Clostridia	Clostridiales	Clostridiales_Incertae Sedis XIII	Mogibacterium	Mogibacterium_sp	392	0	0	0	1	0	0	0	0	0	0	1	1	2	0	1	1	1	1	1	1	0	0	3	1	0	1	91	92	0	0	85	72	8	18	1	3	1	1	2	2
Root	Bacteria	Firmicutes	Clostridia	Clostridiales	Ruminococcaceae	Clostridium	Clostridium methylpentosum	391	0	1	3	2	2	3	1	1	67	73	70	57	2	4	1	0	5	1	1	3	0	0	32	26	0	0	1	1	11	14	3	0	0	2	0	0	2	2	0	0
Root	Bacteria	Bacteroidetes	Bacteroidia	Bacteroidales	Porphyromonadaceae	Parabacteroides	Parabacteroides gordonii	377	0	1	5	6	0	0	0	0	0	0	0	1	0	0	0	0	0	0	0	0	2	4	40	40	5	1	0	0	42	50	0	1	3	1	1	1	85	88	0	0
Root	Bacteria	Firmicutes	Clostridia	Clostridiales	Ruminococcaceae	Ruminococcus	Ruminococcus bromii	374	13	19	8	11	3	5	2	0	2	0	0	0	0	0	10	12	1	5	1	5	0	0	0	0	0	0	0	0	0	0	103	121	7	12	17	11	1	0	4	1
Root	Bacteria	Proteobacteria	Gammaproteobacteria	Enterobacteriales	Enterobacteriaceae	Erwinia	Erwinia dispersa	374	0	0	0	0	0	1	0	0	0	0	0	0	0	0	0	0	0	1	0	0	0	0	2	1	0	0	179	186	1	2	0	1	0	0	0	0	0	0	0	0
Root	Bacteria	Firmicutes	Negativicutes	Acidaminococcales	Acidaminococcaceae	Succiniclasticum	Succiniclasticum_sp	368	4	9	5	5	3	0	107	71	4	2	10	13	0	0	16	17	1	1	1	0	0	1	1	2	0	0	15	8	0	0	0	0	5	4	29	28	2	1	1	2
Root	Bacteria	Bacteroidetes	Bacteroidia	Bacteroidales	Porphyromonadaceae	Paludibacter	Paludibacter_sp	353	3	6	0	1	7	2	3	3	2	1	3	2	2	1	0	0	4	2	6	1	3	2	34	27	1	2	2	5	19	19	2	5	1	1	3	0	92	84	0	2
Root	Bacteria	Firmicutes	Bacilli	Lactobacillales	Lactobacillaceae	Lactobacillus	Lactobacillus mucosae	352	0	0	0	0	0	0	0	0	0	0	0	0	0	0	0	0	0	0	0	0	0	0	0	0	0	0	0	0	0	0	136	149	25	20	1	1	3	0	6	11
Root	Bacteria	Proteobacteria	Betaproteobacteria	Burkholderiales	Oxalobacteraceae	Oxalobacteraceae_g	Oxalobacteraceae_sp	335	4	4	2	4	9	9	12	22	9	9	19	8	3	3	0	0	6	2	5	1	42	31	1	1	36	27	9	5	0	0	7	9	1	2	2	3	10	15	1	2
Root	Bacteria	Firmicutes	Bacilli	Bacillales	Bacillaceae	Bacillaceae_g	Bacillaceae_sp	310	3	3	1	2	5	7	0	0	2	2	1	0	0	0	46	40	3	2	6	5	1	0	8	5	2	0	3	4	2	2	18	19	0	4	52	57	1	4	0	0
Root	Bacteria	Bacteroidetes	Bacteroidia	Bacteroidales	Prevotellaceae	CF231	CF231_sp	305	6	6	7	10	6	8	5	7	6	7	21	22	12	7	0	0	2	9	7	2	5	2	4	5	9	7	25	19	6	7	1	3	12	18	1	1	2	6	14	8
Root	Bacteria	Firmicutes	Negativicutes	Veillonellales	Veillonellaceae	Veillonella	Veillonella parvula	305	3	3	4	3	2	1	16	13	2	3	5	4	3	8	4	3	0	2	3	4	20	13	2	0	28	28	39	42	0	0	8	10	0	0	5	7	7	8	1	1
Root	Bacteria	Bacteroidetes	Bacteroidia	Bacteroidales	Rikenellaceae	Rikenellaceae_g	Rikenellaceae_sp	294	4	14	0	2	5	12	16	6	4	5	11	4	3	1	0	0	4	1	6	5	24	22	7	8	39	22	20	12	5	7	6	3	1	6	3	0	1	2	1	2
Root	Bacteria	Firmicutes	Erysipelotrichia	Erysipelotrichales	Erysipelotrichaceae	cc_115	cc_115_sp	292	9	3	2	3	14	19	0	0	3	0	10	9	0	1	0	1	0	3	0	1	0	0	16	14	0	0	97	60	2	4	2	13	3	0	0	0	0	2	0	1
Root	Bacteria	Actinobacteria	Coriobacteriia	Coriobacteriales	Coriobacteriaceae	Slackia	Slackia_sp	279	0	1	2	2	1	2	8	12	6	2	8	7	0	0	5	9	6	0	4	4	0	0	0	1	0	1	2	3	0	0	58	61	9	16	20	13	0	0	6	10
Root	Bacteria	Bacteroidetes	Bacteroidia	Bacteroidales	Prevotellaceae	Prevotellaceae_g	Prevotellaceae_sp	269	1	6	7	8	2	3	0	0	4	1	6	9	18	23	1	1	15	21	22	12	3	3	1	2	0	1	0	1	1	2	5	2	7	12	25	21	1	1	11	10
Root	Bacteria	Firmicutes	Negativicutes	Veillonellales	Veillonellaceae	vadinHB04	vadinHB04_sp	253	6	3	2	1	1	1	51	55	2	7	17	8	0	1	3	0	0	0	0	0	1	0	0	0	0	0	42	35	1	0	0	0	0	0	8	8	0	0	0	0
Root	Bacteria	Firmicutes	Clostridia	Clostridiales	Lachnospiraceae	Ruminococcus	Ruminococcus torques	249	10	13	10	8	12	5	25	16	6	2	22	10	4	0	2	1	3	3	5	2	1	3	6	7	3	2	2	0	6	7	11	4	11	10	2	2	1	3	4	5
Root	Bacteria	Firmicutes	Clostridia	Clostridiales	Peptostreptococcaceae	Clostridium	Clostridium difficile	247	0	1	4	5	0	1	2	5	0	2	3	4	1	0	2	4	3	0	2	3	0	2	4	1	5	0	77	82	0	0	3	7	1	6	1	5	1	0	4	6
Root	Bacteria	Actinobacteria	Actinobacteria(class)	Bifidobacteriales	Bifidobacteriaceae	Bifidobacterium	Bifidobacterium bifidum	241	0	1	0	1	1	0	0	0	5	7	7	7	9	10	0	0	13	19	29	39	0	0	2	1	0	0	0	0	1	0	32	27	6	5	0	0	6	7	5	1
Root	Bacteria	Firmicutes	Clostridia	Halanaerobiales	Halanaerobiaceae	Halanaerobiaceae_g	Halanaerobiaceae_sp	238	5	4	6	9	2	0	16	10	1	0	0	3	0	0	4	3	1	2	5	1	11	6	4	7	5	9	12	8	1	2	11	13	12	11	15	9	1	2	18	9
Root	Bacteria	Proteobacteria	Betaproteobacteria	Burkholderiales	Alcaligenaceae	Alcaligenaceae_g	Alcaligenaceae_sp	237	7	8	7	8	7	5	7	8	6	7	13	9	0	2	0	0	1	1	4	1	17	14	2	2	22	22	3	3	0	0	5	1	5	4	1	7	14	11	2	1
Root	Bacteria	Proteobacteria	Gammaproteobacteria	Enterobacteriales	Enterobacteriaceae	Trabulsiella	Trabulsiella_sp	223	0	0	0	0	0	0	0	0	0	0	0	0	0	0	0	0	0	0	0	0	0	0	0	0	0	0	112	109	0	1	0	0	1	0	0	0	0	0	0	0
Root	Bacteria	Actinobacteria	Actinobacteria(class)	Actinomycetales	Actinomycetaceae	Actinomyces	Actinomyces_sp	220	3	4	8	3	1	1	10	13	1	2	5	4	1	1	3	8	0	3	2	2	0	3	4	2	0	1	36	37	0	0	14	14	4	3	5	5	5	1	3	8
Root	Bacteria	Bacteroidetes	Bacteroidia	Bacteroidales	Rikenellaceae	Rikenella	Rikenella_sp	207	0	0	0	0	2	0	0	0	0	2	1	1	0	1	0	0	0	0	0	0	0	1	49	52	0	0	0	0	33	43	1	1	1	6	0	0	9	4	0	0
Root	Bacteria	Firmicutes	Bacilli	Lactobacillales	Enterococcaceae	Enterococcus	Enterococcus_sp	206	4	4	1	1	0	1	4	1	1	2	0	0	1	0	4	5	1	3	4	3	0	0	0	0	0	0	44	53	0	0	10	8	10	9	9	2	3	2	8	8
Root	Bacteria	Firmicutes	Negativicutes	Selenomonadales	Sporomusaceae	Sporomusa	Sporomusa_sp	205	8	8	4	5	1	1	38	49	7	5	7	5	2	0	2	3	0	1	0	1	0	0	1	0	0	0	14	12	1	0	1	0	0	0	16	7	1	4	0	1
Root	Bacteria	Firmicutes	Erysipelotrichia	Erysipelotrichales	Erysipelotrichaceae	Coprobacillus	Coprobacillus cateniformis	205	7	10	11	14	10	14	0	2	5	5	2	6	1	0	1	3	2	2	7	3	0	0	0	0	0	0	3	1	0	1	0	0	29	30	4	4	3	3	13	9
Root	Bacteria	Firmicutes	Bacilli	Bacillales	Bacillales_f	Bacillales_g	Bacillales_sp	202	4	3	0	1	6	6	0	0	2	0	0	2	0	0	33	23	2	2	2	2	0	0	4	6	0	0	1	0	2	0	11	13	2	0	32	36	1	3	2	1
Root	Bacteria	Bacteroidetes	Bacteroidia	Bacteroidales	Porphyromonadaceae	Porphyromonas	Porphyromonas_sp	201	3	3	2	4	7	4	3	6	5	1	4	9	2	2	0	0	1	2	6	0	12	6	3	5	6	4	5	6	3	2	0	3	3	1	0	1	30	39	3	5
Root	Bacteria	Proteobacteria	Gammaproteobacteria	Enterobacteriales	Enterobacteriaceae	Baumannia	Baumannia cicadellinicola	201	0	0	0	0	0	0	0	0	0	0	0	0	0	0	0	0	0	0	0	0	0	0	0	1	0	0	97	102	0	1	0	0	0	0	0	0	0	0	0	0
Root	Bacteria	Actinobacteria	Coriobacteriia	Coriobacteriales	Coriobacteriaceae	Adlercreutzia	Adlercreutzia_sp	196	5	7	5	6	6	9	10	10	14	6	5	5	6	2	0	3	2	4	14	8	0	0	4	3	0	0	10	16	0	1	14	9	0	0	6	3	0	2	1	0
Root	Bacteria	Firmicutes	Bacilli	Lactobacillales	Lactobacillaceae	Lactobacillus	Lactobacillus_sp	190	4	2	1	1	3	7	1	3	0	1	1	0	0	0	0	0	2	3	3	0	1	1	3	1	0	2	11	11	0	0	50	47	5	9	2	2	1	2	5	5
Root	Bacteria	Bacteroidetes	Bacteroidia	Bacteroidales	Porphyromonadaceae	CandidatusAzobacteroides	CandidatusAzobacteroides_sp	177	5	7	2	2	10	12	12	12	2	4	7	2	2	3	0	0	0	0	0	1	2	2	8	4	0	5	5	8	3	2	2	3	1	2	1	0	21	22	1	2
Root	Bacteria	Bacteroidetes	Bacteroidia	Bacteroidales	Prevotellaceae	Prevotellaceae_g	Prevotellaceae_sp	175	2	4	1	2	10	10	0	0	6	5	3	5	5	9	1	0	7	6	6	3	0	0	0	1	0	0	0	0	0	0	26	44	7	2	2	6	0	0	2	0
Root	Bacteria	Firmicutes	Clostridia	Natranaerobiales	Anaerobrancaceae	Anaerobrancaceae_g	Anaerobrancaceae_sp	169	3	1	7	8	1	1	5	9	3	3	1	2	0	0	1	3	1	1	2	1	12	14	6	3	6	9	1	0	1	3	14	10	8	3	9	8	0	1	5	3
Root	Bacteria	Lentisphaerae	Lentisphaeria	Victivallales	Victivallaceae	Victivallaceae_g	Victivallaceae_sp	153	13	14	19	26	8	2	1	0	5	6	5	7	0	1	0	0	0	0	0	2	0	0	14	15	0	0	0	0	5	9	0	0	0	0	0	1	0	0	0	0
Root	Bacteria	Proteobacteria	Gammaproteobacteria	Enterobacteriales	Enterobacteriaceae	Enterobacter	Enterobacter cloacae	148	0	0	0	0	0	0	0	0	0	0	0	0	0	0	0	0	1	0	0	0	0	0	1	2	0	0	74	68	1	0	0	0	0	0	0	0	1	0	0	0
Root	Bacteria	Firmicutes	Negativicutes	Selenomonadales	Selenomonadaceae	Megamonas	Megamonas hypermegale	145	0	0	0	0	0	0	0	0	2	4	16	18	0	0	1	1	0	0	0	0	0	0	0	0	0	0	0	0	0	0	0	0	17	25	1	3	0	0	29	28
Root	Bacteria	Bacteroidetes	Bacteroidia	Bacteroidales	Bacteroidaceae	Bacteroidaceae_g	Bacteroidaceae_sp	143	2	1	0	0	1	2	2	3	3	1	2	4	1	2	0	0	2	1	3	2	0	1	15	8	1	0	6	2	8	6	2	0	0	1	0	2	24	35	0	0
Root	Bacteria	Bacteroidetes	Bacteroidia	Bacteroidales	Rikenellaceae	Alistipes	Alistipes indistinctus	135	0	1	0	1	0	1	0	1	0	1	0	0	26	28	0	0	22	11	26	11	0	0	0	0	0	0	0	0	2	1	0	0	0	0	1	2	0	0	0	0
Root	Bacteria	Firmicutes	Clostridia	Clostridiales	Clostridiales_Incertae Sedis XII	Fusibacter	Fusibacter_sp	132	0	3	0	2	2	2	3	4	1	0	1	0	0	0	3	0	0	1	1	0	9	3	1	2	8	4	10	2	3	2	6	4	5	14	6	8	1	3	9	9
Root	Bacteria	Proteobacteria	Gammaproteobacteria	Enterobacteriales	Enterobacteriaceae	Sodalis	Sodalis_sp	132	0	0	0	1	0	0	0	0	0	0	0	0	0	0	0	0	0	0	0	0	0	0	0	0	0	0	61	70	0	0	0	0	0	0	0	0	0	0	0	0
Root	Bacteria	Actinobacteria	Coriobacteriia	Coriobacteriales	Coriobacteriaceae	Collinsella	Collinsella stercoris	129	1	0	2	0	0	0	42	34	0	0	3	2	2	2	0	0	4	3	4	4	1	0	1	0	1	0	0	0	0	0	6	4	1	2	5	2	0	0	2	1
Root	Bacteria	Proteobacteria	Betaproteobacteria	SBla14	SBla14_f	SBla14_g	SBla14_sp	127	0	0	0	0	2	1	13	13	1	0	4	1	0	0	0	0	3	0	0	1	21	18	2	1	12	15	4	2	0	0	2	2	0	0	0	1	5	3	0	0
Root	Bacteria	Proteobacteria	Gammaproteobacteria	Chromatiales	Ectothiorhodospiraceae	Ectothiorhodospiraceae_g	Ectothiorhodospiraceae_sp	121	1	2	1	0	10	4	2	3	3	0	2	5	2	2	0	0	1	0	1	1	13	11	2	3	15	11	3	2	0	0	3	6	1	0	2	1	4	3	0	1
Root	Bacteria	Proteobacteria	Gammaproteobacteria	Chromatiales	Chromatiales_f	Chromatiales_g	Chromatiales_sp	116	1	0	0	0	3	4	1	0	1	3	2	2	2	1	0	0	2	3	2	4	17	12	0	0	22	12	3	5	0	0	0	2	0	2	0	0	5	5	0	0
Root	Bacteria	Firmicutes	Erysipelotrichia	Erysipelotrichales	Erysipelotrichaceae	Holdemania	Holdemania_sp	113	1	2	2	3	3	2	22	21	0	0	3	1	3	2	6	3	1	0	1	1	0	0	2	2	0	0	0	0	0	1	2	9	2	3	2	7	0	0	5	1
Root	Bacteria	Proteobacteria	Alphaproteobacteria	Rhodospirillales	Acetobacteraceae	Acetobacteraceae_g	Acetobacteraceae_sp	111	0	0	0	0	0	0	0	0	0	2	11	18	2	0	5	2	0	0	2	0	0	0	0	0	0	0	0	0	0	0	1	0	13	14	3	7	0	0	16	15
Root	Bacteria	Bacteroidetes	Bacteroidia	Bacteroidales	SB-1	SB-1_g	SB-1_sp	107	2	2	0	1	5	2	5	7	1	1	2	1	1	0	0	0	1	0	2	0	14	9	4	2	11	14	10	5	1	1	1	2	0	0	0	0	0	0	0	0
Root	Bacteria	Firmicutes	Clostridia	Clostridiales	Peptococcaceae	Peptococcaceae_g	Peptococcaceae_sp	107	18	7	0	0	0	0	0	1	1	0	0	0	6	3	0	0	2	3	3	1	0	0	11	19	0	0	0	0	5	4	0	1	0	0	9	9	3	1	0	0
Root	Bacteria	Proteobacteria	Gammaproteobacteria	Xanthomonadales	Xanthomonadaceae	Wohlfahrtiimonas	Wohlfahrtiimonas_sp	106	0	0	0	0	0	0	0	0	0	0	1	0	1	0	0	0	0	0	0	0	0	0	0	0	0	0	56	47	1	0	0	0	0	0	0	0	0	0	0	0
Root	Bacteria	Proteobacteria	Gammaproteobacteria	Pasteurellales	Pasteurellaceae	Pasteurellaceae_g	Pasteurellaceae_sp	104	0	2	1	0	1	0	2	0	0	1	2	2	1	2	0	1	0	0	0	0	2	5	2	1	4	12	10	10	0	1	17	14	2	2	2	2	1	1	1	0
Root	Bacteria	Proteobacteria	Gammaproteobacteria	Vibrionales	Vibrionaceae	Vibrio	Vibrio_sp	103	0	0	0	0	0	0	0	0	0	0	0	0	0	0	0	1	0	0	0	0	0	0	0	0	0	0	51	51	0	0	0	0	0	0	0	0	0	0	0	0
Root	Bacteria	Firmicutes	Clostridia	Clostridiales	Ruminococcaceae	Ruminococcus	Ruminococcus albus	102	6	3	10	10	2	0	0	0	0	0	0	0	15	10	5	2	8	4	4	5	0	0	0	0	0	0	0	0	0	0	1	4	0	0	6	1	3	3	0	0
Root	Bacteria	Bacteroidetes	Bacteroidia	Bacteroidales	Rikenellaceae	Alistipes	Alistipes massiliensis	100	1	0	1	0	0	0	1	0	0	0	0	0	28	9	0	1	12	12	11	17	0	0	2	0	0	0	0	0	0	3	0	0	0	0	2	0	0	0	0	0
Root	Bacteria	Firmicutes	Clostridia	Clostridiales	Lachnospiraceae	Moryella	Moryella_sp	100	3	2	3	1	4	5	7	7	0	0	2	0	2	0	0	2	1	0	0	1	0	0	9	10	1	0	1	4	9	11	1	1	2	5	1	1	2	2	0	0
Root	Bacteria	Proteobacteria	Gammaproteobacteria	Pseudomonadales	Moraxellaceae	Acinetobacter	Acinetobacter_sp	97	0	0	0	0	0	0	0	0	0	0	0	0	0	0	0	0	0	0	0	0	0	0	0	0	0	0	52	45	0	0	0	0	0	0	0	0	0	0	0	0
Root	Bacteria	Firmicutes	Bacilli	Gemellales	Gemellaceae	Gemellaceae_g	Gemellaceae_sp	92	5	3	1	0	1	1	1	0	5	0	2	0	0	0	5	3	4	1	4	2	0	0	1	1	0	0	7	4	0	0	0	1	10	5	11	3	4	3	0	4
Root	Bacteria	Bacteroidetes	Flavobacteriia	Flavobacteriales	Flavobacteriaceae	Krokinobacter	Krokinobacter genikus	91	6	3	12	15	2	3	3	0	0	0	1	0	0	0	0	0	1	1	2	2	0	0	10	9	0	0	1	0	6	10	1	2	0	0	0	1	0	0	0	0
Root	Bacteria	Firmicutes	Clostridia	Clostridiales	Lachnospiraceae	Syntrophococcus	Syntrophococcus sucromutans	90	4	0	1	2	0	0	6	6	0	0	0	6	7	6	1	2	1	2	2	1	0	2	2	2	0	0	2	0	1	0	0	4	14	7	2	2	0	1	1	3
Root	Bacteria	Firmicutes	Clostridia	Clostridiales	Ruminococcaceae	Ethanoligenens	Ethanoligenens_sp	90	3	3	7	3	3	3	4	13	1	1	1	2	3	2	0	1	3	0	6	5	0	0	2	0	0	0	3	5	0	1	6	4	2	1	1	0	0	1	0	0
Root	Bacteria	Firmicutes	Clostridia	Clostridiales	Clostridiaceae	Clostridium	Clostridium perfringens	87	1	3	0	0	5	6	6	9	0	1	2	3	1	0	0	1	1	2	3	4	0	1	5	4	1	1	1	2	3	6	0	0	4	4	1	2	0	0	2	2
Root	Bacteria	Actinobacteria	Coriobacteriia	Coriobacteriales	Coriobacteriaceae	Eggerthella	Eggerthella lenta	86	0	0	0	0	0	2	3	0	0	1	1	0	0	0	4	0	0	0	0	0	0	0	0	0	0	0	37	20	1	0	0	1	2	1	0	1	4	4	2	2
Root	Bacteria	Firmicutes	Clostridia	Clostridiales	Peptococcaceae	Peptococcus	Peptococcus_sp	86	0	0	1	0	2	0	12	7	1	0	2	2	4	3	0	5	4	9	13	8	0	0	0	0	0	0	1	2	0	0	0	0	0	0	2	3	2	2	1	0
Root	Bacteria	Firmicutes	Erysipelotrichia	Erysipelotrichales	Erysipelotrichaceae	Bulleidia	Bulleidia_sp	86	0	1	3	3	1	1	0	0	0	0	0	0	6	9	1	0	7	3	3	2	0	0	0	0	1	0	0	0	0	0	10	5	9	11	0	0	0	1	7	2
Root	Bacteria	Proteobacteria	Betaproteobacteria	SC-I-84	SC-I-84_f	SC-I-84_g	SC-I-84_sp	85	1	1	1	7	2	2	5	7	2	3	3	1	0	1	0	0	2	1	3	1	9	5	0	0	3	7	0	1	0	0	0	2	4	4	0	0	1	1	2	3
Root	Bacteria	Firmicutes	Clostridia	Clostridiales	Ruminococcaceae	Oscillospira	Oscillospira guilliermondii	82	2	4	1	3	6	3	6	2	1	0	2	4	2	3	1	0	1	5	2	3	0	0	7	5	0	0	0	2	2	3	1	2	3	0	1	1	0	3	1	0
Root	Bacteria	Bacteroidetes	Bacteroidia	Bacteroidales	Bacteroidaceae	Bacteroides	Bacteroides barnesiae	75	1	1	0	0	0	0	0	0	1	1	0	0	0	0	0	0	0	0	0	0	11	13	2	0	14	18	6	4	0	0	1	0	0	0	1	1	0	0	0	0
Root	Bacteria	Bacteroidetes	Bacteroidia	Bacteroidales	Rikenellaceae	PW3	PW3_sp	74	2	2	0	1	5	1	0	1	1	1	4	2	7	7	0	0	5	6	5	12	0	0	3	4	0	0	0	0	1	3	0	0	1	0	0	0	0	0	0	0
Root	Bacteria	Proteobacteria	Gammaproteobacteria	Alteromonadales	HTCC2188	HTCC2188_g	HTCC2188_sp	73	0	0	0	0	0	0	0	0	0	0	0	0	0	0	0	0	0	1	0	0	0	0	0	0	0	0	35	37	0	0	0	0	0	0	0	0	0	0	0	0
Root	Bacteria	Proteobacteria	Betaproteobacteria	Burkholderiales	Burkholderiales_f	Burkholderiales_g	Burkholderiales_sp	72	0	1	0	5	0	2	8	4	1	1	2	3	1	0	0	0	0	0	1	0	4	3	1	2	6	5	2	1	0	0	1	1	6	1	1	1	5	1	1	1
Root	Bacteria	Proteobacteria	Deltaproteobacteria	Desulfovibrionales	Desulfovibrionaceae	Desulfovibrionaceae_g	Desulfovibrionaceae_sp	71	2	3	1	6	3	3	1	1	3	0	8	7	0	0	0	0	0	0	0	0	0	0	5	6	0	0	0	0	6	9	1	0	1	0	0	3	0	2	0	0
Root	Bacteria	Proteobacteria	Betaproteobacteria	Betaproteobacteria_o	Betaproteobacteria_f	Betaproteobacteria_g	Betaproteobacteria_sp	70	1	1	1	0	0	0	2	5	0	1	2	4	0	0	0	0	0	0	0	1	1	6	0	0	1	6	2	1	0	1	2	2	8	5	0	1	5	2	7	2
Root	Bacteria	Firmicutes	Clostridia	Clostridiales	Lachnospiraceae	Oribacterium	Oribacterium_sp	69	3	2	4	5	5	2	11	7	0	0	1	0	0	2	2	1	0	0	2	3	3	0	1	1	1	0	0	1	3	1	0	0	1	3	1	3	0	0	0	0
Root	Bacteria	Firmicutes	Erysipelotrichia	Erysipelotrichales	Erysipelotrichaceae	Allobaculum	Allobaculum_sp	69	0	0	1	0	1	0	2	1	0	0	0	0	2	1	0	0	0	1	1	1	0	0	0	0	0	0	1	1	0	0	0	0	2	2	0	0	27	23	0	2
Root	Bacteria	Actinobacteria	Coriobacteriia	Coriobacteriales	Coriobacteriaceae	Atopobium	Atopobium vaginae	68	0	0	1	4	0	0	11	8	0	3	6	4	1	0	1	0	1	0	1	1	0	1	1	0	0	1	0	0	0	0	5	7	2	3	1	2	0	0	2	1
Root	Bacteria	Firmicutes	Bacilli	Lactobacillales	Carnobacteriaceae	Granulicatella	Granulicatella_sp	68	0	0	0	1	0	1	1	5	0	0	1	0	0	1	1	1	0	0	0	0	2	0	0	0	0	0	6	4	0	0	0	0	12	12	9	3	0	0	4	4
Root	Bacteria	Proteobacteria	Betaproteobacteria	Methylophilales	Methylophilales_f	Methylophilales_g	Methylophilales_sp	68	2	0	0	0	0	1	1	0	0	0	2	0	2	0	0	0	0	1	1	2	11	10	1	0	12	7	4	2	0	0	0	1	0	0	0	1	4	3	0	0
Root	Bacteria	Bacteroidetes	Bacteroidia	Bacteroidales	Prevotellaceae	YRC22	YRC22_sp	67	0	1	1	2	2	0	0	0	0	0	0	0	3	1	1	3	2	1	1	1	0	0	0	0	0	1	7	3	0	0	0	0	3	9	5	1	0	0	7	12
Root	Bacteria	Proteobacteria	Gammaproteobacteria	Aeromonadales	Aeromonadales_f	Aeromonadales_g	Aeromonadales_sp	67	0	0	0	0	0	0	0	0	0	0	0	0	0	0	0	0	0	0	0	0	0	0	0	0	0	0	28	39	0	0	0	0	0	0	0	0	0	0	0	0
Root	Bacteria	Firmicutes	Bacilli	Bacillales	Staphylococcaceae	Staphylococcus	Staphylococcus_sp	66	1	0	2	2	1	1	1	2	1	0	2	0	1	1	2	4	3	1	2	3	2	1	1	2	1	1	2	5	0	0	3	0	1	6	3	4	0	1	2	1
Root	Bacteria	Firmicutes	Clostridia	Clostridiales	Lachnospiraceae	Marvinbryantia	Marvinbryantia formatexigens	65	2	1	0	1	0	5	7	8	0	1	1	0	0	1	3	1	1	2	0	0	4	0	2	0	1	2	5	5	1	0	0	0	0	0	3	4	0	1	2	1
Root	Bacteria	Firmicutes	Bacilli	Lactobacillales	Streptococcaceae	Lactococcus	Lactococcus_sp	63	2	0	1	1	2	0	0	0	2	2	0	0	1	1	1	0	1	1	0	1	1	4	5	0	2	0	1	2	2	0	1	2	6	8	3	3	2	0	1	4
Root	Bacteria	Proteobacteria	Betaproteobacteria	Burkholderiales	Comamonadaceae	Methylibium	Methylibium_sp	62	3	1	0	0	4	0	0	1	2	2	7	0	1	0	0	0	1	0	0	0	6	3	0	0	6	9	2	1	0	0	0	1	2	3	0	0	2	3	1	1
Root	Bacteria	Proteobacteria	Gammaproteobacteria	HTCC2188	HTCC2188_f	HTCC2188_g	HTCC2188_sp	62	0	0	0	0	0	0	0	0	0	0	0	0	0	0	1	0	0	0	0	0	0	0	0	1	0	0	31	29	0	0	0	0	0	0	0	0	0	0	0	0
Root	Bacteria	Proteobacteria	Betaproteobacteria	Burkholderiales	Burkholderiaceae	Lautropia	Lautropia_sp	59	1	3	0	0	1	0	1	0	0	0	1	0	1	1	1	0	0	0	2	0	9	8	2	0	7	15	0	1	0	0	1	1	2	0	0	0	1	0	0	0
Root	Bacteria	Bacteroidetes	Bacteroidia	Bacteroidales	Bacteroidaceae	Bacteroides	Bacteroides coprosuis	58	4	5	0	1	9	7	0	1	1	0	0	1	0	0	0	1	1	1	0	1	1	1	1	1	1	0	0	0	1	0	0	1	1	0	0	1	9	7	0	0
Root	Bacteria	Firmicutes	Negativicutes	Selenomonadales	Selenomonadaceae	Anaerovibrio	Anaerovibrio_sp	58	0	1	3	0	0	0	1	0	2	1	4	9	0	0	3	1	0	1	0	0	0	0	0	0	0	0	2	0	0	0	0	0	5	2	5	3	4	2	3	6
Root	Bacteria	Firmicutes	Clostridia	Clostridiales	Clostridiaceae	02d06	02d06_sp	56	2	1	2	0	1	1	20	11	1	3	1	2	0	0	0	0	2	2	0	1	0	0	1	0	0	0	1	0	0	0	1	1	1	0	0	0	0	0	1	0
Root	Bacteria	Cyanobacteria	Chloroplast	Streptophyta	Streptophyta_f	Streptophyta_g	Streptophyta_sp	54	0	1	2	0	2	3	2	4	0	5	3	0	0	2	1	1	3	1	4	1	0	0	0	0	0	0	0	1	0	0	0	0	1	2	3	2	1	4	4	1
Root	Bacteria	Firmicutes	Clostridia	Clostridiales	Tissierellaceae	Parvimonas	Parvimonas_sp	54	0	1	4	0	0	0	2	2	0	2	2	1	0	1	1	1	0	2	0	1	0	0	2	1	0	0	3	0	0	0	3	17	3	0	0	2	1	1	0	1
Root	Bacteria	Firmicutes	Bacilli	Bacillales	Bacillaceae	Bacillus	Bacillus_sp	53	1	1	0	0	0	2	0	0	0	1	1	2	0	0	1	1	3	3	2	2	1	1	2	1	0	1	3	5	0	0	0	2	4	3	6	3	0	0	1	0
Root	Bacteria	Actinobacteria	Actinobacteria(class)	Actinomycetales	Corynebacteriaceae	Corynebacterium	Corynebacterium_sp	52	0	0	2	1	0	1	0	2	0	1	2	2	0	2	1	2	1	0	1	2	0	2	0	0	0	0	3	1	0	0	2	5	2	0	3	0	8	4	1	1
Root	Bacteria	Firmicutes	Negativicutes	Selenomonadales	Sporomusaceae	Pelosinus	Pelosinus_sp	52	0	0	1	2	0	1	7	12	1	2	4	4	0	0	1	1	1	0	0	0	0	1	0	0	0	0	2	5	0	0	0	0	0	0	2	1	1	1	0	2
Root	Bacteria	Firmicutes	Bacilli	Bacillales	Planococcaceae	Planococcaceae_g	Planococcaceae_sp	51	2	0	0	0	0	0	1	1	0	0	0	3	1	1	0	0	0	0	2	1	2	0	0	0	0	0	1	1	0	0	0	0	9	18	1	0	0	0	4	3
Root	Bacteria	Firmicutes	Clostridia	Clostridiales	Clostridiaceae	Clostridium	Clostridium celatum	51	4	4	0	0	8	7	0	0	0	0	0	0	1	2	0	0	0	0	0	0	3	0	7	6	1	0	0	0	2	5	0	0	1	0	0	0	0	0	0	0
Root	Bacteria	Proteobacteria	Gammaproteobacteria	Alteromonadales	125ds10	125ds10_g	125ds10_sp	51	0	0	0	0	0	0	0	0	0	0	0	0	0	0	0	0	0	0	0	0	0	0	0	0	0	0	25	26	0	0	0	0	0	0	0	0	0	0	0	0
Root	Bacteria	Firmicutes	Clostridia	Clostridiales	Ruminococcaceae	Ruminococcus	Ruminococcus callidus	50	0	0	0	0	0	0	0	0	0	1	1	1	0	1	1	4	4	4	2	3	0	0	0	0	0	0	0	0	0	0	0	0	5	5	5	6	0	0	6	1
Root	Bacteria	Proteobacteria	Betaproteobacteria	Burkholderiales	Alcaligenaceae	Brackiella	Brackiella oedipodis	50	0	1	1	0	1	0	26	20	1	0	0	0	0	0	0	0	0	0	0	0	0	0	0	0	0	0	0	0	0	0	0	0	0	0	0	0	0	0	0	0
Root	Bacteria	Firmicutes	Clostridia	Clostridiales	Peptococcaceae	Dehalobacterium	Dehalobacterium_sp	49	0	0	1	0	2	0	0	0	1	0	0	4	4	1	0	0	2	2	0	0	0	0	15	5	0	0	0	0	2	3	1	1	1	0	2	0	1	1	0	0
Root	Bacteria	Firmicutes	Clostridia	Clostridiales	Lachnospiraceae	Clostridium	Clostridium fimetarium	49	2	0	2	1	1	2	6	6	0	0	1	1	3	0	0	1	0	1	1	0	1	0	0	0	0	0	3	1	0	0	0	0	3	1	4	2	2	2	1	1
Root	Bacteria	Firmicutes	Clostridia	Clostridiales	Ruminococcaceae	Anaerotruncus	Anaerotruncus_sp	48	1	1	0	1	1	0	1	1	0	2	2	2	3	1	0	0	2	1	1	2	0	0	8	5	0	0	0	0	5	7	0	0	0	0	0	0	1	0	0	0
Root	Bacteria	Firmicutes	Bacilli	Lactobacillales	Streptococcaceae	Streptococcus	Streptococcus infantis	47	0	0	2	1	0	0	1	0	0	0	0	0	1	1	1	2	0	1	1	1	0	0	0	0	0	0	0	0	0	0	1	1	12	11	1	1	1	1	1	5
Root	Bacteria	Firmicutes	Clostridia	Clostridiales	Lachnospiraceae	Pseudobutyrivibrio	Pseudobutyrivibrio_sp	44	2	0	2	5	0	1	3	1	1	1	2	1	1	0	0	0	0	1	1	0	0	0	2	3	0	2	1	0	3	1	1	2	3	3	0	1	0	0	0	0
Root	Bacteria	Proteobacteria	Gammaproteobacteria	Pasteurellales	Pasteurellaceae	Aggregatibacter	Aggregatibacter_sp	44	0	2	1	0	0	0	0	0	0	0	0	1	0	0	0	1	0	0	0	0	1	2	2	0	3	4	2	0	2	0	8	5	1	1	1	2	3	1	1	0
Root	Bacteria	Bacteroidetes	Bacteroidia	Bacteroidales	RF16	RF16_g	RF16_sp	43	1	2	0	1	5	3	0	0	2	2	0	3	4	3	0	0	3	0	3	3	0	0	0	1	0	0	0	0	1	0	0	0	2	0	3	1	0	0	0	0
Root	Bacteria	Bacteroidetes	Flavobacteriia	Flavobacteriales	Flavobacteriaceae	Sufflavibacter	Sufflavibacter maritimus	43	2	5	6	11	0	2	1	0	2	0	3	0	0	0	0	0	1	1	4	1	0	0	0	3	0	0	0	0	0	0	0	0	0	1	0	0	0	0	0	0
Root	Bacteria	Firmicutes	Erysipelotrichia	Erysipelotrichales	Erysipelotrichaceae	Sharpea	Sharpea_sp	41	0	0	0	0	0	0	0	0	0	0	0	0	0	0	0	0	0	0	0	0	0	0	0	0	0	0	0	0	0	1	10	6	8	5	0	0	0	0	6	5
Root	Bacteria	Proteobacteria	Gammaproteobacteria	Enterobacteriales	Enterobacteriaceae	Gluconacetobacter	Gluconacetobacter_sp	41	0	0	0	0	0	0	0	0	0	0	0	0	0	0	0	0	0	0	0	0	0	0	0	0	0	0	18	23	0	0	0	0	0	0	0	0	0	0	0	0
Root	Bacteria	Actinobacteria	Actinobacteria(class)	Bifidobacteriales	Bifidobacteriaceae	Bifidobacterium	Bifidobacterium pseudolongum	40	0	0	0	0	2	0	2	0	0	0	2	1	0	2	0	1	0	2	0	2	0	0	0	0	0	0	1	2	0	0	8	6	1	2	0	0	4	1	0	1
Root	Bacteria	Bacteroidetes	Bacteroidia	Bacteroidales	Porphyromonadaceae	Porphyromonas	Porphyromonas endodontalis	40	3	2	0	1	3	3	0	0	0	0	0	0	0	2	0	0	0	1	0	2	3	1	2	2	0	2	2	3	3	1	1	1	1	0	0	0	0	1	0	0
Root	Bacteria	Firmicutes	Bacilli	Lactobacillales	Streptococcaceae	Streptococcus	Streptococcus luteciae	40	0	0	0	0	0	0	0	0	0	0	0	0	0	0	0	0	0	0	0	0	0	0	0	0	0	0	0	0	0	0	0	0	18	8	1	1	0	1	8	3
Root	Bacteria	Bacteroidetes	Flavobacteriia	Flavobacteriales	Cryomorphaceae	Cryomorphaceae_g	Cryomorphaceae_sp	39	2	0	3	2	0	1	1	2	1	0	0	4	1	0	0	0	1	1	0	1	1	0	0	2	1	1	2	2	0	2	0	2	1	1	0	0	1	1	1	1
Root	Bacteria	Proteobacteria	Gammaproteobacteria	Enterobacteriales	Enterobacteriaceae	Dickeya	Dickeya_sp	39	0	0	0	0	0	0	0	0	0	0	0	0	0	0	0	0	0	0	0	0	0	0	0	0	0	0	14	25	0	0	0	0	0	0	0	0	0	0	0	0
Root	Bacteria	Firmicutes	Clostridia	Clostridiales	Lachnospiraceae	Coprococcus	Coprococcus catus	38	0	0	0	0	0	0	0	0	5	3	7	8	0	0	0	1	0	0	0	0	0	0	0	0	0	0	0	0	0	0	0	0	9	4	0	0	0	0	0	1
Root	Bacteria	Firmicutes	Clostridia	Clostridiales	Tissierellaceae	GW-34	GW-34_sp	38	0	1	0	0	1	0	7	1	1	1	2	0	0	0	0	1	0	1	1	0	1	0	0	0	1	0	6	8	0	0	0	0	1	2	0	1	0	1	0	0
Root	Bacteria	Proteobacteria	Betaproteobacteria	Burkholderiales	Burkholderiaceae	Burkholderiaceae_g	Burkholderiaceae_sp	38	0	1	0	0	1	3	4	2	6	1	0	4	1	0	0	0	0	0	0	0	1	2	1	0	3	5	1	0	0	0	0	0	0	0	1	0	0	0	1	0
Root	Bacteria	Proteobacteria	Gammaproteobacteria	Enterobacteriales	Enterobacteriaceae	Xenorhabdus	Xenorhabdus bovienii	38	0	0	0	0	0	0	0	0	0	0	0	0	1	0	0	0	0	0	0	0	0	0	0	0	0	0	17	17	3	0	0	0	0	0	0	0	0	0	0	0
Root	Archaea	Euryarchaeota	Thermoplasmata	E2	Methanomassiliicoccaceae	Methanomassiliicoccus	Methanomassiliicoccus_sp	37	0	0	0	0	0	0	0	0	0	0	0	0	0	0	0	0	0	0	0	0	0	0	9	10	0	0	0	0	2	6	0	0	0	5	0	0	1	4	0	0
Root	Bacteria	Firmicutes	Erysipelotrichia	Erysipelotrichales	Erysipelotrichaceae	Clostridium	Clostridium cocleatum	37	1	0	0	0	1	2	2	1	0	0	0	0	0	0	0	0	0	0	0	0	0	1	0	0	0	0	4	9	0	0	0	0	4	2	0	0	2	2	2	4
Root	Bacteria	Proteobacteria	Betaproteobacteria	Nitrosomonadales	Nitrosomonadaceae	Nitrosomonadaceae_g	Nitrosomonadaceae_sp	37	0	1	0	0	1	1	2	2	3	2	1	0	0	0	0	0	0	0	0	0	1	5	0	0	2	2	2	0	0	0	2	1	1	3	0	0	3	1	0	1
Root	Bacteria	Proteobacteria	Betaproteobacteria	Rhodocyclales	Rhodocyclaceae	C39	C39_sp	37	0	0	0	0	0	0	0	0	0	2	4	2	0	0	0	0	0	0	0	0	0	0	0	0	0	0	0	0	0	1	0	0	9	4	0	0	0	0	10	5
Root	Bacteria	Actinobacteria	OPB41	OPB41_o	OPB41_f	OPB41_g	OPB41_sp	35	1	0	1	2	2	1	1	3	3	0	1	1	0	0	0	0	0	0	0	0	0	0	1	0	1	0	3	2	0	1	0	2	1	0	2	1	2	1	0	2
Root	Bacteria	Firmicutes	Bacilli	Lactobacillales	Streptococcaceae	Streptococcaceae_g	Streptococcaceae_sp	35	1	2	0	0	0	1	1	0	1	1	0	1	0	0	0	1	1	1	0	1	0	0	0	1	1	0	4	7	0	0	2	1	0	0	1	1	4	0	0	1
Root	Bacteria	Firmicutes	Clostridia	Clostridiales	Tissierellaceae	Sedimentibacter	Sedimentibacter_sp	35	2	2	14	11	2	3	0	0	0	0	0	0	0	0	0	0	0	0	0	0	0	0	0	0	0	0	0	0	1	0	0	0	0	0	0	0	0	0	0	0
Root	Bacteria	Proteobacteria	Betaproteobacteria	Burkholderiales	Comamonadaceae	Ramlibacter	Ramlibacter_sp	35	0	2	0	0	2	3	4	2	1	0	0	0	0	0	0	0	0	0	0	0	5	3	1	0	4	3	2	0	0	0	1	1	0	0	0	1	0	0	0	0
Root	Bacteria	Firmicutes	Bacilli	Gemellales	Gemellales_f	Gemellales_g	Gemellales_sp	34	4	1	1	0	0	0	0	1	0	1	0	0	0	0	1	0	2	2	0	1	0	0	0	1	0	0	5	5	0	0	1	0	2	1	1	1	0	1	2	0
Root	Bacteria	Firmicutes	Clostridia	Clostridiales	Lachnospiraceae	Epulopiscium	Epulopiscium_sp	34	1	0	2	0	0	1	2	4	1	0	1	2	1	0	0	0	0	0	0	1	0	0	3	1	0	0	3	3	0	0	1	2	2	2	0	0	1	0	0	0
Root	Bacteria	Firmicutes	Clostridia	SHA-98	SHA-98_f	SHA-98_g	SHA-98_sp	34	0	0	0	0	0	0	1	0	0	0	0	0	0	0	0	0	0	0	0	0	0	0	6	8	0	0	0	0	6	8	0	0	1	0	1	2	1	0	0	0
Root	Bacteria	Proteobacteria	Gammaproteobacteria	Enterobacteriales	Enterobacteriaceae	Enterobacter	Enterobacter pyrinus	34	0	0	0	0	0	0	0	0	0	0	0	0	0	0	0	0	0	0	0	0	0	0	1	0	0	0	15	17	0	0	0	0	0	0	0	0	1	0	0	0
Root	Bacteria	Proteobacteria	Betaproteobacteria	Burkholderiales	Comamonadaceae	Limnohabitans	Limnohabitans_sp	33	0	0	0	0	1	0	0	1	2	2	1	1	3	0	0	0	1	0	1	0	4	0	0	0	4	8	1	0	0	0	0	0	0	0	0	1	0	1	1	0
Root	Bacteria	Proteobacteria	Betaproteobacteria	Procabacteriales	Procabacteriaceae	Procabacteriaceae_g	Procabacteriaceae_sp	33	0	1	0	0	2	0	0	1	0	1	0	0	0	0	0	0	0	0	0	1	9	4	0	0	3	4	1	0	0	0	2	2	0	0	0	0	1	1	0	0
Root	Bacteria	Proteobacteria	Betaproteobacteria	Rhodocyclales	Rhodocyclaceae	Rhodocyclaceae_g	Rhodocyclaceae_sp	33	3	0	2	1	1	0	0	1	3	1	3	2	0	2	0	0	0	0	0	1	0	2	0	0	2	2	1	0	0	0	2	0	0	0	0	0	0	1	2	1
Root	Bacteria	Firmicutes	Erysipelotrichia	Erysipelotrichales	Erysipelotrichaceae	Catenibacterium	Catenibacterium mitsuokai	32	0	0	0	0	0	0	0	0	0	0	0	0	0	0	0	0	0	0	0	0	0	0	0	0	0	0	0	0	0	0	4	4	3	5	0	0	0	0	5	11
Root	Bacteria	Lentisphaerae	Lentisphaeria	Victivallales	Victivallaceae	Victivallis	Victivallis vadensis	32	6	4	2	5	1	1	0	0	1	2	0	0	0	0	0	0	0	0	0	0	0	0	4	4	0	0	0	0	1	1	0	0	0	0	0	0	0	0	0	0
Root	Bacteria	Firmicutes	Clostridia	Clostridiales	Caldicoprobacteraceae	Caldicoprobacter	Caldicoprobacter_sp	31	0	0	1	1	1	1	1	1	2	1	1	2	4	1	0	2	0	1	1	0	0	0	1	1	0	0	0	0	0	2	0	0	1	2	2	0	0	0	0	1
Root	Bacteria	Proteobacteria	Betaproteobacteria	Thiobacterales	Thiobacterales_f	Thiobacterales_g	Thiobacterales_sp	31	1	1	0	0	0	1	2	0	0	1	1	1	0	0	0	0	0	0	2	0	1	1	0	0	1	1	1	0	0	0	1	0	3	4	1	2	2	1	2	0
Root	Bacteria	Proteobacteria	Gammaproteobacteria	Enterobacteriales	Enterobacteriaceae	Enterobacter	Enterobacter arachidis	30	0	0	0	0	0	0	0	0	0	0	0	0	0	0	0	0	0	0	0	0	0	0	0	0	0	0	17	12	0	0	1	0	0	0	0	0	0	0	0	0
Root	Bacteria	Firmicutes	Bacilli	Gemellales	Gemellaceae	Gemella	Gemella_sp	29	0	0	0	0	0	0	0	0	1	0	2	1	2	0	3	1	0	1	0	0	0	0	1	1	0	0	0	0	0	1	1	0	1	6	2	4	0	0	1	0
Root	Bacteria	Firmicutes	Negativicutes	Acidaminococcales	Acidaminococcaceae	Acidaminococcus	Acidaminococcus_sp	29	1	4	0	1	0	0	7	9	1	0	1	0	0	0	0	0	0	0	0	0	0	0	0	0	0	0	0	2	0	0	0	0	0	0	1	1	0	1	0	0
Root	Bacteria	Firmicutes	Clostridia	Clostridiales	Tissierellaceae	Peptoniphilus	Peptoniphilus_sp	29	0	0	1	1	2	3	5	1	2	1	1	1	1	0	0	0	0	0	1	0	0	0	0	1	0	0	1	1	0	0	0	1	1	0	2	0	0	1	1	0
Root	Bacteria	Firmicutes	Clostridia	Clostridiales	Clostridiaceae	Clostridium	Clostridium intestinale	28	0	1	0	0	1	0	1	5	1	0	1	0	0	2	0	0	0	1	1	1	0	1	2	3	1	0	0	2	1	1	0	0	0	0	0	0	0	0	0	2
Root	Bacteria	Proteobacteria	Gammaproteobacteria	Aeromonadales	Succinivibrionaceae	Succinivibrio	Succinivibrio_sp	28	2	3	1	0	0	0	7	8	1	2	0	0	0	0	0	1	0	0	0	1	0	0	0	0	0	0	0	0	0	0	0	0	0	0	2	0	0	0	0	0
Root	Bacteria	Proteobacteria	Gammaproteobacteria	Vibrionales	Pseudoalteromonadaceae	Pseudoalteromonas	Pseudoalteromonas porphyrae	28	0	0	0	0	0	0	0	0	0	0	0	0	0	0	0	0	0	0	0	0	0	0	0	0	0	0	13	15	0	0	0	0	0	0	0	0	0	0	0	0
Root	Bacteria	Actinobacteria	Actinobacteria(class)	Actinomycetales	Microbacteriaceae	Microbacteriaceae_g	Microbacteriaceae_sp	27	1	0	0	0	1	0	0	0	1	0	1	1	1	0	0	0	1	0	1	1	1	0	0	0	0	0	1	0	0	2	3	1	4	0	2	1	1	2	0	0
Root	Bacteria	Actinobacteria	Actinobacteria(class)	Bifidobacteriales	Bifidobacteriaceae	Bifidobacterium	Bifidobacterium animalis	27	0	0	0	0	0	0	0	2	0	0	0	0	0	0	0	0	0	0	0	0	0	0	0	0	0	0	11	13	0	0	0	0	0	0	1	0	0	0	0	0
Root	Bacteria	Firmicutes	Bacilli	Bacillales	Bacillaceae	Bacillus	Bacillus coahuilensis	27	0	3	0	0	1	0	0	1	0	0	0	0	0	0	0	0	0	0	5	4	0	0	2	0	0	0	1	5	0	0	0	0	1	1	1	1	0	0	0	1
Root	Bacteria	Firmicutes	Bacilli	Bacillales	Bacillaceae	Bacillus	Bacillus ginsengihumi	26	2	1	0	0	0	1	1	0	0	0	0	0	0	0	0	0	0	2	0	5	0	0	0	1	0	1	2	2	0	0	2	2	1	0	2	1	0	0	0	0
Root	Bacteria	Firmicutes	Clostridia	Clostridia_o	Clostridia_f	Clostridia_g	Clostridia_sp	23	0	0	0	0	0	0	0	0	0	0	0	0	1	0	0	0	0	0	0	0	0	0	9	4	0	0	0	0	2	3	0	0	1	0	0	0	0	2	1	0
Root	Bacteria	Firmicutes	Erysipelotrichia	Erysipelotrichales	Erysipelotrichaceae	RFN20	RFN20_sp	23	0	0	1	1	0	1	0	0	1	0	0	0	1	0	0	1	0	0	0	0	0	0	1	0	0	0	2	3	0	0	4	4	1	2	0	0	0	0	0	0
Root	Bacteria	Proteobacteria	Gammaproteobacteria	Pasteurellales	Pasteurellaceae	Actinobacillus	Actinobacillus parahaemolyticus	23	0	0	0	0	0	1	2	0	1	0	0	1	0	0	1	0	0	0	0	0	0	1	1	0	1	3	1	0	0	1	0	3	2	0	1	3	0	0	0	0
Root	Bacteria	Proteobacteria	Gammaproteobacteria	Pasteurellales	Pasteurellaceae	Mannheimia	Mannheimia_sp	23	1	1	0	0	0	0	0	0	2	0	1	0	0	0	0	0	0	0	0	0	1	0	0	0	2	3	1	0	0	1	2	6	0	0	1	0	0	1	0	0
Root	Bacteria	Firmicutes	Bacilli	Bacillales	Planococcaceae	Lysinibacillus	Lysinibacillus_sp	22	2	2	0	0	0	0	0	0	0	0	0	0	0	0	0	0	0	1	2	1	0	0	0	0	0	0	2	1	0	0	1	0	1	2	2	0	0	0	3	2
Root	Bacteria	Firmicutes	Bacilli	Lactobacillales	Streptococcaceae	Streptococcus	Streptococcus equi	22	0	0	0	0	0	0	0	0	0	0	0	0	0	0	0	0	0	0	0	1	0	0	0	0	0	0	0	0	0	0	0	0	9	6	0	0	1	0	3	2
Root	Bacteria	Firmicutes	Clostridia	Clostridiales	Peptococcaceae	rc4-4	rc4-4_sp	22	1	0	1	0	0	0	0	0	0	0	0	0	0	0	0	2	0	0	1	0	0	0	3	1	0	0	0	0	2	1	1	6	0	0	0	2	0	0	0	1
Root	Bacteria	Firmicutes	Clostridia	Clostridiales	Lachnospiraceae	Robinsoniella	Robinsoniella peoriensis	21	2	1	1	1	2	0	0	0	0	0	0	0	1	0	0	2	0	0	0	0	0	0	1	0	0	0	4	4	0	1	0	0	0	0	1	0	0	0	0	0
Root	Bacteria	Proteobacteria	Betaproteobacteria	A21b	EB1003	EB1003_g	EB1003_sp	21	0	0	1	0	0	1	3	3	2	1	1	0	0	0	0	0	0	0	0	0	0	0	1	0	0	1	0	1	0	0	1	1	1	1	0	0	0	1	1	0
Root	Bacteria	Bacteroidetes	Bacteroidia	Bacteroidales	BA008	BA008_g	BA008_sp	20	1	1	0	0	0	3	7	0	0	0	0	0	0	1	0	0	0	0	0	0	0	0	0	0	0	0	1	2	0	0	0	0	0	0	2	0	0	2	0	0
Root	Bacteria	Firmicutes	Bacilli	Lactobacillales	Aerococcaceae	Facklamia	Facklamia_sp	20	0	0	3	0	2	0	0	0	0	0	1	0	0	0	0	0	0	0	2	1	0	0	2	0	0	0	0	1	0	0	2	1	0	2	0	1	1	0	0	1
Root	Bacteria	Firmicutes	Clostridia	Clostridiales	Eubacteriaceae	Eubacterium	Eubacterium_sp	20	0	0	0	0	0	0	0	0	0	0	0	0	1	0	0	0	1	0	0	1	0	0	0	0	0	0	1	0	0	0	2	2	3	2	2	0	1	0	1	3
Root	Bacteria	Fusobacteria	Fusobacteriia	Fusobacteriales	Fusobacteriaceae	Fusobacterium	Fusobacterium_sp	20	0	0	0	1	0	0	0	4	0	0	0	0	0	0	0	0	0	0	0	0	0	0	2	0	0	0	0	4	0	0	2	4	0	0	0	0	0	0	1	2
Root	Bacteria	Actinobacteria	Coriobacteriia	Coriobacteriales	Coriobacteriaceae	Coriobacterium	Coriobacterium_sp	19	0	0	1	0	0	0	5	3	0	1	1	0	1	0	0	0	0	0	0	0	0	0	1	0	0	1	0	0	0	0	0	1	2	1	0	0	0	0	0	1
Root	Bacteria	Proteobacteria	Deltaproteobacteria	Desulfovibrionales	Desulfovibrionaceae	Desulfovibrio	Desulfovibrio vulgaris	19	1	1	1	1	1	2	2	0	2	1	1	1	0	0	0	0	0	0	0	0	0	0	2	1	0	0	0	0	1	0	0	0	0	0	0	1	0	0	0	0
Root	Bacteria	Firmicutes	Clostridia	Clostridiales	Clostridiaceae	Clostridium	Clostridium butyricum	18	0	0	0	0	1	0	1	0	0	0	0	0	0	0	0	0	1	1	2	4	0	0	0	2	0	0	0	0	0	0	0	0	3	1	0	0	0	0	0	2
Root	Bacteria	Bacteroidetes	Flavobacteriia	Flavobacteriales	Flavobacteriaceae	Flavobacteriaceae_g	Flavobacteriaceae_sp	17	0	0	1	1	0	0	0	0	0	2	0	1	2	0	0	0	0	0	0	0	0	0	1	1	0	0	0	3	1	0	0	2	0	1	0	0	1	0	0	0
Root	Bacteria	Proteobacteria	Betaproteobacteria	Burkholderiales	Comamonadaceae	Hylemonella	Hylemonella_sp	17	1	0	0	1	0	0	0	1	0	1	2	1	0	0	0	0	0	0	0	0	1	1	0	1	1	0	0	0	0	0	0	3	0	1	0	0	1	1	0	0
Root	Bacteria	Proteobacteria	Betaproteobacteria	MWH-UniP1	MWH-UniP1_f	MWH-UniP1_g	MWH-UniP1_sp	17	0	1	0	0	0	0	0	1	0	1	2	2	0	0	0	0	0	0	2	0	1	1	0	0	0	1	2	1	0	0	1	0	0	0	0	1	0	0	0	0
Root	Bacteria	Proteobacteria	Betaproteobacteria	Methylophilales	Methylophilaceae	Methylophilaceae_g	Methylophilaceae_sp	17	0	0	1	3	3	2	0	0	0	1	1	1	1	0	0	0	0	1	0	1	0	1	0	0	1	0	0	0	0	0	0	0	0	0	0	0	0	0	0	0
Root	Bacteria	Proteobacteria	Gammaproteobacteria	Enterobacteriales	Enterobacteriaceae	Trabulsiella	Trabulsiella farmeri	17	0	0	0	0	0	0	0	0	0	0	0	0	0	0	0	0	0	0	0	0	0	0	0	0	0	0	6	10	1	0	0	0	0	0	0	0	0	0	0	0
Root	Bacteria	Bacteroidetes	Bacteroidia	Bacteroidales	Bacteroidaceae	BF311	BF311_sp	16	0	0	1	0	2	0	1	0	0	1	1	0	0	1	0	0	0	0	0	0	0	0	0	0	0	0	0	0	0	0	0	0	3	2	0	1	0	0	2	1
Root	Bacteria	Firmicutes	Bacilli	Lactobacillales	Lactobacillales_f	Lactobacillales_g	Lactobacillales_sp	16	0	0	0	1	1	0	0	0	0	0	0	0	0	0	0	0	0	0	1	1	0	0	0	0	0	0	5	3	0	0	1	0	1	0	0	0	0	1	0	1
Root	Bacteria	Proteobacteria	Betaproteobacteria	MND1	MND1_f	MND1_g	MND1_sp	16	0	0	0	0	0	0	0	1	0	0	0	1	1	0	0	0	0	0	0	0	0	0	0	0	3	5	0	0	0	0	2	0	0	0	0	0	0	2	1	0
Root	Bacteria	TM7	TM7-3	TM7-3_o	TM7-3_f	TM7-3_g	TM7-3_sp	16	0	0	0	2	2	0	0	0	0	0	0	2	1	0	0	0	0	0	0	0	0	0	0	0	0	1	1	0	1	0	0	0	1	0	2	0	2	0	0	1
Root	Bacteria	Actinobacteria	Actinobacteria(class)	Actinomycetales	Micrococcaceae	Micrococcaceae_g	Micrococcaceae_sp	15	1	0	2	0	0	1	0	1	0	0	0	1	0	0	1	0	0	1	1	0	0	0	1	1	0	0	0	0	0	0	0	0	0	2	0	0	0	1	1	0
Root	Bacteria	Actinobacteria	Actinobacteria(class)	Bifidobacteriales	Bifidobacteriaceae	Bifidobacterium	Bifidobacterium breve	15	1	1	0	3	0	0	0	0	0	0	0	0	0	0	0	0	0	0	0	2	0	0	0	0	1	0	0	0	0	0	0	1	0	1	0	0	3	2	0	0
Root	Bacteria	Firmicutes	Negativicutes	Acidaminococcales	Acidaminococcaceae	Succinispira	Succinispira mobilis	15	0	1	4	2	0	0	0	0	0	0	0	0	0	0	0	0	0	0	0	0	0	0	0	0	0	0	0	0	0	0	0	0	0	0	0	0	5	3	0	0
Root	Bacteria	Proteobacteria	Betaproteobacteria	Burkholderiales	Oxalobacteraceae	Janthinobacterium	Janthinobacterium lividum	15	0	0	0	0	1	1	0	0	0	3	4	2	0	1	0	0	0	0	0	0	0	0	1	0	1	0	0	1	0	0	0	0	0	0	0	0	0	0	0	0
Root	Bacteria	Proteobacteria	Betaproteobacteria	Methylophilales	Methylophilaceae	Methylobacillus	Methylobacillus_sp	15	0	0	0	1	0	0	1	0	0	0	1	0	0	1	0	0	0	0	0	1	1	0	0	0	2	2	0	0	0	0	0	0	0	0	0	0	3	2	0	0
Root	Bacteria	Proteobacteria	Gammaproteobacteria	Aeromonadales	Succinivibrionaceae	Succinatimonas	Succinatimonas hippei	15	0	0	0	0	0	0	0	0	0	0	0	0	0	0	1	2	0	2	0	0	0	0	0	0	0	0	0	0	0	0	0	0	0	0	5	5	0	0	0	0
Root	Bacteria	Proteobacteria	Gammaproteobacteria	Pasteurellales	Pasteurellaceae	Actinobacillus	Actinobacillus_sp	15	0	0	0	0	0	0	0	0	0	0	0	0	0	0	0	0	0	0	0	0	1	0	0	0	0	2	4	4	0	0	1	1	0	1	1	0	0	0	0	0
Root	Bacteria	Verrucomicrobia	Verrucomicrobiae	Verrucomicrobiales	Verrucomicrobiaceae	Verrucomicrobiaceae_g	Verrucomicrobiaceae_sp	15	0	0	0	3	1	0	0	0	1	0	2	0	0	0	0	0	0	0	0	0	0	0	4	1	0	0	0	0	0	1	0	0	0	0	0	1	0	1	0	0
Root	Bacteria	Actinobacteria	Actinobacteria(class)	Actinomycetales	Micrococcaceae	Rothia	Rothia mucilaginosa	14	1	0	0	2	0	0	0	0	0	1	0	0	0	0	0	0	0	0	0	0	0	0	0	0	0	0	0	0	0	0	0	1	4	1	1	0	0	1	1	1
Root	Bacteria	Firmicutes	Clostridia	Clostridiales	Lachnospiraceae	Clostridium	Clostridium colinum	14	0	1	0	1	1	1	0	1	1	1	0	0	1	0	0	1	0	0	1	1	0	0	0	0	0	0	0	0	0	1	0	0	0	0	1	0	0	1	0	0
Root	Bacteria	Proteobacteria	Alphaproteobacteria	Rhodospirillales	Rhodospirillaceae	Rhodospirillaceae_g	Rhodospirillaceae_sp	14	0	0	0	0	0	0	0	1	0	0	0	0	0	0	0	0	0	0	0	0	3	3	0	0	4	2	1	0	0	0	0	0	0	0	0	0	0	0	0	0
Root	Bacteria	Proteobacteria	Betaproteobacteria	Hydrogenophilales	Hydrogenophilaceae	Thiobacillus	Thiobacillus_sp	14	0	0	0	0	1	2	0	0	1	0	1	1	1	0	0	0	0	0	0	0	0	2	0	0	1	0	1	0	0	0	0	0	0	0	0	0	1	2	0	0
Root	Bacteria	Elusimicrobia	Elusimicrobia	Elusimicrobiales	Elusimicrobiaceae	Elusimicrobiaceae_g	Elusimicrobiaceae_sp	13	0	0	0	0	0	0	0	0	0	0	0	0	0	0	0	0	0	0	0	0	0	0	6	0	0	0	0	0	2	3	0	0	0	0	0	0	0	0	2	0
Root	Bacteria	Firmicutes	Clostridia	Clostridiales	Eubacteriaceae	Anaerofustis	Anaerofustis_sp	13	0	0	0	0	0	0	0	0	0	2	0	0	0	0	0	0	0	0	0	0	0	0	0	0	0	0	6	1	0	2	0	0	0	0	1	0	0	0	0	1
Root	Bacteria	Firmicutes	Clostridia	Clostridiales	Peptostreptococcaceae	Clostridium	Clostridium ruminantium	13	1	0	0	0	1	1	0	2	0	0	0	0	0	1	0	0	0	0	0	0	0	0	0	0	0	0	0	0	0	0	1	0	1	1	0	0	2	0	2	0
Root	Bacteria	Firmicutes	Clostridia	Clostridiales	Peptostreptococcaceae	Tepidibacter	Tepidibacter_sp	13	0	0	0	0	0	0	0	0	0	0	0	0	0	0	0	0	0	0	0	0	0	0	0	1	1	0	3	0	0	0	0	0	5	2	0	1	0	0	0	0
Root	Bacteria	Proteobacteria	Gammaproteobacteria	Pseudomonadales	Moraxellaceae	Moraxellaceae_g	Moraxellaceae_sp	13	0	0	0	0	0	0	0	0	0	0	0	0	0	0	0	0	0	0	0	0	0	0	0	0	0	0	4	9	0	0	0	0	0	0	0	0	0	0	0	0
Root	Bacteria	Firmicutes	Bacilli	Bacillales	Paenibacillaceae	Paenibacillus	Paenibacillus_sp	12	1	0	0	0	0	1	0	0	1	0	0	0	1	0	0	0	0	0	1	0	0	0	0	1	2	0	0	0	0	1	0	1	0	0	1	1	0	0	0	0
Root	Bacteria	Proteobacteria	Betaproteobacteria	Neisseriales	Neisseriaceae	Neisseriaceae_g	Neisseriaceae_sp	12	0	0	0	0	0	0	2	0	0	0	0	1	0	0	0	0	0	0	0	1	2	1	0	0	0	0	0	2	0	0	0	1	0	0	0	0	1	1	0	0
Root	Bacteria	Synergistetes	Synergistia	Synergistales	Synergistaceae	Anaerobaculum	Anaerobaculum_sp	12	0	2	0	0	1	0	0	0	1	0	0	0	0	0	0	0	0	1	0	1	0	0	1	0	0	0	0	0	0	0	0	2	2	1	0	0	0	0	0	0
Root	Bacteria	Verrucomicrobia	Verrucomicrobiae	Verrucomicrobiales	Verrucomicrobiaceae	Akkermansia	Akkermansia_sp	12	0	1	0	1	0	0	0	0	0	0	0	0	0	0	0	0	0	0	0	0	0	0	3	3	0	0	0	0	1	3	0	0	0	0	0	0	0	0	0	0
Root	Bacteria	Bacteroidetes	Bacteroidia	Bacteroidales	p-2534-18B5	p-2534-18B5_g	p-2534-18B5_sp	11	0	0	2	2	1	1	0	0	0	0	0	0	0	0	0	0	3	1	0	1	0	0	0	0	0	0	0	0	0	0	0	0	0	0	0	0	0	0	0	0
Root	Bacteria	Firmicutes	Bacilli	Bacillales	Paenibacillaceae	Paenibacillaceae_g	Paenibacillaceae_sp	11	0	0	0	0	0	0	0	0	0	0	0	0	0	0	1	0	0	1	0	0	0	0	0	0	0	0	0	1	0	0	0	0	6	1	0	0	0	0	0	1
Root	Bacteria	Firmicutes	Bacilli	Bacillales	Staphylococcaceae	Staphylococcus	Staphylococcus aureus	11	0	0	1	0	0	0	0	0	0	1	0	0	0	0	0	0	0	0	0	0	0	1	0	0	0	0	0	1	0	0	1	2	1	2	0	1	0	0	0	0
Root	Bacteria	Firmicutes	Clostridia	Clostridiales	Clostridiaceae	Caloramator	Caloramator_sp	11	0	0	1	1	1	0	0	1	0	1	1	1	0	0	1	0	0	0	0	1	0	0	0	0	0	0	1	0	0	0	0	1	0	0	0	0	0	0	0	0
Root	Bacteria	Firmicutes	Clostridia	Clostridiales	Gracilibacteraceae	Gracilibacter	Gracilibacter_sp	11	0	0	0	0	1	0	0	1	2	0	0	0	1	1	0	0	0	0	0	0	0	0	0	0	0	0	0	0	1	0	0	0	0	1	0	1	1	1	0	0
Root	Bacteria	Firmicutes	Negativicutes	Selenomonadales	Selenomonadaceae	Selenomonas	Selenomonas_sp	11	2	0	0	1	1	2	1	1	0	1	0	0	0	0	0	0	0	0	1	0	0	0	0	0	0	0	0	0	0	0	0	0	0	0	0	0	0	0	1	0
Root	Bacteria	Firmicutes	Clostridia	Clostridiales	Acidaminobacteraceae	WH1-8	WH1-8_sp	11	2	1	1	1	0	0	2	0	0	0	0	0	0	0	0	0	0	0	1	0	0	0	0	0	0	0	1	1	0	0	1	0	0	0	0	0	0	0	0	0
Root	Bacteria	Proteobacteria	Betaproteobacteria	Burkholderiales	Oxalobacteraceae	Massilia	Massilia aerolata	11	0	0	0	0	0	0	1	1	0	0	0	0	0	0	0	0	0	0	0	0	4	2	0	0	0	2	0	0	0	0	0	0	0	0	0	0	0	1	0	0
Root	Bacteria	Proteobacteria	Gammaproteobacteria	Enterobacteriales	Enterobacteriaceae	Samsonia	Samsonia erythrinae	11	0	0	0	0	0	0	0	0	0	0	0	0	0	0	0	0	0	0	0	0	0	0	0	0	0	0	6	5	0	0	0	0	0	0	0	0	0	0	0	0
Root	Bacteria	Proteobacteria	Gammaproteobacteria	Enterobacteriales	Enterobacteriaceae	Yersinia	Yersinia_sp	11	0	0	0	0	0	0	0	0	0	0	0	0	0	0	0	0	0	0	1	0	0	0	3	0	0	0	2	4	1	0	0	0	0	0	0	0	0	0	0	0
Root	Bacteria	Actinobacteria	Actinobacteria(class)	Actinomycetales	Propionibacteriaceae	Propionibacteriaceae_g	Propionibacteriaceae_sp	10	0	0	1	0	0	0	0	0	0	0	0	1	0	0	0	0	1	0	0	0	0	0	0	0	0	0	1	0	0	0	2	2	1	0	0	1	0	0	0	0
Root	Bacteria	Bacteroidetes	Bacteroidia	Bacteroidales	Porphyromonadaceae	Barnesiella	Barnesiella viscericola	10	0	0	0	0	0	1	1	1	0	0	1	2	1	0	0	0	1	1	0	1	0	0	0	0	0	0	0	0	0	0	0	0	0	0	0	0	0	0	0	0
Root	Bacteria	Firmicutes	Bacilli	Bacillales	Bacillaceae	Bacillus	Bacillus humi	10	0	0	0	0	0	1	0	0	0	0	0	0	0	0	0	0	0	1	3	2	0	0	0	0	0	0	1	2	0	0	0	0	0	0	0	0	0	0	0	0
Root	Bacteria	Firmicutes	Bacilli	Lactobacillales	Lactobacillaceae	Lactobacillus	Lactobacillus zeae	10	3	0	0	0	0	0	0	0	0	0	0	0	0	0	0	0	1	0	0	0	1	0	0	0	0	3	1	0	0	0	0	0	0	0	0	1	0	0	0	0
Root	Bacteria	Firmicutes	Clostridia	Clostridiales	Clostridiaceae	Clostridium	Clostridium hiranonis	10	0	0	2	0	0	0	1	1	0	0	0	1	0	0	0	0	0	0	1	1	0	0	0	0	0	0	0	1	0	0	1	0	1	0	0	0	0	0	0	0
Root	Bacteria	Firmicutes	Clostridia	Clostridiales	Peptococcaceae	Desulfosporosinus	Desulfosporosinus meridiei	10	0	2	1	1	0	1	0	0	0	0	0	0	0	0	0	0	0	1	1	0	0	0	0	1	0	0	0	0	0	0	0	0	0	0	1	1	0	0	0	0
Root	Bacteria	Actinobacteria	Actinobacteria(class)	Actinomycetales	Pseudonocardiaceae	Prauserella	Prauserella rugosa	9	0	0	0	0	0	0	0	1	0	0	0	1	0	0	0	0	0	0	0	0	0	0	0	0	0	0	1	0	0	0	1	0	1	1	0	0	0	1	0	2
Root	Bacteria	Actinobacteria	Coriobacteriia	Coriobacteriales	Coriobacteriaceae	Atopobium	Atopobium_sp	9	2	0	0	0	0	0	2	1	0	0	0	0	0	0	0	0	0	0	0	0	0	0	0	0	0	1	0	0	0	0	1	0	2	0	0	0	0	0	0	0
Root	Bacteria	Firmicutes	Bacilli	Lactobacillales	Enterococcaceae	Enterococcaceae_g	Enterococcaceae_sp	9	0	0	0	0	0	0	0	0	0	0	1	0	0	0	0	0	0	0	0	0	0	0	0	0	0	0	4	3	0	0	0	0	0	1	0	0	0	0	0	0
Root	Bacteria	Firmicutes	Bacilli	Lactobacillales	Streptococcaceae	Streptococcus	Streptococcus minor	9	0	0	0	0	0	0	0	0	0	0	0	0	0	0	0	1	0	0	0	0	0	0	0	0	0	0	0	1	0	0	0	0	1	5	0	0	0	0	1	0
Root	Bacteria	Firmicutes	Clostridia	Clostridiales	Christensenellaceae	Christensenella	Christensenella_sp	9	0	0	0	0	0	0	0	0	2	1	0	0	2	1	0	0	0	1	0	0	0	0	0	0	0	0	0	0	0	0	2	0	0	0	0	0	0	0	0	0
Root	Bacteria	Firmicutes	Clostridia	Clostridiales	Clostridiaceae	Sarcina	Sarcina_sp	9	0	0	0	0	1	0	0	1	0	0	0	0	0	1	0	0	0	1	0	0	0	0	1	0	0	0	0	0	0	0	0	0	2	1	0	1	0	0	0	0
Root	Bacteria	Firmicutes	Clostridia	Clostridiales	Gracilibacteraceae	Gracilibacteraceae_g	Gracilibacteraceae_sp	9	0	0	0	0	0	0	0	0	0	0	0	2	0	0	0	0	0	0	0	0	0	0	2	2	0	0	0	0	2	0	0	0	0	0	0	0	0	1	0	0
Root	Bacteria	Firmicutes	Clostridia	Clostridiales	Clostridiales_Incertae Sedis XIII	Anaerovorax	Anaerovorax_sp	9	0	0	0	1	0	1	0	0	0	0	1	1	0	0	0	0	0	0	0	0	0	0	0	0	0	0	1	1	0	1	1	1	0	0	0	0	0	0	0	0
Root	Bacteria	Proteobacteria	Gammaproteobacteria	Gammaproteobacteria_o	Gammaproteobacteria_f	Gammaproteobacteria_g	Gammaproteobacteria_sp	9	0	0	0	0	0	0	0	0	0	0	0	0	0	0	0	0	0	0	1	1	3	0	0	0	3	1	0	0	0	0	0	0	0	0	0	0	0	0	0	0
Root	Bacteria	Proteobacteria	Gammaproteobacteria	Pseudomonadales	Pseudomonadaceae	Pseudomonadaceae_g	Pseudomonadaceae_sp	9	0	0	0	0	0	0	0	0	0	0	0	0	0	0	0	0	0	0	0	0	0	0	0	0	0	0	5	4	0	0	0	0	0	0	0	0	0	0	0	0
Root	Bacteria	Proteobacteria	Zetaproteobacteria	Mariprofundales	Mariprofundaceae	Mariprofundus	Mariprofundus_sp	9	0	1	0	0	0	0	0	0	0	0	0	0	0	1	1	0	0	0	1	0	0	0	0	0	0	0	0	1	0	0	0	2	1	1	0	0	0	0	0	0
Root	Bacteria	Synergistetes	Synergistia	Synergistales	Synergistales_f	Synergistales_g	Synergistales_sp	9	0	0	0	0	0	0	0	0	1	0	0	2	0	0	1	1	0	0	0	0	0	0	0	1	0	0	0	0	0	0	0	0	0	0	0	3	0	0	0	0
Root	Bacteria	Actinobacteria	Actinobacteria(class)	Actinomycetales	Microbacteriaceae	Microbacterium	Microbacterium_sp	8	0	0	0	0	0	0	0	0	0	0	0	0	0	0	0	0	0	0	0	0	0	0	0	0	0	0	0	1	0	0	2	0	1	2	0	0	0	0	1	1
Root	Bacteria	Actinobacteria	Actinobacteria(class)	Actinomycetales	Micrococcaceae	Nesterenkonia	Nesterenkonia_sp	8	0	1	0	0	0	0	0	0	0	0	0	0	0	0	0	0	0	0	1	0	0	0	0	0	0	0	0	0	0	0	2	1	0	0	0	0	2	1	0	0
Root	Bacteria	Bacteroidetes	Bacteroidia	Bacteroidales	BS11	BS11_g	BS11_sp	8	0	0	0	0	0	0	0	0	0	0	0	0	1	0	0	0	1	1	0	1	0	0	0	0	0	0	0	0	0	0	2	1	0	0	0	0	0	0	0	1
Root	Bacteria	Bacteroidetes	Bacteroidia	Bacteroidales	Rikenellaceae	AF12	AF12_sp	8	0	0	0	0	0	0	0	0	0	0	0	0	1	1	0	0	2	0	1	0	0	0	0	0	0	0	0	0	1	1	1	0	0	0	0	0	0	0	0	0
Root	Bacteria	Firmicutes	Bacilli	Lactobacillales	Lactobacillaceae	Lactobacillus	Lactobacillus iners	8	0	2	0	0	1	0	0	0	0	0	0	0	0	0	0	0	0	0	0	0	0	0	0	0	0	0	1	4	0	0	0	0	0	0	0	0	0	0	0	0
Root	Bacteria	Firmicutes	Clostridia	Clostridiales	Clostridiaceae	Clostridium	Clostridium gasigenes	8	0	0	0	0	3	0	0	0	0	0	0	0	0	0	0	0	0	0	0	0	0	0	0	0	1	0	0	0	0	0	0	0	1	1	0	1	0	0	1	0
Root	Bacteria	Firmicutes	Clostridia	Clostridiales	Peptostreptococcaceae	Peptostreptococcus	Peptostreptococcus anaerobius	8	0	0	0	0	0	0	0	0	0	0	0	0	0	0	0	0	0	0	1	0	0	0	0	0	0	0	1	0	0	0	1	2	1	1	1	0	0	0	0	0
Root	Bacteria	Firmicutes	Erysipelotrichia	Erysipelotrichales	Erysipelotrichaceae	Clostridium	Clostridium saccharogumia	8	0	1	0	1	0	0	1	0	0	0	0	0	0	0	0	0	0	0	0	0	0	0	1	1	0	0	0	1	0	0	0	0	0	0	0	0	1	0	1	0
Root	Bacteria	Proteobacteria	Betaproteobacteria	Burkholderiales	Comamonadaceae	Hydrogenophaga	Hydrogenophaga_sp	8	0	0	0	0	0	0	2	4	0	0	0	1	0	0	0	0	0	0	0	0	0	0	0	0	0	0	0	0	0	0	1	0	0	0	0	0	0	0	0	0
Root	Bacteria	Proteobacteria	Gammaproteobacteria	Enterobacteriales	Enterobacteriaceae	Pantoea	Pantoea agglomerans	8	0	0	0	0	0	0	0	0	0	0	0	0	0	0	0	0	0	0	0	0	0	0	0	0	0	0	0	8	0	0	0	0	0	0	0	0	0	0	0	0
Root	Bacteria	Proteobacteria	Gammaproteobacteria	Enterobacteriales	Enterobacteriaceae	Salmonella	Salmonella_sp	8	0	0	0	0	0	0	0	0	0	0	0	0	0	0	0	0	0	0	0	0	0	0	0	0	0	0	2	6	0	0	0	0	0	0	0	0	0	0	0	0
Root	Bacteria	Tenericutes	Mollicutes	Acholeplasmatales	Acholeplasmataceae	Acholeplasma	Acholeplasma_sp	8	0	0	0	0	0	0	0	0	0	0	0	0	0	0	0	0	0	0	0	0	1	0	0	0	0	0	1	3	0	0	0	0	0	1	0	0	0	0	2	0
Root	Bacteria	Tenericutes	Mollicutes	Anaeroplasmatales	Anaeroplasmataceae	Anaeroplasma	Anaeroplasma_sp	8	0	0	0	0	0	0	0	0	0	0	0	1	0	0	0	0	0	0	0	0	0	0	2	2	0	0	0	0	1	0	1	0	1	0	0	0	0	0	0	0
Root	Bacteria	Tenericutes	RF3	ML615J-28	ML615J-28_f	ML615J-28_g	ML615J-28_sp	8	0	0	0	0	0	0	0	0	0	0	0	0	0	0	0	0	0	0	0	0	0	0	2	0	0	0	0	0	2	1	0	0	0	1	0	0	0	2	0	0
Root	Bacteria	Actinobacteria	Actinobacteria(class)	Actinomycetales	Actinomycetaceae	Mobiluncus	Mobiluncus_sp	7	0	0	0	1	0	0	0	0	1	0	0	0	2	0	0	0	0	0	0	0	0	0	0	0	0	0	0	0	0	0	1	0	0	0	1	0	0	0	1	0
Root	Bacteria	Actinobacteria	Actinobacteria(class)	Bifidobacteriales	Bifidobacteriaceae	Alloscardovia	Alloscardovia_sp	7	0	0	0	0	0	0	0	0	0	0	0	0	0	0	0	0	0	0	0	0	0	0	0	0	0	0	0	6	0	0	0	1	0	0	0	0	0	0	0	0
Root	Bacteria	Chlorobi	Chlorobia	Chlorobiales	Chlorobiaceae	Chlorobium	Chlorobium chlorochromatii	7	0	1	0	0	0	0	0	0	1	0	0	0	0	0	0	0	1	0	0	1	0	0	0	0	0	0	0	1	0	0	1	0	0	0	1	0	0	0	0	0
Root	Bacteria	Chlorobi	Ignavibacteria	Ignavibacteriales	Ignavibacteriales_f	Ignavibacteriales_g	Ignavibacteriales_sp	7	0	1	0	0	0	1	0	0	0	0	0	0	1	0	0	0	0	0	0	0	0	1	0	0	1	0	0	0	0	0	0	1	0	1	0	0	0	0	0	0
Root	Bacteria	Chloroflexi	Chloroflexi	Roseiflexales	Roseiflexaceae	Roseiflexus	Roseiflexus_sp	7	0	0	0	0	0	0	1	1	0	0	0	0	0	1	0	0	0	0	0	1	0	0	0	0	0	0	2	0	0	0	0	0	1	0	0	0	0	0	0	0
Root	Bacteria	Firmicutes	Bacilli	Lactobacillales	Streptococcaceae	Streptococcus	Streptococcus anginosus	7	0	0	1	1	0	0	0	0	0	0	0	1	0	0	0	0	0	0	0	0	0	0	0	0	0	0	0	0	0	0	1	1	2	0	0	0	0	0	0	0
Root	Bacteria	Proteobacteria	Gammaproteobacteria	Alteromonadales	Colwelliaceae	Colwelliaceae_g	Colwelliaceae_sp	7	0	0	0	0	0	0	0	0	0	0	0	0	0	0	0	0	0	0	0	0	0	0	0	0	0	0	1	6	0	0	0	0	0	0	0	0	0	0	0	0
Root	Bacteria	Synergistetes	Synergistia	Synergistales	Synergistaceae	Synergistes	Synergistes_sp	7	0	0	0	0	0	0	0	0	0	0	0	0	0	0	0	0	0	0	0	0	0	0	0	0	0	0	0	0	0	0	3	3	1	0	0	0	0	0	0	0
Root	Bacteria	Actinobacteria	Acidimicrobiia	Acidimicrobiales	SC3-41	SC3-41_g	SC3-41_sp	6	1	0	0	0	0	0	1	0	0	1	0	1	0	1	0	0	0	0	0	0	0	0	0	0	0	0	0	0	0	0	0	0	0	0	0	0	0	0	0	1
Root	Bacteria	Actinobacteria	Acidimicrobiia	Acidimicrobiales	ZA3409c	ZA3409c_g	ZA3409c_sp	6	0	1	0	0	0	0	0	0	0	0	1	1	0	0	0	0	2	0	0	0	0	0	0	0	0	0	0	0	0	0	0	0	0	0	0	0	0	0	1	0
Root	Bacteria	Actinobacteria	Nitriliruptoria	Euzebyales	Euzebyaceae	Euzebya	Euzebya_sp	6	1	0	0	0	0	1	0	0	1	0	1	0	0	0	0	0	0	0	0	0	0	0	0	1	0	0	0	0	0	0	0	0	0	0	0	0	0	1	0	0
Root	Bacteria	Bacteroidetes	Bacteroidetes_c	Bacteroidetes_o	Bacteroidetes_f	Bacteroidetes_g	Bacteroidetes_sp	6	0	1	1	0	0	0	1	0	0	0	0	0	0	0	0	0	0	0	0	0	0	0	0	1	0	0	0	0	0	2	0	0	0	0	0	0	0	0	0	0
Root	Bacteria	Bacteroidetes	Bacteroidia	Bacteroidales	Rikenellaceae	Ruminofilibacter	Ruminofilibacter xylanolyticum	6	0	0	0	0	0	0	0	0	0	0	0	0	0	0	0	0	0	0	0	0	0	0	0	0	0	0	0	1	1	2	0	0	0	1	0	0	0	0	1	0
Root	Bacteria	Bacteroidetes	Flavobacteriia	Flavobacteriales	Flavobacteriaceae	Kordia	Kordia_sp	6	0	0	0	0	0	0	0	0	0	0	0	0	0	0	0	0	0	0	2	0	0	0	0	0	0	0	0	0	0	0	3	0	0	0	0	0	1	0	0	0
Root	Bacteria	Chlorobi	OPB56	OPB56_o	OPB56_f	OPB56_g	OPB56_sp	6	0	0	0	0	0	0	0	0	0	0	4	0	0	0	0	0	0	0	0	0	0	0	0	0	0	0	0	0	0	0	0	0	1	0	0	0	0	0	0	1
Root	Bacteria	Firmicutes	Bacilli	Bacillales	Planococcaceae	Rummeliibacillus	Rummeliibacillus_sp	6	1	0	0	1	0	0	0	0	0	0	0	1	0	0	0	0	0	0	0	0	0	0	0	0	0	0	0	0	0	1	1	1	0	0	0	0	0	0	0	0
Root	Bacteria	Firmicutes	Clostridia	Clostridiales	EtOH8	EtOH8_g	EtOH8_sp	6	0	0	0	0	0	0	0	0	0	0	0	0	0	0	0	0	0	0	0	0	0	0	0	2	0	0	0	0	0	3	0	0	0	0	1	0	0	0	0	0
Root	Bacteria	Firmicutes	Clostridia	Clostridiales	Peptostreptococcaceae	Clostridium	Clostridium maritimum	6	0	1	0	0	1	1	0	0	0	0	0	0	0	0	2	0	0	0	0	0	0	0	1	0	0	0	0	0	0	0	0	0	0	0	0	0	0	0	0	0
Root	Bacteria	Firmicutes	Clostridia	Clostridiales	Tissierellaceae	WAL_1855D	WAL_1855D_sp	6	0	0	0	0	0	2	0	0	4	0	0	0	0	0	0	0	0	0	0	0	0	0	0	0	0	0	0	0	0	0	0	0	0	0	0	0	0	0	0	0
Root	Bacteria	Firmicutes	Erysipelotrichia	Erysipelotrichales	Erysipelotrichaceae	Bulleidia	Bulleidia moorei	6	0	0	0	0	0	0	0	0	0	0	0	0	0	2	0	0	0	0	0	0	0	0	0	0	1	0	0	0	0	0	0	0	0	0	0	0	0	0	2	1
Root	Bacteria	Proteobacteria	Betaproteobacteria	Burkholderiales	Comamonadaceae	Thiomonas	Thiomonas_sp	6	0	0	1	0	0	0	0	0	1	0	0	0	0	0	0	0	0	0	1	1	0	0	0	0	0	0	0	0	0	0	0	0	0	0	1	0	1	0	0	0
Root	Bacteria	Proteobacteria	Betaproteobacteria	Rhodocyclales	Rhodocyclaceae	Dechloromonas	Dechloromonas_sp	6	0	0	0	0	1	0	0	1	0	0	0	0	0	0	0	0	0	0	0	1	0	0	0	0	2	0	0	0	0	0	0	0	0	0	0	0	0	0	1	0
Root	Bacteria	Actinobacteria	Actinobacteria(class)	Actinomycetales	Nocardioidaceae	Friedmanniella	Friedmanniella_sp	5	0	0	0	0	0	0	0	0	0	0	0	1	0	0	0	0	0	0	0	2	0	0	0	0	0	0	0	0	0	0	0	1	0	0	0	0	1	0	0	0
Root	Bacteria	Actinobacteria	Actinobacteria(class)	Actinomycetales	Nocardiopsaceae	Nocardiopsaceae_g	Nocardiopsaceae_sp	5	0	0	0	0	0	0	0	1	0	0	0	1	0	0	0	0	0	0	0	0	0	0	0	0	0	0	0	0	0	0	1	0	0	2	0	0	0	0	0	0
Root	Bacteria	Actinobacteria	Actinobacteria(class)	Actinomycetales	Propionibacteriaceae	Propionibacterium	Propionibacterium acnes	5	0	0	0	0	0	0	0	0	0	0	1	0	0	0	0	0	0	0	0	0	0	0	0	0	0	0	1	1	0	0	0	0	0	0	0	1	0	1	0	0
Root	Bacteria	Cyanobacteria	Gloeobacterophycideae	Gloeobacterales	Gloeobacteraceae	Gloeobacter	Gloeobacter violaceus	5	0	0	0	1	0	0	0	0	0	0	0	0	0	0	0	0	0	0	0	0	1	0	0	0	0	0	0	0	0	0	1	0	0	0	0	0	0	1	1	0
Root	Bacteria	Firmicutes	Bacilli	Bacillales	Bacillaceae	Bacillus	Bacillus asahii	5	0	1	0	0	0	0	0	0	0	0	0	0	0	0	0	0	1	0	0	0	0	0	0	0	0	0	0	1	0	0	0	0	2	0	0	0	0	0	0	0
Root	Bacteria	Firmicutes	Bacilli	Bacillales	Bacillaceae	Bacillus	Bacillus muralis	5	0	0	0	0	0	0	0	0	0	0	0	0	0	0	0	2	0	0	0	0	0	0	0	1	0	0	0	0	0	0	0	2	0	0	0	0	0	0	0	0
Root	Bacteria	Firmicutes	Bacilli	Lactobacillales	Lactobacillaceae	Lactobacillus	Lactobacillus reuteri	5	0	0	0	0	0	0	0	0	0	0	0	0	0	0	0	0	0	0	0	0	0	0	0	0	0	0	0	0	0	0	2	2	0	1	0	0	0	0	0	0
Root	Bacteria	Firmicutes	Bacilli	Lactobacillales	Leuconostocaceae	Leuconostoc	Leuconostoc_sp	5	0	0	0	0	0	0	0	0	0	0	0	0	0	0	2	0	0	0	0	0	1	0	1	1	0	0	0	0	0	0	0	0	0	0	0	0	0	0	0	0
Root	Bacteria	Firmicutes	Clostridia	Clostridiales	Lachnospiraceae	Hespellia	Hespellia stercorisuis	5	0	0	0	0	1	0	0	0	0	0	0	0	0	1	0	0	0	0	1	1	0	0	1	0	0	0	0	0	0	0	0	0	0	0	0	0	0	0	0	0
Root	Bacteria	Firmicutes	Clostridia	Clostridiales	Peptococcaceae	Desulfotomaculum	Desulfotomaculum_sp	5	0	0	0	1	0	0	0	0	0	0	2	0	0	0	0	0	0	0	0	0	0	0	0	0	0	0	0	0	0	0	0	0	1	1	0	0	0	0	0	0
Root	Bacteria	Firmicutes	Clostridia	Clostridiales	Peptostreptococcaceae	Filifactor	Filifactor_sp	5	1	0	0	0	1	0	0	0	0	0	0	0	0	1	0	1	1	0	0	0	0	0	0	0	0	0	0	0	0	0	0	0	0	0	0	0	0	0	0	0
Root	Bacteria	Firmicutes	Clostridia	Clostridiales	Tissierellaceae	Tissierellaceae_g	Tissierellaceae_sp	5	0	0	0	0	0	0	0	0	0	0	0	1	0	0	0	0	0	0	0	0	0	0	0	0	0	0	0	0	1	0	0	0	0	3	0	0	0	0	0	0
Root	Bacteria	Gemmatimonadetes	Gemm-2	Gemm-2_o	Gemm-2_f	Gemm-2_g	Gemm-2_sp	5	0	0	0	0	0	0	0	1	0	1	0	0	0	0	0	0	0	0	0	0	0	0	0	0	0	0	1	1	0	0	1	0	0	0	0	0	0	0	0	0
Root	Bacteria	OP9	JS1	BA021	BA021_f	BA021_g	BA021_sp	5	0	0	0	0	0	0	0	0	0	0	1	0	0	0	0	0	0	0	0	0	0	0	0	0	0	0	0	0	0	0	0	0	0	0	0	0	2	2	0	0
Root	Bacteria	OP9	OPB46	OPB72	TIBD11	TIBD11_g	TIBD11_sp	5	0	0	0	0	0	0	0	0	0	0	0	0	0	0	0	1	0	0	0	0	0	0	3	1	0	0	0	0	0	0	0	0	0	0	0	0	0	0	0	0
Root	Bacteria	Proteobacteria	Betaproteobacteria	Burkholderiales	Burkholderiaceae	Burkholderia	Burkholderia_sp	5	0	0	0	0	0	0	1	1	0	0	0	2	0	0	0	0	0	0	0	0	0	0	0	0	0	0	0	0	0	0	0	0	0	0	0	0	0	1	0	0
Root	Bacteria	Proteobacteria	Betaproteobacteria	Burkholderiales	Oxalobacteraceae	Cupriavidus	Cupriavidus_sp	5	0	0	3	0	0	0	1	1	0	0	0	0	0	0	0	0	0	0	0	0	0	0	0	0	0	0	0	0	0	0	0	0	0	0	0	0	0	0	0	0
Root	Bacteria	Proteobacteria	Betaproteobacteria	Rhodocyclales	Rhodocyclaceae	Dok59	Dok59_sp	5	0	0	0	1	0	1	0	0	0	0	0	1	0	0	0	0	0	0	0	0	1	0	0	0	0	0	0	0	0	0	0	0	0	0	1	0	0	0	0	0
Root	Bacteria	Proteobacteria	Epsilonproteobacteria	Campylobacterales	Campylobacteraceae	Campylobacter	Campylobacter_sp	5	2	0	0	0	0	1	0	0	0	0	0	0	0	0	0	0	0	0	0	0	2	0	0	0	0	0	0	0	0	0	0	0	0	0	0	0	0	0	0	0
Root	Bacteria	Proteobacteria	Gammaproteobacteria	Chromatiales	Ectothiorhodospiraceae	Thioalkalivibrio	Thioalkalivibrio_sp	5	0	0	0	0	0	0	0	0	0	3	1	0	1	0	0	0	0	0	0	0	0	0	0	0	0	0	0	0	0	0	0	0	0	0	0	0	0	0	0	0
Root	Bacteria	Proteobacteria	Gammaproteobacteria	Enterobacteriales	Enterobacteriaceae	Citrobacter	Citrobacter freundii	5	0	0	0	0	0	0	0	0	0	0	0	0	0	0	0	0	0	0	0	0	0	0	1	0	0	0	3	1	0	0	0	0	0	0	0	0	0	0	0	0
Root	Bacteria	Proteobacteria	Gammaproteobacteria	Pasteurellales	Pasteurellaceae	Haemophilus	Haemophilus parasuis	5	0	0	0	0	0	0	0	0	0	0	0	0	0	0	0	0	0	0	0	0	0	0	1	0	0	0	2	1	0	0	1	0	0	0	0	0	0	0	0	0
Root	Bacteria	Actinobacteria	Acidimicrobiia	Acidimicrobiales	C111	C111_g	C111_sp	4	0	0	1	0	0	0	1	0	0	1	0	0	0	0	1	0	0	0	0	0	0	0	0	0	0	0	0	0	0	0	0	0	0	0	0	0	0	0	0	0
Root	Bacteria	Actinobacteria	Actinobacteria(class)	Actinomycetales	Actinomycetales_f	Actinomycetales_g	Actinomycetales_sp	4	0	0	0	0	0	0	0	0	0	0	0	0	0	0	0	0	0	0	0	0	0	0	0	0	0	0	0	0	0	0	0	1	0	1	0	0	0	2	0	0
Root	Bacteria	Actinobacteria	Actinobacteria(class)	Actinomycetales	Pseudonocardiaceae	Pseudonocardiaceae_g	Pseudonocardiaceae_sp	4	0	0	0	0	0	0	0	0	0	0	0	0	0	0	0	0	0	0	0	0	0	0	1	0	0	0	0	0	0	0	1	2	0	0	0	0	0	0	0	0
Root	Bacteria	Actinobacteria	Actinobacteria(class)	Actinomycetales	Streptomycetaceae	Streptomyces	Streptomyces_sp	4	0	0	0	0	0	0	0	0	0	0	0	0	0	0	0	0	0	0	0	0	1	0	0	0	0	0	1	0	0	0	0	1	0	0	0	1	0	0	0	0
Root	Bacteria	Bacteroidetes	Flavobacteriia	Flavobacteriales	Flavobacteriaceae	Polaribacter	Polaribacter_sp	4	0	0	0	1	1	0	0	0	0	0	0	0	0	0	0	0	0	0	0	0	0	0	1	0	0	0	0	0	0	1	0	0	0	0	0	0	0	0	0	0
Root	Bacteria	Firmicutes	Bacilli	Bacillales	Bacillaceae	Bacillus	Bacillus flexus	4	0	0	0	1	0	0	0	0	0	1	0	0	0	0	0	0	0	0	0	0	0	0	0	0	0	0	1	0	0	0	0	0	0	1	0	0	0	0	0	0
Root	Bacteria	Firmicutes	Bacilli	Lactobacillales	Carnobacteriaceae	Trichococcus	Trichococcus_sp	4	0	0	0	0	0	0	0	0	0	0	0	0	0	0	0	0	1	0	0	0	1	0	0	0	0	0	0	1	0	0	0	0	1	0	0	0	0	0	0	0
Root	Bacteria	Firmicutes	Bacilli	Lactobacillales	Lactobacillaceae	Lactobacillus	Lactobacillus coleohominis	4	1	0	0	0	0	0	0	0	0	0	0	0	0	0	0	0	0	0	0	0	0	0	0	0	0	0	0	1	0	0	2	0	0	0	0	0	0	0	0	0
Root	Bacteria	Firmicutes	Clostridia	Clostridiales	Clostridiaceae	Alkaliphilus	Alkaliphilus_sp	4	0	0	0	0	0	0	0	0	0	0	0	0	0	0	0	0	0	0	0	0	0	0	0	0	0	0	0	0	0	0	0	0	2	0	0	1	0	0	1	0
Root	Bacteria	Firmicutes	Clostridia	Clostridiales	Clostridiaceae	Alkaliphilus	Alkaliphilus transvaalensis	4	0	0	0	0	0	0	0	0	0	0	0	0	0	0	0	0	0	0	0	0	0	0	1	0	0	1	0	0	0	0	0	0	0	0	1	1	0	0	0	0
Root	Bacteria	Firmicutes	Clostridia	Clostridiales	Peptococcaceae	Peptococcaceae_g	Peptococcaceae_sp	4	1	1	0	0	0	0	0	0	0	0	0	0	0	0	0	0	0	0	0	0	0	0	1	1	0	0	0	0	0	0	0	0	0	0	0	0	0	0	0	0
Root	Bacteria	Firmicutes	Clostridia	Clostridiales	Eubacteriaceae	Pseudoramibacter_Eubacterium	Pseudoramibacter_Eubacterium_sp	4	0	0	0	0	0	0	0	0	0	0	0	0	0	0	0	0	0	0	0	0	0	0	0	0	0	0	0	1	0	0	1	0	0	0	0	0	1	0	1	0
Root	Bacteria	Firmicutes	Clostridia	Clostridiales	Heliobacteriaceae	Heliobacteriaceae_g	Heliobacteriaceae_sp	4	0	0	1	0	0	0	0	0	0	0	0	0	0	0	0	0	0	0	2	0	0	0	0	0	0	0	0	0	0	0	0	0	0	0	0	0	1	0	0	0
Root	Bacteria	Firmicutes	Clostridia	Clostridiales	Peptococcaceae	Desulfosporosinus	Desulfosporosinus_sp	4	0	0	1	2	0	0	0	0	0	0	0	0	0	0	0	0	0	0	0	0	0	0	0	0	0	0	0	0	0	1	0	0	0	0	0	0	0	0	0	0
Root	Bacteria	Firmicutes	Negativicutes	Selenomonadales	Sporomusaceae	Thermosinus	Thermosinus_sp	4	0	1	0	0	0	0	0	0	1	0	0	0	0	0	1	0	0	0	0	0	0	0	0	0	0	0	0	0	1	0	0	0	0	0	0	0	0	0	0	0
Root	Bacteria	Firmicutes	Clostridia	Thermoanaerobacterales	Thermoanaerobacterales_f	Thermoanaerobacterales_g	Thermoanaerobacterales_sp	4	1	0	0	0	0	0	0	0	0	0	0	0	0	0	0	0	0	0	0	1	0	0	1	0	0	0	0	0	0	0	0	0	1	0	0	0	0	0	0	0
Root	Bacteria	Fusobacteria	Fusobacteriia	Fusobacteriales	Leptotrichiaceae	Leptotrichia	Leptotrichia_sp	4	2	0	0	0	0	0	0	0	0	0	0	0	0	0	0	0	0	0	0	0	0	0	0	0	0	0	1	0	0	0	0	0	1	0	0	0	0	0	0	0
Root	Bacteria	Gemmatimonadetes	Gemm-6	Gemm-6_o	Gemm-6_f	Gemm-6_g	Gemm-6_sp	4	0	1	0	0	0	0	0	0	0	0	0	0	0	0	1	0	0	0	0	0	0	0	0	1	0	0	0	0	0	0	0	1	0	0	0	0	0	0	0	0
Root	Bacteria	Proteobacteria	Betaproteobacteria	Rhodocyclales	Rhodocyclaceae	Sulfuritalea	Sulfuritalea_sp	4	0	0	0	0	0	0	0	0	0	0	0	1	0	0	0	0	0	0	0	0	0	0	0	0	0	0	0	0	0	0	0	0	0	0	0	0	0	0	2	1
Root	Bacteria	Proteobacteria	Deltaproteobacteria	Desulfovibrionales	Desulfovibrionaceae	Desulfovibrio	Desulfovibrio D168	4	0	1	0	2	0	0	0	0	0	0	0	0	0	0	0	0	0	0	0	0	0	0	0	0	0	0	0	0	1	0	0	0	0	0	0	0	0	0	0	0
Root	Bacteria	Proteobacteria	Gammaproteobacteria	Enterobacteriales	Enterobacteriaceae	Cronobacter	Cronobacter sakazakii	4	0	0	0	0	0	0	0	0	0	0	0	0	0	0	0	0	0	0	0	0	0	0	0	0	0	0	4	0	0	0	0	0	0	0	0	0	0	0	0	0
Root	Bacteria	Proteobacteria	Gammaproteobacteria	Enterobacteriales	Enterobacteriaceae	Edwardsiella	Edwardsiella_sp	4	0	0	0	0	0	0	0	0	0	0	0	0	0	0	0	0	0	0	0	0	0	0	0	0	0	0	1	3	0	0	0	0	0	0	0	0	0	0	0	0
Root	Bacteria	Proteobacteria	Gammaproteobacteria	Enterobacteriales	Enterobacteriaceae	Enterobacter	Enterobacter cowanii	4	0	0	0	0	0	0	0	0	0	0	0	0	0	0	0	0	0	0	0	0	0	0	0	0	0	0	2	2	0	0	0	0	0	0	0	0	0	0	0	0
Root	Bacteria	Proteobacteria	Gammaproteobacteria	Enterobacteriales	Enterobacteriaceae	Escherichia	Escherichia blattae	4	0	0	0	0	0	0	0	0	0	0	0	0	0	0	0	0	0	0	0	0	0	0	0	0	0	0	1	3	0	0	0	0	0	0	0	0	0	0	0	0
Root	Bacteria	Proteobacteria	Gammaproteobacteria	Enterobacteriales	Enterobacteriaceae	Kleidoceria	Kleidoceria schneideri	4	0	0	0	0	0	0	0	0	0	0	0	0	0	0	0	0	0	0	0	0	0	0	2	1	0	0	0	0	0	1	0	0	0	0	0	0	0	0	0	0
Root	Bacteria	Proteobacteria	Gammaproteobacteria	Enterobacteriales	Enterobacteriaceae	Salmonella	Salmonella enterica	4	0	0	0	0	0	0	0	0	0	0	0	0	0	0	0	0	0	0	0	0	0	0	0	0	0	0	1	1	0	0	0	0	0	0	0	0	0	0	1	1
Root	Bacteria	Proteobacteria	Gammaproteobacteria	Pasteurellales	Pasteurellales_f	Pasteurellales_g	Pasteurellales_sp	4	0	0	0	0	0	0	0	0	0	0	0	0	0	0	0	0	0	0	0	0	0	0	0	0	0	0	2	2	0	0	0	0	0	0	0	0	0	0	0	0
Root	Bacteria	Proteobacteria	Gammaproteobacteria	Vibrionales	Pseudoalteromonadaceae	Pseudoalteromonadaceae_g	Pseudoalteromonadaceae_sp	4	0	0	0	0	0	0	0	0	0	0	0	0	0	0	0	0	0	0	0	0	0	0	0	0	0	0	2	2	0	0	0	0	0	0	0	0	0	0	0	0
Root	Bacteria	Proteobacteria	Gammaproteobacteria	Xanthomonadales	Xanthomonadaceae	Xanthomonadaceae_g	Xanthomonadaceae_sp	4	0	0	0	0	0	0	0	0	0	0	0	0	0	0	0	0	0	0	0	0	0	0	0	0	0	0	1	2	0	0	0	0	0	0	1	0	0	0	0	0
Root	Bacteria	SAR406	AB16	Arctic96B-7	A714017	A714017_g	A714017_sp	4	0	0	1	0	0	0	0	0	0	0	1	0	0	0	0	0	0	0	1	0	0	1	0	0	0	0	0	0	0	0	0	0	0	0	0	0	0	0	0	0
Root	Bacteria	Spirochaetes	Spirochaetes	Spirochaetales	Spirochaetaceae	Treponema	Treponema_sp	4	0	0	0	0	0	0	0	0	0	0	0	0	0	0	1	0	0	0	0	0	0	0	0	0	0	0	0	0	0	0	0	0	1	1	0	0	0	0	1	0
Root	Bacteria	TM7	TM7-3	CW040	CW040_f	CW040_g	CW040_sp	4	0	0	0	0	0	0	1	0	0	0	0	0	0	0	0	1	0	0	0	0	0	0	0	0	0	0	0	0	0	0	0	0	0	0	0	2	0	0	0	0
Root	Bacteria	TM7	TM7-3	CW040	F16	F16_g	F16_sp	4	0	0	0	0	0	0	0	0	0	0	0	0	0	0	0	0	0	0	0	0	2	2	0	0	0	0	0	0	0	0	0	0	0	0	0	0	0	0	0	0
Root	Archaea	Euryarchaeota	Methanobacteria	Methanobacteriales	Methanobacteriaceae	Methanobacterium	Methanobacterium_sp	3	0	0	0	0	0	0	0	0	0	0	0	0	0	0	0	0	0	0	0	0	0	0	1	1	0	0	0	0	0	1	0	0	0	0	0	0	0	0	0	0
Root	Bacteria	Actinobacteria	Acidimicrobiia	Acidimicrobiales	Acidimicrobiales_f	Acidimicrobiales_g	Acidimicrobiales_sp	3	0	0	0	0	0	1	0	0	0	0	0	0	0	0	0	0	0	0	0	0	0	0	0	0	0	0	0	0	0	0	0	0	0	1	0	0	0	0	0	1
Root	Bacteria	Actinobacteria	Actinobacteria(class)	Actinomycetales	ACK-M1	ACK-M1_g	ACK-M1_sp	3	1	0	0	0	0	0	0	0	0	0	2	0	0	0	0	0	0	0	0	0	0	0	0	0	0	0	0	0	0	0	0	0	0	0	0	0	0	0	0	0
Root	Bacteria	Actinobacteria	Actinobacteria(class)	Actinomycetales	Actinomycetaceae	Actinomycetaceae_g	Actinomycetaceae_sp	3	0	0	0	0	0	0	0	0	1	0	0	0	0	0	0	0	0	0	0	0	0	0	0	0	0	2	0	0	0	0	0	0	0	0	0	0	0	0	0	0
Root	Bacteria	Actinobacteria	Actinobacteria(class)	Actinomycetales	Sanguibacteraceae	Sanguibacteraceae_g	Sanguibacteraceae_sp	3	0	0	0	0	0	0	0	0	0	0	0	0	0	1	0	0	0	0	0	1	0	0	0	0	0	0	0	0	0	0	0	1	0	0	0	0	0	0	0	0
Root	Bacteria	Actinobacteria	Actinobacteria(class)	Bifidobacteriales	Bifidobacteriaceae	Gardnerella	Gardnerella_sp	3	0	0	0	0	0	0	0	0	0	0	0	0	0	0	0	0	0	0	0	0	0	0	0	0	0	0	0	0	0	0	1	0	2	0	0	0	0	0	0	0
Root	Bacteria	Bacteroidetes	Bacteroidia	Bacteroidales	Prevotellaceae	Prevotella	Prevotella nigrescens	3	0	0	0	0	0	0	0	0	0	0	0	0	0	0	0	0	0	0	0	0	0	0	2	0	0	0	0	0	0	0	0	0	1	0	0	0	0	0	0	0
Root	Bacteria	Bacteroidetes	Sphingobacteriia	Sphingobacteriales	Sphingobacteriaceae	Sphingobacteriaceae_g	Sphingobacteriaceae_sp	3	0	0	0	0	1	0	0	0	0	0	0	0	0	0	0	0	0	0	1	0	0	0	0	0	0	1	0	0	0	0	0	0	0	0	0	0	0	0	0	0
Root	Bacteria	Bacteroidetes	Sphingobacteriia	Sphingobacteriales	Sphingobacteriaceae	Olivibacter	Olivibacter sitiensis	3	0	0	0	0	0	0	0	0	0	0	0	1	0	0	0	0	0	0	0	0	0	0	0	0	0	0	0	0	0	0	0	0	1	1	0	0	0	0	0	0
Root	Bacteria	Chloroflexi	Anaerolineae	SJA-15	SJA-15_f	SJA-15_g	SJA-15_sp	3	0	0	0	0	0	0	0	0	0	0	0	0	0	0	0	0	0	0	0	0	0	0	0	0	0	0	0	0	0	0	0	1	0	0	1	0	1	0	0	0
Root	Bacteria	Firmicutes	Bacilli	Lactobacillales	Aerococcaceae	Aerococcus	Aerococcus_sp	3	0	0	0	0	0	0	0	0	0	0	0	0	0	0	0	0	0	1	0	0	0	0	0	0	0	0	0	0	0	0	0	2	0	0	0	0	0	0	0	0
Root	Bacteria	Firmicutes	Bacilli	Lactobacillales	Carnobacteriaceae	Carnobacteriaceae_g	Carnobacteriaceae_sp	3	1	0	0	0	0	0	0	0	0	0	0	0	0	0	0	0	0	0	0	0	0	0	0	0	0	0	1	1	0	0	0	0	0	0	0	0	0	0	0	0
Root	Bacteria	Firmicutes	Bacilli	Lactobacillales	Enterococcaceae	Melissococcus	Melissococcus plutonius	3	1	0	0	0	0	0	0	0	0	0	0	0	0	0	0	0	0	0	0	0	0	0	0	0	0	0	0	1	0	0	0	0	0	1	0	0	0	0	0	0
Root	Bacteria	Firmicutes	Clostridia	Clostridiales	Clostridiaceae	Clostridium	Clostridium acidurici	3	0	0	0	0	0	0	0	0	0	0	0	0	0	0	0	0	0	0	0	0	0	0	0	0	0	0	1	0	0	0	0	0	2	0	0	0	0	0	0	0
Root	Bacteria	Firmicutes	Clostridia	Clostridiales	Clostridiaceae	Clostridium	Clostridium ljungdahlii	3	0	0	0	0	0	0	0	0	0	0	1	2	0	0	0	0	0	0	0	0	0	0	0	0	0	0	0	0	0	0	0	0	0	0	0	0	0	0	0	0
Root	Bacteria	Firmicutes	Clostridia	Clostridiales	Clostridiaceae	Clostridium	Clostridium tetani	3	0	1	1	0	0	0	0	0	0	0	0	0	0	0	0	0	1	0	0	0	0	0	0	0	0	0	0	0	0	0	0	0	0	0	0	0	0	0	0	0
Root	Bacteria	Firmicutes	Clostridia	Clostridiales	Lachnospiraceae	Catonella	Catonella_sp	3	0	0	0	0	0	0	0	0	0	0	0	0	0	1	0	0	0	1	0	0	0	0	0	0	0	0	0	0	0	0	0	0	0	0	1	0	0	0	0	0
Root	Bacteria	Firmicutes	Clostridia	Clostridiales	Peptococcaceae	Sporotomaculum	Sporotomaculum_sp	3	0	0	0	0	0	0	0	0	0	0	0	0	2	1	0	0	0	0	0	0	0	0	0	0	0	0	0	0	0	0	0	0	0	0	0	0	0	0	0	0
Root	Bacteria	Firmicutes	Clostridia	Clostridiales	Peptostreptococcaceae	Clostridium	Clostridium metallolevans	3	2	0	0	0	0	0	0	0	0	0	0	0	0	0	0	0	0	0	0	0	0	0	0	0	0	0	0	0	0	0	0	0	0	0	1	0	0	0	0	0
Root	Bacteria	Firmicutes	Clostridia	Clostridiales	Peptostreptococcaceae	Peptostreptococcus	Peptostreptococcus_sp	3	0	0	0	0	0	0	0	0	0	0	0	0	0	0	0	0	0	0	0	0	0	0	0	0	0	0	0	0	0	0	0	1	1	0	1	0	0	0	0	0
Root	Bacteria	Firmicutes	Clostridia	Clostridiales	Ruminococcaceae	Faecalibacterium	Faecalibacterium_sp	3	0	0	0	0	1	0	0	1	0	0	0	0	0	1	0	0	0	0	0	0	0	0	0	0	0	0	0	0	0	0	0	0	0	0	0	0	0	0	0	0
Root	Bacteria	Firmicutes	Clostridia	Clostridiales	Ruminococcaceae	Sporobacter	Sporobacter termitidis	3	0	0	0	1	0	0	0	0	1	0	0	0	0	0	0	0	0	0	0	0	0	0	0	0	0	0	0	0	0	0	0	0	0	0	1	0	0	0	0	0
Root	Bacteria	Firmicutes	Clostridia	Clostridiales	Tissierellaceae	Anaerococcus	Anaerococcus_sp	3	0	0	0	0	0	0	0	0	0	0	0	0	0	0	0	0	0	0	0	0	0	0	0	2	0	0	0	0	0	0	0	0	0	0	0	0	1	0	0	0
Root	Bacteria	Firmicutes	Clostridia	Thermoanaerobacterales	Thermoanaerobacteraceae	Thermacetogenium	Thermacetogenium_sp	3	0	0	0	0	0	0	0	0	0	0	1	0	0	0	0	0	0	0	0	0	0	0	0	0	0	0	0	0	0	0	0	1	0	0	0	0	0	0	0	1
Root	Bacteria	Firmicutes	Erysipelotrichia	Erysipelotrichales	Erysipelotrichaceae	gut	gut metagenome	3	0	0	0	0	0	0	0	0	1	0	0	0	0	1	0	0	0	0	0	0	0	0	0	0	0	0	0	0	0	0	0	0	0	1	0	0	0	0	0	0
Root	Bacteria	NKB19	NKB19_c	NKB19_o	NKB19_f	NKB19_g	NKB19_sp	3	0	0	0	1	1	0	0	0	0	0	1	0	0	0	0	0	0	0	0	0	0	0	0	0	0	0	0	0	0	0	0	0	0	0	0	0	0	0	0	0
Root	Bacteria	Proteobacteria	Betaproteobacteria	Burkholderiales	Comamonadaceae	Acidovorax	Acidovorax_sp	3	0	0	0	0	0	0	0	0	0	0	0	1	0	0	0	0	0	0	0	0	0	1	0	0	0	0	0	0	0	0	0	0	0	0	0	0	0	1	0	0
Root	Bacteria	Proteobacteria	Betaproteobacteria	Burkholderiales	Oxalobacteraceae	Janthinobacterium	Janthinobacterium_sp	3	0	0	0	1	0	0	0	0	0	0	0	0	0	0	0	0	1	0	1	0	0	0	0	0	0	0	0	0	0	0	0	0	0	0	0	0	0	0	0	0
Root	Bacteria	Proteobacteria	Betaproteobacteria	Neisseriales	Neisseriaceae	Eikenella	Eikenella_sp	3	0	0	0	0	0	0	0	1	0	0	0	0	0	0	1	1	0	0	0	0	0	0	0	0	0	0	0	0	0	0	0	0	0	0	0	0	0	0	0	0
Root	Bacteria	Proteobacteria	Betaproteobacteria	Neisseriales	Neisseriaceae	Neisseria	Neisseria_sp	3	0	0	0	0	0	0	0	0	0	0	0	0	0	0	0	1	0	0	0	0	0	0	0	0	0	0	0	0	0	0	0	2	0	0	0	0	0	0	0	0
Root	Bacteria	Proteobacteria	Gammaproteobacteria	Alteromonadales	Idiomarinaceae	Idiomarinaceae_g	Idiomarinaceae_sp	3	0	0	0	0	0	0	0	0	0	0	0	0	0	0	0	0	0	0	0	0	0	0	0	0	0	0	0	2	1	0	0	0	0	0	0	0	0	0	0	0
Root	Bacteria	Proteobacteria	Gammaproteobacteria	Alteromonadales	Shewanellaceae	Shewanella	Shewanella benthica	3	0	0	0	0	0	0	0	0	0	0	0	0	0	0	0	0	0	0	0	0	0	0	0	0	0	0	3	0	0	0	0	0	0	0	0	0	0	0	0	0
Root	Bacteria	Proteobacteria	Gammaproteobacteria	Alteromonadales	Alteromonadaceae	Alishewanella	Alishewanella_sp	3	0	0	0	0	0	0	0	0	0	0	0	0	0	0	0	0	0	0	0	0	0	0	0	0	0	0	2	1	0	0	0	0	0	0	0	0	0	0	0	0
Root	Bacteria	Proteobacteria	Gammaproteobacteria	Enterobacteriales	Enterobacteriaceae	Cronobacter	Cronobacter turicensis	3	0	0	0	0	0	0	0	0	0	0	0	0	0	0	0	0	0	0	0	1	0	0	0	0	0	0	0	1	0	0	0	0	0	1	0	0	0	0	0	0
Root	Bacteria	Proteobacteria	Gammaproteobacteria	Enterobacteriales	Enterobacteriaceae	Enterobacter	Enterobacter_sp	3	0	0	0	0	0	0	0	0	0	0	0	0	0	0	0	0	0	0	0	0	0	0	0	0	0	0	2	1	0	0	0	0	0	0	0	0	0	0	0	0
Root	Bacteria	Proteobacteria	Gammaproteobacteria	Enterobacteriales	Enterobacteriaceae	Erwinia	Erwinia chrysanthemi	3	0	0	0	0	0	0	0	0	0	0	0	0	0	0	0	0	0	0	0	0	0	0	0	0	0	0	0	3	0	0	0	0	0	0	0	0	0	0	0	0
Root	Bacteria	Proteobacteria	Gammaproteobacteria	Enterobacteriales	Enterobacteriaceae	Erwinia	Erwinia oleae	3	0	0	0	0	0	0	0	0	0	0	0	0	0	0	0	0	0	0	0	0	0	0	0	0	0	0	1	2	0	0	0	0	0	0	0	0	0	0	0	0
Root	Bacteria	Proteobacteria	Gammaproteobacteria	Enterobacteriales	Enterobacteriaceae	Morganella	Morganella morganii	3	0	0	0	0	0	0	0	0	0	0	0	0	0	0	0	0	0	0	0	0	0	0	0	0	0	0	0	0	0	0	0	0	0	0	0	0	2	0	1	0
Root	Bacteria	Proteobacteria	Gammaproteobacteria	Enterobacteriales	Enterobacteriaceae	Pragia	Pragia fontium	3	0	0	0	0	0	0	0	0	0	0	0	0	0	0	0	0	0	0	0	0	0	0	0	0	0	0	0	2	1	0	0	0	0	0	0	0	0	0	0	0
Root	Bacteria	Proteobacteria	Gammaproteobacteria	Enterobacteriales	Enterobacteriaceae	Proteus	Proteus_sp	3	0	0	0	0	0	0	0	0	0	0	0	0	0	0	0	0	0	0	0	0	0	0	0	0	0	0	1	2	0	0	0	0	0	0	0	0	0	0	0	0
Root	Bacteria	Proteobacteria	Gammaproteobacteria	Enterobacteriales	Enterobacteriaceae	Providencia	Providencia_sp	3	0	0	0	0	0	0	0	0	0	0	0	0	0	0	0	0	0	0	0	0	0	0	0	0	0	0	2	1	0	0	0	0	0	0	0	0	0	0	0	0
Root	Bacteria	Proteobacteria	Gammaproteobacteria	Xanthomonadales	Sinobacteraceae	Sinobacteraceae_g	Sinobacteraceae_sp	3	0	0	0	0	0	0	0	0	0	0	0	0	0	0	0	0	0	0	0	0	0	0	0	0	0	0	1	1	0	0	0	0	0	0	0	0	1	0	0	0
Root	Bacteria	Spirochaetes	Brachyspirae	Brachyspirales	Brachyspiraceae	Brachyspira	Brachyspira_sp	3	0	0	0	0	0	0	0	0	2	1	0	0	0	0	0	0	0	0	0	0	0	0	0	0	0	0	0	0	0	0	0	0	0	0	0	0	0	0	0	0
Root	Bacteria	TM6	SJA-4	SJA-4_o	SJA-4_f	SJA-4_g	SJA-4_sp	3	0	0	0	0	1	0	0	0	0	0	0	1	0	0	0	0	0	1	0	0	0	0	0	0	0	0	0	0	0	0	0	0	0	0	0	0	0	0	0	0
Root	Bacteria	TM7	TM7-3	EW055	EW055_f	EW055_g	EW055_sp	3	0	0	0	0	1	0	0	0	0	0	0	0	1	0	0	0	0	0	0	0	0	0	0	0	0	0	0	0	0	0	0	0	0	0	0	0	0	0	0	1
Root	Bacteria	Tenericutes	CK-1C4-19	CK-1C4-19_o	CK-1C4-19_f	CK-1C4-19_g	CK-1C4-19_sp	3	0	0	1	0	0	0	0	0	0	0	0	0	0	0	0	0	0	0	0	0	0	0	0	0	0	0	0	0	0	0	0	0	0	0	0	2	0	0	0	0
Root	Bacteria	Tenericutes	Mollicutes	Anaeroplasmatales	Anaeroplasmataceae	Anaeroplasmataceae_g	Anaeroplasmataceae_sp	3	0	0	0	0	0	0	0	0	0	1	0	1	0	0	0	0	0	0	0	0	0	0	0	1	0	0	0	0	0	0	0	0	0	0	0	0	0	0	0	0
Root	Archaea	Euryarchaeota	Methanobacteria	Methanobacteriales	Methanobacteriaceae	Methanobrevibacter	Methanobrevibacter arboriphilus	2	0	0	0	0	0	0	0	0	0	0	0	0	0	0	0	0	0	0	0	0	0	0	0	0	0	0	0	0	2	0	0	0	0	0	0	0	0	0	0	0
Root	Archaea	Euryarchaeota	Thermoplasmata	E2	Methanomassiliicoccaceae	Methanomassiliicoccaceae_g	Methanomassiliicoccaceae_sp	2	0	0	0	0	0	0	0	0	0	0	0	0	0	0	0	0	0	0	0	0	0	0	0	0	0	0	0	0	2	0	0	0	0	0	0	0	0	0	0	0
Root	Bacteria	Actinobacteria	Actinobacteria(class)	Actinomycetales	Corynebacteriaceae	Corynebacterium	Corynebacterium durum	2	0	0	0	0	0	0	0	0	0	0	0	0	0	0	0	0	0	0	0	0	0	0	0	0	0	0	0	0	0	0	0	0	0	1	0	1	0	0	0	0
Root	Bacteria	Actinobacteria	Actinobacteria(class)	Actinomycetales	Microbacteriaceae	CandidatusRhodoluna	CandidatusRhodoluna_sp	2	0	0	0	0	0	0	0	0	0	0	0	0	0	0	0	0	1	0	0	0	0	0	1	0	0	0	0	0	0	0	0	0	0	0	0	0	0	0	0	0
Root	Bacteria	Actinobacteria	Actinobacteria(class)	Actinomycetales	Nocardiaceae	Nocardia	Nocardia_sp	2	0	0	0	0	0	0	0	0	0	0	0	0	0	0	0	0	0	0	0	0	0	0	0	0	0	0	1	0	0	0	0	0	1	0	0	0	0	0	0	0
Root	Bacteria	Actinobacteria	Actinobacteria(class)	Actinomycetales	Nocardioidaceae	Nocardioidaceae_g	Nocardioidaceae_sp	2	0	0	0	1	0	1	0	0	0	0	0	0	0	0	0	0	0	0	0	0	0	0	0	0	0	0	0	0	0	0	0	0	0	0	0	0	0	0	0	0
Root	Bacteria	Actinobacteria	Actinobacteria(class)	Actinomycetales	Propionibacteriaceae	Propionibacterium	Propionibacterium_sp	2	0	0	0	0	0	0	0	0	1	0	0	0	0	0	0	0	0	0	0	0	0	0	0	0	0	0	0	0	0	0	1	0	0	0	0	0	0	0	0	0
Root	Bacteria	Actinobacteria	Actinobacteria(class)	Actinomycetales	Pseudonocardiaceae	Saccharomonospora	Saccharomonospora_sp	2	0	0	0	0	0	0	0	0	0	0	0	0	0	0	0	1	0	0	1	0	0	0	0	0	0	0	0	0	0	0	0	0	0	0	0	0	0	0	0	0
Root	Bacteria	Actinobacteria	Actinobacteria(class)	Actinomycetales	Streptomycetaceae	Streptomyces	Streptomyces mirabilis	2	0	0	0	0	0	0	0	0	0	0	0	0	0	0	0	0	0	1	0	0	0	0	0	0	0	0	0	0	0	0	0	0	0	0	0	0	0	1	0	0
Root	Bacteria	Actinobacteria	Actinobacteria(class)	Bifidobacteriales	Bifidobacteriaceae	Bombiscardovia	Bombiscardovia_sp	2	0	0	0	0	0	0	0	0	0	0	0	0	0	0	0	0	0	0	0	0	0	0	0	0	0	0	0	0	0	0	1	0	0	1	0	0	0	0	0	0
Root	Bacteria	Actinobacteria	Coriobacteriia	Coriobacteriales	Coriobacteriaceae	Eggerthella	Eggerthella_sp	2	0	0	0	0	0	0	0	0	0	0	0	0	0	0	0	0	0	0	0	0	0	0	0	0	0	0	0	0	0	0	0	0	1	0	0	0	1	0	0	0
Root	Bacteria	BRC1	BRC1_c	BRC1_o	BRC1_f	BRC1_g	BRC1_sp	2	0	0	0	0	0	0	0	0	0	0	0	0	0	0	0	0	0	0	0	0	0	0	1	0	0	0	0	0	0	0	0	1	0	0	0	0	0	0	0	0
Root	Bacteria	Bacteroidetes	Bacteroidia	Bacteroidales	Bacteroidaceae	Bacteroides	Bacteroides nordii	2	0	0	0	0	0	0	0	0	0	0	0	0	0	0	0	0	0	0	0	0	0	0	0	0	0	0	0	0	1	0	0	0	1	0	0	0	0	0	0	0
Root	Bacteria	Bacteroidetes	Bacteroidia	Bacteroidales	VC21_Bac22	VC21_Bac22_g	VC21_Bac22_sp	2	0	0	0	0	0	1	0	0	0	0	0	0	0	0	0	0	0	1	0	0	0	0	0	0	0	0	0	0	0	0	0	0	0	0	0	0	0	0	0	0
Root	Bacteria	Bacteroidetes	Flavobacteriia	Flavobacteriales	Flavobacteriaceae	Psychroflexus	Psychroflexus_sp	2	0	0	0	0	0	1	0	0	0	0	0	0	0	0	0	0	0	0	0	0	0	0	0	0	0	0	0	0	0	0	0	0	0	0	0	0	1	0	0	0
Root	Bacteria	Bacteroidetes	Sphingobacteriia	Sphingobacteriales	Sphingobacteriaceae	Sphingobacterium	Sphingobacterium_sp	2	0	0	0	0	0	0	0	0	0	0	0	0	0	0	0	0	0	0	0	0	1	1	0	0	0	0	0	0	0	0	0	0	0	0	0	0	0	0	0	0
Root	Bacteria	Bacteroidetes	Saprospirae	Saprospirales	Chitinophagaceae	Chitinophagaceae_g	Chitinophagaceae_sp	2	1	0	0	0	0	0	0	0	0	0	0	0	0	0	0	0	1	0	0	0	0	0	0	0	0	0	0	0	0	0	0	0	0	0	0	0	0	0	0	0
Root	Bacteria	Bacteroidetes	Saprospirae	Saprospirales	Chitinophagaceae	Sediminibacterium	Sediminibacterium_sp	2	0	0	0	0	0	0	0	0	0	1	0	0	0	0	0	0	0	0	0	0	0	0	0	0	0	0	1	0	0	0	0	0	0	0	0	0	0	0	0	0
Root	Bacteria	Cyanobacteria	ML635J-21	ML635J-21_o	ML635J-21_f	ML635J-21_g	ML635J-21_sp	2	0	0	0	0	0	0	0	0	0	0	0	0	0	0	0	0	0	0	0	0	0	0	0	0	0	0	0	0	0	0	0	0	0	0	1	0	0	0	1	0
Root	Bacteria	Firmicutes	Bacilli	Bacillales	Bacillaceae	Anaerobacillus	Anaerobacillus_sp	2	0	0	0	0	0	0	0	0	0	0	0	0	0	0	1	0	0	0	0	0	0	0	0	0	0	0	1	0	0	0	0	0	0	0	0	0	0	0	0	0
Root	Bacteria	Firmicutes	Bacilli	Bacillales	Bacillaceae	Virgibacillus	Virgibacillus_sp	2	0	1	0	0	0	0	0	0	0	0	0	0	0	0	0	0	0	0	1	0	0	0	0	0	0	0	0	0	0	0	0	0	0	0	0	0	0	0	0	0
Root	Bacteria	Firmicutes	Bacilli	Bacillales	Planococcaceae	Solibacillus	Solibacillus_sp	2	0	0	0	0	0	0	0	0	0	0	0	0	0	0	0	0	0	0	0	0	0	0	0	0	0	0	0	0	0	0	0	1	0	0	0	1	0	0	0	0
Root	Bacteria	Firmicutes	Bacilli	Bacillales	Planococcaceae	Ureibacillus	Ureibacillus_sp	2	0	0	0	0	0	0	0	0	0	0	0	0	0	0	0	0	0	0	0	0	0	0	0	0	0	0	0	0	0	0	0	0	0	2	0	0	0	0	0	0
Root	Bacteria	Firmicutes	Bacilli	Bacillales	Staphylococcaceae	Jeotgalicoccus	Jeotgalicoccus psychrophilus	2	0	0	0	0	0	0	0	0	0	0	0	0	0	0	0	0	0	0	0	0	0	0	0	0	0	0	0	0	0	0	0	0	0	1	0	0	0	0	1	0
Root	Bacteria	Firmicutes	Bacilli	Bacillales	Staphylococcaceae	Macrococcus	Macrococcus caseolyticus	2	0	0	0	0	0	0	0	0	0	0	0	0	0	0	0	0	0	0	0	0	0	0	0	0	0	0	0	0	0	0	0	1	0	0	1	0	0	0	0	0
Root	Bacteria	Firmicutes	Bacilli	Bacillales	Staphylococcaceae	Staphylococcus	Staphylococcus succinus	2	0	0	0	1	0	0	0	0	0	0	0	0	0	0	0	0	0	0	0	0	0	0	0	0	0	0	0	0	0	0	0	0	0	0	0	1	0	0	0	0
Root	Bacteria	Firmicutes	Bacilli	Haloplasmatales	Haloplasmataceae	Haloplasma	Haloplasma contractile	2	0	0	0	0	1	0	0	0	0	0	0	0	0	0	1	0	0	0	0	0	0	0	0	0	0	0	0	0	0	0	0	0	0	0	0	0	0	0	0	0
Root	Bacteria	Firmicutes	Bacilli	Lactobacillales	Enterococcaceae	Enterococcus	Enterococcus casseliflavus	2	0	0	0	0	0	0	0	0	0	0	0	0	0	0	0	0	0	0	0	0	0	0	0	0	0	0	1	1	0	0	0	0	0	0	0	0	0	0	0	0
Root	Bacteria	Firmicutes	Bacilli	Lactobacillales	Enterococcaceae	Enterococcus	Enterococcus haemoperoxidus	2	0	0	0	0	0	0	0	0	0	0	0	0	0	0	0	0	0	0	0	0	0	0	0	0	0	0	1	0	0	0	1	0	0	0	0	0	0	0	0	0
Root	Bacteria	Firmicutes	Bacilli	Lactobacillales	Enterococcaceae	Vagococcus	Vagococcus_sp	2	0	0	0	0	0	0	0	0	0	0	0	0	0	0	0	1	0	0	0	0	0	0	0	0	0	0	0	0	0	0	0	0	1	0	0	0	0	0	0	0
Root	Bacteria	Firmicutes	Bacilli	Lactobacillales	Lactobacillaceae	Lactobacillus	Lactobacillus brevis	2	0	0	0	0	0	0	0	0	0	0	0	0	0	0	0	0	0	0	0	0	0	0	0	0	0	0	0	0	0	0	0	1	0	1	0	0	0	0	0	0
Root	Bacteria	Firmicutes	Bacilli	Lactobacillales	Leuconostocaceae	Oenococcus	Oenococcus kitaharae	2	0	0	0	0	0	0	0	1	0	0	0	0	0	0	0	1	0	0	0	0	0	0	0	0	0	0	0	0	0	0	0	0	0	0	0	0	0	0	0	0
Root	Bacteria	Firmicutes	Clostridia	Clostridiales	Clostridiaceae	Clostridium	Clostridium tyrobutyricum	2	0	0	0	0	0	0	1	0	0	0	0	0	0	0	0	0	0	0	0	0	0	0	0	0	0	0	1	0	0	0	0	0	0	0	0	0	0	0	0	0
Root	Bacteria	Firmicutes	Clostridia	Clostridiales	Lachnospiraceae	Moryella	Moryella indoligenes	2	0	0	0	0	0	0	0	0	0	0	0	0	0	0	0	0	0	0	0	0	0	0	1	0	0	0	0	0	0	0	1	0	0	0	0	0	0	0	0	0
Root	Bacteria	Firmicutes	Clostridia	Clostridiales	Peptococcaceae	Dehalobacter_Syntrophobotulus	Dehalobacter_Syntrophobotulus_sp	2	0	0	0	0	0	0	0	0	0	0	0	0	0	0	0	0	0	0	0	0	0	0	1	0	0	0	0	0	0	1	0	0	0	0	0	0	0	0	0	0
Root	Bacteria	Firmicutes	Clostridia	Clostridiales	Ruminococcaceae	Papillibacter	Papillibacter cinnamivorans	2	0	0	0	0	0	0	0	0	0	0	1	0	0	0	0	0	0	0	0	0	0	0	0	0	0	0	0	0	0	0	0	0	0	0	1	0	0	0	0	0
Root	Bacteria	Firmicutes	Clostridia	Clostridiales	Acidaminobacteraceae	Acidaminobacteraceae_g	Acidaminobacteraceae_sp	2	0	0	0	0	0	0	0	0	0	0	0	0	0	1	0	0	0	1	0	0	0	0	0	0	0	0	0	0	0	0	0	0	0	0	0	0	0	0	0	0
Root	Bacteria	Firmicutes	Clostridia	Clostridiales	Tissierellaceae	1968-01-01	Jan-68_sp	2	0	0	0	0	0	1	0	0	0	0	0	0	0	0	0	0	0	0	0	0	0	0	0	0	0	0	0	0	0	0	0	0	0	0	0	1	0	0	0	0
Root	Bacteria	Firmicutes	Clostridia	Clostridiales	Tissierellaceae	Finegoldia	Finegoldia_sp	2	0	1	0	0	0	0	0	0	0	0	0	0	0	0	0	0	0	0	0	0	0	0	0	0	0	0	0	0	0	0	0	0	0	0	0	0	0	1	0	0
Root	Bacteria	Firmicutes	Clostridia	Halanaerobiales	Halobacteroidaceae	Halanaerobacter	Halanaerobacter_sp	2	0	0	0	0	0	0	0	0	0	0	0	0	0	0	0	0	0	0	0	0	0	0	0	0	0	0	0	0	0	0	0	0	0	0	0	0	0	1	0	1
Root	Bacteria	Firmicutes	Erysipelotrichia	Erysipelotrichales	Erysipelotrichaceae	Bulleidia	Bulleidia p-1630-c5	2	1	0	0	0	0	0	0	0	0	0	0	0	0	0	0	0	0	0	0	0	0	0	0	1	0	0	0	0	0	0	0	0	0	0	0	0	0	0	0	0
Root	Bacteria	Firmicutes	Erysipelotrichia	Erysipelotrichales	Erysipelotrichaceae	PSB-M-3	PSB-M-3_sp	2	0	0	0	0	0	0	1	0	0	0	0	0	0	0	0	0	0	0	0	0	0	0	0	0	0	0	0	0	0	0	0	1	0	0	0	0	0	0	0	0
Root	Bacteria	Gemmatimonadetes	Gemmatimonadetes	Gemmatimonadetes_o	Gemmatimonadetes_f	Gemmatimonadetes_g	Gemmatimonadetes_sp	2	0	0	0	0	0	0	0	0	0	0	0	0	0	0	0	0	0	0	1	0	0	0	0	0	0	0	0	0	0	0	0	0	0	1	0	0	0	0	0	0
Root	Bacteria	Proteobacteria	Alphaproteobacteria	Alphaproteobacteria_o	Alphaproteobacteria_f	Alphaproteobacteria_g	Alphaproteobacteria_sp	2	0	0	0	0	0	0	0	0	0	0	0	0	0	0	0	0	2	0	0	0	0	0	0	0	0	0	0	0	0	0	0	0	0	0	0	0	0	0	0	0
Root	Bacteria	Proteobacteria	Alphaproteobacteria	Rhodospirillales	Rhodospirillales_f	Rhodospirillales_g	Rhodospirillales_sp	2	0	0	0	0	1	0	0	0	0	0	0	1	0	0	0	0	0	0	0	0	0	0	0	0	0	0	0	0	0	0	0	0	0	0	0	0	0	0	0	0
Root	Bacteria	Proteobacteria	Betaproteobacteria	Burkholderiales	Alcaligenaceae	Oligella	Oligella_sp	2	0	0	0	0	0	0	0	0	0	0	0	0	0	0	0	0	0	0	0	0	0	0	0	0	0	0	0	0	0	0	0	0	0	0	0	0	0	1	1	0
Root	Bacteria	Proteobacteria	Betaproteobacteria	Burkholderiales	Comamonadaceae	Aquincola	Aquincola tertiaricarbonis	2	0	0	1	1	0	0	0	0	0	0	0	0	0	0	0	0	0	0	0	0	0	0	0	0	0	0	0	0	0	0	0	0	0	0	0	0	0	0	0	0
Root	Bacteria	Proteobacteria	Betaproteobacteria	Burkholderiales	Comamonadaceae	Comamonas	Comamonas_sp	2	0	0	0	0	0	0	0	0	0	0	1	0	0	0	0	0	0	0	1	0	0	0	0	0	0	0	0	0	0	0	0	0	0	0	0	0	0	0	0	0
Root	Bacteria	Proteobacteria	Betaproteobacteria	Burkholderiales	Oxalobacteraceae	Oxalobacter	Oxalobacter_sp	2	0	0	0	0	0	0	0	0	0	0	0	0	0	0	0	0	0	0	0	0	0	1	0	0	0	0	0	0	0	0	0	1	0	0	0	0	0	0	0	0
Root	Bacteria	Proteobacteria	Deltaproteobacteria	Deltaproteobacteria_o	Deltaproteobacteria_f	Deltaproteobacteria_g	Deltaproteobacteria_sp	2	0	0	0	1	0	0	0	0	0	0	0	0	0	0	0	0	0	0	0	0	0	0	0	0	0	0	1	0	0	0	0	0	0	0	0	0	0	0	0	0
Root	Bacteria	Proteobacteria	Deltaproteobacteria	Desulfovibrionales	Desulfovibrionaceae	Desulfovibrio	Desulfovibrio C21_c20	2	0	0	0	0	0	0	0	0	0	0	0	0	0	0	0	0	0	0	0	0	0	0	1	0	0	0	0	0	1	0	0	0	0	0	0	0	0	0	0	0
Root	Bacteria	Proteobacteria	Epsilonproteobacteria	Campylobacterales	Campylobacteraceae	Campylobacter	Campylobacter ureolyticus	2	0	0	0	0	0	0	0	0	0	0	0	0	0	0	0	0	0	0	2	0	0	0	0	0	0	0	0	0	0	0	0	0	0	0	0	0	0	0	0	0
Root	Bacteria	Proteobacteria	Epsilonproteobacteria	Campylobacterales	Campylobacteraceae	Sulfurospirillum	Sulfurospirillum_sp	2	0	0	0	0	0	0	0	1	0	0	0	0	0	0	0	0	0	0	0	0	0	0	0	0	0	0	0	0	0	0	0	0	0	0	1	0	0	0	0	0
Root	Bacteria	Proteobacteria	Gammaproteobacteria	Alteromonadales	Alteromonadales_f	Alteromonadales_g	Alteromonadales_sp	2	0	0	0	0	0	0	0	0	0	0	0	0	0	0	0	0	0	0	0	0	0	0	0	0	0	0	1	1	0	0	0	0	0	0	0	0	0	0	0	0
Root	Bacteria	Proteobacteria	Gammaproteobacteria	Alteromonadales	Shewanellaceae	Shewanella	Shewanella_sp	2	0	0	0	0	0	0	0	0	0	0	0	0	0	0	0	0	0	0	0	0	0	0	0	0	0	0	0	2	0	0	0	0	0	0	0	0	0	0	0	0
Root	Bacteria	Proteobacteria	Gammaproteobacteria	Alteromonadales	Shewanellaceae	Shewanella	Shewanella pacifica	2	0	0	0	0	0	0	0	0	0	0	0	0	0	0	0	0	0	0	0	0	0	0	0	0	0	0	0	2	0	0	0	0	0	0	0	0	0	0	0	0
Root	Bacteria	Proteobacteria	Gammaproteobacteria	Chromatiales	Halothiobacillaceae	Halothiobacillaceae_g	Halothiobacillaceae_sp	2	0	0	0	0	0	0	0	0	0	0	0	0	0	0	0	0	0	0	0	0	0	0	0	0	0	0	1	1	0	0	0	0	0	0	0	0	0	0	0	0
Root	Bacteria	Proteobacteria	Gammaproteobacteria	Enterobacteriales	Enterobacteriaceae	Enterobacter	Enterobacter aerogenes	2	0	0	0	0	0	0	0	0	0	0	0	0	0	0	0	0	0	0	0	0	0	0	0	0	0	0	2	0	0	0	0	0	0	0	0	0	0	0	0	0
Root	Bacteria	Proteobacteria	Gammaproteobacteria	Enterobacteriales	Enterobacteriaceae	Enterobacter	Enterobacter hormaechei	2	0	0	0	0	0	0	0	0	0	0	0	0	0	0	0	0	0	0	0	0	0	0	0	0	0	0	1	1	0	0	0	0	0	0	0	0	0	0	0	0
Root	Bacteria	Proteobacteria	Gammaproteobacteria	Enterobacteriales	Enterobacteriaceae	Morganella	Morganella_sp	2	0	0	0	0	0	0	0	0	0	0	0	0	0	0	0	0	0	0	0	0	0	0	0	0	0	0	0	0	0	0	1	0	0	0	0	0	1	0	0	0
Root	Bacteria	Proteobacteria	Gammaproteobacteria	Enterobacteriales	Enterobacteriaceae	Shigella	Shigella sonnei	2	0	0	0	0	0	0	0	0	0	0	0	0	0	0	0	0	0	0	0	0	0	0	0	0	0	0	1	1	0	0	0	0	0	0	0	0	0	0	0	0
Root	Bacteria	Proteobacteria	Gammaproteobacteria	Enterobacteriales	Enterobacteriaceae	Xenorhabdus	Xenorhabdus nematophila	2	0	0	0	0	0	0	0	0	0	0	0	0	0	0	0	0	0	0	0	0	0	0	0	0	0	0	0	2	0	0	0	0	0	0	0	0	0	0	0	0
Root	Bacteria	Proteobacteria	Gammaproteobacteria	Legionellales	Coxiellaceae	Coxiellaceae_g	Coxiellaceae_sp	2	0	0	0	0	1	0	0	0	0	0	1	0	0	0	0	0	0	0	0	0	0	0	0	0	0	0	0	0	0	0	0	0	0	0	0	0	0	0	0	0
Root	Bacteria	Proteobacteria	Gammaproteobacteria	Oceanospirillales	Oleiphilaceae	Oleiphilaceae_g	Oleiphilaceae_sp	2	0	0	0	0	0	0	0	0	0	0	0	0	0	0	0	0	0	0	0	0	0	0	0	0	0	0	0	2	0	0	0	0	0	0	0	0	0	0	0	0
Root	Bacteria	Proteobacteria	Gammaproteobacteria	Pasteurellales	Pasteurellaceae	Aggregatibacter	Aggregatibacter pneumotropica	2	0	0	0	0	0	0	0	0	0	0	0	0	1	0	0	0	0	0	0	0	0	0	0	1	0	0	0	0	0	0	0	0	0	0	0	0	0	0	0	0
Root	Bacteria	Proteobacteria	Gammaproteobacteria	Pasteurellales	Pasteurellaceae	Gallibacterium	Gallibacterium genomosp.	2	0	0	0	0	0	0	0	1	0	0	0	0	0	0	0	0	0	0	0	0	0	0	0	0	0	1	0	0	0	0	0	0	0	0	0	0	0	0	0	0
Root	Bacteria	Proteobacteria	Gammaproteobacteria	Pseudomonadales	Pseudomonadaceae	Pseudomonas	Pseudomonas alcaligenes	2	0	0	0	0	0	0	0	0	0	0	0	0	0	0	0	0	0	0	0	0	0	0	0	0	0	0	0	0	0	1	1	0	0	0	0	0	0	0	0	0
Root	Bacteria	Proteobacteria	Gammaproteobacteria	Vibrionales	Vibrionaceae	Salinivibrio	Salinivibrio costicola	2	0	0	0	0	0	0	0	0	0	0	0	0	0	0	0	0	0	0	0	0	0	0	0	0	0	0	1	1	0	0	0	0	0	0	0	0	0	0	0	0
Root	Bacteria	TM7	TM7_c	TM7_o	TM7_f	TM7_g	TM7_sp	2	0	0	0	0	0	0	0	0	0	0	0	0	0	0	0	0	0	0	1	1	0	0	0	0	0	0	0	0	0	0	0	0	0	0	0	0	0	0	0	0
Root	Bacteria	TM7	TM7-3	I025	Rs-045	Rs-045_g	Rs-045_sp	2	0	0	0	0	0	0	0	0	0	0	0	0	0	0	0	0	0	0	0	0	0	0	0	0	0	0	0	0	0	0	0	0	0	0	0	0	2	0	0	0
Root	Bacteria	Tenericutes	Mollicutes	Anaeroplasmatales	Anaeroplasmataceae	gut	gut metagenome	2	0	0	0	0	0	0	0	0	0	0	0	0	0	0	0	0	0	0	0	0	0	0	0	1	0	0	0	0	0	1	0	0	0	0	0	0	0	0	0	0
Root	Bacteria	Verrucomicrobia	Opitutae	Opitutales	Opitutaceae	Opitutus	Opitutus_sp	2	0	0	0	0	0	0	0	0	0	0	0	0	0	0	0	0	0	0	0	0	0	0	0	0	0	0	1	1	0	0	0	0	0	0	0	0	0	0	0	0
Root	Bacteria	Verrucomicrobia	Spartobacteria	Chthoniobacterales	Chthoniobacteraceae	Ellin506	Ellin506_sp	2	0	0	0	1	0	0	0	0	0	0	0	0	0	0	0	0	0	0	0	0	0	0	0	0	0	0	0	0	0	1	0	0	0	0	0	0	0	0	0	0
Root	Bacteria	WPS-2	WPS-2_c	WPS-2_o	WPS-2_f	WPS-2_g	WPS-2_sp	2	0	0	0	0	0	0	0	0	0	0	0	0	0	0	1	0	0	0	0	0	0	0	1	0	0	0	0	0	0	0	0	0	0	0	0	0	0	0	0	0
Root	Archaea	Euryarchaeota	Thermoplasmata	E2	Methanomassiliicoccaceae	vadinCA11	vadinCA11_sp	1	0	0	0	0	0	0	0	0	0	0	0	0	0	0	0	0	0	0	0	0	0	0	1	0	0	0	0	0	0	0	0	0	0	0	0	0	0	0	0	0
Root	Bacteria	Acidobacteria	Acidobacteria-6	iii1-15	mb2424	mb2424_g	mb2424_sp	1	0	0	0	0	0	0	0	0	0	0	0	0	0	0	0	0	0	0	0	0	0	0	1	0	0	0	0	0	0	0	0	0	0	0	0	0	0	0	0	0
Root	Bacteria	Acidobacteria	Chloracidobacteria	Chloracidobacteria_o	Chloracidobacteria_f	Chloracidobacteria_g	Chloracidobacteria_sp	1	0	0	0	0	0	0	0	0	0	1	0	0	0	0	0	0	0	0	0	0	0	0	0	0	0	0	0	0	0	0	0	0	0	0	0	0	0	0	0	0
Root	Bacteria	Actinobacteria	Acidimicrobiia	Acidimicrobiales	JdFBGBact	JdFBGBact_g	JdFBGBact_sp	1	0	0	0	1	0	0	0	0	0	0	0	0	0	0	0	0	0	0	0	0	0	0	0	0	0	0	0	0	0	0	0	0	0	0	0	0	0	0	0	0
Root	Bacteria	Actinobacteria	Acidimicrobiia	Acidimicrobiales	TK06	TK06_g	TK06_sp	1	0	0	0	0	0	0	0	0	0	0	0	1	0	0	0	0	0	0	0	0	0	0	0	0	0	0	0	0	0	0	0	0	0	0	0	0	0	0	0	0
Root	Bacteria	Actinobacteria	Actinobacteria(class)	Actinomycetales	Actinomycetaceae	Actinobaculum	Actinobaculum_sp	1	0	0	0	0	0	0	0	0	1	0	0	0	0	0	0	0	0	0	0	0	0	0	0	0	0	0	0	0	0	0	0	0	0	0	0	0	0	0	0	0
Root	Bacteria	Actinobacteria	Actinobacteria(class)	Actinomycetales	Actinomycetaceae	Varibaculum	Varibaculum_sp	1	0	0	0	0	1	0	0	0	0	0	0	0	0	0	0	0	0	0	0	0	0	0	0	0	0	0	0	0	0	0	0	0	0	0	0	0	0	0	0	0
Root	Bacteria	Actinobacteria	Actinobacteria(class)	Actinomycetales	Brevibacteriaceae	Brevibacterium	Brevibacterium_sp	1	0	0	0	0	0	0	0	0	0	0	0	0	0	0	0	0	0	0	0	0	0	0	0	0	0	0	0	0	0	0	0	0	1	0	0	0	0	0	0	0
Root	Bacteria	Actinobacteria	Actinobacteria(class)	Actinomycetales	Cellulomonadaceae	Cellulomonadaceae_g	Cellulomonadaceae_sp	1	0	0	0	0	1	0	0	0	0	0	0	0	0	0	0	0	0	0	0	0	0	0	0	0	0	0	0	0	0	0	0	0	0	0	0	0	0	0	0	0
Root	Bacteria	Actinobacteria	Actinobacteria(class)	Actinomycetales	Cellulomonadaceae	Demequina	Demequina_sp	1	0	0	0	0	0	0	0	0	0	0	0	0	0	0	0	0	0	0	0	0	0	0	0	0	0	0	0	0	0	0	0	0	0	1	0	0	0	0	0	0
Root	Bacteria	Actinobacteria	Actinobacteria(class)	Actinomycetales	Dermacoccaceae	Dermacoccus	Dermacoccus_sp	1	1	0	0	0	0	0	0	0	0	0	0	0	0	0	0	0	0	0	0	0	0	0	0	0	0	0	0	0	0	0	0	0	0	0	0	0	0	0	0	0
Root	Bacteria	Actinobacteria	Actinobacteria(class)	Actinomycetales	Microbacteriaceae	Leucobacter	Leucobacter_sp	1	0	0	0	0	0	0	0	0	0	0	0	0	0	0	0	0	0	0	0	0	0	0	0	0	0	0	0	0	0	0	1	0	0	0	0	0	0	0	0	0
Root	Bacteria	Actinobacteria	Actinobacteria(class)	Actinomycetales	Micrococcaceae	Arthrobacter	Arthrobacter_sp	1	0	0	0	0	0	0	0	0	0	1	0	0	0	0	0	0	0	0	0	0	0	0	0	0	0	0	0	0	0	0	0	0	0	0	0	0	0	0	0	0
Root	Bacteria	Actinobacteria	Actinobacteria(class)	Actinomycetales	Micrococcaceae	Kocuria	Kocuria palustris	1	0	0	0	0	0	0	0	0	0	0	0	0	0	0	0	0	0	0	0	0	0	0	0	0	0	0	0	0	0	0	0	0	1	0	0	0	0	0	0	0
Root	Bacteria	Actinobacteria	Actinobacteria(class)	Actinomycetales	Mycobacteriaceae	Mycobacterium	Mycobacterium_sp	1	0	0	0	0	0	0	0	0	0	0	0	0	1	0	0	0	0	0	0	0	0	0	0	0	0	0	0	0	0	0	0	0	0	0	0	0	0	0	0	0
Root	Bacteria	Actinobacteria	Actinobacteria(class)	Actinomycetales	Nocardiaceae	Rhodococcus	Rhodococcus equi	1	0	0	0	0	0	0	0	0	0	0	0	0	0	0	0	0	0	0	0	0	0	0	0	0	0	0	0	0	0	0	0	0	0	0	0	0	0	0	0	1
Root	Bacteria	Actinobacteria	Actinobacteria(class)	Actinomycetales	Sanguibacteraceae	Sanguibacter	Sanguibacter_sp	1	0	0	0	0	0	0	0	0	0	0	0	0	0	0	0	0	0	0	1	0	0	0	0	0	0	0	0	0	0	0	0	0	0	0	0	0	0	0	0	0
Root	Bacteria	Actinobacteria	Actinobacteria(class)	Actinomycetales	Streptomycetaceae	Streptomycetaceae_g	Streptomycetaceae_sp	1	0	0	0	0	0	0	0	0	0	0	0	0	0	0	0	0	0	0	0	0	0	0	0	0	0	0	0	0	0	0	0	0	0	0	0	0	1	0	0	0
Root	Bacteria	Actinobacteria	Actinobacteria(class)	Bifidobacteriales	Bifidobacteriaceae	Scardovia	Scardovia_sp	1	0	0	0	0	0	0	0	0	1	0	0	0	0	0	0	0	0	0	0	0	0	0	0	0	0	0	0	0	0	0	0	0	0	0	0	0	0	0	0	0
Root	Bacteria	Actinobacteria	Coriobacteriia	Coriobacteriales	Coriobacteriaceae	Atopobium	Atopobium rimae	1	0	1	0	0	0	0	0	0	0	0	0	0	0	0	0	0	0	0	0	0	0	0	0	0	0	0	0	0	0	0	0	0	0	0	0	0	0	0	0	0
Root	Bacteria	Actinobacteria	Coriobacteriia	Coriobacteriales	Coriobacteriaceae	Enterococcus	Enterococcus casseliflavus	1	0	0	0	0	0	0	1	0	0	0	0	0	0	0	0	0	0	0	0	0	0	0	0	0	0	0	0	0	0	0	0	0	0	0	0	0	0	0	0	0
Root	Bacteria	Actinobacteria	Thermoleophilia	Solirubrobacterales	Conexibacteraceae	Conexibacteraceae_g	Conexibacteraceae_sp	1	0	0	0	0	0	0	0	0	0	0	0	0	0	0	0	0	0	0	0	0	0	0	0	0	0	0	0	0	0	0	0	1	0	0	0	0	0	0	0	0
Root	Bacteria	Actinobacteria	Thermoleophilia	Solirubrobacterales	Patulibacteraceae	Patulibacteraceae_g	Patulibacteraceae_sp	1	0	0	0	0	0	0	0	0	0	0	0	0	0	0	0	0	0	0	0	0	0	0	0	0	0	0	0	0	1	0	0	0	0	0	0	0	0	0	0	0
Root	Bacteria	Bacteroidetes	Bacteroidia	Bacteroidales	GZKB119	GZKB119_g	GZKB119_sp	1	0	0	0	0	0	0	0	0	0	0	0	0	0	0	0	0	0	0	0	0	0	0	0	0	0	0	0	0	0	0	0	0	1	0	0	0	0	0	0	0
Root	Bacteria	Bacteroidetes	Cytophagia	Cytophagales	Cyclobacteriaceae	Nitritalea	Nitritalea halalkaliphila	1	0	0	0	0	1	0	0	0	0	0	0	0	0	0	0	0	0	0	0	0	0	0	0	0	0	0	0	0	0	0	0	0	0	0	0	0	0	0	0	0
Root	Bacteria	Bacteroidetes	Cytophagia	Cytophagales	Cytophagaceae	Pontibacter	Pontibacter_sp	1	0	0	0	0	0	0	0	0	0	0	0	0	0	0	0	0	0	0	0	0	0	0	0	0	0	0	0	0	0	0	0	1	0	0	0	0	0	0	0	0
Root	Bacteria	Bacteroidetes	Cytophagia	Cytophagales	Flammeovirgaceae	Flexibacter	Flexibacter_sp	1	0	0	0	0	0	0	0	0	0	0	0	0	1	0	0	0	0	0	0	0	0	0	0	0	0	0	0	0	0	0	0	0	0	0	0	0	0	0	0	0
Root	Bacteria	Bacteroidetes	Flavobacteriia	Flavobacteriales	Flavobacteriaceae	Wautersiella	Wautersiella_sp	1	0	0	0	0	0	0	0	0	0	0	0	0	0	0	0	0	0	0	0	0	0	0	0	0	0	0	1	0	0	0	0	0	0	0	0	0	0	0	0	0
Root	Bacteria	Bacteroidetes	Saprospirae	Saprospirales	Chitinophagaceae	Chitinophaga	Chitinophaga_sp	1	0	0	0	0	0	0	0	0	0	0	0	0	0	0	0	0	0	0	0	0	0	0	0	0	0	0	0	0	1	0	0	0	0	0	0	0	0	0	0	0
Root	Bacteria	Chlorobi	Chlorobia	Chlorobiales	Chlorobiaceae	Prosthecochloris	Prosthecochloris_sp	1	0	0	0	0	0	0	0	0	0	0	0	0	0	0	0	0	0	0	0	0	0	0	1	0	0	0	0	0	0	0	0	0	0	0	0	0	0	0	0	0
Root	Bacteria	Chlorobi	Ignavibacteria	Ignavibacteriales	Ignavibacteriaceae	Ignavibacteriaceae_g	Ignavibacteriaceae_sp	1	0	0	0	0	0	0	0	0	0	0	0	0	0	0	0	0	0	0	1	0	0	0	0	0	0	0	0	0	0	0	0	0	0	0	0	0	0	0	0	0
Root	Bacteria	Chloroflexi	Anaerolineae	Caldilineales	Caldilineaceae	Litorilinea	Litorilinea aerophila	1	0	0	0	0	0	0	0	0	0	0	0	0	0	0	0	0	0	0	0	1	0	0	0	0	0	0	0	0	0	0	0	0	0	0	0	0	0	0	0	0
Root	Bacteria	Chloroflexi	Thermobacula	Thermobaculales	Thermobaculaceae	Thermobaculum	Thermobaculum terrenum	1	0	0	0	0	0	0	0	0	0	0	0	0	0	0	0	0	0	0	1	0	0	0	0	0	0	0	0	0	0	0	0	0	0	0	0	0	0	0	0	0
Root	Bacteria	Cyanobacteria	Chloroplast	Chloroplast_o	Chloroplast_f	Chloroplast_g	Chloroplast_sp	1	0	0	0	0	0	0	0	0	0	0	0	0	0	0	0	1	0	0	0	0	0	0	0	0	0	0	0	0	0	0	0	0	0	0	0	0	0	0	0	0
Root	Bacteria	Cyanobacteria	Chloroplast	Haptophyceae	Haptophyceae_f	Haptophyceae_g	Haptophyceae_sp	1	0	0	0	0	0	0	0	0	0	0	0	0	0	0	0	0	0	1	0	0	0	0	0	0	0	0	0	0	0	0	0	0	0	0	0	0	0	0	0	0
Root	Bacteria	Cyanobacteria	Oscillatoriophycideae	Chroococcales	Chroococcales_f	Chroococcales_g	Chroococcales_sp	1	0	0	1	0	0	0	0	0	0	0	0	0	0	0	0	0	0	0	0	0	0	0	0	0	0	0	0	0	0	0	0	0	0	0	0	0	0	0	0	0
Root	Bacteria	Cyanobacteria	Synechococcophycideae	Pseudanabaenales	Pseudanabaenaceae	Pseudanabaena	Pseudanabaena_sp	1	0	0	0	0	0	0	0	0	0	0	0	1	0	0	0	0	0	0	0	0	0	0	0	0	0	0	0	0	0	0	0	0	0	0	0	0	0	0	0	0
Root	Bacteria	Cyanobacteria	Synechococcophycideae	Pseudanabaenales	Pseudanabaenaceae	Synechococcus	Synechococcus elongatus	1	0	0	0	0	0	0	0	0	0	0	0	0	0	0	0	0	0	0	0	0	0	0	1	0	0	0	0	0	0	0	0	0	0	0	0	0	0	0	0	0
Root	Bacteria	Dictyoglomi	Dictyoglomia	Dictyoglomales	Dictyoglomaceae	Dictyoglomus	Dictyoglomus_sp	1	0	0	0	0	0	0	0	1	0	0	0	0	0	0	0	0	0	0	0	0	0	0	0	0	0	0	0	0	0	0	0	0	0	0	0	0	0	0	0	0
Root	Bacteria	Firmicutes	Bacilli	Bacillales	Alicyclobacillaceae	Alicyclobacillaceae_g	Alicyclobacillaceae_sp	1	0	0	0	0	0	0	0	0	0	0	0	0	0	0	0	0	0	0	0	0	0	0	0	0	0	0	0	0	0	0	0	0	1	0	0	0	0	0	0	0
Root	Bacteria	Firmicutes	Bacilli	Bacillales	Alicyclobacillaceae	Alicyclobacillus	Alicyclobacillus pomorum	1	0	0	0	0	0	0	0	0	1	0	0	0	0	0	0	0	0	0	0	0	0	0	0	0	0	0	0	0	0	0	0	0	0	0	0	0	0	0	0	0
Root	Bacteria	Firmicutes	Bacilli	Bacillales	Planococcaceae	Kurthia	Kurthia_sp	1	0	0	0	0	0	0	0	0	0	0	0	0	0	0	0	0	0	0	0	0	0	0	0	0	0	0	0	0	0	0	0	0	1	0	0	0	0	0	0	0
Root	Bacteria	Firmicutes	Bacilli	Bacillales	Planococcaceae	Lysinibacillus	Lysinibacillus boronitolerans	1	0	0	0	0	0	0	0	0	0	0	0	0	0	0	0	0	0	0	0	0	0	0	0	0	0	0	0	0	0	0	0	1	0	0	0	0	0	0	0	0
Root	Bacteria	Firmicutes	Bacilli	Bacillales	Planococcaceae	Sporosarcina	Sporosarcina_sp	1	0	0	0	0	0	0	0	0	0	0	0	0	0	0	0	0	0	0	0	0	0	0	0	0	0	0	0	0	0	0	0	1	0	0	0	0	0	0	0	0
Root	Bacteria	Firmicutes	Bacilli	Bacillales	Staphylococcaceae	Salinicoccus	Salinicoccus_sp	1	0	0	0	0	0	0	0	0	0	0	0	0	0	0	0	0	0	0	0	0	0	0	0	0	0	0	1	0	0	0	0	0	0	0	0	0	0	0	0	0
Root	Bacteria	Firmicutes	Bacilli	Bacillales	Thermoactinomycetaceae	Thermoactinomycetaceae_g	Thermoactinomycetaceae_sp	1	0	0	1	0	0	0	0	0	0	0	0	0	0	0	0	0	0	0	0	0	0	0	0	0	0	0	0	0	0	0	0	0	0	0	0	0	0	0	0	0
Root	Bacteria	Firmicutes	Bacilli	Bacillales	Bacillales Family XII. Incertae Sedis	Exiguobacterium	Exiguobacterium_sp	1	0	0	0	0	0	0	0	0	0	0	0	0	0	1	0	0	0	0	0	0	0	0	0	0	0	0	0	0	0	0	0	0	0	0	0	0	0	0	0	0
Root	Bacteria	Firmicutes	Bacilli	Lactobacillales	Aerococcaceae	Abiotrophia	Abiotrophia_sp	1	0	0	0	0	0	0	0	0	0	0	0	0	0	0	0	0	0	0	0	0	0	0	0	0	0	0	0	1	0	0	0	0	0	0	0	0	0	0	0	0
Root	Bacteria	Firmicutes	Bacilli	Lactobacillales	Enterococcaceae	Enterococcus	Enterococcus cecorum	1	0	0	0	0	0	0	0	0	0	0	0	0	0	0	0	0	0	0	0	0	0	0	0	0	0	0	1	0	0	0	0	0	0	0	0	0	0	0	0	0
Root	Bacteria	Firmicutes	Bacilli	Lactobacillales	Lactobacillaceae	Lactobacillus	Lactobacillus vaginalis	1	0	0	0	0	0	0	0	0	0	0	0	0	0	0	0	0	0	0	0	0	1	0	0	0	0	0	0	0	0	0	0	0	0	0	0	0	0	0	0	0
Root	Bacteria	Firmicutes	Bacilli	Lactobacillales	Streptococcaceae	Streptococcus	Streptococcus sobrinus	1	0	0	0	0	0	0	0	0	0	0	0	0	0	0	0	0	0	0	0	0	0	0	0	0	0	0	0	0	0	0	0	0	0	0	0	0	0	0	1	0
Root	Bacteria	Firmicutes	Clostridia	Clostridiales	Clostridiaceae	Caloranaerobacter	Caloranaerobacter_sp	1	0	0	0	0	0	0	0	0	0	0	0	0	0	0	0	0	0	0	0	0	0	0	0	0	0	0	0	1	0	0	0	0	0	0	0	0	0	0	0	0
Root	Bacteria	Firmicutes	Clostridia	Clostridiales	Clostridiaceae	Clostridiisalibacter	Clostridiisalibacter_sp	1	0	0	0	0	0	0	0	0	0	0	0	0	0	0	0	0	0	0	0	0	0	0	0	0	0	0	0	1	0	0	0	0	0	0	0	0	0	0	0	0
Root	Bacteria	Firmicutes	Clostridia	Clostridiales	Clostridiaceae	Clostridium	Clostridium cellulovorans	1	1	0	0	0	0	0	0	0	0	0	0	0	0	0	0	0	0	0	0	0	0	0	0	0	0	0	0	0	0	0	0	0	0	0	0	0	0	0	0	0
Root	Bacteria	Firmicutes	Clostridia	Clostridiales	Clostridiaceae	Clostridium	Clostridium neonatale	1	0	0	0	0	0	1	0	0	0	0	0	0	0	0	0	0	0	0	0	0	0	0	0	0	0	0	0	0	0	0	0	0	0	0	0	0	0	0	0	0
Root	Bacteria	Firmicutes	Clostridia	Clostridiales	Clostridiaceae	Clostridium	Clostridium sardiniense	1	0	0	0	0	0	0	0	0	0	0	0	0	0	0	0	0	0	0	0	0	0	0	0	0	0	0	1	0	0	0	0	0	0	0	0	0	0	0	0	0
Root	Bacteria	Firmicutes	Clostridia	Clostridiales	Clostridiaceae	Natronincola_Anaerovirgula	Natronincola_Anaerovirgula_sp	1	0	0	0	0	0	0	0	0	0	0	0	0	0	0	0	0	0	0	0	0	0	0	0	0	0	0	0	0	0	0	0	0	0	0	0	0	0	0	1	0
Root	Bacteria	Firmicutes	Clostridia	Clostridiales	Clostridiaceae	Oxobacter	Oxobacter_sp	1	0	0	0	0	0	0	0	0	0	0	0	0	0	0	0	0	0	0	0	0	0	0	1	0	0	0	0	0	0	0	0	0	0	0	0	0	0	0	0	0
Root	Bacteria	Firmicutes	Clostridia	Clostridiales	Clostridiaceae	Proteiniborus	Proteiniborus ethanoligenes	1	0	0	0	0	0	0	0	0	0	0	0	0	0	0	0	0	0	0	0	0	0	0	0	0	0	0	0	0	0	0	0	1	0	0	0	0	0	0	0	0
Root	Bacteria	Firmicutes	Clostridia	Clostridiales	Clostridiaceae	Proteiniclasticum	Proteiniclasticum_sp	1	0	0	0	0	0	1	0	0	0	0	0	0	0	0	0	0	0	0	0	0	0	0	0	0	0	0	0	0	0	0	0	0	0	0	0	0	0	0	0	0
Root	Bacteria	Firmicutes	Clostridia	Clostridiales	Clostridiaceae	Tindallia_Anoxynatronum	Tindallia_Anoxynatronum_sp	1	0	0	0	0	0	0	0	0	0	0	0	0	0	0	0	0	0	0	0	0	0	0	0	1	0	0	0	0	0	0	0	0	0	0	0	0	0	0	0	0
Root	Bacteria	Firmicutes	Clostridia	Clostridiales	Eubacteriaceae	Garciella	Garciella_sp	1	0	0	0	0	0	0	0	0	0	0	0	0	0	0	0	0	0	0	0	0	0	0	0	0	0	0	0	0	1	0	0	0	0	0	0	0	0	0	0	0
Root	Bacteria	Firmicutes	Clostridia	Clostridiales	Gracilibacteraceae	Lutispora	Lutispora_sp	1	0	0	1	0	0	0	0	0	0	0	0	0	0	0	0	0	0	0	0	0	0	0	0	0	0	0	0	0	0	0	0	0	0	0	0	0	0	0	0	0
Root	Bacteria	Firmicutes	Clostridia	Clostridiales	JTB215	JTB215_g	JTB215_sp	1	0	0	0	0	0	0	0	1	0	0	0	0	0	0	0	0	0	0	0	0	0	0	0	0	0	0	0	0	0	0	0	0	0	0	0	0	0	0	0	0
Root	Bacteria	Firmicutes	Clostridia	Clostridiales	Lachnospiraceae	Ruminococcus	Ruminococcus gauvreauii	1	0	0	0	0	0	0	0	1	0	0	0	0	0	0	0	0	0	0	0	0	0	0	0	0	0	0	0	0	0	0	0	0	0	0	0	0	0	0	0	0
Root	Bacteria	Firmicutes	Clostridia	Clostridiales	Peptococcaceae	Desulfurispora	Desulfurispora_sp	1	0	0	0	0	0	0	0	0	0	0	0	0	0	0	0	0	0	0	0	0	0	0	0	0	0	0	0	0	0	0	0	0	0	1	0	0	0	0	0	0
Root	Bacteria	Firmicutes	Clostridia	Clostridiales	Peptococcaceae	Pelotomaculum	Pelotomaculum_sp	1	0	0	0	0	0	0	0	0	1	0	0	0	0	0	0	0	0	0	0	0	0	0	0	0	0	0	0	0	0	0	0	0	0	0	0	0	0	0	0	0
Root	Bacteria	Firmicutes	Clostridia	Clostridiales	Ruminococcaceae	Butyricicoccus	Butyricicoccus pullicaecorum	1	0	0	0	0	0	0	0	0	0	0	0	0	0	0	0	0	0	0	0	0	0	0	0	0	0	0	0	0	0	0	0	0	0	0	0	0	1	0	0	0
Root	Bacteria	Firmicutes	Clostridia	Clostridiales	Ruminococcaceae	Cellulosibacter	Cellulosibacter alkalithermophilus	1	0	0	0	0	0	0	0	0	0	0	0	0	0	1	0	0	0	0	0	0	0	0	0	0	0	0	0	0	0	0	0	0	0	0	0	0	0	0	0	0
Root	Bacteria	Firmicutes	Clostridia	Clostridiales	Ruminococcaceae	Clostridium	Clostridium hungatei	1	0	0	0	0	0	0	0	0	0	0	0	0	0	0	0	0	0	0	0	0	0	0	0	0	0	0	1	0	0	0	0	0	0	0	0	0	0	0	0	0
Root	Bacteria	Firmicutes	Clostridia	Clostridiales	Syntrophomonadaceae	Syntrophomonas	Syntrophomonas_sp	1	0	0	0	0	0	0	0	0	0	0	0	0	0	0	0	0	0	0	0	0	0	0	0	0	0	0	0	0	0	0	0	0	0	0	0	0	0	0	0	1
Root	Bacteria	Firmicutes	Negativicutes	Selenomonadales	Sporomusaceae	Acetonema	Acetonema longum	1	0	0	0	0	0	0	0	1	0	0	0	0	0	0	0	0	0	0	0	0	0	0	0	0	0	0	0	0	0	0	0	0	0	0	0	0	0	0	0	0
Root	Bacteria	Firmicutes	Negativicutes	Selenomonadales	Sporomusaceae	Propionispora	Propionispora_sp	1	0	0	0	0	0	0	0	0	0	0	0	0	0	0	0	0	0	0	0	0	0	0	0	0	0	0	0	0	0	0	0	0	0	0	0	1	0	0	0	0
Root	Bacteria	Firmicutes	Negativicutes	Selenomonadales	Selenomonadaceae	Selenomonas	Selenomonas noxia	1	0	0	0	0	1	0	0	0	0	0	0	0	0	0	0	0	0	0	0	0	0	0	0	0	0	0	0	0	0	0	0	0	0	0	0	0	0	0	0	0
Root	Bacteria	Firmicutes	Clostridia	Clostridiales	Tissierellaceae	Dethiosulfatibacter	Dethiosulfatibacter_sp	1	0	0	0	0	0	0	0	0	0	0	0	0	0	0	0	0	0	0	0	0	0	0	0	0	0	0	0	0	0	0	1	0	0	0	0	0	0	0	0	0
Root	Bacteria	Firmicutes	Clostridia	Clostridiales	Tissierellaceae	Tepidimicrobium	Tepidimicrobium_sp	1	0	0	0	0	0	0	0	0	0	0	0	0	0	0	0	0	0	0	0	0	0	0	0	0	0	0	0	0	0	0	0	0	1	0	0	0	0	0	0	0
Root	Bacteria	Firmicutes	Clostridia	Halanaerobiales	Halanaerobiaceae	Halanaerobium	Halanaerobium hydrogeniformans	1	0	0	0	0	0	0	0	0	0	0	0	0	0	0	0	0	0	0	0	0	0	0	0	1	0	0	0	0	0	0	0	0	0	0	0	0	0	0	0	0
Root	Bacteria	Firmicutes	Clostridia	MBA08	MBA08_f	MBA08_g	MBA08_sp	1	0	0	0	0	0	0	0	0	0	0	0	0	0	0	0	0	0	0	0	0	0	0	0	0	0	0	0	0	0	1	0	0	0	0	0	0	0	0	0	0
Root	Bacteria	Firmicutes	Clostridia	OPB54	OPB54_f	OPB54_g	OPB54_sp	1	0	0	0	0	0	0	0	0	0	0	0	0	0	0	0	1	0	0	0	0	0	0	0	0	0	0	0	0	0	0	0	0	0	0	0	0	0	0	0	0
Root	Bacteria	Firmicutes	Clostridia	Thermoanaerobacterales	Thermoanaerobacterales Family III. Incertae Sedis	Caldicellulosiruptor	Caldicellulosiruptor saccharolyticus	1	0	0	0	0	0	0	0	0	0	0	0	0	0	0	0	0	0	0	0	0	0	0	0	0	0	0	0	0	0	0	1	0	0	0	0	0	0	0	0	0
Root	Bacteria	Firmicutes	Clostridia	Thermoanaerobacterales	Thermoanaerobacteraceae	Moorella	Moorella_sp	1	0	0	0	0	0	0	0	0	0	0	0	0	0	0	0	0	0	0	0	1	0	0	0	0	0	0	0	0	0	0	0	0	0	0	0	0	0	0	0	0
Root	Bacteria	Firmicutes	Erysipelotrichia	Erysipelotrichales	Erysipelotrichaceae	L7A_E11	L7A_E11_sp	1	0	0	0	0	0	0	1	0	0	0	0	0	0	0	0	0	0	0	0	0	0	0	0	0	0	0	0	0	0	0	0	0	0	0	0	0	0	0	0	0
Root	Bacteria	OP8	OP8_2	OP8_2_o	OP8_2_f	OP8_2_g	OP8_2_sp	1	0	0	0	0	0	0	0	1	0	0	0	0	0	0	0	0	0	0	0	0	0	0	0	0	0	0	0	0	0	0	0	0	0	0	0	0	0	0	0	0
Root	Bacteria	Proteobacteria	Proteobacteria_c	Proteobacteria_o	Proteobacteria_f	Proteobacteria_g	Proteobacteria_sp	1	0	0	0	0	0	0	0	0	0	0	0	0	0	0	0	0	0	0	0	0	0	0	0	0	0	1	0	0	0	0	0	0	0	0	0	0	0	0	0	0
Root	Bacteria	Proteobacteria	Alphaproteobacteria	Caulobacterales	Caulobacteraceae	Caulobacteraceae_g	Caulobacteraceae_sp	1	0	0	0	1	0	0	0	0	0	0	0	0	0	0	0	0	0	0	0	0	0	0	0	0	0	0	0	0	0	0	0	0	0	0	0	0	0	0	0	0
Root	Bacteria	Proteobacteria	Alphaproteobacteria	Rhizobiales	Rhizobiales_f	Rhizobiales_g	Rhizobiales_sp	1	0	0	0	0	0	0	0	1	0	0	0	0	0	0	0	0	0	0	0	0	0	0	0	0	0	0	0	0	0	0	0	0	0	0	0	0	0	0	0	0
Root	Bacteria	Proteobacteria	Alphaproteobacteria	Rhodospirillales	Rhodospirillaceae	Azospirillum	Azospirillum_sp	1	0	0	0	0	0	0	0	0	0	0	0	0	0	0	0	0	0	0	0	0	0	0	0	1	0	0	0	0	0	0	0	0	0	0	0	0	0	0	0	0
Root	Bacteria	Proteobacteria	Alphaproteobacteria	Rhodospirillales	Rhodospirillaceae	Rhodospirillum	Rhodospirillum rubrum	1	0	0	0	0	0	0	0	0	0	0	0	1	0	0	0	0	0	0	0	0	0	0	0	0	0	0	0	0	0	0	0	0	0	0	0	0	0	0	0	0
Root	Bacteria	Proteobacteria	Alphaproteobacteria	Rickettsiales	Rickettsiales_f	Rickettsiales_g	Rickettsiales_sp	1	0	0	1	0	0	0	0	0	0	0	0	0	0	0	0	0	0	0	0	0	0	0	0	0	0	0	0	0	0	0	0	0	0	0	0	0	0	0	0	0
Root	Bacteria	Proteobacteria	Alphaproteobacteria	Rickettsiales	mitochondria	Citrullus	Citrullus lanatus	1	0	0	0	0	0	0	0	0	0	0	0	0	0	0	0	0	0	0	0	0	0	0	0	0	0	0	0	0	0	0	0	0	0	1	0	0	0	0	0	0
Root	Bacteria	Proteobacteria	Alphaproteobacteria	Rickettsiales	mitochondria	Victoria	Victoria amazonica	1	0	0	0	0	0	0	0	0	0	0	0	0	0	0	0	0	0	0	0	0	0	0	0	0	0	0	0	0	0	0	0	0	0	1	0	0	0	0	0	0
Root	Bacteria	Proteobacteria	Alphaproteobacteria	Rickettsiales	mitochondria	Zamia	Zamia integrifolia	1	0	0	0	0	0	0	0	0	0	0	0	0	0	0	0	0	0	0	0	0	0	0	0	0	0	0	0	0	0	0	0	0	0	0	0	0	0	1	0	0
Root	Bacteria	Proteobacteria	Betaproteobacteria	Burkholderiales	Alcaligenaceae	Alcaligenes	Alcaligenes faecalis	1	0	0	0	0	0	0	0	1	0	0	0	0	0	0	0	0	0	0	0	0	0	0	0	0	0	0	0	0	0	0	0	0	0	0	0	0	0	0	0	0
Root	Bacteria	Proteobacteria	Betaproteobacteria	Burkholderiales	Alcaligenaceae	Pigmentiphaga	Pigmentiphaga_sp	1	0	0	0	0	0	0	0	0	0	0	0	0	0	0	0	0	0	0	0	0	0	0	0	1	0	0	0	0	0	0	0	0	0	0	0	0	0	0	0	0
Root	Bacteria	Proteobacteria	Betaproteobacteria	Burkholderiales	Burkholderiaceae	Salinispora	Salinispora_sp	1	0	0	0	0	0	0	0	0	1	0	0	0	0	0	0	0	0	0	0	0	0	0	0	0	0	0	0	0	0	0	0	0	0	0	0	0	0	0	0	0
Root	Bacteria	Proteobacteria	Betaproteobacteria	Burkholderiales	Burkholderiaceae	Salinispora	Salinispora tropica	1	0	0	0	0	0	0	0	0	0	0	0	0	0	0	0	0	0	0	0	0	1	0	0	0	0	0	0	0	0	0	0	0	0	0	0	0	0	0	0	0
Root	Bacteria	Proteobacteria	Betaproteobacteria	Burkholderiales	Comamonadaceae	Rubrivivax	Rubrivivax_sp	1	0	0	0	0	0	0	0	0	0	1	0	0	0	0	0	0	0	0	0	0	0	0	0	0	0	0	0	0	0	0	0	0	0	0	0	0	0	0	0	0
Root	Bacteria	Proteobacteria	Betaproteobacteria	Burkholderiales	Comamonadaceae	Schlegelella	Schlegelella_sp	1	0	0	0	0	0	0	0	0	0	0	0	1	0	0	0	0	0	0	0	0	0	0	0	0	0	0	0	0	0	0	0	0	0	0	0	0	0	0	0	0
Root	Bacteria	Proteobacteria	Betaproteobacteria	Burkholderiales	Comamonadaceae	Variovorax	Variovorax paradoxus	1	0	0	0	0	0	0	0	0	0	0	0	1	0	0	0	0	0	0	0	0	0	0	0	0	0	0	0	0	0	0	0	0	0	0	0	0	0	0	0	0
Root	Bacteria	Proteobacteria	Betaproteobacteria	Burkholderiales	Oxalobacteraceae	Collimonas	Collimonas_sp	1	0	0	0	0	0	0	0	0	0	0	0	0	0	0	0	0	0	0	0	0	0	1	0	0	0	0	0	0	0	0	0	0	0	0	0	0	0	0	0	0
Root	Bacteria	Proteobacteria	Betaproteobacteria	Burkholderiales	Oxalobacteraceae	Herminiimonas	Herminiimonas_sp	1	0	0	0	0	0	0	1	0	0	0	0	0	0	0	0	0	0	0	0	0	0	0	0	0	0	0	0	0	0	0	0	0	0	0	0	0	0	0	0	0
Root	Bacteria	Proteobacteria	Betaproteobacteria	Gallionellales	Gallionellaceae	Gallionella	Gallionella_sp	1	0	0	0	0	0	0	0	0	0	0	0	0	0	0	0	0	0	0	0	0	0	0	0	0	0	0	0	0	0	0	0	0	0	0	0	0	1	0	0	0
Root	Bacteria	Proteobacteria	Betaproteobacteria	Neisseriales	Neisseriaceae	Microvirgula	Microvirgula_sp	1	0	0	0	0	0	0	0	1	0	0	0	0	0	0	0	0	0	0	0	0	0	0	0	0	0	0	0	0	0	0	0	0	0	0	0	0	0	0	0	0
Root	Bacteria	Proteobacteria	Betaproteobacteria	Neisseriales	Neisseriaceae	Neisseria	Neisseria cinerea	1	0	0	0	0	0	0	0	1	0	0	0	0	0	0	0	0	0	0	0	0	0	0	0	0	0	0	0	0	0	0	0	0	0	0	0	0	0	0	0	0
Root	Bacteria	Proteobacteria	Betaproteobacteria	Nitrosomonadales	Nitrosomonadales_f	Nitrosomonadales_g	Nitrosomonadales_sp	1	0	0	0	0	1	0	0	0	0	0	0	0	0	0	0	0	0	0	0	0	0	0	0	0	0	0	0	0	0	0	0	0	0	0	0	0	0	0	0	0
Root	Bacteria	Proteobacteria	Betaproteobacteria	Rhodocyclales	Rhodocyclaceae	Azoarcus	Azoarcus_sp	1	0	0	0	0	0	0	0	0	0	0	0	0	0	0	0	0	0	0	0	0	0	0	0	0	0	0	0	0	0	0	0	0	0	0	0	0	0	1	0	0
Root	Bacteria	Proteobacteria	Betaproteobacteria	Rhodocyclales	Rhodocyclaceae	CandidatusAccumulibacter	CandidatusAccumulibacter_sp	1	0	0	0	0	0	0	0	0	0	0	0	0	0	0	0	0	0	0	0	0	0	0	0	0	0	0	0	0	0	0	0	0	0	0	0	0	0	0	1	0
Root	Bacteria	Proteobacteria	Betaproteobacteria	Rhodocyclales	Rhodocyclaceae	Propionivibrio	Propionivibrio_sp	1	0	0	0	0	0	0	0	0	0	0	0	0	0	0	0	0	0	0	0	0	0	0	0	0	0	1	0	0	0	0	0	0	0	0	0	0	0	0	0	0
Root	Bacteria	Proteobacteria	Betaproteobacteria	Rhodocyclales	Rhodocyclaceae	Sterolibacterium	Sterolibacterium_sp	1	0	0	0	0	0	0	0	1	0	0	0	0	0	0	0	0	0	0	0	0	0	0	0	0	0	0	0	0	0	0	0	0	0	0	0	0	0	0	0	0
Root	Bacteria	Proteobacteria	Betaproteobacteria	Rhodocyclales	Rhodocyclaceae	Uliginosibacterium	Uliginosibacterium_sp	1	0	0	0	0	0	0	0	0	0	0	0	0	0	0	0	0	0	0	0	0	0	0	0	0	1	0	0	0	0	0	0	0	0	0	0	0	0	0	0	0
Root	Bacteria	Proteobacteria	Betaproteobacteria	Tremblayales	Tremblayaceae	Tremblayaceae_g	Tremblayaceae_sp	1	0	0	0	0	0	0	0	0	0	0	0	0	0	0	0	0	0	0	0	0	0	0	0	0	0	0	0	0	0	0	0	0	0	0	0	1	0	0	0	0
Root	Bacteria	Proteobacteria	Deltaproteobacteria	DTB120	DTB120_f	DTB120_g	DTB120_sp	1	0	0	0	0	0	0	0	0	0	0	0	0	1	0	0	0	0	0	0	0	0	0	0	0	0	0	0	0	0	0	0	0	0	0	0	0	0	0	0	0
Root	Bacteria	Proteobacteria	Deltaproteobacteria	Desulfovibrionales	Desulfovibrionaceae	Desulfovibrio	Desulfovibrio litoralis	1	0	0	0	0	0	0	0	0	0	0	0	0	0	0	0	0	0	0	0	0	0	0	0	0	0	0	0	0	0	1	0	0	0	0	0	0	0	0	0	0
Root	Bacteria	Proteobacteria	Deltaproteobacteria	Desulfovibrionales	Desulfovibrionaceae	Lawsonia	Lawsonia_sp	1	0	0	0	0	1	0	0	0	0	0	0	0	0	0	0	0	0	0	0	0	0	0	0	0	0	0	0	0	0	0	0	0	0	0	0	0	0	0	0	0
Root	Bacteria	Proteobacteria	Deltaproteobacteria	Myxococcales	Myxococcales_f	Myxococcales_g	Myxococcales_sp	1	0	0	0	0	0	0	0	0	0	0	0	0	0	0	0	0	0	0	0	0	0	0	0	0	0	0	1	0	0	0	0	0	0	0	0	0	0	0	0	0
Root	Bacteria	Proteobacteria	Deltaproteobacteria	PB19	PB19_f	PB19_g	PB19_sp	1	0	0	0	0	0	0	0	0	0	0	0	0	0	0	0	0	0	0	0	0	0	0	1	0	0	0	0	0	0	0	0	0	0	0	0	0	0	0	0	0
Root	Bacteria	Proteobacteria	Deltaproteobacteria	Spirobacillales	Spirobacillales_f	Spirobacillales_g	Spirobacillales_sp	1	0	0	0	0	0	0	0	0	0	0	1	0	0	0	0	0	0	0	0	0	0	0	0	0	0	0	0	0	0	0	0	0	0	0	0	0	0	0	0	0
Root	Bacteria	Proteobacteria	Deltaproteobacteria	Sva0853	SAR324	SAR324_g	SAR324_sp	1	0	0	1	0	0	0	0	0	0	0	0	0	0	0	0	0	0	0	0	0	0	0	0	0	0	0	0	0	0	0	0	0	0	0	0	0	0	0	0	0
Root	Bacteria	Proteobacteria	Epsilonproteobacteria	Epsilonproteobacteria_o	Epsilonproteobacteria_f	Epsilonproteobacteria_g	Epsilonproteobacteria_sp	1	0	0	0	0	0	0	0	0	0	0	0	0	0	0	0	0	0	0	0	0	0	0	0	0	0	0	1	0	0	0	0	0	0	0	0	0	0	0	0	0
Root	Bacteria	Proteobacteria	Gammaproteobacteria	34P16	34P16_f	34P16_g	34P16_sp	1	0	0	0	0	0	0	0	0	0	0	0	0	0	0	0	0	0	0	0	0	0	0	0	0	0	0	0	1	0	0	0	0	0	0	0	0	0	0	0	0
Root	Bacteria	Proteobacteria	Gammaproteobacteria	Alteromonadales	Alteromonadaceae	Glaciecola	Glaciecola_sp	1	0	0	0	0	0	0	0	0	0	0	0	0	0	0	0	0	0	0	0	0	0	0	0	0	0	0	0	0	0	1	0	0	0	0	0	0	0	0	0	0
Root	Bacteria	Proteobacteria	Gammaproteobacteria	Alteromonadales	Alteromonadaceae	HB2-32-21	HB2-32-21_sp	1	0	0	0	0	0	0	0	0	0	0	1	0	0	0	0	0	0	0	0	0	0	0	0	0	0	0	0	0	0	0	0	0	0	0	0	0	0	0	0	0
Root	Bacteria	Proteobacteria	Gammaproteobacteria	Alteromonadales	Alteromonadaceae	Marinobacter	Marinobacter_sp	1	0	0	0	0	0	0	0	0	0	0	0	0	0	0	0	0	0	0	0	0	0	0	0	0	0	0	0	1	0	0	0	0	0	0	0	0	0	0	0	0
Root	Bacteria	Proteobacteria	Gammaproteobacteria	Alteromonadales	Idiomarinaceae	Pseudidiomarina	Pseudidiomarina_sp	1	0	0	0	0	0	0	0	0	0	0	0	0	0	0	0	0	0	0	0	0	0	0	0	0	0	0	0	1	0	0	0	0	0	0	0	0	0	0	0	0
Root	Bacteria	Proteobacteria	Gammaproteobacteria	Chromatiales	Chromatiaceae	Chromatiaceae_g	Chromatiaceae_sp	1	0	0	0	0	0	0	0	0	0	0	0	0	0	0	0	0	0	0	0	0	0	0	0	0	0	0	1	0	0	0	0	0	0	0	0	0	0	0	0	0
Root	Bacteria	Proteobacteria	Gammaproteobacteria	Cardiobacteriales	Cardiobacteriaceae	Cardiobacterium	Cardiobacterium_sp	1	0	0	0	0	0	0	0	0	0	0	0	0	0	0	0	0	0	0	0	0	0	0	0	0	0	0	0	1	0	0	0	0	0	0	0	0	0	0	0	0
Root	Bacteria	Proteobacteria	Gammaproteobacteria	Chromatiales	Chromatiaceae	Nitrosococcus	Nitrosococcus_sp	1	0	0	0	0	0	0	0	0	0	0	0	0	0	0	0	0	0	0	0	0	0	0	0	0	0	0	0	0	0	0	0	1	0	0	0	0	0	0	0	0
Root	Bacteria	Proteobacteria	Gammaproteobacteria	Enterobacteriales	Enterobacteriaceae	Aquamonas	Aquamonas haywardensis	1	0	0	0	0	0	0	0	0	0	0	0	0	0	0	0	0	0	0	0	0	0	0	0	0	0	0	1	0	0	0	0	0	0	0	0	0	0	0	0	0
Root	Bacteria	Proteobacteria	Gammaproteobacteria	Enterobacteriales	Enterobacteriaceae	Brenneria	Brenneria salicis	1	0	0	0	0	0	0	0	0	0	0	0	0	0	0	0	0	0	0	0	0	0	0	0	0	0	0	1	0	0	0	0	0	0	0	0	0	0	0	0	0
Root	Bacteria	Proteobacteria	Gammaproteobacteria	Enterobacteriales	Enterobacteriaceae	Buchnera	Buchnera aphidicola	1	0	0	0	0	0	0	0	0	0	0	0	0	0	0	0	0	0	0	0	0	0	0	0	0	0	0	1	0	0	0	0	0	0	0	0	0	0	0	0	0
Root	Bacteria	Proteobacteria	Gammaproteobacteria	Enterobacteriales	Enterobacteriaceae	Enterobacter	Enterobacter ludwigii	1	0	0	0	0	0	0	0	0	0	0	0	0	0	0	0	0	0	0	0	0	0	0	0	0	0	0	0	1	0	0	0	0	0	0	0	0	0	0	0	0
Root	Bacteria	Proteobacteria	Gammaproteobacteria	Enterobacteriales	Enterobacteriaceae	Enterobacter	Enterobacter radicincitans	1	0	0	0	0	0	0	0	0	0	0	0	0	0	0	0	0	0	0	0	0	0	0	0	0	0	0	0	1	0	0	0	0	0	0	0	0	0	0	0	0
Root	Bacteria	Proteobacteria	Gammaproteobacteria	Enterobacteriales	Enterobacteriaceae	Escherichia	Escherichia coli	1	0	0	0	0	0	0	0	0	0	0	0	0	0	0	0	0	0	0	0	0	0	0	0	0	0	0	0	1	0	0	0	0	0	0	0	0	0	0	0	0
Root	Bacteria	Proteobacteria	Gammaproteobacteria	Enterobacteriales	Enterobacteriaceae	Gluconacetobacter	Gluconacetobacter liquefaciens	1	0	0	0	0	0	0	0	0	0	0	0	0	0	0	0	0	0	0	0	0	0	0	0	0	0	0	0	1	0	0	0	0	0	0	0	0	0	0	0	0
Root	Bacteria	Proteobacteria	Gammaproteobacteria	Enterobacteriales	Enterobacteriaceae	Photorhabdus	Photorhabdus temperata	1	0	0	0	0	0	0	0	0	0	0	0	0	0	0	0	0	0	0	0	0	0	0	0	0	0	0	0	1	0	0	0	0	0	0	0	0	0	0	0	0
Root	Bacteria	Proteobacteria	Gammaproteobacteria	Enterobacteriales	Enterobacteriaceae	Raoultella	Raoultella terrigena	1	0	0	0	0	0	0	0	0	0	0	0	0	0	0	0	0	0	0	0	0	0	0	0	0	0	0	0	1	0	0	0	0	0	0	0	0	0	0	0	0
Root	Bacteria	Proteobacteria	Gammaproteobacteria	Enterobacteriales	Enterobacteriaceae	Serratia	Serratia rubidaea	1	0	0	0	0	0	0	0	0	0	0	0	0	0	0	0	0	0	0	0	0	0	0	0	0	0	0	0	1	0	0	0	0	0	0	0	0	0	0	0	0
Root	Bacteria	Proteobacteria	Gammaproteobacteria	Enterobacteriales	Enterobacteriaceae	Xenorhabdus	Xenorhabdus budapestensis	1	0	0	0	0	0	0	0	0	0	0	0	0	0	0	0	0	0	0	0	0	0	0	0	0	0	0	1	0	0	0	0	0	0	0	0	0	0	0	0	0
Root	Bacteria	Proteobacteria	Gammaproteobacteria	Enterobacteriales	Enterobacteriaceae	Xenorhabdus	Xenorhabdus poinarii	1	0	0	0	0	0	0	0	0	0	0	0	0	0	0	0	0	0	0	0	0	0	0	0	0	0	0	0	1	0	0	0	0	0	0	0	0	0	0	0	0
Root	Bacteria	Proteobacteria	Gammaproteobacteria	Enterobacteriales	Enterobacteriaceae	Xenorhabdus	Xenorhabdus romanii	1	0	0	0	0	0	0	0	0	0	0	0	0	0	0	0	0	0	0	0	0	0	0	0	0	0	0	0	1	0	0	0	0	0	0	0	0	0	0	0	0
Root	Bacteria	Proteobacteria	Gammaproteobacteria	Legionellales	Legionellaceae	Tatlockia	Tatlockia_sp	1	0	0	1	0	0	0	0	0	0	0	0	0	0	0	0	0	0	0	0	0	0	0	0	0	0	0	0	0	0	0	0	0	0	0	0	0	0	0	0	0
Root	Bacteria	Proteobacteria	Gammaproteobacteria	Oceanospirillales	Alcanivoracaceae	Alcanivorax	Alcanivorax_sp	1	0	0	0	0	0	0	0	0	0	0	0	0	0	0	0	0	0	0	0	0	0	0	0	0	0	0	0	1	0	0	0	0	0	0	0	0	0	0	0	0
Root	Bacteria	Proteobacteria	Gammaproteobacteria	Oceanospirillales	Alcanivoracaceae	Alcanivorax	Alcanivorax venustensis	1	0	0	0	0	0	0	0	0	0	0	0	0	0	0	0	0	0	0	0	0	0	0	0	0	0	0	0	1	0	0	0	0	0	0	0	0	0	0	0	0
Root	Bacteria	Proteobacteria	Gammaproteobacteria	Oceanospirillales	Hahellaceae	Hahella	Hahella_sp	1	0	0	0	0	0	0	0	0	0	0	0	0	0	0	0	0	0	0	0	0	0	0	0	0	0	0	1	0	0	0	0	0	0	0	0	0	0	0	0	0
Root	Bacteria	Proteobacteria	Gammaproteobacteria	Oceanospirillales	Halomonadaceae	CandidatusPortiera	CandidatusPortiera_sp	1	1	0	0	0	0	0	0	0	0	0	0	0	0	0	0	0	0	0	0	0	0	0	0	0	0	0	0	0	0	0	0	0	0	0	0	0	0	0	0	0
Root	Bacteria	Proteobacteria	Gammaproteobacteria	Pasteurellales	Pasteurellaceae	Aggregatibacter	Aggregatibacter segnis	1	0	0	0	0	0	0	0	0	0	0	0	0	0	0	0	1	0	0	0	0	0	0	0	0	0	0	0	0	0	0	0	0	0	0	0	0	0	0	0	0
Root	Bacteria	Proteobacteria	Gammaproteobacteria	Pasteurellales	Pasteurellaceae	Gallibacterium	Gallibacterium_sp	1	0	0	0	0	0	0	0	0	0	0	0	0	0	0	0	0	0	0	0	0	0	0	0	0	0	0	0	1	0	0	0	0	0	0	0	0	0	0	0	0
Root	Bacteria	Proteobacteria	Gammaproteobacteria	Pasteurellales	Pasteurellaceae	Haemophilus	Haemophilus felis	1	0	0	0	0	0	0	0	0	0	1	0	0	0	0	0	0	0	0	0	0	0	0	0	0	0	0	0	0	0	0	0	0	0	0	0	0	0	0	0	0
Root	Bacteria	Proteobacteria	Gammaproteobacteria	Pasteurellales	Pasteurellaceae	Haemophilus	Haemophilus influenzae	1	0	0	0	0	0	0	0	0	0	0	0	0	0	0	0	0	0	0	0	0	0	0	0	0	0	1	0	0	0	0	0	0	0	0	0	0	0	0	0	0
Root	Bacteria	Proteobacteria	Gammaproteobacteria	Pasteurellales	Pasteurellaceae	Necropsobacter	Necropsobacter rosorum	1	0	0	0	0	0	0	0	0	0	0	0	0	0	0	0	0	0	0	0	0	0	0	0	0	0	0	0	0	1	0	0	0	0	0	0	0	0	0	0	0
Root	Bacteria	Proteobacteria	Gammaproteobacteria	Pseudomonadales	Moraxellaceae	Acinetobacter	Acinetobacter rhizosphaerae	1	0	0	0	0	0	0	0	0	0	0	0	0	0	0	0	0	0	0	0	0	0	0	0	0	0	0	0	1	0	0	0	0	0	0	0	0	0	0	0	0
Root	Bacteria	Proteobacteria	Gammaproteobacteria	Pseudomonadales	Moraxellaceae	Moraxella	Moraxella_sp	1	0	0	0	0	0	0	0	0	0	0	0	0	0	0	0	0	0	0	0	0	0	0	0	0	0	0	1	0	0	0	0	0	0	0	0	0	0	0	0	0
Root	Bacteria	Proteobacteria	Gammaproteobacteria	Pseudomonadales	Pseudomonadaceae	Pseudomonas	Pseudomonas viridiflava	1	0	0	0	0	0	0	1	0	0	0	0	0	0	0	0	0	0	0	0	0	0	0	0	0	0	0	0	0	0	0	0	0	0	0	0	0	0	0	0	0
Root	Bacteria	Proteobacteria	Gammaproteobacteria	Thiotrichales	Piscirickettsiaceae	Piscirickettsiaceae_g	Piscirickettsiaceae_sp	1	0	0	0	0	0	0	0	1	0	0	0	0	0	0	0	0	0	0	0	0	0	0	0	0	0	0	0	0	0	0	0	0	0	0	0	0	0	0	0	0
Root	Bacteria	Proteobacteria	Gammaproteobacteria	Thiotrichales	Thiotrichaceae	Thiopilula	Thiopilula aggregata	1	0	0	0	0	0	0	0	0	0	0	0	0	0	0	0	0	0	0	0	0	0	0	0	0	0	0	1	0	0	0	0	0	0	0	0	0	0	0	0	0
Root	Bacteria	Proteobacteria	Gammaproteobacteria	Thiotrichales	Thiotrichaceae	Thiothrix	Thiothrix_sp	1	0	0	0	0	0	0	0	0	0	0	0	0	0	0	0	0	0	0	0	0	0	0	0	0	0	0	0	0	0	0	1	0	0	0	0	0	0	0	0	0
Root	Bacteria	Proteobacteria	Gammaproteobacteria	Xanthomonadales	Xanthomonadaceae	Pseudoxanthomonas	Pseudoxanthomonas mexicana	1	0	0	0	0	0	0	0	0	0	0	0	0	0	0	0	0	0	0	0	0	0	0	0	0	0	0	0	1	0	0	0	0	0	0	0	0	0	0	0	0
Root	Bacteria	Spirochaetes	Spirochaetes	Sphaerochaetales	Sphaerochaetaceae	Sphaerochaetaceae_g	Sphaerochaetaceae_sp	1	0	0	0	0	0	0	0	0	0	0	0	0	0	0	0	0	0	0	0	0	0	0	0	0	0	0	0	0	0	0	0	0	0	1	0	0	0	0	0	0
Root	Bacteria	Synergistetes	Synergistia	Synergistales	Synergistaceae	Aminobacterium	Aminobacterium_sp	1	0	0	1	0	0	0	0	0	0	0	0	0	0	0	0	0	0	0	0	0	0	0	0	0	0	0	0	0	0	0	0	0	0	0	0	0	0	0	0	0
Root	Bacteria	Synergistetes	Synergistia	Synergistales	Synergistaceae	Jonquetella	Jonquetella anthropi	1	0	0	0	0	0	0	0	0	0	0	0	1	0	0	0	0	0	0	0	0	0	0	0	0	0	0	0	0	0	0	0	0	0	0	0	0	0	0	0	0
Root	Bacteria	Synergistetes	Synergistia	Synergistales	Synergistaceae	Pyramidobacter	Pyramidobacter_sp	1	0	0	0	0	1	0	0	0	0	0	0	0	0	0	0	0	0	0	0	0	0	0	0	0	0	0	0	0	0	0	0	0	0	0	0	0	0	0	0	0
Root	Bacteria	Synergistetes	Synergistia	Synergistales	Synergistaceae	Synergistaceae_g	Synergistaceae_sp	1	0	0	0	0	0	0	0	0	0	0	0	0	0	0	0	0	0	0	0	0	0	0	0	0	0	0	0	0	0	0	1	0	0	0	0	0	0	0	0	0
Root	Bacteria	Synergistetes	Synergistia	Synergistales	Synergistaceae	Cloacibacillus	Cloacibacillus_sp	1	0	1	0	0	0	0	0	0	0	0	0	0	0	0	0	0	0	0	0	0	0	0	0	0	0	0	0	0	0	0	0	0	0	0	0	0	0	0	0	0
Root	Bacteria	Synergistetes	Synergistia	Synergistales	Synergistaceae	vadinCA02	vadinCA02_sp	1	0	0	0	0	0	0	0	0	0	0	0	0	0	0	0	0	0	0	0	0	0	0	0	0	0	0	0	0	0	0	0	1	0	0	0	0	0	0	0	0
Root	Bacteria	Synergistetes	Synergistia	Synergistales	TTA_B6	E6	E6_sp	1	0	0	0	0	0	0	0	0	0	0	0	0	0	0	0	0	0	0	0	0	0	0	0	0	0	0	0	0	0	0	0	1	0	0	0	0	0	0	0	0
Root	Bacteria	TM7	TM7-3	I025	I025_f	I025_g	I025_sp	1	0	0	0	0	0	0	0	0	0	0	0	0	0	0	0	0	0	0	0	0	0	0	0	0	0	0	0	0	1	0	0	0	0	0	0	0	0	0	0	0
Root	Bacteria	Tenericutes	Mollicutes	Mycoplasmatales	Mycoplasmataceae	Mycoplasma	Mycoplasma_sp	1	0	0	0	0	0	0	0	0	0	0	0	0	0	0	0	0	0	0	0	0	0	0	0	0	0	0	0	0	0	0	0	1	0	0	0	0	0	0	0	0
Root	Bacteria	Verrucomicrobia	Verrucomicrobiae	Verrucomicrobiales	Verrucomicrobiaceae	Verrucomicrobium	Verrucomicrobium_sp	1	0	0	0	0	0	0	0	0	0	0	0	0	0	0	0	0	0	0	0	0	0	0	0	1	0	0	0	0	0	0	0	0	0	0	0	0	0	0	0	0
Root	Bacteria	Verrucomicrobia	Pedosphaerae	Pedosphaerales	Pedosphaerales_f	Pedosphaerales_g	Pedosphaerales_sp	1	0	0	0	0	0	0	0	0	0	0	0	0	0	0	0	0	0	0	0	0	0	0	0	1	0	0	0	0	0	0	0	0	0	0	0	0	0	0	0	0
Root	Bacteria	WS2	Kazan-3B-09	Kazan-3B-09_o	Kazan-3B-09_f	Kazan-3B-09_g	Kazan-3B-09_sp	1	0	0	0	0	0	0	0	0	0	0	0	0	0	0	0	0	0	0	0	0	0	0	0	0	0	0	1	0	0	0	0	0	0	0	0	0	0	0	0	0
Root	Bacteria	Thermi	Deinococci	Thermales	Thermaceae	Meiothermus	Meiothermus_sp	1	0	0	0	0	0	0	0	0	0	0	0	0	0	0	0	0	0	0	0	0	0	0	0	0	0	0	0	0	0	0	0	0	1	0	0	0	0	0	0	0

## Sheet: Kelpie OTU counts
																		2052	2344	2607	3005	2592	2413	4203	3853	2052	1750	4482	4155	2727	2533	785	674	2041	1681	2638	2352	2806	2576	2503	2292	3100	2813	6976	6255	1185	1135	1924	2030
OTU	Size	RDP classification	Kingdom	Phylum		Class		Order		Family		Genus		Confidence	Closest Species	Match%	Match#	ERR695598	ERR695599	ERR695600	ERR695601	ERR695602	ERR695603	ERR695604	ERR695605	ERR695606	ERR695607	ERR695608	ERR695609	ERR695610	ERR695611	ERR695612	ERR695613	ERR695614	ERR695615	ERR695616	ERR695617	ERR695618	ERR695619	ERR695620	ERR695621	ERR695622	ERR695623	ERR695624	ERR695625	ERR695626	ERR695627	ERR695628	ERR695629
OTU_1	19769	Root	Bacteria	Bacteroidetes	.	Bacteroidia	.	Bacteroidales	.	Bacteroidaceae	.	Bacteroides	.	1	Bacteroides_dorei_(T)_JCM_13471;_175_(AB242142)	99.6	2	258	308	203	277	362	297	401	461	364	247	1325	985	219	177	10	18	169	47	249	259	1893	1815	183	147	2173	1975	1261	1222	56	16	243	279
OTU_4	7177	Root	Bacteria	Firmicutes	.	Clostridia	.	Clostridiales	.	Ruminococcaceae	.	Faecalibacterium	.	1	Faecalibacterium_prausnitzii_(T)_ATCC_27768_(AJ413954)	98.8	1	175	201	184	245	298	266	459	388	132	104	222	163	163	149	75	47	226	180	302	251	0	0	12	9	0	0	705	604	5	6	179	256
OTU_2	6589	Root	Bacteria	Bacteroidetes	.	Bacteroidia	.	Bacteroidales	.	Prevotellaceae	.	Prevotella	.	1	Prevotella_copri_(T)_CB7_(AB064923)	100	1	0	0	0	0	0	0	0	0	78	57	20	9	365	334	80	67	351	326	457	478	0	0	0	0	0	0	0	0	6	4	0	0
OTU_5	4891	Root	Bacteria	Firmicutes	.	Clostridia	.	Clostridiales	.	Lachnospiraceae	.	Roseburia	.	0.99	Eubacterium_rectale_(T)_(L34627)	100	1	113	170	428	491	65	80	270	230	156	116	151	110	82	69	27	26	34	30	45	42	28	20	0	2	24	16	348	344	0	0	192	206
OTU_3	4706	Root	Bacteria	Proteobacteria	.	Gammaproteobacteria	.	Enterobacteriales	.	Enterobacteriaceae	.	Enterobacter	.	0.51	Enterobacter_cancerogenus_(T)_LMG_2693_(Z96078)	100	33	0	0	0	0	0	0	0	0	0	0	0	0	0	0	0	0	0	0	0	0	0	0	0	0	0	0	2490	2214	2	0	0	0
OTU_9	3719	Root	Bacteria	Bacteroidetes	.	Bacteroidia	.	Bacteroidales	.	Bacteroidaceae	.	Bacteroides	.	1	Bacteroides_finegoldii_(T)_JCM_13345;_199T_(AB222699)	100	1	181	179	55	74	273	230	161	70	85	75	184	206	29	44	0	0	40	38	61	44	72	66	25	21	103	88	414	261	10	11	157	128
OTU_12	2561	Root	Bacteria	Firmicutes	.	Clostridia	.	Clostridiales	.	Lachnospiraceae	.	Lachnospiracea_incertae_sedis	.	0.85	Eubacterium_eligens_(T)_(L34420)	99.6	1	113	113	45	40	165	139	202	170	27	38	103	90	77	77	24	23	23	33	57	42	0	0	0	0	0	0	141	90	3	0	0	0
OTU_7	2480	Root	Bacteria	Bacteroidetes	.	Bacteroidia	.	Bacteroidales	.	Bacteroidaceae	.	Bacteroides	.	1	Bacteroides_coprocola_(T)_M16_(AB200224)	100	1	34	46	149	121	18	39	13	0	159	187	458	645	27	10	0	0	0	0	0	0	0	0	0	0	0	0	207	191	0	0	0	0
OTU_8	2480	Root	Bacteria	Bacteroidetes	.	Bacteroidia	.	Bacteroidales	.	Bacteroidaceae	.	Bacteroides	.	1	Bacteroides_uniformis_(T)_JCM_5828T_(AB050110)	100	1	116	90	25	36	126	137	58	61	28	13	42	42	15	27	0	0	49	20	42	68	72	93	128	151	79	90	167	162	96	92	36	34
OTU_6	2286	Root	Bacteria	Firmicutes	.	Clostridia	.	Clostridiales	.	Lachnospiraceae	.	.	.	1	Lactobacillus_rogosae_strain_ATCC_27753_(NR_104836.1)	100	1	32	51	6	8	85	93	202	180	59	64	182	144	113	66	26	29	54	42	59	61	38	30	0	4	53	31	1	0	0	0	19	11
OTU_13	1937	Root	Bacteria	Bacteroidetes	.	Bacteroidia	.	Bacteroidales	.	Porphyromonadaceae	.	Parabacteroides	.	1	Parabacteroides_distasonis_(T)_JCM_5825_(AB238922)	99.2	1	0	6	20	17	0	0	102	92	13	23	43	41	0	0	0	0	27	20	52	28	236	185	95	46	229	169	151	165	50	63	0	38
OTU_10	1612	Root	Bacteria	Proteobacteria	.	Betaproteobacteria	.	Burkholderiales	.	Sutterellaceae	.	Sutterella	.	1	Sutterella_wadsworthensis_(T)_WAL_9799_(GU585669)	100	1	18	28	0	0	37	40	5	8	50	43	85	83	11	15	0	0	17	8	19	10	195	179	15	11	213	185	52	50	0	0	30	33
OTU_11	1386	Root	Bacteria	Bacteroidetes	.	Bacteroidia	.	Bacteroidales	.	Prevotellaceae	.	Prevotella	.	1	Prevotella_stercorea_(T)_CB35_(AB244774)	98.4	1	0	0	0	0	0	0	0	0	0	0	0	0	0	0	0	0	0	0	0	0	0	0	0	0	0	0	0	0	0	0	0	0
OTU_15	1336	Root	Bacteria	Firmicutes	.	Clostridia	.	Clostridiales	.	Lachnospiraceae	.	Anaerostipes	.	1	Anaerostipes_sp._5_1_63FAA_(JF412658)	100	3	12	12	22	28	28	25	124	132	18	8	77	70	11	4	15	16	39	51	64	70	20	15	0	0	19	15	0	0	0	0	0	3
OTU_14	1233	Root	Bacteria	Firmicutes	.	Clostridia	.	Clostridiales	.	Lachnospiraceae	.	Blautia	.	1	Blautia_luti_strain_DSM_14534_(NR_114315.1)	100	2	9	15	31	49	10	18	57	65	8	13	85	79	12	12	40	35	16	12	20	23	6	10	6	5	11	5	1	0	0	0	16	14
OTU_17	1174	Root	Bacteria	Firmicutes	.	Clostridia	.	Clostridiales	.	Lachnospiraceae	.	Fusicatenibacter	.	0.96	Fusicatenibacter_saccharivorans_HT03-11_(AB698910)	100	1	13	20	18	34	30	20	59	112	8	4	29	21	3	6	26	12	49	45	70	32	0	7	0	0	8	0	0	0	0	0	28	30
OTU_16	1163	Root	Bacteria	Firmicutes	.	Negativicutes	.	Selenomonadales	.	Veillonellaceae	.	Megamonas	.	0.93	Megamonas_funiformis_(T)_YIT_11815_(=_JCM_14723,_=_DSM_19343)_(AB300988)	100	1	0	0	0	0	0	0	0	0	27	25	96	93	0	0	33	29	3	0	0	0	0	0	0	0	0	0	0	0	0	0	0	0
OTU_21	1135	Root	Bacteria	Bacteroidetes	.	Bacteroidia	.	Bacteroidales	.	Porphyromonadaceae	.	Parabacteroides	.	1	Parabacteroides_goldsteinii_(T)_WAL_12034_(AY974070)	100	1	0	0	22	0	0	0	0	0	0	0	0	0	0	0	0	0	0	0	0	0	0	0	99	89	0	0	0	0	60	60	0	0
OTU_20	1079	Root	Bacteria	Firmicutes	.	Clostridia	.	Clostridiales	.	Lachnospiraceae	.	Roseburia	.	1	Roseburia_inulinivorans_(T)_type_strain:_A2-194_(AJ270473)	100	1	12	7	1	5	4	2	170	150	45	59	52	74	0	15	22	17	19	42	42	22	0	0	0	0	4	9	39	54	0	0	0	3
OTU_18	1063	Root	Bacteria	Bacteroidetes	.	Bacteroidia	.	Bacteroidales	.	Bacteroidaceae	.	Bacteroides	.	1	Bacteroides_massiliensis_(T)_B84634_(AY126616)	100	1	112	120	0	0	201	217	0	0	22	13	67	84	47	50	0	0	28	26	37	25	0	0	0	0	0	0	0	0	0	0	0	0
OTU_25	930	Root	Bacteria	Firmicutes	.	Clostridia	.	Clostridiales	.	Lachnospiraceae	.	Clostridium XlVa	.	0.66	Clostridium_algidixylanolyticum_(T)_SPL73_(AF092549)	97.6	2	8	6	10	19	0	0	58	58	18	17	23	38	35	38	18	2	18	10	15	19	0	0	0	0	0	0	252	188	0	0	0	0
OTU_19	922	Root	Bacteria	Firmicutes	.	Clostridia	.	Clostridiales	.	Lachnospiraceae	.	Coprococcus	.	0.98	Coprococcus_comes_(T)_ATCC_27758_(EF031542)	100	1	15	27	28	16	13	17	113	73	30	31	52	42	22	21	18	0	23	0	33	22	0	0	0	5	0	0	0	0	0	0	34	26
OTU_27	845	Root	Bacteria	Firmicutes	.	Clostridia	.	Clostridiales	.	Ruminococcaceae	.	Gemmiger	.	0.81	Gemmiger_formicilis_(T)_ATCC_27749;_X2-56_(GU562446)	100	1	37	29	64	58	15	15	30	37	34	31	53	52	9	12	34	25	15	24	11	16	0	0	35	27	0	0	0	0	0	0	34	29
OTU_46	816	Root	Bacteria	Actinobacteria	.	Actinobacteria	Actinobacteridae	Bifidobacteriales	.	Bifidobacteriaceae	.	Bifidobacterium	.	1	Bifidobacterium_stercoris_(T)_Eg1_(FJ611793)	100	6	6	5	19	14	7	9	13	12	25	10	20	11	12	6	0	3	15	18	23	27	0	0	0	0	0	0	11	13	0	0	116	133
OTU_24	808	Root	Bacteria	Firmicutes	.	Negativicutes	.	Selenomonadales	.	Acidaminococcaceae	.	Phascolarctobacterium	.	1	Phascolarctobacterium_faecium_(T)_(X72865)	100	1	18	26	1	5	0	0	253	222	15	15	26	29	0	0	6	10	0	0	0	0	0	0	0	0	0	0	51	72	0	0	0	0
OTU_23	806	Root	Bacteria	Bacteroidetes	.	Bacteroidia	.	Bacteroidales	.	Bacteroidaceae	.	Bacteroides	.	1	Bacteroides_stercoris_(T)_type_strain:_ATCC_43183_(X83953)	100	1	0	0	0	0	0	0	129	184	0	0	0	0	51	72	0	0	91	37	62	47	0	0	0	0	0	0	61	49	0	0	0	0
OTU_22	784	Root	Bacteria	Bacteroidetes	.	Bacteroidia	.	Bacteroidales	.	Rikenellaceae	.	Alistipes	.	1	Alistipes_putredinis_(T)_(L16497)	99.2	1	42	29	24	40	57	31	10	8	46	35	61	58	20	22	0	0	13	23	22	17	0	0	28	59	0	0	0	0	12	11	59	37
OTU_38	702	Root	Bacteria	Bacteroidetes	.	Bacteroidia	.	Bacteroidales	.	Rikenellaceae	.	Alistipes	.	1	Alistipes_onderdonkii_(T)_WAL_8169_(AY974071)	100	1	11	6	34	30	9	5	0	0	6	7	8	6	13	6	0	0	5	17	22	16	0	0	113	117	0	0	16	9	82	85	10	23
OTU_76	680	Root	Bacteria	Bacteroidetes	.	Bacteroidia	.	Bacteroidales	.	Porphyromonadaceae	.	Parabacteroides	.	1	Parabacteroides_johnsonii_(T)_JCM_13406;_M-165_(AB261128)	100	1	32	34	18	38	73	60	18	16	23	8	66	67	27	20	0	0	20	18	23	27	0	0	11	9	0	0	0	0	7	2	27	22
OTU_31	661	Root	Bacteria	Bacteroidetes	.	Bacteroidia	.	Bacteroidales	.	Prevotellaceae	.	Alloprevotella	.	0.98	Prevotellamassilia_timonensis_strain_Marseille-P2831_(NR_144750.1)	98.4	1	0	0	0	0	0	0	0	0	0	0	0	0	0	0	0	0	0	0	0	0	0	0	0	0	0	0	0	0	0	0	0	0
OTU_28	660	Root	Bacteria	Firmicutes	.	Clostridia	.	Clostridiales	.	Lachnospiraceae	.	.	.	0.95	Clostridium_sphenoides_(T)_ATCC_19403_(AB075772)	95.7	4	20	23	67	20	69	48	160	129	0	2	7	5	7	0	20	14	0	5	3	4	0	0	0	0	0	0	0	0	0	0	0	0
OTU_26	659	Root	Bacteria	Firmicutes	.	Clostridia	.	Clostridiales	.	Ruminococcaceae	.	.	.	0.74	Clostridium_cellobioparum_(T)_DSM_1351_(X71856)	90.9	2	8	22	34	27	0	2	0	0	19	16	78	61	73	70	11	13	26	14	19	11	0	0	0	0	0	0	0	0	0	0	48	53
OTU_29	623	Root	Bacteria	Bacteroidetes	.	Bacteroidia	.	Bacteroidales	.	Porphyromonadaceae	.	Odoribacter	.	1	Odoribacter_splanchnicus_strain_NCTC_10825_(L16496)	98.8	1	7	31	6	3	12	8	0	0	7	17	20	21	5	0	0	0	0	0	0	0	0	0	108	114	0	0	43	31	49	61	14	15
OTU_32	608	Root	Bacteria	Firmicutes	.	Negativicutes	.	Selenomonadales	.	Veillonellaceae	.	Dialister	.	1	Dialister_invisus_(T)_E7.25_(AY162469)	100	1	11	5	0	0	21	19	0	0	3	0	0	0	105	93	0	0	44	46	85	72	0	0	2	0	0	0	0	0	0	0	37	23
OTU_30	583	Root	Bacteria	Bacteroidetes	.	Bacteroidia	.	Bacteroidales	.	Prevotellaceae	.	Paraprevotella	.	1	Paraprevotella_clara_(T)_YIT_11840_(=_JCM_14859,_=_DSM_19731)_(AB331896)	99.6	1	0	0	0	0	0	0	0	0	0	0	0	0	218	210	0	0	37	36	38	44	0	0	0	0	0	0	0	0	0	0	0	0
OTU_44	574	Root	Bacteria	Firmicutes	.	Clostridia	.	Clostridiales	.	Lachnospiraceae	.	Ruminococcus2	.	1	Ruminococcus_faecis_(T)_Eg2_(FJ611794)	100	1	4	9	26	2	14	11	103	102	12	11	19	17	0	4	10	24	6	8	7	8	0	3	10	0	0	10	0	0	0	0	2	3
OTU_69	571	Root	Bacteria	Firmicutes	.	Erysipelotrichia	.	Erysipelotrichales	.	Erysipelotrichaceae	.	Holdemanella	.	1	[Eubacterium]_biforme_DSM_3989_(M59230)	97.6	1	3	7	31	43	0	0	0	0	0	0	0	0	50	42	0	0	29	32	42	29	0	0	0	0	0	0	0	0	0	0	36	60
OTU_33	568	Root	Bacteria	Firmicutes	.	.	.	.	.	.	.	.	.	0.95	Papillibacter_cinnamivorans_(T)_CIN1;_DSM12816_(AF167711)	89.7	1	0	0	0	0	0	0	0	0	0	0	0	0	0	0	0	0	0	0	0	0	0	0	170	137	0	0	0	0	95	110	0	0
OTU_35	562	Root	Bacteria	Firmicutes	.	Clostridia	.	Clostridiales	.	Lachnospiraceae	.	Blautia	.	0.96	Blautia_luti_(T)_bln9_(AJ133124)	99.6	1	9	12	17	33	6	17	50	41	3	0	0	13	4	8	3	1	22	9	7	8	13	14	1	1	5	6	0	0	0	0	20	30
OTU_34	539	Root	Bacteria	Firmicutes	.	Clostridia	.	Clostridiales	.	.	.	.	.	0.77	Gracilibacter_thermotolerans_(T)_JW/YJL-S1_(DQ117465)	89.8	1	0	0	0	0	0	0	0	0	0	0	0	0	0	0	0	0	0	0	0	0	0	0	171	194	0	0	0	0	63	36	0	0
OTU_51	531	Root	Bacteria	Firmicutes	.	Clostridia	.	Clostridiales	.	Ruminococcaceae	.	Clostridium IV	.	0.98	Eubacterium_siraeum_strain_ATCC_29066_(L34625)	99.6	1	0	0	2	0	0	0	0	0	147	114	75	66	0	0	0	0	0	0	0	0	0	0	43	45	0	0	0	0	19	13	0	0
OTU_73	530	Root	Bacteria	Firmicutes	.	Clostridia	.	Clostridiales	.	Lachnospiraceae	.	Lachnospiracea_incertae_sedis	.	0.53	Eubacterium_ramulus_ATCC_29099_(L34623)	98.8	1	0	4	6	28	0	0	82	8	29	0	0	52	0	0	18	0	37	3	0	0	0	0	0	0	0	0	0	0	0	0	9	9
OTU_36	509	Root	Bacteria	Firmicutes	.	Clostridia	.	Clostridiales	.	Ruminococcaceae	.	Ruminococcus	.	1	Ruminococcus_champanellensis_18P13_type_strain:_18P13_(AJ515913)	98	1	14	18	39	56	8	10	0	0	0	0	0	0	62	62	6	4	28	34	32	33	0	0	0	0	0	0	0	0	0	0	18	22
OTU_84	506	Root	Bacteria	Firmicutes	.	Clostridia	.	Clostridiales	.	Ruminococcaceae	.	Oscillibacter	.	0.86	Oscillibacter_valericigenes_(T)_Sjm18-20_(=_NBRC_101213)_(AB238598)	94.1	1	19	10	6	3	22	14	0	0	0	3	36	45	73	40	15	6	15	15	17	18	0	0	0	0	0	0	0	0	0	0	29	24
OTU_58	486	Root	Bacteria	Firmicutes	.	Clostridia	.	Clostridiales	.	Lachnospiraceae	.	.	.	0.93	Lachnoclostridium_pacaense_strain_Marseille-P3100_(NR_147396.1)	94.9	1	9	17	5	0	27	32	21	33	7	9	10	21	17	13	3	6	6	4	3	4	31	35	0	0	46	31	0	0	0	0	13	15
OTU_37	475	Root	Bacteria	Firmicutes	.	Erysipelotrichia	.	Erysipelotrichales	.	Erysipelotrichaceae	.	Clostridium XVIII	.	0.75	Clostridium_saccharogumia_(T)_SDG-Mt85-3Db_(DQ100445)	93.3	1	19	18	13	22	34	32	0	0	15	11	25	15	0	2	14	5	8	8	6	11	0	0	0	0	0	0	0	0	0	0	0	0
OTU_82	464	Root	Bacteria	Bacteroidetes	.	Bacteroidia	.	Bacteroidales	.	Porphyromonadaceae	.	Barnesiella	.	1	Barnesiella_intestinihominis_(T)_YIT_11860_(AB370251)	98	1	15	21	33	44	18	20	22	11	0	0	12	22	31	28	0	0	20	16	24	27	0	0	0	0	0	0	0	0	0	0	47	50
OTU_39	455	Root	Bacteria	Firmicutes	.	Clostridia	.	Clostridiales	.	Lachnospiraceae	.	Lachnospiracea_incertae_sedis	.	0.58	Anaerobium_acetethylicum_strain_GluBS11_(NR_137405.1)	96.8	1	0	0	0	0	0	0	0	0	0	0	0	0	0	0	0	0	0	0	0	0	0	0	122	105	0	0	0	0	48	35	0	0
OTU_59	440	Root	Bacteria	Firmicutes	.	Clostridia	.	Clostridiales	.	Ruminococcaceae	.	.	.	0.67	Eubacterium_coprostanoligenes_(T)_HL_(HM037995)	94.5	1	23	27	102	113	0	4	0	0	29	28	0	19	15	17	0	0	11	17	19	16	0	0	0	0	0	0	0	0	0	0	0	0
OTU_40	436	Root	Bacteria	Firmicutes	.	.	.	.	.	.	.	.	.	0.75	Gracilibacter_thermotolerans_(T)_JW/YJL-S1_(DQ117465)	86.6	1	37	32	80	100	17	12	0	0	29	29	26	35	13	8	0	0	0	10	8	0	0	0	0	0	0	0	0	0	0	0	0	0
OTU_49	422	Root	Bacteria	Bacteroidetes	.	Bacteroidia	.	Bacteroidales	.	Bacteroidaceae	.	Bacteroides	.	1	Bacteroides_cellulosilyticus_strain_JCM_15632_(NR_112933.1)	100	3	11	28	52	91	7	4	5	0	9	8	37	41	0	0	0	0	6	5	10	3	0	0	19	26	0	0	0	0	9	32	6	4
OTU_42	417	Root	Bacteria	Firmicutes	.	Clostridia	.	Clostridiales	.	Peptostreptococcaceae	.	Romboutsia	.	0.96	Romboutsia_timonensis_strain_DR1_(NR_144740.1)	100	1	0	0	9	13	7	0	30	24	0	3	3	0	0	0	9	2	0	0	0	0	29	25	8	12	38	23	0	0	0	0	26	24
OTU_41	408	Root	Bacteria	Bacteroidetes	.	Bacteroidia	.	Bacteroidales	.	.	.	.	.	0.58	*	0	1	0	0	0	0	0	0	0	0	0	0	0	0	98	102	0	0	45	48	69	45	0	0	0	0	0	0	0	0	0	0	0	0
OTU_61	385	Root	Bacteria	Firmicutes	.	Clostridia	.	Clostridiales	.	Lachnospiraceae	.	Clostridium XlVa	.	0.55	Lachnospira_pectinoschiza_strain_150-1_(NR_118667.1)	100	1	22	20	58	47	24	10	14	11	0	1	9	6	5	14	0	0	1	0	3	0	17	15	0	3	5	14	11	16	0	0	0	0
OTU_43	381	Root	Bacteria	Bacteroidetes	.	Bacteroidia	.	Bacteroidales	.	Prevotellaceae	.	Prevotella	.	0.99	Prevotella_oris_strain_ATCC_33573_(L16474)	91.3	1	0	0	0	0	0	0	0	0	0	0	0	0	0	0	0	0	0	0	0	0	0	0	0	0	0	0	0	0	0	0	0	0
OTU_54	379	Root	Bacteria	Firmicutes	.	Clostridia	.	Clostridiales	.	Ruminococcaceae	.	Ruminococcus	.	0.74	Ruminococcus_bromii_(T)_ATCC_27255_(L76600)	98.4	1	0	7	0	0	0	0	0	3	0	0	0	0	20	27	3	5	59	48	75	50	0	0	0	0	0	0	0	0	0	0	36	31
OTU_91	369	Root	Bacteria	Bacteroidetes	.	Bacteroidia	.	Bacteroidales	.	Bacteroidaceae	.	Bacteroides	.	1	Bacteroides_eggerthii_(T)_DSM_20697T_(AB050107)	100	1	22	55	0	4	40	34	86	63	0	0	0	0	0	0	0	0	0	0	0	0	0	0	0	0	0	0	0	0	0	0	0	0
OTU_48	368	Root	Bacteria	Firmicutes	.	Clostridia	.	Clostridiales	.	Lachnospiraceae	.	Dorea	.	0.98	Dorea_longicatena_(T)_III-35_(AJ132842)	99.6	1	4	0	7	6	0	7	22	53	7	5	11	5	15	5	0	1	4	3	6	7	0	0	0	0	0	0	0	0	0	0	11	5
OTU_89	361	Root	Bacteria	Firmicutes	.	Clostridia	.	Clostridiales	.	Lachnospiraceae	.	Fusicatenibacter	.	0.58	Fusicatenibacter_saccharivorans_HT03-11_(AB698910)	96.4	1	36	33	23	21	31	13	12	26	16	6	17	11	3	14	0	0	0	0	2	5	0	0	28	28	0	0	0	0	18	0	6	3
OTU_78	361	Root	Bacteria	Firmicutes	.	Clostridia	.	Clostridiales	.	Lachnospiraceae	.	Coprococcus	.	1	Coprococcus_eutactus_(T)_ATCC_27759_(EF031543)	99.6	1	0	0	0	0	0	0	0	0	0	3	23	12	150	137	0	0	6	6	14	5	0	0	0	0	0	0	0	0	0	0	0	0
OTU_50	356	Root	Bacteria	Bacteroidetes	.	Bacteroidia	.	Bacteroidales	.	Bacteroidaceae	.	Bacteroides	.	1	Bacteroides_nordii_(T)_WAL_11050_(AY608697)	99.6	1	0	0	0	0	0	0	0	0	0	0	0	0	0	0	0	0	0	0	0	0	0	0	14	11	0	0	0	0	19	10	0	0
OTU_45	331	Root	Bacteria	Bacteroidetes	.	Bacteroidia	.	Bacteroidales	.	Prevotellaceae	.	Prevotella	.	1	Massiliprevotella_massiliensis_strain_Marseille-P2439_(NR_147404.1)	100	1	0	0	0	0	0	0	0	0	0	0	0	0	40	43	0	0	54	64	84	46	0	0	0	0	0	0	0	0	0	0	0	0
OTU_57	331	Root	Bacteria	Firmicutes	.	Clostridia	.	Clostridiales	.	Ruminococcaceae	.	Clostridium IV	.	0.6	Sporobacter_termitidis_(T)_SYR_(Z49863)	94.1	1	0	0	6	8	0	0	0	0	0	0	0	0	17	15	0	0	11	0	0	1	0	0	101	83	0	0	0	0	32	37	0	0
OTU_66	324	Root	Bacteria	Firmicutes	.	Clostridia	.	Clostridiales	.	Lachnospiraceae	.	.	.	1	Clostridium_herbivorans_(T)_54408_(L34418)	95.7	1	0	0	0	0	0	0	0	0	0	0	0	0	0	0	0	0	0	0	0	0	0	0	0	0	0	0	0	0	0	0	0	0
OTU_47	323	Root	Bacteria	Coriobacteriia	.	Actinobacteria	Coriobacteridae	Coriobacteriales	Coriobacterineae	Coriobacteriaceae	.	Collinsella	.	1	Collinsella_aerofaciens_strain_JCM_10188_(NR_113316.1)	100	1	0	5	12	10	9	0	49	54	7	0	12	11	11	0	5	0	17	14	16	14	0	0	0	0	0	0	0	0	0	0	28	22
OTU_87	319	Root	Bacteria	Proteobacteria	.	Betaproteobacteria	.	Burkholderiales	.	.	.	.	.	0.69	Duodenibacillus_massiliensis_strain_Marseille-P2968_(NR_147381.1)	100	1	3	6	18	28	0	0	0	0	19	17	16	21	0	0	0	0	0	0	0	0	0	0	0	0	0	0	0	0	0	0	8	6
OTU_83	318	Root	Bacteria	Firmicutes	.	Clostridia	.	Clostridiales	.	Ruminococcaceae	.	Oscillibacter	.	0.98	Oscillibacter_sp._GH1_(JF750939)	92.9	1	17	15	0	8	16	11	0	0	0	0	42	43	36	25	0	0	14	11	26	21	0	0	0	0	0	0	0	0	0	0	0	5
OTU_53	316	Root	Bacteria	Bacteroidetes	.	Bacteroidia	.	Bacteroidales	.	Bacteroidaceae	.	Bacteroides	.	1	Bacteroides_coprophilus_(T)_CB42_(=_JCM_13818,_=_DSM_18228)_(AB260026)	100	1	35	27	76	83	24	0	0	0	0	0	0	0	0	0	6	14	0	0	0	0	0	0	0	0	0	0	0	0	0	0	0	0
OTU_52	314	Root	Bacteria	Firmicutes	.	Clostridia	.	Clostridiales	.	Lachnospiraceae	.	Lachnospiracea_incertae_sedis	.	0.68	Eubacterium_eligens_(T)_(L34420)	94.1	1	5	11	29	6	8	6	31	21	2	0	17	9	9	7	10	8	19	12	14	11	0	0	4	0	0	0	0	0	0	0	0	0
OTU_55	314	Root	Bacteria	Firmicutes	.	Clostridia	.	Clostridiales	.	Ruminococcaceae	.	.	.	0.63	Clostridium_stercorarium_(T)_DSM_8532T_(AJ310082)	89.7	4	9	2	0	6	7	13	14	24	19	16	7	3	7	7	0	7	0	0	0	0	0	0	0	0	0	0	0	0	0	0	17	11
OTU_74	307	Root	Bacteria	Firmicutes	.	Clostridia	.	Clostridiales	.	Ruminococcaceae	.	Faecalibacterium	.	0.77	Faecalibacterium_prausnitzii_(T)_ATCC_27768_(AJ413954)	95.7	1	14	17	0	0	12	15	23	18	2	7	22	10	17	12	12	5	15	0	2	14	0	0	5	3	0	0	0	0	0	0	35	18
OTU_60	301	Root	Bacteria	Firmicutes	.	Clostridia	.	Clostridiales	.	Lachnospiraceae	.	.	.	1	Clostridium_sp._UB-B.2_(HE603919)	96	1	0	0	0	0	0	0	0	0	0	0	0	0	0	0	0	0	0	0	0	0	0	0	85	86	0	0	0	0	55	50	0	0
OTU_71	299	Root	Bacteria	Firmicutes	.	Bacilli	.	Lactobacillales	.	Streptococcaceae	.	Streptococcus	.	1	Streptococcus_salivarius_(T)_ATCC_7073_(AY188352)	100	3	8	12	0	0	0	0	0	0	3	0	0	0	0	0	6	11	15	0	15	12	0	0	0	0	0	0	23	22	0	0	12	7
OTU_56	297	Root	Bacteria	Firmicutes	.	Clostridia	.	Clostridiales	.	Lachnospiraceae	.	.	.	1	Ruminococcus_lactaris_(T)_ATCC_29176_(L76602)	96.4	1	0	6	0	0	12	20	43	59	0	0	0	0	3	4	10	24	8	20	19	17	0	0	2	5	0	0	0	0	0	0	0	0
OTU_62	277	Root	Bacteria	Firmicutes	.	Clostridia	.	Clostridiales	.	Lachnospiraceae	.	Lachnospiracea_incertae_sedis	.	0.98	Eubacterium_ventriosum_strain_ATCC_27560_(L34421)	100	1	19	18	7	9	29	24	37	39	10	10	6	9	0	0	0	0	0	0	0	3	0	0	0	0	0	0	0	0	0	0	10	12
OTU_72	276	Root	Bacteria	Firmicutes	.	Clostridia	.	Clostridiales	.	Lachnospiraceae	.	Lachnospiracea_incertae_sedis	.	0.92	Eubacterium_hallii_strain_ATCC_27751_(L34621)	100	1	3	0	8	10	0	5	15	19	5	7	25	24	0	1	10	8	8	9	22	17	0	0	0	0	0	0	0	0	0	0	11	9
OTU_191	272	Root	Bacteria	Bacteroidetes	.	Bacteroidia	.	Bacteroidales	.	Bacteroidaceae	.	Bacteroides	.	0.99	Bacteroides_ovatus_strain_JCM5824_(NR_116181.1)	97.6	2	0	0	0	0	0	41	0	0	0	5	1	0	0	0	0	0	0	0	0	0	74	0	0	0	0	76	0	0	0	0	0	0
OTU_64	261	Root	Bacteria	Firmicutes	.	Clostridia	.	Clostridiales	.	Lachnospiraceae	.	Coprococcus	.	1	Coprococcus_catus_(T)_VPI-C6-61_(AB038359)	99.6	1	0	0	8	6	1	2	25	28	4	0	14	1	0	0	0	0	9	13	9	4	0	0	0	0	0	0	0	0	0	0	17	0
OTU_63	259	Root	Bacteria	Firmicutes	.	Clostridia	.	Clostridiales	.	Lachnospiraceae	.	.	.	0.99	Clostridium_saccharolyticum_(T)_DSM_2544_(Y18185)	95.7	7	0	0	0	0	0	0	0	0	0	0	0	0	0	0	0	0	5	0	0	0	0	0	0	0	0	0	127	127	0	0	0	0
OTU_67	257	Root	Bacteria	Firmicutes	.	Clostridia	.	Clostridiales	.	Lachnospiraceae	.	Blautia	.	1	Blautia_faecis_(T)_M25_(HM626178)	100	1	11	13	32	19	18	23	60	20	0	0	4	12	0	0	0	0	0	0	0	0	0	0	0	0	0	0	0	0	0	0	4	17
OTU_65	244	Root	Bacteria	Firmicutes	.	Clostridia	.	Clostridiales	.	Lachnospiraceae	.	Clostridium XlVa	.	0.78	Clostridium_sp._UB-B.2_(HE603919)	97.2	1	3	1	10	11	0	0	43	34	1	5	8	1	3	6	3	3	0	4	2	5	0	0	0	0	0	0	0	0	0	0	4	0
OTU_68	236	Root	Bacteria	Firmicutes	.	Negativicutes	.	Selenomonadales	.	Veillonellaceae	.	Dialister	.	0.97	Dialister_pneumosintes_(T)_ATCC_33048_(X82500)	96.4	2	0	0	0	0	0	0	0	0	0	0	0	0	0	0	37	37	3	4	7	0	0	0	0	0	0	0	0	0	0	0	0	0
OTU_75	227	Root	Bacteria	Firmicutes	.	Clostridia	.	Clostridiales	.	Lachnospiraceae	.	.	.	0.89	Acetivibrio_ethanolgignens_type_strain:_DSM_3005_(FR749897)	96	3	0	0	0	0	0	0	0	0	0	0	0	0	31	58	10	12	21	16	27	15	0	0	0	0	0	0	0	0	0	0	0	0
OTU_79	225	Root	Bacteria	Proteobacteria	.	Betaproteobacteria	.	Burkholderiales	.	Sutterellaceae	.	Sutterella	.	1	Sutterella_massiliensis_strain_Marseille-P2435_(NR_147401.1)	100	2	0	0	0	2	0	0	122	101	0	0	0	0	0	0	0	0	0	0	0	0	0	0	0	0	0	0	0	0	0	0	0	0
OTU_140	213	Root	Bacteria	Firmicutes	.	Clostridia	.	Clostridiales	.	Lachnospiraceae	.	.	.	1	Anaerobium_acetethylicum_strain_GluBS11_(NR_137405.1)	96	1	51	51	0	0	60	51	0	0	0	0	0	0	0	0	0	0	0	0	0	0	0	0	0	0	0	0	0	0	0	0	0	0
OTU_70	208	Root	Bacteria	Firmicutes	.	Negativicutes	.	Selenomonadales	.	Veillonellaceae	.	Megasphaera	.	1	Megasphaera_elsdenii_strain_DSM_20460_(NR_102980.1)	100	1	0	0	0	0	0	0	0	0	0	0	0	0	0	0	0	2	0	0	0	0	0	0	0	0	0	0	0	0	0	0	0	0
OTU_97	199	Root	Bacteria	Bacteroidetes	.	Bacteroidia	.	Bacteroidales	.	Porphyromonadaceae	.	Butyricimonas	.	1	Butyricimonas_paravirosa_214-4_(AB916502)	98	2	0	0	0	2	0	0	0	0	18	18	69	54	0	6	0	0	4	7	8	7	0	0	0	0	0	0	0	0	0	3	0	3
OTU_90	187	Root	Bacteria	Firmicutes	.	Clostridia	.	Clostridiales	.	Peptostreptococcaceae	.	Intestinibacter	.	0.88	Clostridium_bartlettii_(T)_WAL_16138_(AY438672)	100	1	0	0	0	0	0	0	0	0	0	0	0	0	0	0	4	7	0	0	0	0	0	0	7	5	0	0	57	42	0	0	6	10
OTU_77	184	Root	Bacteria	Proteobacteria	.	Alphaproteobacteria	.	Rhodospirillales	.	Rhodospirillaceae	.	.	.	0.62	Kiloniella_litopenaei_strain_P1-1_(NR_148331.1)	85.8	1	0	0	0	0	0	0	0	0	40	37	30	27	0	0	0	0	0	0	0	0	0	0	19	10	0	0	0	0	14	7	0	0
OTU_80	179	Root	Bacteria	Firmicutes	.	Erysipelotrichia	.	Erysipelotrichales	.	Erysipelotrichaceae	.	Catenibacterium	.	0.84	Catenibacterium_mitsuokai_(T)_JCM_10609_(AB030224)	96.4	1	0	0	0	0	0	0	0	0	0	0	0	0	0	0	0	0	0	0	0	0	0	0	0	0	0	0	0	0	0	0	17	20
OTU_81	175	Root	Bacteria	Firmicutes	.	Clostridia	.	Clostridiales	.	Ruminococcaceae	.	Butyricicoccus	.	0.9	Eubacterium_desmolans_strain_ATCC_43058_(L34618)	99.6	1	0	0	0	0	3	0	53	43	0	0	0	0	0	0	16	10	0	5	5	0	0	0	0	0	0	0	0	0	0	0	0	0
OTU_108	173	Root	Bacteria	Firmicutes	.	Clostridia	.	Clostridiales	.	Lachnospiraceae	.	Blautia	.	1	Blautia_stercoris_GAM6-1_(HM626177)	100	1	0	0	0	0	0	0	0	0	0	0	0	0	0	0	2	0	0	0	0	0	0	0	5	11	3	0	27	27	0	0	0	0
OTU_154	170	Root	Bacteria	Firmicutes	.	Clostridia	.	Clostridiales	.	Lachnospiraceae	.	Lachnospiracea_incertae_sedis	.	0.71	Eubacterium_xylanophilum_strain_ATCC_35991_(L34628)	98.4	1	12	8	32	92	5	17	0	0	0	0	0	0	4	0	0	0	0	0	0	0	0	0	0	0	0	0	0	0	0	0	0	0
OTU_86	165	Root	Bacteria	Firmicutes	.	Clostridia	.	Clostridiales	.	Lachnospiraceae	.	Lachnospiracea_incertae_sedis	.	0.81	Eubacterium_xylanophilum_strain_ATCC_35991_(L34628)	97.6	1	20	19	0	0	16	17	0	0	15	15	19	20	12	12	0	0	0	0	0	0	0	0	0	0	0	0	0	0	0	0	0	0
OTU_237	163	Root	Bacteria	Firmicutes	.	Clostridia	.	Clostridiales	.	Ruminococcaceae	.	Butyricicoccus	.	0.74	Eubacterium_desmolans_strain_ATCC_43058_(L34618)	97.2	1	0	1	0	0	2	4	13	8	9	2	8	4	2	6	0	0	0	0	2	5	0	0	0	0	0	0	0	0	0	0	8	8
OTU_94	162	Root	Bacteria	Firmicutes	.	Clostridia	.	Clostridiales	.	Ruminococcaceae	.	Intestinimonas	.	0.82	Intestinimonas_butyriciproducens_SRB-521-5-I_(KC311367)	96.8	1	0	0	0	0	0	0	0	0	0	0	0	0	0	0	0	0	0	0	0	0	0	0	33	75	0	0	0	0	22	28	0	0
OTU_85	155	Root	Bacteria	Firmicutes	.	Clostridia	.	Clostridiales	.	Lachnospiraceae	.	Lachnospiracea_incertae_sedis	.	0.58	Eubacterium_ruminantium_(T)_GA195_(AB008552)	96.8	1	0	0	0	0	0	0	0	0	0	0	0	0	24	37	18	14	5	0	0	8	0	0	0	0	0	0	0	0	0	0	0	0
OTU_116	152	Root	Bacteria	Firmicutes	.	Clostridia	.	Clostridiales	.	Lachnospiraceae	.	.	.	1	Lachnoclostridium_pacaense_strain_Marseille-P3100_(NR_147396.1)	95.7	1	0	0	0	0	0	0	0	0	0	0	0	0	0	0	0	0	0	0	0	0	0	0	51	48	0	0	0	0	18	33	0	0
OTU_99	147	Root	Bacteria	Proteobacteria	.	Deltaproteobacteria	.	Desulfovibrionales	.	Desulfovibrionaceae	.	Bilophila	.	1	Bilophila_wadsworthia_(T)_7959_(AJ867049)	100	1	0	11	0	6	13	10	30	14	0	0	11	15	0	0	0	0	0	0	0	0	0	0	4	7	0	0	0	0	10	6	8	2
OTU_96	144	Root	Bacteria	Firmicutes	.	Clostridia	.	Clostridiales	.	Lachnospiraceae	.	Clostridium XlVa	.	0.67	Clostridium_methoxybenzovorans_(T)_SR3;_DSM_12182_(AF067965)	97.2	2	0	2	3	7	0	2	7	2	0	3	5	4	8	6	5	8	0	4	1	4	0	2	0	0	0	0	0	0	0	0	0	0
OTU_92	143	Root	Bacteria	Firmicutes	.	Clostridia	.	Clostridiales	.	Ruminococcaceae	.	Ruminococcus	.	0.78	Ruminococcus_champanellensis_18P13_type_strain:_18P13_(AJ515913)	96	1	0	0	0	0	0	0	0	0	0	0	0	0	0	0	0	0	0	0	0	0	0	0	35	34	0	0	0	0	31	34	0	0
OTU_88	140	Root	Bacteria	Firmicutes	.	Clostridia	.	Clostridiales	.	Lachnospiraceae	.	Ruminococcus2	.	0.87	Ruminococcus_lactaris_(T)_ATCC_29176_(L76602)	100	1	3	5	6	9	0	0	0	0	12	7	22	15	5	0	0	0	0	0	8	0	0	0	6	1	0	0	0	0	0	0	0	0
OTU_193	133	Root	Bacteria	Firmicutes	.	Clostridia	.	Clostridiales	.	Ruminococcaceae	.	Ruminococcus	.	1	Ruminococcus_champanellensis_18P13_type_strain:_18P13_(AJ515913)	98.8	1	0	0	0	0	0	0	0	0	16	25	47	32	0	0	0	0	0	0	0	0	0	0	7	0	0	0	0	0	0	6	0	0
OTU_95	130	Root	Bacteria	Firmicutes	.	Clostridia	.	Clostridiales	.	Ruminococcaceae	.	.	.	0.89	Ruminococcus_bromii_(T)_ATCC_27255_(L76600)	94.9	1	7	0	52	38	2	5	0	0	0	10	10	6	0	0	0	0	0	0	0	0	0	0	0	0	0	0	0	0	0	0	0	0
OTU_101	128	Root	Bacteria	Firmicutes	.	Clostridia	.	Clostridiales	.	Ruminococcaceae	.	Sporobacter	.	0.54	Flintibacter_butyricus_strain_BLS21_(NR_144611.1)	92.5	2	18	18	6	8	0	8	0	0	4	7	0	23	10	8	0	0	1	0	0	15	0	0	0	0	0	0	0	0	0	0	0	0
OTU_93	126	Root	Bacteria	Firmicutes	.	Negativicutes	.	Selenomonadales	.	Veillonellaceae	.	Veillonella	.	1	Veillonella_ratti_strain_JCM_6512_(NR_113377.1)	100	3	0	0	0	0	0	0	0	0	0	0	0	0	0	0	0	0	0	0	0	0	27	34	0	0	34	29	2	0	0	0	0	0
OTU_123	126	Root	Bacteria	Firmicutes	.	Clostridia	.	Clostridiales	.	.	.	.	.	0.92	Clostridium_jejuense_(T)_HY-35-12_(AY494606)	88.5	1	0	0	0	0	0	0	0	0	0	0	0	0	0	0	0	0	0	0	0	0	0	0	39	49	0	0	0	0	17	18	0	0
OTU_114	126	Root	Bacteria	Bacteroidetes	.	Bacteroidia	.	Bacteroidales	.	Bacteroidaceae	.	Bacteroides	.	1	Bacteroides_mediterraneensis_strain_Marseille-P2644_(NR_144744.1)	99.2	1	0	0	0	0	0	0	0	0	0	0	0	0	0	0	0	0	0	0	0	0	0	0	0	0	0	0	0	0	0	0	0	0
OTU_100	119	Root	Bacteria	Proteobacteria	.	Betaproteobacteria	.	Burkholderiales	.	Sutterellaceae	.	Parasutterella	.	1	Parasutterella_excrementihominis_(T)_YIT_11859_(=_JCM_15078,_=_DSM_21040)_(AB370250)	100	1	18	19	4	6	0	0	0	0	0	0	0	0	0	0	0	0	0	0	0	0	0	0	0	5	0	0	0	0	0	0	0	0
OTU_104	117	Root	Bacteria	Firmicutes	.	Clostridia	.	Clostridiales	.	Ruminococcaceae	.	Flavonifractor	.	1	Flavonifractor_plautii_(T)_CCUG_28093;_ATCC_29863_(AY724678)	100	1	0	0	0	0	6	0	15	13	0	0	0	0	0	0	2	0	0	0	0	0	0	0	0	0	1	0	16	21	0	0	0	0
OTU_109	116	Root	Bacteria	Firmicutes	.	Clostridia	.	Clostridiales	.	Lachnospiraceae	.	Clostridium XlVb	.	0.98	Clostridium_lactatifermentans_(T)_G17_(AY033434)	95.7	1	6	10	0	7	11	9	0	0	0	3	3	6	0	0	6	0	2	0	4	0	0	0	0	0	0	0	0	0	0	0	13	17
OTU_165	113	Root	Bacteria	Firmicutes	.	Clostridia	.	Clostridiales	.	Lachnospiraceae	.	Clostridium XlVa	.	0.96	Clostridium_lavalense_(T)_CCRI-9842_(EF564277)	99.2	2	0	0	0	0	0	0	0	0	0	0	0	0	0	0	0	0	0	0	0	0	0	0	52	23	0	0	0	38	0	0	0	0
OTU_105	113	Root	Bacteria	Firmicutes	.	Clostridia	.	Clostridiales	.	Lachnospiraceae	.	Blautia	.	1	Blautia_obeum_(T)_(X85101)	100	1	10	8	1	3	10	11	0	2	6	5	10	10	10	4	0	9	0	0	0	5	0	0	0	0	0	0	0	0	0	0	0	4
OTU_98	112	Root	Bacteria	Verrucomicrobia	.	Verrucomicrobiae	.	Verrucomicrobiales	.	Verrucomicrobiaceae	.	Akkermansia	.	1	Akkermansia_muciniphila_(T)_Muc_(AY271254)	100	1	0	0	5	7	0	0	0	0	0	0	0	0	0	0	0	0	0	0	0	0	0	0	49	26	0	0	0	0	15	7	0	0
OTU_103	108	Root	Bacteria	Firmicutes	.	Clostridia	.	Clostridiales	.	Ruminococcaceae	.	.	.	0.94	Eubacterium_coprostanoligenes_(T)_HL_(HM037995)	91.3	1	3	4	0	0	0	0	0	0	0	0	0	0	38	34	0	0	4	4	3	8	0	0	0	0	0	0	0	0	0	0	0	0
OTU_243	107	Root	Bacteria	Firmicutes	.	Clostridia	.	Clostridiales	.	Lachnospiraceae	.	.	.	1	Blautia_caecimuris_strain_SJ18_(NR_144607.1)	98.8	1	0	0	0	0	0	0	0	0	0	0	0	0	0	0	0	0	0	0	0	0	11	0	0	0	8	10	41	33	0	0	0	0
OTU_124	106	Root	Bacteria	Firmicutes	.	Clostridia	.	Clostridiales	.	Lachnospiraceae	.	.	.	1	Drancourtella_massiliensis_strain_GD1_(NR_144722.1)	96.8	1	0	0	0	0	0	0	0	0	0	0	0	0	0	0	0	0	0	0	0	0	0	0	0	0	0	0	70	36	0	0	0	0
OTU_106	106	Root	Bacteria	Firmicutes	.	Clostridia	.	Clostridiales	.	Ruminococcaceae	.	Clostridium IV	.	0.84	Eubacterium_siraeum_strain_ATCC_29066_(L34625)	94.9	1	15	11	38	32	10	0	0	0	0	0	0	0	0	0	0	0	0	0	0	0	0	0	0	0	0	0	0	0	0	0	0	0
OTU_102	104	Root	Bacteria	Firmicutes	.	Clostridia	.	Clostridiales	.	Lachnospiraceae	.	.	.	0.98	Blautia_schinkii_(T)_Bie_41_(X94964)	94.5	3	0	0	0	0	0	0	0	0	0	0	0	0	0	0	0	0	0	0	0	0	0	0	19	17	0	0	0	0	41	26	0	0
OTU_107	103	Root	Bacteria	Firmicutes	.	Clostridia	.	Clostridiales	.	.	.	.	.	0.89	Vallitalea_pronyensis_FatNI3_(KC876639)	90.1	1	6	3	34	54	3	3	0	0	0	0	0	0	0	0	0	0	0	0	0	0	0	0	0	0	0	0	0	0	0	0	0	0
OTU_111	102	Root	Bacteria	Firmicutes	.	Clostridia	.	Clostridiales	.	Ruminococcaceae	.	.	.	0.86	Flintibacter_butyricus_strain_BLS21_(NR_144611.1)	96.8	1	8	5	6	0	16	3	0	0	0	0	20	3	7	0	0	0	5	6	3	5	0	0	0	0	0	0	0	0	0	0	10	5
OTU_110	97	Root	Bacteria	Firmicutes	.	Erysipelotrichia	.	Erysipelotrichales	.	Erysipelotrichaceae	.	Turicibacter	.	1	Turicibacter_sanguinis_(T)_(AF349724)	99.6	1	0	0	0	0	0	0	0	0	0	0	0	0	0	0	19	19	0	0	0	0	0	0	0	0	0	0	0	0	0	0	9	7
OTU_112	95	Root	Bacteria	Bacteroidetes	.	Bacteroidia	.	Bacteroidales	.	Rikenellaceae	.	Alistipes	.	0.98	Alistipes_obesi_strain_ph8_(NR_133025.1)	100	1	7	14	6	2	0	5	0	0	6	4	7	12	0	0	0	0	12	3	5	7	0	0	0	0	0	0	0	0	0	0	0	0
OTU_265	92	Root	Bacteria	Firmicutes	.	Clostridia	.	Clostridiales	.	Lachnospiraceae	.	Clostridium XlVa	.	0.75	Clostridium_methoxybenzovorans_(T)_SR3;_DSM_12182_(AF067965)	96.8	2	0	1	3	0	0	5	21	30	4	2	0	0	3	0	0	0	12	0	2	0	0	0	0	0	0	0	0	0	0	0	4	0
OTU_118	91	Root	Bacteria	Firmicutes	.	Clostridia	.	Clostridiales	.	.	.	.	.	0.9	Anaerobacterium_chartisolvens_T-1-35_(AB793710)	87.4	1	0	0	0	0	0	0	0	0	5	0	6	5	0	0	9	19	0	0	0	0	0	0	0	0	0	0	0	0	0	0	0	0
OTU_134	90	Root	Bacteria	Firmicutes	.	Clostridia	.	Clostridiales	.	Lachnospiraceae	.	Clostridium XlVa	.	0.63	Clostridium_saccharolyticum_(T)_DSM_2544_(Y18185)	97.2	1	0	0	0	0	0	0	0	0	0	0	0	0	0	0	0	0	0	0	0	0	0	0	29	45	0	0	0	0	10	6	0	0
OTU_259	89	Root	Bacteria	Firmicutes	.	Clostridia	.	Clostridiales	.	Lachnospiraceae	.	Clostridium XlVa	.	0.5	Clostridium_bolteae_(T)_type_strain:_16351_(AJ508452)	96.8	1	0	0	0	0	0	0	12	11	0	0	0	0	0	0	0	0	0	0	0	0	17	11	0	0	11	16	0	4	0	0	0	0
OTU_157	88	Root	Bacteria	Firmicutes	.	Clostridia	.	Clostridiales	.	Ruminococcaceae	.	Clostridium IV	.	0.54	Clostridium_thermocellum_(T)_ATCC_27405_(CP000568)	92.1	9	0	0	0	0	0	0	0	0	0	0	0	0	0	0	0	0	0	0	0	0	0	0	43	27	0	0	0	0	11	4	0	0
OTU_113	88	Root	Bacteria	Bacteroidetes	.	Bacteroidia	.	Bacteroidales	.	Porphyromonadaceae	.	.	.	0.74	Muribaculum_intestinale_strain_YL27_(NR_144616.1)	87.3	1	0	0	0	0	0	0	0	0	0	0	0	0	0	0	0	0	0	0	0	0	0	0	0	0	0	0	0	0	0	0	0	0
OTU_115	81	Root	Archaea	Euryarchaeota	.	Methanobacteria	.	Methanobacteriales	.	Methanobacteriaceae	.	Methanobrevibacter	.	1	Methanobrevibacter_smithii_strain_PS_(NR_074235.1)	100	2	0	0	0	0	0	0	0	0	0	0	0	0	0	0	0	0	0	0	0	0	0	0	16	9	0	0	0	0	21	35	0	0
OTU_117	80	Root	Bacteria	Firmicutes	.	Clostridia	.	Clostridiales	.	Ruminococcaceae	.	.	.	0.66	Eubacterium_coprostanoligenes_(T)_HL_(HM037995)	93.7	1	0	0	0	0	0	0	0	0	0	0	0	0	12	6	0	0	8	12	24	18	0	0	0	0	0	0	0	0	0	0	0	0
OTU_122	77	Root	Bacteria	Bacteroidetes	.	Bacteroidia	.	Bacteroidales	.	Prevotellaceae	.	Alloprevotella	.	0.72	Alloprevotella_rava_(T)_81/4-12_(JQ039189)	92.9	1	14	8	24	25	6	0	0	0	0	0	0	0	0	0	0	0	0	0	0	0	0	0	0	0	0	0	0	0	0	0	0	0
OTU_158	76	Root	Bacteria	Firmicutes	.	Clostridia	.	Clostridiales	.	Ruminococcaceae	.	Pseudoflavonifractor	.	0.53	Pseudoflavonifractor_phocaeensis_strain_Marseille-P3064_(NR_147370.1)	97.2	1	0	7	0	0	2	3	6	3	0	0	1	0	0	0	0	0	0	0	0	0	0	0	22	23	0	0	0	0	0	1	0	0
OTU_143	73	Root	Bacteria	Firmicutes	.	Clostridia	.	Clostridiales	.	Ruminococcaceae	.	Ruminococcus	.	1	Ruminococcus_callidus_(T)_ATCC_27760_(L76596)	100	1	0	0	0	0	0	0	0	0	0	0	0	0	0	6	3	4	9	3	17	8	0	0	0	0	0	0	0	0	0	0	0	0
OTU_121	73	Root	Bacteria	Proteobacteria	.	Alphaproteobacteria	.	Rhodospirillales	.	Rhodospirillaceae	.	.	.	0.68	*	0	1	12	7	22	24	0	8	0	0	0	0	0	0	0	0	0	0	0	0	0	0	0	0	0	0	0	0	0	0	0	0	0	0
OTU_119	73	Root	Bacteria	Firmicutes	.	.	.	.	.	.	.	.	.	0.83	Thermoactinomycetaceae_bacterium_R4S8_(KJ206288)	86.6	1	0	0	0	0	0	0	0	0	0	0	0	0	0	0	0	0	0	0	0	0	0	0	13	13	0	0	0	0	24	23	0	0
OTU_120	72	Root	Bacteria	Firmicutes	.	Clostridia	.	Clostridiales	.	Lachnospiraceae	.	Anaerostipes	.	1	Anaerostipes_caccae_(T)_L1-92_(AJ270487)	100	1	0	0	0	0	0	0	0	0	0	0	0	0	0	0	0	0	0	0	0	0	0	0	0	0	0	0	45	27	0	0	0	0
OTU_136	71	Root	Bacteria	Firmicutes	.	Clostridia	.	Clostridiales	.	Ruminococcaceae	.	Clostridium IV	.	0.62	Clostridium_methylpentosum_(T)_DSM_5476_(Y18181)	89.7	3	0	0	0	0	0	0	0	0	0	0	0	0	0	0	0	0	0	0	0	0	0	0	0	0	0	0	0	0	0	0	35	36
OTU_128	71	Root	Bacteria	Firmicutes	.	Negativicutes	.	Selenomonadales	.	Acidaminococcaceae	.	Phascolarctobacterium	.	0.61	Phascolarctobacterium_faecium_(T)_(X72865)	96	1	10	9	24	23	0	5	0	0	0	0	0	0	0	0	0	0	0	0	0	0	0	0	0	0	0	0	0	0	0	0	0	0
OTU_126	70	Root	Bacteria	Proteobacteria	.	Gammaproteobacteria	.	Enterobacteriales	.	Enterobacteriaceae	.	Escherichia/Shigella	.	0.79	Shigella_sonnei_type_strain:_CECT_4887_(FR870445)	100	5	0	0	0	0	0	0	0	0	0	0	0	0	0	0	0	0	0	0	0	0	0	0	23	19	0	0	0	0	9	11	0	0
OTU_125	69	Root	Bacteria	Firmicutes	.	Clostridia	.	Clostridiales	.	Clostridiaceae 1	.	Clostridium sensu stricto	.	0.96	Clostridium_saudiense_strain_JCC_(NR_144696.1)	97.2	2	0	0	0	0	0	0	15	17	0	4	0	0	0	0	0	0	0	0	0	0	0	0	0	0	0	0	0	0	0	0	0	0
OTU_129	69	Root	Bacteria	Firmicutes	.	Clostridia	.	Clostridiales	.	Ruminococcaceae	.	Ruminococcus	.	0.99	Ruminococcus_champanellensis_18P13_type_strain:_18P13_(AJ515913)	94.1	1	5	9	29	24	2	0	0	0	0	0	0	0	0	0	0	0	0	0	0	0	0	0	0	0	0	0	0	0	0	0	0	0
OTU_187	68	Root	Bacteria	Firmicutes	.	Clostridia	.	Clostridiales	.	Lachnospiraceae	.	.	.	0.96	Clostridium_sp._UB-B.2_(HE603919)	95.7	2	2	6	0	5	10	11	4	4	7	0	4	0	6	2	0	0	2	2	0	0	0	0	0	0	0	0	0	0	0	0	0	0
OTU_127	67	Root	Bacteria	Firmicutes	.	Clostridia	.	Clostridiales	.	Lachnospiraceae	.	Clostridium XlVa	.	0.84	Clostridium_nexile_(T)_DSM_1787_(X73443)	98.8	1	0	0	0	0	0	0	0	0	0	0	0	0	0	0	0	0	0	0	0	0	14	13	0	0	21	9	0	0	0	0	0	0
OTU_139	65	Root	Bacteria	Firmicutes	.	Clostridia	.	Clostridiales	.	.	.	.	.	0.73	Alkalibacter_saccharofermentans_(T)_Z-79820_(AY312403)	87	1	0	0	0	0	0	0	0	0	0	0	0	0	0	0	0	0	0	0	0	0	0	0	18	12	0	0	0	0	15	20	0	0
OTU_132	64	Root	Bacteria	Firmicutes	.	Clostridia	.	Clostridiales	.	Ruminococcaceae	.	Oscillibacter	.	0.99	Oscillibacter_sp._GH1_(JF750939)	92.9	1	0	0	0	0	0	0	0	0	0	0	12	13	2	7	1	0	0	0	0	2	0	0	0	0	0	0	0	0	0	0	0	0
OTU_131	62	Root	Bacteria	Firmicutes	.	Clostridia	.	Clostridiales	.	.	.	.	.	0.79	Eubacterium_uniforme_(T)_X3C39_(GU269550)	86.2	1	0	0	0	0	0	0	0	0	0	0	0	0	0	0	0	0	0	0	0	0	0	0	23	17	0	0	0	0	13	9	0	0
OTU_130	61	Root	Bacteria	Bacteroidetes	.	Bacteroidia	.	Bacteroidales	.	Porphyromonadaceae	.	Barnesiella	.	0.67	Muribaculum_intestinale_strain_YL27_(NR_144616.1)	88.1	1	0	0	0	0	0	0	0	0	0	0	0	0	0	0	0	0	0	0	0	0	0	0	18	13	0	0	0	0	13	17	0	0
OTU_135	58	Root	Bacteria	Firmicutes	.	Clostridia	.	Clostridiales	.	Lachnospiraceae	.	.	.	1	Clostridium_aerotolerans_(T)_DSM_5434_(X76163)	95.7	6	0	0	0	0	0	0	0	0	0	0	0	0	0	0	0	0	0	0	0	0	0	0	23	22	0	0	0	0	0	13	0	0
OTU_155	58	Root	Bacteria	Firmicutes	.	Clostridia	.	Clostridiales	.	Lachnospiraceae	.	Dorea	.	0.96	Dorea_formicigenerans_strain_ATCC_27755_(L34619)	100	1	0	0	3	0	0	0	5	7	2	0	0	0	2	0	0	0	3	16	3	5	0	0	0	0	0	0	0	0	0	0	2	0
OTU_133	58	Root	Bacteria	Bacteroidetes	.	Bacteroidia	.	Bacteroidales	.	.	.	.	.	0.5	*	0	1	0	0	0	0	0	0	0	0	0	0	0	0	0	0	0	0	0	0	0	0	0	0	0	0	0	0	0	0	0	0	34	24
OTU_137	56	Root	Bacteria	Proteobacteria	.	Deltaproteobacteria	.	.	.	.	.	.	.	0.51	*	0	1	0	0	0	0	0	0	0	0	0	0	0	0	0	0	0	0	0	0	0	0	0	0	19	14	0	0	0	0	14	9	0	0
OTU_146	56	Root	Bacteria	Firmicutes	.	Clostridia	.	.	.	.	.	.	.	0.53	Thermoactinomycetaceae_bacterium_R4S8_(KJ206288)	87.7	2	4	4	7	9	6	6	0	0	0	0	5	0	3	0	0	0	0	3	0	6	0	0	2	0	0	0	0	0	0	1	0	0
OTU_138	55	Root	Bacteria	Firmicutes	.	Clostridia	.	Clostridiales	.	Lachnospiraceae	.	Coprococcus	.	1	Coprococcus_eutactus_(T)_ATCC_27759_(EF031543)	96.8	1	0	0	0	0	0	0	0	0	0	0	0	0	0	0	14	7	0	0	0	0	0	0	0	0	0	0	0	0	0	0	0	0
OTU_144	55	Root	Bacteria	Firmicutes	.	Clostridia	.	Clostridiales	.	.	.	.	.	0.98	Clostridium_putrificum_(T)_DSM_1734_(X73442)	91.3	1	0	0	0	0	0	0	0	0	0	0	0	0	23	16	0	0	0	0	0	0	0	0	9	7	0	0	0	0	0	0	0	0
OTU_141	52	Root	Bacteria	Bacteroidetes	.	Bacteroidia	.	Bacteroidales	.	Porphyromonadaceae	.	Macellibacteroides	.	0.5	Muribaculum_intestinale_strain_YL27_(NR_144616.1)	92.1	1	0	0	0	0	0	0	0	0	0	0	0	0	0	0	0	0	0	0	0	0	0	0	25	20	0	0	0	0	7	0	0	0
OTU_156	52	Root	Bacteria	Firmicutes	.	Clostridia	.	Clostridiales	.	Ruminococcaceae	.	.	.	0.97	Flintibacter_butyricus_strain_BLS21_(NR_144611.1)	93.3	1	0	0	0	4	0	0	0	0	0	0	0	0	0	0	0	0	0	0	0	0	0	0	6	15	0	0	0	0	5	6	3	10
OTU_194	51	Root	Bacteria	Firmicutes	.	Clostridia	.	Clostridiales	.	Ruminococcaceae	.	.	.	0.81	Sporobacter_termitidis_(T)_SYR_(Z49863)	92.5	1	12	5	0	0	0	0	0	0	0	0	2	0	0	0	0	0	5	8	9	10	0	0	0	0	0	0	0	0	0	0	0	0
OTU_142	51	Root	Bacteria	Firmicutes	.	Erysipelotrichia	.	Erysipelotrichales	.	Erysipelotrichaceae	.	Erysipelotrichaceae_incertae_sedis	.	0.58	[Clostridium]_innocuum_strain_B-3_(NR_029164.1)	100	1	0	0	0	0	0	0	0	0	0	0	0	0	0	0	0	0	0	0	0	0	0	0	0	0	0	0	28	23	0	0	0	0
OTU_163	51	Root	Bacteria	Firmicutes	.	Clostridia	.	Clostridiales	.	Lachnospiraceae	.	.	.	1	Syntrophococcus_sucromutans_(T)_S195_(AF202264)	95.3	2	7	4	0	4	10	10	0	0	0	0	3	0	6	2	0	0	1	0	0	0	0	0	0	0	0	0	0	0	0	0	0	0
OTU_147	50	Root	Bacteria	Firmicutes	.	Clostridia	.	Clostridiales	.	Ruminococcaceae	.	Anaerofilum	.	0.71	Anaerofilum_pentosovorans_(T)_Fae;_DSM_7168_(X97852)	94.4	2	0	0	0	0	0	0	0	0	0	0	0	0	0	0	0	0	0	0	0	0	0	0	0	0	0	0	23	27	0	0	0	0
OTU_151	49	Root	Bacteria	Proteobacteria	.	Deltaproteobacteria	.	Bdellovibrionales	.	Bdellovibrionaceae	.	Vampirovibrio	.	0.58	*	0	1	3	5	15	16	4	6	0	0	0	0	0	0	0	0	0	0	0	0	0	0	0	0	0	0	0	0	0	0	0	0	0	0
OTU_184	48	Root	Bacteria	Firmicutes	.	Clostridia	.	Clostridiales	.	Lachnospiraceae	.	Dorea	.	0.61	Mordavella_massiliensis_strain_Marseille-P3246_(NR_147406.1)	95.3	1	0	0	0	0	0	0	10	10	0	0	0	0	0	0	3	1	0	0	0	0	0	0	0	0	0	0	0	0	0	0	0	0
OTU_148	48	Root	Bacteria	Firmicutes	.	Clostridia	.	Clostridiales	.	Lachnospiraceae	.	Lachnospiracea_incertae_sedis	.	0.75	Ruminococcus_gnavus_(T)_ATCC_29149_(X94967)	100	1	0	0	0	0	0	0	7	2	0	0	0	0	0	0	0	0	0	0	0	0	0	4	0	0	3	2	5	3	0	0	0	0
OTU_145	48	Root	Bacteria	Bacteroidetes	.	Bacteroidia	.	Bacteroidales	.	Porphyromonadaceae	.	.	.	0.92	Muribaculum_intestinale_strain_YL27_(NR_144616.1)	91.7	1	0	0	0	0	0	0	0	0	0	0	0	0	0	0	0	0	0	0	0	0	0	0	18	11	0	0	0	0	0	19	0	0
OTU_149	45	Root	Bacteria	Firmicutes	.	Bacilli	.	Lactobacillales	.	Lactobacillaceae	.	Lactobacillus	.	0.98	Lactobacillus_mucosae_(T)_CCUG_43179_(T);_S32;_DSM_13345_(AF126738)	100	1	0	0	0	0	0	0	0	0	0	0	0	0	0	0	0	0	0	0	0	0	0	0	0	0	0	0	0	0	0	0	22	23
OTU_150	45	Root	Bacteria	Firmicutes	.	Clostridia	.	Clostridiales	.	Lachnospiraceae	.	Anaerostipes	.	0.99	Anaerostipes_butyraticus_(T)_35-7_(FJ947528)	97.2	1	0	0	0	0	0	0	0	0	0	0	0	0	0	0	0	0	0	0	0	0	0	0	0	0	0	0	0	0	0	0	28	14
OTU_164	43	Root	Bacteria	Firmicutes	.	Clostridia	.	Clostridiales	.	Lachnospiraceae	.	.	.	1	Clostridium_sp._UB-B.2_(HE603919)	95.7	1	0	0	0	0	0	0	0	0	0	0	0	0	0	0	0	0	0	0	0	0	0	0	17	11	0	0	0	0	6	9	0	0
OTU_152	43	Root	Bacteria	Proteobacteria	.	Gammaproteobacteria	.	Pasteurellales	.	Pasteurellaceae	.	Haemophilus	.	0.69	Haemophilus_parainfluenzae_(T)_CCUG_12836_(AY362908)	100	1	0	0	0	0	0	0	0	0	0	0	0	0	0	0	0	0	0	0	0	0	7	0	0	0	7	3	0	0	0	0	14	12
OTU_153	43	Root	Bacteria	Firmicutes	.	Negativicutes	.	Selenomonadales	.	Veillonellaceae	.	Megasphaera	.	1	Caecibacter_massiliensis_strain_Marseille-P2974_(NR_147376.1)	98	1	0	0	0	0	0	0	0	0	0	8	18	17	0	0	0	0	0	0	0	0	0	0	0	0	0	0	0	0	0	0	0	0
OTU_168	42	Root	Bacteria	Firmicutes	.	Clostridia	.	Clostridiales	.	Ruminococcaceae	.	.	.	0.99	Papillibacter_cinnamivorans_(T)_CIN1;_DSM12816_(AF167711)	95.7	1	0	0	0	0	0	0	0	0	0	0	0	0	0	0	0	0	0	0	0	0	0	0	26	11	0	0	0	0	5	0	0	0
OTU_181	40	Root	Bacteria	Proteobacteria	.	Deltaproteobacteria	.	Desulfovibrionales	.	Desulfovibrionaceae	.	Desulfovibrio	.	1	Desulfovibrio_piger_(T)_ATCC29098_(AF192152)	99.2	1	0	0	0	0	0	0	0	0	5	0	7	7	0	0	0	0	0	0	0	0	0	0	0	6	0	0	0	0	12	3	0	0
OTU_185	37	Root	Bacteria	Firmicutes	.	Negativicutes	.	Selenomonadales	.	Veillonellaceae	.	Veillonella	.	1	Veillonella_dispar_(T)_ATCC_17748_(AF439639)	100	1	0	0	0	0	0	0	0	0	0	0	0	0	0	0	0	0	0	0	0	0	6	0	0	0	2	1	13	12	0	0	0	3
OTU_160	35	Root	Bacteria	Proteobacteria	.	.	.	.	.	.	.	.	.	0.69	Vampirovibrio_chlorellavorus_(T)_ICPB_3707_(HM038000)	85.4	1	0	6	15	14	0	0	0	0	0	0	0	0	0	0	0	0	0	0	0	0	0	0	0	0	0	0	0	0	0	0	0	0
OTU_159	35	Root	Bacteria	Firmicutes	.	Clostridia	.	Clostridiales	.	Ruminococcaceae	.	.	.	0.69	Eubacterium_coprostanoligenes_(T)_HL_(HM037995)	96.8	1	0	0	0	0	0	0	0	0	0	0	0	0	0	0	8	0	0	0	0	0	0	0	0	0	0	0	0	0	0	0	0	0
OTU_161	34	Root	Bacteria	Firmicutes	.	.	.	.	.	.	.	.	.	0.98	Desulfotomaculum_varum_RH04-3_(GU126374)	86.2	1	0	0	0	0	0	0	0	0	0	0	0	0	0	0	0	0	0	0	0	0	0	0	12	7	0	0	0	0	7	8	0	0
OTU_162	34	Root	Bacteria	.	.	.	.	.	.	.	.	.	.	1	Lactobacillus_rossiae_(T)_CS1_(AJ564009)	87	1	0	0	0	0	0	0	0	0	0	0	0	0	0	0	0	0	0	0	0	0	0	0	0	0	0	0	9	8	0	0	8	9
OTU_266	31	Root	Bacteria	Firmicutes	.	Clostridia	.	Clostridiales	.	Clostridiaceae 1	.	Clostridium sensu stricto	.	1	Clostridium_saudiense_strain_JCC_(NR_144696.1)	99.6	2	0	0	0	0	5	11	0	0	0	0	0	0	0	0	0	0	0	0	0	0	0	0	6	9	0	0	0	0	0	0	0	0
OTU_170	30	Root	Bacteria	Firmicutes	.	Clostridia	.	Clostridiales	.	Ruminococcaceae	.	.	.	0.77	Clostridium_cellobioparum_(T)_DSM_1351_(X71856)	89.3	3	0	0	10	16	0	0	0	0	0	0	0	0	0	0	0	0	0	0	0	0	0	0	4	0	0	0	0	0	0	0	0	0
OTU_166	29	Root	Bacteria	Firmicutes	.	Clostridia	.	Clostridiales	.	Clostridiaceae 1	.	Clostridium sensu stricto	.	0.86	Clostridium_cadaveris_(T)_JCM_1392_(AB542932)	100	1	0	0	0	0	0	0	0	0	0	0	0	0	0	0	0	0	0	0	0	0	0	0	0	0	0	0	18	11	0	0	0	0
OTU_167	29	Root	Bacteria	Bacteroidetes	.	Bacteroidia	.	Bacteroidales	.	Bacteroidaceae	.	Bacteroides	.	0.96	Bacteroides_massiliensis_(T)_B84634_(AY126616)	94.9	1	0	0	0	0	0	0	0	0	0	0	0	0	0	0	0	0	0	0	0	0	0	0	0	0	0	0	0	0	0	0	0	0
OTU_195	29	Root	Bacteria	Firmicutes	.	Clostridia	.	Clostridiales	.	Lachnospiraceae	.	.	.	0.99	Cuneatibacter_caecimuris_strain_BARN-424-CC-10_(NR_144608.1)	94.5	1	4	0	0	0	0	0	0	0	0	0	0	0	5	18	0	0	0	0	0	2	0	0	0	0	0	0	0	0	0	0	0	0
OTU_188	28	Root	Bacteria	Firmicutes	.	Clostridia	.	Clostridiales	.	.	.	.	.	0.95	Clostridium_jejuense_(T)_HY-35-12_(AY494606)	88.9	1	0	0	0	0	0	0	0	0	0	0	0	0	12	16	0	0	0	0	0	0	0	0	0	0	0	0	0	0	0	0	0	0
OTU_179	28	Root	Bacteria	Firmicutes	.	.	.	.	.	.	.	.	.	0.88	Papillibacter_cinnamivorans_(T)_CIN1;_DSM12816_(AF167711)	89.7	1	0	0	0	0	0	0	0	0	0	0	0	0	0	0	0	0	0	0	0	0	0	0	11	10	0	0	0	0	5	2	0	0
OTU_169	28	Root	Bacteria	.	.	.	.	.	.	.	.	.	.	1	Breznakia_pachnodae_strain_Pei061_(NR_146687.1)	86.9	1	0	0	0	0	0	0	0	0	12	16	0	0	0	0	0	0	0	0	0	0	0	0	0	0	0	0	0	0	0	0	0	0
OTU_202	27	Root	Bacteria	Firmicutes	.	Clostridia	.	Clostridiales	.	Ruminococcaceae	.	.	.	1	Clostridium_methylpentosum_(T)_DSM_5476_(Y18181)	94.9	1	0	0	0	0	0	0	9	9	0	0	5	4	0	0	0	0	0	0	0	0	0	0	0	0	0	0	0	0	0	0	0	0
OTU_171	27	Root	Bacteria	Bacteroidetes	.	Bacteroidia	.	Bacteroidales	.	Porphyromonadaceae	.	Coprobacter	.	0.82	Coprobacter_fastidiosus_NSB1_(JN703378)	90.9	1	0	6	7	9	0	0	0	0	0	5	0	0	0	0	0	0	0	0	0	0	0	0	0	0	0	0	0	0	0	0	0	0
OTU_173	27	Root	Bacteria	Firmicutes	.	Clostridia	.	Clostridiales	.	Ruminococcaceae	.	.	.	0.73	Flintibacter_butyricus_strain_BLS21_(NR_144611.1)	91.7	1	0	0	0	0	0	0	0	0	0	0	0	0	0	0	0	0	0	0	0	0	0	0	10	10	0	0	0	0	7	0	0	0
OTU_177	26	Root	Bacteria	Firmicutes	.	Clostridia	.	Clostridiales	.	Ruminococcaceae	.	Oscillibacter	.	0.99	Oscillibacter_sp._GH1_(JF750939)	95.3	1	1	0	6	3	7	0	0	5	0	0	0	0	3	1	0	0	0	0	0	0	0	0	0	0	0	0	0	0	0	0	0	0
OTU_174	26	Root	Bacteria	Firmicutes	.	Clostridia	.	Clostridiales	.	.	.	.	.	0.6	Clostridium_tyrobutyricum_strain_ATCC_25755_(M59113)	85.4	2	0	0	0	0	0	0	0	0	0	0	0	0	0	0	0	0	0	0	0	0	0	0	10	12	0	0	0	0	0	4	0	0
OTU_222	25	Root	Bacteria	Firmicutes	.	Clostridia	.	Clostridiales	.	Ruminococcaceae	.	.	.	1	Pseudoflavonifractor_phocaeensis_strain_Marseille-P3064_(NR_147370.1)	95.7	1	0	0	0	0	0	0	0	0	0	0	0	0	0	0	0	0	0	0	0	0	0	0	4	13	0	0	0	0	5	3	0	0
OTU_189	25	Root	Bacteria	Proteobacteria	.	Gammaproteobacteria	.	Enterobacteriales	.	Enterobacteriaceae	.	Yersinia	.	0.67	Rahnella_victoriana_strain_FRB_225_(NR_146847.1)	100	15	0	0	0	0	0	0	0	0	0	0	0	0	0	0	0	0	0	0	0	0	0	0	7	0	0	0	12	6	0	0	0	0
OTU_218	25	Root	Bacteria	Firmicutes	.	Clostridia	.	Clostridiales	.	Ruminococcaceae	.	Faecalibacterium	.	0.72	Faecalibacterium_prausnitzii_(T)_ATCC_27768_(AJ413954)	94.5	1	7	5	0	0	9	4	0	0	0	0	0	0	0	0	0	0	0	0	0	0	0	0	0	0	0	0	0	0	0	0	0	0
OTU_172	25	Root	Bacteria	Firmicutes	.	Clostridia	.	Clostridiales	.	Ruminococcaceae	.	Oscillibacter	.	0.96	Oscillibacter_valericigenes_(T)_Sjm18-20_(=_NBRC_101213)_(AB238598)	93.7	1	0	0	0	0	0	0	0	0	5	0	13	7	0	0	0	0	0	0	0	0	0	0	0	0	0	0	0	0	0	0	0	0
OTU_190	24	Root	Bacteria	Firmicutes	.	Clostridia	.	Clostridiales	.	Lachnospiraceae	.	Anaerosporobacter	.	0.7	Cuneatibacter_caecimuris_strain_BARN-424-CC-10_(NR_144608.1)	95.7	1	0	0	1	2	0	0	0	0	0	0	18	0	0	0	0	0	0	0	0	0	0	0	0	0	0	0	0	0	0	0	0	0
OTU_176	24	Root	Bacteria	Firmicutes	.	Clostridia	.	Clostridiales	.	Clostridiales_Incertae Sedis XIII	.	Mogibacterium	.	0.52	Ihubacter_massiliensis_strain_Marseille-P2843_(NR_144749.1)	94	2	0	0	0	0	0	0	0	0	0	0	0	0	0	0	0	0	0	0	0	0	0	0	0	11	0	0	0	0	7	6	0	0
OTU_175	24	Root	Bacteria	Firmicutes	.	Clostridia	.	Clostridiales	.	Ruminococcaceae	.	Ruminococcus	.	0.99	Ruminococcus_callidus_(T)_ATCC_27760_(L76596)	96	1	0	0	0	0	0	0	0	0	0	0	0	0	0	3	0	0	5	5	7	4	0	0	0	0	0	0	0	0	0	0	0	0
OTU_183	22	Root	Bacteria	Firmicutes	.	Erysipelotrichia	.	Erysipelotrichales	.	Erysipelotrichaceae	.	Clostridium XVIII	.	1	Clostridium_ramosum_(T)_DSM_1402_(X73440)	100	1	0	0	0	0	0	0	0	0	0	0	0	0	0	0	0	0	0	0	0	0	0	0	0	0	0	0	8	8	0	0	0	0
OTU_178	22	Root	Bacteria	Firmicutes	.	Clostridia	.	Clostridiales	.	Clostridiales_Incertae Sedis XIII	.	Mogibacterium	.	1	Mogibacterium_neglectum_(T)_ATCC_700924_(=P9a-h)_(AB037875)	100	2	0	0	0	0	0	0	0	0	0	0	0	0	0	0	0	0	0	0	0	0	0	0	0	0	0	0	10	12	0	0	0	0
OTU_180	21	Root	Bacteria	Firmicutes	.	.	.	.	.	.	.	.	.	0.5	*	0	1	0	0	0	0	0	0	0	0	0	0	0	0	0	0	0	0	0	0	0	0	0	0	15	6	0	0	0	0	0	0	0	0
OTU_205	21	Root	Bacteria	Firmicutes	.	Clostridia	.	Clostridiales	.	Ruminococcaceae	.	Oscillibacter	.	0.98	Oscillibacter_sp._GH1_(JF750939)	97.6	1	0	0	0	0	5	2	0	0	0	0	0	3	0	0	0	0	0	0	0	0	0	0	1	0	0	0	0	0	0	0	8	2
OTU_182	21	Root	Bacteria	Proteobacteria	.	Alphaproteobacteria	.	Rhodospirillales	.	Rhodospirillaceae	.	Aestuariispira	.	0.6	*	0	1	0	4	8	9	0	0	0	0	0	0	0	0	0	0	0	0	0	0	0	0	0	0	0	0	0	0	0	0	0	0	0	0
OTU_231	20	Root	Bacteria	Proteobacteria	.	Betaproteobacteria	.	Burkholderiales	.	Sutterellaceae	.	Sutterella	.	0.52	Sutterella_wadsworthensis_(T)_WAL_9799_(GU585669)	94.1	1	0	0	0	0	0	0	0	0	0	0	0	0	0	0	0	0	0	0	0	0	0	0	0	0	0	0	0	0	0	0	0	0
OTU_199	19	Root	Bacteria	Bacteroidetes	.	Bacteroidia	.	Bacteroidales	.	Rikenellaceae	.	Rikenella	.	1	Rikenella_microfusus_(T)_(L16498)	100	1	0	0	0	0	0	0	0	0	0	0	0	0	0	0	0	0	0	0	0	0	0	0	4	0	0	0	0	0	2	13	0	0
OTU_186	18	Root	Bacteria	Coriobacteriia	.	Actinobacteria	Coriobacteridae	Coriobacteriales	Coriobacterineae	Coriobacteriaceae	.	Collinsella	.	1	Collinsella_intestinalis_strain_JCM_10643_(NR_113165.1)	100	1	0	0	0	0	0	0	9	9	0	0	0	0	0	0	0	0	0	0	0	0	0	0	0	0	0	0	0	0	0	0	0	0
OTU_251	18	Root	Bacteria	Firmicutes	.	Clostridia	.	Clostridiales	.	Lachnospiraceae	.	Roseburia	.	0.5	Roseburia_hominis_(T)_type_strain:_A2-183_(AJ270482)	96.8	4	0	1	1	11	0	0	0	0	0	0	0	0	0	0	0	0	0	2	3	0	0	0	0	0	0	0	0	0	0	0	0	0
OTU_192	16	Root	Bacteria	Firmicutes	.	Clostridia	.	Clostridiales	.	.	.	.	.	0.82	Acetivibrio_ethanolgignens_type_strain:_DSM_3005_(FR749897)	87	2	0	0	0	0	0	0	0	0	0	0	0	0	0	0	0	0	0	0	0	0	0	0	8	4	0	0	0	0	0	4	0	0
OTU_203	15	Root	Bacteria	Firmicutes	.	Clostridia	.	Clostridiales	.	Ruminococcaceae	.	Intestinimonas	.	0.98	Intestinimonas_butyriciproducens_SRB-521-5-I_(KC311367)	98	1	0	0	0	0	0	0	0	0	0	0	0	0	0	3	0	0	0	0	0	0	0	0	0	1	0	0	0	0	0	0	0	11
OTU_198	15	Root	Bacteria	Firmicutes	.	Clostridia	.	Clostridiales	.	Ruminococcaceae	.	Flavonifractor	.	0.78	Pseudoflavonifractor_capillosus_(T)_ATCC_29799_(AY136666)	93.3	2	0	0	0	0	0	0	0	0	0	0	0	0	0	0	0	0	0	0	0	0	0	0	11	4	0	0	0	0	0	0	0	0
OTU_197	14	Root	Bacteria	Firmicutes	.	Clostridia	.	Clostridiales	.	Lachnospiraceae	.	.	.	0.96	Mordavella_massiliensis_strain_Marseille-P3246_(NR_147406.1)	97.2	1	0	0	0	0	0	0	0	0	0	0	0	0	0	0	0	0	0	0	0	0	0	0	13	1	0	0	0	0	0	0	0	0
OTU_208	14	Root	Bacteria	Firmicutes	.	Clostridia	.	Clostridiales	.	Ruminococcaceae	.	Oscillibacter	.	1	Oscillibacter_sp._GH1_(JF750939)	94.1	1	0	0	0	0	0	0	0	0	0	0	4	5	0	5	0	0	0	0	0	0	0	0	0	0	0	0	0	0	0	0	0	0
OTU_219	14	Root	Bacteria	Firmicutes	.	Clostridia	.	Clostridiales	.	.	.	.	.	0.86	Clostridium_symbiosum_strain_ATCC_14940_(M59112)	88.1	1	0	0	0	0	0	0	0	0	0	0	0	0	14	0	0	0	0	0	0	0	0	0	0	0	0	0	0	0	0	0	0	0
OTU_201	13	Root	Bacteria	Firmicutes	.	Clostridia	.	Clostridiales	.	Ruminococcaceae	.	.	.	0.95	Colidextribacter_massiliensis_strain_Marseille-P3083_(NR_147375.1)	92.1	1	0	0	0	0	0	0	0	0	0	0	0	0	0	0	0	0	0	0	0	0	0	0	10	0	0	0	0	0	3	0	0	0
OTU_196	13	Root	Bacteria	Firmicutes	.	Clostridia	.	Clostridiales	.	Ruminococcaceae	.	Faecalibacterium	.	0.75	Faecalibacterium_prausnitzii_(T)_ATCC_27768_(AJ413954)	93.7	1	0	0	0	0	0	0	0	0	0	0	0	0	0	0	0	0	0	0	0	0	0	0	0	0	0	0	0	13	0	0	0	0
OTU_214	13	Root	Bacteria	Firmicutes	.	Clostridia	.	Clostridiales	.	Lachnospiraceae	.	Clostridium XlVb	.	0.8	Clostridium_colinum_(T)_type_strain:_DSM_6011_(X76748)	94.1	1	0	0	0	0	0	0	0	0	5	3	0	3	0	0	0	0	0	0	0	0	0	0	0	0	0	0	0	0	0	0	0	0
OTU_210	13	Root	Bacteria	Firmicutes	.	Clostridia	.	Clostridiales	.	Ruminococcaceae	.	Faecalibacterium	.	0.74	Caproiciproducens_galactitolivorans_strain_BS-1_(NR_145929.1)	92.5	1	0	0	0	0	0	0	6	1	0	0	0	0	0	0	0	0	0	0	0	0	0	0	0	0	0	0	0	0	0	0	0	0
OTU_207	12	Root	Bacteria	Firmicutes	.	Clostridia	.	Clostridiales	.	.	.	.	.	0.89	Vallitalea_guaymasensis_type_strain:_Ra1766G1_(HE805640)	90.1	1	0	0	0	0	0	0	0	0	0	0	0	0	0	0	0	0	0	0	0	0	0	0	6	6	0	0	0	0	0	0	0	0
OTU_234	12	Root	Bacteria	Bacteroidetes	.	Bacteroidia	.	Bacteroidales	.	Bacteroidaceae	.	Bacteroides	.	1	Bacteroides_clarus_(T)_YIT_12056_(AB490801)	100	1	0	3	4	2	0	0	0	0	1	0	0	2	0	0	0	0	0	0	0	0	0	0	0	0	0	0	0	0	0	0	0	0
OTU_211	12	Root	Bacteria	Firmicutes	.	Erysipelotrichia	.	Erysipelotrichales	.	Erysipelotrichaceae	.	.	.	0.98	[Clostridium]_innocuum_strain_B-3_(NR_029164.1)	96.4	1	0	0	0	0	0	0	0	0	0	0	0	0	0	0	0	0	0	0	0	0	0	0	0	0	0	0	4	8	0	0	0	0
OTU_215	11	Root	Bacteria	.	.	.	.	.	.	.	.	.	.	0.98	*	0	1	0	0	0	0	0	0	0	0	0	0	0	0	0	0	0	0	0	0	0	0	0	0	0	3	0	0	0	0	5	3	0	0
OTU_200	11	Root	Bacteria	.	.	.	.	.	.	.	.	.	.	0.98	*	0	1	0	0	0	0	0	0	0	0	0	0	0	0	6	5	0	0	0	0	0	0	0	0	0	0	0	0	0	0	0	0	0	0
OTU_213	11	Root	Bacteria	Firmicutes	.	.	.	.	.	.	.	.	.	0.87	Geosporobacter_subterraneus_(T)_VNs68_(DQ643978)	87.8	2	0	0	0	0	0	0	0	0	0	0	0	0	0	0	0	0	0	0	0	0	0	0	5	6	0	0	0	0	0	0	0	0
OTU_223	11	Root	Bacteria	Firmicutes	.	Clostridia	.	Clostridiales	.	Lachnospiraceae	.	Anaerostipes	.	0.73	Anaerostipes_sp._5_1_63FAA_(JF412658)	95.3	3	0	0	0	0	0	0	0	0	0	0	0	0	0	0	0	0	0	0	0	0	0	0	5	6	0	0	0	0	0	0	0	0
OTU_242	11	Root	Bacteria	Firmicutes	.	Clostridia	.	Clostridiales	.	.	.	.	.	0.98	Emergencia_timonensis_strain_SN18_(NR_144737.1)	92.5	2	0	0	0	0	0	0	0	0	0	0	0	0	0	0	0	0	0	0	0	0	0	0	0	0	0	0	0	0	0	0	5	6
OTU_227	11	Root	Bacteria	Firmicutes	.	Clostridia	.	Clostridiales	.	Ruminococcaceae	.	Oscillibacter	.	0.96	Oscillibacter_sp._GH1_(JF750939)	95.3	1	0	0	0	0	0	0	0	0	0	0	0	0	0	0	0	0	0	0	0	0	0	0	3	8	0	0	0	0	0	0	0	0
OTU_206	10	Root	Bacteria	Firmicutes	.	.	.	.	.	.	.	.	.	0.51	Acholeplasma_vituli_(T)_FC-097_(AF031479)	86.9	1	0	0	0	0	0	0	0	0	0	0	0	0	0	0	0	0	0	0	0	0	0	0	10	0	0	0	0	0	0	0	0	0
OTU_204	10	Root	Bacteria	Coriobacteriia	.	Actinobacteria	Coriobacteridae	Coriobacteriales	Coriobacterineae	Coriobacteriaceae	.	.	.	0.77	Raoultibacter_massiliensis_strain_Marseille-P2849_(NR_144751.1)	88.5	1	0	0	0	0	0	0	0	0	0	0	5	5	0	0	0	0	0	0	0	0	0	0	0	0	0	0	0	0	0	0	0	0
OTU_220	10	Root	Bacteria	Firmicutes	.	Clostridia	.	Clostridiales	.	Ruminococcaceae	.	Clostridium IV	.	0.64	Clostridium_methylpentosum_(T)_DSM_5476_(Y18181)	97.2	1	0	0	0	0	0	0	0	0	0	0	0	0	0	0	0	0	0	0	0	0	0	0	0	0	0	0	6	4	0	0	0	0
OTU_209	9	Root	Bacteria	Firmicutes	.	Erysipelotrichia	.	Erysipelotrichales	.	Erysipelotrichaceae	.	Faecalicoccus	.	0.98	Faecalicoccus_acidiformans_37-2a_(HQ452864)	96	1	0	0	0	0	0	0	0	0	0	0	0	0	0	0	0	0	0	0	0	0	0	0	0	0	0	0	4	5	0	0	0	0
OTU_244	9	Root	Bacteria	Bacteroidetes	.	Bacteroidia	.	Bacteroidales	.	Rikenellaceae	.	Alistipes	.	1	Alistipes_indistinctus_(T)_YIT_12060_(AB490804)	98.8	1	0	0	0	0	0	0	0	0	0	0	0	0	0	0	0	0	0	0	9	0	0	0	0	0	0	0	0	0	0	0	0	0
OTU_229	9	Root	Bacteria	Firmicutes	.	Clostridia	.	Clostridiales	.	Ruminococcaceae	.	.	.	0.74	Clostridium_termitidis_(T)_type_strain:_DSM5398_(FR733680)	90.9	2	0	0	0	0	0	0	0	0	0	0	0	0	0	0	0	0	8	0	1	0	0	0	0	0	0	0	0	0	0	0	0	0
OTU_216	8	Root	Bacteria	Coriobacteriia	.	Actinobacteria	Coriobacteridae	Coriobacteriales	Coriobacterineae	Coriobacteriaceae	.	Slackia	.	1	Slackia_isoflavoniconvertens_(T)_HE8_(EU826403)	100	1	0	0	0	0	0	0	0	0	0	0	0	0	0	0	0	0	0	0	0	0	0	0	0	0	0	0	0	0	0	0	0	7
OTU_257	8	Root	Bacteria	Firmicutes	.	Clostridia	.	Clostridiales	.	.	.	.	.	0.95	Blautia_stercoris_GAM6-1_(HM626177)	87.7	2	0	0	0	0	0	0	0	0	0	0	0	0	0	0	0	0	0	0	0	0	0	0	8	0	0	0	0	0	0	0	0	0
OTU_212	8	Root	Bacteria	Bacteroidetes	.	Bacteroidia	.	Bacteroidales	.	.	.	.	.	0.71	Alistipes_inops_strain_627_(NR_145882.1)	100	2	0	0	0	0	0	0	0	0	0	0	0	0	0	0	0	0	0	0	0	0	0	0	0	4	0	0	0	0	4	0	0	0
OTU_232	7	Root	Bacteria	Firmicutes	.	Clostridia	.	Clostridiales	.	Ruminococcaceae	.	Sporobacter	.	0.79	Sporobacter_termitidis_(T)_SYR_(Z49863)	94.1	1	0	0	0	0	0	0	0	0	0	0	0	0	1	0	0	0	0	0	0	0	0	0	0	0	0	0	0	0	0	0	0	0
OTU_262	7	Root	Bacteria	Firmicutes	.	Clostridia	.	Clostridiales	.	Clostridiales_Incertae Sedis XIII	.	.	.	0.65	Ihubacter_massiliensis_strain_Marseille-P2843_(NR_144749.1)	93.3	1	0	0	0	0	0	0	0	0	0	0	0	0	0	0	0	0	2	0	0	0	0	0	2	0	0	0	0	0	0	0	3	0
OTU_217	7	Root	Bacteria	Firmicutes	.	Clostridia	.	Clostridiales	.	.	.	.	.	0.75	Clostridium_alkalicellulosi_(T)_Z-7026_(AY959944)	88.9	3	0	0	0	0	0	0	0	0	0	0	0	0	0	0	0	0	0	0	0	7	0	0	0	0	0	0	0	0	0	0	0	0
OTU_226	6	Root	Bacteria	Firmicutes	.	Clostridia	.	Clostridiales	.	Lachnospiraceae	.	.	.	0.99	Lachnobacterium_bovis_(T)_LRC_5382;_ATCC_BAA-151_(AF298663)	95.7	1	0	0	0	0	0	0	0	0	0	0	6	0	0	0	0	0	0	0	0	0	0	0	0	0	0	0	0	0	0	0	0	0
OTU_224	6	Root	Bacteria	Firmicutes	.	Erysipelotrichia	.	Erysipelotrichales	.	Erysipelotrichaceae	.	.	.	0.87	Dielma_fastidiosa_strain_JC13_(NR_125593.1)	92.1	1	0	0	0	0	0	0	0	0	0	0	0	0	0	0	0	0	0	0	0	0	0	0	6	0	0	0	0	0	0	0	0	0
OTU_225	6	Root	Bacteria	Firmicutes	.	Clostridia	.	Clostridiales	.	Ruminococcaceae	.	Acetanaerobacterium	.	0.68	Negativibacillus_massiliensis_strain_Marseille-P3213_(NR_147378.1)	94	1	0	0	0	0	0	0	0	0	0	0	0	0	0	0	0	0	0	0	0	0	0	0	0	0	0	0	0	0	6	0	0	0
OTU_253	6	Root	Bacteria	Firmicutes	.	Clostridia	.	Clostridiales	.	Ruminococcaceae	.	Pseudoflavonifractor	.	0.86	Pseudoflavonifractor_capillosus_(T)_ATCC_29799_(AY136666)	98	1	0	0	0	0	0	0	0	3	0	0	0	0	0	0	0	0	0	0	0	0	0	0	0	0	0	0	0	0	0	0	0	3
OTU_221	6	Root	Bacteria	Firmicutes	.	Clostridia	.	Clostridiales	.	.	.	.	.	0.63	*	0	1	0	0	6	0	0	0	0	0	0	0	0	0	0	0	0	0	0	0	0	0	0	0	0	0	0	0	0	0	0	0	0	0
OTU_230	6	Root	Bacteria	Coriobacteriia	.	Actinobacteria	Coriobacteridae	Coriobacteriales	Coriobacterineae	Coriobacteriaceae	.	Eggerthella	.	1	Eggerthella_lenta_strain_JCM_9979_(NR_112038.1)	100	2	0	0	0	0	0	0	0	0	0	0	0	0	0	0	0	0	0	0	0	0	0	0	0	0	0	0	6	0	0	0	0	0
OTU_228	6	Root	Bacteria	Bacteroidetes	.	Bacteroidia	.	Bacteroidales	.	Rikenellaceae	.	Alistipes	.	0.96	Alistipes_indistinctus_(T)_YIT_12060_(AB490804)	92.1	1	0	0	0	0	0	0	0	0	0	0	0	0	2	4	0	0	0	0	0	0	0	0	0	0	0	0	0	0	0	0	0	0
OTU_235	5	Root	Bacteria	Firmicutes	.	Erysipelotrichia	.	Erysipelotrichales	.	Erysipelotrichaceae	.	Clostridium XVIII	.	0.98	Clostridium_spiroforme_(T)_ATCC_29900_(X75908)	98.4	1	0	0	0	0	0	0	5	0	0	0	0	0	0	0	0	0	0	0	0	0	0	0	0	0	0	0	0	0	0	0	0	0
OTU_233	5	Root	Bacteria	Firmicutes	.	Clostridia	.	Clostridiales	.	Ruminococcaceae	.	Sporobacter	.	0.51	Sporobacter_termitidis_(T)_SYR_(Z49863)	93.3	1	0	0	0	0	0	0	0	0	0	0	0	0	0	0	0	5	0	0	0	0	0	0	0	0	0	0	0	0	0	0	0	0
OTU_241	5	Root	Bacteria	Proteobacteria	.	Alphaproteobacteria	.	Rhodospirillales	.	Rhodospirillaceae	.	Aestuariispira	.	0.54	*	0	1	0	5	0	0	0	0	0	0	0	0	0	0	0	0	0	0	0	0	0	0	0	0	0	0	0	0	0	0	0	0	0	0
OTU_246	5	Root	Bacteria	Firmicutes	.	Clostridia	.	Clostridiales	.	Ruminococcaceae	.	.	.	1	Negativibacillus_massiliensis_strain_Marseille-P3213_(NR_147378.1)	96.8	1	0	0	0	0	0	0	0	5	0	0	0	0	0	0	0	0	0	0	0	0	0	0	0	0	0	0	0	0	0	0	0	0
OTU_236	5	Root	Bacteria	Firmicutes	.	Clostridia	.	Clostridiales	.	Lachnospiraceae	.	.	.	0.97	Clostridium_hathewayi_(T)_type_strain:_DSM_13479_=_CCUG_43506_(AJ311620)	95.3	1	0	0	0	0	0	0	0	0	0	0	0	0	0	0	0	0	0	0	0	0	0	0	0	0	0	0	0	0	5	0	0	0
OTU_255	5	Root	Bacteria	Firmicutes	.	Clostridia	.	Clostridiales	.	.	.	.	.	0.89	Clostridium_symbiosum_strain_ATCC_14940_(M59112)	88.5	1	0	0	0	0	0	0	0	0	0	0	0	0	0	0	0	0	0	0	5	0	0	0	0	0	0	0	0	0	0	0	0	0
OTU_239	5	Root	Bacteria	Firmicutes	.	Erysipelotrichia	.	Erysipelotrichales	.	Erysipelotrichaceae	.	.	.	1	Massiliomicrobiota_timonensis_strain_SN16_(NR_144738.1)	100	1	0	0	0	0	0	0	0	5	0	0	0	0	0	0	0	0	0	0	0	0	0	0	0	0	0	0	0	0	0	0	0	0
OTU_238	5	Root	Bacteria	Firmicutes	.	Clostridia	.	Clostridiales	.	.	.	.	.	0.56	Clostridium_hathewayi_(T)_type_strain:_DSM_13479_=_CCUG_43506_(AJ311620)	86.6	1	0	0	0	0	0	0	0	0	0	0	0	0	0	0	0	0	0	0	0	0	0	0	0	3	0	0	0	0	0	2	0	0
OTU_248	4	Root	Bacteria	.	.	.	.	.	.	.	.	.	.	1	Spiroplasma_velocicrescens_(T)_ATCC_35262;_MQ-4_(AY189311)	86.1	2	0	0	0	0	0	0	0	0	0	0	0	0	4	0	0	0	0	0	0	0	0	0	0	0	0	0	0	0	0	0	0	0
OTU_245	4	Root	Bacteria	Firmicutes	.	Clostridia	.	Clostridiales	.	Lachnospiraceae	.	.	.	0.99	Eubacterium_ramulus_ATCC_29099_(L34623)	96.4	1	0	0	0	0	0	0	0	0	0	0	0	0	0	0	0	0	0	0	0	0	0	0	0	0	0	0	0	0	0	0	0	4
OTU_240	4	Root	Bacteria	Firmicutes	.	.	.	.	.	.	.	.	.	0.67	Moorella_humiferrea_(T)_64_FGQ_(GQ872425)	86.6	1	0	0	0	0	0	0	0	0	0	0	0	0	0	0	0	0	0	0	0	0	0	0	4	0	0	0	0	0	0	0	0	0
OTU_247	4	Root	Bacteria	Coriobacteriia	.	Actinobacteria	Coriobacteridae	Coriobacteriales	Coriobacterineae	Coriobacteriaceae	.	Olsenella	.	0.67	Collinsella_bouchesdurhonensis_strain_Marseille-P3296_(NR_147379.1)	94	1	0	0	0	0	0	0	0	0	0	0	0	0	0	0	0	0	0	0	0	0	0	0	0	0	0	0	0	0	0	0	0	4
OTU_254	3	Root	Bacteria	Firmicutes	.	Clostridia	.	Clostridiales	.	Lachnospiraceae	.	.	.	0.99	Clostridium_polysaccharolyticum_(T)_DSM_1801_(X77839)	91.7	1	0	0	0	0	0	0	0	0	0	0	0	0	0	0	0	0	0	0	0	0	0	0	0	0	0	0	0	0	0	0	0	3
OTU_272	3	Root	Bacteria	Actinobacteria	.	Actinobacteria	Actinobacteridae	Actinomycetales	Actinomycineae	Actinomycetaceae	.	Actinomyces	.	1	Actinomyces_oris_JCM_16131_(AB545935)	100	3	0	0	0	0	0	0	0	0	0	0	0	0	0	0	0	0	0	0	0	0	0	0	0	0	0	0	0	3	0	0	0	0
OTU_252	3	Root	Bacteria	Firmicutes	.	Clostridia	.	Clostridiales	.	.	.	.	.	0.98	Anaerovorax_odorimutans_(T)_NorPut_(AJ251215)	92.5	1	0	0	0	0	0	0	0	0	0	0	0	0	0	0	0	0	0	0	0	0	0	0	0	0	0	0	0	0	0	0	3	0
OTU_249	3	Root	Bacteria	Firmicutes	.	Clostridia	.	Clostridiales	.	.	.	.	.	0.74	Christensenella_massiliensis_strain_Marseille-P2438_(NR_144742.1)	90.6	1	0	0	0	0	0	0	0	0	0	0	0	0	0	0	0	0	0	0	0	0	0	0	0	3	0	0	0	0	0	0	0	0
OTU_250	3	Root	Bacteria	Firmicutes	.	Erysipelotrichia	.	Erysipelotrichales	.	Erysipelotrichaceae	.	Faecalicoccus	.	0.84	Faecalicoccus_acidiformans_37-2a_(HQ452864)	96.4	1	0	0	0	0	0	0	0	0	0	0	0	0	0	0	0	0	0	0	0	0	0	0	3	0	0	0	0	0	0	0	0	0
OTU_256	3	Root	Bacteria	Firmicutes	.	Clostridia	.	Clostridiales	.	.	.	.	.	0.75	Lutispora_thermophila_(T)_EBR46_(AB186360)	92.9	1	0	0	0	3	0	0	0	0	0	0	0	0	0	0	0	0	0	0	0	0	0	0	0	0	0	0	0	0	0	0	0	0
OTU_258	2	Root	Bacteria	Proteobacteria	.	Gammaproteobacteria	.	Gammaproteobacteria_incertae_sedis	.	.	.	Candidatus Carsonella	.	0.55	*	0	1	0	0	0	2	0	0	0	0	0	0	0	0	0	0	0	0	0	0	0	0	0	0	0	0	0	0	0	0	0	0	0	0
OTU_261	2	Root	Bacteria	Firmicutes	.	Clostridia	.	Clostridiales	.	Ruminococcaceae	.	.	.	0.95	Anaerotruncus_rubiinfantis_strain_MT15_(NR_147398.1)	93.3	1	0	0	0	0	0	0	0	0	0	0	0	0	0	0	0	0	0	0	0	0	0	0	2	0	0	0	0	0	0	0	0	0
OTU_270	2	Root	Bacteria	Firmicutes	.	Bacilli	.	Lactobacillales	.	Carnobacteriaceae	.	.	.	0.59	Granulicatella_adiacens_(T)_GIFU12706_(D50540)	95.7	2	0	0	0	0	0	0	0	0	0	0	0	0	0	0	0	0	0	0	0	0	0	0	0	0	0	0	0	0	0	0	0	0
OTU_264	2	Root	Bacteria	Firmicutes	.	Clostridia	.	Clostridiales	.	Ruminococcaceae	.	Sporobacter	.	0.51	Sporobacter_termitidis_(T)_SYR_(Z49863)	94.1	1	0	0	0	0	0	0	0	0	0	0	0	0	0	0	0	0	0	0	0	0	0	0	0	2	0	0	0	0	0	0	0	0
OTU_260	2	Root	Bacteria	Firmicutes	.	Clostridia	.	Clostridiales	.	Lachnospiraceae	.	Blautia	.	0.6	Blautia_faecis_(T)_M25_(HM626178)	96.4	2	0	0	0	0	0	0	0	0	0	0	0	0	0	0	0	0	0	0	0	0	0	0	0	0	0	0	0	0	0	0	0	0
OTU_267	2	Root	Bacteria	Firmicutes	.	Clostridia	.	Clostridiales	.	Clostridiales_Incertae Sedis XIII	.	Anaerovorax	.	0.51	Anaerovorax_odorimutans_(T)_NorPut_(AJ251215)	93.3	1	0	0	0	0	0	0	0	0	0	0	0	0	0	0	0	0	0	0	0	0	0	0	0	0	0	0	0	0	0	0	0	0
OTU_271	2	Root	Bacteria	Proteobacteria	.	Deltaproteobacteria	.	Desulfovibrionales	.	Desulfovibrionaceae	.	Desulfovibrio	.	0.99	Desulfovibrio_piger_(T)_ATCC29098_(AF192152)	95.7	1	0	0	0	0	0	0	0	0	0	0	0	0	0	0	0	0	0	0	0	0	0	0	0	0	0	0	0	0	0	2	0	0
OTU_273	2	Root	Bacteria	Proteobacteria	.	Gammaproteobacteria	.	Enterobacteriales	.	Enterobacteriaceae	.	Escherichia/Shigella	.	0.76	Shigella_sonnei_type_strain:_CECT_4887_(FR870445)	96.4	5	0	0	0	0	0	0	0	0	0	0	0	0	0	0	0	0	0	0	0	0	0	0	0	2	0	0	0	0	0	0	0	0
OTU_268	2	Root	Bacteria	Firmicutes	.	Clostridia	.	Clostridiales	.	Ruminococcaceae	.	.	.	0.99	Ruminococcus_champanellensis_18P13_type_strain:_18P13_(AJ515913)	93.7	1	0	0	0	0	0	0	0	0	0	0	0	0	2	0	0	0	0	0	0	0	0	0	0	0	0	0	0	0	0	0	0	0
OTU_269	2	Root	Bacteria	Firmicutes	.	Clostridia	.	Clostridiales	.	Lachnospiraceae	.	.	.	0.99	Frisingicoccus_caecimuris_strain_PG-426-CC-1_(NR_144612.1)	98	1	0	0	0	0	0	0	0	0	0	0	0	0	0	0	0	0	0	0	0	0	0	0	2	0	0	0	0	0	0	0	0	0
OTU_263	2	Root	Bacteria	Firmicutes	.	Clostridia	.	Clostridiales	.	Lachnospiraceae	.	.	.	0.85	Extibacter_muris_strain_40cc-B-5824-ARE_(NR_144610.1)	92.9	1	0	0	0	0	0	0	0	0	0	0	0	0	0	0	0	0	0	0	0	0	0	0	2	0	0	0	0	0	0	0	0	0
[truncated: 8 more columns]

## Sheet: Kelpie OTU pct
																		2052	2344	2607	3005	2592	2413	4203	3853	2052	1750	4482	4155	2727	2533	785	674	2041	1681	2638	2352	2806	2576	2503	2292	3100	2813	6976	6255	1185	1135	1924	2030
OTU	Size	RDP classification												Confidence	#REF!	Match%	Match#	ERR695598	ERR695599	ERR695600	ERR695601	ERR695602	ERR695603	ERR695604	ERR695605	ERR695606	ERR695607	ERR695608	ERR695609	ERR695610	ERR695611	ERR695612	ERR695613	ERR695614	ERR695615	ERR695616	ERR695617	ERR695618	ERR695619	ERR695620	ERR695621	ERR695622	ERR695623	ERR695624	ERR695625	ERR695626	ERR695627	ERR695628	ERR695629
OTU_1	19769	Root	Bacteria	Bacteroidetes	.	Bacteroidia	.	Bacteroidales	.	Bacteroidaceae	.	Bacteroides	.	1	Bacteroides_dorei_(T)_JCM_13471;_175_(AB242142)	99.6	2	0.125731	0.131399	0.0778673	0.0921797	0.13966	0.123083	0.095408	0.119647	0.177388	0.141143	0.295627	0.237064	0.080308	0.0698776	0.0127389	0.0267062	0.0828025	0.0279595	0.0943897	0.110119	0.674626	0.704581	0.0731123	0.0641361	0.700968	0.702097	0.180763	0.195364	0.0472574	0.0140969	0.126299	0.137438
OTU_4	7177	Root	Bacteria	Firmicutes	.	Clostridia	.	Clostridiales	.	Ruminococcaceae	.	Faecalibacterium	.	1	Faecalibacterium_prausnitzii_(T)_ATCC_27768_(AJ413954)	98.8	1	0.0852827	0.0857509	0.0705792	0.0815308	0.114969	0.110236	0.109208	0.100701	0.0643275	0.0594286	0.0495315	0.0392298	0.0597726	0.0588235	0.0955414	0.0697329	0.11073	0.107079	0.114481	0.106718	0	0	0.00479425	0.0039267	0	0	0.101061	0.0965627	0.00421941	0.00528634	0.0930353	0.126108
OTU_2	6589	Root	Bacteria	Bacteroidetes	.	Bacteroidia	.	Bacteroidales	.	Prevotellaceae	.	Prevotella	.	1	Prevotella_copri_(T)_CB7_(AB064923)	100	1	0	0	0	0	0	0	0	0	0.0380117	0.0325714	0.00446229	0.00216606	0.133847	0.131859	0.101911	0.0994065	0.171975	0.193932	0.173237	0.203231	0	0	0	0	0	0	0	0	0.00506329	0.00352423	0	0
OTU_5	4891	Root	Bacteria	Firmicutes	.	Clostridia	.	Clostridiales	.	Lachnospiraceae	.	Roseburia	.	0.99	Eubacterium_rectale_(T)_(L34627)	100	1	0.0550682	0.0725256	0.164173	0.163394	0.0250772	0.0331538	0.0642398	0.0596937	0.0760234	0.0662857	0.0336903	0.0264741	0.0300697	0.0272404	0.0343949	0.0385757	0.0166585	0.0178465	0.0170584	0.0178571	0.00997862	0.00776398	0	0.0008726	0.00774194	0.00568788	0.0498853	0.054996	0	0	0.0997921	0.101478
OTU_3	4706	Root	Bacteria	Proteobacteria	.	Gammaproteobacteria	.	Enterobacteriales	.	Enterobacteriaceae	.	Enterobacter	.	0.51	Enterobacter_cancerogenus_(T)_LMG_2693_(Z96078)	100	33	0	0	0	0	0	0	0	0	0	0	0	0	0	0	0	0	0	0	0	0	0	0	0	0	0	0	0.356938	0.353957	0.00168776	0	0	0
OTU_9	3719	Root	Bacteria	Bacteroidetes	.	Bacteroidia	.	Bacteroidales	.	Bacteroidaceae	.	Bacteroides	.	1	Bacteroides_finegoldii_(T)_JCM_13345;_199T_(AB222699)	100	1	0.0882066	0.0763652	0.021097	0.0246256	0.105324	0.095317	0.038306	0.0181677	0.041423	0.0428571	0.0410531	0.0495788	0.0106344	0.0173707	0	0	0.0195982	0.0226056	0.0231236	0.0187075	0.0256593	0.0256211	0.00998801	0.0091623	0.0332258	0.0312833	0.0593463	0.0417266	0.00843882	0.00969163	0.0816008	0.0630542
OTU_12	2561	Root	Bacteria	Firmicutes	.	Clostridia	.	Clostridiales	.	Lachnospiraceae	.	Lachnospiracea_incertae_sedis	.	0.85	Eubacterium_eligens_(T)_(L34420)	99.6	1	0.0550682	0.0482082	0.0172612	0.0133111	0.0636574	0.0576046	0.0480609	0.0441215	0.0131579	0.0217143	0.0229808	0.0216606	0.0282362	0.0303987	0.0305732	0.0341246	0.011269	0.0196312	0.0216073	0.0178571	0	0	0	0	0	0	0.0202122	0.0143885	0.00253165	0	0	0
OTU_7	2480	Root	Bacteria	Bacteroidetes	.	Bacteroidia	.	Bacteroidales	.	Bacteroidaceae	.	Bacteroides	.	1	Bacteroides_coprocola_(T)_M16_(AB200224)	100	1	0.0165692	0.0196246	0.0571538	0.0402662	0.00694444	0.0161625	0.00309303	0	0.0774854	0.106857	0.102187	0.155235	0.00990099	0.00394789	0	0	0	0	0	0	0	0	0	0	0	0	0.0296732	0.0305356	0	0	0	0
OTU_8	2480	Root	Bacteria	Bacteroidetes	.	Bacteroidia	.	Bacteroidales	.	Bacteroidaceae	.	Bacteroides	.	1	Bacteroides_uniformis_(T)_JCM_5828T_(AB050110)	100	1	0.0565302	0.0383959	0.00958957	0.01198	0.0486111	0.0567758	0.0137997	0.0158318	0.0136452	0.00742857	0.00937082	0.0101083	0.00550055	0.0106593	0	0	0.0240078	0.0118977	0.0159212	0.0289116	0.0256593	0.0361025	0.0511386	0.0658813	0.0254839	0.0319943	0.0239392	0.0258993	0.0810127	0.0810573	0.018711	0.0167488
OTU_6	2286	Root	Bacteria	Firmicutes	.	Clostridia	.	Clostridiales	.	Lachnospiraceae	.	.	.	1	Lactobacillus_rogosae_strain_ATCC_27753_(NR_104836.1)	100	1	0.0155945	0.0217577	0.0023015	0.00266223	0.0327932	0.0385412	0.0480609	0.0467168	0.0287524	0.0365714	0.0406069	0.034657	0.0414375	0.0260561	0.033121	0.0430267	0.0264576	0.0249851	0.0223654	0.0259354	0.0135424	0.011646	0	0.0017452	0.0170968	0.0110203	0.000143349	0	0	0	0.00987526	0.00541872
OTU_13	1937	Root	Bacteria	Bacteroidetes	.	Bacteroidia	.	Bacteroidales	.	Porphyromonadaceae	.	Parabacteroides	.	1	Parabacteroides_distasonis_(T)_JCM_5825_(AB238922)	99.2	1	0	0.00255973	0.00767165	0.00565724	0	0	0.0242684	0.0238775	0.00633528	0.0131429	0.00959393	0.00986763	0	0	0	0	0.0132288	0.0118977	0.0197119	0.0119048	0.0841055	0.0718168	0.0379545	0.0200698	0.073871	0.0600782	0.0216456	0.0263789	0.0421941	0.0555066	0	0.0187192
OTU_10	1612	Root	Bacteria	Proteobacteria	.	Betaproteobacteria	.	Burkholderiales	.	Sutterellaceae	.	Sutterella	.	1	Sutterella_wadsworthensis_(T)_WAL_9799_(GU585669)	100	1	0.00877193	0.0119454	0	0	0.0142747	0.0165769	0.00118963	0.0020763	0.0243665	0.0245714	0.0189647	0.0199759	0.00403374	0.00592183	0	0	0.00832925	0.00475907	0.00720243	0.0042517	0.0694939	0.0694876	0.00599281	0.0047993	0.0687097	0.0657661	0.00745413	0.00799361	0	0	0.0155925	0.0162562
OTU_11	1386	Root	Bacteria	Bacteroidetes	.	Bacteroidia	.	Bacteroidales	.	Prevotellaceae	.	Prevotella	.	1	Prevotella_stercorea_(T)_CB35_(AB244774)	98.4	1	0	0	0	0	0	0	0	0	0	0	0	0	0	0	0	0	0	0	0	0	0	0	0	0	0	0	0	0	0	0	0	0
OTU_15	1336	Root	Bacteria	Firmicutes	.	Clostridia	.	Clostridiales	.	Lachnospiraceae	.	Anaerostipes	.	1	Anaerostipes_sp._5_1_63FAA_(JF412658)	100	3	0.00584795	0.00511945	0.00843882	0.0093178	0.0108025	0.0103605	0.0295027	0.034259	0.00877193	0.00457143	0.0171798	0.0168472	0.00403374	0.00157916	0.0191083	0.0237389	0.0191083	0.0303391	0.0242608	0.0297619	0.00712758	0.00582298	0	0	0.00612903	0.00533239	0	0	0	0	0	0.00147783
OTU_14	1233	Root	Bacteria	Firmicutes	.	Clostridia	.	Clostridiales	.	Lachnospiraceae	.	Blautia	.	1	Blautia_luti_strain_DSM_14534_(NR_114315.1)	100	2	0.00438596	0.00639932	0.0118911	0.0163062	0.00385802	0.00745959	0.0135617	0.01687	0.00389864	0.00742857	0.0189647	0.0190132	0.00440044	0.00473747	0.0509554	0.0519288	0.00783929	0.00713861	0.0075815	0.00977891	0.00213828	0.00388199	0.00239712	0.0021815	0.00354839	0.00177746	0.000143349	0	0	0	0.00831601	0.00689655
OTU_17	1174	Root	Bacteria	Firmicutes	.	Clostridia	.	Clostridiales	.	Lachnospiraceae	.	Fusicatenibacter	.	0.96	Fusicatenibacter_saccharivorans_HT03-11_(AB698910)	100	1	0.00633528	0.00853242	0.00690449	0.0113145	0.0115741	0.00828844	0.0140376	0.0290683	0.00389864	0.00228571	0.00647033	0.00505415	0.00110011	0.00236873	0.033121	0.0178042	0.0240078	0.0267698	0.0265353	0.0136054	0	0.00271739	0	0	0.00258065	0	0	0	0	0	0.014553	0.0147783
OTU_16	1163	Root	Bacteria	Firmicutes	.	Negativicutes	.	Selenomonadales	.	Veillonellaceae	.	Megamonas	.	0.93	Megamonas_funiformis_(T)_YIT_11815_(=_JCM_14723,_=_DSM_19343)_(AB300988)	100	1	0	0	0	0	0	0	0	0	0.0131579	0.0142857	0.021419	0.0223827	0	0	0.0420382	0.0430267	0.00146987	0	0	0	0	0	0	0	0	0	0	0	0	0	0	0
OTU_21	1135	Root	Bacteria	Bacteroidetes	.	Bacteroidia	.	Bacteroidales	.	Porphyromonadaceae	.	Parabacteroides	.	1	Parabacteroides_goldsteinii_(T)_WAL_12034_(AY974070)	100	1	0	0	0.00843882	0	0	0	0	0	0	0	0	0	0	0	0	0	0	0	0	0	0	0	0.0395525	0.0388307	0	0	0	0	0.0506329	0.0528634	0	0
OTU_20	1079	Root	Bacteria	Firmicutes	.	Clostridia	.	Clostridiales	.	Lachnospiraceae	.	Roseburia	.	1	Roseburia_inulinivorans_(T)_type_strain:_A2-194_(AJ270473)	100	1	0.00584795	0.00298635	0.000383583	0.00166389	0.00154321	0.000828844	0.0404473	0.0389307	0.0219298	0.0337143	0.011602	0.0178099	0	0.00592183	0.0280255	0.0252226	0.00930916	0.0249851	0.0159212	0.00935374	0	0	0	0	0.00129032	0.00319943	0.0055906	0.00863309	0	0	0	0.00147783
OTU_18	1063	Root	Bacteria	Bacteroidetes	.	Bacteroidia	.	Bacteroidales	.	Bacteroidaceae	.	Bacteroides	.	1	Bacteroides_massiliensis_(T)_B84634_(AY126616)	100	1	0.0545809	0.0511945	0	0	0.0775463	0.0899295	0	0	0.0107212	0.00742857	0.0149487	0.0202166	0.0172351	0.0197394	0	0	0.0137188	0.015467	0.0140258	0.0106293	0	0	0	0	0	0	0	0	0	0	0	0
OTU_25	930	Root	Bacteria	Firmicutes	.	Clostridia	.	Clostridiales	.	Lachnospiraceae	.	Clostridium XlVa	.	0.66	Clostridium_algidixylanolyticum_(T)_SPL73_(AF092549)	97.6	2	0.00389864	0.00255973	0.00383583	0.0063228	0	0	0.0137997	0.0150532	0.00877193	0.00971429	0.00513164	0.00914561	0.0128346	0.015002	0.0229299	0.00296736	0.00881921	0.00594884	0.00568613	0.00807823	0	0	0	0	0	0	0.0361239	0.030056	0	0	0	0
OTU_19	922	Root	Bacteria	Firmicutes	.	Clostridia	.	Clostridiales	.	Lachnospiraceae	.	Coprococcus	.	0.98	Coprococcus_comes_(T)_ATCC_27758_(EF031542)	100	1	0.00730994	0.0115188	0.0107403	0.00532446	0.00501543	0.00704517	0.0268856	0.0189463	0.0146199	0.0177143	0.011602	0.0101083	0.00806747	0.00829056	0.0229299	0	0.011269	0	0.0125095	0.00935374	0	0	0	0.0021815	0	0	0	0	0	0	0.0176715	0.0128079
OTU_27	845	Root	Bacteria	Firmicutes	.	Clostridia	.	Clostridiales	.	Ruminococcaceae	.	Gemmiger	.	0.81	Gemmiger_formicilis_(T)_ATCC_27749;_X2-56_(GU562446)	100	1	0.0180312	0.012372	0.0245493	0.0193012	0.00578704	0.00621633	0.00713776	0.00960291	0.0165692	0.0177143	0.0118251	0.012515	0.00330033	0.00473747	0.0433121	0.037092	0.00734934	0.0142772	0.00416983	0.00680272	0	0	0.0139832	0.0117801	0	0	0	0	0	0	0.0176715	0.0142857
OTU_46	816	Root	Bacteria	Actinobacteria	.	Actinobacteria	Actinobacteridae	Bifidobacteriales	.	Bifidobacteriaceae	.	Bifidobacterium	.	1	Bifidobacterium_stercoris_(T)_Eg1_(FJ611793)	100	6	0.00292398	0.00213311	0.00728807	0.0046589	0.00270062	0.0037298	0.00309303	0.00311446	0.0121832	0.00571429	0.00446229	0.00264741	0.00440044	0.00236873	0	0.00445104	0.00734934	0.0107079	0.00871873	0.0114796	0	0	0	0	0	0	0.00157683	0.00207834	0	0	0.0602911	0.0655172
OTU_24	808	Root	Bacteria	Firmicutes	.	Negativicutes	.	Selenomonadales	.	Acidaminococcaceae	.	Phascolarctobacterium	.	1	Phascolarctobacterium_faecium_(T)_(X72865)	100	1	0.00877193	0.0110922	0.000383583	0.00166389	0	0	0.0601951	0.0576174	0.00730994	0.00857143	0.00580098	0.00697954	0	0	0.00764331	0.0148368	0	0	0	0	0	0	0	0	0	0	0.00731078	0.0115108	0	0	0	0
OTU_23	806	Root	Bacteria	Bacteroidetes	.	Bacteroidia	.	Bacteroidales	.	Bacteroidaceae	.	Bacteroides	.	1	Bacteroides_stercoris_(T)_type_strain:_ATCC_43183_(X83953)	100	1	0	0	0	0	0	0	0.0306924	0.047755	0	0	0	0	0.0187019	0.0284248	0	0	0.044586	0.0220107	0.0235027	0.019983	0	0	0	0	0	0	0.00874427	0.00783373	0	0	0	0
OTU_22	784	Root	Bacteria	Bacteroidetes	.	Bacteroidia	.	Bacteroidales	.	Rikenellaceae	.	Alistipes	.	1	Alistipes_putredinis_(T)_(L16497)	99.2	1	0.0204678	0.012372	0.00920598	0.0133111	0.0219907	0.0128471	0.00237925	0.0020763	0.0224172	0.02	0.01361	0.0139591	0.00733407	0.00868535	0	0	0.00636943	0.0136823	0.00833965	0.00722789	0	0	0.0111866	0.0257417	0	0	0	0	0.0101266	0.00969163	0.0306653	0.0182266
OTU_38	702	Root	Bacteria	Bacteroidetes	.	Bacteroidia	.	Bacteroidales	.	Rikenellaceae	.	Alistipes	.	1	Alistipes_onderdonkii_(T)_WAL_8169_(AY974071)	100	1	0.00536062	0.00255973	0.0130418	0.00998336	0.00347222	0.00207211	0	0	0.00292398	0.004	0.00178492	0.00144404	0.00476714	0.00236873	0	0	0.00244978	0.010113	0.00833965	0.00680272	0	0	0.0451458	0.0510471	0	0	0.00229358	0.00143885	0.0691983	0.0748899	0.00519751	0.01133
OTU_76	680	Root	Bacteria	Bacteroidetes	.	Bacteroidia	.	Bacteroidales	.	Porphyromonadaceae	.	Parabacteroides	.	1	Parabacteroides_johnsonii_(T)_JCM_13406;_M-165_(AB261128)	100	1	0.0155945	0.0145051	0.00690449	0.0126456	0.0281636	0.0248653	0.00428266	0.00415261	0.0112086	0.00457143	0.0147256	0.0161252	0.00990099	0.00789578	0	0	0.00979912	0.0107079	0.00871873	0.0114796	0	0	0.00439473	0.0039267	0	0	0	0	0.00590717	0.00176211	0.0140333	0.0108374
OTU_31	661	Root	Bacteria	Bacteroidetes	.	Bacteroidia	.	Bacteroidales	.	Prevotellaceae	.	Alloprevotella	.	0.98	Prevotellamassilia_timonensis_strain_Marseille-P2831_(NR_144750.1)	98.4	1	0	0	0	0	0	0	0	0	0	0	0	0	0	0	0	0	0	0	0	0	0	0	0	0	0	0	0	0	0	0	0	0
OTU_28	660	Root	Bacteria	Firmicutes	.	Clostridia	.	Clostridiales	.	Lachnospiraceae	.	.	.	0.95	Clostridium_sphenoides_(T)_ATCC_19403_(AB075772)	95.7	4	0.00974659	0.00981229	0.0257	0.00665557	0.0266204	0.0198923	0.038068	0.0334804	0	0.00114286	0.0015618	0.00120337	0.00256692	0	0.0254777	0.0207715	0	0.00297442	0.00113723	0.00170068	0	0	0	0	0	0	0	0	0	0	0	0
OTU_26	659	Root	Bacteria	Firmicutes	.	Clostridia	.	Clostridiales	.	Ruminococcaceae	.	.	.	0.74	Clostridium_cellobioparum_(T)_DSM_1351_(X71856)	90.9	2	0.00389864	0.00938567	0.0130418	0.00898502	0	0.000828844	0	0	0.00925926	0.00914286	0.0174029	0.0146811	0.0267693	0.0276352	0.0140127	0.0192878	0.0127389	0.00832838	0.00720243	0.00467687	0	0	0	0	0	0	0	0	0	0	0.024948	0.0261084
OTU_29	623	Root	Bacteria	Bacteroidetes	.	Bacteroidia	.	Bacteroidales	.	Porphyromonadaceae	.	Odoribacter	.	1	Odoribacter_splanchnicus_strain_NCTC_10825_(L16496)	98.8	1	0.00341131	0.0132253	0.0023015	0.000998336	0.00462963	0.00331538	0	0	0.00341131	0.00971429	0.00446229	0.00505415	0.00183352	0	0	0	0	0	0	0	0	0	0.0431482	0.0497382	0	0	0.00616399	0.00495604	0.0413502	0.0537445	0.00727651	0.00738916
OTU_32	608	Root	Bacteria	Firmicutes	.	Negativicutes	.	Selenomonadales	.	Veillonellaceae	.	Dialister	.	1	Dialister_invisus_(T)_E7.25_(AY162469)	100	1	0.00536062	0.00213311	0	0	0.00810185	0.00787402	0	0	0.00146199	0	0	0	0.0385039	0.0367154	0	0	0.0215581	0.0273647	0.0322214	0.0306122	0	0	0.000799041	0	0	0	0	0	0	0	0.0192308	0.01133
OTU_30	583	Root	Bacteria	Bacteroidetes	.	Bacteroidia	.	Bacteroidales	.	Prevotellaceae	.	Paraprevotella	.	1	Paraprevotella_clara_(T)_YIT_11840_(=_JCM_14859,_=_DSM_19731)_(AB331896)	99.6	1	0	0	0	0	0	0	0	0	0	0	0	0	0.0799413	0.0829056	0	0	0.0181284	0.0214158	0.0144049	0.0187075	0	0	0	0	0	0	0	0	0	0	0	0
OTU_44	574	Root	Bacteria	Firmicutes	.	Clostridia	.	Clostridiales	.	Lachnospiraceae	.	Ruminococcus2	.	1	Ruminococcus_faecis_(T)_Eg2_(FJ611794)	100	1	0.00194932	0.00383959	0.00997315	0.000665557	0.00540123	0.00455864	0.0245063	0.0264729	0.00584795	0.00628571	0.00423918	0.00409146	0	0.00157916	0.0127389	0.0356083	0.00293974	0.00475907	0.00265353	0.00340136	0	0.0011646	0.00399521	0	0	0.00355492	0	0	0	0	0.0010395	0.00147783
OTU_69	571	Root	Bacteria	Firmicutes	.	Erysipelotrichia	.	Erysipelotrichales	.	Erysipelotrichaceae	.	Holdemanella	.	1	[Eubacterium]_biforme_DSM_3989_(M59230)	97.6	1	0.00146199	0.00298635	0.0118911	0.0143095	0	0	0	0	0	0	0	0	0.0183352	0.0165811	0	0	0.0142087	0.0190363	0.0159212	0.0123299	0	0	0	0	0	0	0	0	0	0	0.018711	0.0295567
OTU_33	568	Root	Bacteria	Firmicutes	.	.	.	.	.	.	.	.	.	0.95	Papillibacter_cinnamivorans_(T)_CIN1;_DSM12816_(AF167711)	89.7	1	0	0	0	0	0	0	0	0	0	0	0	0	0	0	0	0	0	0	0	0	0	0	0.0679185	0.0597731	0	0	0	0	0.0801688	0.0969163	0	0
OTU_35	562	Root	Bacteria	Firmicutes	.	Clostridia	.	Clostridiales	.	Lachnospiraceae	.	Blautia	.	0.96	Blautia_luti_(T)_bln9_(AJ133124)	99.6	1	0.00438596	0.00511945	0.00652091	0.0109817	0.00231481	0.00704517	0.0118963	0.0106411	0.00146199	0	0	0.00312876	0.00146681	0.00315831	0.00382166	0.00148368	0.010779	0.00535396	0.00265353	0.00340136	0.00463293	0.00543478	0.000399521	0.0004363	0.0016129	0.00213295	0	0	0	0	0.010395	0.0147783
OTU_34	539	Root	Bacteria	Firmicutes	.	Clostridia	.	Clostridiales	.	.	.	.	.	0.77	Gracilibacter_thermotolerans_(T)_JW/YJL-S1_(DQ117465)	89.8	1	0	0	0	0	0	0	0	0	0	0	0	0	0	0	0	0	0	0	0	0	0	0	0.068318	0.0846422	0	0	0	0	0.0531646	0.0317181	0	0
OTU_51	531	Root	Bacteria	Firmicutes	.	Clostridia	.	Clostridiales	.	Ruminococcaceae	.	Clostridium IV	.	0.98	Eubacterium_siraeum_strain_ATCC_29066_(L34625)	99.6	1	0	0	0.000767165	0	0	0	0	0	0.0716374	0.0651429	0.0167336	0.0158845	0	0	0	0	0	0	0	0	0	0	0.0171794	0.0196335	0	0	0	0	0.0160338	0.0114537	0	0
OTU_73	530	Root	Bacteria	Firmicutes	.	Clostridia	.	Clostridiales	.	Lachnospiraceae	.	Lachnospiracea_incertae_sedis	.	0.53	Eubacterium_ramulus_ATCC_29099_(L34623)	98.8	1	0	0.00170648	0.0023015	0.0093178	0	0	0.0195099	0.0020763	0.0141326	0	0	0.012515	0	0	0.0229299	0	0.0181284	0.00178465	0	0	0	0	0	0	0	0	0	0	0	0	0.00467775	0.0044335
OTU_36	509	Root	Bacteria	Firmicutes	.	Clostridia	.	Clostridiales	.	Ruminococcaceae	.	Ruminococcus	.	1	Ruminococcus_champanellensis_18P13_type_strain:_18P13_(AJ515913)	98	1	0.00682261	0.00767918	0.0149597	0.0186356	0.00308642	0.00414422	0	0	0	0	0	0	0.0227356	0.0244769	0.00764331	0.00593472	0.0137188	0.0202261	0.0121304	0.0140306	0	0	0	0	0	0	0	0	0	0	0.00935551	0.0108374
OTU_84	506	Root	Bacteria	Firmicutes	.	Clostridia	.	Clostridiales	.	Ruminococcaceae	.	Oscillibacter	.	0.86	Oscillibacter_valericigenes_(T)_Sjm18-20_(=_NBRC_101213)_(AB238598)	94.1	1	0.00925926	0.00426621	0.0023015	0.000998336	0.00848765	0.00580191	0	0	0	0.00171429	0.00803213	0.0108303	0.0267693	0.0157916	0.0191083	0.00890208	0.00734934	0.00892326	0.00644428	0.00765306	0	0	0	0	0	0	0	0	0	0	0.0150728	0.0118227
OTU_58	486	Root	Bacteria	Firmicutes	.	Clostridia	.	Clostridiales	.	Lachnospiraceae	.	.	.	0.93	Lachnoclostridium_pacaense_strain_Marseille-P3100_(NR_147396.1)	94.9	1	0.00438596	0.00725256	0.00191791	0	0.0104167	0.0132615	0.00499643	0.00856475	0.00341131	0.00514286	0.00223115	0.00505415	0.00623396	0.00513225	0.00382166	0.00890208	0.00293974	0.00237954	0.00113723	0.00170068	0.0110478	0.013587	0	0	0.0148387	0.0110203	0	0	0	0	0.00675676	0.00738916
OTU_37	475	Root	Bacteria	Firmicutes	.	Erysipelotrichia	.	Erysipelotrichales	.	Erysipelotrichaceae	.	Clostridium XVIII	.	0.75	Clostridium_saccharogumia_(T)_SDG-Mt85-3Db_(DQ100445)	93.3	1	0.00925926	0.00767918	0.00498657	0.00732113	0.0131173	0.0132615	0	0	0.00730994	0.00628571	0.00557787	0.00361011	0	0.000789578	0.0178344	0.0074184	0.00391965	0.00475907	0.00227445	0.00467687	0	0	0	0	0	0	0	0	0	0	0	0
OTU_82	464	Root	Bacteria	Bacteroidetes	.	Bacteroidia	.	Bacteroidales	.	Porphyromonadaceae	.	Barnesiella	.	1	Barnesiella_intestinihominis_(T)_YIT_11860_(AB370251)	98	1	0.00730994	0.00895904	0.0126582	0.0146423	0.00694444	0.00828844	0.00523436	0.00285492	0	0	0.00267738	0.00529483	0.0113678	0.0110541	0	0	0.00979912	0.00951814	0.0090978	0.0114796	0	0	0	0	0	0	0	0	0	0	0.0244283	0.0246305
OTU_39	455	Root	Bacteria	Firmicutes	.	Clostridia	.	Clostridiales	.	Lachnospiraceae	.	Lachnospiracea_incertae_sedis	.	0.58	Anaerobium_acetethylicum_strain_GluBS11_(NR_137405.1)	96.8	1	0	0	0	0	0	0	0	0	0	0	0	0	0	0	0	0	0	0	0	0	0	0	0.0487415	0.0458115	0	0	0	0	0.0405063	0.030837	0	0
OTU_59	440	Root	Bacteria	Firmicutes	.	Clostridia	.	Clostridiales	.	Ruminococcaceae	.	.	.	0.67	Eubacterium_coprostanoligenes_(T)_HL_(HM037995)	94.5	1	0.0112086	0.0115188	0.0391254	0.037604	0	0.00165769	0	0	0.0141326	0.016	0	0.0045728	0.00550055	0.00671141	0	0	0.00538951	0.010113	0.00720243	0.00680272	0	0	0	0	0	0	0	0	0	0	0	0
OTU_40	436	Root	Bacteria	Firmicutes	.	.	.	.	.	.	.	.	.	0.75	Gracilibacter_thermotolerans_(T)_JW/YJL-S1_(DQ117465)	86.6	1	0.0180312	0.0136519	0.0306866	0.0332779	0.00655864	0.00497306	0	0	0.0141326	0.0165714	0.00580098	0.00842359	0.00476714	0.00315831	0	0	0	0.00594884	0.0030326	0	0	0	0	0	0	0	0	0	0	0	0	0
OTU_49	422	Root	Bacteria	Bacteroidetes	.	Bacteroidia	.	Bacteroidales	.	Bacteroidaceae	.	Bacteroides	.	1	Bacteroides_cellulosilyticus_strain_JCM_15632_(NR_112933.1)	100	3	0.00536062	0.0119454	0.0199463	0.0302829	0.00270062	0.00165769	0.00118963	0	0.00438596	0.00457143	0.00825524	0.00986763	0	0	0	0	0.00293974	0.00297442	0.00379075	0.00127551	0	0	0.00759089	0.0113438	0	0	0	0	0.00759494	0.0281938	0.0031185	0.00197044
OTU_42	417	Root	Bacteria	Firmicutes	.	Clostridia	.	Clostridiales	.	Peptostreptococcaceae	.	Romboutsia	.	0.96	Romboutsia_timonensis_strain_DR1_(NR_144740.1)	100	1	0	0	0.00345224	0.00432612	0.00270062	0	0.00713776	0.00622891	0	0.00171429	0.000669344	0	0	0	0.011465	0.00296736	0	0	0	0	0.010335	0.00970497	0.00319616	0.0052356	0.0122581	0.00817632	0	0	0	0	0.0135135	0.0118227
OTU_41	408	Root	Bacteria	Bacteroidetes	.	Bacteroidia	.	Bacteroidales	.	.	.	.	.	0.58	*	0	1	0	0	0	0	0	0	0	0	0	0	0	0	0.0359369	0.0402685	0	0	0.022048	0.0285544	0.0261562	0.0191327	0	0	0	0	0	0	0	0	0	0	0	0
OTU_61	385	Root	Bacteria	Firmicutes	.	Clostridia	.	Clostridiales	.	Lachnospiraceae	.	Clostridium XlVa	.	0.55	Lachnospira_pectinoschiza_strain_150-1_(NR_118667.1)	100	1	0.0107212	0.00853242	0.0222478	0.0156406	0.00925926	0.00414422	0.00333095	0.00285492	0	0.000571429	0.00200803	0.00144404	0.00183352	0.00552704	0	0	0.000489956	0	0.00113723	0	0.00605845	0.00582298	0	0.0013089	0.0016129	0.00497689	0.00157683	0.00255795	0	0	0	0
OTU_43	381	Root	Bacteria	Bacteroidetes	.	Bacteroidia	.	Bacteroidales	.	Prevotellaceae	.	Prevotella	.	0.99	Prevotella_oris_strain_ATCC_33573_(L16474)	91.3	1	0	0	0	0	0	0	0	0	0	0	0	0	0	0	0	0	0	0	0	0	0	0	0	0	0	0	0	0	0	0	0	0
OTU_54	379	Root	Bacteria	Firmicutes	.	Clostridia	.	Clostridiales	.	Ruminococcaceae	.	Ruminococcus	.	0.74	Ruminococcus_bromii_(T)_ATCC_27255_(L76600)	98.4	1	0	0.00298635	0	0	0	0	0	0.000778614	0	0	0	0	0.00733407	0.0106593	0.00382166	0.0074184	0.0289074	0.0285544	0.0284306	0.0212585	0	0	0	0	0	0	0	0	0	0	0.018711	0.0152709
OTU_91	369	Root	Bacteria	Bacteroidetes	.	Bacteroidia	.	Bacteroidales	.	Bacteroidaceae	.	Bacteroides	.	1	Bacteroides_eggerthii_(T)_DSM_20697T_(AB050107)	100	1	0.0107212	0.0234642	0	0.00133111	0.0154321	0.0140903	0.0204616	0.0163509	0	0	0	0	0	0	0	0	0	0	0	0	0	0	0	0	0	0	0	0	0	0	0	0
OTU_48	368	Root	Bacteria	Firmicutes	.	Clostridia	.	Clostridiales	.	Lachnospiraceae	.	Dorea	.	0.98	Dorea_longicatena_(T)_III-35_(AJ132842)	99.6	1	0.00194932	0	0.00268508	0.00199667	0	0.00290095	0.00523436	0.0137555	0.00341131	0.00285714	0.00245426	0.00120337	0.00550055	0.00197394	0	0.00148368	0.00195982	0.00178465	0.00227445	0.00297619	0	0	0	0	0	0	0	0	0	0	0.00571726	0.00246305
OTU_89	361	Root	Bacteria	Firmicutes	.	Clostridia	.	Clostridiales	.	Lachnospiraceae	.	Fusicatenibacter	.	0.58	Fusicatenibacter_saccharivorans_HT03-11_(AB698910)	96.4	1	0.0175439	0.0140785	0.0088224	0.00698835	0.0119599	0.00538748	0.0028551	0.00674799	0.00779727	0.00342857	0.00379295	0.00264741	0.00110011	0.00552704	0	0	0	0	0.00075815	0.00212585	0	0	0.0111866	0.0122164	0	0	0	0	0.0151899	0	0.0031185	0.00147783
OTU_78	361	Root	Bacteria	Firmicutes	.	Clostridia	.	Clostridiales	.	Lachnospiraceae	.	Coprococcus	.	1	Coprococcus_eutactus_(T)_ATCC_27759_(EF031543)	99.6	1	0	0	0	0	0	0	0	0	0	0.00171429	0.00513164	0.00288809	0.0550055	0.0540861	0	0	0.00293974	0.0035693	0.00530705	0.00212585	0	0	0	0	0	0	0	0	0	0	0	0
OTU_50	356	Root	Bacteria	Bacteroidetes	.	Bacteroidia	.	Bacteroidales	.	Bacteroidaceae	.	Bacteroides	.	1	Bacteroides_nordii_(T)_WAL_11050_(AY608697)	99.6	1	0	0	0	0	0	0	0	0	0	0	0	0	0	0	0	0	0	0	0	0	0	0	0.00559329	0.0047993	0	0	0	0	0.0160338	0.00881057	0	0
OTU_45	331	Root	Bacteria	Bacteroidetes	.	Bacteroidia	.	Bacteroidales	.	Prevotellaceae	.	Prevotella	.	1	Massiliprevotella_massiliensis_strain_Marseille-P2439_(NR_147404.1)	100	1	0	0	0	0	0	0	0	0	0	0	0	0	0.0146681	0.0169759	0	0	0.0264576	0.0380726	0.0318423	0.0195578	0	0	0	0	0	0	0	0	0	0	0	0
OTU_57	331	Root	Bacteria	Firmicutes	.	Clostridia	.	Clostridiales	.	Ruminococcaceae	.	Clostridium IV	.	0.6	Sporobacter_termitidis_(T)_SYR_(Z49863)	94.1	1	0	0	0.0023015	0.00266223	0	0	0	0	0	0	0	0	0.00623396	0.00592183	0	0	0.00538951	0	0	0.00042517	0	0	0.0403516	0.0362129	0	0	0	0	0.0270042	0.0325991	0	0
OTU_66	324	Root	Bacteria	Firmicutes	.	Clostridia	.	Clostridiales	.	Lachnospiraceae	.	.	.	1	Clostridium_herbivorans_(T)_54408_(L34418)	95.7	1	0	0	0	0	0	0	0	0	0	0	0	0	0	0	0	0	0	0	0	0	0	0	0	0	0	0	0	0	0	0	0	0
OTU_47	323	Root	Bacteria	Coriobacteriia	.	Actinobacteria	Coriobacteridae	Coriobacteriales	Coriobacterineae	Coriobacteriaceae	.	Collinsella	.	1	Collinsella_aerofaciens_strain_JCM_10188_(NR_113316.1)	100	1	0	0.00213311	0.00460299	0.00332779	0.00347222	0	0.0116583	0.0140151	0.00341131	0	0.00267738	0.00264741	0.00403374	0	0.00636943	0	0.00832925	0.00832838	0.0060652	0.00595238	0	0	0	0	0	0	0	0	0	0	0.014553	0.0108374
OTU_87	319	Root	Bacteria	Proteobacteria	.	Betaproteobacteria	.	Burkholderiales	.	.	.	.	.	0.69	Duodenibacillus_massiliensis_strain_Marseille-P2968_(NR_147381.1)	100	1	0.00146199	0.00255973	0.00690449	0.0093178	0	0	0	0	0.00925926	0.00971429	0.00356983	0.00505415	0	0	0	0	0	0	0	0	0	0	0	0	0	0	0	0	0	0	0.004158	0.00295567
OTU_83	318	Root	Bacteria	Firmicutes	.	Clostridia	.	Clostridiales	.	Ruminococcaceae	.	Oscillibacter	.	0.98	Oscillibacter_sp._GH1_(JF750939)	92.9	1	0.0082846	0.00639932	0	0.00266223	0.00617284	0.00455864	0	0	0	0	0.00937082	0.010349	0.0132013	0.00986972	0	0	0.00685938	0.00654372	0.00985595	0.00892857	0	0	0	0	0	0	0	0	0	0	0	0.00246305
OTU_53	316	Root	Bacteria	Bacteroidetes	.	Bacteroidia	.	Bacteroidales	.	Bacteroidaceae	.	Bacteroides	.	1	Bacteroides_coprophilus_(T)_CB42_(=_JCM_13818,_=_DSM_18228)_(AB260026)	100	1	0.0170565	0.0115188	0.0291523	0.0276206	0.00925926	0	0	0	0	0	0	0	0	0	0.00764331	0.0207715	0	0	0	0	0	0	0	0	0	0	0	0	0	0	0	0
OTU_52	314	Root	Bacteria	Firmicutes	.	Clostridia	.	Clostridiales	.	Lachnospiraceae	.	Lachnospiracea_incertae_sedis	.	0.68	Eubacterium_eligens_(T)_(L34420)	94.1	1	0.00243665	0.00469283	0.0111239	0.00199667	0.00308642	0.00248653	0.00737568	0.0054503	0.000974659	0	0.00379295	0.00216606	0.00330033	0.00276352	0.0127389	0.0118694	0.00930916	0.00713861	0.00530705	0.00467687	0	0	0.00159808	0	0	0	0	0	0	0	0	0
OTU_55	314	Root	Bacteria	Firmicutes	.	Clostridia	.	Clostridiales	.	Ruminococcaceae	.	.	.	0.63	Clostridium_stercorarium_(T)_DSM_8532T_(AJ310082)	89.7	4	0.00438596	0.000853242	0	0.00199667	0.00270062	0.00538748	0.00333095	0.00622891	0.00925926	0.00914286	0.0015618	0.000722022	0.00256692	0.00276352	0	0.0103858	0	0	0	0	0	0	0	0	0	0	0	0	0	0	0.00883576	0.00541872
OTU_74	307	Root	Bacteria	Firmicutes	.	Clostridia	.	Clostridiales	.	Ruminococcaceae	.	Faecalibacterium	.	0.77	Faecalibacterium_prausnitzii_(T)_ATCC_27768_(AJ413954)	95.7	1	0.00682261	0.00725256	0	0	0.00462963	0.00621633	0.00547228	0.00467168	0.000974659	0.004	0.00490852	0.00240674	0.00623396	0.00473747	0.0152866	0.0074184	0.00734934	0	0.00075815	0.00595238	0	0	0.0019976	0.0013089	0	0	0	0	0	0	0.0181913	0.008867
OTU_60	301	Root	Bacteria	Firmicutes	.	Clostridia	.	Clostridiales	.	Lachnospiraceae	.	.	.	1	Clostridium_sp._UB-B.2_(HE603919)	96	1	0	0	0	0	0	0	0	0	0	0	0	0	0	0	0	0	0	0	0	0	0	0	0.0339592	0.0375218	0	0	0	0	0.0464135	0.0440529	0	0
OTU_71	299	Root	Bacteria	Firmicutes	.	Bacilli	.	Lactobacillales	.	Streptococcaceae	.	Streptococcus	.	1	Streptococcus_salivarius_(T)_ATCC_7073_(AY188352)	100	3	0.00389864	0.00511945	0	0	0	0	0	0	0.00146199	0	0	0	0	0	0.00764331	0.0163205	0.00734934	0	0.00568613	0.00510204	0	0	0	0	0	0	0.00329702	0.00351719	0	0	0.00623701	0.00344828
OTU_56	297	Root	Bacteria	Firmicutes	.	Clostridia	.	Clostridiales	.	Lachnospiraceae	.	.	.	1	Ruminococcus_lactaris_(T)_ATCC_29176_(L76602)	96.4	1	0	0.00255973	0	0	0.00462963	0.00828844	0.0102308	0.0153127	0	0	0	0	0.00110011	0.00157916	0.0127389	0.0356083	0.00391965	0.0118977	0.00720243	0.00722789	0	0	0.000799041	0.0021815	0	0	0	0	0	0	0	0
OTU_62	277	Root	Bacteria	Firmicutes	.	Clostridia	.	Clostridiales	.	Lachnospiraceae	.	Lachnospiracea_incertae_sedis	.	0.98	Eubacterium_ventriosum_strain_ATCC_27560_(L34421)	100	1	0.00925926	0.00767918	0.00268508	0.00299501	0.0111883	0.00994613	0.00880324	0.010122	0.00487329	0.00571429	0.00133869	0.00216606	0	0	0	0	0	0	0	0.00127551	0	0	0	0	0	0	0	0	0	0	0.00519751	0.00591133
OTU_72	276	Root	Bacteria	Firmicutes	.	Clostridia	.	Clostridiales	.	Lachnospiraceae	.	Lachnospiracea_incertae_sedis	.	0.92	Eubacterium_hallii_strain_ATCC_27751_(L34621)	100	1	0.00146199	0	0.00306866	0.00332779	0	0.00207211	0.00356888	0.00493122	0.00243665	0.004	0.00557787	0.00577617	0	0.000394789	0.0127389	0.0118694	0.00391965	0.00535396	0.00833965	0.00722789	0	0	0	0	0	0	0	0	0	0	0.00571726	0.0044335
OTU_191	272	Root	Bacteria	Bacteroidetes	.	Bacteroidia	.	Bacteroidales	.	Bacteroidaceae	.	Bacteroides	.	0.99	Bacteroides_ovatus_strain_JCM5824_(NR_116181.1)	97.6	2	0	0	0	0	0	0.0169913	0	0	0	0.00285714	0.000223115	0	0	0	0	0	0	0	0	0	0.0263721	0	0	0	0	0.0270174	0	0	0	0	0	0
OTU_64	261	Root	Bacteria	Firmicutes	.	Clostridia	.	Clostridiales	.	Lachnospiraceae	.	Coprococcus	.	1	Coprococcus_catus_(T)_VPI-C6-61_(AB038359)	99.6	1	0	0	0.00306866	0.00199667	0.000385802	0.000828844	0.00594813	0.00726706	0.00194932	0	0.00312361	0.000240674	0	0	0	0	0.0044096	0.00773349	0.00341168	0.00170068	0	0	0	0	0	0	0	0	0	0	0.00883576	0
OTU_63	259	Root	Bacteria	Firmicutes	.	Clostridia	.	Clostridiales	.	Lachnospiraceae	.	.	.	0.99	Clostridium_saccharolyticum_(T)_DSM_2544_(Y18185)	95.7	7	0	0	0	0	0	0	0	0	0	0	0	0	0	0	0	0	0.00244978	0	0	0	0	0	0	0	0	0	0.0182053	0.0203038	0	0	0	0
OTU_67	257	Root	Bacteria	Firmicutes	.	Clostridia	.	Clostridiales	.	Lachnospiraceae	.	Blautia	.	1	Blautia_faecis_(T)_M25_(HM626178)	100	1	0.00536062	0.00554608	0.0122746	0.0063228	0.00694444	0.0095317	0.0142755	0.00519076	0	0	0.000892459	0.00288809	0	0	0	0	0	0	0	0	0	0	0	0	0	0	0	0	0	0	0.002079	0.00837438
OTU_65	244	Root	Bacteria	Firmicutes	.	Clostridia	.	Clostridiales	.	Lachnospiraceae	.	Clostridium XlVa	.	0.78	Clostridium_sp._UB-B.2_(HE603919)	97.2	1	0.00146199	0.000426621	0.00383583	0.00366057	0	0	0.0102308	0.00882429	0.000487329	0.00285714	0.00178492	0.000240674	0.00110011	0.00236873	0.00382166	0.00445104	0	0.00237954	0.00075815	0.00212585	0	0	0	0	0	0	0	0	0	0	0.002079	0
OTU_68	236	Root	Bacteria	Firmicutes	.	Negativicutes	.	Selenomonadales	.	Veillonellaceae	.	Dialister	.	0.97	Dialister_pneumosintes_(T)_ATCC_33048_(X82500)	96.4	2	0	0	0	0	0	0	0	0	0	0	0	0	0	0	0.0471338	0.0548961	0.00146987	0.00237954	0.00265353	0	0	0	0	0	0	0	0	0	0	0	0	0
OTU_75	227	Root	Bacteria	Firmicutes	.	Clostridia	.	Clostridiales	.	Lachnospiraceae	.	.	.	0.89	Acetivibrio_ethanolgignens_type_strain:_DSM_3005_(FR749897)	96	3	0	0	0	0	0	0	0	0	0	0	0	0	0.0113678	0.0228977	0.0127389	0.0178042	0.0102891	0.00951814	0.010235	0.00637755	0	0	0	0	0	0	0	0	0	0	0	0
OTU_79	225	Root	Bacteria	Proteobacteria	.	Betaproteobacteria	.	Burkholderiales	.	Sutterellaceae	.	Sutterella	.	1	Sutterella_massiliensis_strain_Marseille-P2435_(NR_147401.1)	100	2	0	0	0	0.000665557	0	0	0.0290269	0.0262133	0	0	0	0	0	0	0	0	0	0	0	0	0	0	0	0	0	0	0	0	0	0	0	0
OTU_140	213	Root	Bacteria	Firmicutes	.	Clostridia	.	Clostridiales	.	Lachnospiraceae	.	.	.	1	Anaerobium_acetethylicum_strain_GluBS11_(NR_137405.1)	96	1	0.0248538	0.0217577	0	0	0.0231481	0.0211355	0	0	0	0	0	0	0	0	0	0	0	0	0	0	0	0	0	0	0	0	0	0	0	0	0	0
OTU_70	208	Root	Bacteria	Firmicutes	.	Negativicutes	.	Selenomonadales	.	Veillonellaceae	.	Megasphaera	.	1	Megasphaera_elsdenii_strain_DSM_20460_(NR_102980.1)	100	1	0	0	0	0	0	0	0	0	0	0	0	0	0	0	0	0.00296736	0	0	0	0	0	0	0	0	0	0	0	0	0	0	0	0
OTU_97	199	Root	Bacteria	Bacteroidetes	.	Bacteroidia	.	Bacteroidales	.	Porphyromonadaceae	.	Butyricimonas	.	1	Butyricimonas_paravirosa_214-4_(AB916502)	98	2	0	0	0	0.000665557	0	0	0	0	0.00877193	0.0102857	0.0153949	0.0129964	0	0.00236873	0	0	0.00195982	0.00416419	0.0030326	0.00297619	0	0	0	0	0	0	0	0	0	0.00264317	0	0.00147783
OTU_90	187	Root	Bacteria	Firmicutes	.	Clostridia	.	Clostridiales	.	Peptostreptococcaceae	.	Intestinibacter	.	0.88	Clostridium_bartlettii_(T)_WAL_16138_(AY438672)	100	1	0	0	0	0	0	0	0	0	0	0	0	0	0	0	0.00509554	0.0103858	0	0	0	0	0	0	0.00279664	0.0021815	0	0	0.00817087	0.00671463	0	0	0.0031185	0.00492611
OTU_77	184	Root	Bacteria	Proteobacteria	.	Alphaproteobacteria	.	Rhodospirillales	.	Rhodospirillaceae	.	.	.	0.62	Kiloniella_litopenaei_strain_P1-1_(NR_148331.1)	85.8	1	0	0	0	0	0	0	0	0	0.0194932	0.0211429	0.00669344	0.00649819	0	0	0	0	0	0	0	0	0	0	0.00759089	0.004363	0	0	0	0	0.0118143	0.0061674	0	0
OTU_80	179	Root	Bacteria	Firmicutes	.	Erysipelotrichia	.	Erysipelotrichales	.	Erysipelotrichaceae	.	Catenibacterium	.	0.84	Catenibacterium_mitsuokai_(T)_JCM_10609_(AB030224)	96.4	1	0	0	0	0	0	0	0	0	0	0	0	0	0	0	0	0	0	0	0	0	0	0	0	0	0	0	0	0	0	0	0.00883576	0.00985222
OTU_81	175	Root	Bacteria	Firmicutes	.	Clostridia	.	Clostridiales	.	Ruminococcaceae	.	Butyricicoccus	.	0.9	Eubacterium_desmolans_strain_ATCC_43058_(L34618)	99.6	1	0	0	0	0	0.00115741	0	0.01261	0.0111601	0	0	0	0	0	0	0.0203822	0.0148368	0	0.00297442	0.00189538	0	0	0	0	0	0	0	0	0	0	0	0	0
OTU_108	173	Root	Bacteria	Firmicutes	.	Clostridia	.	Clostridiales	.	Lachnospiraceae	.	Blautia	.	1	Blautia_stercoris_GAM6-1_(HM626177)	100	1	0	0	0	0	0	0	0	0	0	0	0	0	0	0	0.00254777	0	0	0	0	0	0	0	0.0019976	0.0047993	0.000967742	0	0.00387041	0.00431655	0	0	0	0
OTU_154	170	Root	Bacteria	Firmicutes	.	Clostridia	.	Clostridiales	.	Lachnospiraceae	.	Lachnospiracea_incertae_sedis	.	0.71	Eubacterium_xylanophilum_strain_ATCC_35991_(L34628)	98.4	1	0.00584795	0.00341297	0.0122746	0.0306156	0.00192901	0.00704517	0	0	0	0	0	0	0.00146681	0	0	0	0	0	0	0	0	0	0	0	0	0	0	0	0	0	0	0
OTU_86	165	Root	Bacteria	Firmicutes	.	Clostridia	.	Clostridiales	.	Lachnospiraceae	.	Lachnospiracea_incertae_sedis	.	0.81	Eubacterium_xylanophilum_strain_ATCC_35991_(L34628)	97.6	1	0.00974659	0.0081058	0	0	0.00617284	0.00704517	0	0	0.00730994	0.00857143	0.00423918	0.00481348	0.00440044	0.00473747	0	0	0	0	0	0	0	0	0	0	0	0	0	0	0	0	0	0
OTU_237	163	Root	Bacteria	Firmicutes	.	Clostridia	.	Clostridiales	.	Ruminococcaceae	.	Butyricicoccus	.	0.74	Eubacterium_desmolans_strain_ATCC_43058_(L34618)	97.2	1	0	0.000426621	0	0	0.000771605	0.00165769	0.00309303	0.0020763	0.00438596	0.00114286	0.00178492	0.000962696	0.000733407	0.00236873	0	0	0	0	0.00075815	0.00212585	0	0	0	0	0	0	0	0	0	0	0.004158	0.00394089
OTU_94	162	Root	Bacteria	Firmicutes	.	Clostridia	.	Clostridiales	.	Ruminococcaceae	.	Intestinimonas	.	0.82	Intestinimonas_butyriciproducens_SRB-521-5-I_(KC311367)	96.8	1	0	0	0	0	0	0	0	0	0	0	0	0	0	0	0	0	0	0	0	0	0	0	0.0131842	0.0327225	0	0	0	0	0.0185654	0.0246696	0	0
OTU_85	155	Root	Bacteria	Firmicutes	.	Clostridia	.	Clostridiales	.	Lachnospiraceae	.	Lachnospiracea_incertae_sedis	.	0.58	Eubacterium_ruminantium_(T)_GA195_(AB008552)	96.8	1	0	0	0	0	0	0	0	0	0	0	0	0	0.00880088	0.0146072	0.0229299	0.0207715	0.00244978	0	0	0.00340136	0	0	0	0	0	0	0	0	0	0	0	0
OTU_116	152	Root	Bacteria	Firmicutes	.	Clostridia	.	Clostridiales	.	Lachnospiraceae	.	.	.	1	Lachnoclostridium_pacaense_strain_Marseille-P3100_(NR_147396.1)	95.7	1	0	0	0	0	0	0	0	0	0	0	0	0	0	0	0	0	0	0	0	0	0	0	0.0203755	0.0209424	0	0	0	0	0.0151899	0.0290749	0	0
OTU_99	147	Root	Bacteria	Proteobacteria	.	Deltaproteobacteria	.	Desulfovibrionales	.	Desulfovibrionaceae	.	Bilophila	.	1	Bilophila_wadsworthia_(T)_7959_(AJ867049)	100	1	0	0.00469283	0	0.00199667	0.00501543	0.00414422	0.00713776	0.00363353	0	0	0.00245426	0.00361011	0	0	0	0	0	0	0	0	0	0	0.00159808	0.0030541	0	0	0	0	0.00843882	0.00528634	0.004158	0.000985222
OTU_96	144	Root	Bacteria	Firmicutes	.	Clostridia	.	Clostridiales	.	Lachnospiraceae	.	Clostridium XlVa	.	0.67	Clostridium_methoxybenzovorans_(T)_SR3;_DSM_12182_(AF067965)	97.2	2	0	0.000853242	0.00115075	0.00232945	0	0.000828844	0.00166548	0.000519076	0	0.00171429	0.00111557	0.000962696	0.00293363	0.00236873	0.00636943	0.0118694	0	0.00237954	0.000379075	0.00170068	0	0.000776398	0	0	0	0	0	0	0	0	0	0
OTU_92	143	Root	Bacteria	Firmicutes	.	Clostridia	.	Clostridiales	.	Ruminococcaceae	.	Ruminococcus	.	0.78	Ruminococcus_champanellensis_18P13_type_strain:_18P13_(AJ515913)	96	1	0	0	0	0	0	0	0	0	0	0	0	0	0	0	0	0	0	0	0	0	0	0	0.0139832	0.0148342	0	0	0	0	0.0261603	0.0299559	0	0
OTU_88	140	Root	Bacteria	Firmicutes	.	Clostridia	.	Clostridiales	.	Lachnospiraceae	.	Ruminococcus2	.	0.87	Ruminococcus_lactaris_(T)_ATCC_29176_(L76602)	100	1	0.00146199	0.00213311	0.0023015	0.00299501	0	0	0	0	0.00584795	0.004	0.00490852	0.00361011	0.00183352	0	0	0	0	0	0.0030326	0	0	0	0.00239712	0.0004363	0	0	0	0	0	0	0	0
OTU_193	133	Root	Bacteria	Firmicutes	.	Clostridia	.	Clostridiales	.	Ruminococcaceae	.	Ruminococcus	.	1	Ruminococcus_champanellensis_18P13_type_strain:_18P13_(AJ515913)	98.8	1	0	0	0	0	0	0	0	0	0.00779727	0.0142857	0.0104864	0.00770156	0	0	0	0	0	0	0	0	0	0	0.00279664	0	0	0	0	0	0	0.00528634	0	0
OTU_95	130	Root	Bacteria	Firmicutes	.	Clostridia	.	Clostridiales	.	Ruminococcaceae	.	.	.	0.89	Ruminococcus_bromii_(T)_ATCC_27255_(L76600)	94.9	1	0.00341131	0	0.0199463	0.0126456	0.000771605	0.00207211	0	0	0	0.00571429	0.00223115	0.00144404	0	0	0	0	0	0	0	0	0	0	0	0	0	0	0	0	0	0	0	0
OTU_101	128	Root	Bacteria	Firmicutes	.	Clostridia	.	Clostridiales	.	Ruminococcaceae	.	Sporobacter	.	0.54	Flintibacter_butyricus_strain_BLS21_(NR_144611.1)	92.5	2	0.00877193	0.00767918	0.0023015	0.00266223	0	0.00331538	0	0	0.00194932	0.004	0	0.0055355	0.00366703	0.00315831	0	0	0.000489956	0	0	0.00637755	0	0	0	0	0	0	0	0	0	0	0	0
OTU_93	126	Root	Bacteria	Firmicutes	.	Negativicutes	.	Selenomonadales	.	Veillonellaceae	.	Veillonella	.	1	Veillonella_ratti_strain_JCM_6512_(NR_113377.1)	100	3	0	0	0	0	0	0	0	0	0	0	0	0	0	0	0	0	0	0	0	0	0.00962224	0.0131988	0	0	0.0109677	0.0103093	0.000286697	0	0	0	0	0
OTU_123	126	Root	Bacteria	Firmicutes	.	Clostridia	.	Clostridiales	.	.	.	.	.	0.92	Clostridium_jejuense_(T)_HY-35-12_(AY494606)	88.5	1	0	0	0	0	0	0	0	0	0	0	0	0	0	0	0	0	0	0	0	0	0	0	0.0155813	0.0213787	0	0	0	0	0.014346	0.015859	0	0
OTU_114	126	Root	Bacteria	Bacteroidetes	.	Bacteroidia	.	Bacteroidales	.	Bacteroidaceae	.	Bacteroides	.	1	Bacteroides_mediterraneensis_strain_Marseille-P2644_(NR_144744.1)	99.2	1	0	0	0	0	0	0	0	0	0	0	0	0	0	0	0	0	0	0	0	0	0	0	0	0	0	0	0	0	0	0	0	0
OTU_100	119	Root	Bacteria	Proteobacteria	.	Betaproteobacteria	.	Burkholderiales	.	Sutterellaceae	.	Parasutterella	.	1	Parasutterella_excrementihominis_(T)_YIT_11859_(=_JCM_15078,_=_DSM_21040)_(AB370250)	100	1	0.00877193	0.0081058	0.00153433	0.00199667	0	0	0	0	0	0	0	0	0	0	0	0	0	0	0	0	0	0	0	0.0021815	0	0	0	0	0	0	0	0
OTU_104	117	Root	Bacteria	Firmicutes	.	Clostridia	.	Clostridiales	.	Ruminococcaceae	.	Flavonifractor	.	1	Flavonifractor_plautii_(T)_CCUG_28093;_ATCC_29863_(AY724678)	100	1	0	0	0	0	0.00231481	0	0.00356888	0.00337399	0	0	0	0	0	0	0.00254777	0	0	0	0	0	0	0	0	0	0.000322581	0	0.00229358	0.00335731	0	0	0	0
OTU_109	116	Root	Bacteria	Firmicutes	.	Clostridia	.	Clostridiales	.	Lachnospiraceae	.	Clostridium XlVb	.	0.98	Clostridium_lactatifermentans_(T)_G17_(AY033434)	95.7	1	0.00292398	0.00426621	0	0.00232945	0.00424383	0.0037298	0	0	0	0.00171429	0.000669344	0.00144404	0	0	0.00764331	0	0.000979912	0	0.0015163	0	0	0	0	0	0	0	0	0	0	0	0.00675676	0.00837438
OTU_165	113	Root	Bacteria	Firmicutes	.	Clostridia	.	Clostridiales	.	Lachnospiraceae	.	Clostridium XlVa	.	0.96	Clostridium_lavalense_(T)_CCRI-9842_(EF564277)	99.2	2	0	0	0	0	0	0	0	0	0	0	0	0	0	0	0	0	0	0	0	0	0	0	0.0207751	0.0100349	0	0	0	0.00607514	0	0	0	0
OTU_105	113	Root	Bacteria	Firmicutes	.	Clostridia	.	Clostridiales	.	Lachnospiraceae	.	Blautia	.	1	Blautia_obeum_(T)_(X85101)	100	1	0.00487329	0.00341297	0.000383583	0.000998336	0.00385802	0.00455864	0	0.000519076	0.00292398	0.00285714	0.00223115	0.00240674	0.00366703	0.00157916	0	0.0133531	0	0	0	0.00212585	0	0	0	0	0	0	0	0	0	0	0	0.00197044
OTU_98	112	Root	Bacteria	Verrucomicrobia	.	Verrucomicrobiae	.	Verrucomicrobiales	.	Verrucomicrobiaceae	.	Akkermansia	.	1	Akkermansia_muciniphila_(T)_Muc_(AY271254)	100	1	0	0	0.00191791	0.00232945	0	0	0	0	0	0	0	0	0	0	0	0	0	0	0	0	0	0	0.0195765	0.0113438	0	0	0	0	0.0126582	0.0061674	0	0
OTU_103	108	Root	Bacteria	Firmicutes	.	Clostridia	.	Clostridiales	.	Ruminococcaceae	.	.	.	0.94	Eubacterium_coprostanoligenes_(T)_HL_(HM037995)	91.3	1	0.00146199	0.00170648	0	0	0	0	0	0	0	0	0	0	0.0139347	0.0134228	0	0	0.00195982	0.00237954	0.00113723	0.00340136	0	0	0	0	0	0	0	0	0	0	0	0
OTU_243	107	Root	Bacteria	Firmicutes	.	Clostridia	.	Clostridiales	.	Lachnospiraceae	.	.	.	1	Blautia_caecimuris_strain_SJ18_(NR_144607.1)	98.8	1	0	0	0	0	0	0	0	0	0	0	0	0	0	0	0	0	0	0	0	0	0.00392017	0	0	0	0.00258065	0.00355492	0.00587729	0.00527578	0	0	0	0
OTU_124	106	Root	Bacteria	Firmicutes	.	Clostridia	.	Clostridiales	.	Lachnospiraceae	.	.	.	1	Drancourtella_massiliensis_strain_GD1_(NR_144722.1)	96.8	1	0	0	0	0	0	0	0	0	0	0	0	0	0	0	0	0	0	0	0	0	0	0	0	0	0	0	0.0100344	0.0057554	0	0	0	0
OTU_106	106	Root	Bacteria	Firmicutes	.	Clostridia	.	Clostridiales	.	Ruminococcaceae	.	Clostridium IV	.	0.84	Eubacterium_siraeum_strain_ATCC_29066_(L34625)	94.9	1	0.00730994	0.00469283	0.0145761	0.0106489	0.00385802	0	0	0	0	0	0	0	0	0	0	0	0	0	0	0	0	0	0	0	0	0	0	0	0	0	0	0
OTU_102	104	Root	Bacteria	Firmicutes	.	Clostridia	.	Clostridiales	.	Lachnospiraceae	.	.	.	0.98	Blautia_schinkii_(T)_Bie_41_(X94964)	94.5	3	0	0	0	0	0	0	0	0	0	0	0	0	0	0	0	0	0	0	0	0	0	0	0.00759089	0.0074171	0	0	0	0	0.0345992	0.0229075	0	0
OTU_107	103	Root	Bacteria	Firmicutes	.	Clostridia	.	Clostridiales	.	.	.	.	.	0.89	Vallitalea_pronyensis_FatNI3_(KC876639)	90.1	1	0.00292398	0.00127986	0.0130418	0.01797	0.00115741	0.00124327	0	0	0	0	0	0	0	0	0	0	0	0	0	0	0	0	0	0	0	0	0	0	0	0	0	0
OTU_111	102	Root	Bacteria	Firmicutes	.	Clostridia	.	Clostridiales	.	Ruminococcaceae	.	.	.	0.86	Flintibacter_butyricus_strain_BLS21_(NR_144611.1)	96.8	1	0.00389864	0.00213311	0.0023015	0	0.00617284	0.00124327	0	0	0	0	0.00446229	0.000722022	0.00256692	0	0	0	0.00244978	0.0035693	0.00113723	0.00212585	0	0	0	0	0	0	0	0	0	0	0.00519751	0.00246305
OTU_110	97	Root	Bacteria	Firmicutes	.	Erysipelotrichia	.	Erysipelotrichales	.	Erysipelotrichaceae	.	Turicibacter	.	1	Turicibacter_sanguinis_(T)_(AF349724)	99.6	1	0	0	0	0	0	0	0	0	0	0	0	0	0	0	0.0242038	0.0281899	0	0	0	0	0	0	0	0	0	0	0	0	0	0	0.00467775	0.00344828
OTU_112	95	Root	Bacteria	Bacteroidetes	.	Bacteroidia	.	Bacteroidales	.	Rikenellaceae	.	Alistipes	.	0.98	Alistipes_obesi_strain_ph8_(NR_133025.1)	100	1	0.00341131	0.0059727	0.0023015	0.000665557	0	0.00207211	0	0	0.00292398	0.00228571	0.0015618	0.00288809	0	0	0	0	0.00587947	0.00178465	0.00189538	0.00297619	0	0	0	0	0	0	0	0	0	0	0	0
OTU_265	92	Root	Bacteria	Firmicutes	.	Clostridia	.	Clostridiales	.	Lachnospiraceae	.	Clostridium XlVa	.	0.75	Clostridium_methoxybenzovorans_(T)_SR3;_DSM_12182_(AF067965)	96.8	2	0	0.000426621	0.00115075	0	0	0.00207211	0.00499643	0.00778614	0.00194932	0.00114286	0	0	0.00110011	0	0	0	0.00587947	0	0.00075815	0	0	0	0	0	0	0	0	0	0	0	0.002079	0
OTU_118	91	Root	Bacteria	Firmicutes	.	Clostridia	.	Clostridiales	.	.	.	.	.	0.9	Anaerobacterium_chartisolvens_T-1-35_(AB793710)	87.4	1	0	0	0	0	0	0	0	0	0.00243665	0	0.00133869	0.00120337	0	0	0.011465	0.0281899	0	0	0	0	0	0	0	0	0	0	0	0	0	0	0	0
OTU_134	90	Root	Bacteria	Firmicutes	.	Clostridia	.	Clostridiales	.	Lachnospiraceae	.	Clostridium XlVa	.	0.63	Clostridium_saccharolyticum_(T)_DSM_2544_(Y18185)	97.2	1	0	0	0	0	0	0	0	0	0	0	0	0	0	0	0	0	0	0	0	0	0	0	0.0115861	0.0196335	0	0	0	0	0.00843882	0.00528634	0	0
OTU_259	89	Root	Bacteria	Firmicutes	.	Clostridia	.	Clostridiales	.	Lachnospiraceae	.	Clostridium XlVa	.	0.5	Clostridium_bolteae_(T)_type_strain:_16351_(AJ508452)	96.8	1	0	0	0	0	0	0	0.0028551	0.00285492	0	0	0	0	0	0	0	0	0	0	0	0	0.00605845	0.00427019	0	0	0.00354839	0.00568788	0	0.000639488	0	0	0	0
OTU_157	88	Root	Bacteria	Firmicutes	.	Clostridia	.	Clostridiales	.	Ruminococcaceae	.	Clostridium IV	.	0.54	Clostridium_thermocellum_(T)_ATCC_27405_(CP000568)	92.1	9	0	0	0	0	0	0	0	0	0	0	0	0	0	0	0	0	0	0	0	0	0	0	0.0171794	0.0117801	0	0	0	0	0.0092827	0.00352423	0	0
OTU_113	88	Root	Bacteria	Bacteroidetes	.	Bacteroidia	.	Bacteroidales	.	Porphyromonadaceae	.	.	.	0.74	Muribaculum_intestinale_strain_YL27_(NR_144616.1)	87.3	1	0	0	0	0	0	0	0	0	0	0	0	0	0	0	0	0	0	0	0	0	0	0	0	0	0	0	0	0	0	0	0	0
OTU_115	81	Root	Archaea	Euryarchaeota	.	Methanobacteria	.	Methanobacteriales	.	Methanobacteriaceae	.	Methanobrevibacter	.	1	Methanobrevibacter_smithii_strain_PS_(NR_074235.1)	100	2	0	0	0	0	0	0	0	0	0	0	0	0	0	0	0	0	0	0	0	0	0	0	0.00639233	0.0039267	0	0	0	0	0.0177215	0.030837	0	0
OTU_117	80	Root	Bacteria	Firmicutes	.	Clostridia	.	Clostridiales	.	Ruminococcaceae	.	.	.	0.66	Eubacterium_coprostanoligenes_(T)_HL_(HM037995)	93.7	1	0	0	0	0	0	0	0	0	0	0	0	0	0.00440044	0.00236873	0	0	0.00391965	0.00713861	0.0090978	0.00765306	0	0	0	0	0	0	0	0	0	0	0	0
OTU_122	77	Root	Bacteria	Bacteroidetes	.	Bacteroidia	.	Bacteroidales	.	Prevotellaceae	.	Alloprevotella	.	0.72	Alloprevotella_rava_(T)_81/4-12_(JQ039189)	92.9	1	0.00682261	0.00341297	0.00920598	0.00831947	0.00231481	0	0	0	0	0	0	0	0	0	0	0	0	0	0	0	0	0	0	0	0	0	0	0	0	0	0	0
OTU_158	76	Root	Bacteria	Firmicutes	.	Clostridia	.	Clostridiales	.	Ruminococcaceae	.	Pseudoflavonifractor	.	0.53	Pseudoflavonifractor_phocaeensis_strain_Marseille-P3064_(NR_147370.1)	97.2	1	0	0.00298635	0	0	0.000771605	0.00124327	0.00142755	0.000778614	0	0	0.000223115	0	0	0	0	0	0	0	0	0	0	0	0.00878945	0.0100349	0	0	0	0	0	0.000881057	0	0
OTU_143	73	Root	Bacteria	Firmicutes	.	Clostridia	.	Clostridiales	.	Ruminococcaceae	.	Ruminococcus	.	1	Ruminococcus_callidus_(T)_ATCC_27760_(L76596)	100	1	0	0	0	0	0	0	0	0	0	0	0	0	0	0.00236873	0.00382166	0.00593472	0.0044096	0.00178465	0.00644428	0.00340136	0	0	0	0	0	0	0	0	0	0	0	0
OTU_121	73	Root	Bacteria	Proteobacteria	.	Alphaproteobacteria	.	Rhodospirillales	.	Rhodospirillaceae	.	.	.	0.68	*	0	1	0.00584795	0.00298635	0.00843882	0.00798669	0	0.00331538	0	0	0	0	0	0	0	0	0	0	0	0	0	0	0	0	0	0	0	0	0	0	0	0	0	0
OTU_119	73	Root	Bacteria	Firmicutes	.	.	.	.	.	.	.	.	.	0.83	Thermoactinomycetaceae_bacterium_R4S8_(KJ206288)	86.6	1	0	0	0	0	0	0	0	0	0	0	0	0	0	0	0	0	0	0	0	0	0	0	0.00519377	0.0056719	0	0	0	0	0.0202532	0.0202643	0	0
OTU_120	72	Root	Bacteria	Firmicutes	.	Clostridia	.	Clostridiales	.	Lachnospiraceae	.	Anaerostipes	.	1	Anaerostipes_caccae_(T)_L1-92_(AJ270487)	100	1	0	0	0	0	0	0	0	0	0	0	0	0	0	0	0	0	0	0	0	0	0	0	0	0	0	0	0.00645069	0.00431655	0	0	0	0
OTU_136	71	Root	Bacteria	Firmicutes	.	Clostridia	.	Clostridiales	.	Ruminococcaceae	.	Clostridium IV	.	0.62	Clostridium_methylpentosum_(T)_DSM_5476_(Y18181)	89.7	3	0	0	0	0	0	0	0	0	0	0	0	0	0	0	0	0	0	0	0	0	0	0	0	0	0	0	0	0	0	0	0.0181913	0.017734
OTU_128	71	Root	Bacteria	Firmicutes	.	Negativicutes	.	Selenomonadales	.	Acidaminococcaceae	.	Phascolarctobacterium	.	0.61	Phascolarctobacterium_faecium_(T)_(X72865)	96	1	0.00487329	0.00383959	0.00920598	0.00765391	0	0.00207211	0	0	0	0	0	0	0	0	0	0	0	0	0	0	0	0	0	0	0	0	0	0	0	0	0	0
OTU_126	70	Root	Bacteria	Proteobacteria	.	Gammaproteobacteria	.	Enterobacteriales	.	Enterobacteriaceae	.	Escherichia/Shigella	.	0.79	Shigella_sonnei_type_strain:_CECT_4887_(FR870445)	100	5	0	0	0	0	0	0	0	0	0	0	0	0	0	0	0	0	0	0	0	0	0	0	0.00918897	0.0082897	0	0	0	0	0.00759494	0.00969163	0	0
OTU_125	69	Root	Bacteria	Firmicutes	.	Clostridia	.	Clostridiales	.	Clostridiaceae 1	.	Clostridium sensu stricto	.	0.96	Clostridium_saudiense_strain_JCC_(NR_144696.1)	97.2	2	0	0	0	0	0	0	0.00356888	0.00441215	0	0.00228571	0	0	0	0	0	0	0	0	0	0	0	0	0	0	0	0	0	0	0	0	0	0
OTU_129	69	Root	Bacteria	Firmicutes	.	Clostridia	.	Clostridiales	.	Ruminococcaceae	.	Ruminococcus	.	0.99	Ruminococcus_champanellensis_18P13_type_strain:_18P13_(AJ515913)	94.1	1	0.00243665	0.00383959	0.0111239	0.00798669	0.000771605	0	0	0	0	0	0	0	0	0	0	0	0	0	0	0	0	0	0	0	0	0	0	0	0	0	0	0
OTU_187	68	Root	Bacteria	Firmicutes	.	Clostridia	.	Clostridiales	.	Lachnospiraceae	.	.	.	0.96	Clostridium_sp._UB-B.2_(HE603919)	95.7	2	0.000974659	0.00255973	0	0.00166389	0.00385802	0.00455864	0.000951701	0.00103815	0.00341131	0	0.000892459	0	0.00220022	0.000789578	0	0	0.000979912	0.00118977	0	0	0	0	0	0	0	0	0	0	0	0	0	0
OTU_127	67	Root	Bacteria	Firmicutes	.	Clostridia	.	Clostridiales	.	Lachnospiraceae	.	Clostridium XlVa	.	0.84	Clostridium_nexile_(T)_DSM_1787_(X73443)	98.8	1	0	0	0	0	0	0	0	0	0	0	0	0	0	0	0	0	0	0	0	0	0.00498931	0.00504658	0	0	0.00677419	0.00319943	0	0	0	0	0	0
OTU_139	65	Root	Bacteria	Firmicutes	.	Clostridia	.	Clostridiales	.	.	.	.	.	0.73	Alkalibacter_saccharofermentans_(T)_Z-79820_(AY312403)	87	1	0	0	0	0	0	0	0	0	0	0	0	0	0	0	0	0	0	0	0	0	0	0	0.00719137	0.0052356	0	0	0	0	0.0126582	0.0176211	0	0
OTU_132	64	Root	Bacteria	Firmicutes	.	Clostridia	.	Clostridiales	.	Ruminococcaceae	.	Oscillibacter	.	0.99	Oscillibacter_sp._GH1_(JF750939)	92.9	1	0	0	0	0	0	0	0	0	0	0	0.00267738	0.00312876	0.000733407	0.00276352	0.00127389	0	0	0	0	0.00085034	0	0	0	0	0	0	0	0	0	0	0	0
OTU_131	62	Root	Bacteria	Firmicutes	.	Clostridia	.	Clostridiales	.	.	.	.	.	0.79	Eubacterium_uniforme_(T)_X3C39_(GU269550)	86.2	1	0	0	0	0	0	0	0	0	0	0	0	0	0	0	0	0	0	0	0	0	0	0	0.00918897	0.0074171	0	0	0	0	0.0109705	0.00792952	0	0
OTU_130	61	Root	Bacteria	Bacteroidetes	.	Bacteroidia	.	Bacteroidales	.	Porphyromonadaceae	.	Barnesiella	.	0.67	Muribaculum_intestinale_strain_YL27_(NR_144616.1)	88.1	1	0	0	0	0	0	0	0	0	0	0	0	0	0	0	0	0	0	0	0	0	0	0	0.00719137	0.0056719	0	0	0	0	0.0109705	0.014978	0	0
OTU_135	58	Root	Bacteria	Firmicutes	.	Clostridia	.	Clostridiales	.	Lachnospiraceae	.	.	.	1	Clostridium_aerotolerans_(T)_DSM_5434_(X76163)	95.7	6	0	0	0	0	0	0	0	0	0	0	0	0	0	0	0	0	0	0	0	0	0	0	0.00918897	0.0095986	0	0	0	0	0	0.0114537	0	0
OTU_155	58	Root	Bacteria	Firmicutes	.	Clostridia	.	Clostridiales	.	Lachnospiraceae	.	Dorea	.	0.96	Dorea_formicigenerans_strain_ATCC_27755_(L34619)	100	1	0	0	0.00115075	0	0	0	0.00118963	0.00181677	0.000974659	0	0	0	0.000733407	0	0	0	0.00146987	0.00951814	0.00113723	0.00212585	0	0	0	0	0	0	0	0	0	0	0.0010395	0
OTU_133	58	Root	Bacteria	Bacteroidetes	.	Bacteroidia	.	Bacteroidales	.	.	.	.	.	0.5	*	0	1	0	0	0	0	0	0	0	0	0	0	0	0	0	0	0	0	0	0	0	0	0	0	0	0	0	0	0	0	0	0	0.0176715	0.0118227
OTU_137	56	Root	Bacteria	Proteobacteria	.	Deltaproteobacteria	.	.	.	.	.	.	.	0.51	*	0	1	0	0	0	0	0	0	0	0	0	0	0	0	0	0	0	0	0	0	0	0	0	0	0.00759089	0.0061082	0	0	0	0	0.0118143	0.00792952	0	0
OTU_146	56	Root	Bacteria	Firmicutes	.	Clostridia	.	.	.	.	.	.	.	0.53	Thermoactinomycetaceae_bacterium_R4S8_(KJ206288)	87.7	2	0.00194932	0.00170648	0.00268508	0.00299501	0.00231481	0.00248653	0	0	0	0	0.00111557	0	0.00110011	0	0	0	0	0.00178465	0	0.00255102	0	0	0.000799041	0	0	0	0	0	0	0.000881057	0	0
OTU_138	55	Root	Bacteria	Firmicutes	.	Clostridia	.	Clostridiales	.	Lachnospiraceae	.	Coprococcus	.	1	Coprococcus_eutactus_(T)_ATCC_27759_(EF031543)	96.8	1	0	0	0	0	0	0	0	0	0	0	0	0	0	0	0.0178344	0.0103858	0	0	0	0	0	0	0	0	0	0	0	0	0	0	0	0
OTU_144	55	Root	Bacteria	Firmicutes	.	Clostridia	.	Clostridiales	.	.	.	.	.	0.98	Clostridium_putrificum_(T)_DSM_1734_(X73442)	91.3	1	0	0	0	0	0	0	0	0	0	0	0	0	0.00843418	0.00631662	0	0	0	0	0	0	0	0	0.00359569	0.0030541	0	0	0	0	0	0	0	0
OTU_141	52	Root	Bacteria	Bacteroidetes	.	Bacteroidia	.	Bacteroidales	.	Porphyromonadaceae	.	Macellibacteroides	.	0.5	Muribaculum_intestinale_strain_YL27_(NR_144616.1)	92.1	1	0	0	0	0	0	0	0	0	0	0	0	0	0	0	0	0	0	0	0	0	0	0	0.00998801	0.008726	0	0	0	0	0.00590717	0	0	0
OTU_156	52	Root	Bacteria	Firmicutes	.	Clostridia	.	Clostridiales	.	Ruminococcaceae	.	.	.	0.97	Flintibacter_butyricus_strain_BLS21_(NR_144611.1)	93.3	1	0	0	0	0.00133111	0	0	0	0	0	0	0	0	0	0	0	0	0	0	0	0	0	0	0.00239712	0.0065445	0	0	0	0	0.00421941	0.00528634	0.00155925	0.00492611
OTU_194	51	Root	Bacteria	Firmicutes	.	Clostridia	.	Clostridiales	.	Ruminococcaceae	.	.	.	0.81	Sporobacter_termitidis_(T)_SYR_(Z49863)	92.5	1	0.00584795	0.00213311	0	0	0	0	0	0	0	0	0.000446229	0	0	0	0	0	0.00244978	0.00475907	0.00341168	0.0042517	0	0	0	0	0	0	0	0	0	0	0	0
OTU_142	51	Root	Bacteria	Firmicutes	.	Erysipelotrichia	.	Erysipelotrichales	.	Erysipelotrichaceae	.	Erysipelotrichaceae_incertae_sedis	.	0.58	[Clostridium]_innocuum_strain_B-3_(NR_029164.1)	100	1	0	0	0	0	0	0	0	0	0	0	0	0	0	0	0	0	0	0	0	0	0	0	0	0	0	0	0.00401376	0.00367706	0	0	0	0
OTU_163	51	Root	Bacteria	Firmicutes	.	Clostridia	.	Clostridiales	.	Lachnospiraceae	.	.	.	1	Syntrophococcus_sucromutans_(T)_S195_(AF202264)	95.3	2	0.00341131	0.00170648	0	0.00133111	0.00385802	0.00414422	0	0	0	0	0.000669344	0	0.00220022	0.000789578	0	0	0.000489956	0	0	0	0	0	0	0	0	0	0	0	0	0	0	0
OTU_147	50	Root	Bacteria	Firmicutes	.	Clostridia	.	Clostridiales	.	Ruminococcaceae	.	Anaerofilum	.	0.71	Anaerofilum_pentosovorans_(T)_Fae;_DSM_7168_(X97852)	94.4	2	0	0	0	0	0	0	0	0	0	0	0	0	0	0	0	0	0	0	0	0	0	0	0	0	0	0	0.00329702	0.00431655	0	0	0	0
OTU_151	49	Root	Bacteria	Proteobacteria	.	Deltaproteobacteria	.	Bdellovibrionales	.	Bdellovibrionaceae	.	Vampirovibrio	.	0.58	*	0	1	0.00146199	0.00213311	0.00575374	0.00532446	0.00154321	0.00248653	0	0	0	0	0	0	0	0	0	0	0	0	0	0	0	0	0	0	0	0	0	0	0	0	0	0
OTU_184	48	Root	Bacteria	Firmicutes	.	Clostridia	.	Clostridiales	.	Lachnospiraceae	.	Dorea	.	0.61	Mordavella_massiliensis_strain_Marseille-P3246_(NR_147406.1)	95.3	1	0	0	0	0	0	0	0.00237925	0.00259538	0	0	0	0	0	0	0.00382166	0.00148368	0	0	0	0	0	0	0	0	0	0	0	0	0	0	0	0
OTU_148	48	Root	Bacteria	Firmicutes	.	Clostridia	.	Clostridiales	.	Lachnospiraceae	.	Lachnospiracea_incertae_sedis	.	0.75	Ruminococcus_gnavus_(T)_ATCC_29149_(X94967)	100	1	0	0	0	0	0	0	0.00166548	0.000519076	0	0	0	0	0	0	0	0	0	0	0	0	0	0.0015528	0	0	0.000967742	0.000710985	0.000716743	0.000479616	0	0	0	0
OTU_145	48	Root	Bacteria	Bacteroidetes	.	Bacteroidia	.	Bacteroidales	.	Porphyromonadaceae	.	.	.	0.92	Muribaculum_intestinale_strain_YL27_(NR_144616.1)	91.7	1	0	0	0	0	0	0	0	0	0	0	0	0	0	0	0	0	0	0	0	0	0	0	0.00719137	0.0047993	0	0	0	0	0	0.0167401	0	0
OTU_149	45	Root	Bacteria	Firmicutes	.	Bacilli	.	Lactobacillales	.	Lactobacillaceae	.	Lactobacillus	.	0.98	Lactobacillus_mucosae_(T)_CCUG_43179_(T);_S32;_DSM_13345_(AF126738)	100	1	0	0	0	0	0	0	0	0	0	0	0	0	0	0	0	0	0	0	0	0	0	0	0	0	0	0	0	0	0	0	0.0114345	0.01133
OTU_150	45	Root	Bacteria	Firmicutes	.	Clostridia	.	Clostridiales	.	Lachnospiraceae	.	Anaerostipes	.	0.99	Anaerostipes_butyraticus_(T)_35-7_(FJ947528)	97.2	1	0	0	0	0	0	0	0	0	0	0	0	0	0	0	0	0	0	0	0	0	0	0	0	0	0	0	0	0	0	0	0.014553	0.00689655
OTU_164	43	Root	Bacteria	Firmicutes	.	Clostridia	.	Clostridiales	.	Lachnospiraceae	.	.	.	1	Clostridium_sp._UB-B.2_(HE603919)	95.7	1	0	0	0	0	0	0	0	0	0	0	0	0	0	0	0	0	0	0	0	0	0	0	0.00679185	0.0047993	0	0	0	0	0.00506329	0.00792952	0	0
OTU_152	43	Root	Bacteria	Proteobacteria	.	Gammaproteobacteria	.	Pasteurellales	.	Pasteurellaceae	.	Haemophilus	.	0.69	Haemophilus_parainfluenzae_(T)_CCUG_12836_(AY362908)	100	1	0	0	0	0	0	0	0	0	0	0	0	0	0	0	0	0	0	0	0	0	0.00249465	0	0	0	0.00225806	0.00106648	0	0	0	0	0.00727651	0.00591133
[truncated: 102 more rows]
[truncated: 8 more columns]

## Sheet: Kelpie counts usX
															273			2052	2344	2607	3005	2592	2413	4203	3853	2052	1750	4482	4155	2727	2533	785	674	2041	1681	2638	2352	2806	2576	2503	2292	3100	2813	6976	6255	1185	1135	1924	2030
[truncated: 274 more rows]
[truncated: 9 more columns]

[truncated: 5 more sheets: Paper table, Classes, Orders, Families, EBI reads histo]
