# Supplementary material for: Kelpie: generating full-length ‘amplicons’ from whole-metagenome datasets
Source: PeerJ. 2019 Jan 30;6:e6174. doi: 10.7717/peerj.6174 (PMC6359901; doi:10.7717/peerj.6174)
Supplement: Table S6 — Source spreadsheet for the CSM-derived tables and figures. [file peerj-07-6174-s006.xlsx]

## Sheet: AESS summary
Summary statistics from AESS OTU tables (Amplicons, Extended, Spades full, Spades 16S)
	W1 amplicon	W1 extended	W1 Spades	W1 Spades 16S	W2 amplicon	W2 extended	W2 Spades	W2 Spades 16S	W3 amplicon	W3 extended	W3 Spades	W3 Spades 16S		0.98		W1	W2	W3	Total		0.99		W1	W2	W3	Total
0.98	32	32	16	24	24	24	14	14	39	39	24	24			amplicon	32	24	39	95	1		amplicon	48	34	54	136	1
0.99	48	39	17	25	34	30	15	14	54	51	26	24			Kelpie	32	24	39	95	1		Kelpie	39	30	51	120	0.882353
															Spades	16	14	24	54	0.568421		Spades	17	15	26	58	0.426471
															Spades 16S	24	14	24	62	0.652632		Spades 16S	25	14	24	63	0.463235
Adjusted for poor WGS support (<80% coverage), and well-supported WGS extensions.
	W1 amplicon	W1 extended	W1 Spades	W1 Spades 16S	W2 amplicon	W2 extended	W2 Spades	W2 Spades 16S	W3 amplicon	W3 extended	W3 Spades	W3 Spades 16S		0.98		W1	W2	W3	Total		0.99		W1	W2	W3	Total
0.98	32	32	16	24	24	24	14	14	39	39	24	24			amplicon	32	24	39	95	1		amplicon	43	30	52	125	1
0.99	43	40	17	25	30	30	15	14	52	52	26	24			Kelpie	32	24	39	95	1		Kelpie	40	30	52	122	0.976
															Spades	16	14	24	54	0.568421		Spades	17	15	26	58	0.464
															Spades 16S	24	14	24	62	0.652632		Spades 16S	25	14	24	63	0.504
Adjustments	W1 amplicon	W1 extended	W1 Spades	W1 Spades 16S	W2 amplicon	W2 extended	W2 Spades	W2 Spades 16S	W3 amplicon	W3 extended	W3 Spades	W3 Spades 16S
A errors
0.98	0				0
0.99	5				4				2
not in A
0.98		0
0.99		1								1
																`

## Sheet: AESS-all
Combined OTU table from single run of all 12 sources.																		42897	19600	7684	16895	46024	15848	3483	3502	34876	23056	10875	11432
	236172																																	Coverage	Coverage	Coverage
OTU	Size	RDP classification												Conf.	Species	Match%	Match#	W1 amplicon	W1 16S extended	W1 Spades contigs	W1 Spades 16S contigs	W2 amplicon	W2 16S extended	W2 Spades contigs	W2 Spades 16S contigs	W3 amplicon	W3 16S extended	W3 Spades contigs	W3 Spades 16S contigs		Overall %	Cumulative		WGS 16S W1	WGS 16S W2	WGS 16S W3
OTU_1	58184	Root	Bacteria	Proteobacteria	.	Deltaproteobacteria	.	Desulfuromonadales	.	Desulfuromonadaceae	.	Desulfuromonas	.	0.91	Desulfuromonas_acetexigens_(T)_(U23140)	96.8	1	27333	13574	5292	8544	132	0	0	0	1554	1010	195	550		0.246363	0.246363		100	77	100
OTU_2	24970	Root	Bacteria	.	.	.	.	.	.	.	.	.	.	0.99	Thermodesulfovibrio_aggregans_(T)_TGE-P1_(AB021302)	87	1	24	0	0	0	17120	7816	0	0	10	0	0	0		0.105728	0.352091		84	100	25
OTU_3	14236	Root	Bacteria	Spirochaetes	.	Spirochaetia	.	Spirochaetales	.	Spirochaetaceae	.	.	.	0.57	Treponema_zuelzerae_(T)_type_strain:_DSM_1903;_2_(FR749929)	85.8	1	13	0	0	0	1171	305	122	229	5956	3069	1889	1482		0.0602781	0.412369		0	100	100
OTU_4	12568	Root	Archaea	Euryarchaeota	.	Methanobacteria	.	Methanobacteriales	.	Methanobacteriaceae	.	Methanobacterium	.	1	Methanobacterium_subterraneum_(T)_A8p,_DSM_11074_(X99044)	100	1	5	0	0	0	29	0	0	0	7736	2393	1396	1009		0.0532155	0.465584		0	32	100
OTU_6	8872	Root	Bacteria	Bacteroidetes	.	Bacteroidia	.	Bacteroidales	.	Porphyromonadaceae	.	.	.	0.67	Parabacteroides_distasonis_(T)_JCM_5825_(AB238922)	85.8	1	1270	271	193	140	9	0	0	0	3116	1598	1207	1068		0.0375658	0.50315		100	0	100
OTU_7	8470	Root	Archaea	Euryarchaeota	.	Methanomicrobia	.	Methanosarcinales	.	Methanotrichaceae	.	Methanothrix	.	1	Methanosaeta_harundinacea_(T)_8Ac_(AY817738)	97.2	1	1032	192	0	0	16	0	0	0	3332	1942	1044	912		0.0358637	0.539014		100	60	100
OTU_8	8389	Root	Bacteria	Bacteroidetes	.	.	.	.	.	.	.	.	.	0.99	Cytophaga_fermentans_(T)_ATCC_19072_(M58766)	87.7	1	9	0	0	0	5845	1220	766	542	7	0	0	0		0.0355207	0.574535		2	100	25
OTU_5	8105	Root	Archaea	Euryarchaeota	.	Methanomicrobia	.	Methanosarcinales	.	Methanosarcinaceae	.	Methanosarcina	.	1	Methanosarcina_siciliae_type_strain:_DSM3028_(FR733698)	100	7	1238	2733	1738	2109	11	0	0	0	54	222	0	0		0.0343182	0.608853		100	39	100
OTU_11	5998	Root	Bacteria	Firmicutes	.	Negativicutes	.	Selenomonadales	.	Veillonellaceae	.	.	.	0.53	Lysinibacillus_sp._LAM612_(KF443809)	88.5	2	3	0	0	0	7	0	0	0	533	4068	0	1387		0.0253967	0.63425		7	31	100
OTU_10	5619	Root	Bacteria	.	.	.	.	.	.	.	.	.	.	1	candidate_division_OP1_clone_OPB14_(AF027045)	89.7	1	3	0	0	0	4057	771	424	358	6	0	0	0		0.023792	0.658042		6	100	57
OTU_9	5520	Root	Bacteria	Firmicutes	.	Clostridia	.	.	.	.	.	.	.	0.58	Thermacetogenium_phaeum_(T)_PB_(AB020336)	87	1	5	0	0	0	14	0	0	0	3285	2216	0	0		0.0233728	0.681414		13	14	100
OTU_12	4395	Root	Bacteria	Proteobacteria	.	Epsilonproteobacteria	.	Campylobacterales	.	Campylobacteraceae	.	Sulfurospirillum	.	0.62	Sulfurospirillum_alkalitolerans_HTRB-L1_(GQ863490)	97.2	1	2340	508	0	1475	41	0	0	0	31	0	0	0		0.0186093	0.700024		100	2	0
OTU_13	4223	Root	Bacteria	Firmicutes	.	Clostridia	.	Thermoanaerobacterales	.	Thermoanaerobacteraceae	.	.	.	0.64	Syntrophaceticus_schinkii_(T)_Sp3_(EU386162)	90.5	1	6	0	0	0	2871	506	400	433	7	0	0	0		0.017881	0.717905		33	100	7
OTU_14	4165	Root	Archaea	Euryarchaeota	.	Methanomicrobia	.	Methanomicrobiales	.	Methanomicrobiales_incertae_sedis	.	Methanocalculus	.	1	Methanocalculus_pumilus_(T)_MHT-1_(AB008853)	99.6	1	3312	476	0	318	30	0	0	0	29	0	0	0		0.0176355	0.73554		100	25	18
OTU_16	3899	Root	Archaea	Euryarchaeota	.	Methanobacteria	.	Methanobacteriales	.	Methanobacteriaceae	.	Methanobacterium	.	1	Methanobacterium_aarhusense_(T)_H2-LR_(AY386124)	99.6	1	1	0	0	0	3104	271	253	263	7	0	0	0		0.0165092	0.752049		5	100	46
OTU_15	3652	Root	Bacteria	Firmicutes	.	Clostridia	.	Clostridiales	.	.	.	.	.	0.89	Desulfotomaculum_acetoxidans_(T)_DSM_771_(Y11566)	90.9	1	6	0	0	0	2463	1177	0	0	6	0	0	0		0.0154633	0.767513		17	100	43
OTU_19	3012	Root	Archaea	Euryarchaeota	.	Methanobacteria	.	Methanobacteriales	.	Methanobacteriaceae	.	Methanothermobacter	.	1	Methanothermobacter_thermoflexus_(T)_IDZ,_VKM_B-1963,_DSM_7268_(X99047)	100	7	1	0	0	0	2685	326	0	0	0	0	0	0		0.0127534	0.780266		5	100	10
OTU_24	2540	Root	Bacteria	Firmicutes	.	Clostridia	.	Clostridiales	.	Clostridiaceae 2	.	Natronincola	.	0.87	Natronincola_peptidivorans_(T)_Z-7031_(EF382661)	99.2	1	12	0	0	0	8	0	0	0	1293	754	0	473		0.0107549	0.791021		64	8	100
OTU_18	2287	Root	Bacteria	.	.	.	.	.	.	.	.	.	.	0.95	*	0	1	2	0	0	0	955	556	482	292	0	0	0	0		0.00968362	0.800705		0	100	0
OTU_17	2245	Root	Bacteria	Firmicutes	.	Clostridia	.	Clostridiales	.	.	.	.	.	0.81	Caldicoprobacter_guelmensis_(T)_D2C22_(JQ707908)	91.3	2	17	0	0	0	7	0	0	0	477	343	946	455		0.00950578	0.81021		97	46	100
OTU_29	2114	Root	Archaea	Euryarchaeota	.	Methanobacteria	.	Methanobacteriales	.	Methanobacteriaceae	.	Methanobacterium	.	0.9	Methanobacterium_alcaliphilum_(T)_NBRC_105226_(AB496639)	100	2	2	0	0	0	1161	100	0	0	586	265	0	0		0.0089511	0.819161		40	100	100
OTU_20	2099	Root	Bacteria	Firmicutes	.	Clostridia	.	Clostridiales	.	.	.	.	.	0.85	Clostridium_hungatei_(T)_AD;_ATCC_700212_(AF020429)	91.3	1	5	0	0	0	5	0	0	0	1124	965	0	0		0.00888759	0.828049		9	9	100
OTU_23	2005	Root	Bacteria	Ignavibacteriae	.	Ignavibacteria	.	Ignavibacteriales	.	Ignavibacteriaceae	.	Ignavibacterium	.	1	Ignavibacterium_album_(T)_Mat9-16_(AB478415)	99.6	1	1	0	0	0	1089	408	236	262	9	0	0	0		0.00848958	0.836539		0	100	0
OTU_27	1974	Root	Bacteria	Bacteroidetes	.	Bacteroidia	.	Bacteroidales	.	.	.	.	.	0.61	Porphyromonas_pogonae_strain_MI_10-1288_(NR_136443.1)	86.2	2	1059	128	45	61	29	0	0	0	389	129	71	63		0.00835832	0.844897		100	2	100
OTU_21	1955	Root	Bacteria	Bacteroidetes	.	Bacteroidia	.	Bacteroidales	.	Porphyromonadaceae	.	.	.	0.5	Pontibacter_sp._JC215_A10_(HG008901)	85.8	1	4	0	0	0	2	0	0	0	931	1018	0	0		0.00827787	0.853175		99	18	100
OTU_22	1941	Root	Bacteria	Proteobacteria	.	Deltaproteobacteria	.	Desulfovibrionales	.	Desulfovibrionaceae	.	Desulfovibrio	.	1	Desulfovibrio_oxamicus_(T)_DSM_1925_(DQ122124)	100	1	19	10	0	0	2	0	0	0	860	624	426	0		0.00821859	0.861393		75	19	100
OTU_26	1857	Root	Bacteria	Firmicutes	.	Negativicutes	.	Selenomonadales	.	Veillonellaceae	.	Sporomusa	.	0.96	Sporomusa_ovata_strain_DSM_2662_(NR_117659.1)	98	3	1	0	0	0	0	0	0	0	306	175	805	570		0.00786291	0.869256		9	21	100
OTU_28	1822	Root	Bacteria	Firmicutes	.	Clostridia	.	Clostridiales	.	Eubacteriaceae	.	Acetobacterium	.	1	Acetobacterium_malicum_(T)_DSM_4132_(X96957)	100	3	929	304	37	161	16	0	0	0	153	155	67	0		0.00771472	0.876971		100	1	100
OTU_25	1536	Root	Bacteria	Firmicutes	.	Clostridia	.	.	.	.	.	.	.	0.84	Moorella_humiferrea_(T)_64_FGQ_(GQ872425)	88.9	2	1	0	0	0	129	847	559	0	0	0	0	0		0.00650373	0.883475		15	100	40
OTU_31	1351	Root	Bacteria	Proteobacteria	.	Deltaproteobacteria	.	.	.	.	.	.	.	0.5	Thiohalocapsa_marina_(T)_type_strain:_JA142_(AM491592)	89.7	1	304	98	50	894	0	0	0	0	5	0	0	0		0.00572041	0.889195		100	0	61
OTU_41	1322	Root	Bacteria	Chloroflexi	.	Anaerolineae	.	Anaerolineales	.	Anaerolineaceae	.	Ornatilinea	.	0.94	Ornatilinea_apprima_P3M-1_(JQ292916)	89.7	1	796	254	154	113	3	0	0	0	2	0	0	0		0.00559762	0.894793		100	31	6
OTU_30	1295	Root	Bacteria	Firmicutes	.	Clostridia	.	.	.	.	.	.	.	0.84	Dethiobacter_alkaliphilus_(T)_AHT_1_(EF422412)	89.3	2	0	0	0	0	4	0	0	0	23	19	0	1249		0.00548329	0.900276		13	75	100
OTU_33	1244	Root	Bacteria	Proteobacteria	.	Deltaproteobacteria	.	Syntrophobacterales	.	Syntrophobacteraceae	.	Syntrophobacter	.	1	Syntrophobacter_sulfatireducens_(T)_TB8106_(AY651787)	100	1	219	65	0	190	17	0	0	0	254	139	186	174		0.00526735	0.905543		100	100	100
OTU_36	1224	Root	Bacteria	Nitrospirae	.	Nitrospira	.	Nitrospirales	.	Nitrospiraceae	.	Thermodesulfovibrio	.	1	Thermodesulfovibrio_aggregans_(T)_TGE-P1_(AB021302)	96.4	1	2	0	0	0	722	440	59	0	1	0	0	0		0.00518266	0.910726		0	100	0
OTU_32	1182	Root	Bacteria	Synergistetes	.	Synergistia	.	Synergistales	.	Synergistaceae	.	Aminiphilus	.	1	Aminiphilus_circumscriptus_(T)_ILE-2_(AY642589)	95.6	1	0	0	0	0	0	0	0	0	0	4	1178	0		0.00500483	0.915731		75	13	100
OTU_34	1063	Root	Bacteria	Firmicutes	.	Clostridia	.	Clostridiales	.	Ruminococcaceae	.	Clostridium III	.	0.95	Clostridium_sufflavum_(T)_CDT-1_(AB267266)	97.2	3	13	14	0	997	0	0	0	0	27	12	0	0		0.00450096	0.920232		100	15	96
OTU_35	1005	Root	Bacteria	Bacteroidetes	.	Bacteroidia	.	Bacteroidales	.	Bacteroidaceae	.	Anaerorhabdus	.	0.6	Dielma_fastidiosa_strain_JC13_(NR_125593.1)	92.5	1	0	0	0	0	0	0	0	0	32	178	466	329		0.00425537	0.924487		0	0	100
OTU_39	973	Root	Bacteria	Proteobacteria	.	Deltaproteobacteria	.	Desulfovibrionales	.	Desulfovibrionaceae	.	Desulfovibrio	.	1	Desulfovibrio_alkalitolerans_(T)_RT2_(AY649785)	99.2	1	108	23	8	129	4	0	0	0	429	23	135	114		0.00411988	0.928607		100	0	100
OTU_38	944	Root	Bacteria	Proteobacteria	.	Alphaproteobacteria	.	Rhodospirillales	.	Rhodospirillaceae	.	.	.	0.67	Magnetospira_thiophila_(T)_MMS-1_(EU861390)	90.1	1	6	0	0	8	5	0	0	0	290	285	202	148		0.00399709	0.932604		100	0	100
OTU_37	910	Root	Bacteria	Firmicutes	.	Clostridia	.	Clostridiales	.	Peptococcaceae 1	.	Desulfitibacter	.	0.61	Desulfitibacter_alkalitolerans_(T)_sk.kt5_(AY538171)	92.1	1	0	0	0	0	1	0	0	0	13	6	241	649		0.00385312	0.936457		34	33	100
OTU_40	866	Root	Bacteria	Firmicutes	.	Clostridia	.	Clostridiales	.	Peptococcaceae 2	.	Pelotomaculum	.	0.95	Pelotomaculum_propionicicum_(T)_MGP_(AB154390)	99.2	1	4	0	0	0	188	67	43	564	0	0	0	0		0.00366682	0.940124		7	100	8
OTU_49	774	Root	Bacteria	Firmicutes	.	Clostridia	.	Natranaerobiales	.	Natranaerobiaceae	.	Dethiobacter	.	0.95	Dethiobacter_alkaliphilus_(T)_AHT_1_(EF422412)	96	1	4	0	0	0	43	84	18	147	116	99	16	247		0.00327727	0.943401		9	54	100
OTU_42	749	Root	Bacteria	Bacteroidetes	.	Bacteroidia	.	Bacteroidales	.	Prolixibacteraceae	.	.	.	0.87	Sunxiuqinia_faeciviva_(T)_JAM-BA0302_(AB362263)	91.7	1	53	13	15	53	111	82	53	62	119	188	0	0		0.00317142	0.946573		100	100	100
OTU_44	604	Root	Bacteria	Synergistetes	.	Synergistia	.	Synergistales	.	Synergistaceae	.	Aminiphilus	.	1	Aminiphilus_circumscriptus_(T)_ILE-2_(AY642589)	99.6	1	205	82	53	259	2	0	0	0	3	0	0	0		0.00255746	0.94913		100	16	100
OTU_43	601	Root	Bacteria	Synergistetes	.	Synergistia	.	Synergistales	.	Synergistaceae	.	Aminivibrio	.	0.68	Aminivibrio_pyruvatiphilus_4F6E_(AB623229)	91.7	1	128	62	6	403	2	0	0	0	0	0	0	0		0.00254476	0.951675		100	1	0
OTU_45	563	Root	Bacteria	Proteobacteria	.	Deltaproteobacteria	.	Syntrophobacterales	.	Syntrophaceae	.	Smithella	.	0.97	Smithella_propionica_(T)_LYP_(AF126282)	98	1	7	0	0	0	217	65	0	0	82	25	77	90		0.00238386	0.954059		44	100	100
OTU_50	472	Root	Bacteria	.	.	.	.	.	.	.	.	.	.	0.92	*	0	1	0	0	0	0	259	211	0	0	2	0	0	0		0.00199854	0.956057		0	100	0
OTU_172	461	Root	Bacteria	Bacteroidetes	.	Bacteroidia	.	Bacteroidales	.	.	.	.	.	0.58	Pontibacter_niistensis_(T)_NII-0905_(FJ897494)	85.4	2	1	0	0	0	269	100	26	65	0	0	0	0		0.00195197	0.958009		21	86	21
OTU_46	447	Root	Bacteria	Proteobacteria	.	Gammaproteobacteria	.	Pseudomonadales	.	Pseudomonadaceae	.	Pseudomonas	.	0.99	Pseudomonas_songnenensis_strain_NEAU-ST5-5_(NR_148295.1)	100	2	6	0	0	0	1	0	0	0	138	126	102	74		0.00189269	0.959902		56	0	100
OTU_65	441	Root	Bacteria	Proteobacteria	.	Deltaproteobacteria	.	Syntrophobacterales	.	Syntrophaceae	.	Smithella	.	0.77	Smithella_propionica_(T)_LYP_(AF126282)	97.6	1	84	33	0	269	3	0	0	0	27	25	0	0		0.00186728	0.961769		100	46	79
OTU_48	425	Root	Bacteria	Firmicutes	.	Clostridia	.	Clostridiales	.	Syntrophomonadaceae	.	Syntrophomonas	.	1	Syntrophomonas_bryantii_type_strain:_DSM_3014_(HE654006)	96.8	1	53	21	0	12	4	0	0	0	61	69	0	205		0.00179954	0.963569		100	0	100
OTU_47	409	Root	Archaea	Euryarchaeota	.	Methanomicrobia	.	Methanomicrobiales	.	Methanospirillaceae	.	Methanospirillum	.	1	Methanospirillum_hungatei_strain_JF-1_(NR_074177.1)	98.4	2	67	135	0	206	0	0	0	0	1	0	0	0		0.00173179	0.965301		100	0	0
OTU_51	397	Root	Bacteria	Firmicutes	.	Clostridia	.	Clostridiales	.	Clostridiales_Incertae Sedis XI	.	.	.	0.77	Dethiosulfatibacter_aminovorans_(T)_C/G2_(=_JCM_13356,_=_NBRC_101112,_=_DSM_17477)_(AB218661)	94.8	1	230	115	0	49	0	0	0	0	3	0	0	0		0.00168098	0.966982		100	9	14
OTU_52	316	Root	Bacteria	.	.	.	.	.	.	.	.	.	.	1	uncultured_bacterium_KF-JG30-18_(AJ295656)	90.1	1	0	0	0	0	44	28	23	221	0	0	0	0		0.00133801	0.96832		2	100	1
OTU_67	315	Root	Bacteria	Chloroflexi	.	Anaerolineae	.	Anaerolineales	.	Anaerolineaceae	.	Bellilinea	.	1	Bellilinea_caldifistulae_(T)_GOMI-1_(AB243672)	98.8	1	2	0	0	0	93	48	0	20	51	50	23	28		0.00133377	0.969653		15	100	64
OTU_53	276	Root	Bacteria	Firmicutes	.	Clostridia	.	Clostridiales	.	Clostridiaceae 1	.	Clostridium sensu stricto	.	1	Clostridium_luticellarii_strain_FW431_(NR_145907.1)	98.4	1	0	0	0	0	0	0	0	0	53	63	60	100		0.00116864	0.970822		3	0	100
OTU_54	275	Root	Bacteria	Firmicutes	.	Clostridia	.	Clostridiales	.	Ruminococcaceae	.	Ercella	.	0.84	Ruminococcaceae_bacterium_ZWB_4_(HG003571)	96	1	169	47	31	25	2	0	0	0	1	0	0	0		0.00116441	0.971987		100	0	45
OTU_55	265	Root	Bacteria	Firmicutes	.	Clostridia	.	Clostridiales	.	Peptococcaceae 1	.	Desulfitobacterium	.	0.9	Desulfitobacterium_metallireducens_(T)_853-15A_(AF297871)	97.6	1	0	0	0	0	1	0	0	0	146	118	0	0		0.00112206	0.973109		14	21	100
OTU_57	257	Root	Bacteria	Firmicutes	.	Clostridia	.	Clostridiales	.	Peptococcaceae 1	.	Desulfitibacter	.	1	Desulfitibacter_alkalitolerans_(T)_sk.kt5_(AY538171)	98.8	1	0	0	0	0	2	0	0	0	181	74	0	0		0.00108819	0.974197		16	12	100
OTU_58	242	Root	Bacteria	Bacteroidetes	.	.	.	.	.	.	.	.	.	1	Marivirga_sericea_(T)_IFO_15983_(AB078081)	87	3	125	58	9	41	8	0	0	0	1	0	0	0		0.00102468	0.975221		100	2	2
OTU_59	232	Root	Bacteria	.	.	.	.	.	.	.	.	.	.	0.94	*	0	1	161	70	0	0	1	0	0	0	0	0	0	0		0.000982335	0.976204		100	0	25
OTU_56	230	Root	Bacteria	Proteobacteria	.	Deltaproteobacteria	.	Desulfovibrionales	.	Desulfomicrobiaceae	.	Desulfomicrobium	.	1	Desulfomicrobium_salsuginis_strain_ADR21_(NR_132593.1)	98.8	2	25	8	0	193	0	0	0	0	4	0	0	0		0.000973867	0.977178		100	0	1
OTU_63	212	Root	Bacteria	Bacteroidetes	.	Bacteroidia	.	Bacteroidales	.	Porphyromonadaceae	.	Acetobacteroides	.	0.54	Olivibacter_sitiensis_(T)_AW-6_(DQ421387)	86.2	1	175	33	0	0	0	0	0	0	4	0	0	0		0.000897651	0.978075		100	0	8
OTU_60	201	Root	Bacteria	Bacteroidetes	.	Bacteroidia	.	Bacteroidales	.	Porphyromonadaceae	.	Petrimonas	.	1	Petrimonas_sulfuriphila_(T)_BN3_(AY570690)	100	1	104	16	16	65	0	0	0	0	0	0	0	0		0.000851075	0.978926		100	0	0
OTU_61	193	Root	Bacteria	Chloroflexi	.	Anaerolineae	.	Anaerolineales	.	Anaerolineaceae	.	.	.	0.69	Thermanaerothrix_daxensis_strain_GNS-1_(NR_117865.1)	87.4	2	0	0	0	0	70	79	0	44	0	0	0	0		0.000817201	0.979744		0	100	0
OTU_195	192	Root	Bacteria	Firmicutes	.	Clostridia	.	Clostridiales	.	.	.	.	.	0.7	Caldicoprobacter_algeriensis_TH7C1_(GU216701)	92.1	2	0	0	0	0	132	60	0	0	0	0	0	0		0.000812967	0.980557		34	91	34
OTU_64	184	Root	Bacteria	Nitrospirae	.	Nitrospira	.	Nitrospirales	.	Nitrospiraceae	.	Thermodesulfovibrio	.	1	Thermodesulfovibrio_yellowstonii_(T)_YP87_(AB231858)	100	1	0	0	0	0	107	77	0	0	0	0	0	0		0.000779093	0.981336		0	100	0
OTU_62	178	Root	Bacteria	Spirochaetes	.	Spirochaetia	.	Spirochaetales	.	Spirochaetaceae	.	Spirochaeta	.	0.51	Spirochaeta_smaragdinae_(T)_SEBR_4228;_DSM_11293_(U80597)	88.1	1	4	0	0	0	0	0	0	0	61	53	29	31		0.000753688	0.982089		48	0	100
OTU_74	175	Root	Bacteria	Proteobacteria	.	Deltaproteobacteria	.	.	.	Syntrophorhabdaceae	.	Syntrophorhabdus	.	1	Syntrophorhabdus_aromaticivorans_(T)_UI_(AB212873)	97.2	1	25	3	0	0	47	19	0	0	25	56	0	0		0.000740985	0.98283		100	69	100
OTU_69	157	Root	Bacteria	Firmicutes	.	.	.	.	.	.	.	.	.	0.96	Clostridium_thermocellum_(T)_ATCC_27405_(CP000568)	92.5	5	0	0	0	0	2	0	0	0	106	49	0	0		0.00066477	0.983495		11	13	100
OTU_70	148	Root	Bacteria	Chloroflexi	.	Anaerolineae	.	Anaerolineales	.	Anaerolineaceae	.	Ornatilinea	.	1	Ornatilinea_apprima_P3M-1_(JQ292916)	99.6	1	109	34	0	0	2	0	0	0	3	0	0	0		0.000626662	0.984122		100	17	22
OTU_68	134	Root	Bacteria	Firmicutes	.	Clostridia	.	Clostridiales	.	Clostridiales_Incertae Sedis III	.	Tepidanaerobacter	.	0.99	Tepidanaerobacter_syntrophicus_(T)_JL_(AB106353)	95.7	1	0	0	0	0	0	0	0	0	32	40	62	0		0.000567383	0.984689		69	0	100
OTU_66	129	Root	Bacteria	Firmicutes	.	Clostridia	.	Clostridiales	.	.	.	.	.	0.69	Paenibacillus_phyllosphaerae_(T)_PALXIL04_(AY598818)	88.5	1	0	0	0	129	0	0	0	0	0	0	0	0		0.000546212	0.985235		91	12	37
OTU_76	127	Root	Bacteria	Proteobacteria	.	Betaproteobacteria	.	Rhodocyclales	.	Rhodocyclaceae	.	Thauera	.	0.98	Azoarcus_olearius_DQS-4_(EF158388)	99.2	1	71	18	15	0	10	0	0	0	13	0	0	0		0.000537744	0.985773		100	0	4
OTU_72	125	Root	Bacteria	Proteobacteria	.	Deltaproteobacteria	.	.	.	Syntrophorhabdaceae	.	Syntrophorhabdus	.	0.99	Syntrophorhabdus_aromaticivorans_(T)_UI_(AB212873)	94.9	1	7	0	0	0	2	0	0	0	82	34	0	0		0.000529275	0.986302		99	18	100
OTU_75	118	Root	Bacteria	Proteobacteria	.	Deltaproteobacteria	.	Desulfuromonadales	.	Geobacteraceae	.	Geoalkalibacter	.	0.94	Geoalkalibacter_ferrihydriticus_(T)_Z-0531_(DQ309326)	96.8	1	4	0	0	0	2	0	0	0	61	51	0	0		0.000499636	0.986802		10	25	100
OTU_212	114	Root	Bacteria	Firmicutes	.	Clostridia	.	Natranaerobiales	.	Natranaerobiaceae	.	Dethiobacter	.	0.84	Dethiobacter_alkaliphilus_(T)_AHT_1_(EF422412)	95.3	1	1	0	0	0	63	30	0	0	15	5	0	0		0.000482699	0.987285		9	93	92
OTU_71	111	Root	Bacteria	Bacteroidetes	.	.	.	.	.	.	.	.	.	0.96	Crocinitomix_catalasitica_(T)_IFO_15977_(AB078042)	88.1	4	38	37	6	28	2	0	0	0	0	0	0	0		0.000469996	0.987755		100	0	0
OTU_78	101	Root	Bacteria	Firmicutes	.	Clostridia	.	.	.	.	.	.	.	0.65	Dethiobacter_alkaliphilus_(T)_AHT_1_(EF422412)	91.7	1	0	0	0	0	58	41	0	0	2	0	0	0		0.000427654	0.988182		3	100	8
OTU_73	92	Root	Bacteria	.	.	.	.	.	.	.	.	.	.	0.99	*	0	1	0	0	0	0	0	0	0	0	11	40	23	18		0.000389547	0.988572		25	0	100
OTU_79	92	Root	Bacteria	Proteobacteria	.	Deltaproteobacteria	.	Syntrophobacterales	.	Syntrophaceae	.	Smithella	.	0.58	Smithella_propionica_(T)_LYP_(AF126282)	92.5	2	59	32	0	0	1	0	0	0	0	0	0	0		0.000389547	0.988961		100	18	18
OTU_80	86	Root	Bacteria	Firmicutes	.	Clostridia	.	.	.	.	.	.	.	0.67	Desulfotomaculum_kuznetsovii_strain_17_(NR_115129.1)	89.7	2	0	0	0	0	50	35	0	0	1	0	0	0		0.000364141	0.989326		0	100	0
OTU_77	84	Root	Bacteria	Chloroflexi	.	Anaerolineae	.	Anaerolineales	.	Anaerolineaceae	.	.	.	0.99	Leptolinea_tardivitalis_(T)_YMTK-2_(AB109438)	93.7	1	0	0	0	0	29	37	18	0	0	0	0	0		0.000355673	0.989681		0	100	0
OTU_85	83	Root	Bacteria	Proteobacteria	.	Deltaproteobacteria	.	Syntrophobacterales	.	Syntrophaceae	.	Syntrophus	.	0.75	Smithella_propionica_(T)_LYP_(AF126282)	95.3	1	54	24	0	0	3	0	0	0	2	0	0	0		0.000351439	0.990033		100	11	17
OTU_82	79	Root	Bacteria	Actinobacteria	.	Actinobacteria	Coriobacteridae	Coriobacteriales	Coriobacterineae	Coriobacteriaceae	.	.	.	0.59	Atopobium_vaginae_(T)_CCUG_38953_(Y17195)	88.5	1	51	0	0	0	14	0	0	0	14	0	0	0		0.000334502	0.990367		47	31	23
OTU_81	78	Root	Bacteria	Firmicutes	.	Clostridia	.	Clostridiales	.	.	.	.	.	0.73	*	0	1	43	35	0	0	0	0	0	0	0	0	0	0		0.000330268	0.990697		100	9	9
OTU_84	75	Root	Bacteria	Firmicutes	.	Clostridia	.	Clostridiales	.	Ruminococcaceae	.	Ercella	.	0.99	Ruminococcaceae_bacterium_ZWB_4_(HG003571)	100	1	4	0	0	0	1	0	0	0	46	24	0	0		0.000317565	0.991015		91	0	100
OTU_83	71	Root	Bacteria	Chloroflexi	.	Anaerolineae	.	Anaerolineales	.	Anaerolineaceae	.	.	.	0.63	Longilinea_arvoryzae_(T)_KOME-1_(AB243673)	86.6	2	0	0	0	0	1	0	0	0	22	35	6	7		0.000300628	0.991316		0	21	100
OTU_201	65	Root	Bacteria	Synergistetes	.	Synergistia	.	Synergistales	.	Synergistaceae	.	Aminivibrio	.	0.91	Aminivibrio_pyruvatiphilus_4F6E_(AB623229)	91.7	1	60	5	0	0	0	0	0	0	0	0	0	0		0.000275223	0.991591		93	1	0
OTU_87	63	Root	Bacteria	Firmicutes	.	Clostridia	.	Clostridiales	.	.	.	.	.	0.52	Desulfotomaculum_varum_RH04-3_(GU126374)	88.2	1	2	0	0	0	0	0	0	0	39	11	11	0		0.000266755	0.991858		23	0	100
OTU_90	61	Root	Archaea	Euryarchaeota	.	Methanobacteria	.	Methanobacteriales	.	Methanobacteriaceae	.	Methanobacterium	.	1	Methanobacterium_formicicum_(T)_DSM_1535_(AF169245)	99.6	1	10	0	0	0	18	0	0	0	33	0	0	0		0.000258286	0.992116		0	14	100
OTU_86	60	Root	Bacteria	Firmicutes	.	Negativicutes	.	Selenomonadales	.	Veillonellaceae	.	.	.	0.83	Veillonella_magna_(T)_lac18_(EU096495)	89.3	1	5	0	0	0	0	0	0	0	28	27	0	0		0.000254052	0.99237		24	0	100
OTU_91	53	Root	Bacteria	Proteobacteria	.	Alphaproteobacteria	.	Sphingomonadales	.	Sphingomonadaceae	.	Sphingomonas	.	1	Sphingomonas_ginsenosidimutans_(T)_Gsoil_1429_(HM204925)	100	1	0	0	0	8	0	0	0	0	0	45	0	0		0.000224413	0.992594		100	0	100
OTU_89	52	Root	Bacteria	Firmicutes	.	Clostridia	.	Clostridiales	.	.	.	.	.	0.94	Clostridium_putrificum_(T)_DSM_1734_(X73442)	92.1	1	23	23	0	0	4	0	0	0	2	0	0	0		0.000220179	0.992815		100	18	22
OTU_88	52	Root	Bacteria	Acidobacteria	.	Acidobacteria_Gp3	.	.	.	.	.	Gp3	.	0.69	Acidobacteria_bacterium_P105_(KJ461654)	96	1	0	0	0	0	31	21	0	0	0	0	0	0		0.000220179	0.993035		0	100	0
OTU_100	47	Root	Bacteria	Proteobacteria	.	Alphaproteobacteria	.	Rhizobiales	.	.	.	.	.	0.63	Pedomicrobium_manganicum_(T)_ATCC_33121_(GU269549)	92.1	3	20	11	0	14	1	0	0	0	1	0	0	0		0.000199008	0.993234		100	0	0
OTU_103	45	Root	Bacteria	Firmicutes	.	Clostridia	.	Clostridiales	.	.	.	.	.	0.84	Gracilibacter_thermotolerans_(T)_JW/YJL-S1_(DQ117465)	90.5	1	18	0	0	0	0	0	0	0	14	13	0	0		0.000190539	0.993424		100	31	97
OTU_106	44	Root	Bacteria	Bacteroidetes	.	Bacteroidia	.	Bacteroidales	.	Porphyromonadaceae	.	Proteiniphilum	.	0.88	Proteiniphilum_acetatigenes_(T)_TB107_(AY742226)	98	1	27	6	0	0	4	0	0	0	7	0	0	0		0.000186305	0.993611		100	0	0
OTU_98	42	Root	Bacteria	Actinobacteria	.	Actinobacteria	Coriobacteridae	Coriobacteriales	Coriobacterineae	Coriobacteriaceae	.	.	.	0.5	Olegusella_massiliensis_strain_KHD7_(NR_146815.1)	89.7	1	0	0	0	0	20	21	0	0	1	0	0	0		0.000177836	0.993788		10	100	25
OTU_105	41	Root	Bacteria	Firmicutes	.	Clostridia	.	Clostridiales	.	Ruminococcaceae	.	Clostridium III	.	0.54	Clostridium_hungatei_(T)_AD;_ATCC_700212_(AF020429)	94.9	2	32	9	0	0	0	0	0	0	0	0	0	0		0.000173602	0.993962		100	7	29
OTU_94	41	Root	Bacteria	Firmicutes	.	Clostridia	.	Natranaerobiales	.	Natranaerobiaceae	.	Dethiobacter	.	0.58	Dethiobacter_alkaliphilus_(T)_AHT_1_(EF422412)	89.7	1	15	0	0	0	14	0	0	0	12	0	0	0		0.000173602	0.994136		4	4	22
OTU_92	38	Root	Bacteria	Firmicutes	.	Clostridia	.	Clostridiales	.	Clostridiaceae 1	.	Clostridium sensu stricto	.	1	Clostridium_thermopalmarium_(T)_(X72869)	98	1	0	0	0	0	0	0	0	0	17	21	0	0		0.0001609	0.994297		25	0	100
OTU_93	36	Root	Archaea	Euryarchaeota	.	Methanomicrobia	.	Methanomicrobiales	.	Methanoregulaceae	.	Methanolinea	.	0.91	Methanolinea_mesophila_TNR_(AB447467)	96.5	1	0	0	0	0	0	0	0	0	6	19	11	0		0.000152431	0.994449		5	0	100
OTU_102	35	Root	Bacteria	Bacteroidetes	.	Bacteroidia	.	Bacteroidales	.	Porphyromonadaceae	.	Petrimonas	.	0.95	Lascolabacillus_massiliensis_strain_SIT8_(NR_144720.1)	97.2	1	29	0	0	0	2	0	0	0	4	0	0	0		0.000148197	0.994597		75	0	0
OTU_99	35	Root	Bacteria	Bacteroidetes	.	.	.	.	.	.	.	.	.	0.99	Pedobacter_sp._MIC2002_(JX978785)	87	1	13	0	0	0	18	0	0	0	4	0	0	0		0.000148197	0.994745		4	39	21
OTU_97	33	Root	Bacteria	Firmicutes	.	Clostridia	.	Clostridiales	.	Ruminococcaceae	.	.	.	0.5	Thermincola_carboxydiphila_(T)_2204_(AY603000)	89.3	1	9	0	0	0	10	0	0	0	14	0	0	0		0.000139729	0.994885		39	15	16
OTU_101	33	Root	Bacteria	Firmicutes	.	Clostridia	.	Clostridiales	.	Eubacteriaceae	.	Alkalibacter	.	1	Alkalibacter_saccharofermentans_(T)_Z-79820_(AY312403)	100	1	18	0	0	0	9	0	0	0	6	0	0	0		0.000139729	0.995025		29	9	13
OTU_113	31	Root	Bacteria	Bacteroidetes	.	.	.	.	.	.	.	.	.	0.99	Alkalitalea_saponilacus_(T)_SC/BZ-SP2_(HQ191474)	88.9	2	30	0	0	0	1	0	0	0	0	0	0	0		0.00013126	0.995156		97	0	0
OTU_95	28	Root	Bacteria	Spirochaetes	.	Spirochaetia	.	Spirochaetales	.	Spirochaetaceae	.	Sphaerochaeta	.	1	Sphaerochaeta_globus_str._Buddy_(AF357916)	98.8	1	0	20	8	0	0	0	0	0	0	0	0	0		0.000118558	0.995275		100	0	0
OTU_96	28	Root	Bacteria	Firmicutes	.	Clostridia	.	Clostridiales	.	Syntrophomonadaceae	.	Syntrophomonas	.	0.94	Syntrophomonas_zehnderi_(T)_OL-4_(DQ898277)	94.5	1	0	0	0	0	2	0	0	0	2	24	0	0		0.000118558	0.995393		12	0	100
OTU_104	28	Root	Archaea	Euryarchaeota	.	Methanobacteria	.	Methanobacteriales	.	.	.	.	.	0.53	Methanobrevibacter_boviskoreani_JH1_(KC608769)	85.8	1	23	0	4	0	1	0	0	0	0	0	0	0		0.000118558	0.995512		100	0	0
OTU_108	27	Root	Bacteria	Firmicutes	.	.	.	.	.	.	.	.	.	0.96	Bacillaceae_bacterium_13CC_(JN571119)	90.9	1	10	0	0	0	10	0	0	0	7	0	0	0		0.000114323	0.995626		26	12	30
OTU_126	27	Root	Bacteria	Proteobacteria	.	Gammaproteobacteria	.	Pseudomonadales	.	Pseudomonadaceae	.	Pseudomonas	.	0.88	Pseudomonas_aestusnigri_CCUG_64165;_VGXO14_(HG004394)	98.4	1	18	0	0	0	4	0	0	0	5	0	0	0		0.000114323	0.99574		16	0	22
OTU_107	25	Root	Bacteria	Firmicutes	.	Clostridia	.	Clostridiales	.	.	.	Vallitalea	.	0.66	Vallitalea_pronyensis_FatNI3_(KC876639)	96	1	1	0	0	0	0	0	0	0	17	7	0	0		0.000105855	0.995846		26	22	100
OTU_112	25	Root	Bacteria	Bacteroidetes	.	.	.	.	.	.	.	.	.	0.98	Lutaonella_thermophila_(T)_CC-MHSW-2_(EU287913)	86.6	1	15	0	0	0	5	0	0	0	5	0	0	0		0.000105855	0.995952		35	1	3
OTU_124	25	Root	Bacteria	Firmicutes	.	Clostridia	.	Clostridiales	.	.	.	.	.	0.97	Clostridium_acetireducens_(T)_30A_(X79862)	93.7	2	25	0	0	0	0	0	0	0	0	0	0	0		0.000105855	0.996058		100	15	27
OTU_147	24	Root	Bacteria	Firmicutes	.	.	.	.	.	.	.	.	.	0.55	Anaerobacterium_chartisolvens_T-1-35_(AB793710)	86.6	3	11	0	0	0	9	0	0	0	4	0	0	0		0.000101621	0.99616		66	0	0
OTU_110	24	Root	Bacteria	Chloroflexi	.	Anaerolineae	.	Anaerolineales	.	Anaerolineaceae	.	Ornatilinea	.	0.57	Ornatilinea_apprima_P3M-1_(JQ292916)	93.7	1	0	0	0	0	2	0	0	0	8	14	0	0		0.000101621	0.996261		8	22	97
OTU_117	23	Root	Bacteria	Proteobacteria	.	Gammaproteobacteria	.	Chromatiales	.	.	.	.	.	0.56	Spiribacter_salinus_M19-40_(CP005963)	92.9	2	14	0	0	0	5	0	0	0	4	0	0	0		9.73867e-05	0.996359		0	0	0
OTU_109	23	Root	Bacteria	Firmicutes	.	Clostridia	.	Clostridiales	.	.	.	.	.	0.85	Pelotomaculum_thermopropionicum_(T)_SI_(AB035723)	88.5	1	0	0	0	0	0	0	0	0	16	7	0	0		9.73867e-05	0.996456		18	19	100
OTU_111	22	Root	Bacteria	Firmicutes	.	.	.	.	.	.	.	.	.	0.72	Gelria_glutamica_(T)_TGO_(AF321086)	87.4	1	8	0	0	0	4	0	0	0	10	0	0	0		9.31524e-05	0.996549		97	15	84
OTU_131	21	Root	Bacteria	Firmicutes	.	Clostridia	.	Clostridiales	.	Syntrophomonadaceae	.	Syntrophomonas	.	0.63	Pelospora_glutarica_(T)_WoGl3_(AJ251214)	96	1	6	0	0	0	1	0	0	0	11	3	0	0		8.89182e-05	0.996638		8	0	100
OTU_121	21	Root	Bacteria	Firmicutes	.	Clostridia	.	Clostridiales	.	Syntrophomonadaceae	.	Syntrophomonas	.	0.98	Syntrophomonas_zehnderi_(T)_OL-4_(DQ898277)	95.3	1	11	0	0	0	9	0	0	0	1	0	0	0		8.89182e-05	0.996727		100	25	10
OTU_114	20	Root	Bacteria	Firmicutes	.	Bacilli	.	Lactobacillales	.	Lactobacillaceae	.	Lactobacillus	.	1	Lactobacillus_gasseri_(T)_ATCC_33323_(AF519171)	100	4	0	0	0	0	13	0	0	0	7	0	0	0		8.4684e-05	0.996812		0	0	0
OTU_122	19	Root	Bacteria	Actinobacteria	.	Actinobacteria	Rubrobacteridae	.	.	.	.	.	.	0.56	Streptomyces_aomiensis_(T)_M24DS04_(AB522686)	89.3	3	11	0	0	0	0	0	0	0	8	0	0	0		8.04498e-05	0.996892		100	0	100
OTU_123	18	Root	Bacteria	Bacteroidetes	.	Bacteroidia	.	Bacteroidales	.	Prolixibacteraceae	.	.	.	0.67	Mariniphaga_sediminis_strain_SY21_(NR_137221.1)	91.3	1	16	0	0	0	1	0	0	0	1	0	0	0		7.62156e-05	0.996968		77	4	32
OTU_148	17	Root	Bacteria	Bacteroidetes	.	.	.	.	.	.	.	.	.	0.99	Cytophaga_xylanolytica_strain_DSM_6779_(NR_117112.1)	86.2	2	5	0	0	0	6	0	0	0	6	0	0	0		7.19814e-05	0.99704		21	0	4
OTU_133	16	Root	Bacteria	Proteobacteria	.	Alphaproteobacteria	.	Rhizobiales	.	Rhodobiaceae	.	Parvibaculum	.	1	Parvibaculum_lavamentivorans_(T)_DS-1_(AY387398)	100	1	5	0	0	0	7	0	0	0	4	0	0	0		6.77472e-05	0.997108		3	0	3
OTU_129	16	Root	Bacteria	Firmicutes	.	Clostridia	.	Clostridiales	.	.	.	.	.	1	Natranaerovirga_pectinivora_(T)_AP3_(GQ922846)	94.9	1	5	0	0	0	6	0	0	0	5	0	0	0		6.77472e-05	0.997176		52	22	42
OTU_132	15	Root	Bacteria	Ignavibacteriae	.	Ignavibacteria	.	Ignavibacteriales	.	Ignavibacteriaceae	.	Melioribacter	.	0.81	Melioribacter_roseus_P3M-2_(JQ292917)	95.7	1	6	0	0	0	5	0	0	0	4	0	0	0		6.3513e-05	0.997239		12	0	0
OTU_145	15	Root	Bacteria	Bacteroidetes	.	.	.	.	.	.	.	.	.	1	Sunxiuqinia_faeciviva_(T)_JAM-BA0302_(AB362263)	85.8	1	5	0	0	0	6	0	0	0	4	0	0	0		6.3513e-05	0.997303		0	0	0
OTU_115	14	Root	Bacteria	Bacteroidetes	.	Bacteroidia	.	Bacteroidales	.	Porphyromonadaceae	.	.	.	0.97	Muribaculum_intestinale_strain_YL27_(NR_144616.1)	93.7	1	5	0	0	0	6	0	0	0	3	0	0	0		5.92788e-05	0.997362		2	1	3
OTU_153	14	Root	Bacteria	Tenericutes	.	Mollicutes	.	Acholeplasmatales	.	Acholeplasmataceae	.	Acholeplasma	.	0.99	Acholeplasma_parvum_(T)_H23M_(AY538170)	94.8	1	6	0	0	0	3	0	0	0	5	0	0	0		5.92788e-05	0.997421		0	0	0
OTU_116	14	Root	Bacteria	Verrucomicrobia	.	Verrucomicrobiae	.	Verrucomicrobiales	.	Verrucomicrobiaceae	.	Akkermansia	.	1	Akkermansia_muciniphila_(T)_Muc_(AY271254)	100	1	14	0	0	0	0	0	0	0	0	0	0	0		5.92788e-05	0.997481		0	0	0
OTU_118	14	Root	Bacteria	Spirochaetes	.	Spirochaetia	.	Spirochaetales	.	Spirochaetaceae	.	Treponema	.	1	Treponema_caldarium_(T)_DSMZ7334_(EU580141)	96	1	8	0	3	2	0	0	0	0	1	0	0	0		5.92788e-05	0.99754		100	0	6
OTU_137	13	Root	Bacteria	Firmicutes	.	Clostridia	.	Clostridiales	.	Ruminococcaceae	.	Clostridium III	.	0.72	[Clostridium]_caenicola_strain_EBR596_(NR_126170.1)	94.9	1	1	0	0	0	0	0	0	0	11	1	0	0		5.50446e-05	0.997595		9	16	100
OTU_135	13	Root	Bacteria	Firmicutes	.	Clostridia	.	Clostridiales	.	Gracilibacteraceae	.	.	.	0.5	Gracilibacter_thermotolerans_(T)_JW/YJL-S1_(DQ117465)	90.1	1	1	0	0	0	3	0	0	0	9	0	0	0		5.50446e-05	0.99765		44	43	100
OTU_154	13	Root	Bacteria	Synergistetes	.	Synergistia	.	Synergistales	.	Synergistaceae	.	Thermovirga	.	0.88	Thermovirga_lienii_(T)_Cas60314_(DQ071273)	91.7	1	1	0	0	0	7	0	0	0	5	0	0	0		5.50446e-05	0.997705		5	8	15
OTU_170	12	Root	Archaea	Euryarchaeota	.	Methanobacteria	.	Methanobacteriales	.	Methanobacteriaceae	.	Methanobacterium	.	1	Methanobacterium_oryzae_(T)_FPi_(AF028690)	99.6	1	2	0	0	0	8	0	0	0	2	0	0	0		5.08104e-05	0.997756		0	5	10
OTU_120	12	Root	Bacteria	Bacteroidetes	.	Bacteroidia	.	Bacteroidales	.	Porphyromonadaceae	.	.	.	0.85	Muribaculum_intestinale_strain_YL27_(NR_144616.1)	89.7	1	5	0	0	0	4	0	0	0	3	0	0	0		5.08104e-05	0.997807		0	0	0
OTU_119	12	Root	Bacteria	Firmicutes	.	.	.	.	.	.	.	.	.	0.84	Vallitalea_pronyensis_FatNI3_(KC876639)	88.5	1	0	0	0	0	0	0	0	0	0	12	0	0		5.08104e-05	0.997857		0	2	91
OTU_140	12	Root	Bacteria	Proteobacteria	.	Alphaproteobacteria	.	Rhodobacterales	.	Rhodobacteraceae	.	.	.	1	Paracoccus_aestuarii_(T)_B7_(EF660757)	99.2	7	5	0	0	0	4	0	0	0	3	0	0	0		5.08104e-05	0.997908		22	0	32
OTU_130	12	Root	Bacteria	Firmicutes	.	Bacilli	.	Bacillales	.	Bacillales_incertae_sedis	.	Desulfuribacillus	.	1	Desulfuribacillus_alkaliarsenatis_AHT28_(HM046584)	99.2	1	1	0	0	0	1	0	0	0	10	0	0	0		5.08104e-05	0.997959		85	8	100
OTU_128	12	Root	Bacteria	Firmicutes	.	Bacilli	.	Lactobacillales	.	Lactobacillaceae	.	Lactobacillus	.	0.97	Lactobacillus_faecis_AFL13-2_(AB812750)	100	4	0	0	0	0	7	0	0	0	5	0	0	0		5.08104e-05	0.99801		0	0	0
OTU_125	11	Root	Bacteria	Bacteroidetes	.	Bacteroidia	.	Bacteroidales	.	Porphyromonadaceae	.	Odoribacter	.	0.99	Culturomica_massiliensis_strain_Marseille-P2698_(NR_144745.1)	93.3	1	0	0	0	0	9	0	0	0	2	0	0	0		4.65762e-05	0.998057		2	1	2
OTU_127	11	Root	Bacteria	.	.	.	.	.	.	.	.	.	.	1	Desulfosporosinus_orientis_(T)_DSM_765_(Y11570)	89.7	3	0	0	0	0	0	0	0	0	11	0	0	0		4.65762e-05	0.998103		16	13	100
OTU_146	11	Root	Bacteria	Proteobacteria	.	Deltaproteobacteria	.	Syntrophobacterales	.	Syntrophaceae	.	.	.	0.97	Smithella_propionica_(T)_LYP_(AF126282)	94.5	1	9	0	0	0	1	0	0	0	1	0	0	0		4.65762e-05	0.99815		99	10	94
OTU_142	10	Root	Bacteria	Chloroflexi	.	Anaerolineae	.	Anaerolineales	.	Anaerolineaceae	.	.	.	0.65	Bellilinea_caldifistulae_(T)_GOMI-1_(AB243672)	87.7	1	0	0	0	0	4	0	0	0	6	0	0	0		4.2342e-05	0.998192		0	87	67
OTU_144	10	Root	Bacteria	Bacteroidetes	.	Bacteroidia	.	Bacteroidales	.	.	.	.	.	0.72	Porphyromonas_pogonae_strain_MI_10-1288_(NR_136443.1)	86.2	1	5	0	0	0	0	0	0	0	5	0	0	0		4.2342e-05	0.998234		48	1	78
OTU_205	10	Root	Bacteria	Bacteroidetes	.	.	.	.	.	.	.	.	.	0.98	Natronoflexus_pectinivorans_AP1_(GQ922844)	88.1	2	3	0	0	0	2	0	0	0	5	0	0	0		4.2342e-05	0.998277		0	0	0
OTU_186	10	Root	Bacteria	Firmicutes	.	Clostridia	.	Clostridiales	.	.	.	.	.	0.55	Desulfitobacterium_hafniense_(T)_DCB-2_(CP001336)	88.5	6	3	0	0	0	0	0	0	0	7	0	0	0		4.2342e-05	0.998319		57	8	100
OTU_141	10	Root	Bacteria	Firmicutes	.	Clostridia	.	Clostridiales	.	Clostridiales_Incertae Sedis XI	.	Tissierella	.	0.61	Soehngenia_saccharolytica_(T)_BOR-Y_(AY353956)	96.8	1	4	0	0	0	2	0	0	0	4	0	0	0		4.2342e-05	0.998361		3	0	7
OTU_179	10	Root	Bacteria	Firmicutes	.	Clostridia	.	.	.	.	.	.	.	0.61	Caloramator_fervidus_(T)_RT4._B1_(L09187)	89.7	1	0	0	0	0	9	0	0	0	1	0	0	0		4.2342e-05	0.998404		15	100	40
OTU_150	10	Root	Bacteria	Tenericutes	.	Mollicutes	.	Acholeplasmatales	.	Acholeplasmataceae	.	Acholeplasma	.	0.9	Acholeplasma_parvum_(T)_H23M_(AY538170)	92.9	1	1	0	0	0	2	0	0	0	7	0	0	0		4.2342e-05	0.998446		0	0	0
OTU_167	9	Root	Bacteria	Bacteroidetes	.	Flavobacteriia	.	Flavobacteriales	.	.	.	.	.	0.5	Cytophaga_fermentans_(T)_ATCC_19072_(M58766)	88.9	1	0	0	0	0	5	0	0	0	4	0	0	0		3.81078e-05	0.998484		0	0	0
OTU_183	9	Root	Bacteria	Proteobacteria	.	Deltaproteobacteria	.	Desulfovibrionales	.	Desulfovibrionaceae	.	Desulfovibrio	.	1	Desulfovibrio_psychrotolerans_(T)_type_strain:_PWC_=_JS1_(AM418397)	99.2	1	7	0	0	0	1	0	0	0	1	0	0	0		3.81078e-05	0.998522		72	0	0
OTU_177	9	Root	Bacteria	Bacteroidetes	.	Bacteroidia	.	Bacteroidales	.	Porphyromonadaceae	.	.	.	0.87	Muribaculum_intestinale_strain_YL27_(NR_144616.1)	91.3	1	2	0	0	0	2	0	0	0	5	0	0	0		3.81078e-05	0.99856		3	1	3
OTU_164	9	Root	Bacteria	.	.	.	.	.	.	.	.	.	.	1	Thermanaerovibrio_acidaminovorans_strain_DSM_6589_(NR_114455.1)	87	1	0	0	0	0	9	0	0	0	0	0	0	0		3.81078e-05	0.998598		15	74	44
OTU_159	9	Root	Bacteria	.	.	.	.	.	.	.	.	.	.	1	*	0	1	3	0	0	0	4	0	0	0	2	0	0	0		3.81078e-05	0.998637		0	12	20
OTU_156	9	Root	Bacteria	Firmicutes	.	Clostridia	.	Thermoanaerobacterales	.	Thermoanaerobacteraceae	.	Moorella	.	0.98	Moorella_glycerini_(T)_YS6_(U82327)	95.7	3	0	0	0	0	3	0	0	0	6	0	0	0		3.81078e-05	0.998675		11	73	100
OTU_138	9	Root	Bacteria	Firmicutes	.	Clostridia	.	Clostridiales	.	.	.	.	.	0.84	Gracilibacter_thermotolerans_(T)_JW/YJL-S1_(DQ117465)	91.7	1	0	0	0	0	0	0	0	0	0	9	0	0		3.81078e-05	0.998713		75	33	100
OTU_152	9	Root	Bacteria	Deferribacteres	.	Deferribacteres	.	Deferribacterales	.	Deferribacteraceae	.	Geovibrio	.	1	Geovibrio_ferrireducens_(T)_PAL-1_(X95744)	99.2	1	3	0	0	0	5	0	0	0	1	0	0	0		3.81078e-05	0.998751		40	0	0
OTU_149	9	Root	Bacteria	Firmicutes	.	Clostridia	.	Clostridiales	.	Clostridiaceae 2	.	Anoxynatronum	.	0.58	Anoxynatronum_sibiricum_(T)_Z-7981_(AF522323)	99.2	1	7	0	0	0	1	0	0	0	1	0	0	0		3.81078e-05	0.998789		76	9	34
OTU_139	8	Root	Bacteria	Firmicutes	.	Clostridia	.	Clostridiales	.	.	.	.	.	0.99	Christensenella_minuta_YIT_12065_(AB490809)	93.3	1	8	0	0	0	0	0	0	0	0	0	0	0		3.38736e-05	0.998823		20	9	23
OTU_171	8	Root	Bacteria	Bacteroidetes	.	Bacteroidia	.	Bacteroidales	.	Porphyromonadaceae	.	.	.	0.97	Muribaculum_intestinale_strain_YL27_(NR_144616.1)	93.7	1	2	0	0	0	3	0	0	0	3	0	0	0		3.38736e-05	0.998857		0	0	0
OTU_134	8	Root	Bacteria	Firmicutes	.	.	.	.	.	.	.	.	.	0.59	*	0	1	3	0	0	0	3	0	0	0	2	0	0	0		3.38736e-05	0.998891		11	1	0
OTU_157	8	Root	Bacteria	Bacteroidetes	.	Bacteroidia	.	Bacteroidales	.	Porphyromonadaceae	.	Petrimonas	.	0.88	Petrimonas_sulfuriphila_(T)_BN3_(AY570690)	95.3	1	7	0	0	0	0	0	0	0	1	0	0	0		3.38736e-05	0.998925		78	0	0
OTU_143	7	Root	Archaea	Euryarchaeota	.	Methanobacteria	.	Methanobacteriales	.	Methanobacteriaceae	.	Methanobacterium	.	0.98	Methanobacterium_subterraneum_(T)_A8p,_DSM_11074_(X99044)	96.9	1	0	0	0	0	0	0	0	0	0	7	0	0		2.96394e-05	0.998954		0	29	100
OTU_220	7	Root	Bacteria	Firmicutes	.	Clostridia	.	Clostridiales	.	Clostridiaceae 2	.	Alkaliphilus	.	0.87	Alkaliphilus_peptidifermentans_(T)_Z-7036_(EF382660)	98.8	1	4	0	0	0	1	0	0	0	2	0	0	0		2.96394e-05	0.998984		38	8	47
OTU_184	7	Root	Bacteria	Proteobacteria	.	Deltaproteobacteria	.	Syntrophobacterales	.	Syntrophaceae	.	Smithella	.	0.93	Smithella_propionica_(T)_LYP_(AF126282)	92.9	1	2	0	0	0	1	0	0	0	4	0	0	0		2.96394e-05	0.999013		3	4	4
OTU_221	7	Root	Bacteria	Chloroflexi	.	Anaerolineae	.	Anaerolineales	.	Anaerolineaceae	.	Ornatilinea	.	0.93	Ornatilinea_apprima_P3M-1_(JQ292916)	89.3	1	3	0	0	0	3	0	0	0	1	0	0	0		2.96394e-05	0.999043		48	6	6
OTU_207	7	Root	Bacteria	Firmicutes	.	Clostridia	.	Natranaerobiales	.	Natranaerobiaceae	.	Dethiobacter	.	0.96	Dethiobacter_alkaliphilus_(T)_AHT_1_(EF422412)	96	1	0	0	0	0	3	0	0	0	4	0	0	0		2.96394e-05	0.999073		5	23	91
OTU_185	7	Root	Bacteria	Firmicutes	.	Clostridia	.	Clostridiales	.	Ruminococcaceae	.	Acetanaerobacterium	.	0.64	Acetanaerobacterium_elongatum_(T)_Z7_(AY487928)	91.7	1	2	0	0	0	1	0	0	0	4	0	0	0		2.96394e-05	0.999102		68	0	50
OTU_136	7	Root	Bacteria	Chloroflexi	.	Anaerolineae	.	Anaerolineales	.	Anaerolineaceae	.	Ornatilinea	.	0.57	anaerobic_bacterium_MO-CFX1_(AB598277)	91.7	1	0	0	0	0	0	0	0	0	7	0	0	0		2.96394e-05	0.999132		8	7	100
OTU_155	7	Root	Bacteria	Bacteroidetes	.	Bacteroidia	.	Bacteroidales	.	Porphyromonadaceae	.	Coprobacter	.	0.51	Muribaculum_intestinale_strain_YL27_(NR_144616.1)	94.8	1	0	0	0	0	5	0	0	0	2	0	0	0		2.96394e-05	0.999162		2	1	3
OTU_158	7	Root	Bacteria	.	.	.	.	.	.	.	.	.	.	0.99	Aminobacterium_colombiense_strain_DSM_12261_(NR_074624.1)	85.8	2	4	0	0	0	2	0	0	0	1	0	0	0		2.96394e-05	0.999191		0	7	0
OTU_151	7	Root	Bacteria	Proteobacteria	.	.	.	.	.	.	.	.	.	0.53	*	0	1	1	0	0	0	5	0	0	0	1	0	0	0		2.96394e-05	0.999221		0	0	0
OTU_169	6	Root	Bacteria	Firmicutes	.	Clostridia	.	Thermoanaerobacterales	.	Thermoanaerobacteraceae	.	.	.	0.8	Thermoanaerobacter_thermocopriae_(T)_JT-3T_(L09167)	91.7	3	6	0	0	0	0	0	0	0	0	0	0	0		2.54052e-05	0.999246		28	9	44
OTU_160	6	Root	Bacteria	Firmicutes	.	.	.	.	.	.	.	.	.	0.51	Calditerricola_yamamurae_(T)_YMO722_(AB308475)	86.6	2	3	0	0	0	1	0	0	0	2	0	0	0		2.54052e-05	0.999272		0	0	0
OTU_165	6	Root	Bacteria	Chloroflexi	.	Anaerolineae	.	Anaerolineales	.	Anaerolineaceae	.	.	.	0.95	Thermanaerothrix_daxensis_strain_GNS-1_(NR_117865.1)	85.4	1	2	0	0	0	4	0	0	0	0	0	0	0		2.54052e-05	0.999297		62	83	2
OTU_161	6	Root	Bacteria	Proteobacteria	.	Deltaproteobacteria	.	Desulfuromonadales	.	Desulfuromonadaceae	.	Desulfuromonas	.	0.95	Desulfuromonas_thiophila_(T)_NZ27_(DSMZ_8987)_(Y11560)	96.4	2	5	0	0	0	1	0	0	0	0	0	0	0		2.54052e-05	0.999323		28	0	11
OTU_162	6	Root	Bacteria	Proteobacteria	.	Gammaproteobacteria	.	Enterobacteriales	.	Enterobacteriaceae	.	Citrobacter	.	0.59	Citrobacter_sedlakii_(T)_CDC_4696-86_(AF025364)	100	4	4	0	0	0	1	0	0	0	1	0	0	0		2.54052e-05	0.999348		85	0	1
OTU_176	6	Root	Bacteria	Firmicutes	.	Clostridia	.	Clostridiales	.	Clostridiales_Incertae Sedis XI	.	Sedimentibacter	.	1	Sedimentibacter_saalensis_(T)_ZF2_(AJ404680)	99.6	1	1	0	0	0	3	0	0	0	2	0	0	0		2.54052e-05	0.999373		25	9	17
OTU_163	6	Root	Bacteria	Firmicutes	.	Clostridia	.	Clostridiales	.	Clostridiaceae 2	.	Alkaliphilus	.	1	Alkaliphilus_crotonatoxidans_(T)_B11-2_(AF467248)	100	2	5	0	0	0	1	0	0	0	0	0	0	0		2.54052e-05	0.999399		30	22	44
OTU_192	6	Root	Bacteria	Proteobacteria	.	Deltaproteobacteria	.	Syntrophobacterales	.	Syntrophaceae	.	Smithella	.	0.64	Smithella_propionica_(T)_LYP_(AF126282)	97.2	1	5	0	0	0	1	0	0	0	0	0	0	0		2.54052e-05	0.999424		45	41	44
OTU_214	6	Root	Bacteria	Thermotogae	.	Thermotogae	.	Kosmotogales	.	Kosmotogaceae	.	Mesotoga	.	1	Thermotogales_bacterium_MesG1Ag4.2.16S.B_(HM003109)	98.4	1	3	0	0	0	3	0	0	0	0	0	0	0		2.54052e-05	0.99945		0	0	0
OTU_166	5	Root	Bacteria	Firmicutes	.	Clostridia	.	Clostridiales	.	.	.	.	.	0.99	Defluviitalea_saccharophila_(T)_LIND6LT2_(HQ020487)	92.9	1	1	0	0	0	0	0	0	0	4	0	0	0		2.1171e-05	0.999471		42	17	62
OTU_219	5	Root	Bacteria	.	.	.	.	.	.	.	.	.	.	1	Streptomyces_cinereorectus_(T)_NBRC_15395_(AB184646)	86.6	12	0	0	0	0	5	0	0	0	0	0	0	0		2.1171e-05	0.999492		0	98	9
OTU_206	5	Root	Bacteria	Firmicutes	.	Clostridia	.	Clostridiales	.	.	.	.	.	0.69	Moorella_humiferrea_(T)_64_FGQ_(GQ872425)	92.9	1	4	0	0	0	0	0	0	0	1	0	0	0		2.1171e-05	0.999513		44	4	69
OTU_199	5	Root	Archaea	Euryarchaeota	.	Methanomicrobia	.	Methanomicrobiales	.	Methanomicrobiaceae	.	Methanofollis	.	1	Methanofollis_tationis_(T)_DSM_2702_(AF095272)	99.6	2	3	0	0	0	1	0	0	0	1	0	0	0		2.1171e-05	0.999534		0	0	0
OTU_208	5	Root	Bacteria	Chloroflexi	.	Anaerolineae	.	Anaerolineales	.	Anaerolineaceae	.	.	.	1	Levilinea_saccharolytica_(T)_KIBI-1_(AB109439)	95.3	1	0	0	0	0	4	0	0	0	1	0	0	0		2.1171e-05	0.999555		12	100	40
OTU_168	5	Root	Bacteria	Firmicutes	.	Clostridia	.	Clostridiales	.	Clostridiales_Incertae Sedis XIV	.	Anaerobranca	.	1	Anaerobranca_zavarzinii_(T)_JW/VK-KS5Y_(EF190921)	100	1	1	0	0	0	3	0	0	0	1	0	0	0		2.1171e-05	0.999577		16	1	22
OTU_188	5	Root	Bacteria	Bacteroidetes	.	Bacteroidia	.	Bacteroidales	.	Porphyromonadaceae	.	.	.	0.84	Muribaculum_intestinale_strain_YL27_(NR_144616.1)	89.3	1	2	0	0	0	1	0	0	0	2	0	0	0		2.1171e-05	0.999598		0	0	0
OTU_180	4	Root	Bacteria	Proteobacteria	.	Alphaproteobacteria	.	Rhizobiales	.	Methylocystaceae	.	Pleomorphomonas	.	0.99	Pleomorphomonas_diazotrophica_R5-392_(JQ346801)	100	2	1	0	0	0	3	0	0	0	0	0	0	0		1.69368e-05	0.999615		16	0	17
OTU_173	4	Root	Bacteria	Proteobacteria	.	Alphaproteobacteria	.	Rhizobiales	.	Phyllobacteriaceae	.	.	.	0.93	Mesorhizobium_camelthorni_(T)_CCNWXJ40-4_(EU169581)	99.6	1	2	0	0	0	2	0	0	0	0	0	0	0		1.69368e-05	0.999632		23	0	28
OTU_215	4	Root	Bacteria	Firmicutes	.	Clostridia	.	Clostridiales	.	.	.	.	.	0.55	Lutispora_thermophila_(T)_EBR46_(AB186360)	89.3	2	3	0	0	0	1	0	0	0	0	0	0	0		1.69368e-05	0.999649		18	12	19
OTU_217	4	Root	Bacteria	.	.	.	.	.	.	.	.	.	.	1	uncultured_candidate_division_BRC1_bacterium_LD1-PA21_(AY114315)	89.3	1	4	0	0	0	0	0	0	0	0	0	0	0		1.69368e-05	0.999665		64	0	0
OTU_218	4	Root	Bacteria	Firmicutes	.	Clostridia	.	Clostridiales	.	.	.	.	.	0.69	Gelria_glutamica_(T)_TGO_(AF321086)	89.7	1	0	0	0	0	4	0	0	0	0	0	0	0		1.69368e-05	0.999682		18	83	18
OTU_187	4	Root	Bacteria	Firmicutes	.	Clostridia	.	Clostridiales	.	Ruminococcaceae	.	Clostridium III	.	0.9	Pseudobacteroides_cellulosolvens_(L35517)	95.7	3	0	0	0	0	0	0	0	0	4	0	0	0		1.69368e-05	0.999699		47	15	100
OTU_209	4	Root	Bacteria	Bacteroidetes	.	.	.	.	.	.	.	.	.	1	Cytophaga_xylanolytica_strain_DSM_6779_(NR_117112.1)	85.8	1	1	0	0	0	2	0	0	0	1	0	0	0		1.69368e-05	0.999716		13	2	2
OTU_175	4	Root	Bacteria	Bacteroidetes	.	Bacteroidia	.	Bacteroidales	.	Porphyromonadaceae	.	Coprobacter	.	0.5	Muribaculum_intestinale_strain_YL27_(NR_144616.1)	90.5	1	0	0	0	0	1	0	0	0	3	0	0	0		1.69368e-05	0.999733		2	7	2
OTU_182	4	Root	Bacteria	Firmicutes	.	Clostridia	.	Clostridiales	.	.	.	.	.	0.79	Desulfotomaculum_acetoxidans_(T)_DSM_771_(Y11566)	90.9	1	1	0	0	0	2	0	0	0	1	0	0	0		1.69368e-05	0.99975		15	19	47
OTU_178	4	Root	Bacteria	Proteobacteria	.	Deltaproteobacteria	.	Syntrophobacterales	.	Syntrophaceae	.	Smithella	.	0.7	Smithella_propionica_(T)_LYP_(AF126282)	93.3	1	2	0	0	0	2	0	0	0	0	0	0	0		1.69368e-05	0.999767		0	0	0
OTU_196	3	Root	Bacteria	Bacteroidetes	.	Bacteroidia	.	Bacteroidales	.	Porphyromonadaceae	.	.	.	0.98	Muribaculum_intestinale_strain_YL27_(NR_144616.1)	96.4	1	1	0	0	0	0	0	0	0	2	0	0	0		1.27026e-05	0.99978		0	0	0
OTU_181	3	Root	Bacteria	.	.	.	.	.	.	.	.	.	.	0.9	*	0	1	0	0	1	0	0	0	1	0	0	0	1	0		1.27026e-05	0.999793		36	22	8
OTU_204	3	Root	Bacteria	Firmicutes	.	Clostridia	.	Clostridiales	.	Lachnospiraceae	.	Clostridium XlVa	.	1	Clostridium_saccharolyticum_(T)_DSM_2544_(Y18185)	100	1	0	0	0	0	0	0	0	0	3	0	0	0		1.27026e-05	0.999805		22	13	81
OTU_193	3	Root	Bacteria	Proteobacteria	.	Betaproteobacteria	.	Procabacteriales	.	Procabacteriaceae	.	Candidatus Procabacter	.	1	Candidatus_Procabacter_acanthamoebae_(AF177427)	99.2	1	2	0	0	0	1	0	0	0	0	0	0	0		1.27026e-05	0.999818		0	0	0
OTU_191	3	Root	Bacteria	Chloroflexi	.	Anaerolineae	.	Anaerolineales	.	Anaerolineaceae	.	.	.	0.8	*	0	1	3	0	0	0	0	0	0	0	0	0	0	0		1.27026e-05	0.999831		85	6	11
OTU_174	3	Root	Bacteria	Bacteroidetes	.	Bacteroidia	.	Bacteroidales	.	Porphyromonadaceae	.	.	.	0.97	Muribaculum_intestinale_strain_YL27_(NR_144616.1)	91.7	1	2	0	0	0	0	0	0	0	1	0	0	0		1.27026e-05	0.999843		2	7	2
OTU_202	3	Root	Archaea	Euryarchaeota	.	Methanomicrobia	.	Methanomicrobiales	.	Methanoregulaceae	.	Methanoregula	.	1	Methanoregula_formicica_(T)_SMSP_(AB479390)	99.6	1	3	0	0	0	0	0	0	0	0	0	0	0		1.27026e-05	0.999856		96	0	5
OTU_224	3	Root	Bacteria	Firmicutes	.	Clostridia	.	Clostridiales	.	.	.	.	.	0.65	Gracilibacter_thermotolerans_(T)_JW/YJL-S1_(DQ117465)	90.5	1	0	0	0	0	2	0	0	0	1	0	0	0		1.27026e-05	0.999869		14	8	26
OTU_213	3	Root	Bacteria	Acidobacteria	.	Acidobacteria_Gp23	.	.	.	.	.	Thermoanaerobaculum	.	0.56	uncultured_bacterium_FW34_(AF523981)	94.5	1	3	0	0	0	0	0	0	0	0	0	0	0		1.27026e-05	0.999881		61	0	0
OTU_223	3	Root	Bacteria	Acidobacteria	.	Acidobacteria_Gp23	.	.	.	.	.	Gp23	.	0.65	uncultured_bacterium_FW34_(AF523981)	96	1	3	0	0	0	0	0	0	0	0	0	0	0		1.27026e-05	0.999894		45	0	0
OTU_225	3	Root	Bacteria	Bacteroidetes	.	Bacteroidia	.	Bacteroidales	.	Porphyromonadaceae	.	.	.	0.97	Muribaculum_intestinale_strain_YL27_(NR_144616.1)	93.7	1	0	0	0	0	1	0	0	0	2	0	0	0		1.27026e-05	0.999907		2	1	3
OTU_189	2	Root	Bacteria	Firmicutes	.	Clostridia	.	Clostridiales	.	Peptococcaceae 1	.	.	.	0.94	Dehalobacter_restrictus_(T)_PER-K23_(U84497)	95.6	1	2	0	0	0	0	0	0	0	0	0	0	0		8.4684e-06	0.999915		65	30	68
OTU_216	2	Root	Bacteria	Bacteroidetes	.	Bacteroidia	.	Bacteroidales	.	Bacteroidaceae	.	Bacteroides	.	1	Bacteroides_acidifaciens_(T)_A40_(AB021164)	100	1	1	0	0	0	1	0	0	0	0	0	0	0		8.4684e-06	0.999924		15	0	0
OTU_194	2	Root	Bacteria	Firmicutes	.	Clostridia	.	Clostridiales	.	Ruminococcaceae	.	Saccharofermentans	.	0.91	Saccharofermentans_acetigenes_(T)_P6_(AY949857)	95.3	1	2	0	0	0	0	0	0	0	0	0	0	0		8.4684e-06	0.999932		11	0	11
OTU_190	2	Root	Bacteria	Firmicutes	.	Clostridia	.	.	.	.	.	.	.	0.88	Desulfurispora_thermophila_(T)_RA50E1_(AY548776)	90.9	1	0	0	0	0	2	0	0	0	0	0	0	0		8.4684e-06	0.999941		7	63	9
OTU_211	2	Root	Bacteria	Proteobacteria	.	Betaproteobacteria	.	Burkholderiales	.	Comamonadaceae	.	Hydrogenophaga	.	0.51	Hydrogenophaga_defluvii_(T)_type_strain:_BSB_9.5_(AJ585993)	98.8	3	0	0	0	0	0	0	0	0	2	0	0	0		8.4684e-06	0.999949		0	0	16
OTU_210	2	Root	Bacteria	Firmicutes	.	Clostridia	.	Clostridiales	.	Ruminococcaceae	.	Ercella	.	0.62	Ruminococcaceae_bacterium_ZWB_4_(HG003571)	92.9	1	0	0	0	0	1	0	0	0	1	0	0	0		8.4684e-06	0.999958		14	0	14
OTU_222	2	Root	Bacteria	Cloacimonetes	.	.	.	.	.	.	.	Candidatus Cloacamonas	.	0.99	Candidatus_Cloacimonas_acidaminovorans_str._Evry_(CU466930)	91.7	1	2	0	0	0	0	0	0	0	0	0	0	0		8.4684e-06	0.999966		0	0	0
OTU_200	2	Root	Bacteria	Firmicutes	.	Clostridia	.	Clostridiales	.	Lachnospiraceae	.	.	.	0.98	Clostridium_lavalense_(T)_CCRI-9842_(EF564277)	93.7	2	2	0	0	0	0	0	0	0	0	0	0	0		8.4684e-06	0.999975		21	12	17
OTU_203	2	Root	Bacteria	Firmicutes	.	Clostridia	.	Thermoanaerobacterales	.	Thermoanaerobacteraceae	.	.	.	0.51	uncultured_soil_bacterium_PBS-III-27_(AJ390456)	86.2	2	0	0	0	0	2	0	0	0	0	0	0	0		8.4684e-06	0.999983		17	40	17
OTU_198	2	Root	Bacteria	Proteobacteria	.	Gammaproteobacteria	.	Pseudomonadales	.	Moraxellaceae	.	Acinetobacter	.	1	Acinetobacter_indicus_(T)_A648_(HM047743)	100	1	0	0	0	0	0	0	0	0	2	0	0	0		8.4684e-06	0.999992		0	0	86
OTU_197	2	Root	Bacteria	Chloroflexi	.	Anaerolineae	.	Anaerolineales	.	Anaerolineaceae	.	.	.	1	Ornatilinea_apprima_P3M-1_(JQ292916)	90.9	1	0	0	0	0	1	0	0	0	1	0	0	0		8.4684e-06	1		8	23	100

## Sheet:  AESS-all noLineage
Combined OTU table from single run of all 12 sources.					42897	19600	7684	16895	46024	15848	3483	3502	34876	23056	10875	11432
	236172																				Coverage	Coverage	Coverage
OTU	Size	Species	Match%	Match#	W1 amplicon	W1 16S extended	W1 Spades contigs	W1 Spades 16S contigs	W2 amplicon	W2 16S extended	W2 Spades contigs	W2 Spades 16S contigs	W3 amplicon	W3 16S extended	W3 Spades contigs	W3 Spades 16S contigs		Overall %	Cumulative		WGS 16S W1	WGS 16S W2	WGS 16S W3
OTU_1	58184	Desulfuromonas_acetexigens_(T)_(U23140)	96.8	1	27333	13574	5292	8544	132	0	0	0	1554	1010	195	550		0.246363	0.246363		100	77	100
OTU_2	24970	Thermodesulfovibrio_aggregans_(T)_TGE-P1_(AB021302)	87	1	24	0	0	0	17120	7816	0	0	10	0	0	0		0.105728	0.352091		84	100	25
OTU_3	14236	Treponema_zuelzerae_(T)_type_strain:_DSM_1903;_2_(FR749929)	85.8	1	13	0	0	0	1171	305	122	229	5956	3069	1889	1482		0.0602781	0.412369		0	100	100
OTU_4	12568	Methanobacterium_subterraneum_(T)_A8p,_DSM_11074_(X99044)	100	1	5	0	0	0	29	0	0	0	7736	2393	1396	1009		0.0532155	0.465584		0	32	100
OTU_6	8872	Parabacteroides_distasonis_(T)_JCM_5825_(AB238922)	85.8	1	1270	271	193	140	9	0	0	0	3116	1598	1207	1068		0.0375658	0.50315		100	0	100
OTU_7	8470	Methanosaeta_harundinacea_(T)_8Ac_(AY817738)	97.2	1	1032	192	0	0	16	0	0	0	3332	1942	1044	912		0.0358637	0.539014		100	60	100
OTU_8	8389	Cytophaga_fermentans_(T)_ATCC_19072_(M58766)	87.7	1	9	0	0	0	5845	1220	766	542	7	0	0	0		0.0355207	0.574535		2	100	25
OTU_5	8105	Methanosarcina_siciliae_type_strain:_DSM3028_(FR733698)	100	7	1238	2733	1738	2109	11	0	0	0	54	222	0	0		0.0343182	0.608853		100	39	100
OTU_11	5998	Lysinibacillus_sp._LAM612_(KF443809)	88.5	2	3	0	0	0	7	0	0	0	533	4068	0	1387		0.0253967	0.63425		7	31	100
OTU_10	5619	candidate_division_OP1_clone_OPB14_(AF027045)	89.7	1	3	0	0	0	4057	771	424	358	6	0	0	0		0.023792	0.658042		6	100	57
OTU_9	5520	Thermacetogenium_phaeum_(T)_PB_(AB020336)	87	1	5	0	0	0	14	0	0	0	3285	2216	0	0		0.0233728	0.681414		13	14	100
OTU_12	4395	Sulfurospirillum_alkalitolerans_HTRB-L1_(GQ863490)	97.2	1	2340	508	0	1475	41	0	0	0	31	0	0	0		0.0186093	0.700024		100	2	0
OTU_13	4223	Syntrophaceticus_schinkii_(T)_Sp3_(EU386162)	90.5	1	6	0	0	0	2871	506	400	433	7	0	0	0		0.017881	0.717905		33	100	7
OTU_14	4165	Methanocalculus_pumilus_(T)_MHT-1_(AB008853)	99.6	1	3312	476	0	318	30	0	0	0	29	0	0	0		0.0176355	0.73554		100	25	18
OTU_16	3899	Methanobacterium_aarhusense_(T)_H2-LR_(AY386124)	99.6	1	1	0	0	0	3104	271	253	263	7	0	0	0		0.0165092	0.752049		5	100	46
OTU_15	3652	Desulfotomaculum_acetoxidans_(T)_DSM_771_(Y11566)	90.9	1	6	0	0	0	2463	1177	0	0	6	0	0	0		0.0154633	0.767513		17	100	43
OTU_19	3012	Methanothermobacter_thermoflexus_(T)_IDZ,_VKM_B-1963,_DSM_7268_(X99047)	100	7	1	0	0	0	2685	326	0	0	0	0	0	0		0.0127534	0.780266		5	100	10
OTU_24	2540	Natronincola_peptidivorans_(T)_Z-7031_(EF382661)	99.2	1	12	0	0	0	8	0	0	0	1293	754	0	473		0.0107549	0.791021		64	8	100
OTU_18	2287	*	0	1	2	0	0	0	955	556	482	292	0	0	0	0		0.00968362	0.800705		0	100	0
OTU_17	2245	Caldicoprobacter_guelmensis_(T)_D2C22_(JQ707908)	91.3	2	17	0	0	0	7	0	0	0	477	343	946	455		0.00950578	0.81021		97	46	100
OTU_29	2114	Methanobacterium_alcaliphilum_(T)_NBRC_105226_(AB496639)	100	2	2	0	0	0	1161	100	0	0	586	265	0	0		0.0089511	0.819161		40	100	100
OTU_20	2099	Clostridium_hungatei_(T)_AD;_ATCC_700212_(AF020429)	91.3	1	5	0	0	0	5	0	0	0	1124	965	0	0		0.00888759	0.828049		9	9	100
OTU_23	2005	Ignavibacterium_album_(T)_Mat9-16_(AB478415)	99.6	1	1	0	0	0	1089	408	236	262	9	0	0	0		0.00848958	0.836539		0	100	0
OTU_27	1974	Porphyromonas_pogonae_strain_MI_10-1288_(NR_136443.1)	86.2	2	1059	128	45	61	29	0	0	0	389	129	71	63		0.00835832	0.844897		100	2	100
OTU_21	1955	Pontibacter_sp._JC215_A10_(HG008901)	85.8	1	4	0	0	0	2	0	0	0	931	1018	0	0		0.00827787	0.853175		99	18	100
OTU_22	1941	Desulfovibrio_oxamicus_(T)_DSM_1925_(DQ122124)	100	1	19	10	0	0	2	0	0	0	860	624	426	0		0.00821859	0.861393		75	19	100
OTU_26	1857	Sporomusa_ovata_strain_DSM_2662_(NR_117659.1)	98	3	1	0	0	0	0	0	0	0	306	175	805	570		0.00786291	0.869256		9	21	100
OTU_28	1822	Acetobacterium_malicum_(T)_DSM_4132_(X96957)	100	3	929	304	37	161	16	0	0	0	153	155	67	0		0.00771472	0.876971		100	1	100
OTU_25	1536	Moorella_humiferrea_(T)_64_FGQ_(GQ872425)	88.9	2	1	0	0	0	129	847	559	0	0	0	0	0		0.00650373	0.883475		15	100	40
OTU_31	1351	Thiohalocapsa_marina_(T)_type_strain:_JA142_(AM491592)	89.7	1	304	98	50	894	0	0	0	0	5	0	0	0		0.00572041	0.889195		100	0	61
OTU_41	1322	Ornatilinea_apprima_P3M-1_(JQ292916)	89.7	1	796	254	154	113	3	0	0	0	2	0	0	0		0.00559762	0.894793		100	31	6
OTU_30	1295	Dethiobacter_alkaliphilus_(T)_AHT_1_(EF422412)	89.3	2	0	0	0	0	4	0	0	0	23	19	0	1249		0.00548329	0.900276		13	75	100
OTU_33	1244	Syntrophobacter_sulfatireducens_(T)_TB8106_(AY651787)	100	1	219	65	0	190	17	0	0	0	254	139	186	174		0.00526735	0.905543		100	100	100
OTU_36	1224	Thermodesulfovibrio_aggregans_(T)_TGE-P1_(AB021302)	96.4	1	2	0	0	0	722	440	59	0	1	0	0	0		0.00518266	0.910726		0	100	0
OTU_32	1182	Aminiphilus_circumscriptus_(T)_ILE-2_(AY642589)	95.6	1	0	0	0	0	0	0	0	0	0	4	1178	0		0.00500483	0.915731		75	13	100
OTU_34	1063	Clostridium_sufflavum_(T)_CDT-1_(AB267266)	97.2	3	13	14	0	997	0	0	0	0	27	12	0	0		0.00450096	0.920232		100	15	96
OTU_35	1005	Dielma_fastidiosa_strain_JC13_(NR_125593.1)	92.5	1	0	0	0	0	0	0	0	0	32	178	466	329		0.00425537	0.924487		0	0	100
OTU_39	973	Desulfovibrio_alkalitolerans_(T)_RT2_(AY649785)	99.2	1	108	23	8	129	4	0	0	0	429	23	135	114		0.00411988	0.928607		100	0	100
OTU_38	944	Magnetospira_thiophila_(T)_MMS-1_(EU861390)	90.1	1	6	0	0	8	5	0	0	0	290	285	202	148		0.00399709	0.932604		100	0	100
OTU_37	910	Desulfitibacter_alkalitolerans_(T)_sk.kt5_(AY538171)	92.1	1	0	0	0	0	1	0	0	0	13	6	241	649		0.00385312	0.936457		34	33	100
OTU_40	866	Pelotomaculum_propionicicum_(T)_MGP_(AB154390)	99.2	1	4	0	0	0	188	67	43	564	0	0	0	0		0.00366682	0.940124		7	100	8
OTU_49	774	Dethiobacter_alkaliphilus_(T)_AHT_1_(EF422412)	96	1	4	0	0	0	43	84	18	147	116	99	16	247		0.00327727	0.943401		9	54	100
OTU_42	749	Sunxiuqinia_faeciviva_(T)_JAM-BA0302_(AB362263)	91.7	1	53	13	15	53	111	82	53	62	119	188	0	0		0.00317142	0.946573		100	100	100
OTU_44	604	Aminiphilus_circumscriptus_(T)_ILE-2_(AY642589)	99.6	1	205	82	53	259	2	0	0	0	3	0	0	0		0.00255746	0.94913		100	16	100
OTU_43	601	Aminivibrio_pyruvatiphilus_4F6E_(AB623229)	91.7	1	128	62	6	403	2	0	0	0	0	0	0	0		0.00254476	0.951675		100	1	0
OTU_45	563	Smithella_propionica_(T)_LYP_(AF126282)	98	1	7	0	0	0	217	65	0	0	82	25	77	90		0.00238386	0.954059		44	100	100
OTU_50	472	*	0	1	0	0	0	0	259	211	0	0	2	0	0	0		0.00199854	0.956057		0	100	0
OTU_172	461	Pontibacter_niistensis_(T)_NII-0905_(FJ897494)	85.4	2	1	0	0	0	269	100	26	65	0	0	0	0		0.00195197	0.958009		21	86	21
OTU_46	447	Pseudomonas_songnenensis_strain_NEAU-ST5-5_(NR_148295.1)	100	2	6	0	0	0	1	0	0	0	138	126	102	74		0.00189269	0.959902		56	0	100
OTU_65	441	Smithella_propionica_(T)_LYP_(AF126282)	97.6	1	84	33	0	269	3	0	0	0	27	25	0	0		0.00186728	0.961769		100	46	79
OTU_48	425	Syntrophomonas_bryantii_type_strain:_DSM_3014_(HE654006)	96.8	1	53	21	0	12	4	0	0	0	61	69	0	205		0.00179954	0.963569		100	0	100
OTU_47	409	Methanospirillum_hungatei_strain_JF-1_(NR_074177.1)	98.4	2	67	135	0	206	0	0	0	0	1	0	0	0		0.00173179	0.965301		100	0	0
OTU_51	397	Dethiosulfatibacter_aminovorans_(T)_C/G2_(=_JCM_13356,_=_NBRC_101112,_=_DSM_17477)_(AB218661)	94.8	1	230	115	0	49	0	0	0	0	3	0	0	0		0.00168098	0.966982		100	9	14
OTU_52	316	uncultured_bacterium_KF-JG30-18_(AJ295656)	90.1	1	0	0	0	0	44	28	23	221	0	0	0	0		0.00133801	0.96832		2	100	1
OTU_67	315	Bellilinea_caldifistulae_(T)_GOMI-1_(AB243672)	98.8	1	2	0	0	0	93	48	0	20	51	50	23	28		0.00133377	0.969653		15	100	64
OTU_53	276	Clostridium_luticellarii_strain_FW431_(NR_145907.1)	98.4	1	0	0	0	0	0	0	0	0	53	63	60	100		0.00116864	0.970822		3	0	100
OTU_54	275	Ruminococcaceae_bacterium_ZWB_4_(HG003571)	96	1	169	47	31	25	2	0	0	0	1	0	0	0		0.00116441	0.971987		100	0	45
OTU_55	265	Desulfitobacterium_metallireducens_(T)_853-15A_(AF297871)	97.6	1	0	0	0	0	1	0	0	0	146	118	0	0		0.00112206	0.973109		14	21	100
OTU_57	257	Desulfitibacter_alkalitolerans_(T)_sk.kt5_(AY538171)	98.8	1	0	0	0	0	2	0	0	0	181	74	0	0		0.00108819	0.974197		16	12	100
OTU_58	242	Marivirga_sericea_(T)_IFO_15983_(AB078081)	87	3	125	58	9	41	8	0	0	0	1	0	0	0		0.00102468	0.975221		100	2	2
OTU_59	232	*	0	1	161	70	0	0	1	0	0	0	0	0	0	0		0.000982335	0.976204		100	0	25
OTU_56	230	Desulfomicrobium_salsuginis_strain_ADR21_(NR_132593.1)	98.8	2	25	8	0	193	0	0	0	0	4	0	0	0		0.000973867	0.977178		100	0	1
OTU_63	212	Olivibacter_sitiensis_(T)_AW-6_(DQ421387)	86.2	1	175	33	0	0	0	0	0	0	4	0	0	0		0.000897651	0.978075		100	0	8
OTU_60	201	Petrimonas_sulfuriphila_(T)_BN3_(AY570690)	100	1	104	16	16	65	0	0	0	0	0	0	0	0		0.000851075	0.978926		100	0	0
OTU_61	193	Thermanaerothrix_daxensis_strain_GNS-1_(NR_117865.1)	87.4	2	0	0	0	0	70	79	0	44	0	0	0	0		0.000817201	0.979744		0	100	0
OTU_195	192	Caldicoprobacter_algeriensis_TH7C1_(GU216701)	92.1	2	0	0	0	0	132	60	0	0	0	0	0	0		0.000812967	0.980557		34	91	34
OTU_64	184	Thermodesulfovibrio_yellowstonii_(T)_YP87_(AB231858)	100	1	0	0	0	0	107	77	0	0	0	0	0	0		0.000779093	0.981336		0	100	0
OTU_62	178	Spirochaeta_smaragdinae_(T)_SEBR_4228;_DSM_11293_(U80597)	88.1	1	4	0	0	0	0	0	0	0	61	53	29	31		0.000753688	0.982089		48	0	100
OTU_74	175	Syntrophorhabdus_aromaticivorans_(T)_UI_(AB212873)	97.2	1	25	3	0	0	47	19	0	0	25	56	0	0		0.000740985	0.98283		100	69	100
OTU_69	157	Clostridium_thermocellum_(T)_ATCC_27405_(CP000568)	92.5	5	0	0	0	0	2	0	0	0	106	49	0	0		0.00066477	0.983495		11	13	100
OTU_70	148	Ornatilinea_apprima_P3M-1_(JQ292916)	99.6	1	109	34	0	0	2	0	0	0	3	0	0	0		0.000626662	0.984122		100	17	22
OTU_68	134	Tepidanaerobacter_syntrophicus_(T)_JL_(AB106353)	95.7	1	0	0	0	0	0	0	0	0	32	40	62	0		0.000567383	0.984689		69	0	100
OTU_66	129	Paenibacillus_phyllosphaerae_(T)_PALXIL04_(AY598818)	88.5	1	0	0	0	129	0	0	0	0	0	0	0	0		0.000546212	0.985235		91	12	37
OTU_76	127	Azoarcus_olearius_DQS-4_(EF158388)	99.2	1	71	18	15	0	10	0	0	0	13	0	0	0		0.000537744	0.985773		100	0	4
OTU_72	125	Syntrophorhabdus_aromaticivorans_(T)_UI_(AB212873)	94.9	1	7	0	0	0	2	0	0	0	82	34	0	0		0.000529275	0.986302		99	18	100
OTU_75	118	Geoalkalibacter_ferrihydriticus_(T)_Z-0531_(DQ309326)	96.8	1	4	0	0	0	2	0	0	0	61	51	0	0		0.000499636	0.986802		10	25	100
OTU_212	114	Dethiobacter_alkaliphilus_(T)_AHT_1_(EF422412)	95.3	1	1	0	0	0	63	30	0	0	15	5	0	0		0.000482699	0.987285		9	93	92
OTU_71	111	Crocinitomix_catalasitica_(T)_IFO_15977_(AB078042)	88.1	4	38	37	6	28	2	0	0	0	0	0	0	0		0.000469996	0.987755		100	0	0
OTU_78	101	Dethiobacter_alkaliphilus_(T)_AHT_1_(EF422412)	91.7	1	0	0	0	0	58	41	0	0	2	0	0	0		0.000427654	0.988182		3	100	8
OTU_73	92	*	0	1	0	0	0	0	0	0	0	0	11	40	23	18		0.000389547	0.988572		25	0	100
OTU_79	92	Smithella_propionica_(T)_LYP_(AF126282)	92.5	2	59	32	0	0	1	0	0	0	0	0	0	0		0.000389547	0.988961		100	18	18
OTU_80	86	Desulfotomaculum_kuznetsovii_strain_17_(NR_115129.1)	89.7	2	0	0	0	0	50	35	0	0	1	0	0	0		0.000364141	0.989326		0	100	0
OTU_77	84	Leptolinea_tardivitalis_(T)_YMTK-2_(AB109438)	93.7	1	0	0	0	0	29	37	18	0	0	0	0	0		0.000355673	0.989681		0	100	0
OTU_85	83	Smithella_propionica_(T)_LYP_(AF126282)	95.3	1	54	24	0	0	3	0	0	0	2	0	0	0		0.000351439	0.990033		100	11	17
OTU_82	79	Atopobium_vaginae_(T)_CCUG_38953_(Y17195)	88.5	1	51	0	0	0	14	0	0	0	14	0	0	0		0.000334502	0.990367		47	31	23
OTU_81	78	*	0	1	43	35	0	0	0	0	0	0	0	0	0	0		0.000330268	0.990697		100	9	9
OTU_84	75	Ruminococcaceae_bacterium_ZWB_4_(HG003571)	100	1	4	0	0	0	1	0	0	0	46	24	0	0		0.000317565	0.991015		91	0	100
OTU_83	71	Longilinea_arvoryzae_(T)_KOME-1_(AB243673)	86.6	2	0	0	0	0	1	0	0	0	22	35	6	7		0.000300628	0.991316		0	21	100
OTU_201	65	Aminivibrio_pyruvatiphilus_4F6E_(AB623229)	91.7	1	60	5	0	0	0	0	0	0	0	0	0	0		0.000275223	0.991591		93	1	0
OTU_87	63	Desulfotomaculum_varum_RH04-3_(GU126374)	88.2	1	2	0	0	0	0	0	0	0	39	11	11	0		0.000266755	0.991858		23	0	100
OTU_90	61	Methanobacterium_formicicum_(T)_DSM_1535_(AF169245)	99.6	1	10	0	0	0	18	0	0	0	33	0	0	0		0.000258286	0.992116		0	14	100
OTU_86	60	Veillonella_magna_(T)_lac18_(EU096495)	89.3	1	5	0	0	0	0	0	0	0	28	27	0	0		0.000254052	0.99237		24	0	100
OTU_91	53	Sphingomonas_ginsenosidimutans_(T)_Gsoil_1429_(HM204925)	100	1	0	0	0	8	0	0	0	0	0	45	0	0		0.000224413	0.992594		100	0	100
OTU_89	52	Clostridium_putrificum_(T)_DSM_1734_(X73442)	92.1	1	23	23	0	0	4	0	0	0	2	0	0	0		0.000220179	0.992815		100	18	22
OTU_88	52	Acidobacteria_bacterium_P105_(KJ461654)	96	1	0	0	0	0	31	21	0	0	0	0	0	0		0.000220179	0.993035		0	100	0
OTU_100	47	Pedomicrobium_manganicum_(T)_ATCC_33121_(GU269549)	92.1	3	20	11	0	14	1	0	0	0	1	0	0	0		0.000199008	0.993234		100	0	0
OTU_103	45	Gracilibacter_thermotolerans_(T)_JW/YJL-S1_(DQ117465)	90.5	1	18	0	0	0	0	0	0	0	14	13	0	0		0.000190539	0.993424		100	31	97
OTU_106	44	Proteiniphilum_acetatigenes_(T)_TB107_(AY742226)	98	1	27	6	0	0	4	0	0	0	7	0	0	0		0.000186305	0.993611		100	0	0
OTU_98	42	Olegusella_massiliensis_strain_KHD7_(NR_146815.1)	89.7	1	0	0	0	0	20	21	0	0	1	0	0	0		0.000177836	0.993788		10	100	25
OTU_105	41	Clostridium_hungatei_(T)_AD;_ATCC_700212_(AF020429)	94.9	2	32	9	0	0	0	0	0	0	0	0	0	0		0.000173602	0.993962		100	7	29
OTU_94	41	Dethiobacter_alkaliphilus_(T)_AHT_1_(EF422412)	89.7	1	15	0	0	0	14	0	0	0	12	0	0	0		0.000173602	0.994136		4	4	22
OTU_92	38	Clostridium_thermopalmarium_(T)_(X72869)	98	1	0	0	0	0	0	0	0	0	17	21	0	0		0.0001609	0.994297		25	0	100
OTU_93	36	Methanolinea_mesophila_TNR_(AB447467)	96.5	1	0	0	0	0	0	0	0	0	6	19	11	0		0.000152431	0.994449		5	0	100
OTU_102	35	Lascolabacillus_massiliensis_strain_SIT8_(NR_144720.1)	97.2	1	29	0	0	0	2	0	0	0	4	0	0	0		0.000148197	0.994597		75	0	0
OTU_99	35	Pedobacter_sp._MIC2002_(JX978785)	87	1	13	0	0	0	18	0	0	0	4	0	0	0		0.000148197	0.994745		4	39	21
OTU_97	33	Thermincola_carboxydiphila_(T)_2204_(AY603000)	89.3	1	9	0	0	0	10	0	0	0	14	0	0	0		0.000139729	0.994885		39	15	16
OTU_101	33	Alkalibacter_saccharofermentans_(T)_Z-79820_(AY312403)	100	1	18	0	0	0	9	0	0	0	6	0	0	0		0.000139729	0.995025		29	9	13
OTU_113	31	Alkalitalea_saponilacus_(T)_SC/BZ-SP2_(HQ191474)	88.9	2	30	0	0	0	1	0	0	0	0	0	0	0		0.00013126	0.995156		97	0	0
OTU_95	28	Sphaerochaeta_globus_str._Buddy_(AF357916)	98.8	1	0	20	8	0	0	0	0	0	0	0	0	0		0.000118558	0.995275		100	0	0
OTU_96	28	Syntrophomonas_zehnderi_(T)_OL-4_(DQ898277)	94.5	1	0	0	0	0	2	0	0	0	2	24	0	0		0.000118558	0.995393		12	0	100
OTU_104	28	Methanobrevibacter_boviskoreani_JH1_(KC608769)	85.8	1	23	0	4	0	1	0	0	0	0	0	0	0		0.000118558	0.995512		100	0	0
OTU_108	27	Bacillaceae_bacterium_13CC_(JN571119)	90.9	1	10	0	0	0	10	0	0	0	7	0	0	0		0.000114323	0.995626		26	12	30
OTU_126	27	Pseudomonas_aestusnigri_CCUG_64165;_VGXO14_(HG004394)	98.4	1	18	0	0	0	4	0	0	0	5	0	0	0		0.000114323	0.99574		16	0	22
OTU_107	25	Vallitalea_pronyensis_FatNI3_(KC876639)	96	1	1	0	0	0	0	0	0	0	17	7	0	0		0.000105855	0.995846		26	22	100
OTU_112	25	Lutaonella_thermophila_(T)_CC-MHSW-2_(EU287913)	86.6	1	15	0	0	0	5	0	0	0	5	0	0	0		0.000105855	0.995952		35	1	3
OTU_124	25	Clostridium_acetireducens_(T)_30A_(X79862)	93.7	2	25	0	0	0	0	0	0	0	0	0	0	0		0.000105855	0.996058		100	15	27
OTU_147	24	Anaerobacterium_chartisolvens_T-1-35_(AB793710)	86.6	3	11	0	0	0	9	0	0	0	4	0	0	0		0.000101621	0.99616		66	0	0
OTU_110	24	Ornatilinea_apprima_P3M-1_(JQ292916)	93.7	1	0	0	0	0	2	0	0	0	8	14	0	0		0.000101621	0.996261		8	22	97
OTU_117	23	Spiribacter_salinus_M19-40_(CP005963)	92.9	2	14	0	0	0	5	0	0	0	4	0	0	0		9.73867e-05	0.996359		0	0	0
OTU_109	23	Pelotomaculum_thermopropionicum_(T)_SI_(AB035723)	88.5	1	0	0	0	0	0	0	0	0	16	7	0	0		9.73867e-05	0.996456		18	19	100
OTU_111	22	Gelria_glutamica_(T)_TGO_(AF321086)	87.4	1	8	0	0	0	4	0	0	0	10	0	0	0		9.31524e-05	0.996549		97	15	84
OTU_131	21	Pelospora_glutarica_(T)_WoGl3_(AJ251214)	96	1	6	0	0	0	1	0	0	0	11	3	0	0		8.89182e-05	0.996638		8	0	100
OTU_121	21	Syntrophomonas_zehnderi_(T)_OL-4_(DQ898277)	95.3	1	11	0	0	0	9	0	0	0	1	0	0	0		8.89182e-05	0.996727		100	25	10
OTU_114	20	Lactobacillus_gasseri_(T)_ATCC_33323_(AF519171)	100	4	0	0	0	0	13	0	0	0	7	0	0	0		8.4684e-05	0.996812		0	0	0
OTU_122	19	Streptomyces_aomiensis_(T)_M24DS04_(AB522686)	89.3	3	11	0	0	0	0	0	0	0	8	0	0	0		8.04498e-05	0.996892		100	0	100
OTU_123	18	Mariniphaga_sediminis_strain_SY21_(NR_137221.1)	91.3	1	16	0	0	0	1	0	0	0	1	0	0	0		7.62156e-05	0.996968		77	4	32
OTU_148	17	Cytophaga_xylanolytica_strain_DSM_6779_(NR_117112.1)	86.2	2	5	0	0	0	6	0	0	0	6	0	0	0		7.19814e-05	0.99704		21	0	4
OTU_133	16	Parvibaculum_lavamentivorans_(T)_DS-1_(AY387398)	100	1	5	0	0	0	7	0	0	0	4	0	0	0		6.77472e-05	0.997108		3	0	3
OTU_129	16	Natranaerovirga_pectinivora_(T)_AP3_(GQ922846)	94.9	1	5	0	0	0	6	0	0	0	5	0	0	0		6.77472e-05	0.997176		52	22	42
OTU_132	15	Melioribacter_roseus_P3M-2_(JQ292917)	95.7	1	6	0	0	0	5	0	0	0	4	0	0	0		6.3513e-05	0.997239		12	0	0
OTU_145	15	Sunxiuqinia_faeciviva_(T)_JAM-BA0302_(AB362263)	85.8	1	5	0	0	0	6	0	0	0	4	0	0	0		6.3513e-05	0.997303		0	0	0
OTU_115	14	Muribaculum_intestinale_strain_YL27_(NR_144616.1)	93.7	1	5	0	0	0	6	0	0	0	3	0	0	0		5.92788e-05	0.997362		2	1	3
OTU_153	14	Acholeplasma_parvum_(T)_H23M_(AY538170)	94.8	1	6	0	0	0	3	0	0	0	5	0	0	0		5.92788e-05	0.997421		0	0	0
OTU_116	14	Akkermansia_muciniphila_(T)_Muc_(AY271254)	100	1	14	0	0	0	0	0	0	0	0	0	0	0		5.92788e-05	0.997481		0	0	0
OTU_118	14	Treponema_caldarium_(T)_DSMZ7334_(EU580141)	96	1	8	0	3	2	0	0	0	0	1	0	0	0		5.92788e-05	0.99754		100	0	6
OTU_137	13	[Clostridium]_caenicola_strain_EBR596_(NR_126170.1)	94.9	1	1	0	0	0	0	0	0	0	11	1	0	0		5.50446e-05	0.997595		9	16	100
OTU_135	13	Gracilibacter_thermotolerans_(T)_JW/YJL-S1_(DQ117465)	90.1	1	1	0	0	0	3	0	0	0	9	0	0	0		5.50446e-05	0.99765		44	43	100
OTU_154	13	Thermovirga_lienii_(T)_Cas60314_(DQ071273)	91.7	1	1	0	0	0	7	0	0	0	5	0	0	0		5.50446e-05	0.997705		5	8	15
OTU_170	12	Methanobacterium_oryzae_(T)_FPi_(AF028690)	99.6	1	2	0	0	0	8	0	0	0	2	0	0	0		5.08104e-05	0.997756		0	5	10
OTU_120	12	Muribaculum_intestinale_strain_YL27_(NR_144616.1)	89.7	1	5	0	0	0	4	0	0	0	3	0	0	0		5.08104e-05	0.997807		0	0	0
OTU_119	12	Vallitalea_pronyensis_FatNI3_(KC876639)	88.5	1	0	0	0	0	0	0	0	0	0	12	0	0		5.08104e-05	0.997857		0	2	91
OTU_140	12	Paracoccus_aestuarii_(T)_B7_(EF660757)	99.2	7	5	0	0	0	4	0	0	0	3	0	0	0		5.08104e-05	0.997908		22	0	32
OTU_130	12	Desulfuribacillus_alkaliarsenatis_AHT28_(HM046584)	99.2	1	1	0	0	0	1	0	0	0	10	0	0	0		5.08104e-05	0.997959		85	8	100
OTU_128	12	Lactobacillus_faecis_AFL13-2_(AB812750)	100	4	0	0	0	0	7	0	0	0	5	0	0	0		5.08104e-05	0.99801		0	0	0
OTU_125	11	Culturomica_massiliensis_strain_Marseille-P2698_(NR_144745.1)	93.3	1	0	0	0	0	9	0	0	0	2	0	0	0		4.65762e-05	0.998057		2	1	2
OTU_127	11	Desulfosporosinus_orientis_(T)_DSM_765_(Y11570)	89.7	3	0	0	0	0	0	0	0	0	11	0	0	0		4.65762e-05	0.998103		16	13	100
OTU_146	11	Smithella_propionica_(T)_LYP_(AF126282)	94.5	1	9	0	0	0	1	0	0	0	1	0	0	0		4.65762e-05	0.99815		99	10	94
OTU_142	10	Bellilinea_caldifistulae_(T)_GOMI-1_(AB243672)	87.7	1	0	0	0	0	4	0	0	0	6	0	0	0		4.2342e-05	0.998192		0	87	67
OTU_144	10	Porphyromonas_pogonae_strain_MI_10-1288_(NR_136443.1)	86.2	1	5	0	0	0	0	0	0	0	5	0	0	0		4.2342e-05	0.998234		48	1	78
OTU_205	10	Natronoflexus_pectinivorans_AP1_(GQ922844)	88.1	2	3	0	0	0	2	0	0	0	5	0	0	0		4.2342e-05	0.998277		0	0	0
OTU_186	10	Desulfitobacterium_hafniense_(T)_DCB-2_(CP001336)	88.5	6	3	0	0	0	0	0	0	0	7	0	0	0		4.2342e-05	0.998319		57	8	100
OTU_141	10	Soehngenia_saccharolytica_(T)_BOR-Y_(AY353956)	96.8	1	4	0	0	0	2	0	0	0	4	0	0	0		4.2342e-05	0.998361		3	0	7
OTU_179	10	Caloramator_fervidus_(T)_RT4._B1_(L09187)	89.7	1	0	0	0	0	9	0	0	0	1	0	0	0		4.2342e-05	0.998404		15	100	40
OTU_150	10	Acholeplasma_parvum_(T)_H23M_(AY538170)	92.9	1	1	0	0	0	2	0	0	0	7	0	0	0		4.2342e-05	0.998446		0	0	0
OTU_167	9	Cytophaga_fermentans_(T)_ATCC_19072_(M58766)	88.9	1	0	0	0	0	5	0	0	0	4	0	0	0		3.81078e-05	0.998484		0	0	0
OTU_183	9	Desulfovibrio_psychrotolerans_(T)_type_strain:_PWC_=_JS1_(AM418397)	99.2	1	7	0	0	0	1	0	0	0	1	0	0	0		3.81078e-05	0.998522		72	0	0
OTU_177	9	Muribaculum_intestinale_strain_YL27_(NR_144616.1)	91.3	1	2	0	0	0	2	0	0	0	5	0	0	0		3.81078e-05	0.99856		3	1	3
OTU_164	9	Thermanaerovibrio_acidaminovorans_strain_DSM_6589_(NR_114455.1)	87	1	0	0	0	0	9	0	0	0	0	0	0	0		3.81078e-05	0.998598		15	74	44
OTU_159	9	*	0	1	3	0	0	0	4	0	0	0	2	0	0	0		3.81078e-05	0.998637		0	12	20
OTU_156	9	Moorella_glycerini_(T)_YS6_(U82327)	95.7	3	0	0	0	0	3	0	0	0	6	0	0	0		3.81078e-05	0.998675		11	73	100
OTU_138	9	Gracilibacter_thermotolerans_(T)_JW/YJL-S1_(DQ117465)	91.7	1	0	0	0	0	0	0	0	0	0	9	0	0		3.81078e-05	0.998713		75	33	100
OTU_152	9	Geovibrio_ferrireducens_(T)_PAL-1_(X95744)	99.2	1	3	0	0	0	5	0	0	0	1	0	0	0		3.81078e-05	0.998751		40	0	0
OTU_149	9	Anoxynatronum_sibiricum_(T)_Z-7981_(AF522323)	99.2	1	7	0	0	0	1	0	0	0	1	0	0	0		3.81078e-05	0.998789		76	9	34
OTU_139	8	Christensenella_minuta_YIT_12065_(AB490809)	93.3	1	8	0	0	0	0	0	0	0	0	0	0	0		3.38736e-05	0.998823		20	9	23
OTU_171	8	Muribaculum_intestinale_strain_YL27_(NR_144616.1)	93.7	1	2	0	0	0	3	0	0	0	3	0	0	0		3.38736e-05	0.998857		0	0	0
OTU_134	8	*	0	1	3	0	0	0	3	0	0	0	2	0	0	0		3.38736e-05	0.998891		11	1	0
OTU_157	8	Petrimonas_sulfuriphila_(T)_BN3_(AY570690)	95.3	1	7	0	0	0	0	0	0	0	1	0	0	0		3.38736e-05	0.998925		78	0	0
OTU_143	7	Methanobacterium_subterraneum_(T)_A8p,_DSM_11074_(X99044)	96.9	1	0	0	0	0	0	0	0	0	0	7	0	0		2.96394e-05	0.998954		0	29	100
OTU_220	7	Alkaliphilus_peptidifermentans_(T)_Z-7036_(EF382660)	98.8	1	4	0	0	0	1	0	0	0	2	0	0	0		2.96394e-05	0.998984		38	8	47
OTU_184	7	Smithella_propionica_(T)_LYP_(AF126282)	92.9	1	2	0	0	0	1	0	0	0	4	0	0	0		2.96394e-05	0.999013		3	4	4
OTU_221	7	Ornatilinea_apprima_P3M-1_(JQ292916)	89.3	1	3	0	0	0	3	0	0	0	1	0	0	0		2.96394e-05	0.999043		48	6	6
OTU_207	7	Dethiobacter_alkaliphilus_(T)_AHT_1_(EF422412)	96	1	0	0	0	0	3	0	0	0	4	0	0	0		2.96394e-05	0.999073		5	23	91
OTU_185	7	Acetanaerobacterium_elongatum_(T)_Z7_(AY487928)	91.7	1	2	0	0	0	1	0	0	0	4	0	0	0		2.96394e-05	0.999102		68	0	50
OTU_136	7	anaerobic_bacterium_MO-CFX1_(AB598277)	91.7	1	0	0	0	0	0	0	0	0	7	0	0	0		2.96394e-05	0.999132		8	7	100
OTU_155	7	Muribaculum_intestinale_strain_YL27_(NR_144616.1)	94.8	1	0	0	0	0	5	0	0	0	2	0	0	0		2.96394e-05	0.999162		2	1	3
OTU_158	7	Aminobacterium_colombiense_strain_DSM_12261_(NR_074624.1)	85.8	2	4	0	0	0	2	0	0	0	1	0	0	0		2.96394e-05	0.999191		0	7	0
OTU_151	7	*	0	1	1	0	0	0	5	0	0	0	1	0	0	0		2.96394e-05	0.999221		0	0	0
OTU_169	6	Thermoanaerobacter_thermocopriae_(T)_JT-3T_(L09167)	91.7	3	6	0	0	0	0	0	0	0	0	0	0	0		2.54052e-05	0.999246		28	9	44
OTU_160	6	Calditerricola_yamamurae_(T)_YMO722_(AB308475)	86.6	2	3	0	0	0	1	0	0	0	2	0	0	0		2.54052e-05	0.999272		0	0	0
OTU_165	6	Thermanaerothrix_daxensis_strain_GNS-1_(NR_117865.1)	85.4	1	2	0	0	0	4	0	0	0	0	0	0	0		2.54052e-05	0.999297		62	83	2
OTU_161	6	Desulfuromonas_thiophila_(T)_NZ27_(DSMZ_8987)_(Y11560)	96.4	2	5	0	0	0	1	0	0	0	0	0	0	0		2.54052e-05	0.999323		28	0	11
OTU_162	6	Citrobacter_sedlakii_(T)_CDC_4696-86_(AF025364)	100	4	4	0	0	0	1	0	0	0	1	0	0	0		2.54052e-05	0.999348		85	0	1
OTU_176	6	Sedimentibacter_saalensis_(T)_ZF2_(AJ404680)	99.6	1	1	0	0	0	3	0	0	0	2	0	0	0		2.54052e-05	0.999373		25	9	17
OTU_163	6	Alkaliphilus_crotonatoxidans_(T)_B11-2_(AF467248)	100	2	5	0	0	0	1	0	0	0	0	0	0	0		2.54052e-05	0.999399		30	22	44
OTU_192	6	Smithella_propionica_(T)_LYP_(AF126282)	97.2	1	5	0	0	0	1	0	0	0	0	0	0	0		2.54052e-05	0.999424		45	41	44
OTU_214	6	Thermotogales_bacterium_MesG1Ag4.2.16S.B_(HM003109)	98.4	1	3	0	0	0	3	0	0	0	0	0	0	0		2.54052e-05	0.99945		0	0	0
OTU_166	5	Defluviitalea_saccharophila_(T)_LIND6LT2_(HQ020487)	92.9	1	1	0	0	0	0	0	0	0	4	0	0	0		2.1171e-05	0.999471		42	17	62
OTU_219	5	Streptomyces_cinereorectus_(T)_NBRC_15395_(AB184646)	86.6	12	0	0	0	0	5	0	0	0	0	0	0	0		2.1171e-05	0.999492		0	98	9
OTU_206	5	Moorella_humiferrea_(T)_64_FGQ_(GQ872425)	92.9	1	4	0	0	0	0	0	0	0	1	0	0	0		2.1171e-05	0.999513		44	4	69
OTU_199	5	Methanofollis_tationis_(T)_DSM_2702_(AF095272)	99.6	2	3	0	0	0	1	0	0	0	1	0	0	0		2.1171e-05	0.999534		0	0	0
OTU_208	5	Levilinea_saccharolytica_(T)_KIBI-1_(AB109439)	95.3	1	0	0	0	0	4	0	0	0	1	0	0	0		2.1171e-05	0.999555		12	100	40
OTU_168	5	Anaerobranca_zavarzinii_(T)_JW/VK-KS5Y_(EF190921)	100	1	1	0	0	0	3	0	0	0	1	0	0	0		2.1171e-05	0.999577		16	1	22
OTU_188	5	Muribaculum_intestinale_strain_YL27_(NR_144616.1)	89.3	1	2	0	0	0	1	0	0	0	2	0	0	0		2.1171e-05	0.999598		0	0	0
OTU_180	4	Pleomorphomonas_diazotrophica_R5-392_(JQ346801)	100	2	1	0	0	0	3	0	0	0	0	0	0	0		1.69368e-05	0.999615		16	0	17
OTU_173	4	Mesorhizobium_camelthorni_(T)_CCNWXJ40-4_(EU169581)	99.6	1	2	0	0	0	2	0	0	0	0	0	0	0		1.69368e-05	0.999632		23	0	28
OTU_215	4	Lutispora_thermophila_(T)_EBR46_(AB186360)	89.3	2	3	0	0	0	1	0	0	0	0	0	0	0		1.69368e-05	0.999649		18	12	19
OTU_217	4	uncultured_candidate_division_BRC1_bacterium_LD1-PA21_(AY114315)	89.3	1	4	0	0	0	0	0	0	0	0	0	0	0		1.69368e-05	0.999665		64	0	0
OTU_218	4	Gelria_glutamica_(T)_TGO_(AF321086)	89.7	1	0	0	0	0	4	0	0	0	0	0	0	0		1.69368e-05	0.999682		18	83	18
OTU_187	4	Pseudobacteroides_cellulosolvens_(L35517)	95.7	3	0	0	0	0	0	0	0	0	4	0	0	0		1.69368e-05	0.999699		47	15	100
OTU_209	4	Cytophaga_xylanolytica_strain_DSM_6779_(NR_117112.1)	85.8	1	1	0	0	0	2	0	0	0	1	0	0	0		1.69368e-05	0.999716		13	2	2
OTU_175	4	Muribaculum_intestinale_strain_YL27_(NR_144616.1)	90.5	1	0	0	0	0	1	0	0	0	3	0	0	0		1.69368e-05	0.999733		2	7	2
OTU_182	4	Desulfotomaculum_acetoxidans_(T)_DSM_771_(Y11566)	90.9	1	1	0	0	0	2	0	0	0	1	0	0	0		1.69368e-05	0.99975		15	19	47
OTU_178	4	Smithella_propionica_(T)_LYP_(AF126282)	93.3	1	2	0	0	0	2	0	0	0	0	0	0	0		1.69368e-05	0.999767		0	0	0
OTU_196	3	Muribaculum_intestinale_strain_YL27_(NR_144616.1)	96.4	1	1	0	0	0	0	0	0	0	2	0	0	0		1.27026e-05	0.99978		0	0	0
OTU_181	3	*	0	1	0	0	1	0	0	0	1	0	0	0	1	0		1.27026e-05	0.999793		36	22	8
OTU_204	3	Clostridium_saccharolyticum_(T)_DSM_2544_(Y18185)	100	1	0	0	0	0	0	0	0	0	3	0	0	0		1.27026e-05	0.999805		22	13	81
OTU_193	3	Candidatus_Procabacter_acanthamoebae_(AF177427)	99.2	1	2	0	0	0	1	0	0	0	0	0	0	0		1.27026e-05	0.999818		0	0	0
OTU_191	3	*	0	1	3	0	0	0	0	0	0	0	0	0	0	0		1.27026e-05	0.999831		85	6	11
OTU_174	3	Muribaculum_intestinale_strain_YL27_(NR_144616.1)	91.7	1	2	0	0	0	0	0	0	0	1	0	0	0		1.27026e-05	0.999843		2	7	2
OTU_202	3	Methanoregula_formicica_(T)_SMSP_(AB479390)	99.6	1	3	0	0	0	0	0	0	0	0	0	0	0		1.27026e-05	0.999856		96	0	5
OTU_224	3	Gracilibacter_thermotolerans_(T)_JW/YJL-S1_(DQ117465)	90.5	1	0	0	0	0	2	0	0	0	1	0	0	0		1.27026e-05	0.999869		14	8	26
OTU_213	3	uncultured_bacterium_FW34_(AF523981)	94.5	1	3	0	0	0	0	0	0	0	0	0	0	0		1.27026e-05	0.999881		61	0	0
OTU_223	3	uncultured_bacterium_FW34_(AF523981)	96	1	3	0	0	0	0	0	0	0	0	0	0	0		1.27026e-05	0.999894		45	0	0
OTU_225	3	Muribaculum_intestinale_strain_YL27_(NR_144616.1)	93.7	1	0	0	0	0	1	0	0	0	2	0	0	0		1.27026e-05	0.999907		2	1	3
OTU_189	2	Dehalobacter_restrictus_(T)_PER-K23_(U84497)	95.6	1	2	0	0	0	0	0	0	0	0	0	0	0		8.4684e-06	0.999915		65	30	68
OTU_216	2	Bacteroides_acidifaciens_(T)_A40_(AB021164)	100	1	1	0	0	0	1	0	0	0	0	0	0	0		8.4684e-06	0.999924		15	0	0
OTU_194	2	Saccharofermentans_acetigenes_(T)_P6_(AY949857)	95.3	1	2	0	0	0	0	0	0	0	0	0	0	0		8.4684e-06	0.999932		11	0	11
OTU_190	2	Desulfurispora_thermophila_(T)_RA50E1_(AY548776)	90.9	1	0	0	0	0	2	0	0	0	0	0	0	0		8.4684e-06	0.999941		7	63	9
OTU_211	2	Hydrogenophaga_defluvii_(T)_type_strain:_BSB_9.5_(AJ585993)	98.8	3	0	0	0	0	0	0	0	0	2	0	0	0		8.4684e-06	0.999949		0	0	16
OTU_210	2	Ruminococcaceae_bacterium_ZWB_4_(HG003571)	92.9	1	0	0	0	0	1	0	0	0	1	0	0	0		8.4684e-06	0.999958		14	0	14
OTU_222	2	Candidatus_Cloacimonas_acidaminovorans_str._Evry_(CU466930)	91.7	1	2	0	0	0	0	0	0	0	0	0	0	0		8.4684e-06	0.999966		0	0	0
OTU_200	2	Clostridium_lavalense_(T)_CCRI-9842_(EF564277)	93.7	2	2	0	0	0	0	0	0	0	0	0	0	0		8.4684e-06	0.999975		21	12	17
OTU_203	2	uncultured_soil_bacterium_PBS-III-27_(AJ390456)	86.2	2	0	0	0	0	2	0	0	0	0	0	0	0		8.4684e-06	0.999983		17	40	17
OTU_198	2	Acinetobacter_indicus_(T)_A648_(HM047743)	100	1	0	0	0	0	0	0	0	0	2	0	0	0		8.4684e-06	0.999992		0	0	86
OTU_197	2	Ornatilinea_apprima_P3M-1_(JQ292916)	90.9	1	0	0	0	0	1	0	0	0	1	0	0	0		8.4684e-06	1		8	23	100

## Sheet: AESS-all Pct
Combined OTU table from single run of all 12 sources.																		42897	19600	7684	16895	46024	15848	3483	3502	34876	23056	10875	11432
OTU	Size	RDP classification												Conf.	Species	Match%	Match#	W1 amplicon	W1 16S extended	W1 Spades contigs	W1 Spades 16S contigs	W2 amplicon	W2 16S extended	W2 Spades contigs	W2 Spades 16S contigs	W3 amplicon	W3 16S extended	W3 Spades contigs	W3 Spades 16S contigs
OTU_1	58184	Root	Bacteria	Proteobacteria	.	Deltaproteobacteria	.	Desulfuromonadales	.	Desulfuromonadaceae	.	Desulfuromonas	.	0.91	Desulfuromonas_acetexigens_(T)_(U23140)	96.8	1	0.637177	0.692551	0.688704	0.505712	0.00286807	0	0	0	0.0445579	0.0438064	0.017931	0.0481106
OTU_2	24970	Root	Bacteria	.	.	.	.	.	.	.	.	.	.	0.99	Thermodesulfovibrio_aggregans_(T)_TGE-P1_(AB021302)	87	1	0.00055948	0	0	0	0.37198	0.493185	0	0	0.00028673	0	0	0
OTU_3	14236	Root	Bacteria	Spirochaetes	.	Spirochaetia	.	Spirochaetales	.	Spirochaetaceae	.	.	.	0.57	Treponema_zuelzerae_(T)_type_strain:_DSM_1903;_2_(FR749929)	85.8	1	0.000303051	0	0	0	0.0254432	0.0192453	0.0350273	0.0653912	0.170776	0.133111	0.173701	0.129636
OTU_4	12568	Root	Archaea	Euryarchaeota	.	Methanobacteria	.	Methanobacteriales	.	Methanobacteriaceae	.	Methanobacterium	.	1	Methanobacterium_subterraneum_(T)_A8p,_DSM_11074_(X99044)	100	1	0.000116558	0	0	0	0.000630106	0	0	0	0.221814	0.103791	0.128368	0.088261
OTU_6	8872	Root	Bacteria	Bacteroidetes	.	Bacteroidia	.	Bacteroidales	.	Porphyromonadaceae	.	.	.	0.67	Parabacteroides_distasonis_(T)_JCM_5825_(AB238922)	85.8	1	0.0296058	0.0138265	0.0251171	0.00828648	0.00019555	0	0	0	0.0893451	0.0693095	0.110989	0.093422
OTU_7	8470	Root	Archaea	Euryarchaeota	.	Methanomicrobia	.	Methanosarcinales	.	Methanotrichaceae	.	Methanothrix	.	1	Methanosaeta_harundinacea_(T)_8Ac_(AY817738)	97.2	1	0.0240576	0.00979592	0	0	0.000347645	0	0	0	0.0955385	0.0842297	0.096	0.0797761
OTU_8	8389	Root	Bacteria	Bacteroidetes	.	.	.	.	.	.	.	.	.	0.99	Cytophaga_fermentans_(T)_ATCC_19072_(M58766)	87.7	1	0.000209805	0	0	0	0.126999	0.0769813	0.219925	0.154769	0.000200711	0	0	0
OTU_5	8105	Root	Archaea	Euryarchaeota	.	Methanomicrobia	.	Methanosarcinales	.	Methanosarcinaceae	.	Methanosarcina	.	1	Methanosarcina_siciliae_type_strain:_DSM3028_(FR733698)	100	7	0.0288598	0.139439	0.226184	0.12483	0.000239006	0	0	0	0.00154834	0.00962873	0	0
OTU_11	5998	Root	Bacteria	Firmicutes	.	Negativicutes	.	Selenomonadales	.	Veillonellaceae	.	.	.	0.53	Lysinibacillus_sp._LAM612_(KF443809)	88.5	2	6.9935e-05	0	0	0	0.000152095	0	0	0	0.0152827	0.17644	0	0.121326
OTU_10	5619	Root	Bacteria	.	.	.	.	.	.	.	.	.	.	1	candidate_division_OP1_clone_OPB14_(AF027045)	89.7	1	6.9935e-05	0	0	0	0.0881497	0.0486497	0.121734	0.102227	0.000172038	0	0	0
OTU_9	5520	Root	Bacteria	Firmicutes	.	Clostridia	.	.	.	.	.	.	.	0.58	Thermacetogenium_phaeum_(T)_PB_(AB020336)	87	1	0.000116558	0	0	0	0.000304189	0	0	0	0.0941908	0.0961138	0	0
OTU_12	4395	Root	Bacteria	Proteobacteria	.	Epsilonproteobacteria	.	Campylobacterales	.	Campylobacteraceae	.	Sulfurospirillum	.	0.62	Sulfurospirillum_alkalitolerans_HTRB-L1_(GQ863490)	97.2	1	0.0545493	0.0259184	0	0.0873039	0.00089084	0	0	0	0.000888863	0	0	0
OTU_13	4223	Root	Bacteria	Firmicutes	.	Clostridia	.	Thermoanaerobacterales	.	Thermoanaerobacteraceae	.	.	.	0.64	Syntrophaceticus_schinkii_(T)_Sp3_(EU386162)	90.5	1	0.00013987	0	0	0	0.0623805	0.0319283	0.114844	0.123644	0.000200711	0	0	0
OTU_14	4165	Root	Archaea	Euryarchaeota	.	Methanomicrobia	.	Methanomicrobiales	.	Methanomicrobiales_incertae_sedis	.	Methanocalculus	.	1	Methanocalculus_pumilus_(T)_MHT-1_(AB008853)	99.6	1	0.0772082	0.0242857	0	0.0188221	0.000651834	0	0	0	0.000831517	0	0	0
OTU_16	3899	Root	Archaea	Euryarchaeota	.	Methanobacteria	.	Methanobacteriales	.	Methanobacteriaceae	.	Methanobacterium	.	1	Methanobacterium_aarhusense_(T)_H2-LR_(AY386124)	99.6	1	2.33117e-05	0	0	0	0.0674431	0.0170999	0.0726385	0.0750999	0.000200711	0	0	0
OTU_15	3652	Root	Bacteria	Firmicutes	.	Clostridia	.	Clostridiales	.	.	.	.	.	0.89	Desulfotomaculum_acetoxidans_(T)_DSM_771_(Y11566)	90.9	1	0.00013987	0	0	0	0.0535156	0.074268	0	0	0.000172038	0	0	0
OTU_19	3012	Root	Archaea	Euryarchaeota	.	Methanobacteria	.	Methanobacteriales	.	Methanobacteriaceae	.	Methanothermobacter	.	1	Methanothermobacter_thermoflexus_(T)_IDZ,_VKM_B-1963,_DSM_7268_(X99047)	100	7	2.33117e-05	0	0	0	0.0583391	0.0205704	0	0	0	0	0	0
OTU_24	2540	Root	Bacteria	Firmicutes	.	Clostridia	.	Clostridiales	.	Clostridiaceae 2	.	Natronincola	.	0.87	Natronincola_peptidivorans_(T)_Z-7031_(EF382661)	99.2	1	0.00027974	0	0	0	0.000173822	0	0	0	0.0370742	0.032703	0	0.0413751
OTU_18	2287	Root	Bacteria	.	.	.	.	.	.	.	.	.	.	0.95	*	0	1	4.66233e-05	0	0	0	0.02075	0.0350833	0.138386	0.0833809	0	0	0	0
OTU_17	2245	Root	Bacteria	Firmicutes	.	Clostridia	.	Clostridiales	.	.	.	.	.	0.81	Caldicoprobacter_guelmensis_(T)_D2C22_(JQ707908)	91.3	2	0.000396298	0	0	0	0.000152095	0	0	0	0.013677	0.0148768	0.0869885	0.0398006
OTU_29	2114	Root	Archaea	Euryarchaeota	.	Methanobacteria	.	Methanobacteriales	.	Methanobacteriaceae	.	Methanobacterium	.	0.9	Methanobacterium_alcaliphilum_(T)_NBRC_105226_(AB496639)	100	2	4.66233e-05	0	0	0	0.025226	0.00630994	0	0	0.0168024	0.0114938	0	0
OTU_20	2099	Root	Bacteria	Firmicutes	.	Clostridia	.	Clostridiales	.	.	.	.	.	0.85	Clostridium_hungatei_(T)_AD;_ATCC_700212_(AF020429)	91.3	1	0.000116558	0	0	0	0.000108639	0	0	0	0.0322285	0.0418546	0	0
OTU_23	2005	Root	Bacteria	Ignavibacteriae	.	Ignavibacteria	.	Ignavibacteriales	.	Ignavibacteriaceae	.	Ignavibacterium	.	1	Ignavibacterium_album_(T)_Mat9-16_(AB478415)	99.6	1	2.33117e-05	0	0	0	0.0236616	0.0257446	0.0677577	0.0748144	0.000258057	0	0	0
OTU_27	1974	Root	Bacteria	Bacteroidetes	.	Bacteroidia	.	Bacteroidales	.	.	.	.	.	0.61	Porphyromonas_pogonae_strain_MI_10-1288_(NR_136443.1)	86.2	2	0.024687	0.00653061	0.00585632	0.00361054	0.000630106	0	0	0	0.0111538	0.00559507	0.00652874	0.00551085
OTU_21	1955	Root	Bacteria	Bacteroidetes	.	Bacteroidia	.	Bacteroidales	.	Porphyromonadaceae	.	.	.	0.5	Pontibacter_sp._JC215_A10_(HG008901)	85.8	1	9.32466e-05	0	0	0	4.34556e-05	0	0	0	0.0266946	0.0441534	0	0
OTU_22	1941	Root	Bacteria	Proteobacteria	.	Deltaproteobacteria	.	Desulfovibrionales	.	Desulfovibrionaceae	.	Desulfovibrio	.	1	Desulfovibrio_oxamicus_(T)_DSM_1925_(DQ122124)	100	1	0.000442921	0.000510204	0	0	4.34556e-05	0	0	0	0.0246588	0.0270645	0.0391724	0
OTU_26	1857	Root	Bacteria	Firmicutes	.	Negativicutes	.	Selenomonadales	.	Veillonellaceae	.	Sporomusa	.	0.96	Sporomusa_ovata_strain_DSM_2662_(NR_117659.1)	98	3	2.33117e-05	0	0	0	0	0	0	0	0.00877394	0.00759022	0.074023	0.04986
OTU_28	1822	Root	Bacteria	Firmicutes	.	Clostridia	.	Clostridiales	.	Eubacteriaceae	.	Acetobacterium	.	1	Acetobacterium_malicum_(T)_DSM_4132_(X96957)	100	3	0.0216565	0.0155102	0.0048152	0.00952945	0.000347645	0	0	0	0.00438697	0.00672276	0.00616092	0
OTU_25	1536	Root	Bacteria	Firmicutes	.	Clostridia	.	.	.	.	.	.	.	0.84	Moorella_humiferrea_(T)_64_FGQ_(GQ872425)	88.9	2	2.33117e-05	0	0	0	0.00280289	0.0534452	0.160494	0	0	0	0	0
OTU_31	1351	Root	Bacteria	Proteobacteria	.	Deltaproteobacteria	.	.	.	.	.	.	.	0.5	Thiohalocapsa_marina_(T)_type_strain:_JA142_(AM491592)	89.7	1	0.00708674	0.005	0.00650703	0.0529151	0	0	0	0	0.000143365	0	0	0
OTU_41	1322	Root	Bacteria	Chloroflexi	.	Anaerolineae	.	Anaerolineales	.	Anaerolineaceae	.	Ornatilinea	.	0.94	Ornatilinea_apprima_P3M-1_(JQ292916)	89.7	1	0.0185561	0.0129592	0.0200416	0.00668837	6.51834e-05	0	0	0	5.7346e-05	0	0	0
OTU_30	1295	Root	Bacteria	Firmicutes	.	Clostridia	.	.	.	.	.	.	.	0.84	Dethiobacter_alkaliphilus_(T)_AHT_1_(EF422412)	89.3	2	0	0	0	0	8.69112e-05	0	0	0	0.000659479	0.00082408	0	0.109255
OTU_33	1244	Root	Bacteria	Proteobacteria	.	Deltaproteobacteria	.	Syntrophobacterales	.	Syntrophobacteraceae	.	Syntrophobacter	.	1	Syntrophobacter_sulfatireducens_(T)_TB8106_(AY651787)	100	1	0.00510525	0.00331633	0	0.0112459	0.000369373	0	0	0	0.00728295	0.0060288	0.0171034	0.0152204
OTU_36	1224	Root	Bacteria	Nitrospirae	.	Nitrospira	.	Nitrospirales	.	Nitrospiraceae	.	Thermodesulfovibrio	.	1	Thermodesulfovibrio_aggregans_(T)_TGE-P1_(AB021302)	96.4	1	4.66233e-05	0	0	0	0.0156875	0.0277638	0.0169394	0	2.8673e-05	0	0	0
OTU_32	1182	Root	Bacteria	Synergistetes	.	Synergistia	.	Synergistales	.	Synergistaceae	.	Aminiphilus	.	1	Aminiphilus_circumscriptus_(T)_ILE-2_(AY642589)	95.6	1	0	0	0	0	0	0	0	0	0	0.000173491	0.108322	0
OTU_34	1063	Root	Bacteria	Firmicutes	.	Clostridia	.	Clostridiales	.	Ruminococcaceae	.	Clostridium III	.	0.95	Clostridium_sufflavum_(T)_CDT-1_(AB267266)	97.2	3	0.000303051	0.000714286	0	0.0590115	0	0	0	0	0.000774171	0.000520472	0	0
OTU_35	1005	Root	Bacteria	Bacteroidetes	.	Bacteroidia	.	Bacteroidales	.	Bacteroidaceae	.	Anaerorhabdus	.	0.6	Dielma_fastidiosa_strain_JC13_(NR_125593.1)	92.5	1	0	0	0	0	0	0	0	0	0.000917536	0.00772033	0.0428506	0.0287789
OTU_39	973	Root	Bacteria	Proteobacteria	.	Deltaproteobacteria	.	Desulfovibrionales	.	Desulfovibrionaceae	.	Desulfovibrio	.	1	Desulfovibrio_alkalitolerans_(T)_RT2_(AY649785)	99.2	1	0.00251766	0.00117347	0.00104112	0.0076354	8.69112e-05	0	0	0	0.0123007	0.000997571	0.0124138	0.00997201
OTU_38	944	Root	Bacteria	Proteobacteria	.	Alphaproteobacteria	.	Rhodospirillales	.	Rhodospirillaceae	.	.	.	0.67	Magnetospira_thiophila_(T)_MMS-1_(EU861390)	90.1	1	0.00013987	0	0	0.000473513	0.000108639	0	0	0	0.00831517	0.0123612	0.0185747	0.0129461
OTU_37	910	Root	Bacteria	Firmicutes	.	Clostridia	.	Clostridiales	.	Peptococcaceae 1	.	Desulfitibacter	.	0.61	Desulfitibacter_alkalitolerans_(T)_sk.kt5_(AY538171)	92.1	1	0	0	0	0	2.17278e-05	0	0	0	0.000372749	0.000260236	0.0221609	0.0567705
OTU_40	866	Root	Bacteria	Firmicutes	.	Clostridia	.	Clostridiales	.	Peptococcaceae 2	.	Pelotomaculum	.	0.95	Pelotomaculum_propionicicum_(T)_MGP_(AB154390)	99.2	1	9.32466e-05	0	0	0	0.00408483	0.00422766	0.0123457	0.161051	0	0	0	0
OTU_49	774	Root	Bacteria	Firmicutes	.	Clostridia	.	Natranaerobiales	.	Natranaerobiaceae	.	Dethiobacter	.	0.95	Dethiobacter_alkaliphilus_(T)_AHT_1_(EF422412)	96	1	9.32466e-05	0	0	0	0.000934295	0.00530035	0.00516796	0.041976	0.00332607	0.00429389	0.00147126	0.021606
OTU_42	749	Root	Bacteria	Bacteroidetes	.	Bacteroidia	.	Bacteroidales	.	Prolixibacteraceae	.	.	.	0.87	Sunxiuqinia_faeciviva_(T)_JAM-BA0302_(AB362263)	91.7	1	0.00123552	0.000663265	0.00195211	0.00313702	0.00241179	0.00517415	0.0152168	0.0177042	0.00341209	0.00815406	0	0
OTU_44	604	Root	Bacteria	Synergistetes	.	Synergistia	.	Synergistales	.	Synergistaceae	.	Aminiphilus	.	1	Aminiphilus_circumscriptus_(T)_ILE-2_(AY642589)	99.6	1	0.00477889	0.00418367	0.00689745	0.01533	4.34556e-05	0	0	0	8.6019e-05	0	0	0
OTU_43	601	Root	Bacteria	Synergistetes	.	Synergistia	.	Synergistales	.	Synergistaceae	.	Aminivibrio	.	0.68	Aminivibrio_pyruvatiphilus_4F6E_(AB623229)	91.7	1	0.00298389	0.00316327	0.000780843	0.0238532	4.34556e-05	0	0	0	0	0	0	0
OTU_45	563	Root	Bacteria	Proteobacteria	.	Deltaproteobacteria	.	Syntrophobacterales	.	Syntrophaceae	.	Smithella	.	0.97	Smithella_propionica_(T)_LYP_(AF126282)	98	1	0.000163182	0	0	0	0.00471493	0.00410146	0	0	0.00235119	0.00108432	0.00708046	0.00787264
OTU_50	472	Root	Bacteria	.	.	.	.	.	.	.	.	.	.	0.92	*	0	1	0	0	0	0	0.0056275	0.013314	0	0	5.7346e-05	0	0	0
OTU_172	461	Root	Bacteria	Bacteroidetes	.	Bacteroidia	.	Bacteroidales	.	.	.	.	.	0.58	Pontibacter_niistensis_(T)_NII-0905_(FJ897494)	85.4	2	2.33117e-05	0	0	0	0.00584478	0.00630994	0.00746483	0.0185608	0	0	0	0
OTU_46	447	Root	Bacteria	Proteobacteria	.	Gammaproteobacteria	.	Pseudomonadales	.	Pseudomonadaceae	.	Pseudomonas	.	0.99	Pseudomonas_songnenensis_strain_NEAU-ST5-5_(NR_148295.1)	100	2	0.00013987	0	0	0	2.17278e-05	0	0	0	0.00395688	0.00546495	0.00937931	0.00647306
OTU_65	441	Root	Bacteria	Proteobacteria	.	Deltaproteobacteria	.	Syntrophobacterales	.	Syntrophaceae	.	Smithella	.	0.77	Smithella_propionica_(T)_LYP_(AF126282)	97.6	1	0.00195818	0.00168367	0	0.0159219	6.51834e-05	0	0	0	0.000774171	0.00108432	0	0
OTU_48	425	Root	Bacteria	Firmicutes	.	Clostridia	.	Clostridiales	.	Syntrophomonadaceae	.	Syntrophomonas	.	1	Syntrophomonas_bryantii_type_strain:_DSM_3014_(HE654006)	96.8	1	0.00123552	0.00107143	0	0.000710269	8.69112e-05	0	0	0	0.00174905	0.00299271	0	0.0179321
OTU_47	409	Root	Archaea	Euryarchaeota	.	Methanomicrobia	.	Methanomicrobiales	.	Methanospirillaceae	.	Methanospirillum	.	1	Methanospirillum_hungatei_strain_JF-1_(NR_074177.1)	98.4	2	0.00156188	0.00688776	0	0.012193	0	0	0	0	2.8673e-05	0	0	0
OTU_51	397	Root	Bacteria	Firmicutes	.	Clostridia	.	Clostridiales	.	Clostridiales_Incertae Sedis XI	.	.	.	0.77	Dethiosulfatibacter_aminovorans_(T)_C/G2_(=_JCM_13356,_=_NBRC_101112,_=_DSM_17477)_(AB218661)	94.8	1	0.00536168	0.00586735	0	0.00290027	0	0	0	0	8.6019e-05	0	0	0
OTU_52	316	Root	Bacteria	.	.	.	.	.	.	.	.	.	.	1	uncultured_bacterium_KF-JG30-18_(AJ295656)	90.1	1	0	0	0	0	0.000956023	0.00176678	0.0066035	0.0631068	0	0	0	0
OTU_67	315	Root	Bacteria	Chloroflexi	.	Anaerolineae	.	Anaerolineales	.	Anaerolineaceae	.	Bellilinea	.	1	Bellilinea_caldifistulae_(T)_GOMI-1_(AB243672)	98.8	1	4.66233e-05	0	0	0	0.00202068	0.00302877	0	0.00571102	0.00146232	0.00216863	0.00211494	0.00244927
OTU_53	276	Root	Bacteria	Firmicutes	.	Clostridia	.	Clostridiales	.	Clostridiaceae 1	.	Clostridium sensu stricto	.	1	Clostridium_luticellarii_strain_FW431_(NR_145907.1)	98.4	1	0	0	0	0	0	0	0	0	0.00151967	0.00273248	0.00551724	0.00874738
OTU_54	275	Root	Bacteria	Firmicutes	.	Clostridia	.	Clostridiales	.	Ruminococcaceae	.	Ercella	.	0.84	Ruminococcaceae_bacterium_ZWB_4_(HG003571)	96	1	0.00393967	0.00239796	0.00403436	0.00147973	4.34556e-05	0	0	0	2.8673e-05	0	0	0
OTU_55	265	Root	Bacteria	Firmicutes	.	Clostridia	.	Clostridiales	.	Peptococcaceae 1	.	Desulfitobacterium	.	0.9	Desulfitobacterium_metallireducens_(T)_853-15A_(AF297871)	97.6	1	0	0	0	0	2.17278e-05	0	0	0	0.00418626	0.00511797	0	0
OTU_57	257	Root	Bacteria	Firmicutes	.	Clostridia	.	Clostridiales	.	Peptococcaceae 1	.	Desulfitibacter	.	1	Desulfitibacter_alkalitolerans_(T)_sk.kt5_(AY538171)	98.8	1	0	0	0	0	4.34556e-05	0	0	0	0.00518982	0.00320958	0	0
OTU_58	242	Root	Bacteria	Bacteroidetes	.	.	.	.	.	.	.	.	.	1	Marivirga_sericea_(T)_IFO_15983_(AB078081)	87	3	0.00291396	0.00295918	0.00117126	0.00242675	0.000173822	0	0	0	2.8673e-05	0	0	0
OTU_59	232	Root	Bacteria	.	.	.	.	.	.	.	.	.	.	0.94	*	0	1	0.00375318	0.00357143	0	0	2.17278e-05	0	0	0	0	0	0	0
OTU_56	230	Root	Bacteria	Proteobacteria	.	Deltaproteobacteria	.	Desulfovibrionales	.	Desulfomicrobiaceae	.	Desulfomicrobium	.	1	Desulfomicrobium_salsuginis_strain_ADR21_(NR_132593.1)	98.8	2	0.000582791	0.000408163	0	0.0114235	0	0	0	0	0.000114692	0	0	0
OTU_63	212	Root	Bacteria	Bacteroidetes	.	Bacteroidia	.	Bacteroidales	.	Porphyromonadaceae	.	Acetobacteroides	.	0.54	Olivibacter_sitiensis_(T)_AW-6_(DQ421387)	86.2	1	0.00407954	0.00168367	0	0	0	0	0	0	0.000114692	0	0	0
OTU_60	201	Root	Bacteria	Bacteroidetes	.	Bacteroidia	.	Bacteroidales	.	Porphyromonadaceae	.	Petrimonas	.	1	Petrimonas_sulfuriphila_(T)_BN3_(AY570690)	100	1	0.00242441	0.000816327	0.00208225	0.00384729	0	0	0	0	0	0	0	0
OTU_61	193	Root	Bacteria	Chloroflexi	.	Anaerolineae	.	Anaerolineales	.	Anaerolineaceae	.	.	.	0.69	Thermanaerothrix_daxensis_strain_GNS-1_(NR_117865.1)	87.4	2	0	0	0	0	0.00152095	0.00498486	0	0.0125642	0	0	0	0
OTU_195	192	Root	Bacteria	Firmicutes	.	Clostridia	.	Clostridiales	.	.	.	.	.	0.7	Caldicoprobacter_algeriensis_TH7C1_(GU216701)	92.1	2	0	0	0	0	0.00286807	0.00378597	0	0	0	0	0	0
OTU_64	184	Root	Bacteria	Nitrospirae	.	Nitrospira	.	Nitrospirales	.	Nitrospiraceae	.	Thermodesulfovibrio	.	1	Thermodesulfovibrio_yellowstonii_(T)_YP87_(AB231858)	100	1	0	0	0	0	0.00232487	0.00485866	0	0	0	0	0	0
OTU_62	178	Root	Bacteria	Spirochaetes	.	Spirochaetia	.	Spirochaetales	.	Spirochaetaceae	.	Spirochaeta	.	0.51	Spirochaeta_smaragdinae_(T)_SEBR_4228;_DSM_11293_(U80597)	88.1	1	9.32466e-05	0	0	0	0	0	0	0	0.00174905	0.00229875	0.00266667	0.00271169
OTU_74	175	Root	Bacteria	Proteobacteria	.	Deltaproteobacteria	.	.	.	Syntrophorhabdaceae	.	Syntrophorhabdus	.	1	Syntrophorhabdus_aromaticivorans_(T)_UI_(AB212873)	97.2	1	0.000582791	0.000153061	0	0	0.00102121	0.00119889	0	0	0.000716825	0.00242887	0	0
OTU_69	157	Root	Bacteria	Firmicutes	.	.	.	.	.	.	.	.	.	0.96	Clostridium_thermocellum_(T)_ATCC_27405_(CP000568)	92.5	5	0	0	0	0	4.34556e-05	0	0	0	0.00303934	0.00212526	0	0
OTU_70	148	Root	Bacteria	Chloroflexi	.	Anaerolineae	.	Anaerolineales	.	Anaerolineaceae	.	Ornatilinea	.	1	Ornatilinea_apprima_P3M-1_(JQ292916)	99.6	1	0.00254097	0.00173469	0	0	4.34556e-05	0	0	0	8.6019e-05	0	0	0
OTU_68	134	Root	Bacteria	Firmicutes	.	Clostridia	.	Clostridiales	.	Clostridiales_Incertae Sedis III	.	Tepidanaerobacter	.	0.99	Tepidanaerobacter_syntrophicus_(T)_JL_(AB106353)	95.7	1	0	0	0	0	0	0	0	0	0.000917536	0.00173491	0.00570115	0
OTU_66	129	Root	Bacteria	Firmicutes	.	Clostridia	.	Clostridiales	.	.	.	.	.	0.69	Paenibacillus_phyllosphaerae_(T)_PALXIL04_(AY598818)	88.5	1	0	0	0	0.0076354	0	0	0	0	0	0	0	0
OTU_76	127	Root	Bacteria	Proteobacteria	.	Betaproteobacteria	.	Rhodocyclales	.	Rhodocyclaceae	.	Thauera	.	0.98	Azoarcus_olearius_DQS-4_(EF158388)	99.2	1	0.00165513	0.000918367	0.00195211	0	0.000217278	0	0	0	0.000372749	0	0	0
OTU_72	125	Root	Bacteria	Proteobacteria	.	Deltaproteobacteria	.	.	.	Syntrophorhabdaceae	.	Syntrophorhabdus	.	0.99	Syntrophorhabdus_aromaticivorans_(T)_UI_(AB212873)	94.9	1	0.000163182	0	0	0	4.34556e-05	0	0	0	0.00235119	0.00147467	0	0
OTU_75	118	Root	Bacteria	Proteobacteria	.	Deltaproteobacteria	.	Desulfuromonadales	.	Geobacteraceae	.	Geoalkalibacter	.	0.94	Geoalkalibacter_ferrihydriticus_(T)_Z-0531_(DQ309326)	96.8	1	9.32466e-05	0	0	0	4.34556e-05	0	0	0	0.00174905	0.00221201	0	0
OTU_212	114	Root	Bacteria	Firmicutes	.	Clostridia	.	Natranaerobiales	.	Natranaerobiaceae	.	Dethiobacter	.	0.84	Dethiobacter_alkaliphilus_(T)_AHT_1_(EF422412)	95.3	1	2.33117e-05	0	0	0	0.00136885	0.00189298	0	0	0.000430095	0.000216863	0	0
OTU_71	111	Root	Bacteria	Bacteroidetes	.	.	.	.	.	.	.	.	.	0.96	Crocinitomix_catalasitica_(T)_IFO_15977_(AB078042)	88.1	4	0.000885843	0.00188776	0.000780843	0.0016573	4.34556e-05	0	0	0	0	0	0	0
OTU_78	101	Root	Bacteria	Firmicutes	.	Clostridia	.	.	.	.	.	.	.	0.65	Dethiobacter_alkaliphilus_(T)_AHT_1_(EF422412)	91.7	1	0	0	0	0	0.00126021	0.00258708	0	0	5.7346e-05	0	0	0
OTU_73	92	Root	Bacteria	.	.	.	.	.	.	.	.	.	.	0.99	*	0	1	0	0	0	0	0	0	0	0	0.000315403	0.00173491	0.00211494	0.00157453
OTU_79	92	Root	Bacteria	Proteobacteria	.	Deltaproteobacteria	.	Syntrophobacterales	.	Syntrophaceae	.	Smithella	.	0.58	Smithella_propionica_(T)_LYP_(AF126282)	92.5	2	0.00137539	0.00163265	0	0	2.17278e-05	0	0	0	0	0	0	0
OTU_80	86	Root	Bacteria	Firmicutes	.	Clostridia	.	.	.	.	.	.	.	0.67	Desulfotomaculum_kuznetsovii_strain_17_(NR_115129.1)	89.7	2	0	0	0	0	0.00108639	0.00220848	0	0	2.8673e-05	0	0	0
OTU_77	84	Root	Bacteria	Chloroflexi	.	Anaerolineae	.	Anaerolineales	.	Anaerolineaceae	.	.	.	0.99	Leptolinea_tardivitalis_(T)_YMTK-2_(AB109438)	93.7	1	0	0	0	0	0.000630106	0.00233468	0.00516796	0	0	0	0	0
OTU_85	83	Root	Bacteria	Proteobacteria	.	Deltaproteobacteria	.	Syntrophobacterales	.	Syntrophaceae	.	Syntrophus	.	0.75	Smithella_propionica_(T)_LYP_(AF126282)	95.3	1	0.00125883	0.00122449	0	0	6.51834e-05	0	0	0	5.7346e-05	0	0	0
OTU_82	79	Root	Bacteria	Actinobacteria	.	Actinobacteria	Coriobacteridae	Coriobacteriales	Coriobacterineae	Coriobacteriaceae	.	.	.	0.59	Atopobium_vaginae_(T)_CCUG_38953_(Y17195)	88.5	1	0.00118889	0	0	0	0.000304189	0	0	0	0.000401422	0	0	0
OTU_81	78	Root	Bacteria	Firmicutes	.	Clostridia	.	Clostridiales	.	.	.	.	.	0.73	*	0	1	0.0010024	0.00178571	0	0	0	0	0	0	0	0	0	0
OTU_84	75	Root	Bacteria	Firmicutes	.	Clostridia	.	Clostridiales	.	Ruminococcaceae	.	Ercella	.	0.99	Ruminococcaceae_bacterium_ZWB_4_(HG003571)	100	1	9.32466e-05	0	0	0	2.17278e-05	0	0	0	0.00131896	0.00104094	0	0
OTU_83	71	Root	Bacteria	Chloroflexi	.	Anaerolineae	.	Anaerolineales	.	Anaerolineaceae	.	.	.	0.63	Longilinea_arvoryzae_(T)_KOME-1_(AB243673)	86.6	2	0	0	0	0	2.17278e-05	0	0	0	0.000630806	0.00151804	0.000551724	0.000612316
OTU_201	65	Root	Bacteria	Synergistetes	.	Synergistia	.	Synergistales	.	Synergistaceae	.	Aminivibrio	.	0.91	Aminivibrio_pyruvatiphilus_4F6E_(AB623229)	91.7	1	0.0013987	0.000255102	0	0	0	0	0	0	0	0	0	0
OTU_87	63	Root	Bacteria	Firmicutes	.	Clostridia	.	Clostridiales	.	.	.	.	.	0.52	Desulfotomaculum_varum_RH04-3_(GU126374)	88.2	1	4.66233e-05	0	0	0	0	0	0	0	0.00111825	0.000477099	0.00101149	0
OTU_90	61	Root	Archaea	Euryarchaeota	.	Methanobacteria	.	Methanobacteriales	.	Methanobacteriaceae	.	Methanobacterium	.	1	Methanobacterium_formicicum_(T)_DSM_1535_(AF169245)	99.6	1	0.000233117	0	0	0	0.0003911	0	0	0	0.000946209	0	0	0
OTU_86	60	Root	Bacteria	Firmicutes	.	Negativicutes	.	Selenomonadales	.	Veillonellaceae	.	.	.	0.83	Veillonella_magna_(T)_lac18_(EU096495)	89.3	1	0.000116558	0	0	0	0	0	0	0	0.000802844	0.00117106	0	0
OTU_91	53	Root	Bacteria	Proteobacteria	.	Alphaproteobacteria	.	Sphingomonadales	.	Sphingomonadaceae	.	Sphingomonas	.	1	Sphingomonas_ginsenosidimutans_(T)_Gsoil_1429_(HM204925)	100	1	0	0	0	0.000473513	0	0	0	0	0	0.00195177	0	0
OTU_89	52	Root	Bacteria	Firmicutes	.	Clostridia	.	Clostridiales	.	.	.	.	.	0.94	Clostridium_putrificum_(T)_DSM_1734_(X73442)	92.1	1	0.000536168	0.00117347	0	0	8.69112e-05	0	0	0	5.7346e-05	0	0	0
OTU_88	52	Root	Bacteria	Acidobacteria	.	Acidobacteria_Gp3	.	.	.	.	.	Gp3	.	0.69	Acidobacteria_bacterium_P105_(KJ461654)	96	1	0	0	0	0	0.000673562	0.00132509	0	0	0	0	0	0
OTU_100	47	Root	Bacteria	Proteobacteria	.	Alphaproteobacteria	.	Rhizobiales	.	.	.	.	.	0.63	Pedomicrobium_manganicum_(T)_ATCC_33121_(GU269549)	92.1	3	0.000466233	0.000561224	0	0.000828648	2.17278e-05	0	0	0	2.8673e-05	0	0	0
OTU_103	45	Root	Bacteria	Firmicutes	.	Clostridia	.	Clostridiales	.	.	.	.	.	0.84	Gracilibacter_thermotolerans_(T)_JW/YJL-S1_(DQ117465)	90.5	1	0.00041961	0	0	0	0	0	0	0	0.000401422	0.000563845	0	0
OTU_106	44	Root	Bacteria	Bacteroidetes	.	Bacteroidia	.	Bacteroidales	.	Porphyromonadaceae	.	Proteiniphilum	.	0.88	Proteiniphilum_acetatigenes_(T)_TB107_(AY742226)	98	1	0.000629415	0.000306122	0	0	8.69112e-05	0	0	0	0.000200711	0	0	0
OTU_98	42	Root	Bacteria	Actinobacteria	.	Actinobacteria	Coriobacteridae	Coriobacteriales	Coriobacterineae	Coriobacteriaceae	.	.	.	0.5	Olegusella_massiliensis_strain_KHD7_(NR_146815.1)	89.7	1	0	0	0	0	0.000434556	0.00132509	0	0	2.8673e-05	0	0	0
OTU_105	41	Root	Bacteria	Firmicutes	.	Clostridia	.	Clostridiales	.	Ruminococcaceae	.	Clostridium III	.	0.54	Clostridium_hungatei_(T)_AD;_ATCC_700212_(AF020429)	94.9	2	0.000745973	0.000459184	0	0	0	0	0	0	0	0	0	0
OTU_94	41	Root	Bacteria	Firmicutes	.	Clostridia	.	Natranaerobiales	.	Natranaerobiaceae	.	Dethiobacter	.	0.58	Dethiobacter_alkaliphilus_(T)_AHT_1_(EF422412)	89.7	1	0.000349675	0	0	0	0.000304189	0	0	0	0.000344076	0	0	0
OTU_92	38	Root	Bacteria	Firmicutes	.	Clostridia	.	Clostridiales	.	Clostridiaceae 1	.	Clostridium sensu stricto	.	1	Clostridium_thermopalmarium_(T)_(X72869)	98	1	0	0	0	0	0	0	0	0	0.000487441	0.000910826	0	0
OTU_93	36	Root	Archaea	Euryarchaeota	.	Methanomicrobia	.	Methanomicrobiales	.	Methanoregulaceae	.	Methanolinea	.	0.91	Methanolinea_mesophila_TNR_(AB447467)	96.5	1	0	0	0	0	0	0	0	0	0.000172038	0.00082408	0.00101149	0
OTU_102	35	Root	Bacteria	Bacteroidetes	.	Bacteroidia	.	Bacteroidales	.	Porphyromonadaceae	.	Petrimonas	.	0.95	Lascolabacillus_massiliensis_strain_SIT8_(NR_144720.1)	97.2	1	0.000676038	0	0	0	4.34556e-05	0	0	0	0.000114692	0	0	0
OTU_99	35	Root	Bacteria	Bacteroidetes	.	.	.	.	.	.	.	.	.	0.99	Pedobacter_sp._MIC2002_(JX978785)	87	1	0.000303051	0	0	0	0.0003911	0	0	0	0.000114692	0	0	0
OTU_97	33	Root	Bacteria	Firmicutes	.	Clostridia	.	Clostridiales	.	Ruminococcaceae	.	.	.	0.5	Thermincola_carboxydiphila_(T)_2204_(AY603000)	89.3	1	0.000209805	0	0	0	0.000217278	0	0	0	0.000401422	0	0	0
OTU_101	33	Root	Bacteria	Firmicutes	.	Clostridia	.	Clostridiales	.	Eubacteriaceae	.	Alkalibacter	.	1	Alkalibacter_saccharofermentans_(T)_Z-79820_(AY312403)	100	1	0.00041961	0	0	0	0.00019555	0	0	0	0.000172038	0	0	0
OTU_113	31	Root	Bacteria	Bacteroidetes	.	.	.	.	.	.	.	.	.	0.99	Alkalitalea_saponilacus_(T)_SC/BZ-SP2_(HQ191474)	88.9	2	0.00069935	0	0	0	2.17278e-05	0	0	0	0	0	0	0
OTU_95	28	Root	Bacteria	Spirochaetes	.	Spirochaetia	.	Spirochaetales	.	Spirochaetaceae	.	Sphaerochaeta	.	1	Sphaerochaeta_globus_str._Buddy_(AF357916)	98.8	1	0	0.00102041	0.00104112	0	0	0	0	0	0	0	0	0
OTU_96	28	Root	Bacteria	Firmicutes	.	Clostridia	.	Clostridiales	.	Syntrophomonadaceae	.	Syntrophomonas	.	0.94	Syntrophomonas_zehnderi_(T)_OL-4_(DQ898277)	94.5	1	0	0	0	0	4.34556e-05	0	0	0	5.7346e-05	0.00104094	0	0
OTU_104	28	Root	Archaea	Euryarchaeota	.	Methanobacteria	.	Methanobacteriales	.	.	.	.	.	0.53	Methanobrevibacter_boviskoreani_JH1_(KC608769)	85.8	1	0.000536168	0	0.000520562	0	2.17278e-05	0	0	0	0	0	0	0
OTU_108	27	Root	Bacteria	Firmicutes	.	.	.	.	.	.	.	.	.	0.96	Bacillaceae_bacterium_13CC_(JN571119)	90.9	1	0.000233117	0	0	0	0.000217278	0	0	0	0.000200711	0	0	0
OTU_126	27	Root	Bacteria	Proteobacteria	.	Gammaproteobacteria	.	Pseudomonadales	.	Pseudomonadaceae	.	Pseudomonas	.	0.88	Pseudomonas_aestusnigri_CCUG_64165;_VGXO14_(HG004394)	98.4	1	0.00041961	0	0	0	8.69112e-05	0	0	0	0.000143365	0	0	0
OTU_107	25	Root	Bacteria	Firmicutes	.	Clostridia	.	Clostridiales	.	.	.	Vallitalea	.	0.66	Vallitalea_pronyensis_FatNI3_(KC876639)	96	1	2.33117e-05	0	0	0	0	0	0	0	0.000487441	0.000303609	0	0
OTU_112	25	Root	Bacteria	Bacteroidetes	.	.	.	.	.	.	.	.	.	0.98	Lutaonella_thermophila_(T)_CC-MHSW-2_(EU287913)	86.6	1	0.000349675	0	0	0	0.000108639	0	0	0	0.000143365	0	0	0
OTU_124	25	Root	Bacteria	Firmicutes	.	Clostridia	.	Clostridiales	.	.	.	.	.	0.97	Clostridium_acetireducens_(T)_30A_(X79862)	93.7	2	0.000582791	0	0	0	0	0	0	0	0	0	0	0
OTU_147	24	Root	Bacteria	Firmicutes	.	.	.	.	.	.	.	.	.	0.55	Anaerobacterium_chartisolvens_T-1-35_(AB793710)	86.6	3	0.000256428	0	0	0	0.00019555	0	0	0	0.000114692	0	0	0
OTU_110	24	Root	Bacteria	Chloroflexi	.	Anaerolineae	.	Anaerolineales	.	Anaerolineaceae	.	Ornatilinea	.	0.57	Ornatilinea_apprima_P3M-1_(JQ292916)	93.7	1	0	0	0	0	4.34556e-05	0	0	0	0.000229384	0.000607217	0	0
OTU_117	23	Root	Bacteria	Proteobacteria	.	Gammaproteobacteria	.	Chromatiales	.	.	.	.	.	0.56	Spiribacter_salinus_M19-40_(CP005963)	92.9	2	0.000326363	0	0	0	0.000108639	0	0	0	0.000114692	0	0	0
OTU_109	23	Root	Bacteria	Firmicutes	.	Clostridia	.	Clostridiales	.	.	.	.	.	0.85	Pelotomaculum_thermopropionicum_(T)_SI_(AB035723)	88.5	1	0	0	0	0	0	0	0	0	0.000458768	0.000303609	0	0
OTU_111	22	Root	Bacteria	Firmicutes	.	.	.	.	.	.	.	.	.	0.72	Gelria_glutamica_(T)_TGO_(AF321086)	87.4	1	0.000186493	0	0	0	8.69112e-05	0	0	0	0.00028673	0	0	0
OTU_131	21	Root	Bacteria	Firmicutes	.	Clostridia	.	Clostridiales	.	Syntrophomonadaceae	.	Syntrophomonas	.	0.63	Pelospora_glutarica_(T)_WoGl3_(AJ251214)	96	1	0.00013987	0	0	0	2.17278e-05	0	0	0	0.000315403	0.000130118	0	0
OTU_121	21	Root	Bacteria	Firmicutes	.	Clostridia	.	Clostridiales	.	Syntrophomonadaceae	.	Syntrophomonas	.	0.98	Syntrophomonas_zehnderi_(T)_OL-4_(DQ898277)	95.3	1	0.000256428	0	0	0	0.00019555	0	0	0	2.8673e-05	0	0	0
OTU_114	20	Root	Bacteria	Firmicutes	.	Bacilli	.	Lactobacillales	.	Lactobacillaceae	.	Lactobacillus	.	1	Lactobacillus_gasseri_(T)_ATCC_33323_(AF519171)	100	4	0	0	0	0	0.000282461	0	0	0	0.000200711	0	0	0
OTU_122	19	Root	Bacteria	Actinobacteria	.	Actinobacteria	Rubrobacteridae	.	.	.	.	.	.	0.56	Streptomyces_aomiensis_(T)_M24DS04_(AB522686)	89.3	3	0.000256428	0	0	0	0	0	0	0	0.000229384	0	0	0
OTU_123	18	Root	Bacteria	Bacteroidetes	.	Bacteroidia	.	Bacteroidales	.	Prolixibacteraceae	.	.	.	0.67	Mariniphaga_sediminis_strain_SY21_(NR_137221.1)	91.3	1	0.000372986	0	0	0	2.17278e-05	0	0	0	2.8673e-05	0	0	0
OTU_148	17	Root	Bacteria	Bacteroidetes	.	.	.	.	.	.	.	.	.	0.99	Cytophaga_xylanolytica_strain_DSM_6779_(NR_117112.1)	86.2	2	0.000116558	0	0	0	0.000130367	0	0	0	0.000172038	0	0	0
OTU_133	16	Root	Bacteria	Proteobacteria	.	Alphaproteobacteria	.	Rhizobiales	.	Rhodobiaceae	.	Parvibaculum	.	1	Parvibaculum_lavamentivorans_(T)_DS-1_(AY387398)	100	1	0.000116558	0	0	0	0.000152095	0	0	0	0.000114692	0	0	0
OTU_129	16	Root	Bacteria	Firmicutes	.	Clostridia	.	Clostridiales	.	.	.	.	.	1	Natranaerovirga_pectinivora_(T)_AP3_(GQ922846)	94.9	1	0.000116558	0	0	0	0.000130367	0	0	0	0.000143365	0	0	0
OTU_132	15	Root	Bacteria	Ignavibacteriae	.	Ignavibacteria	.	Ignavibacteriales	.	Ignavibacteriaceae	.	Melioribacter	.	0.81	Melioribacter_roseus_P3M-2_(JQ292917)	95.7	1	0.00013987	0	0	0	0.000108639	0	0	0	0.000114692	0	0	0
OTU_145	15	Root	Bacteria	Bacteroidetes	.	.	.	.	.	.	.	.	.	1	Sunxiuqinia_faeciviva_(T)_JAM-BA0302_(AB362263)	85.8	1	0.000116558	0	0	0	0.000130367	0	0	0	0.000114692	0	0	0
OTU_115	14	Root	Bacteria	Bacteroidetes	.	Bacteroidia	.	Bacteroidales	.	Porphyromonadaceae	.	.	.	0.97	Muribaculum_intestinale_strain_YL27_(NR_144616.1)	93.7	1	0.000116558	0	0	0	0.000130367	0	0	0	8.6019e-05	0	0	0
OTU_153	14	Root	Bacteria	Tenericutes	.	Mollicutes	.	Acholeplasmatales	.	Acholeplasmataceae	.	Acholeplasma	.	0.99	Acholeplasma_parvum_(T)_H23M_(AY538170)	94.8	1	0.00013987	0	0	0	6.51834e-05	0	0	0	0.000143365	0	0	0
OTU_116	14	Root	Bacteria	Verrucomicrobia	.	Verrucomicrobiae	.	Verrucomicrobiales	.	Verrucomicrobiaceae	.	Akkermansia	.	1	Akkermansia_muciniphila_(T)_Muc_(AY271254)	100	1	0.000326363	0	0	0	0	0	0	0	0	0	0	0
OTU_118	14	Root	Bacteria	Spirochaetes	.	Spirochaetia	.	Spirochaetales	.	Spirochaetaceae	.	Treponema	.	1	Treponema_caldarium_(T)_DSMZ7334_(EU580141)	96	1	0.000186493	0	0.000390422	0.000118378	0	0	0	0	2.8673e-05	0	0	0
OTU_137	13	Root	Bacteria	Firmicutes	.	Clostridia	.	Clostridiales	.	Ruminococcaceae	.	Clostridium III	.	0.72	[Clostridium]_caenicola_strain_EBR596_(NR_126170.1)	94.9	1	2.33117e-05	0	0	0	0	0	0	0	0.000315403	4.33727e-05	0	0
OTU_135	13	Root	Bacteria	Firmicutes	.	Clostridia	.	Clostridiales	.	Gracilibacteraceae	.	.	.	0.5	Gracilibacter_thermotolerans_(T)_JW/YJL-S1_(DQ117465)	90.1	1	2.33117e-05	0	0	0	6.51834e-05	0	0	0	0.000258057	0	0	0
OTU_154	13	Root	Bacteria	Synergistetes	.	Synergistia	.	Synergistales	.	Synergistaceae	.	Thermovirga	.	0.88	Thermovirga_lienii_(T)_Cas60314_(DQ071273)	91.7	1	2.33117e-05	0	0	0	0.000152095	0	0	0	0.000143365	0	0	0
OTU_170	12	Root	Archaea	Euryarchaeota	.	Methanobacteria	.	Methanobacteriales	.	Methanobacteriaceae	.	Methanobacterium	.	1	Methanobacterium_oryzae_(T)_FPi_(AF028690)	99.6	1	4.66233e-05	0	0	0	0.000173822	0	0	0	5.7346e-05	0	0	0
OTU_120	12	Root	Bacteria	Bacteroidetes	.	Bacteroidia	.	Bacteroidales	.	Porphyromonadaceae	.	.	.	0.85	Muribaculum_intestinale_strain_YL27_(NR_144616.1)	89.7	1	0.000116558	0	0	0	8.69112e-05	0	0	0	8.6019e-05	0	0	0
OTU_119	12	Root	Bacteria	Firmicutes	.	.	.	.	.	.	.	.	.	0.84	Vallitalea_pronyensis_FatNI3_(KC876639)	88.5	1	0	0	0	0	0	0	0	0	0	0.000520472	0	0
OTU_140	12	Root	Bacteria	Proteobacteria	.	Alphaproteobacteria	.	Rhodobacterales	.	Rhodobacteraceae	.	.	.	1	Paracoccus_aestuarii_(T)_B7_(EF660757)	99.2	7	0.000116558	0	0	0	8.69112e-05	0	0	0	8.6019e-05	0	0	0
OTU_130	12	Root	Bacteria	Firmicutes	.	Bacilli	.	Bacillales	.	Bacillales_incertae_sedis	.	Desulfuribacillus	.	1	Desulfuribacillus_alkaliarsenatis_AHT28_(HM046584)	99.2	1	2.33117e-05	0	0	0	2.17278e-05	0	0	0	0.00028673	0	0	0
OTU_128	12	Root	Bacteria	Firmicutes	.	Bacilli	.	Lactobacillales	.	Lactobacillaceae	.	Lactobacillus	.	0.97	Lactobacillus_faecis_AFL13-2_(AB812750)	100	4	0	0	0	0	0.000152095	0	0	0	0.000143365	0	0	0
OTU_125	11	Root	Bacteria	Bacteroidetes	.	Bacteroidia	.	Bacteroidales	.	Porphyromonadaceae	.	Odoribacter	.	0.99	Culturomica_massiliensis_strain_Marseille-P2698_(NR_144745.1)	93.3	1	0	0	0	0	0.00019555	0	0	0	5.7346e-05	0	0	0
OTU_127	11	Root	Bacteria	.	.	.	.	.	.	.	.	.	.	1	Desulfosporosinus_orientis_(T)_DSM_765_(Y11570)	89.7	3	0	0	0	0	0	0	0	0	0.000315403	0	0	0
OTU_146	11	Root	Bacteria	Proteobacteria	.	Deltaproteobacteria	.	Syntrophobacterales	.	Syntrophaceae	.	.	.	0.97	Smithella_propionica_(T)_LYP_(AF126282)	94.5	1	0.000209805	0	0	0	2.17278e-05	0	0	0	2.8673e-05	0	0	0
OTU_142	10	Root	Bacteria	Chloroflexi	.	Anaerolineae	.	Anaerolineales	.	Anaerolineaceae	.	.	.	0.65	Bellilinea_caldifistulae_(T)_GOMI-1_(AB243672)	87.7	1	0	0	0	0	8.69112e-05	0	0	0	0.000172038	0	0	0
OTU_144	10	Root	Bacteria	Bacteroidetes	.	Bacteroidia	.	Bacteroidales	.	.	.	.	.	0.72	Porphyromonas_pogonae_strain_MI_10-1288_(NR_136443.1)	86.2	1	0.000116558	0	0	0	0	0	0	0	0.000143365	0	0	0
OTU_205	10	Root	Bacteria	Bacteroidetes	.	.	.	.	.	.	.	.	.	0.98	Natronoflexus_pectinivorans_AP1_(GQ922844)	88.1	2	6.9935e-05	0	0	0	4.34556e-05	0	0	0	0.000143365	0	0	0
OTU_186	10	Root	Bacteria	Firmicutes	.	Clostridia	.	Clostridiales	.	.	.	.	.	0.55	Desulfitobacterium_hafniense_(T)_DCB-2_(CP001336)	88.5	6	6.9935e-05	0	0	0	0	0	0	0	0.000200711	0	0	0
OTU_141	10	Root	Bacteria	Firmicutes	.	Clostridia	.	Clostridiales	.	Clostridiales_Incertae Sedis XI	.	Tissierella	.	0.61	Soehngenia_saccharolytica_(T)_BOR-Y_(AY353956)	96.8	1	9.32466e-05	0	0	0	4.34556e-05	0	0	0	0.000114692	0	0	0
OTU_179	10	Root	Bacteria	Firmicutes	.	Clostridia	.	.	.	.	.	.	.	0.61	Caloramator_fervidus_(T)_RT4._B1_(L09187)	89.7	1	0	0	0	0	0.00019555	0	0	0	2.8673e-05	0	0	0
OTU_150	10	Root	Bacteria	Tenericutes	.	Mollicutes	.	Acholeplasmatales	.	Acholeplasmataceae	.	Acholeplasma	.	0.9	Acholeplasma_parvum_(T)_H23M_(AY538170)	92.9	1	2.33117e-05	0	0	0	4.34556e-05	0	0	0	0.000200711	0	0	0
OTU_167	9	Root	Bacteria	Bacteroidetes	.	Flavobacteriia	.	Flavobacteriales	.	.	.	.	.	0.5	Cytophaga_fermentans_(T)_ATCC_19072_(M58766)	88.9	1	0	0	0	0	0.000108639	0	0	0	0.000114692	0	0	0
OTU_183	9	Root	Bacteria	Proteobacteria	.	Deltaproteobacteria	.	Desulfovibrionales	.	Desulfovibrionaceae	.	Desulfovibrio	.	1	Desulfovibrio_psychrotolerans_(T)_type_strain:_PWC_=_JS1_(AM418397)	99.2	1	0.000163182	0	0	0	2.17278e-05	0	0	0	2.8673e-05	0	0	0
OTU_177	9	Root	Bacteria	Bacteroidetes	.	Bacteroidia	.	Bacteroidales	.	Porphyromonadaceae	.	.	.	0.87	Muribaculum_intestinale_strain_YL27_(NR_144616.1)	91.3	1	4.66233e-05	0	0	0	4.34556e-05	0	0	0	0.000143365	0	0	0
OTU_164	9	Root	Bacteria	.	.	.	.	.	.	.	.	.	.	1	Thermanaerovibrio_acidaminovorans_strain_DSM_6589_(NR_114455.1)	87	1	0	0	0	0	0.00019555	0	0	0	0	0	0	0
OTU_159	9	Root	Bacteria	.	.	.	.	.	.	.	.	.	.	1	*	0	1	6.9935e-05	0	0	0	8.69112e-05	0	0	0	5.7346e-05	0	0	0
OTU_156	9	Root	Bacteria	Firmicutes	.	Clostridia	.	Thermoanaerobacterales	.	Thermoanaerobacteraceae	.	Moorella	.	0.98	Moorella_glycerini_(T)_YS6_(U82327)	95.7	3	0	0	0	0	6.51834e-05	0	0	0	0.000172038	0	0	0
OTU_138	9	Root	Bacteria	Firmicutes	.	Clostridia	.	Clostridiales	.	.	.	.	.	0.84	Gracilibacter_thermotolerans_(T)_JW/YJL-S1_(DQ117465)	91.7	1	0	0	0	0	0	0	0	0	0	0.000390354	0	0
OTU_152	9	Root	Bacteria	Deferribacteres	.	Deferribacteres	.	Deferribacterales	.	Deferribacteraceae	.	Geovibrio	.	1	Geovibrio_ferrireducens_(T)_PAL-1_(X95744)	99.2	1	6.9935e-05	0	0	0	0.000108639	0	0	0	2.8673e-05	0	0	0
OTU_149	9	Root	Bacteria	Firmicutes	.	Clostridia	.	Clostridiales	.	Clostridiaceae 2	.	Anoxynatronum	.	0.58	Anoxynatronum_sibiricum_(T)_Z-7981_(AF522323)	99.2	1	0.000163182	0	0	0	2.17278e-05	0	0	0	2.8673e-05	0	0	0
OTU_139	8	Root	Bacteria	Firmicutes	.	Clostridia	.	Clostridiales	.	.	.	.	.	0.99	Christensenella_minuta_YIT_12065_(AB490809)	93.3	1	0.000186493	0	0	0	0	0	0	0	0	0	0	0
OTU_171	8	Root	Bacteria	Bacteroidetes	.	Bacteroidia	.	Bacteroidales	.	Porphyromonadaceae	.	.	.	0.97	Muribaculum_intestinale_strain_YL27_(NR_144616.1)	93.7	1	4.66233e-05	0	0	0	6.51834e-05	0	0	0	8.6019e-05	0	0	0
OTU_134	8	Root	Bacteria	Firmicutes	.	.	.	.	.	.	.	.	.	0.59	*	0	1	6.9935e-05	0	0	0	6.51834e-05	0	0	0	5.7346e-05	0	0	0
OTU_157	8	Root	Bacteria	Bacteroidetes	.	Bacteroidia	.	Bacteroidales	.	Porphyromonadaceae	.	Petrimonas	.	0.88	Petrimonas_sulfuriphila_(T)_BN3_(AY570690)	95.3	1	0.000163182	0	0	0	0	0	0	0	2.8673e-05	0	0	0
OTU_143	7	Root	Archaea	Euryarchaeota	.	Methanobacteria	.	Methanobacteriales	.	Methanobacteriaceae	.	Methanobacterium	.	0.98	Methanobacterium_subterraneum_(T)_A8p,_DSM_11074_(X99044)	96.9	1	0	0	0	0	0	0	0	0	0	0.000303609	0	0
OTU_220	7	Root	Bacteria	Firmicutes	.	Clostridia	.	Clostridiales	.	Clostridiaceae 2	.	Alkaliphilus	.	0.87	Alkaliphilus_peptidifermentans_(T)_Z-7036_(EF382660)	98.8	1	9.32466e-05	0	0	0	2.17278e-05	0	0	0	5.7346e-05	0	0	0
OTU_184	7	Root	Bacteria	Proteobacteria	.	Deltaproteobacteria	.	Syntrophobacterales	.	Syntrophaceae	.	Smithella	.	0.93	Smithella_propionica_(T)_LYP_(AF126282)	92.9	1	4.66233e-05	0	0	0	2.17278e-05	0	0	0	0.000114692	0	0	0
OTU_221	7	Root	Bacteria	Chloroflexi	.	Anaerolineae	.	Anaerolineales	.	Anaerolineaceae	.	Ornatilinea	.	0.93	Ornatilinea_apprima_P3M-1_(JQ292916)	89.3	1	6.9935e-05	0	0	0	6.51834e-05	0	0	0	2.8673e-05	0	0	0
OTU_207	7	Root	Bacteria	Firmicutes	.	Clostridia	.	Natranaerobiales	.	Natranaerobiaceae	.	Dethiobacter	.	0.96	Dethiobacter_alkaliphilus_(T)_AHT_1_(EF422412)	96	1	0	0	0	0	6.51834e-05	0	0	0	0.000114692	0	0	0
OTU_185	7	Root	Bacteria	Firmicutes	.	Clostridia	.	Clostridiales	.	Ruminococcaceae	.	Acetanaerobacterium	.	0.64	Acetanaerobacterium_elongatum_(T)_Z7_(AY487928)	91.7	1	4.66233e-05	0	0	0	2.17278e-05	0	0	0	0.000114692	0	0	0
OTU_136	7	Root	Bacteria	Chloroflexi	.	Anaerolineae	.	Anaerolineales	.	Anaerolineaceae	.	Ornatilinea	.	0.57	anaerobic_bacterium_MO-CFX1_(AB598277)	91.7	1	0	0	0	0	0	0	0	0	0.000200711	0	0	0
OTU_155	7	Root	Bacteria	Bacteroidetes	.	Bacteroidia	.	Bacteroidales	.	Porphyromonadaceae	.	Coprobacter	.	0.51	Muribaculum_intestinale_strain_YL27_(NR_144616.1)	94.8	1	0	0	0	0	0.000108639	0	0	0	5.7346e-05	0	0	0
OTU_158	7	Root	Bacteria	.	.	.	.	.	.	.	.	.	.	0.99	Aminobacterium_colombiense_strain_DSM_12261_(NR_074624.1)	85.8	2	9.32466e-05	0	0	0	4.34556e-05	0	0	0	2.8673e-05	0	0	0
OTU_151	7	Root	Bacteria	Proteobacteria	.	.	.	.	.	.	.	.	.	0.53	*	0	1	2.33117e-05	0	0	0	0.000108639	0	0	0	2.8673e-05	0	0	0
OTU_169	6	Root	Bacteria	Firmicutes	.	Clostridia	.	Thermoanaerobacterales	.	Thermoanaerobacteraceae	.	.	.	0.8	Thermoanaerobacter_thermocopriae_(T)_JT-3T_(L09167)	91.7	3	0.00013987	0	0	0	0	0	0	0	0	0	0	0
OTU_160	6	Root	Bacteria	Firmicutes	.	.	.	.	.	.	.	.	.	0.51	Calditerricola_yamamurae_(T)_YMO722_(AB308475)	86.6	2	6.9935e-05	0	0	0	2.17278e-05	0	0	0	5.7346e-05	0	0	0
OTU_165	6	Root	Bacteria	Chloroflexi	.	Anaerolineae	.	Anaerolineales	.	Anaerolineaceae	.	.	.	0.95	Thermanaerothrix_daxensis_strain_GNS-1_(NR_117865.1)	85.4	1	4.66233e-05	0	0	0	8.69112e-05	0	0	0	0	0	0	0
OTU_161	6	Root	Bacteria	Proteobacteria	.	Deltaproteobacteria	.	Desulfuromonadales	.	Desulfuromonadaceae	.	Desulfuromonas	.	0.95	Desulfuromonas_thiophila_(T)_NZ27_(DSMZ_8987)_(Y11560)	96.4	2	0.000116558	0	0	0	2.17278e-05	0	0	0	0	0	0	0
OTU_162	6	Root	Bacteria	Proteobacteria	.	Gammaproteobacteria	.	Enterobacteriales	.	Enterobacteriaceae	.	Citrobacter	.	0.59	Citrobacter_sedlakii_(T)_CDC_4696-86_(AF025364)	100	4	9.32466e-05	0	0	0	2.17278e-05	0	0	0	2.8673e-05	0	0	0
OTU_176	6	Root	Bacteria	Firmicutes	.	Clostridia	.	Clostridiales	.	Clostridiales_Incertae Sedis XI	.	Sedimentibacter	.	1	Sedimentibacter_saalensis_(T)_ZF2_(AJ404680)	99.6	1	2.33117e-05	0	0	0	6.51834e-05	0	0	0	5.7346e-05	0	0	0
OTU_163	6	Root	Bacteria	Firmicutes	.	Clostridia	.	Clostridiales	.	Clostridiaceae 2	.	Alkaliphilus	.	1	Alkaliphilus_crotonatoxidans_(T)_B11-2_(AF467248)	100	2	0.000116558	0	0	0	2.17278e-05	0	0	0	0	0	0	0
OTU_192	6	Root	Bacteria	Proteobacteria	.	Deltaproteobacteria	.	Syntrophobacterales	.	Syntrophaceae	.	Smithella	.	0.64	Smithella_propionica_(T)_LYP_(AF126282)	97.2	1	0.000116558	0	0	0	2.17278e-05	0	0	0	0	0	0	0
OTU_214	6	Root	Bacteria	Thermotogae	.	Thermotogae	.	Kosmotogales	.	Kosmotogaceae	.	Mesotoga	.	1	Thermotogales_bacterium_MesG1Ag4.2.16S.B_(HM003109)	98.4	1	6.9935e-05	0	0	0	6.51834e-05	0	0	0	0	0	0	0
OTU_166	5	Root	Bacteria	Firmicutes	.	Clostridia	.	Clostridiales	.	.	.	.	.	0.99	Defluviitalea_saccharophila_(T)_LIND6LT2_(HQ020487)	92.9	1	2.33117e-05	0	0	0	0	0	0	0	0.000114692	0	0	0
OTU_219	5	Root	Bacteria	.	.	.	.	.	.	.	.	.	.	1	Streptomyces_cinereorectus_(T)_NBRC_15395_(AB184646)	86.6	12	0	0	0	0	0.000108639	0	0	0	0	0	0	0
OTU_206	5	Root	Bacteria	Firmicutes	.	Clostridia	.	Clostridiales	.	.	.	.	.	0.69	Moorella_humiferrea_(T)_64_FGQ_(GQ872425)	92.9	1	9.32466e-05	0	0	0	0	0	0	0	2.8673e-05	0	0	0
OTU_199	5	Root	Archaea	Euryarchaeota	.	Methanomicrobia	.	Methanomicrobiales	.	Methanomicrobiaceae	.	Methanofollis	.	1	Methanofollis_tationis_(T)_DSM_2702_(AF095272)	99.6	2	6.9935e-05	0	0	0	2.17278e-05	0	0	0	2.8673e-05	0	0	0
OTU_208	5	Root	Bacteria	Chloroflexi	.	Anaerolineae	.	Anaerolineales	.	Anaerolineaceae	.	.	.	1	Levilinea_saccharolytica_(T)_KIBI-1_(AB109439)	95.3	1	0	0	0	0	8.69112e-05	0	0	0	2.8673e-05	0	0	0
OTU_168	5	Root	Bacteria	Firmicutes	.	Clostridia	.	Clostridiales	.	Clostridiales_Incertae Sedis XIV	.	Anaerobranca	.	1	Anaerobranca_zavarzinii_(T)_JW/VK-KS5Y_(EF190921)	100	1	2.33117e-05	0	0	0	6.51834e-05	0	0	0	2.8673e-05	0	0	0
OTU_188	5	Root	Bacteria	Bacteroidetes	.	Bacteroidia	.	Bacteroidales	.	Porphyromonadaceae	.	.	.	0.84	Muribaculum_intestinale_strain_YL27_(NR_144616.1)	89.3	1	4.66233e-05	0	0	0	2.17278e-05	0	0	0	5.7346e-05	0	0	0
OTU_180	4	Root	Bacteria	Proteobacteria	.	Alphaproteobacteria	.	Rhizobiales	.	Methylocystaceae	.	Pleomorphomonas	.	0.99	Pleomorphomonas_diazotrophica_R5-392_(JQ346801)	100	2	2.33117e-05	0	0	0	6.51834e-05	0	0	0	0	0	0	0
OTU_173	4	Root	Bacteria	Proteobacteria	.	Alphaproteobacteria	.	Rhizobiales	.	Phyllobacteriaceae	.	.	.	0.93	Mesorhizobium_camelthorni_(T)_CCNWXJ40-4_(EU169581)	99.6	1	4.66233e-05	0	0	0	4.34556e-05	0	0	0	0	0	0	0
OTU_215	4	Root	Bacteria	Firmicutes	.	Clostridia	.	Clostridiales	.	.	.	.	.	0.55	Lutispora_thermophila_(T)_EBR46_(AB186360)	89.3	2	6.9935e-05	0	0	0	2.17278e-05	0	0	0	0	0	0	0
OTU_217	4	Root	Bacteria	.	.	.	.	.	.	.	.	.	.	1	uncultured_candidate_division_BRC1_bacterium_LD1-PA21_(AY114315)	89.3	1	9.32466e-05	0	0	0	0	0	0	0	0	0	0	0
OTU_218	4	Root	Bacteria	Firmicutes	.	Clostridia	.	Clostridiales	.	.	.	.	.	0.69	Gelria_glutamica_(T)_TGO_(AF321086)	89.7	1	0	0	0	0	8.69112e-05	0	0	0	0	0	0	0
OTU_187	4	Root	Bacteria	Firmicutes	.	Clostridia	.	Clostridiales	.	Ruminococcaceae	.	Clostridium III	.	0.9	Pseudobacteroides_cellulosolvens_(L35517)	95.7	3	0	0	0	0	0	0	0	0	0.000114692	0	0	0
OTU_209	4	Root	Bacteria	Bacteroidetes	.	.	.	.	.	.	.	.	.	1	Cytophaga_xylanolytica_strain_DSM_6779_(NR_117112.1)	85.8	1	2.33117e-05	0	0	0	4.34556e-05	0	0	0	2.8673e-05	0	0	0
OTU_175	4	Root	Bacteria	Bacteroidetes	.	Bacteroidia	.	Bacteroidales	.	Porphyromonadaceae	.	Coprobacter	.	0.5	Muribaculum_intestinale_strain_YL27_(NR_144616.1)	90.5	1	0	0	0	0	2.17278e-05	0	0	0	8.6019e-05	0	0	0
OTU_182	4	Root	Bacteria	Firmicutes	.	Clostridia	.	Clostridiales	.	.	.	.	.	0.79	Desulfotomaculum_acetoxidans_(T)_DSM_771_(Y11566)	90.9	1	2.33117e-05	0	0	0	4.34556e-05	0	0	0	2.8673e-05	0	0	0
OTU_178	4	Root	Bacteria	Proteobacteria	.	Deltaproteobacteria	.	Syntrophobacterales	.	Syntrophaceae	.	Smithella	.	0.7	Smithella_propionica_(T)_LYP_(AF126282)	93.3	1	4.66233e-05	0	0	0	4.34556e-05	0	0	0	0	0	0	0
OTU_196	3	Root	Bacteria	Bacteroidetes	.	Bacteroidia	.	Bacteroidales	.	Porphyromonadaceae	.	.	.	0.98	Muribaculum_intestinale_strain_YL27_(NR_144616.1)	96.4	1	2.33117e-05	0	0	0	0	0	0	0	5.7346e-05	0	0	0
OTU_181	3	Root	Bacteria	.	.	.	.	.	.	.	.	.	.	0.9	*	0	1	0	0	0.000130141	0	0	0	0.000287109	0	0	0	9.1954e-05	0
OTU_204	3	Root	Bacteria	Firmicutes	.	Clostridia	.	Clostridiales	.	Lachnospiraceae	.	Clostridium XlVa	.	1	Clostridium_saccharolyticum_(T)_DSM_2544_(Y18185)	100	1	0	0	0	0	0	0	0	0	8.6019e-05	0	0	0
OTU_193	3	Root	Bacteria	Proteobacteria	.	Betaproteobacteria	.	Procabacteriales	.	Procabacteriaceae	.	Candidatus Procabacter	.	1	Candidatus_Procabacter_acanthamoebae_(AF177427)	99.2	1	4.66233e-05	0	0	0	2.17278e-05	0	0	0	0	0	0	0
OTU_191	3	Root	Bacteria	Chloroflexi	.	Anaerolineae	.	Anaerolineales	.	Anaerolineaceae	.	.	.	0.8	*	0	1	6.9935e-05	0	0	0	0	0	0	0	0	0	0	0
OTU_174	3	Root	Bacteria	Bacteroidetes	.	Bacteroidia	.	Bacteroidales	.	Porphyromonadaceae	.	.	.	0.97	Muribaculum_intestinale_strain_YL27_(NR_144616.1)	91.7	1	4.66233e-05	0	0	0	0	0	0	0	2.8673e-05	0	0	0
OTU_202	3	Root	Archaea	Euryarchaeota	.	Methanomicrobia	.	Methanomicrobiales	.	Methanoregulaceae	.	Methanoregula	.	1	Methanoregula_formicica_(T)_SMSP_(AB479390)	99.6	1	6.9935e-05	0	0	0	0	0	0	0	0	0	0	0
OTU_224	3	Root	Bacteria	Firmicutes	.	Clostridia	.	Clostridiales	.	.	.	.	.	0.65	Gracilibacter_thermotolerans_(T)_JW/YJL-S1_(DQ117465)	90.5	1	0	0	0	0	4.34556e-05	0	0	0	2.8673e-05	0	0	0
OTU_213	3	Root	Bacteria	Acidobacteria	.	Acidobacteria_Gp23	.	.	.	.	.	Thermoanaerobaculum	.	0.56	uncultured_bacterium_FW34_(AF523981)	94.5	1	6.9935e-05	0	0	0	0	0	0	0	0	0	0	0
OTU_223	3	Root	Bacteria	Acidobacteria	.	Acidobacteria_Gp23	.	.	.	.	.	Gp23	.	0.65	uncultured_bacterium_FW34_(AF523981)	96	1	6.9935e-05	0	0	0	0	0	0	0	0	0	0	0
OTU_225	3	Root	Bacteria	Bacteroidetes	.	Bacteroidia	.	Bacteroidales	.	Porphyromonadaceae	.	.	.	0.97	Muribaculum_intestinale_strain_YL27_(NR_144616.1)	93.7	1	0	0	0	0	2.17278e-05	0	0	0	5.7346e-05	0	0	0
OTU_189	2	Root	Bacteria	Firmicutes	.	Clostridia	.	Clostridiales	.	Peptococcaceae 1	.	.	.	0.94	Dehalobacter_restrictus_(T)_PER-K23_(U84497)	95.6	1	4.66233e-05	0	0	0	0	0	0	0	0	0	0	0
OTU_216	2	Root	Bacteria	Bacteroidetes	.	Bacteroidia	.	Bacteroidales	.	Bacteroidaceae	.	Bacteroides	.	1	Bacteroides_acidifaciens_(T)_A40_(AB021164)	100	1	2.33117e-05	0	0	0	2.17278e-05	0	0	0	0	0	0	0
OTU_194	2	Root	Bacteria	Firmicutes	.	Clostridia	.	Clostridiales	.	Ruminococcaceae	.	Saccharofermentans	.	0.91	Saccharofermentans_acetigenes_(T)_P6_(AY949857)	95.3	1	4.66233e-05	0	0	0	0	0	0	0	0	0	0	0
OTU_190	2	Root	Bacteria	Firmicutes	.	Clostridia	.	.	.	.	.	.	.	0.88	Desulfurispora_thermophila_(T)_RA50E1_(AY548776)	90.9	1	0	0	0	0	4.34556e-05	0	0	0	0	0	0	0
OTU_211	2	Root	Bacteria	Proteobacteria	.	Betaproteobacteria	.	Burkholderiales	.	Comamonadaceae	.	Hydrogenophaga	.	0.51	Hydrogenophaga_defluvii_(T)_type_strain:_BSB_9.5_(AJ585993)	98.8	3	0	0	0	0	0	0	0	0	5.7346e-05	0	0	0
OTU_210	2	Root	Bacteria	Firmicutes	.	Clostridia	.	Clostridiales	.	Ruminococcaceae	.	Ercella	.	0.62	Ruminococcaceae_bacterium_ZWB_4_(HG003571)	92.9	1	0	0	0	0	2.17278e-05	0	0	0	2.8673e-05	0	0	0
OTU_222	2	Root	Bacteria	Cloacimonetes	.	.	.	.	.	.	.	Candidatus Cloacamonas	.	0.99	Candidatus_Cloacimonas_acidaminovorans_str._Evry_(CU466930)	91.7	1	4.66233e-05	0	0	0	0	0	0	0	0	0	0	0
OTU_200	2	Root	Bacteria	Firmicutes	.	Clostridia	.	Clostridiales	.	Lachnospiraceae	.	.	.	0.98	Clostridium_lavalense_(T)_CCRI-9842_(EF564277)	93.7	2	4.66233e-05	0	0	0	0	0	0	0	0	0	0	0
OTU_203	2	Root	Bacteria	Firmicutes	.	Clostridia	.	Thermoanaerobacterales	.	Thermoanaerobacteraceae	.	.	.	0.51	uncultured_soil_bacterium_PBS-III-27_(AJ390456)	86.2	2	0	0	0	0	4.34556e-05	0	0	0	0	0	0	0
OTU_198	2	Root	Bacteria	Proteobacteria	.	Gammaproteobacteria	.	Pseudomonadales	.	Moraxellaceae	.	Acinetobacter	.	1	Acinetobacter_indicus_(T)_A648_(HM047743)	100	1	0	0	0	0	0	0	0	0	5.7346e-05	0	0	0
OTU_197	2	Root	Bacteria	Chloroflexi	.	Anaerolineae	.	Anaerolineales	.	Anaerolineaceae	.	.	.	1	Ornatilinea_apprima_P3M-1_(JQ292916)	90.9	1	0	0	0	0	2.17278e-05	0	0	0	2.8673e-05	0	0	0
0	0	0	0	0	0	0	0	0	0	0	0	0	0	0	0	0	0	0	0	0	0	0	0	0	0	0	0	0	0

## Sheet: AESS-W1
																		42799	19600	7683	16895
																	0.98	32	32	16	15
																	0.99	48	39	17	15					Crosstalk?
OTU	Size	RDP classification													Species	Match%	Match#	W1 amplicon	W1 extended	W1 Spades	W1 Spades 16S		% in amplicon	cumulative		W2 amplicon	W3 amplicon	Max from all samples		W1 WGS coverage	WGS 'depth'		Kelpie	Spades	Spades 16S	Possible	Kelpie	Spades	Spades 16S
OTU_1	54743	Root	Bacteria	Proteobacteria		Deltaproteobacteria		Desulfuromonadales		Desulfuromonadaceae		Desulfuromonas		0.91	Desulfuromonas_acetexigens_(T)_(U23140)	96.8	1	27333	13574	5292	8544		0.638636	0.638636		132	1554	27497		100	8104		1	1	1	1	1	1	1
OTU_2	7818	Root	Archaea	Euryarchaeota		Methanomicrobia		Methanosarcinales		Methanosarcinaceae		Methanosarcina		1	Methanosarcina_siciliae_type_strain:_DSM3028_(FR733698)	100	7	1238	2733	1738	2109		0.0289259	0.667562		11	54	2085		100	1868		1	1	1	1	1	1	1
OTU_3	4323	Root	Bacteria	Proteobacteria		Epsilonproteobacteria		Campylobacterales		Campylobacteraceae		Sulfurospirillum		0.62	Sulfurospirillum_alkalitolerans_HTRB-L1_(GQ863490)	97.2	1	2340	508	0	1475		0.0546742	0.722237		41	31	14011		100	311		1	0	1	1	1	0.666667	1
OTU_4	4106	Root	Archaea	Euryarchaeota		Methanomicrobia		Methanomicrobiales		Methanomicrobiales_incertae_sedis		Methanocalculus		1	Methanocalculus_pumilus_(T)_MHT-1_(AB008853)	99.6	1	3312	476	0	318		0.077385	0.799621		30	29	10512		100	305		1	0	1	1	1	0.5	1
OTU_5	1874	Root	Bacteria	Bacteroidetes		Bacteroidia		Bacteroidales		Porphyromonadaceae				0.67	Parabacteroides_distasonis_(T)_JCM_5825_(AB238922)	85.8	1	1270	271	193	140		0.0296736	0.829295		9	3116	3129		100	175		1	1	1	1	1	0.6	1
OTU_7	1431	Root	Bacteria	Firmicutes		Clostridia		Clostridiales		Eubacteriaceae		Acetobacterium		1	Acetobacterium_malicum_(T)_DSM_4132_(X96957)	100	3	929	304	37	161		0.0217061	0.851001		16	153	2442		100	174		1	1	1	1	1	0.666667	1
OTU_6	1346	Root	Bacteria	Proteobacteria		Deltaproteobacteria								0.5	Thiohalocapsa_marina_(T)_type_strain:_JA142_(AM491592)	89.7	1	304	98	50	894		0.00710297	0.858104		-	5	305		100	64		1	1	1	1	1	0.714286	1
OTU_10	1317	Root	Bacteria	Chloroflexi		Anaerolineae		Anaerolineales		Anaerolineaceae		Ornatilinea		0.93	Ornatilinea_apprima_P3M-1_(JQ292916)	89.7	1	796	254	154	113		0.0185986	0.876703		4	8	799		100	123		1	1	1	1	1	0.75	1
OTU_9	1293	Root	Bacteria	Bacteroidetes		Bacteroidia		Bacteroidales						0.61	Porphyromonas_pogonae_strain_MI_10-1288_(NR_136443.1)	86.2	2	1059	128	45	61		0.0247436	0.901446		29	389	6717		100	77		1	1	1	1	1	0.777778	1
OTU_11	1224	Root	Archaea	Euryarchaeota		Methanomicrobia		Methanosarcinales		Methanotrichaceae		Methanothrix		1	Methanosaeta_harundinacea_(T)_8Ac_(AY817738)	97.2	1	1032	192	0	0		0.0241127	0.925559		16	3332	11703		100	120		1	0	0	1	1	0.7	0.9
OTU_8	1024	Root	Bacteria	Firmicutes		Clostridia		Clostridiales		Ruminococcaceae		Clostridium III		0.95	Clostridium_sufflavum_(T)_CDT-1_(AB267266)	97.2	3	13	14	0	997		0.000303745	0.925863		-	-	13		100	17		1	0	1	1	1	0.636364	0.909091
OTU_12	599	Root	Bacteria	Synergistetes		Synergistia		Synergistales		Synergistaceae		Aminivibrio		0.66	Aminivibrio_pyruvatiphilus_4F6E_(AB623229)	91.7	1	128	62	6	403		0.00299072	0.928853		-	-	128		100	32		1	1	1	1	1	0.666667	0.916667
OTU_13	599	Root	Bacteria	Synergistetes		Synergistia		Synergistales		Synergistaceae		Aminiphilus		1	Aminiphilus_circumscriptus_(T)_ILE-2_(AY642589)	99.6	1	205	82	53	259		0.00478983	0.933643		-	0	205		100	61		1	1	1	1	1	0.692308	0.923077
OTU_14	474	Root	Bacteria	Proteobacteria		Deltaproteobacteria		Syntrophobacterales		Syntrophobacteraceae		Syntrophobacter		1	Syntrophobacter_sulfatireducens_(T)_TB8106_(AY651787)	100	1	219	65	0	190		0.00511694	0.93876		17	254	255		100	39		1	0	1	1	1	0.642857	0.928571
OTU_15	408	Root	Archaea	Euryarchaeota		Methanomicrobia		Methanomicrobiales		Methanospirillaceae		Methanospirillum		1	Methanospirillum_hungatei_strain_JF-1_(NR_074177.1)	98.4	2	67	135	0	206		0.00156546	0.940326		-	-	465		100	90		1	0	1	1	1	0.6	0.933333
OTU_16	394	Root	Bacteria	Firmicutes		Clostridia		Clostridiales		Clostridiales_Incertae Sedis XI				0.77	Dethiosulfatibacter_aminovorans_(T)_C/G2_(=_JCM_13356,_=_NBRC_101112,_=_DSM_17477)_(AB218661)	94.8	1	230	115	0	49		0.00537396	0.9457		-	4	231		100	53		1	0	1	1	1	0.5625	0.9375
OTU_24	379	Root	Bacteria	Proteobacteria		Deltaproteobacteria		Syntrophobacterales		Syntrophaceae		Smithella		1	Smithella_propionica_(T)_LYP_(AF126282)	96.8	1	77	33	0	269		0.00179911	0.947499		220	108	577		100	21		1	0	1	1	1	0.529412	0.941176
OTU_18	272	Root	Bacteria	Firmicutes		Clostridia		Clostridiales		Ruminococcaceae		Ercella		0.83	Ruminococcaceae_bacterium_ZWB_4_(HG003571)	96	1	169	47	31	25		0.00394869	0.951447		-	46	245		100	38		1	1	1	1	1	0.555556	0.944444
OTU_17	268	Root	Bacteria	Proteobacteria		Deltaproteobacteria		Desulfovibrionales		Desulfovibrionaceae		Desulfovibrio		1	Desulfovibrio_alkalitolerans_(T)_RT2_(AY649785)	99.2	1	108	23	8	129		0.00252342	0.953971		4	429	762		100	19		1	1	1	1	1	0.578947	0.947368
OTU_20	233	Root	Bacteria	Bacteroidetes										1	Marivirga_sericea_(T)_IFO_15983_(AB078081)	87	3	125	58	9	41		0.00292063	0.956892		8	-	257		100	35		1	1	1	1	1	0.6	0.95
OTU_21	231	Root	Bacteria											0.94	*	0	1	161	70	0	0		0.00376177	0.960653		-	-	-		100	40		1	0	0	1	1	0.571429	0.904762
OTU_19	226	Root	Bacteria	Proteobacteria		Deltaproteobacteria		Desulfovibrionales		Desulfomicrobiaceae		Desulfomicrobium		1	Desulfomicrobium_salsuginis_strain_ADR21_(NR_132593.1)	98.8	2	25	8	0	193		0.000584126	0.961237		-	-	-		100	6		1	0	1	1	1	0.545455	0.909091
OTU_23	208	Root	Bacteria	Bacteroidetes		Bacteroidia		Bacteroidales		Porphyromonadaceae		Acetobacteroides		0.54	Olivibacter_sitiensis_(T)_AW-6_(DQ421387)	86.2	1	175	33	0	0		0.00408888	0.965326		-	4	611		100	38		1	0	0	1	1	0.521739	0.869565
OTU_22	201	Root	Bacteria	Bacteroidetes		Bacteroidia		Bacteroidales		Porphyromonadaceae		Petrimonas		1	Petrimonas_sulfuriphila_(T)_BN3_(AY570690)	100	1	104	16	16	65		0.00242996	0.967756		-	-	465		100	10		1	1	1	1	1	0.541667	0.875
OTU_27	143	Root	Bacteria	Chloroflexi		Anaerolineae		Anaerolineales		Anaerolineaceae		Ornatilinea		1	Ornatilinea_apprima_P3M-1_(JQ292916)	99.6	1	109	34	0	0		0.00254679	0.970303		4	8	799		100	31		1	0	0	1	1	0.52	0.84
OTU_26	134	Root	Bacteria	Bacteroidetes		Bacteroidia		Bacteroidales		Prolixibacteraceae				0.87	Sunxiuqinia_faeciviva_(T)_JAM-BA0302_(AB362263)	91.7	1	53	13	15	53		0.00123835	0.971541		112	119	1118		100	15		1	1	1	1	1	0.538462	0.846154
OTU_25	129	Root	Bacteria	Firmicutes		Clostridia		Clostridiales						0.69	Paenibacillus_phyllosphaerae_(T)_PALXIL04_(AY598818)	88.5	1	0	0	0	129		0	0.971541		-	-	-		91	19		0	0	0	0	1	0.538462	0.814815
OTU_28	109	Root	Bacteria	Bacteroidetes										0.96	Crocinitomix_catalasitica_(T)_IFO_15977_(AB078042)	88.1	4	38	37	6	28		0.000887871	0.972429		-	-	242		100	10		1	1	1	1	1	0.555556	0.821429
OTU_29	104	Root	Bacteria	Proteobacteria		Betaproteobacteria		Rhodocyclales		Rhodocyclaceae		Thauera		0.98	Azoarcus_olearius_DQS-4_(EF158388)	99.2	1	71	18	15	0		0.00165892	0.974088		10	13	7416		100	19		1	1	0	1	1	0.571429	0.793103
OTU_30	91	Root	Bacteria	Proteobacteria		Deltaproteobacteria		Syntrophobacterales		Syntrophaceae		Smithella		0.58	Smithella_propionica_(T)_LYP_(AF126282)	92.5	2	59	32	0	0		0.00137854	0.975467		220	108	577		100	19		1	0	0	1	1	0.551724	0.766667
OTU_31	86	Root	Bacteria	Firmicutes		Clostridia		Clostridiales		Syntrophomonadaceae		Syntrophomonas		1	Syntrophomonas_bryantii_type_strain:_DSM_3014_(HE654006)	96.8	1	53	21	0	12		0.00123835	0.976705		4	61	439		100	12		1	0	1	1	1	0.533333	0.774194
OTU_33	78	Root	Bacteria	Proteobacteria		Deltaproteobacteria		Syntrophobacterales		Syntrophaceae		Syntrophus		0.75	Smithella_propionica_(T)_LYP_(AF126282)	95.3	1	54	24	0	0		0.00126171	0.977967		220	108	577		100	12		1	0	0	1	1	0.516129	0.75
OTU_32	78	Root	Bacteria	Firmicutes		Clostridia		Clostridiales						0.73	*	0	1	43	35	0	0		0.0010047	0.978971		-	-	-		100	22		1	0	0	1	1	0.5	0.727273
OTU_94	65	Root	Bacteria	Synergistetes		Synergistia		Synergistales		Synergistaceae		Aminivibrio		0.89	Aminivibrio_pyruvatiphilus_4F6E_(AB623229)	91.7	1	60	5	0	0		0.0014019	0.980373		-	-	128		93	24		1	0	0	1	1	0.484848	0.705882
OTU_35	51	Root	Bacteria	Actinobacteria		Actinobacteria	Coriobacteridae	Coriobacteriales	Coriobacterineae	Coriobacteriaceae				0.59	Atopobium_vaginae_(T)_CCUG_38953_(Y17195)	88.5	1	51	0	0	0		0.00119162	0.981565		14	14	9732		47	6		0	0	0	0	1	0.484848	0.685714
OTU_34	46	Root	Bacteria	Firmicutes		Clostridia		Clostridiales						0.94	Clostridium_putrificum_(T)_DSM_1734_(X73442)	92.1	1	23	23	0	0		0.000537396	0.982102		4	-	469		100	21		1	0	0	1	1	0.470588	0.666667
OTU_37	45	Root	Bacteria	Proteobacteria		Alphaproteobacteria		Rhizobiales						0.63	Pedomicrobium_manganicum_(T)_ATCC_33121_(GU269549)	92.1	3	20	11	0	14		0.000467301	0.98257		-	-	137		100	8		1	0	1	1	1	0.457143	0.675676
OTU_39	41	Root	Bacteria	Firmicutes		Clostridia		Clostridiales		Ruminococcaceae		Clostridium III		0.54	Clostridium_hungatei_(T)_AD;_ATCC_700212_(AF020429)	94.9	2	32	9	0	0		0.000747681	0.983317		5	1124	1132		100	8		1	0	0	1	1	0.444444	0.657895
OTU_43	33	Root	Bacteria	Bacteroidetes		Bacteroidia		Bacteroidales		Porphyromonadaceae		Proteiniphilum		0.88	Proteiniphilum_acetatigenes_(T)_TB107_(AY742226)	98	1	27	6	0	0		0.000630856	0.983948		4	7	2600		100	5		1	0	0	1	1	0.432432	0.641026
OTU_45	30	Root	Bacteria	Bacteroidetes										0.99	Alkalitalea_saponilacus_(T)_SC/BZ-SP2_(HQ191474)	88.9	2	30	0	0	0		0.000700951	0.984649		-	-	31		97	3		0	0	0	1	0.973684	0.421053	0.625411
OTU_40	29	Root	Bacteria	Bacteroidetes		Bacteroidia		Bacteroidales		Porphyromonadaceae		Petrimonas		0.95	Lascolabacillus_massiliensis_strain_SIT8_(NR_144720.1)	97.2	1	29	0	0	0		0.000677586	0.985327		-	4	1018		75	3		0	0	0	0	0.973684	0.421053	0.61054
OTU_41	29	Root	Bacteria	Proteobacteria		Deltaproteobacteria		Desulfovibrionales		Desulfovibrionaceae		Desulfovibrio		1	Desulfovibrio_oxamicus_(T)_DSM_1925_(DQ122124)	99.6	1	19	10	0	0		0.000443936	0.985771		-	860	866		100	4		1	0	0	1	0.974359	0.410256	0.596349
OTU_42	28	Root	Bacteria	Proteobacteria		Deltaproteobacteria				Syntrophorhabdaceae		Syntrophorhabdus		1	Syntrophorhabdus_aromaticivorans_(T)_UI_(AB212873)	97.2	1	25	3	0	0		0.000584126	0.986355		52	82	1516		100	6		1	0	0	1	0.975	0.4	0.582795
OTU_36	28	Root	Bacteria	Spirochaetes		Spirochaetia		Spirochaetales		Spirochaetaceae		Sphaerochaeta		1	Sphaerochaeta_globus_str._Buddy_(AF357916)	98.8	1	0	20	8	0		0	0.986355		-	-	-		100	13		0	0	0	0	0.975	0.4	0.569843
OTU_38	27	Root	Archaea	Euryarchaeota		Methanobacteria		Methanobacteriales						0.53	Methanobrevibacter_boviskoreani_JH1_(KC608769)	85.8	1	23	0	4	0		0.000537396	0.986892		-	-	24		100	6		0	1	0	1	0.95122	0.414634	0.55775
OTU_53	25	Root	Bacteria	Firmicutes		Clostridia		Clostridiales						0.97	Clostridium_acetireducens_(T)_30A_(X79862)	93.7	2	25	0	0	0		0.000584126	0.987476		-	-	25		100	17		0	0	0	1	0.928571	0.404762	0.54643
OTU_44	24	Root	Bacteria											0.99	Thermodesulfovibrio_aggregans_(T)_TGE-P1_(AB021302)	87	1	24	0	0	0		0.000560761	0.988037		17120	10	17201		84	2		0	0	0	0	0.928571	0.404762	0.53556
OTU_64	18	Root	Bacteria	Proteobacteria		Gammaproteobacteria		Pseudomonadales		Pseudomonadaceae		Pseudomonas		0.88	Pseudomonas_aestusnigri_CCUG_64165;_VGXO14_(HG004394)	98.4	1	18	0	0	0		0.000420571	0.988458		4	-	4692		16	1		0	0	0	0	0.928571	0.404762	0.525115
OTU_47	18	Root	Bacteria	Firmicutes		Clostridia		Clostridiales		Eubacteriaceae		Alkalibacter		1	Alkalibacter_saccharofermentans_(T)_Z-79820_(AY312403)	100	1	18	0	0	0		0.000420571	0.988878		9	6	2300		29	52		0	0	0	0	0.928571	0.404762	0.515069
OTU_49	18	Root	Bacteria	Firmicutes		Clostridia		Clostridiales						0.84	Gracilibacter_thermotolerans_(T)_JW/YJL-S1_(DQ117465)	90.5	1	18	0	0	0		0.000420571	0.989299		-	14	276		100	12		0	0	0	1	0.906977	0.395349	0.50562
OTU_46	17	Root	Bacteria	Firmicutes		Clostridia		Clostridiales						0.81	Caldicoprobacter_guelmensis_(T)_D2C22_(JQ707908)	91.3	2	17	0	0	0		0.000397206	0.989696		-	477	780		97	15		0	0	0	1	0.886364	0.386364	0.496716
OTU_55	16	Root	Bacteria	Bacteroidetes		Bacteroidia		Bacteroidales		Prolixibacteraceae				0.67	Mariniphaga_sediminis_strain_SY21_(NR_137221.1)	91.3	1	16	0	0	0		0.000373841	0.99007		-	-	164		77	4		0	0	0	0	0.886364	0.386364	0.48812
OTU_52	15	Root	Bacteria	Bacteroidetes										0.98	Lutaonella_thermophila_(T)_CC-MHSW-2_(EU287913)	86.6	1	15	0	0	0		0.000350475	0.99042		5	5	1251		35	6		0	0	0	0	0.886364	0.386364	0.479816
OTU_54	15	Root	Bacteria	Firmicutes		Clostridia		Natranaerobiales		Natranaerobiaceae		Dethiobacter		0.58	Dethiobacter_alkaliphilus_(T)_AHT_1_(EF422412)	89.7	1	15	0	0	0		0.000350475	0.990771		102	0	3869		4	3		0	0	0	0	0.886364	0.386364	0.47179
OTU_58	14	Root	Bacteria	Proteobacteria		Gammaproteobacteria		Chromatiales						0.56	Spiribacter_salinus_M19-40_(CP005963)	92.9	2	14	0	0	0		0.00032711	0.991098		5	4	5401		0	0		0	0	0	0	0.886364	0.386364	0.464028
OTU_48	14	Root	Bacteria	Verrucomicrobia		Verrucomicrobiae		Verrucomicrobiales		Verrucomicrobiaceae		Akkermansia		1	Akkermansia_muciniphila_(T)_Muc_(AY271254)	100	1	14	0	0	0		0.00032711	0.991425		-	-	17		0	0		0	0	0	0	0.886364	0.386364	0.456518
OTU_50	14	Root	Bacteria	Proteobacteria		Alphaproteobacteria		Rhodospirillales		Rhodospirillaceae				0.67	Magnetospira_thiophila_(T)_MMS-1_(EU861390)	90.1	1	6	0	0	8		0.00014019	0.991565		5	290	469		100	5		0	0	1	1	0.866667	0.377778	0.467382
OTU_61	13	Root	Bacteria	Bacteroidetes										0.99	Pedobacter_sp._MIC2002_(JX978785)	87	1	13	0	0	0		0.000303745	0.991869		18	4	4137		4	77		0	0	0	0	0.866667	0.377778	0.460212
OTU_51	13	Root	Bacteria	Spirochaetes		Spirochaetia		Spirochaetales		Spirochaetaceae		Treponema		1	Treponema_caldarium_(T)_DSMZ7334_(EU580141)	96	1	8	0	3	2		0.00018692	0.992056		-	-	34		100	3		0	1	1	1	0.847826	0.391304	0.470846
OTU_63	13	Root	Bacteria	Spirochaetes		Spirochaetia		Spirochaetales		Spirochaetaceae				0.57	Treponema_zuelzerae_(T)_type_strain:_DSM_1903;_2_(FR749929)	85.8	1	13	0	0	0		0.000303745	0.99236		1171	5956	5986		0	0		0	0	0	0	0.847826	0.391304	0.463986
OTU_81	12	Root	Bacteria	Firmicutes		Clostridia		Clostridiales		Clostridiaceae 2		Natronincola		0.87	Natronincola_peptidivorans_(T)_Z-7031_(EF382661)	99.2	1	12	0	0	0		0.00028038	0.99264		-	1293	1299		64	17		0	0	0	0	0.847826	0.391304	0.457323
OTU_66	11	Root	Bacteria	Firmicutes		Clostridia		Clostridiales		Syntrophomonadaceae		Syntrophomonas		0.98	Syntrophomonas_zehnderi_(T)_OL-4_(DQ898277)	95.3	1	11	0	0	0		0.000257015	0.992897		9	2	1108		100	5		0	0	0	1	0.829787	0.382979	0.450985
OTU_113	11	Root	Bacteria	Actinobacteria		Actinobacteria	Coriobacteridae	Coriobacteriales	Coriobacterineae	Coriobacteriaceae				0.56	Olegusella_massiliensis_strain_KHD7_(NR_146815.1)	89.3	1	11	0	0	0		0.000257015	0.993154		20	5	3418		51	6		0	0	0	0	0.829787	0.382979	0.44482
OTU_69	11	Root	Bacteria	Firmicutes										0.55	Anaerobacterium_chartisolvens_T-1-35_(AB793710)	86.6	3	11	0	0	0		0.000257015	0.993411		9	-	1254		66	1		0	0	0	0	0.829787	0.382979	0.438821
OTU_67	11	Root	Bacteria	Actinobacteria		Actinobacteria	Rubrobacteridae							0.56	Streptomyces_aomiensis_(T)_M24DS04_(AB522686)	89.3	3	11	0	0	0		0.000257015	0.993668		-	8	18		100	2		0	0	0	1	0.8125	0.375	0.433101
OTU_59	10	Root	Archaea	Euryarchaeota		Methanobacteria		Methanobacteriales		Methanobacteriaceae		Methanobacterium		1	Methanobacterium_formicicum_(T)_DSM_1535_(AF169245)	99.6	1	10	0	0	0		0.00023365	0.993902		18	33	22906		0	0		0	0	0	0	0.8125	0.375	0.427529
OTU_56	10	Root	Bacteria	Firmicutes										0.96	Bacillaceae_bacterium_13CC_(JN571119)	90.9	1	10	0	0	0		0.00023365	0.994135		10	7	3140		26	56		0	0	0	0	0.8125	0.375	0.422099
OTU_68	9	Root	Bacteria	Proteobacteria		Deltaproteobacteria		Syntrophobacterales		Syntrophaceae				0.97	Smithella_propionica_(T)_LYP_(AF126282)	94.5	1	9	0	0	0		0.000210285	0.994346		220	108	577		99	5		0	0	0	1	0.795918	0.367347	0.416911
OTU_80	9	Root	Bacteria	Bacteroidetes										0.99	Cytophaga_fermentans_(T)_ATCC_19072_(M58766)	87.7	1	9	0	0	0		0.000210285	0.994556		5845	7	5880		2	102		0	0	0	0	0.795918	0.367347	0.41185
OTU_62	9	Root	Bacteria	Firmicutes		Clostridia		Clostridiales		Ruminococcaceae				0.5	Thermincola_carboxydiphila_(T)_2204_(AY603000)	89.3	1	9	0	0	0		0.000210285	0.994766		10	14	5160		39	27		0	0	0	0	0.795918	0.367347	0.40691
OTU_77	8	Root	Bacteria	Firmicutes										0.72	Gelria_glutamica_(T)_TGO_(AF321086)	87.4	1	8	0	0	0		0.00018692	0.994953		4	10	905		97	7		0	0	0	1	0.78	0.36	0.402182
OTU_60	8	Root	Bacteria	Firmicutes		Clostridia		Clostridiales						0.99	Christensenella_minuta_YIT_12065_(AB490809)	93.3	1	8	0	0	0		0.00018692	0.99514		-	-	39		20	4		0	0	0	0	0.78	0.36	0.397563
OTU_57	8	Root	Bacteria	Proteobacteria		Alphaproteobacteria		Sphingomonadales		Sphingomonadaceae		Sphingomonas		1	Sphingomonas_ginsenosidimutans_(T)_Gsoil_1429_(HM204925)	100	1	0	0	0	8		0	0.99514		-	0	-		100	11		0	0	0	0	0.78	0.36	0.393048
OTU_70	7	Root	Bacteria	Proteobacteria		Deltaproteobacteria				Syntrophorhabdaceae		Syntrophorhabdus		0.99	Syntrophorhabdus_aromaticivorans_(T)_UI_(AB212873)	94.9	1	7	0	0	0		0.000163555	0.995304		52	82	1516		99	3		0	0	0	1	0.764706	0.352941	0.388721
OTU_65	7	Root	Bacteria	Bacteroidetes		Bacteroidia		Bacteroidales		Porphyromonadaceae		Petrimonas		0.88	Petrimonas_sulfuriphila_(T)_BN3_(AY570690)	95.3	1	7	0	0	0		0.000163555	0.995467		-	-	465		78	2		0	0	0	0	0.764706	0.352941	0.384488
OTU_71	7	Root	Bacteria	Firmicutes		Clostridia		Clostridiales		Clostridiaceae 2		Anoxynatronum		0.58	Anoxynatronum_sibiricum_(T)_Z-7981_(AF522323)	99.2	1	7	0	0	0		0.000163555	0.995631		-	-	188		76	25		0	0	0	0	0.764706	0.352941	0.380346
OTU_111	7	Root	Bacteria	Proteobacteria		Deltaproteobacteria		Desulfovibrionales		Desulfovibrionaceae		Desulfovibrio		1	Desulfovibrio_psychrotolerans_(T)_type_strain:_PWC_=_JS1_(AM418397)	98.8	1	7	0	0	0		0.000163555	0.995794		-	-	274		35	2		0	0	0	0	0.764706	0.352941	0.376293
OTU_90	6	Root	Bacteria	Ignavibacteriae		Ignavibacteria		Ignavibacteriales		Ignavibacteriaceae		Melioribacter		0.81	Melioribacter_roseus_P3M-2_(JQ292917)	95.7	1	6	0	0	0		0.00014019	0.995934		5	4	1015		12	1		0	0	0	0	0.764706	0.352941	0.372325
OTU_86	6	Root	Bacteria	Firmicutes		Clostridia		Clostridiales		Clostridiaceae 2		Alkaliphilus		1	Alkaliphilus_crotonatoxidans_(T)_B11-2_(AF467248)	100	2	6	0	0	0		0.00014019	0.996075		-	-	505		30	42		0	0	0	0	0.764706	0.352941	0.368439
OTU_88	6	Root	Bacteria	Firmicutes		Clostridia		Thermoanaerobacterales		Thermoanaerobacteraceae				0.64	Syntrophaceticus_schinkii_(T)_Sp3_(EU386162)	90.5	1	6	0	0	0		0.00014019	0.996215		2871	7	2892		33	17		0	0	0	0	0.764706	0.352941	0.364634
OTU_75	6	Root	Archaea	Euryarchaeota		Methanobacteria		Methanobacteriales		Methanobacteriaceae		Methanobacterium		1	Methanobacterium_subterraneum_(T)_A8p,_DSM_11074_(X99044)	100	1	6	0	0	0		0.00014019	0.996355		29	7736	7783		0	0		0	0	0	0	0.764706	0.352941	0.360907
OTU_73	6	Root	Bacteria	Firmicutes		Negativicutes		Selenomonadales		Veillonellaceae				0.84	Thermosinus_carboxydivorans_strain_DSM_14886_(NR_117166.1)	89.3	4	6	0	0	0		0.00014019	0.996495		-	-	-		64	1		0	0	0	0	0.764706	0.352941	0.357255
OTU_115	6	Root	Bacteria	Proteobacteria		Gammaproteobacteria		Pseudomonadales		Pseudomonadaceae		Pseudomonas		0.99	Pseudomonas_songnenensis_strain_NEAU-ST5-5_(NR_148295.1)	100	2	6	0	0	0		0.00014019	0.996635		-	138	1109		56	1		0	0	0	0	0.764706	0.352941	0.353677
OTU_78	6	Root	Bacteria	Firmicutes		Clostridia		Thermoanaerobacterales		Thermoanaerobacteraceae				0.8	Thermoanaerobacter_thermocopriae_(T)_JT-3T_(L09167)	91.7	3	6	0	0	0		0.00014019	0.996776		-	-	624		28	19		0	0	0	0	0.764706	0.352941	0.350169
OTU_76	6	Root	Bacteria	Firmicutes		Clostridia		Clostridiales		Syntrophomonadaceae				1	Pelospora_glutarica_(T)_WoGl3_(AJ251214)	95.7	1	6	0	0	0		0.00014019	0.996916		-	11	1842		10	8		0	0	0	0	0.764706	0.352941	0.34673
OTU_118	5	Root	Bacteria	Proteobacteria		Alphaproteobacteria		Rhodobacterales		Rhodobacteraceae				1	Paracoccus_aestuarii_(T)_B7_(EF660757)	99.2	7	5	0	0	0		0.000116825	0.997033		4	3	1524		22	1		0	0	0	0	0.764706	0.352941	0.343359
OTU_74	5	Root	Bacteria	Bacteroidetes		Bacteroidia		Bacteroidales						0.72	Porphyromonas_pogonae_strain_MI_10-1288_(NR_136443.1)	86.2	1	5	0	0	0		0.000116825	0.997149		29	389	6717		48	15		0	0	0	0	0.764706	0.352941	0.340052
OTU_72	5	Root	Bacteria	Bacteroidetes		Bacteroidia		Bacteroidales		Porphyromonadaceae				0.97	Muribaculum_intestinale_strain_YL27_(NR_144616.1)	93.7	1	5	0	0	0		0.000116825	0.997266		6	5	6		2	70		0	0	0	0	0.764706	0.352941	0.336808
OTU_84	5	Root	Bacteria	Proteobacteria		Alphaproteobacteria		Rhizobiales		Rhodobiaceae		Parvibaculum		1	Parvibaculum_lavamentivorans_(T)_DS-1_(AY387398)	100	1	5	0	0	0		0.000116825	0.997383		7	-	3448		3	6		0	0	0	0	0.764706	0.352941	0.333625
OTU_87	5	Root	Bacteria	Bacteroidetes		Bacteroidia		Bacteroidales		Porphyromonadaceae				0.85	Muribaculum_intestinale_strain_YL27_(NR_144616.1)	89.7	1	5	0	0	0		0.000116825	0.9975		6	5	6		0	0		0	0	0	0	0.764706	0.352941	0.330502
OTU_83	5	Root	Bacteria	Proteobacteria		Deltaproteobacteria		Desulfuromonadales		Desulfuromonadaceae		Desulfuromonas		0.95	Desulfuromonas_thiophila_(T)_NZ27_(DSMZ_8987)_(Y11560)	96.4	2	5	0	0	0		0.000116825	0.997617		-	-	30		28	1		0	0	0	0	0.764706	0.352941	0.327437
OTU_79	5	Root	Bacteria	Firmicutes		Clostridia		Clostridiales						1	Natranaerovirga_pectinivora_(T)_AP3_(GQ922846)	94.9	1	5	0	0	0		0.000116825	0.997734		6	5	932		52	24		0	0	0	0	0.764706	0.352941	0.324429
OTU_89	5	Root	Bacteria	Firmicutes		Clostridia								0.58	Thermacetogenium_phaeum_(T)_PB_(AB020336)	87	1	5	0	0	0		0.000116825	0.99785		14	3285	3303		13	67		0	0	0	0	0.764706	0.352941	0.321475
OTU_96	5	Root	Bacteria	Firmicutes		Clostridia		Clostridiales						0.85	Clostridium_hungatei_(T)_AD;_ATCC_700212_(AF020429)	91.3	1	5	0	0	0		0.000116825	0.997967		5	1124	1132		9	103		0	0	0	0	0.764706	0.352941	0.318574
OTU_95	5	Root	Bacteria	Bacteroidetes		Bacteroidia		Bacteroidales		Porphyromonadaceae				0.5	Pontibacter_sp._JC215_A10_(HG008901)	85.8	1	5	0	0	0		0.000116825	0.998084		-	931	943		99	7		0	0	0	1	0.75	0.346154	0.31578
OTU_100	5	Root	Bacteria	Bacteroidetes										1	Sunxiuqinia_faeciviva_(T)_JAM-BA0302_(AB362263)	85.8	1	5	0	0	0		0.000116825	0.998201		112	119	1118		0	0		0	0	0	0	0.75	0.346154	0.313034
OTU_109	4	Root	Bacteria	Firmicutes		Clostridia		Clostridiales						0.69	Moorella_humiferrea_(T)_64_FGQ_(GQ872425)	92.9	1	4	0	0	0		9.34601e-05	0.998294		129	-	128		44	2		0	0	0	0	0.75	0.346154	0.310335
OTU_107	4	Root	Bacteria											0.99	Aminobacterium_colombiense_strain_DSM_12261_(NR_074624.1)	85.8	2	4	0	0	0		9.34601e-05	0.998388		2	-	369		0	0		0	0	0	0	0.75	0.346154	0.307683
OTU_82	4	Root	Bacteria	Proteobacteria		Gammaproteobacteria		Enterobacteriales		Enterobacteriaceae		Citrobacter		0.59	Citrobacter_sedlakii_(T)_CDC_4696-86_(AF025364)	100	4	4	0	0	0		9.34601e-05	0.998481		-	-	93		85	3		0	0	0	0	0.75	0.346154	0.305076
OTU_93	4	Root	Bacteria	Proteobacteria		Deltaproteobacteria		Desulfuromonadales		Geobacteraceae		Geoalkalibacter		0.94	Geoalkalibacter_ferrihydriticus_(T)_Z-0531_(DQ309326)	96.8	1	4	0	0	0		9.34601e-05	0.998575		-	61	523		10	1		0	0	0	0	0.75	0.346154	0.302512
OTU_91	4	Root	Bacteria	Firmicutes		Clostridia		Clostridiales		Ruminococcaceae		Ercella		1	Ruminococcaceae_bacterium_ZWB_4_(HG003571)	100	1	4	0	0	0		9.34601e-05	0.998668		-	46	245		91	19		0	0	0	1	0.735849	0.339623	0.300038
OTU_105	4	Root	Bacteria											1	uncultured_candidate_division_BRC1_bacterium_LD1-PA21_(AY114315)	89.3	1	4	0	0	0		9.34601e-05	0.998762		-	-	114		64	1		0	0	0	0	0.735849	0.339623	0.297605
OTU_119	4	Root	Bacteria	Firmicutes		Clostridia		Clostridiales		Clostridiales_Incertae Sedis XI		Tissierella		0.61	Soehngenia_saccharolytica_(T)_BOR-Y_(AY353956)	96.8	1	4	0	0	0		9.34601e-05	0.998855		2	4	767		3	2		0	0	0	0	0.735849	0.339623	0.29521
OTU_104	4	Root	Bacteria	Firmicutes		Clostridia		Clostridiales		Peptococcaceae 2		Pelotomaculum		0.95	Pelotomaculum_propionicicum_(T)_MGP_(AB154390)	99.2	1	4	0	0	0		9.34601e-05	0.998949		188	-	1186		7	4		0	0	0	0	0.735849	0.339623	0.292854
OTU_116	3	Root	Archaea	Euryarchaeota		Methanomicrobia		Methanomicrobiales		Methanoregulaceae		Methanoregula		1	Methanoregula_formicica_(T)_SMSP_(AB479390)	99.6	1	3	0	0	0		7.00951e-05	0.999019		-	-	3		96	3		0	0	0	1	0.722222	0.333333	0.290578
OTU_85	3	Root	Bacteria	Firmicutes										0.59	*	0	1	3	0	0	0		7.00951e-05	0.999089		-	-	-		11	1		0	0	0	0	0.722222	0.333333	0.288337
OTU_92	3	Root	Bacteria	Spirochaetes		Spirochaetia		Spirochaetales		Spirochaetaceae		Spirochaeta		0.81	Spirochaeta_bajacaliforniensis_(T)_type_strain_DSM_16054_(AJ698859)	89.7	1	3	0	0	0		7.00951e-05	0.999159		-	-	-		21	2		0	0	0	0	0.722222	0.333333	0.28613
OTU_117	3	Root	Bacteria											1	candidate_division_OP1_clone_OPB14_(AF027045)	89.7	1	3	0	0	0		7.00951e-05	0.999229		4057	6	4081		6	1		0	0	0	0	0.722222	0.333333	0.283957
OTU_103	3	Root	Bacteria	Acidobacteria		Acidobacteria_Gp23						Gp23		0.65	uncultured_bacterium_FW34_(AF523981)	96	1	3	0	0	0		7.00951e-05	0.999299		-	-	7		45	1		0	0	0	0	0.722222	0.333333	0.281816
OTU_122	3	Root	Bacteria	Chloroflexi		Anaerolineae		Anaerolineales		Anaerolineaceae				0.8	*	0	1	3	0	0	0		7.00951e-05	0.999369		-	-	-		85	2		0	0	0	0	0.722222	0.333333	0.279708
OTU_108	3	Root	Archaea	Euryarchaeota		Methanomicrobia		Methanomicrobiales		Methanomicrobiaceae		Methanofollis		1	Methanofollis_tationis_(T)_DSM_2702_(AF095272)	99.6	2	3	0	0	0		7.00951e-05	0.999439		-	-	316		0	0		0	0	0	0	0.722222	0.333333	0.27763
OTU_102	3	Root	Bacteria	Acidobacteria		Acidobacteria_Gp23						Thermoanaerobaculum		0.56	uncultured_bacterium_FW34_(AF523981)	94.5	1	3	0	0	0		7.00951e-05	0.999509		-	-	7		61	1		0	0	0	0	0.722222	0.333333	0.275584
OTU_98	3	Root	Bacteria	Firmicutes										0.51	Calditerricola_yamamurae_(T)_YMO722_(AB308475)	86.6	2	3	0	0	0		7.00951e-05	0.999579		-	-	484		0	0		0	0	0	0	0.722222	0.333333	0.273567
OTU_97	2	Root	Bacteria	Firmicutes		Clostridia		Clostridiales		Lachnospiraceae				0.98	Clostridium_lavalense_(T)_CCRI-9842_(EF564277)	93.7	2	2	0	0	0		4.67301e-05	0.999626		-	-	2		21	40		0	0	0	0	0.722222	0.333333	0.27158
OTU_112	2	Root	Bacteria	Firmicutes		Clostridia		Clostridiales		Ruminococcaceae		Saccharofermentans		0.93	Saccharofermentans_acetigenes_(T)_P6_(AY949857)	95.3	1	2	0	0	0		4.67301e-05	0.999673		-	-	293		11	29		0	0	0	0	0.722222	0.333333	0.269621
OTU_101	2	Root	Bacteria	Chloroflexi		Anaerolineae		Anaerolineales		Anaerolineaceae				0.95	Thermanaerothrix_daxensis_strain_GNS-1_(NR_117865.1)	85.4	1	2	0	0	0		4.67301e-05	0.99972		70	-	54		62	1		0	0	0	0	0.722222	0.333333	0.267691
OTU_114	2	Root	Bacteria	Proteobacteria		Deltaproteobacteria		Syntrophobacterales		Syntrophaceae		Smithella		0.93	Smithella_propionica_(T)_LYP_(AF126282)	92.9	1	2	0	0	0		4.67301e-05	0.999766		220	108	577		3	35		0	0	0	0	0.722222	0.333333	0.265787
OTU_99	2	Root	Bacteria	Cloacimonetes								Candidatus Cloacamonas		0.99	Candidatus_Cloacimonas_acidaminovorans_str._Evry_(CU466930)	91.7	1	2	0	0	0		4.67301e-05	0.999813		-	-	609		0	0		0	0	0	0	0.722222	0.333333	0.263911
OTU_106	2	Root	Bacteria	Nitrospirae		Nitrospira		Nitrospirales		Nitrospiraceae		Thermodesulfovibrio		1	Thermodesulfovibrio_aggregans_(T)_TGE-P1_(AB021302)	96.4	1	2	0	0	0		4.67301e-05	0.99986		17120	10	17201		0	0		0	0	0	0	0.722222	0.333333	0.262061
OTU_121	2	Root	Bacteria	Firmicutes		Clostridia		Clostridiales		Peptococcaceae 1				0.94	Dehalobacter_restrictus_(T)_PER-K23_(U84497)	95.6	1	2	0	0	0		4.67301e-05	0.999907		-	-	23		65	20		0	0	0	0	0.722222	0.333333	0.260237
OTU_120	2	Root	Bacteria	Proteobacteria		Alphaproteobacteria		Rhizobiales		Phyllobacteriaceae				0.93	Mesorhizobium_camelthorni_(T)_CCNWXJ40-4_(EU169581)	99.6	1	2	0	0	0		4.67301e-05	0.999953		2	-	1137		23	1		0	0	0	0	0.722222	0.333333	0.258438
OTU_110	2	Root	Bacteria	Bacteroidetes		Bacteroidia		Bacteroidales		Porphyromonadaceae				0.97	Muribaculum_intestinale_strain_YL27_(NR_144616.1)	91.7	1	2	0	0	0		4.67301e-05	1		6	5	6		2	70		0	0	0	0	0.722222	0.333333	0.256664

## Sheet: AESS-W2
																		45930	15848	3482	3502
																	0.98	24	24	14	12
																	0.99	34	30	15	12					Crosstalk?
OTU	Size	RDP classification													Species	Match%	Match#	W2 amplicon	W2 extended	W2 Spades	W2 Spades 16S		% in amplicon	cumulative		W1 amplicon	W3 amplicon	Max from all samples		W2 WGS coverage	WGS 'depth'		Kelpie	Spades	Spades 16S	Possible	Kelpie	Spades	Spades 16S
OTU_1	24936	Root	Bacteria											0.99	Thermodesulfovibrio_aggregans_(T)_TGE-P1_(AB021302)	87	1	17120	7816	0	0		0.372741	0.372741		24	10	17201		100	4891		1	0	0	1	1	0	0
OTU_2	8373	Root	Bacteria	Bacteroidetes										0.99	Cytophaga_fermentans_(T)_ATCC_19072_(M58766)	87.7	1	5845	1220	766	542		0.127259	0.5		9	7	5880		100	794		1	1	1	1	1	0.5	0.5
OTU_3	5610	Root	Bacteria											1	candidate_division_OP1_clone_OPB14_(AF027045)	89.7	1	4057	771	424	358		0.0883301	0.58833		3	6	4081		100	515		1	1	1	1	1	0.666667	0.666667
OTU_4	4210	Root	Bacteria	Firmicutes		Clostridia		Thermoanaerobacterales		Thermoanaerobacteraceae				0.64	Syntrophaceticus_schinkii_(T)_Sp3_(EU386162)	90.5	1	2871	506	400	433		0.0625082	0.650838		6	7	2892		100	399		1	1	1	1	1	0.75	0.75
OTU_6	3891	Root	Archaea	Euryarchaeota		Methanobacteria		Methanobacteriales		Methanobacteriaceae		Methanobacterium		1	Methanobacterium_aarhusense_(T)_H2-LR_(AY386124)	99.6	1	3104	271	253	263		0.0675811	0.718419		-	-	3131		100	201		1	1	1	1	1	0.8	0.8
OTU_5	3640	Root	Bacteria	Firmicutes		Clostridia		Clostridiales						0.89	Desulfotomaculum_acetoxidans_(T)_DSM_771_(Y11566)	90.9	1	2463	1177	0	0		0.0536251	0.772044		-	6	2474		100	762		1	0	0	1	1	0.666667	0.666667
OTU_8	3011	Root	Archaea	Euryarchaeota		Methanobacteria		Methanobacteriales		Methanobacteriaceae		Methanothermobacter		1	Methanothermobacter_thermoflexus_(T)_IDZ,_VKM_B-1963,_DSM_7268_(X99047)	100	7	2685	326	0	0		0.0584585	0.830503		-	-	2705		100	185		1	0	0	1	1	0.571429	0.571429
OTU_7	2285	Root	Bacteria											0.95	*	0	1	955	556	482	292		0.0207925	0.851295		-	-	-		100	391		1	1	1	1	1	0.625	0.625
OTU_9	1995	Root	Bacteria	Ignavibacteriae		Ignavibacteria		Ignavibacteriales		Ignavibacteriaceae		Ignavibacterium		1	Ignavibacterium_album_(T)_Mat9-16_(AB478415)	99.6	1	1089	408	236	262		0.02371	0.875005		-	9	3639		100	246		1	1	1	1	1	0.666667	0.666667
OTU_11	1827	Root	Bacteria	Spirochaetes		Spirochaetia		Spirochaetales		Spirochaetaceae				0.57	Treponema_zuelzerae_(T)_type_strain:_DSM_1903;_2_(FR749929)	85.8	1	1171	305	122	229		0.0254953	0.900501		13	5956	5986		100	210		1	1	1	1	1	0.7	0.7
OTU_10	1535	Root	Bacteria	Firmicutes		Clostridia								0.84	Moorella_humiferrea_(T)_64_FGQ_(GQ872425)	88.9	2	129	847	559	0		0.00280862	0.903309		4	-	128		100	576		1	1	0	1	1	0.727273	0.636364
OTU_14	1261	Root	Archaea	Euryarchaeota		Methanobacteria		Methanobacteriales		Methanobacteriaceae		Methanobacterium		0.9	Methanobacterium_alcaliphilum_(T)_NBRC_105226_(AB496639)	100	2	1161	100	0	0		0.0252776	0.928587		-	586	1168		100	107		1	0	0	1	1	0.666667	0.583333
OTU_12	1221	Root	Bacteria	Nitrospirae		Nitrospira		Nitrospirales		Nitrospiraceae		Thermodesulfovibrio		1	Thermodesulfovibrio_aggregans_(T)_TGE-P1_(AB021302)	96.4	1	722	440	59	0		0.0157196	0.944307		24	10	17201		100	272		1	1	0	1	1	0.692308	0.538462
OTU_13	862	Root	Bacteria	Firmicutes		Clostridia		Clostridiales		Peptococcaceae 2		Pelotomaculum		0.95	Pelotomaculum_propionicicum_(T)_MGP_(AB154390)	99.2	1	188	67	43	564		0.00409319	0.9484		4	-	1186		100	51		1	1	1	1	1	0.714286	0.571429
OTU_15	470	Root	Bacteria											0.92	*	0	1	259	211	0	0		0.00563902	0.954039		-	-	-		100	189		1	0	0	1	1	0.666667	0.533333
OTU_16	460	Root	Bacteria	Bacteroidetes										0.87	*	0	1	269	100	26	65		0.00585674	0.959895		-	-	-		100	78		1	1	1	1	1	0.6875	0.5625
OTU_20	381	Root	Bacteria	Firmicutes		Clostridia		Natranaerobiales		Natranaerobiaceae		Dethiobacter		0.92	Dethiobacter_alkaliphilus_(T)_AHT_1_(EF422412)	96	1	102	114	18	147		0.00222077	0.962116		15	0	3869		100	41		1	1	1	1	1	0.705882	0.588235
OTU_17	316	Root	Bacteria											1	uncultured_bacterium_KF-JG30-18_(AJ295656)	90.1	1	44	28	23	221		0.00095798	0.963074		-	-	44		100	27		1	1	1	1	1	0.722222	0.611111
OTU_18	309	Root	Bacteria	Bacteroidetes		Bacteroidia		Bacteroidales		Prolixibacteraceae				0.87	Sunxiuqinia_faeciviva_(T)_JAM-BA0302_(AB362263)	91.7	1	112	82	53	62		0.00243849	0.965513		53	119	1118		100	54		1	1	1	1	1	0.736842	0.631579
OTU_19	285	Root	Bacteria	Proteobacteria		Deltaproteobacteria		Syntrophobacterales		Syntrophaceae		Smithella		0.97	Smithella_propionica_(T)_LYP_(AF126282)	98	1	220	65	0	0		0.0047899	0.970303		77	108	577		100	35		1	0	0	1	1	0.7	0.6
OTU_22	195	Root	Bacteria	Firmicutes		Clostridia		Clostridiales						0.73	Caldicoprobacter_oshimai_(T)_JW/HY-331_(AB450762)	92.5	2	135	60	0	0		0.00293926	0.973242		-	-	33		100	87		1	0	0	1	1	0.666667	0.571429
OTU_21	193	Root	Bacteria	Chloroflexi		Anaerolineae		Anaerolineales		Anaerolineaceae				0.69	Thermanaerothrix_daxensis_strain_GNS-1_(NR_117865.1)	87.4	2	70	79	0	44		0.00152406	0.974766		2	-	54		100	48		1	0	1	1	1	0.636364	0.590909
OTU_23	184	Root	Bacteria	Nitrospirae		Nitrospira		Nitrospirales		Nitrospiraceae		Thermodesulfovibrio		1	Thermodesulfovibrio_yellowstonii_(T)_YP87_(AB231858)	100	1	107	77	0	0		0.00232963	0.977096		-	-	109		100	70		1	0	0	1	1	0.608696	0.565217
OTU_24	161	Root	Bacteria	Chloroflexi		Anaerolineae		Anaerolineales		Anaerolineaceae		Bellilinea		1	Bellilinea_caldifistulae_(T)_GOMI-1_(AB243672)	98.8	1	93	48	0	20		0.00202482	0.97912		-	58	81		100	24		1	0	1	1	1	0.583333	0.583333
OTU_25	132	Root	Bacteria	Proteobacteria		Deltaproteobacteria		Desulfuromonadales		Desulfuromonadaceae		Desulfuromonas		0.91	Desulfuromonas_acetexigens_(T)_(U23140)	96.8	1	132	0	0	0		0.00287394	0.981994		27333	1554	27497		77	1		0	0	0	0	1	0.583333	0.56
OTU_27	99	Root	Bacteria	Firmicutes		Clostridia								0.65	Dethiobacter_alkaliphilus_(T)_AHT_1_(EF422412)	91.7	1	58	41	0	0		0.00126279	0.983257		15	0	3869		100	24		1	0	0	1	1	0.56	0.538462
OTU_28	85	Root	Bacteria	Firmicutes		Clostridia								0.67	Desulfotomaculum_kuznetsovii_strain_17_(NR_115129.1)	89.7	2	50	35	0	0		0.00108861	0.984346		-	-	50		100	25		1	0	0	1	1	0.538462	0.518519
OTU_26	84	Root	Bacteria	Chloroflexi		Anaerolineae		Anaerolineales		Anaerolineaceae				0.99	Leptolinea_tardivitalis_(T)_YMTK-2_(AB109438)	93.7	1	29	37	18	0		0.000631396	0.984977		-	-	18		100	21		1	1	0	1	1	0.555556	0.5
OTU_30	71	Root	Bacteria	Proteobacteria		Deltaproteobacteria				Syntrophorhabdaceae		Syntrophorhabdus		1	Syntrophorhabdus_aromaticivorans_(T)_UI_(AB212873)	98.8	1	52	19	0	0		0.00113216	0.986109		25	82	1516		100	12		1	0	0	1	1	0.535714	0.482759
OTU_29	52	Root	Bacteria	Acidobacteria		Acidobacteria_Gp3						Gp3		0.69	Acidobacteria_bacterium_P105_(KJ461654)	96	1	31	21	0	0		0.00067494	0.986784		-	-	31		100	14		1	0	0	1	1	0.517241	0.466667
OTU_31	41	Root	Bacteria	Proteobacteria		Epsilonproteobacteria		Campylobacterales		Campylobacteraceae		Sulfurospirillum		0.62	Sulfurospirillum_alkalitolerans_HTRB-L1_(GQ863490)	97.2	1	41	0	0	0		0.000892663	0.987677		2340	31	14011		2	1		0	0	0	0	1	0.517241	0.451613
OTU_32	41	Root	Bacteria	Actinobacteria		Actinobacteria	Coriobacteridae	Coriobacteriales	Coriobacterineae	Coriobacteriaceae				0.5	Olegusella_massiliensis_strain_KHD7_(NR_146815.1)	89.7	1	20	21	0	0		0.000435445	0.988112		11	5	3418		100	11		1	0	0	1	1	0.5	0.4375
OTU_33	30	Root	Archaea	Euryarchaeota		Methanomicrobia		Methanomicrobiales		Methanomicrobiales_incertae_sedis		Methanocalculus		1	Methanocalculus_pumilus_(T)_MHT-1_(AB008853)	99.6	1	30	0	0	0		0.000653168	0.988766		3312	29	10512		25	1		0	0	0	0	1	0.5	0.424242
OTU_35	29	Root	Archaea	Euryarchaeota		Methanobacteria		Methanobacteriales		Methanobacteriaceae		Methanobacterium		1	Methanobacterium_subterraneum_(T)_A8p,_DSM_11074_(X99044)	100	1	29	0	0	0		0.000631396	0.989397		6	7736	7783		32	35		0	0	0	0	1	0.5	0.411765
OTU_34	29	Root	Bacteria	Bacteroidetes		Bacteroidia		Bacteroidales						0.61	Porphyromonas_pogonae_strain_MI_10-1288_(NR_136443.1)	86.2	2	29	0	0	0		0.000631396	0.990028		1059	389	6717		2	732		0	0	0	0	1	0.5	0.4
OTU_39	18	Root	Archaea	Euryarchaeota		Methanobacteria		Methanobacteriales		Methanobacteriaceae		Methanobacterium		1	Methanobacterium_formicicum_(T)_DSM_1535_(AF169245)	99.6	1	18	0	0	0		0.000391901	0.99042		10	33	22906		14	174		0	0	0	0	1	0.5	0.388889
OTU_36	18	Root	Bacteria	Bacteroidetes										0.99	Pedobacter_sp._MIC2002_(JX978785)	87	1	18	0	0	0		0.000391901	0.990812		13	4	4137		39	727		0	0	0	0	1	0.5	0.378378
OTU_38	17	Root	Bacteria	Proteobacteria		Deltaproteobacteria		Syntrophobacterales		Syntrophobacteraceae		Syntrophobacter		1	Syntrophobacter_sulfatireducens_(T)_TB8106_(AY651787)	100	1	17	0	0	0		0.000370128	0.991182		219	254	255		100	3		0	0	0	1	0.967742	0.483871	0.368734
OTU_37	16	Root	Bacteria	Firmicutes		Clostridia		Clostridiales		Eubacteriaceae		Acetobacterium		1	Acetobacterium_malicum_(T)_DSM_4132_(X96957)	100	3	16	0	0	0		0.000348356	0.991531		929	153	2442		1	505		0	0	0	0	0.967742	0.483871	0.359569
OTU_40	16	Root	Archaea	Euryarchaeota		Methanomicrobia		Methanosarcinales		Methanotrichaceae		Methanothrix		1	Methanosaeta_harundinacea_(T)_8Ac_(AY817738)	97.2	1	16	0	0	0		0.000348356	0.991879		1032	3332	11703		60	1		0	0	0	0	0.967742	0.483871	0.350849
OTU_44	14	Root	Bacteria	Firmicutes		Clostridia								0.59	Thermacetogenium_phaeum_(T)_PB_(AB020336)	87	1	14	0	0	0		0.000304812	0.992184		5	3285	3303		14	513		0	0	0	0	0.967742	0.483871	0.342541
OTU_41	14	Root	Bacteria	Firmicutes		Clostridia		Natranaerobiales		Natranaerobiaceae		Dethiobacter		0.58	Dethiobacter_alkaliphilus_(T)_AHT_1_(EF422412)	89.7	1	14	0	0	0		0.000304812	0.992489		15	0	3869		4	65		0	0	0	0	0.967742	0.483871	0.334618
OTU_42	14	Root	Bacteria	Actinobacteria		Actinobacteria	Coriobacteridae	Coriobacteriales	Coriobacterineae	Coriobacteriaceae				0.59	Atopobium_vaginae_(T)_CCUG_38953_(Y17195)	88.5	1	14	0	0	0		0.000304812	0.992793		51	14	9732		31	5		0	0	0	0	0.967742	0.483871	0.327054
OTU_43	13	Root	Bacteria	Firmicutes		Bacilli		Lactobacillales		Lactobacillaceae		Lactobacillus		1	Lactobacillus_gasseri_(T)_ATCC_33323_(AF519171)	100	4	13	0	0	0		0.000283039	0.993076		-	7	13		0	0		0	0	0	0	0.967742	0.483871	0.319823
OTU_48	11	Root	Archaea	Euryarchaeota		Methanomicrobia		Methanosarcinales		Methanosarcinaceae		Methanosarcina		1	Methanosarcina_siciliae_type_strain:_DSM3028_(FR733698)	100	7	11	0	0	0		0.000239495	0.993316		1238	54	2085		39	1		0	0	0	0	0.967742	0.483871	0.312906
OTU_47	10	Root	Bacteria	Firmicutes		Clostridia		Clostridiales		Ruminococcaceae				0.5	Thermincola_carboxydiphila_(T)_2204_(AY603000)	89.3	1	10	0	0	0		0.000217723	0.993534		9	14	5160		15	338		0	0	0	0	0.967742	0.483871	0.306281
OTU_50	10	Root	Bacteria	Firmicutes										0.96	Bacillaceae_bacterium_13CC_(JN571119)	90.9	1	10	0	0	0		0.000217723	0.993751		10	7	3140		12	522		0	0	0	0	0.967742	0.483871	0.299931
OTU_75	10	Root	Bacteria	Proteobacteria		Betaproteobacteria		Rhodocyclales		Rhodocyclaceae		Thauera		0.98	Azoarcus_olearius_DQS-4_(EF158388)	99.2	1	10	0	0	0		0.000217723	0.993969		71	13	7416		0	0		0	0	0	0	0.967742	0.483871	0.293839
OTU_49	9	Root	Bacteria	Firmicutes		Clostridia		Clostridiales		Eubacteriaceae		Alkalibacter		1	Alkalibacter_saccharofermentans_(T)_Z-79820_(AY312403)	100	1	9	0	0	0		0.00019595	0.994165		18	6	2300		9	559		0	0	0	0	0.967742	0.483871	0.287989
OTU_80	9	Root	Bacteria	Firmicutes		Clostridia								0.64	Caloramator_fervidus_(T)_RT4._B1_(L09187)	89.7	1	9	0	0	0		0.00019595	0.994361		-	-	60		100	96		0	0	0	1	0.9375	0.46875	0.282541
OTU_62	9	Root	Bacteria	Firmicutes		Clostridia		Clostridiales		Syntrophomonadaceae		Syntrophomonas		0.98	Syntrophomonas_zehnderi_(T)_OL-4_(DQ898277)	95.3	1	9	0	0	0		0.00019595	0.994557		11	2	1108		25	1		0	0	0	0	0.9375	0.46875	0.277294
OTU_59	9	Root	Bacteria											1	Thermanaerovibrio_acidaminovorans_strain_DSM_6589_(NR_114455.1)	87	1	9	0	0	0		0.00019595	0.994753		-	-	9		74	99		0	0	0	0	0.9375	0.46875	0.272239
OTU_51	9	Root	Bacteria											1	Anaerobacterium_chartisolvens_T-1-35_(AB793710)	87	2	9	0	0	0		0.00019595	0.994949		11	-	1254		0	0		0	0	0	0	0.9375	0.46875	0.267365
OTU_45	9	Root	Bacteria	Bacteroidetes		Bacteroidia		Bacteroidales		Porphyromonadaceae				0.67	Parabacteroides_distasonis_(T)_JCM_5825_(AB238922)	85.8	1	9	0	0	0		0.00019595	0.995145		1270	3116	3129		0	0		0	0	0	0	0.9375	0.46875	0.262662
OTU_46	9	Root	Bacteria	Bacteroidetes		Bacteroidia		Bacteroidales		Porphyromonadaceae		Odoribacter		0.99	Culturomica_massiliensis_strain_Marseille-P2698_(NR_144745.1)	93.3	1	9	0	0	0		0.00019595	0.995341		-	2	9		1	728		0	0	0	0	0.9375	0.46875	0.258122
OTU_68	8	Root	Archaea	Euryarchaeota		Methanobacteria		Methanobacteriales		Methanobacteriaceae		Methanobacterium		1	Methanobacterium_oryzae_(T)_FPi_(AF028690)	99.6	1	8	0	0	0		0.000174178	0.995515		-	-	-		5	1		0	0	0	0	0.9375	0.46875	0.253736
OTU_54	8	Root	Bacteria	Bacteroidetes										1	Marivirga_sericea_(T)_IFO_15983_(AB078081)	87	3	8	0	0	0		0.000174178	0.995689		125	-	257		2	732		0	0	0	0	0.9375	0.46875	0.249497
OTU_60	7	Root	Bacteria	Proteobacteria		Alphaproteobacteria		Rhizobiales		Rhodobiaceae		Parvibaculum		1	Parvibaculum_lavamentivorans_(T)_DS-1_(AY387398)	100	1	7	0	0	0		0.000152406	0.995841		5	-	3448		0	0		0	0	0	0	0.9375	0.46875	0.245397
OTU_61	7	Root	Bacteria	Firmicutes		Bacilli		Lactobacillales		Lactobacillaceae		Lactobacillus		0.97	Lactobacillus_faecis_AFL13-2_(AB812750)	100	4	7	0	0	0		0.000152406	0.995994		-	5	30		0	0		0	0	0	0	0.9375	0.46875	0.24143
OTU_53	7	Root	Bacteria	Firmicutes		Negativicutes		Selenomonadales		Veillonellaceae				0.53	Lysinibacillus_sp._LAM612_(KF443809)	88.5	2	7	0	0	0		0.000152406	0.996146		-	533	945		31	1		0	0	0	0	0.9375	0.46875	0.237589
OTU_76	7	Root	Bacteria	Synergistetes		Synergistia		Synergistales		Synergistaceae		Thermovirga		0.88	Thermovirga_lienii_(T)_Cas60314_(DQ071273)	91.7	1	7	0	0	0		0.000152406	0.996299		-	-	774		8	29		0	0	0	0	0.9375	0.46875	0.233868
OTU_67	6	Root	Bacteria	Firmicutes		Clostridia		Thermoanaerobacterales		Thermoanaerobacteraceae				0.55	Thermoanaerobacter_pseudethanolicus_ATCC_33223_(CP000924)	89.7	2	6	0	0	0		0.000130634	0.996429		-	32	33		100	84		0	0	0	1	0.909091	0.454545	0.230369
OTU_66	6	Root	Bacteria	Bacteroidetes										0.99	Cytophaga_xylanolytica_strain_DSM_6779_(NR_117112.1)	86.6	2	6	0	0	0		0.000130634	0.99656		-	6	2087		0	0		0	0	0	0	0.909091	0.454545	0.226974
OTU_88	6	Root	Bacteria	Firmicutes		Clostridia		Clostridiales						1	Natranaerovirga_pectinivora_(T)_AP3_(GQ922846)	94.9	1	6	0	0	0		0.000130634	0.996691		5	5	932		22	273		0	0	0	0	0.909091	0.454545	0.223677
OTU_64	6	Root	Bacteria	Bacteroidetes										1	Sunxiuqinia_faeciviva_(T)_JAM-BA0302_(AB362263)	85.8	1	6	0	0	0		0.000130634	0.996821		53	119	1118		0	0		0	0	0	0	0.909091	0.454545	0.220475
OTU_52	6	Root	Bacteria	Bacteroidetes		Bacteroidia		Bacteroidales		Porphyromonadaceae				0.97	Muribaculum_intestinale_strain_YL27_(NR_144616.1)	93.7	1	6	0	0	0		0.000130634	0.996952		5	5	6		1	728		0	0	0	0	0.909091	0.454545	0.217363
OTU_102	5	Root	Bacteria	Proteobacteria		Gammaproteobacteria		Chromatiales						0.56	Spiribacter_salinus_M19-40_(CP005963)	92.9	2	5	0	0	0		0.000108861	0.997061		14	4	5401		0	0		0	0	0	0	0.909091	0.454545	0.214338
OTU_63	5	Root	Bacteria	Firmicutes		Clostridia		Clostridiales						0.85	Clostridium_hungatei_(T)_AD;_ATCC_700212_(AF020429)	91.3	1	5	0	0	0		0.000108861	0.99717		32	1124	1132		9	720		0	0	0	0	0.909091	0.454545	0.211396
OTU_92	5	Root	Bacteria	Bacteroidetes										0.98	Lutaonella_thermophila_(T)_CC-MHSW-2_(EU287913)	86.6	1	5	0	0	0		0.000108861	0.997278		15	5	1251		1	728		0	0	0	0	0.909091	0.454545	0.208533
OTU_72	5	Root	Bacteria	Proteobacteria										0.53	*	0	1	5	0	0	0		0.000108861	0.997387		-	-	-		0	0		0	0	0	0	0.909091	0.454545	0.205747
OTU_58	5	Root	Bacteria	Deferribacteres		Deferribacteres		Deferribacterales		Deferribacteraceae		Geovibrio		1	Geovibrio_ferrireducens_(T)_PAL-1_(X95744)	99.2	1	5	0	0	0		0.000108861	0.997496		-	-	562		0	0		0	0	0	0	0.909091	0.454545	0.203034
OTU_69	5	Root	Bacteria	Bacteroidetes		Bacteroidia		Bacteroidales		Porphyromonadaceae		Coprobacter		0.51	Muribaculum_intestinale_strain_YL27_(NR_144616.1)	94.8	1	5	0	0	0		0.000108861	0.997605		5	5	6		1	728		0	0	0	0	0.909091	0.454545	0.200392
OTU_83	5	Root	Bacteria	Bacteroidetes		Flavobacteriia		Flavobacteriales						0.5	Cytophaga_fermentans_(T)_ATCC_19072_(M58766)	88.9	1	5	0	0	0		0.000108861	0.997714		9	7	5880		0	0		0	0	0	0	0.909091	0.454545	0.197818
OTU_97	5	Root	Bacteria	Firmicutes		Clostridia		Clostridiales		Clostridiaceae 4		Geosporobacter		0.97	Geosporobacter_ferrireducens_strain_IRF9_(NR_148302.1)	100	2	5	0	0	0		0.000108861	0.997823		-	-	945		9	559		0	0	0	0	0.909091	0.454545	0.19531
OTU_93	5	Root	Bacteria	Ignavibacteriae		Ignavibacteria		Ignavibacteriales		Ignavibacteriaceae		Melioribacter		0.81	Melioribacter_roseus_P3M-2_(JQ292917)	95.7	1	5	0	0	0		0.000108861	0.997932		6	4	1015		0	0		0	0	0	0	0.909091	0.454545	0.192864
OTU_74	5	Root	Bacteria	Proteobacteria		Alphaproteobacteria		Rhodospirillales		Rhodospirillaceae				0.67	Magnetospira_thiophila_(T)_MMS-1_(EU861390)	90.1	1	5	0	0	0		0.000108861	0.99804		6	290	469		0	0		0	0	0	0	0.909091	0.454545	0.190478
OTU_98	5	Root	Bacteria											1	Streptomyces_cinereorectus_(T)_NBRC_15395_(AB184646)	86.6	12	5	0	0	0		0.000108861	0.998149		-	-	5		98	1		0	0	0	1	0.882353	0.441176	0.188219
OTU_56	4	Root	Bacteria	Firmicutes		Clostridia		Clostridiales		Syntrophomonadaceae		Syntrophomonas		1	Syntrophomonas_bryantii_type_strain:_DSM_3014_(HE654006)	96.8	1	4	0	0	0		8.7089e-05	0.998236		53	61	439		0	1		0	0	0	0	0.882353	0.441176	0.186012
OTU_77	4	Root	Bacteria	Chloroflexi		Anaerolineae		Anaerolineales		Anaerolineaceae				0.65	Bellilinea_caldifistulae_(T)_GOMI-1_(AB243672)	87.7	1	4	0	0	0		8.7089e-05	0.998324		-	58	81		87	1		0	0	0	0	0.882353	0.441176	0.183857
OTU_78	4	Root	Bacteria	Firmicutes										0.72	Gelria_glutamica_(T)_TGO_(AF321086)	87.4	1	4	0	0	0		8.7089e-05	0.998411		8	10	905		15	742		0	0	0	0	0.882353	0.441176	0.18175
OTU_55	4	Root	Bacteria	Proteobacteria		Deltaproteobacteria		Desulfovibrionales		Desulfovibrionaceae		Desulfovibrio		1	Desulfovibrio_alkalitolerans_(T)_RT2_(AY649785)	99.2	1	4	0	0	0		8.7089e-05	0.998498		108	429	762		0	0		0	0	0	0	0.882353	0.441176	0.179692
OTU_57	4	Root	Bacteria	Bacteroidetes		Bacteroidia		Bacteroidales		Porphyromonadaceae				0.85	Muribaculum_intestinale_strain_YL27_(NR_144616.1)	89.7	1	4	0	0	0		8.7089e-05	0.998585		5	5	6		0	0		0	0	0	0	0.882353	0.441176	0.17768
OTU_100	4	Root	Bacteria	Firmicutes		Clostridia		Clostridiales						0.68	Gelria_glutamica_(T)_TGO_(AF321086)	89.7	1	4	0	0	0		8.7089e-05	0.998672		8	10	905		83	80		0	0	0	0	0.882353	0.441176	0.175712
OTU_65	4	Root	Bacteria											1	*	0	1	4	0	0	0		8.7089e-05	0.998759		-	-	-		12	225		0	0	0	0	0.882353	0.441176	0.173788
OTU_101	4	Root	Bacteria	Proteobacteria		Gammaproteobacteria		Pseudomonadales		Pseudomonadaceae		Pseudomonas		0.88	Pseudomonas_aestusnigri_CCUG_64165;_VGXO14_(HG004394)	98.4	1	4	0	0	0		8.7089e-05	0.998846		18	-	4692		0	0		0	0	0	0	0.882353	0.441176	0.171905
OTU_85	4	Root	Bacteria	Chloroflexi		Anaerolineae		Anaerolineales		Anaerolineaceae				0.95	Thermanaerothrix_daxensis_strain_GNS-1_(NR_117865.1)	85.4	1	4	0	0	0		8.7089e-05	0.998933		2	-	54		83	2		0	0	0	0	0.882353	0.441176	0.170062
OTU_73	4	Root	Bacteria	Proteobacteria		Alphaproteobacteria		Rhodobacterales		Rhodobacteraceae				1	Paracoccus_aestuarii_(T)_B7_(EF660757)	99.2	7	4	0	0	0		8.7089e-05	0.99902		5	3	1524		0	0		0	0	0	0	0.882353	0.441176	0.168259
OTU_90	4	Root	Bacteria	Chloroflexi		Anaerolineae		Anaerolineales		Anaerolineaceae		Ornatilinea		0.95	Ornatilinea_apprima_P3M-1_(JQ292916)	90.1	1	4	0	0	0		8.7089e-05	0.999107		796	8	799		8	13		0	0	0	0	0.882353	0.441176	0.166493
OTU_99	4	Root	Bacteria	Firmicutes		Clostridia		Clostridiales						0.94	Clostridium_putrificum_(T)_DSM_1734_(X73442)	92.1	1	4	0	0	0		8.7089e-05	0.999194		23	-	469		18	285		0	0	0	0	0.882353	0.441176	0.164764
OTU_96	4	Root	Bacteria	Bacteroidetes		Bacteroidia		Bacteroidales		Porphyromonadaceae		Proteiniphilum		0.87	Proteiniphilum_acetatigenes_(T)_TB107_(AY742226)	97.6	1	4	0	0	0		8.7089e-05	0.999282		27	7	2600		0	0		0	0	0	0	0.882353	0.441176	0.163071
OTU_94	3	Root	Bacteria	Tenericutes		Mollicutes		Acholeplasmatales		Acholeplasmataceae		Acholeplasma		0.99	Acholeplasma_parvum_(T)_H23M_(AY538170)	94.8	1	3	0	0	0		6.53168e-05	0.999347		-	7	2033		0	0		0	0	0	0	0.882353	0.441176	0.161412
OTU_82	3	Root	Bacteria	Firmicutes										0.59	*	0	1	3	0	0	0		6.53168e-05	0.999412		-	-	-		1	242		0	0	0	0	0.882353	0.441176	0.159786
OTU_84	3	Root	Bacteria	Bacteroidetes		Bacteroidia		Bacteroidales		Porphyromonadaceae				0.97	Muribaculum_intestinale_strain_YL27_(NR_144616.1)	93.7	1	3	0	0	0		6.53168e-05	0.999477		5	5	6		0	0		0	0	0	0	0.882353	0.441176	0.158193
OTU_71	3	Root	Bacteria	Proteobacteria		Alphaproteobacteria		Rhizobiales		Methylocystaceae		Pleomorphomonas		0.99	Pleomorphomonas_diazotrophica_R5-392_(JQ346801)	100	2	3	0	0	0		6.53168e-05	0.999543		-	-	748		0	0		0	0	0	0	0.882353	0.441176	0.156632
OTU_86	3	Root	Bacteria	Firmicutes		Clostridia		Clostridiales		Clostridiales_Incertae Sedis XIV		Anaerobranca		1	Anaerobranca_zavarzinii_(T)_JW/VK-KS5Y_(EF190921)	100	1	3	0	0	0		6.53168e-05	0.999608		-	-	289		1	505		0	0	0	0	0.882353	0.441176	0.155101
OTU_70	3	Root	Bacteria	Firmicutes		Clostridia		Thermoanaerobacterales		Thermoanaerobacteraceae		Moorella		0.98	Moorella_glycerini_(T)_YS6_(U82327)	95.7	3	3	0	0	0		6.53168e-05	0.999673		-	6	6		73	88		0	0	0	0	0.882353	0.441176	0.153599
OTU_87	3	Root	Bacteria	Firmicutes		Clostridia		Natranaerobiales		Natranaerobiaceae		Dethiobacter		0.96	Dethiobacter_alkaliphilus_(T)_AHT_1_(EF422412)	96	1	3	0	0	0		6.53168e-05	0.999739		15	0	3869		23	57		0	0	0	0	0.882353	0.441176	0.152126
OTU_89	2	Root	Bacteria											0.99	Aminobacterium_colombiense_strain_DSM_12261_(NR_074624.1)	85.8	2	2	0	0	0		4.35445e-05	0.999782		4	-	369		7	31		0	0	0	0	0.882353	0.441176	0.150682
OTU_95	2	Root	Bacteria	Firmicutes		Clostridia								0.88	Desulfurispora_thermophila_(T)_RA50E1_(AY548776)	90.9	1	2	0	0	0		4.35445e-05	0.999826		-	-	7		63	14		0	0	0	0	0.882353	0.441176	0.149264
OTU_81	2	Root	Bacteria	Firmicutes		Clostridia		Clostridiales		Clostridiales_Incertae Sedis XI		Tissierella		0.61	Soehngenia_saccharolytica_(T)_BOR-Y_(AY353956)	96.8	1	2	0	0	0		4.35445e-05	0.999869		4	4	767		0	0		0	0	0	0	0.882353	0.441176	0.147873
OTU_103	2	Root	Bacteria	Firmicutes		Clostridia		Thermoanaerobacterales		Thermoanaerobacteraceae				0.51	uncultured_soil_bacterium_PBS-III-27_(AJ390456)	86.2	2	2	0	0	0		4.35445e-05	0.999913		-	-	42		40	278		0	0	0	0	0.882353	0.441176	0.146508
OTU_91	2	Root	Bacteria	Proteobacteria		Deltaproteobacteria		Syntrophobacterales		Syntrophaceae		Smithella		0.7	Smithella_propionica_(T)_LYP_(AF126282)	93.3	1	2	0	0	0		4.35445e-05	0.999956		77	108	577		0	0		0	0	0	0	0.882353	0.441176	0.145167
OTU_79	2	Root	Bacteria	Proteobacteria		Alphaproteobacteria		Rhizobiales		Phyllobacteriaceae				0.93	Mesorhizobium_camelthorni_(T)_CCNWXJ40-4_(EU169581)	99.6	1	2	0	0	0		4.35445e-05	1		2	-	1137		0	0		0	0	0	0	0.882353	0.441176	0.143851

## Sheet: AESS-W3
																		34812	23063	10874	11432
																	0.98	39	39	24	24
																	0.99	52	49	26	24					Crosstalk?
OTU	Size	RDP classification													Species	Match%	Match#	W3 amplicon	W3 extended	W3 Spades	W3 Spades 16S		% in amplicon	cumulative		W1 amplicon	W2 amplicon	Max from all samples		W3 WGS coverage	WGS 'depth'		Kelpie	Spades	Spades 16S	Possible	Kelpie	Spades	Spades 16S		OTU	Coverage	Depth
OTU_2	12534	Root	Archaea	Euryarchaeota		Methanobacteria		Methanobacteriales		Methanobacteriaceae		Methanobacterium		1	Methanobacterium_subterraneum_(T)_A8p,_DSM_11074_(X99044)	100	1	7736	2393	1396	1009		0.222222	0.222222		6	29	7783		100	1465		1	1	1	1	1	1	1		OTU_2;size=12534;	100	1465
OTU_1	12396	Root	Bacteria	Spirochaetes		Spirochaetia		Spirochaetales		Spirochaetaceae				0.57	Treponema_zuelzerae_(T)_type_strain:_DSM_1903;_2_(FR749929)	85.8	1	5956	3069	1889	1482		0.17109	0.393313		13	1171	5986		100	2033		1	1	1	1	1	1	1		OTU_1;size=12396;	100	2033
OTU_3	7230	Root	Archaea	Euryarchaeota		Methanomicrobia		Methanosarcinales		Methanotrichaceae		Methanothrix		1	Methanosaeta_harundinacea_(T)_8Ac_(AY817738)	97.2	1	3332	1942	1044	912		0.0957141	0.489027		1032	16	11703		100	1198		1	1	1	1	1	1	1		OTU_3;size=7230;	100	1198
OTU_4	6989	Root	Bacteria	Bacteroidetes		Bacteroidia		Bacteroidales		Porphyromonadaceae				0.66	Parabacteroides_distasonis_(T)_JCM_5825_(AB238922)	85.8	1	3116	1598	1207	1068		0.0895094	0.578536		1270	9	3129		100	977		1	1	1	1	1	1	1		OTU_4;size=6989;	100	977
OTU_6	5988	Root	Bacteria	Firmicutes		Negativicutes		Selenomonadales		Veillonellaceae				0.53	Lysinibacillus_sp._LAM612_(KF443809)	88.5	2	533	4068	0	1387		0.0153108	0.593847		-	7	945		100	2139		1	0	1	1	1	0.8	1		OTU_6;size=5988;	100	2139
OTU_5	5501	Root	Bacteria	Firmicutes		Clostridia								0.58	Thermacetogenium_phaeum_(T)_PB_(AB020336)	87	1	3285	2216	0	0		0.094364	0.688211		5	14	3303		100	1275		1	0	0	1	1	0.666667	0.833333		OTU_5;size=5501;	100	1275
OTU_7	3309	Root	Bacteria	Proteobacteria		Deltaproteobacteria		Desulfuromonadales		Desulfuromonadaceae		Desulfuromonas		0.91	Desulfuromonas_acetexigens_(T)_(U23140)	96.8	1	1554	1010	195	550		0.0446398	0.732851		27333	132	27497		100	581		1	1	1	1	1	0.714286	0.857143		OTU_7;size=3309;	100	581
OTU_12	2520	Root	Bacteria	Firmicutes		Clostridia		Clostridiales		Clostridiaceae 2		Natronincola		0.87	Natronincola_peptidivorans_(T)_Z-7031_(EF382661)	99.2	1	1293	754	0	473		0.0371424	0.769993		12	-	1299		100	663		1	0	1	1	1	0.625	0.875		OTU_12;size=2520;	100	663
OTU_8	2221	Root	Bacteria	Firmicutes		Clostridia		Clostridiales						0.81	Caldicoprobacter_guelmensis_(T)_D2C22_(JQ707908)	91.3	2	477	343	946	455		0.0137022	0.783695		17	-	780		100	394		1	1	1	1	1	0.666667	0.888889		OTU_8;size=2221;	100	394
OTU_9	2089	Root	Bacteria	Firmicutes		Clostridia		Clostridiales						0.85	Clostridium_hungatei_(T)_AD;_ATCC_700212_(AF020429)	91.3	1	1124	965	0	0		0.0322877	0.815983		32	5	1132		100	613		1	0	0	1	1	0.6	0.8		OTU_9;size=2089;	100	613
OTU_10	1949	Root	Bacteria	Bacteroidetes		Bacteroidia		Bacteroidales		Porphyromonadaceae				0.5	Pontibacter_sp._JC215_A10_(HG008901)	85.8	1	931	1018	0	0		0.0267437	0.842727		5	-	943		100	688		1	0	0	1	1	0.545455	0.727273		OTU_10;size=1949;	100	688
OTU_11	1910	Root	Bacteria	Proteobacteria		Deltaproteobacteria		Desulfovibrionales		Desulfovibrionaceae		Desulfovibrio		1	Desulfovibrio_oxamicus_(T)_DSM_1925_(DQ122124)	100	1	860	624	426	0		0.0247041	0.867431		19	-	866		100	425		1	1	0	1	1	0.583333	0.666667		OTU_11;size=1910;	100	425
OTU_13	1856	Root	Bacteria	Firmicutes		Negativicutes		Selenomonadales		Veillonellaceae		Sporomusa		0.96	Sporomusa_ovata_strain_DSM_2662_(NR_117659.1)	98	3	306	175	805	570		0.00879007	0.876221		-	-	313		100	135		1	1	1	1	1	0.615385	0.692308		OTU_13;size=1856;	100	135
OTU_14	1249	Root	Bacteria	Firmicutes		Clostridia								0.84	Dethiobacter_alkaliphilus_(T)_AHT_1_(EF422412)	89.3	2	0	0	0	1249		0	0.876221		15	102	3869		100	438		0	0	0	0	1	0.615385	0.642857		OTU_14;size=1249;	100	438
OTU_15	1182	Root	Bacteria	Synergistetes		Synergistia		Synergistales		Synergistaceae		Aminiphilus		1	Aminiphilus_circumscriptus_(T)_ILE-2_(AY642589)	95.6	1	0	4	1178	0		0	0.876221		205	-	205		100	478		0	0	0	0	1	0.615385	0.6		OTU_15;size=1182;	100	478
OTU_16	1005	Root	Bacteria	Bacteroidetes		Bacteroidia		Bacteroidales		Bacteroidaceae		Anaerorhabdus		0.6	Dielma_fastidiosa_strain_JC13_(NR_125593.1)	92.5	1	32	178	466	329		0.000919223	0.87714		-	-	35		100	112		1	1	1	1	1	0.642857	0.625		OTU_16;size=1005;	100	112
OTU_18	925	Root	Bacteria	Proteobacteria		Alphaproteobacteria		Rhodospirillales		Rhodospirillaceae				0.67	Magnetospira_thiophila_(T)_MMS-1_(EU861390)	90.1	1	290	285	202	148		0.00833046	0.885471		6	5	469		100	204		1	1	1	1	1	0.666667	0.647059		OTU_18;size=925;	100	204
OTU_17	909	Root	Bacteria	Firmicutes		Clostridia		Clostridiales		Peptococcaceae 1		Desulfitibacter		0.61	Desulfitibacter_alkalitolerans_(T)_sk.kt5_(AY538171)	92.1	1	13	6	241	649		0.000373434	0.885844		-	-	520		100	245		1	1	1	1	1	0.6875	0.666667		OTU_17;size=909;	100	245
OTU_21	851	Root	Archaea	Euryarchaeota		Methanobacteria		Methanobacteriales		Methanobacteriaceae		Methanobacterium		0.9	Methanobacterium_alcaliphilum_(T)_NBRC_105226_(AB496639)	100	2	586	265	0	0		0.0168333	0.902677		-	1161	1168		100	108		1	0	0	1	1	0.647059	0.631579		OTU_21;size=851;	100	108
OTU_19	753	Root	Bacteria	Proteobacteria		Deltaproteobacteria		Syntrophobacterales		Syntrophobacteraceae		Syntrophobacter		1	Syntrophobacter_sulfatireducens_(T)_TB8106_(AY651787)	100	1	254	139	186	174		0.00729633	0.909974		219	17	255		100	88		1	1	1	1	1	0.666667	0.65		OTU_19;size=753;	100	88
OTU_20	701	Root	Bacteria	Proteobacteria		Deltaproteobacteria		Desulfovibrionales		Desulfovibrionaceae		Desulfovibrio		1	Desulfovibrio_alkalitolerans_(T)_RT2_(AY649785)	99.2	1	429	23	135	114		0.0123233	0.922297		108	4	762		100	148		1	1	1	1	1	0.684211	0.666667		OTU_20;size=701;	100	148
OTU_22	652	Root	Bacteria	Bacteroidetes		Bacteroidia		Bacteroidales						0.61	Porphyromonas_pogonae_strain_MI_10-1288_(NR_136443.1)	86.2	2	389	129	71	63		0.0111743	0.933471		1059	29	6717		100	75		1	1	1	1	1	0.7	0.681818		OTU_22;size=652;	100	75
OTU_24	495	Root	Bacteria	Firmicutes		Clostridia		Natranaerobiales		Natranaerobiaceae		Dethiobacter		0.95	Dethiobacter_alkaliphilus_(T)_AHT_1_(EF422412)	96	1	128	104	16	247		0.00367689	0.937148		15	102	3869		100	102		1	1	1	1	1	0.714286	0.695652		OTU_24;size=495;	100	102
OTU_23	440	Root	Bacteria	Proteobacteria		Gammaproteobacteria		Pseudomonadales		Pseudomonadaceae		Pseudomonas		0.99	Pseudomonas_songnenensis_strain_NEAU-ST5-5_(NR_148295.1)	100	2	138	126	102	74		0.00396415	0.941112		6	-	1109		100	82		1	1	1	1	1	0.727273	0.708333		OTU_23;size=440;	100	82
OTU_26	375	Root	Bacteria	Firmicutes		Clostridia		Clostridiales		Eubacteriaceae		Acetobacterium		1	Acetobacterium_malicum_(T)_DSM_4132_(X96957)	100	3	153	155	67	0		0.00439504	0.945507		929	16	2442		100	120		1	1	0	1	1	0.73913	0.68		OTU_26;size=375;	100	120
OTU_25	335	Root	Bacteria	Firmicutes		Clostridia		Clostridiales		Syntrophomonadaceae		Syntrophomonas		1	Syntrophomonas_bryantii_type_strain:_DSM_3014_(HE654006)	96.8	1	61	69	0	205		0.00175227	0.94726		53	4	439		100	38		1	0	1	1	1	0.708333	0.692308		OTU_25;size=335;	100	38
OTU_30	325	Root	Bacteria	Proteobacteria		Deltaproteobacteria		Syntrophobacterales		Syntrophaceae		Smithella		0.97	Smithella_propionica_(T)_LYP_(AF126282)	98	1	108	50	77	90		0.00310238	0.950362		77	220	577		100	27		1	1	1	1	1	0.72	0.703704		OTU_30;size=325;	100	27
OTU_27	307	Root	Bacteria	Bacteroidetes		Bacteroidia		Bacteroidales		Prolixibacteraceae				0.87	Sunxiuqinia_faeciviva_(T)_JAM-BA0302_(AB362263)	91.7	1	119	188	0	0		0.00341836	0.95378		53	112	1118		100	113		1	0	0	1	1	0.692308	0.678571		OTU_27;size=307;	100	113
OTU_28	276	Root	Archaea	Euryarchaeota		Methanomicrobia		Methanosarcinales		Methanosarcinaceae		Methanosarcina		1	Methanosarcina_siciliae_type_strain:_DSM3028_(FR733698)	100	7	54	222	0	0		0.00155119	0.955331		1238	11	2085		100	177		1	0	0	1	1	0.666667	0.655172		OTU_28;size=276;	100	177
OTU_29	276	Root	Bacteria	Firmicutes		Clostridia		Clostridiales		Clostridiaceae 1		Clostridium sensu stricto		1	Clostridium_luticellarii_strain_FW431_(NR_145907.1)	98.4	1	53	63	60	100		0.00152246	0.956854		-	-	53		100	39		1	1	1	1	1	0.678571	0.666667		OTU_29;size=276;	100	39
OTU_31	264	Root	Bacteria	Firmicutes		Clostridia		Clostridiales		Peptococcaceae 1		Desulfitobacterium		0.9	Desulfitobacterium_metallireducens_(T)_853-15A_(AF297871)	97.6	1	146	118	0	0		0.00419396	0.961048		-	-	148		100	140		1	0	0	1	1	0.655172	0.645161		OTU_31;size=264;	100	140
OTU_32	255	Root	Bacteria	Firmicutes		Clostridia		Clostridiales		Peptococcaceae 1		Desulfitibacter		1	Desulfitibacter_alkalitolerans_(T)_sk.kt5_(AY538171)	98.8	1	181	74	0	0		0.00519936	0.966247		-	-	520		100	222		1	0	0	1	1	0.633333	0.625		OTU_32;size=255;	100	222
OTU_33	174	Root	Bacteria	Spirochaetes		Spirochaetia		Spirochaetales		Spirochaetaceae		Spirochaeta		0.51	Spirochaeta_smaragdinae_(T)_SEBR_4228;_DSM_11293_(U80597)	88.1	1	61	53	29	31		0.00175227	0.968		-	-	61		100	30		1	1	1	1	1	0.645161	0.636364		OTU_33;size=174;	100	30
OTU_40	159	Root	Bacteria	Chloroflexi		Anaerolineae		Anaerolineales		Anaerolineaceae		Bellilinea		0.9	Bellilinea_caldifistulae_(T)_GOMI-1_(AB243672)	98	1	58	50	23	28		0.00166609	0.969666		-	93	81		100	28		1	1	1	1	1	0.65625	0.647059		OTU_40;size=159;	100	28
OTU_35	155	Root	Bacteria	Firmicutes										0.96	Clostridium_thermocellum_(T)_ATCC_27405_(CP000568)	92.5	5	106	49	0	0		0.00304493	0.972711		-	-	106		100	111		1	0	0	1	1	0.636364	0.628571		OTU_35;size=155;	100	111
OTU_34	134	Root	Bacteria	Firmicutes		Clostridia		Clostridiales		Clostridiales_Incertae Sedis III		Tepidanaerobacter		0.99	Tepidanaerobacter_syntrophicus_(T)_JL_(AB106353)	95.7	1	32	40	62	0		0.000919223	0.97363		-	-	51		100	37		1	1	0	1	1	0.647059	0.611111		OTU_34;size=134;	100	37
OTU_37	116	Root	Bacteria	Proteobacteria		Deltaproteobacteria				Syntrophorhabdaceae		Syntrophorhabdus		0.99	Syntrophorhabdus_aromaticivorans_(T)_UI_(AB212873)	94.9	1	82	34	0	0		0.00235551	0.975985		25	52	1516		100	44		1	0	0	1	1	0.628571	0.594595		OTU_37;size=116;	100	44
OTU_38	112	Root	Bacteria	Proteobacteria		Deltaproteobacteria		Desulfuromonadales		Geobacteraceae		Geoalkalibacter		0.94	Geoalkalibacter_ferrihydriticus_(T)_Z-0531_(DQ309326)	96.8	1	61	51	0	0		0.00175227	0.977738		4	-	523		100	21		1	0	0	1	1	0.611111	0.578947		OTU_38;size=112;	100	21
OTU_36	92	Root	Bacteria											0.99	*	0	1	11	40	23	18		0.000315983	0.978054		-	-	-		100	26		1	1	1	1	1	0.621622	0.589744		OTU_36;size=92;	100	26
OTU_39	81	Root	Bacteria	Proteobacteria		Deltaproteobacteria				Syntrophorhabdaceae		Syntrophorhabdus		1	Syntrophorhabdus_aromaticivorans_(T)_UI_(AB212873)	97.2	1	25	56	0	0		0.000718143	0.978772		25	52	1516		100	19		1	0	0	1	1	0.605263	0.575		OTU_39;size=81;	100	19
OTU_41	70	Root	Bacteria	Chloroflexi		Anaerolineae		Anaerolineales		Anaerolineaceae				0.63	Longilinea_arvoryzae_(T)_KOME-1_(AB243673)	86.6	2	22	35	6	7		0.000631966	0.979404		-	-	22		100	10		1	1	1	1	1	0.615385	0.585366		OTU_41;size=70;	100	10
OTU_42	70	Root	Bacteria	Firmicutes		Clostridia		Clostridiales		Ruminococcaceae		Ercella		0.99	Ruminococcaceae_bacterium_ZWB_4_(HG003571)	100	1	46	24	0	0		0.00132138	0.980725		169	-	245		100	18		1	0	0	1	1	0.6	0.571429		OTU_42;size=70;	100	18
OTU_44	61	Root	Bacteria	Firmicutes		Clostridia		Clostridiales						0.52	Desulfotomaculum_varum_RH04-3_(GU126374)	88.2	1	39	11	11	0		0.0011203	0.981845		-	-	50		100	11		1	1	0	1	1	0.609756	0.55814		OTU_44;size=61;	100	11
OTU_70	58	Root	Bacteria	Firmicutes		Clostridia		Thermoanaerobacterales		Thermoanaerobacteraceae				0.58	Thermoanaerobacter_pseudethanolicus_ATCC_33223_(CP000924)	89.7	1	32	26	0	0		0.000919223	0.982765		-	6	33		100	134		1	0	0	1	1	0.595238	0.545455		OTU_70;size=58;	100	134
OTU_43	55	Root	Bacteria	Firmicutes		Negativicutes		Selenomonadales		Veillonellaceae				0.83	Veillonella_magna_(T)_lac18_(EU096495)	89.3	1	28	27	0	0		0.00080432	0.983569		-	-	28		100	16		1	0	0	1	1	0.581395	0.533333		OTU_43;size=55;	100	16
OTU_47	45	Root	Bacteria	Proteobacteria		Alphaproteobacteria		Sphingomonadales		Sphingomonadaceae		Sphingomonas		1	Sphingomonas_ginsenosidimutans_(T)_Gsoil_1429_(HM204925)	100	1	0	45	0	0		0	0.983569		0	-	-		100	16		0	0	0	0	1	0.581395	0.521739		OTU_47;size=45;	100	16
OTU_51	41	Root	Bacteria	Firmicutes		Clostridia		Clostridiales		Ruminococcaceae		Clostridium III		0.92	Clostridium_thermosuccinogenes_(T)_DSM_5807_(Y18180)	97.2	1	29	12	0	0		0.000833046	0.984402		-	-	32		100	109		1	0	0	1	1	0.568182	0.510638		OTU_51;size=41;	100	109
OTU_45	38	Root	Bacteria	Firmicutes		Clostridia		Clostridiales		Clostridiaceae 1		Clostridium sensu stricto		1	Clostridium_thermopalmarium_(T)_(X72869)	98	1	17	21	0	0		0.000488337	0.98489		-	-	17		100	13		1	0	0	1	1	0.555556	0.5		OTU_45;size=38;	100	13
OTU_46	36	Root	Archaea	Euryarchaeota		Methanomicrobia		Methanomicrobiales		Methanoregulaceae		Methanolinea		0.91	Methanolinea_mesophila_TNR_(AB447467)	96.5	1	6	19	11	0		0.000172354	0.985063		-	-	6		100	11		1	1	0	1	1	0.565217	0.489796		OTU_46;size=36;	100	11
OTU_49	33	Root	Archaea	Euryarchaeota		Methanobacteria		Methanobacteriales		Methanobacteriaceae		Methanobacterium		1	Methanobacterium_formicicum_(T)_DSM_1535_(AF169245)	99.6	1	33	0	0	0		0.000947949	0.986011		10	18	22906		100	39		0	0	0	1	0.978723	0.553191	0.480204		OTU_49;size=33;	100	39
OTU_50	31	Root	Bacteria	Proteobacteria		Epsilonproteobacteria		Campylobacterales		Campylobacteraceae		Sulfurospirillum		0.62	Sulfurospirillum_alkalitolerans_HTRB-L1_(GQ863490)	97.2	1	31	0	0	0		0.000890498	0.986901		2340	41	14011		0	0		0	0	0	0	0.978723	0.553191	0.470981		OTU_50;size=31;	0	0
OTU_52	29	Root	Archaea	Euryarchaeota		Methanomicrobia		Methanomicrobiales		Methanomicrobiales_incertae_sedis		Methanocalculus		1	Methanocalculus_pumilus_(T)_MHT-1_(AB008853)	99.6	1	29	0	0	0		0.000833046	0.987734		3312	30	10512		18	1		0	0	0	0	0.978723	0.553191	0.462106		OTU_52;size=29;	18	1
OTU_56	27	Root	Bacteria	Firmicutes		Clostridia		Clostridiales						0.84	Gracilibacter_thermotolerans_(T)_JW/YJL-S1_(DQ117465)	90.9	1	14	13	0	0		0.00040216	0.988136		18	-	276		97	263		1	0	0	1	0.979167	0.541667	0.453555		OTU_56;size=27;	97	263
OTU_48	26	Root	Bacteria	Firmicutes		Clostridia		Clostridiales		Syntrophomonadaceae		Syntrophomonas		0.94	Syntrophomonas_zehnderi_(T)_OL-4_(DQ898277)	94.5	1	2	24	0	0		5.74515e-05	0.988194		11	9	1108		100	11		1	0	0	1	0.979592	0.530612	0.445311		OTU_48;size=26;	100	11
OTU_54	24	Root	Bacteria	Firmicutes		Clostridia		Clostridiales				Vallitalea		0.66	Vallitalea_pronyensis_FatNI3_(KC876639)	96	1	17	7	0	0		0.000488337	0.988682		-	-	23		100	175		1	0	0	1	0.98	0.52	0.437358		OTU_54;size=24;	100	175
OTU_53	23	Root	Bacteria	Firmicutes		Clostridia		Clostridiales						0.85	Pelotomaculum_thermopropionicum_(T)_SI_(AB035723)	88.5	1	16	7	0	0		0.000459612	0.989142		-	-	16		100	145		1	0	0	1	0.980392	0.509804	0.429682		OTU_53;size=23;	100	145
OTU_55	22	Root	Bacteria	Chloroflexi		Anaerolineae		Anaerolineales		Anaerolineaceae		Ornatilinea		0.59	Ornatilinea_apprima_P3M-1_(JQ292916)	93.7	1	8	14	0	0		0.000229806	0.989371		796	4	799		97	7		1	0	0	1	0.980769	0.5	0.422267		OTU_55;size=22;	97	7
OTU_60	14	Root	Bacteria	Firmicutes		Clostridia		Clostridiales		Ruminococcaceae				0.5	Thermincola_carboxydiphila_(T)_2204_(AY603000)	89.3	1	14	0	0	0		0.00040216	0.989774		9	10	5160		16	599		0	0	0	0	0.980769	0.5	0.415104		OTU_60;size=14;	16	599
OTU_57	14	Root	Bacteria	Actinobacteria		Actinobacteria	Coriobacteridae	Coriobacteriales	Coriobacterineae	Coriobacteriaceae				0.59	Atopobium_vaginae_(T)_CCUG_38953_(Y17195)	88.5	1	14	0	0	0		0.00040216	0.990176		51	14	9732		23	1		0	0	0	0	0.980769	0.5	0.40818		OTU_57;size=14;	23	1
OTU_61	14	Root	Bacteria	Firmicutes		Clostridia		Clostridiales		Syntrophomonadaceae		Syntrophomonas		0.63	Pelospora_glutarica_(T)_WoGl3_(AJ251214)	96	1	11	3	0	0		0.000315983	0.990492		6	-	1842		100	9		1	0	0	1	0.981132	0.490566	0.40148		OTU_61;size=14;	100	9
OTU_69	13	Root	Bacteria	Proteobacteria		Betaproteobacteria		Rhodocyclales		Rhodocyclaceae		Thauera		0.98	Azoarcus_olearius_DQS-4_(EF158388)	99.2	1	13	0	0	0		0.000373434	0.990865		71	10	7416		4	1		0	0	0	0	0.981132	0.490566	0.394997		OTU_69;size=13;	4	1
OTU_64	12	Root	Bacteria	Firmicutes		Clostridia		Clostridiales		Ruminococcaceae		Clostridium III		0.72	[Clostridium]_caenicola_strain_EBR596_(NR_126170.1)	94.9	1	11	1	0	0		0.000315983	0.991181		-	-	469		100	44		1	0	0	1	0.981481	0.481481	0.388718		OTU_64;size=12;	100	44
OTU_59	12	Root	Bacteria	Firmicutes										0.84	Vallitalea_pronyensis_FatNI3_(KC876639)	88.5	1	0	12	0	0		0	0.991181		-	-	23		91	1032		0	0	0	0	0.981481	0.481481	0.382636		OTU_59;size=12;	91	1032
OTU_58	12	Root	Bacteria	Firmicutes		Clostridia		Natranaerobiales		Natranaerobiaceae		Dethiobacter		0.58	Dethiobacter_alkaliphilus_(T)_AHT_1_(EF422412)	89.7	1	12	0	0	0		0.000344709	0.991526		15	102	3869		22	59		0	0	0	0	0.981481	0.481481	0.37674		OTU_58;size=12;	22	59
OTU_62	11	Root	Bacteria											1	Desulfosporosinus_orientis_(T)_DSM_765_(Y11570)	89.7	3	11	0	0	0		0.000315983	0.991842		-	-	16		100	128		0	0	0	1	0.963636	0.472727	0.371127		OTU_62;size=11;	100	128
OTU_65	10	Root	Bacteria	Firmicutes		Bacilli		Bacillales		Bacillales_incertae_sedis		Desulfuribacillus		1	Desulfuribacillus_alkaliarsenatis_AHT28_(HM046584)	99.2	1	10	0	0	0		0.000287257	0.992129		-	-	22		100	146		0	0	0	1	0.946429	0.464286	0.365773		OTU_65;size=10;	100	146
OTU_68	10	Root	Bacteria	Firmicutes										0.72	Gelria_glutamica_(T)_TGO_(AF321086)	87.4	1	10	0	0	0		0.000287257	0.992416		8	4	905		84	105		0	0	0	0	0.946429	0.464286	0.360572		OTU_68;size=10;	84	105
OTU_72	10	Root	Bacteria											0.99	Thermodesulfovibrio_aggregans_(T)_TGE-P1_(AB021302)	87	1	10	0	0	0		0.000287257	0.992704		24	17120	17201		25	1		0	0	0	0	0.946429	0.464286	0.355517		OTU_72;size=10;	25	1
OTU_66	9	Root	Bacteria	Firmicutes		Clostridia		Clostridiales						0.84	Gracilibacter_thermotolerans_(T)_JW/YJL-S1_(DQ117465)	91.7	1	0	9	0	0		0	0.992704		18	-	276		100	222		0	0	0	0	0.946429	0.464286	0.350602		OTU_66;size=9;	100	222
OTU_71	9	Root	Bacteria	Firmicutes		Clostridia		Clostridiales		Gracilibacteraceae				0.5	Gracilibacter_thermotolerans_(T)_JW/YJL-S1_(DQ117465)	90.1	1	9	0	0	0		0.000258532	0.992962		18	-	276		100	127		0	0	0	1	0.929825	0.45614	0.345904		OTU_71;size=9;	100	127
OTU_114	9	Root	Bacteria	Ignavibacteriae		Ignavibacteria		Ignavibacteriales		Ignavibacteriaceae		Ignavibacterium		1	Ignavibacterium_album_(T)_Mat9-16_(AB478415)	99.6	1	9	0	0	0		0.000258532	0.993221		-	1089	3639		0	0		0	0	0	0	0.929825	0.45614	0.341329		OTU_114;size=9;	0	0
OTU_74	8	Root	Bacteria	Actinobacteria		Actinobacteria	Rubrobacteridae							0.56	Streptomyces_aomiensis_(T)_M24DS04_(AB522686)	89.3	3	8	0	0	0		0.000229806	0.993451		11	-	18		100	8		0	0	0	1	0.913793	0.448276	0.33695		OTU_74;size=8;	100	8
OTU_107	7	Root	Bacteria	Firmicutes		Clostridia		Thermoanaerobacterales		Thermoanaerobacteraceae				0.64	Syntrophaceticus_schinkii_(T)_Sp3_(EU386162)	90.5	1	7	0	0	0		0.00020108	0.993652		6	2871	2892		7	1178		0	0	0	0	0.913793	0.448276	0.332682		OTU_107;size=7;	7	1178
OTU_73	7	Root	Bacteria	Bacteroidetes										0.99	Cytophaga_fermentans_(T)_ATCC_19072_(M58766)	87.7	1	7	0	0	0		0.00020108	0.993853		9	5845	5880		25	9		0	0	0	0	0.913793	0.448276	0.328521		OTU_73;size=7;	25	9
OTU_63	7	Root	Bacteria	Chloroflexi		Anaerolineae		Anaerolineales		Anaerolineaceae		Ornatilinea		0.56	anaerobic_bacterium_MO-CFX1_(AB598277)	91.7	1	7	0	0	0		0.00020108	0.994054		-	-	58		100	5		0	0	0	1	0.898305	0.440678	0.32453		OTU_63;size=7;	100	5
OTU_67	7	Root	Archaea	Euryarchaeota		Methanobacteria		Methanobacteriales		Methanobacteriaceae		Methanobacterium		0.98	Methanobacterium_subterraneum_(T)_A8p,_DSM_11074_(X99044)	96.9	1	0	7	0	0		0	0.994054		6	29	7783		100	1176		0	0	0	0	0.898305	0.440678	0.320636		OTU_67;size=7;	100	1176
OTU_78	7	Root	Bacteria	Tenericutes		Mollicutes		Acholeplasmatales		Acholeplasmataceae		Acholeplasma		0.9	Acholeplasma_parvum_(T)_H23M_(AY538170)	92.9	1	7	0	0	0		0.00020108	0.994255		-	3	2033		0	0		0	0	0	0	0.898305	0.440678	0.316833		OTU_78;size=7;	0	0
OTU_110	7	Root	Bacteria	Firmicutes		Clostridia		Clostridiales						0.55	Desulfitobacterium_hafniense_(T)_DCB-2_(CP001336)	88.5	6	7	0	0	0		0.00020108	0.994456		-	-	29		100	127		0	0	0	1	0.883333	0.433333	0.313181		OTU_110;size=7;	100	127
OTU_117	7	Root	Bacteria	Firmicutes										0.96	Bacillaceae_bacterium_13CC_(JN571119)	90.9	1	7	0	0	0		0.00020108	0.994657		10	10	3140		30	407		0	0	0	0	0.883333	0.433333	0.309612		OTU_117;size=7;	30	407
OTU_88	7	Root	Bacteria	Firmicutes		Bacilli		Lactobacillales		Lactobacillaceae		Lactobacillus		1	Lactobacillus_gasseri_(T)_ATCC_33323_(AF519171)	100	4	7	0	0	0		0.00020108	0.994858		-	13	13		0	0		0	0	0	0	0.883333	0.433333	0.306124		OTU_88;size=7;	0	0
OTU_92	7	Root	Bacteria	Bacteroidetes		Bacteroidia		Bacteroidales		Porphyromonadaceae		Proteiniphilum		0.97	Proteiniphilum_acetatigenes_(T)_TB107_(AY742226)	98.4	1	7	0	0	0		0.00020108	0.995059		27	4	2600		0	0		0	0	0	0	0.883333	0.433333	0.302713		OTU_92;size=7;	0	0
OTU_96	6	Root	Bacteria	Firmicutes		Clostridia		Thermoanaerobacterales		Thermoanaerobacteraceae		Moorella		0.95	Moorella_glycerini_(T)_YS6_(U82327)	94.9	3	6	0	0	0		0.000172354	0.995232		-	3	6		89	102		0	0	0	0	0.883333	0.433333	0.299378		OTU_96;size=6;	89	102
OTU_75	6	Root	Bacteria	Firmicutes		Clostridia		Clostridiales		Eubacteriaceae		Alkalibacter		1	Alkalibacter_saccharofermentans_(T)_Z-79820_(AY312403)	100	1	6	0	0	0		0.000172354	0.995404		18	9	2300		13	931		0	0	0	0	0.883333	0.433333	0.296115		OTU_75;size=6;	13	931
OTU_79	6	Root	Bacteria	Firmicutes		Clostridia		Clostridiales						0.89	Desulfotomaculum_acetoxidans_(T)_DSM_771_(Y11566)	90.9	1	6	0	0	0		0.000172354	0.995576		-	2463	2474		43	289		0	0	0	0	0.883333	0.433333	0.292922		OTU_79;size=6;	43	289
OTU_80	6	Root	Bacteria											1	candidate_division_OP1_clone_OPB14_(AF027045)	89.7	1	6	0	0	0		0.000172354	0.995749		3	4057	4081		57	1		0	0	0	0	0.883333	0.433333	0.289798		OTU_80;size=6;	57	1
OTU_82	6	Root	Bacteria	Bacteroidetes										0.99	Cytophaga_xylanolytica_strain_DSM_6779_(NR_117112.1)	86.2	2	6	0	0	0		0.000172354	0.995921		-	6	2087		4	1		0	0	0	0	0.883333	0.433333	0.28674		OTU_82;size=6;	4	1
OTU_76	6	Root	Bacteria	Chloroflexi		Anaerolineae		Anaerolineales		Anaerolineaceae				0.65	Bellilinea_caldifistulae_(T)_GOMI-1_(AB243672)	87.7	1	6	0	0	0		0.000172354	0.996093		-	93	81		67	5		0	0	0	0	0.883333	0.433333	0.283745		OTU_76;size=6;	67	5
OTU_97	5	Root	Bacteria	Actinobacteria		Actinobacteria								0.51	Olegusella_massiliensis_strain_KHD7_(NR_146815.1)	90.1	1	5	0	0	0		0.000143629	0.996237		11	20	3418		0	0		0	0	0	0	0.883333	0.433333	0.280812		OTU_97;size=5;	0	0
OTU_90	5	Root	Bacteria	Bacteroidetes		Bacteroidia		Bacteroidales						0.72	Porphyromonas_pogonae_strain_MI_10-1288_(NR_136443.1)	86.2	1	5	0	0	0		0.000143629	0.996381		1059	29	6717		78	10		0	0	0	0	0.883333	0.433333	0.27794		OTU_90;size=5;	78	10
OTU_113	5	Root	Bacteria	Actinobacteria		Actinobacteria	Coriobacteridae	Coriobacteriales	Coriobacterineae	Coriobacteriaceae				0.56	Olegusella_massiliensis_strain_KHD7_(NR_146815.1)	89.3	1	5	0	0	0		0.000143629	0.996524		11	20	3418		39	1		0	0	0	0	0.883333	0.433333	0.275125		OTU_113;size=5;	39	1
OTU_85	5	Root	Bacteria	Proteobacteria		Deltaproteobacteria								0.5	Thiohalocapsa_marina_(T)_type_strain:_JA142_(AM491592)	89.7	1	5	0	0	0		0.000143629	0.996668		304	-	305		61	2		0	0	0	0	0.883333	0.433333	0.272367		OTU_85;size=5;	61	2
OTU_77	5	Root	Bacteria	Firmicutes		Bacilli		Lactobacillales		Lactobacillaceae		Lactobacillus		0.97	Lactobacillus_faecis_AFL13-2_(AB812750)	100	4	5	0	0	0		0.000143629	0.996811		-	7	30		0	0		0	0	0	0	0.883333	0.433333	0.269664		OTU_77;size=5;	0	0
OTU_103	5	Root	Bacteria	Tenericutes		Mollicutes		Acholeplasmatales		Acholeplasmataceae		Acholeplasma		0.99	Acholeplasma_parvum_(T)_H23M_(AY538170)	94.8	1	5	0	0	0		0.000143629	0.996955		-	3	2033		0	0		0	0	0	0	0.883333	0.433333	0.267014		OTU_103;size=5;	0	0
OTU_98	5	Root	Bacteria	Bacteroidetes										1	Natronoflexus_pectinivorans_AP1_(GQ922844)	88.5	2	5	0	0	0		0.000143629	0.997099		-	-	1534		0	0		0	0	0	0	0.883333	0.433333	0.264415		OTU_98;size=5;	0	0
OTU_106	5	Root	Bacteria	Firmicutes		Clostridia		Clostridiales						1	Natranaerovirga_pectinivora_(T)_AP3_(GQ922846)	94.9	1	5	0	0	0		0.000143629	0.997242		5	6	932		42	405		0	0	0	0	0.883333	0.433333	0.261867		OTU_106;size=5;	42	405
OTU_109	5	Root	Bacteria	Bacteroidetes		Bacteroidia		Bacteroidales		Porphyromonadaceae				0.9	Muribaculum_intestinale_strain_YL27_(NR_144616.1)	91.7	1	5	0	0	0		0.000143629	0.997386		5	6	6		3	46		0	0	0	0	0.883333	0.433333	0.259367		OTU_109;size=5;	3	46
OTU_104	5	Root	Bacteria	Bacteroidetes										0.98	Lutaonella_thermophila_(T)_CC-MHSW-2_(EU287913)	86.6	1	5	0	0	0		0.000143629	0.99753		15	5	1251		3	40		0	0	0	0	0.883333	0.433333	0.256914		OTU_104;size=5;	3	40
OTU_119	4	Root	Bacteria	Firmicutes		Clostridia		Clostridiales		Ruminococcaceae		Acetanaerobacterium		0.64	Acetanaerobacterium_elongatum_(T)_Z7_(AY487928)	91.7	1	4	0	0	0		0.000114903	0.997644		-	-	24		50	1		0	0	0	0	0.883333	0.433333	0.254508		OTU_119;size=4;	50	1
OTU_99	4	Root	Bacteria	Bacteroidetes		Bacteroidia		Bacteroidales		Porphyromonadaceae		Petrimonas		0.95	Lascolabacillus_massiliensis_strain_SIT8_(NR_144720.1)	97.2	1	4	0	0	0		0.000114903	0.997759		29	-	1018		0	0		0	0	0	0	0.883333	0.433333	0.252146		OTU_99;size=4;	0	0
OTU_87	4	Root	Bacteria	Firmicutes		Clostridia		Clostridiales						0.99	Defluviitalea_saccharophila_(T)_LIND6LT2_(HQ020487)	92.9	1	4	0	0	0		0.000114903	0.997874		-	-	-		62	156		0	0	0	0	0.883333	0.433333	0.249827		OTU_87;size=4;	62	156
OTU_86	4	Root	Bacteria	Firmicutes		Clostridia		Clostridiales		Clostridiales_Incertae Sedis XI		Tissierella		0.61	Soehngenia_saccharolytica_(T)_BOR-Y_(AY353956)	96.8	1	4	0	0	0		0.000114903	0.997989		4	2	767		7	40		0	0	0	0	0.883333	0.433333	0.247551		OTU_86;size=4;	7	40
OTU_94	4	Root	Bacteria	Proteobacteria		Gammaproteobacteria		Chromatiales						0.56	Spiribacter_salinus_M19-40_(CP005963)	92.9	2	4	0	0	0		0.000114903	0.998104		14	5	5401		0	0		0	0	0	0	0.883333	0.433333	0.245316		OTU_94;size=4;	0	0
OTU_93	4	Root	Bacteria	Bacteroidetes		Bacteroidia		Bacteroidales		Porphyromonadaceae		Acetobacteroides		0.54	Olivibacter_sitiensis_(T)_AW-6_(DQ421387)	86.2	1	4	0	0	0		0.000114903	0.998219		175	-	611		8	1112		0	0	0	0	0.883333	0.433333	0.243121		OTU_93;size=4;	8	1112
OTU_84	4	Root	Bacteria	Proteobacteria		Deltaproteobacteria		Desulfovibrionales		Desulfomicrobiaceae		Desulfomicrobium		1	Desulfomicrobium_apsheronum_(T)_DSM_5918_(U64865)	99.6	3	4	0	0	0		0.000114903	0.998334		-	-	107		8	2		0	0	0	0	0.883333	0.433333	0.240965		OTU_84;size=4;	8	2
OTU_91	4	Root	Bacteria	Firmicutes		Clostridia		Clostridiales		Ruminococcaceae		Clostridium III		0.9	Pseudobacteroides_cellulosolvens_(L35517)	95.7	3	4	0	0	0		0.000114903	0.998449		-	-	4		100	102		0	0	0	1	0.868852	0.42623	0.238881		OTU_91;size=4;	100	102
OTU_102	4	Root	Bacteria	Ignavibacteriae		Ignavibacteria		Ignavibacteriales		Ignavibacteriaceae		Melioribacter		0.81	Melioribacter_roseus_P3M-2_(JQ292917)	95.7	1	4	0	0	0		0.000114903	0.998564		6	5	1015		0	0		0	0	0	0	0.868852	0.42623	0.236833		OTU_102;size=4;	0	0
OTU_126	4	Root	Bacteria	Bacteroidetes		Flavobacteriia		Flavobacteriales						0.5	Cytophaga_fermentans_(T)_ATCC_19072_(M58766)	88.9	1	4	0	0	0		0.000114903	0.998679		9	5845	5880		0	0		0	0	0	0	0.868852	0.42623	0.234819		OTU_126;size=4;	0	0
OTU_112	4	Root	Bacteria	Firmicutes		Clostridia		Clostridiales		Clostridiales_Incertae Sedis XI		Dethiosulfatibacter		0.61	Dethiosulfatibacter_aminovorans_(T)_C/G2_(=_JCM_13356,_=_NBRC_101112,_=_DSM_17477)_(AB218661)	95.6	1	4	0	0	0		0.000114903	0.998794		230	-	231		14	899		0	0	0	0	0.868852	0.42623	0.23284		OTU_112;size=4;	14	899
OTU_122	4	Root	Bacteria	Bacteroidetes										0.99	Pedobacter_sp._MIC2002_(JX978785)	87	1	4	0	0	0		0.000114903	0.998908		13	18	4137		21	11		0	0	0	0	0.868852	0.42623	0.230894		OTU_122;size=4;	21	11
OTU_120	3	Root	Bacteria	Proteobacteria		Alphaproteobacteria		Rhodobacterales		Rhodobacteraceae				1	Paracoccus_aestuarii_(T)_B7_(EF660757)	99.2	7	3	0	0	0		8.61772e-05	0.998995		5	4	1524		32	1		0	0	0	0	0.868852	0.42623	0.22898		OTU_120;size=3;	32	1
OTU_89	3	Root	Bacteria	Bacteroidetes		Bacteroidia		Bacteroidales		Porphyromonadaceae				0.97	Muribaculum_intestinale_strain_YL27_(NR_144616.1)	93.7	1	3	0	0	0		8.61772e-05	0.999081		5	6	6		3	41		0	0	0	0	0.868852	0.42623	0.227097		OTU_89;size=3;	3	41
OTU_121	3	Root	Bacteria	Chloroflexi		Anaerolineae		Anaerolineales		Anaerolineaceae		Ornatilinea		1	Ornatilinea_apprima_P3M-1_(JQ292916)	99.6	1	3	0	0	0		8.61772e-05	0.999167		796	4	799		22	32		0	0	0	0	0.868852	0.42623	0.225245		OTU_121;size=3;	22	32
OTU_125	3	Root	Bacteria	Firmicutes		Clostridia		Clostridiales		Lachnospiraceae		Clostridium XlVa		1	Clostridium_saccharolyticum_(T)_DSM_2544_(Y18185)	100	1	3	0	0	0		8.61772e-05	0.999253		-	-	9		81	149		0	0	0	0	0.868852	0.42623	0.223424		OTU_125;size=3;	81	149
OTU_83	3	Root	Bacteria	Bacteroidetes		Bacteroidia		Bacteroidales		Porphyromonadaceae				0.85	Muribaculum_intestinale_strain_YL27_(NR_144616.1)	89.7	1	3	0	0	0		8.61772e-05	0.999339		5	6	6		0	0		0	0	0	0	0.868852	0.42623	0.221631		OTU_83;size=3;	0	0
OTU_81	3	Root	Bacteria	Bacteroidetes		Bacteroidia		Bacteroidales		Porphyromonadaceae		Coprobacter		0.5	Muribaculum_intestinale_strain_YL27_(NR_144616.1)	90.5	1	3	0	0	0		8.61772e-05	0.999425		5	6	6		2	54		0	0	0	0	0.868852	0.42623	0.219867		OTU_81;size=3;	2	54
OTU_111	2	Root	Bacteria	Bacteroidetes		Bacteroidia		Bacteroidales		Porphyromonadaceae		Odoribacter		0.99	Culturomica_massiliensis_strain_Marseille-P2698_(NR_144745.1)	93.3	1	2	0	0	0		5.74515e-05	0.999483		-	9	9		2	54		0	0	0	0	0.868852	0.42623	0.218131		OTU_111;size=2;	2	54
OTU_115	2	Root	Bacteria	Proteobacteria		Betaproteobacteria		Burkholderiales		Comamonadaceae		Hydrogenophaga		0.51	Hydrogenophaga_defluvii_(T)_type_strain:_BSB_9.5_(AJ585993)	98.8	3	2	0	0	0		5.74515e-05	0.99954		-	-	2		16	1		0	0	0	0	0.868852	0.42623	0.216421		OTU_115;size=2;	16	1
OTU_100	2	Root	Bacteria	Bacteroidetes		Bacteroidia		Bacteroidales		Porphyromonadaceae				0.98	Muribaculum_intestinale_strain_YL27_(NR_144616.1)	96.4	1	2	0	0	0		5.74515e-05	0.999598		5	6	6		0	0		0	0	0	0	0.868852	0.42623	0.214739		OTU_100;size=2;	0	0
OTU_108	2	Root	Bacteria	Bacteroidetes		Bacteroidia		Bacteroidales		Porphyromonadaceae				0.84	Muribaculum_intestinale_strain_YL27_(NR_144616.1)	89.3	1	2	0	0	0		5.74515e-05	0.999655		5	6	6		0	0		0	0	0	0	0.868852	0.42623	0.213083		OTU_108;size=2;	0	0
OTU_95	2	Root	Bacteria	Firmicutes		Clostridia		Clostridiales		Clostridiaceae 2		Alkaliphilus		0.87	Alkaliphilus_peptidifermentans_(T)_Z-7036_(EF382660)	98.8	1	2	0	0	0		5.74515e-05	0.999713		-	-	259		47	690		0	0	0	0	0.868852	0.42623	0.211451		OTU_95;size=2;	47	690
OTU_118	2	Root	Bacteria	Firmicutes										0.59	*	0	1	2	0	0	0		5.74515e-05	0.99977		-	-	-		0	0		0	0	0	0	0.868852	0.42623	0.209845		OTU_118;size=2;	0	0
OTU_105	2	Root	Bacteria	Proteobacteria		Gammaproteobacteria		Pseudomonadales		Moraxellaceae		Acinetobacter		1	Acinetobacter_indicus_(T)_A648_(HM047743)	100	1	2	0	0	0		5.74515e-05	0.999828		-	-	2		86	1		0	0	0	0	0.868852	0.42623	0.208263		OTU_105;size=2;	86	1
OTU_123	2	Root	Bacteria	Bacteroidetes		Bacteroidia		Bacteroidales		Porphyromonadaceae		Coprobacter		0.51	Muribaculum_intestinale_strain_YL27_(NR_144616.1)	94.8	1	2	0	0	0		5.74515e-05	0.999885		5	6	6		3	46		0	0	0	0	0.868852	0.42623	0.206704		OTU_123;size=2;	3	46
OTU_124	2	Root	Bacteria	Proteobacteria		Deltaproteobacteria		Syntrophobacterales		Syntrophaceae		Syntrophus		0.75	Smithella_propionica_(T)_LYP_(AF126282)	95.3	1	2	0	0	0		5.74515e-05	0.999943		77	220	577		17	20		0	0	0	0	0.868852	0.42623	0.205169		OTU_124;size=2;	17	20
OTU_101	2	Root	Bacteria	Firmicutes		Clostridia		Clostridiales		Clostridiales_Incertae Sedis XI		Sedimentibacter		1	Sedimentibacter_saalensis_(T)_ZF2_(AJ404680)	99.6	1	2	0	0	0		5.74515e-05	1		-	-	473		17	745		0	0	0	0	0.868852	0.42623	0.203656		OTU_101;size=2;	17	745
OTU_116	2	Root	Bacteria	Bacteroidetes		Bacteroidia		Bacteroidales		Porphyromonadaceae				0.97	Muribaculum_intestinale_strain_YL27_(NR_144616.1)	93.7	1	2	0	0	0		5.74515e-05	1.00006		5	6	6		3	46			0	0	0	0.868852	0.42623	0.202166		OTU_116;size=2;	3	46

## Sheet: AE summary
Summary statistics for AE tables (Amplicon & Extended)
	W1 amplicon	W1 extended	W2 amplicon	W2 amplicon	W3 amplicon	W3 extended		0.98		W1	W2	W3		0.99		W1	W2	W3		0.98	W1	W2	W3			0.99	W1	W2	W3
0.98	30	30	22	22	36	36			amplicon	30	22	36			amplicon	48	33	53		amplicon	30	22	36			amplicon	48	33	53
0.99	48	38	33	29	53	50			WGS extended	30	22	36			WGS extended	38	29	50		amplicon (adj)	30	22	36			amplicon (adj)	44	29	51
																				WGS extended	30	22	36			WGS extended	38	29	50
																				WGS extended (adj)	30	22	36			WGS extended (adj)	39	29	51
Adjusted for poor WGS support (<80% coverage), and well-supported WGS extensions.
	W1 amplicon	W1 extended	W2 amplicon	W2 amplicon	W3 amplicon	W3 extended		0.98		W1	W2	W3		0.99		W1	W2	W3
0.98	30	30	22	22	36	36			amplicon	30	22	36			amplicon	44	29	51
0.99	44	39	29	29	51	51			WGS extended	30	22	36			WGS extended	39	29	51
Adjustments	W1 amplicon	W1 extended	W2 amplicon	W2 amplicon	W3 amplicon	W3 extended
A errors
0.98
0.99	4		4		2
not in A
0.98
0.99		1				1
										`

## Sheet: AE-All
																		42924	19592	46029	15848	34899	23059		182351
OTU	Size	RDP classification												Confidence	Species	Match%	Match#	W1 amplicon	W1 extended	W2 amplicon	W2 extended	W3 amplicon	W3 extended		amplicon reads %	cumulative		W1 WGS coverage	W2 WGS coverage	W3 WGS coverage		Max across all samples		Kelpie	Possible	Achieved
OTU_1	43603	Root	Bacteria	Proteobacteria		Deltaproteobacteria		Desulfuromonadales		Desulfuromonadaceae		Desulfuromonas		0.91	Desulfuromonas_acetexigens_(T)_(U23140)	96.8	1	27333	13574	132	0	1554	1010		0.239116	0.239116		100	77	100		27497		1	1	1
OTU_2	24970	Root	Bacteria											0.99	Thermodesulfovibrio_aggregans_(T)_TGE-P1_(AB021302)	87	1	24	0	17120	7816	10	0		0.136934	0.376049		84	100	25		17201		1	1	1
OTU_3	10514	Root	Bacteria	Spirochaetes		Spirochaetia		Spirochaetales		Spirochaetaceae				0.57	Treponema_zuelzerae_(T)_type_strain:_DSM_1903;_2_(FR749929)	85.8	1	13	0	1171	305	5956	3069		0.057658	0.433708		0	100	100		5986		1	1	1
OTU_4	10163	Root	Archaea	Euryarchaeota		Methanobacteria		Methanobacteriales		Methanobacteriaceae		Methanobacterium		1	Methanobacterium_subterraneum_(T)_A8p,_DSM_11074_(X99044)	100	1	5	0	29	0	7736	2393		0.0557332	0.489441		0	32	100		7783		1	1	1
OTU_5	7081	Root	Bacteria	Bacteroidetes										0.99	Cytophaga_fermentans_(T)_ATCC_19072_(M58766)	87.7	1	9	0	5845	1220	7	0		0.0388317	0.528272		2	100	25		5880		1	1	1
OTU_7	6514	Root	Archaea	Euryarchaeota		Methanomicrobia		Methanosarcinales		Methanotrichaceae		Methanothrix		1	Methanosaeta_harundinacea_(T)_8Ac_(AY817738)	97.2	1	1032	192	16	0	3332	1942		0.0357223	0.563995		100	60	100		11703		1	1	1
OTU_6	6264	Root	Bacteria	Bacteroidetes		Bacteroidia		Bacteroidales		Porphyromonadaceae				0.67	Parabacteroides_distasonis_(T)_JCM_5825_(AB238922)	85.8	1	1270	271	9	0	3116	1598		0.0343513	0.598346		100	0	100		3129		1	1	1
OTU_8	5520	Root	Bacteria	Firmicutes		Clostridia								0.58	Thermacetogenium_phaeum_(T)_PB_(AB020336)	87	1	5	0	14	0	3285	2216		0.0302713	0.628617		13	14	100		3303		1	1	1
OTU_10	4837	Root	Bacteria											1	candidate_division_OP1_clone_OPB14_(AF027045)	89.7	1	3	0	4057	771	6	0		0.0265258	0.655143		6	100	57		4081		1	1	1
OTU_12	4611	Root	Bacteria	Firmicutes		Negativicutes		Selenomonadales		Veillonellaceae				0.53	Lysinibacillus_sp._LAM612_(KF443809)	88.5	2	3	0	7	0	533	4068		0.0252864	0.68043		7	31	100		945		1	1	1
OTU_9	4258	Root	Archaea	Euryarchaeota		Methanomicrobia		Methanosarcinales		Methanosarcinaceae		Methanosarcina		1	Methanosarcina_siciliae_type_strain:_DSM3028_(FR733698)	100	7	1238	2733	11	0	54	222		0.0233506	0.70378		100	39	100		2085		1	1	1
OTU_13	3847	Root	Archaea	Euryarchaeota		Methanomicrobia		Methanomicrobiales		Methanomicrobiales_incertae_sedis		Methanocalculus		1	Methanocalculus_pumilus_(T)_MHT-1_(AB008853)	99.6	1	3312	476	30	0	29	0		0.0210967	0.724877		100	25	18		10512		1	1	1
OTU_11	3652	Root	Bacteria	Firmicutes		Clostridia		Clostridiales						0.89	Desulfotomaculum_acetoxidans_(T)_DSM_771_(Y11566)	90.9	1	6	0	2463	1177	6	0		0.0200273	0.744904		17	100	43		2474		1	1	1
OTU_14	3390	Root	Bacteria	Firmicutes		Clostridia		Thermoanaerobacterales		Thermoanaerobacteraceae				0.64	Syntrophaceticus_schinkii_(T)_Sp3_(EU386162)	90.5	1	6	0	2871	506	7	0		0.0185905	0.763495		33	100	7		2892		1	1	1
OTU_15	3383	Root	Archaea	Euryarchaeota		Methanobacteria		Methanobacteriales		Methanobacteriaceae		Methanobacterium		1	Methanobacterium_aarhusense_(T)_H2-LR_(AY386124)	99.6	1	1	0	3104	271	7	0		0.0185521	0.782047		5	100	46		3131		1	1	1
OTU_17	3012	Root	Archaea	Euryarchaeota		Methanobacteria		Methanobacteriales		Methanobacteriaceae		Methanothermobacter		1	Methanothermobacter_thermoflexus_(T)_IDZ,_VKM_B-1963,_DSM_7268_(X99047)	100	7	1	0	2685	326	0	0		0.0165176	0.798564		5	100	10		2705		1	1	1
OTU_16	2920	Root	Bacteria	Proteobacteria		Epsilonproteobacteria		Campylobacterales		Campylobacteraceae		Sulfurospirillum		0.62	Sulfurospirillum_alkalitolerans_HTRB-L1_(GQ863490)	97.2	1	2340	508	41	0	31	0		0.0160131	0.814577		100	2	0		14011		1	1	1
OTU_21	2114	Root	Archaea	Euryarchaeota		Methanobacteria		Methanobacteriales		Methanobacteriaceae		Methanobacterium		0.9	Methanobacterium_alcaliphilum_(T)_NBRC_105226_(AB496639)	100	2	2	0	1161	100	586	265		0.011593	0.82617		40	100	100		1168		1	1	1
OTU_18	2099	Root	Bacteria	Firmicutes		Clostridia		Clostridiales						0.85	Clostridium_hungatei_(T)_AD;_ATCC_700212_(AF020429)	91.3	1	5	0	5	0	1124	965		0.0115108	0.837681		9	9	100		1132		1	1	1
OTU_20	2067	Root	Bacteria	Firmicutes		Clostridia		Clostridiales		Clostridiaceae 2		Natronincola		0.87	Natronincola_peptidivorans_(T)_Z-7031_(EF382661)	99.2	1	12	0	8	0	1293	754		0.0113353	0.849016		64	8	100		1299		1	1	1
OTU_19	1955	Root	Bacteria	Bacteroidetes		Bacteroidia		Bacteroidales		Porphyromonadaceae				0.5	Pontibacter_sp._JC215_A10_(HG008901)	85.8	1	4	0	2	0	931	1018		0.0107211	0.859738		99	18	100		943		1	1	1
OTU_23	1734	Root	Bacteria	Bacteroidetes		Bacteroidia		Bacteroidales						0.61	Porphyromonas_pogonae_strain_MI_10-1288_(NR_136443.1)	86.2	2	1059	128	29	0	389	129		0.00950913	0.869247		100	2	100		6717		1	1	1
OTU_25	1557	Root	Bacteria	Firmicutes		Clostridia		Clostridiales		Eubacteriaceae		Acetobacterium		1	Acetobacterium_malicum_(T)_DSM_4132_(X96957)	100	3	929	304	16	0	153	155		0.00853848	0.877785		100	1	100		2442		1	1	1
OTU_22	1515	Root	Bacteria	Proteobacteria		Deltaproteobacteria		Desulfovibrionales		Desulfovibrionaceae		Desulfovibrio		1	Desulfovibrio_oxamicus_(T)_DSM_1925_(DQ122124)	100	1	19	10	2	0	860	624		0.00830815	0.886093		75	19	100		866		1	1	1
OTU_24	1513	Root	Bacteria											0.95	*	0	1	2	0	955	556	0	0		0.00829719	0.89439		0	100	0		-		1	1	1
OTU_26	1507	Root	Bacteria	Ignavibacteriae		Ignavibacteria		Ignavibacteriales		Ignavibacteriaceae		Ignavibacterium		1	Ignavibacterium_album_(T)_Mat9-16_(AB478415)	99.6	1	1	0	1089	408	9	0		0.00826428	0.902655		0	100	0		3639		1	1	1
OTU_28	1165	Root	Bacteria	Nitrospirae		Nitrospira		Nitrospirales		Nitrospiraceae		Thermodesulfovibrio		1	Thermodesulfovibrio_aggregans_(T)_TGE-P1_(AB021302)	96.4	1	2	0	722	440	1	0		0.00638878	0.909044		0	100	0		17201		1	1	1
OTU_32	1055	Root	Bacteria	Chloroflexi		Anaerolineae		Anaerolineales		Anaerolineaceae		Ornatilinea		0.94	Ornatilinea_apprima_P3M-1_(JQ292916)	89.7	1	796	254	3	0	2	0		0.00578555	0.914829		100	31	6		799		1	1	1
OTU_27	977	Root	Bacteria	Firmicutes		Clostridia								0.84	Moorella_humiferrea_(T)_64_FGQ_(GQ872425)	88.9	2	1	0	129	847	0	0		0.0053578	0.920187		15	100	40		128		1	1	1
OTU_29	844	Root	Bacteria	Firmicutes		Clostridia		Clostridiales						0.8	Caldicoprobacter_guelmensis_(T)_D2C22_(JQ707908)	91.3	2	17	0	7	0	477	343		0.00462844	0.924815		97	46	100		780		1	1	1
OTU_30	694	Root	Bacteria	Proteobacteria		Deltaproteobacteria		Syntrophobacterales		Syntrophobacteraceae		Syntrophobacter		1	Syntrophobacter_sulfatireducens_(T)_TB8106_(AY651787)	100	1	219	65	17	0	254	139		0.00380585	0.928621		100	100	100		255		1	1	1
OTU_34	587	Root	Bacteria	Proteobacteria		Deltaproteobacteria		Desulfovibrionales		Desulfovibrionaceae		Desulfovibrio		1	Desulfovibrio_alkalitolerans_(T)_RT2_(AY649785)	99.2	1	108	23	4	0	429	23		0.00321907	0.93184		100	0	100		762		1	1	1
OTU_31	586	Root	Bacteria	Proteobacteria		Alphaproteobacteria		Rhodospirillales		Rhodospirillaceae				0.67	Magnetospira_thiophila_(T)_MMS-1_(EU861390)	90.1	1	6	0	5	0	290	285		0.00321358	0.935054		100	0	100		469		1	1	1
OTU_33	566	Root	Bacteria	Bacteroidetes		Bacteroidia		Bacteroidales		Prolixibacteraceae				0.87	Sunxiuqinia_faeciviva_(T)_JAM-BA0302_(AB362263)	91.7	1	53	13	111	82	119	188		0.0031039	0.938158		100	100	100		1118		1	1	1
OTU_49	485	Root	Bacteria	Firmicutes		Negativicutes		Selenomonadales		Veillonellaceae		Sporomusa		0.95	Sporomusa_ovata_strain_DSM_2662_(NR_117659.1)	98	4	1	0	0	0	309	175		0.00265971	0.940817		25	21	100		313		1	1	1
OTU_35	472	Root	Bacteria											0.92	*	0	1	0	0	259	211	2	0		0.00258841	0.943406		0	100	0		-		1	1	1
OTU_36	407	Root	Bacteria	Proteobacteria		Deltaproteobacteria								0.5	Thiohalocapsa_marina_(T)_type_strain:_JA142_(AM491592)	89.7	1	304	98	0	0	5	0		0.00223196	0.945638		100	0	61		305		1	1	1
OTU_37	395	Root	Bacteria	Proteobacteria		Deltaproteobacteria		Syntrophobacterales		Syntrophaceae		Smithella		0.97	Smithella_propionica_(T)_LYP_(AF126282)	98	1	7	0	217	65	81	25		0.00216615	0.947804		44	100	100		577		1	1	1
OTU_165	365	Root	Bacteria	Bacteroidetes										0.87	*	0	1	1	0	264	100	0	0		0.00200163	0.949806		18	98	18		-		1	1	1
OTU_38	348	Root	Bacteria	Firmicutes		Clostridia		Clostridiales		Clostridiales_Incertae Sedis XI				0.77	Dethiosulfatibacter_aminovorans_(T)_C/G2_(=_JCM_13356,_=_NBRC_101112,_=_DSM_17477)_(AB218661)	94.8	1	230	115	0	0	3	0		0.00190841	0.951714		100	9	14		231		1	1	1
OTU_54	346	Root	Bacteria	Firmicutes		Clostridia		Natranaerobiales		Natranaerobiaceae		Dethiobacter		0.95	Dethiobacter_alkaliphilus_(T)_AHT_1_(EF422412)	96	1	4	0	43	84	116	99		0.00189744	0.953611		9	54	100		3869		1	1	1
OTU_39	292	Root	Bacteria	Synergistetes		Synergistia		Synergistales		Synergistaceae		Aminiphilus		1	Aminiphilus_circumscriptus_(T)_ILE-2_(AY642589)	99.6	1	205	82	2	0	3	0		0.00160131	0.955213		100	16	100		205		1	1	1
OTU_40	271	Root	Bacteria	Proteobacteria		Gammaproteobacteria		Pseudomonadales		Pseudomonadaceae		Pseudomonas		0.99	Pseudomonas_songnenensis_strain_NEAU-ST5-5_(NR_148295.1)	100	2	6	0	1	0	138	126		0.00148614	0.956699		56	0	100		1109		1	1	1
OTU_41	265	Root	Bacteria	Firmicutes		Clostridia		Clostridiales		Peptococcaceae 1		Desulfitobacterium		0.9	Desulfitobacterium_metallireducens_(T)_853-15A_(AF297871)	97.6	1	0	0	1	0	146	118		0.00145324	0.958152		14	21	100		148		1	1	1
OTU_46	259	Root	Bacteria	Firmicutes		Clostridia		Clostridiales		Peptococcaceae 2		Pelotomaculum		0.95	Pelotomaculum_propionicicum_(T)_MGP_(AB154390)	99.2	1	4	0	188	67	0	0		0.00142034	0.959572		7	100	8		1186		1	1	1
OTU_43	257	Root	Bacteria	Firmicutes		Clostridia		Clostridiales		Peptococcaceae 1		Desulfitibacter		1	Desulfitibacter_alkalitolerans_(T)_sk.kt5_(AY538171)	98.8	1	0	0	2	0	181	74		0.00140937	0.960982		16	12	100		520		1	1	1
OTU_58	244	Root	Bacteria	Chloroflexi		Anaerolineae		Anaerolineales		Anaerolineaceae		Bellilinea		1	Bellilinea_caldifistulae_(T)_GOMI-1_(AB243672)	98.8	1	2	0	93	48	51	50		0.00133808	0.96232		15	100	64		81		1	1	1
OTU_45	232	Root	Bacteria											0.94	*	0	1	161	70	1	0	0	0		0.00127227	0.963592		100	0	25		-		1	1	1
OTU_47	219	Root	Bacteria	Firmicutes		Clostridia		Clostridiales		Ruminococcaceae		Ercella		0.85	Ruminococcaceae_bacterium_ZWB_4_(HG003571)	96	1	169	47	2	0	1	0		0.00120098	0.964793		100	0	45		245		1	1	1
OTU_50	212	Root	Bacteria	Bacteroidetes		Bacteroidia		Bacteroidales		Porphyromonadaceae		Acetobacteroides		0.54	Olivibacter_sitiensis_(T)_AW-6_(DQ421387)	86.2	1	175	33	0	0	4	0		0.00116259	0.965956		100	0	8		611		1	1	1
OTU_42	210	Root	Bacteria	Bacteroidetes		Bacteroidia		Bacteroidales		Bacteroidaceae		Anaerorhabdus		0.6	Dielma_fastidiosa_strain_JC13_(NR_125593.1)	92.5	1	0	0	0	0	32	178		0.00115163	0.967107		0	0	100		35		1	1	1
OTU_48	208	Root	Bacteria	Firmicutes		Clostridia		Clostridiales		Syntrophomonadaceae		Syntrophomonas		1	Syntrophomonas_bryantii_type_strain:_DSM_3014_(HE654006)	96.8	1	53	21	4	0	61	69		0.00114066	0.968248		100	0	100		439		1	1	1
OTU_44	203	Root	Archaea	Euryarchaeota		Methanomicrobia		Methanomicrobiales		Methanospirillaceae		Methanospirillum		1	Methanospirillum_hungatei_strain_JF-1_(NR_074177.1)	98.4	2	67	135	0	0	1	0		0.00111324	0.969361		100	0	0		465		1	1	1
OTU_196	193	Root	Bacteria	Firmicutes		Clostridia		Clostridiales						0.75	Caldicoprobacter_algeriensis_TH7C1_(GU216701)	92.1	2	0	0	133	60	0	0		0.0010584	0.97042		40	93	43		132		1	1	1
OTU_53	192	Root	Bacteria	Bacteroidetes										1	Marivirga_sericea_(T)_IFO_15983_(AB078081)	87	3	125	58	8	0	1	0		0.00105291	0.971473		100	2	2		257		1	1	1
OTU_51	192	Root	Bacteria	Synergistetes		Synergistia		Synergistales		Synergistaceae		Aminivibrio		0.68	Aminivibrio_pyruvatiphilus_4F6E_(AB623229)	91.7	1	128	62	2	0	0	0		0.00105291	0.972526		100	1	0		128		1	1	1
OTU_52	184	Root	Bacteria	Nitrospirae		Nitrospira		Nitrospirales		Nitrospiraceae		Thermodesulfovibrio		1	Thermodesulfovibrio_yellowstonii_(T)_YP87_(AB231858)	100	1	0	0	107	77	0	0		0.00100904	0.973535		0	100	0		109		1	1	1
OTU_166	175	Root	Bacteria	Proteobacteria		Deltaproteobacteria		Syntrophobacterales		Syntrophaceae		Smithella		0.99	Smithella_propionica_(T)_LYP_(AF126282)	97.6	1	84	33	4	0	29	25		0.000959688	0.974494		90	38	90		577		1	1	1
OTU_62	175	Root	Bacteria	Proteobacteria		Deltaproteobacteria				Syntrophorhabdaceae		Syntrophorhabdus		1	Syntrophorhabdus_aromaticivorans_(T)_UI_(AB212873)	97.2	1	25	3	47	19	25	56		0.000959688	0.975454		100	69	100		1516		1	1	1
OTU_56	157	Root	Bacteria	Firmicutes										0.96	Clostridium_thermocellum_(T)_ATCC_27405_(CP000568)	92.5	5	0	0	2	0	106	49		0.000860977	0.976315		11	13	100		106		1	1	1
OTU_55	149	Root	Bacteria	Chloroflexi		Anaerolineae		Anaerolineales		Anaerolineaceae				0.69	Thermanaerothrix_daxensis_strain_GNS-1_(NR_117865.1)	87.4	2	0	0	70	79	0	0		0.000817105	0.977132		0	100	0		54		1	1	1
OTU_57	148	Root	Bacteria	Chloroflexi		Anaerolineae		Anaerolineales		Anaerolineaceae		Ornatilinea		1	Ornatilinea_apprima_P3M-1_(JQ292916)	99.6	1	109	34	2	0	3	0		0.000811622	0.977944		100	17	22		799		1	1	1
OTU_61	125	Root	Bacteria	Proteobacteria		Deltaproteobacteria				Syntrophorhabdaceae		Syntrophorhabdus		0.99	Syntrophorhabdus_aromaticivorans_(T)_UI_(AB212873)	94.9	1	7	0	2	0	82	34		0.000685491	0.978629		99	18	100		1516		1	1	1
OTU_63	120	Root	Bacteria	Bacteroidetes		Bacteroidia		Bacteroidales		Porphyromonadaceae		Petrimonas		1	Petrimonas_sulfuriphila_(T)_BN3_(AY570690)	100	1	104	16	0	0	0	0		0.000658072	0.979287		100	0	0		465		1	1	1
OTU_64	118	Root	Bacteria	Proteobacteria		Deltaproteobacteria		Desulfuromonadales		Geobacteraceae		Geoalkalibacter		0.94	Geoalkalibacter_ferrihydriticus_(T)_Z-0531_(DQ309326)	96.8	1	4	0	2	0	61	51		0.000647104	0.979934		10	25	100		523		1	1	1
OTU_59	118	Root	Bacteria	Spirochaetes		Spirochaetia		Spirochaetales		Spirochaetaceae		Spirochaeta		0.51	Spirochaeta_smaragdinae_(T)_SEBR_4228;_DSM_11293_(U80597)	88.1	1	4	0	0	0	61	53		0.000647104	0.980581		48	0	100		61		1	1	1
OTU_60	116	Root	Bacteria	Firmicutes		Clostridia		Clostridiales		Clostridiaceae 1		Clostridium sensu stricto		1	Clostridium_luticellarii_strain_FW431_(NR_145907.1)	98.4	1	0	0	0	0	53	63		0.000636136	0.981218		3	0	100		53		1	1	1
OTU_204	114	Root	Bacteria	Firmicutes		Clostridia		Natranaerobiales		Natranaerobiaceae		Dethiobacter		0.84	Dethiobacter_alkaliphilus_(T)_AHT_1_(EF422412)	95.3	1	1	0	63	30	15	5		0.000625168	0.981843		9	93	92		3869		1	1	1
OTU_68	112	Root	Bacteria	Proteobacteria		Betaproteobacteria		Rhodocyclales		Rhodocyclaceae		Thauera		0.98	Azoarcus_olearius_DQS-4_(EF158388)	99.2	1	71	18	10	0	13	0		0.0006142	0.982457		100	0	4		7416		1	1	1
OTU_65	101	Root	Bacteria	Firmicutes		Clostridia								0.65	Dethiobacter_alkaliphilus_(T)_AHT_1_(EF422412)	91.7	1	0	0	58	41	2	0		0.000553877	0.983011		3	100	8		3869		1	1	1
OTU_66	92	Root	Bacteria	Proteobacteria		Deltaproteobacteria		Syntrophobacterales		Syntrophaceae		Smithella		0.58	Smithella_propionica_(T)_LYP_(AF126282)	92.5	2	59	32	1	0	0	0		0.000504521	0.983515		100	18	18		577		1	1	1
OTU_67	86	Root	Bacteria	Firmicutes		Clostridia								0.67	Desulfotomaculum_kuznetsovii_strain_17_(NR_115129.1)	89.7	2	0	0	50	35	1	0		0.000471618	0.983987		0	100	0		50		1	1	1
OTU_76	83	Root	Bacteria	Proteobacteria		Deltaproteobacteria		Syntrophobacterales		Syntrophaceae		Syntrophus		0.75	Smithella_propionica_(T)_LYP_(AF126282)	95.3	1	54	24	3	0	2	0		0.000455166	0.984442		100	11	17		577		1	1	1
OTU_71	79	Root	Bacteria	Actinobacteria		Actinobacteria	Coriobacteridae	Coriobacteriales	Coriobacterineae	Coriobacteriaceae				0.59	Atopobium_vaginae_(T)_CCUG_38953_(Y17195)	88.5	1	51	0	14	0	14	0		0.00043323	0.984875		47	31	23		9732		0	0	1
OTU_69	78	Root	Bacteria	Firmicutes		Clostridia		Clostridiales						0.73	*	0	1	43	35	0	0	0	0		0.000427746	0.985303		100	9	9		-		1	1	1
OTU_70	77	Root	Bacteria	Bacteroidetes										0.96	Crocinitomix_catalasitica_(T)_IFO_15977_(AB078042)	88.1	4	38	37	2	0	0	0		0.000422263	0.985725		100	0	0		242		1	1	1
OTU_72	75	Root	Bacteria	Firmicutes		Clostridia		Clostridiales		Ruminococcaceae		Ercella		0.99	Ruminococcaceae_bacterium_ZWB_4_(HG003571)	100	1	4	0	1	0	46	24		0.000411295	0.986137		91	0	100		245		1	1	1
OTU_74	72	Root	Bacteria											1	uncultured_bacterium_KF-JG30-18_(AJ295656)	90.1	1	0	0	44	28	0	0		0.000394843	0.986531		2	100	1		44		1	1	1
OTU_73	72	Root	Bacteria	Firmicutes		Clostridia		Clostridiales		Clostridiales_Incertae Sedis III		Tepidanaerobacter		0.99	Tepidanaerobacter_syntrophicus_(T)_JL_(AB106353)	95.7	1	0	0	0	0	32	40		0.000394843	0.986926		69	0	100		51		1	1	1
OTU_75	66	Root	Bacteria	Chloroflexi		Anaerolineae		Anaerolineales		Anaerolineaceae				0.99	Leptolinea_tardivitalis_(T)_YMTK-2_(AB109438)	93.7	1	0	0	29	37	0	0		0.000361939	0.987288		0	100	0		18		1	1	1
OTU_199	65	Root	Bacteria	Synergistetes		Synergistia		Synergistales		Synergistaceae		Aminivibrio		0.9	Aminivibrio_pyruvatiphilus_4F6E_(AB623229)	91.7	1	60	5	0	0	0	0		0.000356455	0.987645		93	1	0		128		1	1	1
OTU_79	65	Root	Bacteria	Firmicutes		Clostridia		Thermoanaerobacterales		Thermoanaerobacteraceae				0.55	Thermoanaerobacter_pseudethanolicus_ATCC_33223_(CP000924)	89.7	2	0	0	6	0	33	26		0.000356455	0.988001		15	100	100		33		1	1	1
OTU_83	61	Root	Archaea	Euryarchaeota		Methanobacteria		Methanobacteriales		Methanobacteriaceae		Methanobacterium		1	Methanobacterium_formicicum_(T)_DSM_1535_(AF169245)	99.6	1	10	0	18	0	33	0		0.00033452	0.988336		0	14	100		22906		0	1	0.987805
OTU_78	60	Root	Bacteria	Firmicutes		Negativicutes		Selenomonadales		Veillonellaceae				0.83	Veillonella_magna_(T)_lac18_(EU096495)	89.3	1	5	0	0	0	28	27		0.000329036	0.988665		24	0	100		28		1	1	0.987952
OTU_99	58	Root	Bacteria	Firmicutes		Clostridia		Clostridiales		Ruminococcaceae		Clostridium III		0.92	Clostridium_thermosuccinogenes_(T)_DSM_5807_(Y18180)	97.2	1	11	6	0	0	29	12		0.000318068	0.988983		54	15	100		32		1	1	0.988095
OTU_80	58	Root	Bacteria	Chloroflexi		Anaerolineae		Anaerolineales		Anaerolineaceae				0.63	Longilinea_arvoryzae_(T)_KOME-1_(AB243673)	86.6	2	0	0	1	0	22	35		0.000318068	0.989301		0	21	100		22		1	1	0.988235
OTU_81	52	Root	Bacteria	Acidobacteria		Acidobacteria_Gp3						Gp3		0.69	Acidobacteria_bacterium_P105_(KJ461654)	96	1	0	0	31	21	0	0		0.000285164	0.989586		0	100	0		31		1	1	0.988372
OTU_82	52	Root	Bacteria	Firmicutes		Clostridia		Clostridiales						0.94	Clostridium_putrificum_(T)_DSM_1734_(X73442)	92.1	1	23	23	4	0	2	0		0.000285164	0.989871		100	18	22		469		1	1	0.988506
OTU_85	52	Root	Bacteria	Firmicutes		Clostridia		Clostridiales						0.52	Desulfotomaculum_varum_RH04-3_(GU126374)	88.2	1	2	0	0	0	39	11		0.000285164	0.990156		23	0	100		50		1	1	0.988636
OTU_77	51	Root	Bacteria											0.99	*	0	1	0	0	0	0	11	40		0.00027968	0.990436		25	0	100		-		1	1	0.988764
OTU_96	45	Root	Bacteria	Firmicutes		Clostridia		Clostridiales						0.84	Gracilibacter_thermotolerans_(T)_JW/YJL-S1_(DQ117465)	90.5	1	18	0	0	0	14	13		0.000246777	0.990683		100	31	97		276		1	1	0.988889
OTU_87	45	Root	Bacteria	Proteobacteria		Alphaproteobacteria		Sphingomonadales		Sphingomonadaceae		Sphingomonas		1	Sphingomonas_ginsenosidimutans_(T)_Gsoil_1429_(HM204925)	100	1	0	0	0	0	0	45		0.000246777	0.99093		100	0	100		-		1	1	0.989011
OTU_100	44	Root	Bacteria	Bacteroidetes		Bacteroidia		Bacteroidales		Porphyromonadaceae		Proteiniphilum		0.88	Proteiniphilum_acetatigenes_(T)_TB107_(AY742226)	98	1	27	6	4	0	7	0		0.000241293	0.991171		100	0	0		2600		1	1	0.98913
OTU_93	42	Root	Bacteria	Actinobacteria		Actinobacteria	Coriobacteridae	Coriobacteriales	Coriobacterineae	Coriobacteriaceae				0.5	Olegusella_massiliensis_strain_KHD7_(NR_146815.1)	89.7	1	0	0	20	21	1	0		0.000230325	0.991401		10	100	25		3418		1	1	0.989247
OTU_86	41	Root	Bacteria	Firmicutes		Clostridia		Natranaerobiales		Natranaerobiaceae		Dethiobacter		0.58	Dethiobacter_alkaliphilus_(T)_AHT_1_(EF422412)	89.7	1	15	0	14	0	12	0		0.000224841	0.991626		4	4	22		3869		0	0	0.989247
OTU_98	41	Root	Bacteria	Firmicutes		Clostridia		Clostridiales		Ruminococcaceae		Clostridium III		0.54	Clostridium_hungatei_(T)_AD;_ATCC_700212_(AF020429)	94.9	2	32	9	0	0	0	0		0.000224841	0.991851		100	7	29		1132		1	1	0.989362
OTU_84	38	Root	Bacteria	Firmicutes		Clostridia		Clostridiales		Clostridiaceae 1		Clostridium sensu stricto		1	Clostridium_thermopalmarium_(T)_(X72869)	98	1	0	0	0	0	17	21		0.000208389	0.992059		25	0	100		17		1	1	0.989474
OTU_102	37	Root	Bacteria	Proteobacteria		Deltaproteobacteria		Desulfovibrionales		Desulfomicrobiaceae		Desulfomicrobium		1	Desulfomicrobium_salsuginis_strain_ADR21_(NR_132593.1)	98.8	2	25	8	0	0	4	0		0.000202905	0.992262		100	0	1		-		1	1	0.989583
OTU_94	35	Root	Bacteria	Bacteroidetes		Bacteroidia		Bacteroidales		Porphyromonadaceae		Petrimonas		0.95	Lascolabacillus_massiliensis_strain_SIT8_(NR_144720.1)	97.2	1	29	0	2	0	4	0		0.000191938	0.992454		75	0	0		1018		0	0	0.989583
OTU_91	35	Root	Bacteria	Bacteroidetes										0.99	Pedobacter_sp._MIC2002_(JX978785)	87	1	13	0	18	0	4	0		0.000191938	0.992646		4	39	21		4137		0	0	0.989583
OTU_95	33	Root	Bacteria	Firmicutes		Clostridia		Clostridiales		Eubacteriaceae		Alkalibacter		1	Alkalibacter_saccharofermentans_(T)_Z-79820_(AY312403)	100	1	18	0	9	0	6	0		0.00018097	0.992827		29	9	13		2300		0	0	0.989583
OTU_92	33	Root	Bacteria	Proteobacteria		Alphaproteobacteria		Rhizobiales						0.63	Pedomicrobium_manganicum_(T)_ATCC_33121_(GU269549)	92.1	3	20	11	1	0	1	0		0.00018097	0.993008		100	0	0		137		1	1	0.989691
OTU_90	33	Root	Bacteria	Firmicutes		Clostridia		Clostridiales		Ruminococcaceae				0.5	Thermincola_carboxydiphila_(T)_2204_(AY603000)	89.3	1	9	0	10	0	14	0		0.00018097	0.993189		39	15	16		5160		0	0	0.989691
OTU_110	31	Root	Bacteria	Bacteroidetes										0.99	Alkalitalea_saponilacus_(T)_SC/BZ-SP2_(HQ191474)	88.9	2	30	0	1	0	0	0		0.000170002	0.993359		97	0	0		31		0	1	0.979592
OTU_88	28	Root	Bacteria	Firmicutes		Clostridia		Clostridiales		Syntrophomonadaceae		Syntrophomonas		0.94	Syntrophomonas_zehnderi_(T)_OL-4_(DQ898277)	94.5	1	0	0	2	0	2	24		0.00015355	0.993513		12	0	100		1108		1	1	0.979798
OTU_105	27	Root	Bacteria	Firmicutes										0.96	Bacillaceae_bacterium_13CC_(JN571119)	90.9	1	10	0	10	0	7	0		0.000148066	0.993661		26	12	30		3140		0	0	0.979798
OTU_121	27	Root	Bacteria	Proteobacteria		Gammaproteobacteria		Pseudomonadales		Pseudomonadaceae		Pseudomonas		0.88	Pseudomonas_aestusnigri_CCUG_64165;_VGXO14_(HG004394)	98.4	1	18	0	4	0	5	0		0.000148066	0.993809		16	0	22		4692		0	0	0.979798
OTU_104	25	Root	Bacteria	Firmicutes		Clostridia		Clostridiales				Vallitalea		0.66	Vallitalea_pronyensis_FatNI3_(KC876639)	96	1	1	0	0	0	17	7		0.000137098	0.993946		26	22	100		23		1	1	0.98
OTU_106	25	Root	Bacteria	Bacteroidetes										0.98	Lutaonella_thermophila_(T)_CC-MHSW-2_(EU287913)	86.6	1	15	0	5	0	5	0		0.000137098	0.994083		35	1	3		1251		0	0	0.98
OTU_132	25	Root	Bacteria	Actinobacteria		Actinobacteria								0.51	Olegusella_massiliensis_strain_KHD7_(NR_146815.1)	90.1	1	18	0	2	0	5	0		0.000137098	0.99422		50	13	0		3418		0	0	0.98
OTU_89	25	Root	Archaea	Euryarchaeota		Methanomicrobia		Methanomicrobiales		Methanoregulaceae		Methanolinea		0.91	Methanolinea_mesophila_TNR_(AB447467)	96.5	1	0	0	0	0	6	19		0.000137098	0.994357		5	0	100		6		1	1	0.980198
OTU_119	25	Root	Bacteria	Firmicutes		Clostridia		Clostridiales						0.97	Clostridium_acetireducens_(T)_30A_(X79862)	93.7	2	25	0	0	0	0	0		0.000137098	0.994494		100	15	27		25		0	1	0.970588
OTU_146	24	Root	Bacteria	Firmicutes										0.55	Anaerobacterium_chartisolvens_T-1-35_(AB793710)	86.6	3	11	0	9	0	4	0		0.000131614	0.994626		66	0	0		1254		0	0	0.970588
OTU_101	24	Root	Archaea	Euryarchaeota		Methanobacteria		Methanobacteriales						0.53	Methanobrevibacter_boviskoreani_JH1_(KC608769)	85.8	1	23	0	1	0	0	0		0.000131614	0.994757		100	0	0		24		0	1	0.961165
OTU_107	24	Root	Bacteria	Chloroflexi		Anaerolineae		Anaerolineales		Anaerolineaceae		Ornatilinea		0.59	Ornatilinea_apprima_P3M-1_(JQ292916)	93.7	1	0	0	2	0	8	14		0.000131614	0.994889		8	22	97		799		1	1	0.961538
OTU_113	23	Root	Bacteria	Proteobacteria		Gammaproteobacteria		Chromatiales						0.56	Spiribacter_salinus_M19-40_(CP005963)	92.9	2	14	0	5	0	4	0		0.00012613	0.995015		0	0	0		5401		0	0	0.961538
OTU_103	23	Root	Bacteria	Firmicutes		Clostridia		Clostridiales						0.85	Pelotomaculum_thermopropionicum_(T)_SI_(AB035723)	88.5	1	0	0	0	0	16	7		0.00012613	0.995141		18	19	100		16		1	1	0.961905
OTU_108	22	Root	Bacteria	Firmicutes										0.72	Gelria_glutamica_(T)_TGO_(AF321086)	87.4	1	8	0	4	0	10	0		0.000120646	0.995262		97	15	84		905		0	1	0.95283
OTU_126	21	Root	Bacteria	Firmicutes		Clostridia		Clostridiales		Syntrophomonadaceae		Syntrophomonas		0.63	Pelospora_glutarica_(T)_WoGl3_(AJ251214)	96	1	6	0	1	0	11	3		0.000115163	0.995377		8	0	100		1842		1	1	0.953271
OTU_118	21	Root	Bacteria	Firmicutes		Clostridia		Clostridiales		Syntrophomonadaceae		Syntrophomonas		0.98	Syntrophomonas_zehnderi_(T)_OL-4_(DQ898277)	95.3	1	11	0	9	0	1	0		0.000115163	0.995492		100	25	10		1108		0	1	0.944444
OTU_112	20	Root	Bacteria	Firmicutes		Bacilli		Lactobacillales		Lactobacillaceae		Lactobacillus		1	Lactobacillus_gasseri_(T)_ATCC_33323_(AF519171)	100	4	0	0	13	0	7	0		0.000109679	0.995602		0	0	0		13		0	0	0.944444
OTU_97	20	Root	Bacteria	Spirochaetes		Spirochaetia		Spirochaetales		Spirochaetaceae		Sphaerochaeta		1	Sphaerochaeta_globus_str._Buddy_(AF357916)	98.8	1	0	20	0	0	0	0		0.000109679	0.995712		100	0	0		-		1	1	0.944954
OTU_120	19	Root	Bacteria	Actinobacteria		Actinobacteria	Rubrobacteridae							0.56	Streptomyces_aomiensis_(T)_M24DS04_(AB522686)	89.3	3	11	0	0	0	8	0		0.000104195	0.995816		100	0	0		18		0	1	0.936364
OTU_109	19	Root	Bacteria	Firmicutes		Clostridia		Clostridiales		Peptococcaceae 1		Desulfitibacter		0.79	Desulfitibacter_alkalitolerans_(T)_sk.kt5_(AY538171)	92.9	1	0	0	1	0	12	6		0.000104195	0.99592		11	0	100		520		1	1	0.936937
OTU_117	18	Root	Bacteria	Bacteroidetes		Bacteroidia		Bacteroidales		Prolixibacteraceae				0.67	Mariniphaga_sediminis_strain_SY21_(NR_137221.1)	91.3	1	16	0	1	0	1	0		9.87107e-05	0.996019		77	4	32		164		0	0	0.936937
OTU_208	18	Root	Bacteria	Actinobacteria		Actinobacteria								0.5	Olegusella_massiliensis_strain_KHD7_(NR_146815.1)	88.9	1	11	0	4	0	3	0		9.87107e-05	0.996117		96	33	23		3418		0	1	0.928571
OTU_145	17	Root	Bacteria	Bacteroidetes										0.99	Cytophaga_xylanolytica_strain_DSM_6779_(NR_117112.1)	86.2	2	5	0	6	0	6	0		9.32268e-05	0.996211		21	0	4		2087		0	0	0.928571
OTU_134	16	Root	Bacteria	Proteobacteria		Alphaproteobacteria		Rhizobiales		Rhodobiaceae		Parvibaculum		1	Parvibaculum_lavamentivorans_(T)_DS-1_(AY387398)	100	1	5	0	7	0	4	0		8.77429e-05	0.996298		3	0	3		3448		0	0	0.928571
OTU_123	16	Root	Bacteria	Firmicutes		Clostridia		Clostridiales						1	Natranaerovirga_pectinivora_(T)_AP3_(GQ922846)	94.9	1	5	0	6	0	5	0		8.77429e-05	0.996386		52	22	42		932		0	0	0.928571
OTU_130	15	Root	Bacteria	Ignavibacteriae		Ignavibacteria		Ignavibacteriales		Ignavibacteriaceae		Melioribacter		0.81	Melioribacter_roseus_P3M-2_(JQ292917)	95.7	1	6	0	5	0	4	0		8.22589e-05	0.996468		12	0	0		1015		0	0	0.928571
OTU_144	15	Root	Bacteria	Bacteroidetes										1	Sunxiuqinia_faeciviva_(T)_JAM-BA0302_(AB362263)	85.8	1	5	0	6	0	4	0		8.22589e-05	0.996551		0	0	0		1118		0	0	0.928571
OTU_155	14	Root	Bacteria	Tenericutes		Mollicutes		Acholeplasmatales		Acholeplasmataceae		Acholeplasma		0.99	Acholeplasma_parvum_(T)_H23M_(AY538170)	94.8	1	6	0	3	0	5	0		7.6775e-05	0.996627		0	0	0		2033		0	0	0.928571
OTU_115	14	Root	Bacteria	Verrucomicrobia		Verrucomicrobiae		Verrucomicrobiales		Verrucomicrobiaceae		Akkermansia		1	Akkermansia_muciniphila_(T)_Muc_(AY271254)	100	1	14	0	0	0	0	0		7.6775e-05	0.996704		0	1	3		17		0	0	0.928571
OTU_111	14	Root	Bacteria	Bacteroidetes		Bacteroidia		Bacteroidales		Porphyromonadaceae				0.97	Muribaculum_intestinale_strain_YL27_(NR_144616.1)	93.7	1	5	0	6	0	3	0		7.6775e-05	0.996781		2	0	0		6		0	0	0.928571
OTU_131	13	Root	Bacteria	Firmicutes		Clostridia		Clostridiales		Gracilibacteraceae				0.5	Gracilibacter_thermotolerans_(T)_JW/YJL-S1_(DQ117465)	90.1	1	1	0	3	0	9	0		7.12911e-05	0.996852		44	43	100		276		0	1	0.920354
OTU_140	13	Root	Bacteria	Firmicutes		Clostridia		Clostridiales		Ruminococcaceae		Clostridium III		0.72	[Clostridium]_caenicola_strain_EBR596_(NR_126170.1)	94.9	1	1	0	0	0	11	1		7.12911e-05	0.996924		9	8	15		469		0	0	0.920354
OTU_149	13	Root	Bacteria	Synergistetes		Synergistia		Synergistales		Synergistaceae		Thermovirga		0.88	Thermovirga_lienii_(T)_Cas60314_(DQ071273)	91.7	1	1	0	7	0	5	0		7.12911e-05	0.996995		5	21	91		774		0	1	0.912281
OTU_171	12	Root	Archaea	Euryarchaeota		Methanobacteria		Methanobacteriales		Methanobacteriaceae		Methanobacterium		1	Methanobacterium_oryzae_(T)_FPi_(AF028690)	99.6	1	2	0	8	0	2	0		6.58072e-05	0.997061		0	0	32		-		0	0	0.912281
OTU_114	12	Root	Bacteria	Firmicutes										0.84	Vallitalea_pronyensis_FatNI3_(KC876639)	88.5	1	0	0	0	0	0	12		6.58072e-05	0.997126		0	0	0		23		0	0	0.912281
OTU_124	12	Root	Bacteria	Firmicutes		Bacilli		Lactobacillales		Lactobacillaceae		Lactobacillus		0.97	Lactobacillus_faecis_AFL13-2_(AB812750)	100	4	0	0	7	0	5	0		6.58072e-05	0.997192		0	16	100		30		0	1	0.904348
OTU_127	12	Root	Bacteria	Firmicutes		Bacilli		Bacillales		Bacillales_incertae_sedis		Desulfuribacillus		1	Desulfuribacillus_alkaliarsenatis_AHT28_(HM046584)	99.2	1	1	0	1	0	10	0		6.58072e-05	0.997258		85	5	10		22		0	0	0.904348
OTU_139	12	Root	Bacteria	Proteobacteria		Alphaproteobacteria		Rhodobacterales		Rhodobacteraceae				1	Paracoccus_aestuarii_(T)_B7_(EF660757)	99.2	7	5	0	4	0	3	0		6.58072e-05	0.997324		22	49	97		1524		0	1	0.896552
OTU_116	12	Root	Bacteria	Bacteroidetes		Bacteroidia		Bacteroidales		Porphyromonadaceae				0.85	Muribaculum_intestinale_strain_YL27_(NR_144616.1)	89.7	1	5	0	4	0	3	0		6.58072e-05	0.99739		0	0	0		6		0	0	0.896552
OTU_125	11	Root	Bacteria											1	Desulfosporosinus_orientis_(T)_DSM_765_(Y11570)	89.7	3	0	0	0	0	11	0		6.03232e-05	0.99745		16	8	100		16		0	1	0.888889
OTU_142	11	Root	Bacteria	Proteobacteria		Deltaproteobacteria		Syntrophobacterales		Syntrophaceae				0.97	Smithella_propionica_(T)_LYP_(AF126282)	94.5	1	9	0	1	0	1	0		6.03232e-05	0.99751		99	13	100		577		0	1	0.881356
OTU_122	11	Root	Bacteria	Bacteroidetes		Bacteroidia		Bacteroidales		Porphyromonadaceae		Odoribacter		0.99	Culturomica_massiliensis_strain_Marseille-P2698_(NR_144745.1)	93.3	1	0	0	9	0	2	0		6.03232e-05	0.997571		2	10	94		9		0	1	0.87395
OTU_128	10	Root	Bacteria	Bacteroidetes		Bacteroidia		Bacteroidales						0.72	Porphyromonas_pogonae_strain_MI_10-1288_(NR_136443.1)	86.2	1	5	0	0	0	5	0		5.48393e-05	0.997625		48	1	2		6717		0	0	0.87395
OTU_133	10	Root	Bacteria	Chloroflexi		Anaerolineae		Anaerolineales		Anaerolineaceae				0.65	Bellilinea_caldifistulae_(T)_GOMI-1_(AB243672)	87.7	1	0	0	4	0	6	0		5.48393e-05	0.99768		0	0	0		81		0	0	0.87395
OTU_148	10	Root	Bacteria	Tenericutes		Mollicutes		Acholeplasmatales		Acholeplasmataceae		Acholeplasma		0.9	Acholeplasma_parvum_(T)_H23M_(AY538170)	92.9	1	1	0	2	0	7	0		5.48393e-05	0.997735		0	87	67		2033		0	0	0.87395
OTU_211	10	Root	Bacteria	Bacteroidetes										0.98	Natronoflexus_pectinivorans_AP1_(GQ922844)	88.1	2	3	0	2	0	5	0		5.48393e-05	0.99779		0	0	7		1534		0	0	0.87395
OTU_135	10	Root	Bacteria	Firmicutes		Clostridia		Clostridiales		Clostridiales_Incertae Sedis XI		Tissierella		0.61	Soehngenia_saccharolytica_(T)_BOR-Y_(AY353956)	96.8	1	4	0	2	0	4	0		5.48393e-05	0.997845		3	8	100		767		0	1	0.866667
OTU_186	10	Root	Bacteria	Firmicutes		Clostridia								0.61	Caloramator_fervidus_(T)_RT4._B1_(L09187)	89.7	1	0	0	9	0	1	0		5.48393e-05	0.9979		15	1	78		60		0	0	0.866667
OTU_184	10	Root	Bacteria	Firmicutes		Clostridia		Clostridiales						0.55	Desulfitobacterium_hafniense_(T)_DCB-2_(CP001336)	88.5	6	3	0	0	0	7	0		5.48393e-05	0.997954		57	0	0		29		0	0	0.866667
OTU_154	9	Root	Bacteria	Deferribacteres		Deferribacteres		Deferribacterales		Deferribacteraceae		Geovibrio		1	Geovibrio_ferrireducens_(T)_PAL-1_(X95744)	99.2	1	3	0	5	0	1	0		4.93554e-05	0.998004		40	100	40		562		0	1	0.859504
OTU_143	9	Root	Bacteria	Spirochaetes		Spirochaetia		Spirochaetales		Spirochaetaceae		Treponema		1	Treponema_caldarium_(T)_DSMZ7334_(EU580141)	96	1	8	0	0	0	1	0		4.93554e-05	0.998053		100	0	0		34		0	1	0.852459
OTU_147	9	Root	Bacteria	Firmicutes		Clostridia		Clostridiales		Clostridiaceae 2		Anoxynatronum		0.58	Anoxynatronum_sibiricum_(T)_Z-7981_(AF522323)	99.2	1	7	0	1	0	1	0		4.93554e-05	0.998103		76	1	3		188		0	0	0.852459
OTU_157	9	Root	Bacteria											1	Thermanaerovibrio_acidaminovorans_strain_DSM_6589_(NR_114455.1)	87	1	0	0	9	0	0	0		4.93554e-05	0.998152		15	33	100		9		0	1	0.845528
OTU_152	9	Root	Bacteria	Firmicutes		Clostridia		Thermoanaerobacterales		Thermoanaerobacteraceae		Moorella		0.98	Moorella_glycerini_(T)_YS6_(U82327)	95.7	3	0	0	3	0	6	0		4.93554e-05	0.998201		11	74	44		6		0	0	0.845528
OTU_177	9	Root	Bacteria	Bacteroidetes		Bacteroidia		Bacteroidales		Porphyromonadaceae				0.87	Muribaculum_intestinale_strain_YL27_(NR_144616.1)	91.3	1	2	0	2	0	5	0		4.93554e-05	0.998251		3	9	34		6		0	0	0.845528
OTU_136	9	Root	Bacteria	Firmicutes		Clostridia		Clostridiales						0.84	Gracilibacter_thermotolerans_(T)_JW/YJL-S1_(DQ117465)	91.7	1	0	0	0	0	0	9		4.93554e-05	0.9983		75	0	0		276		0	0	0.845528
OTU_172	9	Root	Bacteria	Bacteroidetes		Flavobacteriia		Flavobacteriales						0.5	Cytophaga_fermentans_(T)_ATCC_19072_(M58766)	88.9	1	0	0	5	0	4	0		4.93554e-05	0.998349		0	12	20		5880		0	0	0.845528
OTU_178	9	Root	Bacteria	Proteobacteria		Deltaproteobacteria		Desulfovibrionales		Desulfovibrionaceae		Desulfovibrio		1	Desulfovibrio_psychrotolerans_(T)_type_strain:_PWC_=_JS1_(AM418397)	99.2	1	7	0	1	0	1	0		4.93554e-05	0.998399		72	73	100		274		0	1	0.83871
OTU_164	9	Root	Bacteria											1	*	0	1	3	0	4	0	2	0		4.93554e-05	0.998448		0	0	0		-		0	0	0.83871
OTU_137	8	Root	Bacteria	Firmicutes		Clostridia		Clostridiales						0.99	Christensenella_minuta_YIT_12065_(AB490809)	93.3	1	8	0	0	0	0	0		4.38714e-05	0.998492		20	0	6		39		0	0	0.83871
OTU_150	8	Root	Bacteria	Bacteroidetes		Bacteroidia		Bacteroidales		Porphyromonadaceae		Petrimonas		0.88	Petrimonas_sulfuriphila_(T)_BN3_(AY570690)	95.3	1	7	0	0	0	1	0		4.38714e-05	0.998536		78	1	0		465		0	0	0.83871
OTU_129	8	Root	Bacteria	Firmicutes										0.59	*	0	1	3	0	3	0	2	0		4.38714e-05	0.99858		11	0	0		-		0	0	0.83871
OTU_163	8	Root	Bacteria	Bacteroidetes		Bacteroidia		Bacteroidales		Porphyromonadaceae				0.97	Muribaculum_intestinale_strain_YL27_(NR_144616.1)	93.7	1	2	0	3	0	3	0		4.38714e-05	0.998624		0	9	23		6		0	0	0.83871
OTU_156	7	Root	Bacteria											0.99	Aminobacterium_colombiense_strain_DSM_12261_(NR_074624.1)	85.8	2	4	0	2	0	1	0		3.83875e-05	0.998662		0	0	0		369		0	0	0.83871
OTU_224	7	Root	Bacteria	Chloroflexi		Anaerolineae		Anaerolineales		Anaerolineaceae		Ornatilinea		0.95	Ornatilinea_apprima_P3M-1_(JQ292916)	89.3	1	3	0	3	0	1	0		3.83875e-05	0.9987		48	23	91		799		0	1	0.832
OTU_223	7	Root	Bacteria	Firmicutes		Clostridia		Clostridiales		Clostridiaceae 2		Alkaliphilus		0.87	Alkaliphilus_peptidifermentans_(T)_Z-7036_(EF382660)	98.8	1	4	0	1	0	2	0		3.83875e-05	0.998739		38	29	100		259		0	1	0.825397
OTU_141	7	Root	Bacteria	Chloroflexi		Anaerolineae		Anaerolineales		Anaerolineaceae		Ornatilinea		0.58	anaerobic_bacterium_MO-CFX1_(AB598277)	91.7	1	0	0	0	0	7	0		3.83875e-05	0.998777		8	8	47		58		0	0	0.825397
OTU_153	7	Root	Bacteria	Proteobacteria										0.53	*	0	1	1	0	5	0	1	0		3.83875e-05	0.998815		0	7	100		-		0	1	0.818898
OTU_175	7	Root	Bacteria	Proteobacteria		Deltaproteobacteria		Syntrophobacterales		Syntrophaceae		Smithella		0.93	Smithella_propionica_(T)_LYP_(AF126282)	92.9	1	2	0	1	0	4	0		3.83875e-05	0.998854		3	0	0		577		0	0	0.818898
OTU_138	7	Root	Archaea	Euryarchaeota		Methanobacteria		Methanobacteriales		Methanobacteriaceae		Methanobacterium		0.98	Methanobacterium_subterraneum_(T)_A8p,_DSM_11074_(X99044)	96.9	1	0	0	0	0	0	7		3.83875e-05	0.998892		0	0	50		7783		0	0	0.818898
OTU_174	7	Root	Bacteria	Firmicutes		Clostridia		Clostridiales		Ruminococcaceae		Acetanaerobacterium		0.64	Acetanaerobacterium_elongatum_(T)_Z7_(AY487928)	91.7	1	2	0	1	0	4	0		3.83875e-05	0.998931		68	7	0		24		0	0	0.818898
OTU_203	7	Root	Bacteria	Firmicutes		Clostridia		Natranaerobiales		Natranaerobiaceae		Dethiobacter		0.96	Dethiobacter_alkaliphilus_(T)_AHT_1_(EF422412)	96	1	0	0	3	0	4	0		3.83875e-05	0.998969		5	6	6		3869		0	0	0.818898
OTU_151	7	Root	Bacteria	Bacteroidetes		Bacteroidia		Bacteroidales		Porphyromonadaceae		Coprobacter		0.51	Muribaculum_intestinale_strain_YL27_(NR_144616.1)	94.8	1	0	0	5	0	2	0		3.83875e-05	0.999007		2	1	3		6		0	0	0.818898
OTU_170	6	Root	Bacteria	Proteobacteria		Deltaproteobacteria		Desulfuromonadales		Desulfuromonadaceae		Desulfuromonas		0.95	Desulfuromonas_thiophila_(T)_NZ27_(DSMZ_8987)_(Y11560)	96.4	2	5	0	1	0	0	0		3.29036e-05	0.99904		28	4	4		30		0	0	0.818898
OTU_162	6	Root	Bacteria	Chloroflexi		Anaerolineae		Anaerolineales		Anaerolineaceae				0.95	Thermanaerothrix_daxensis_strain_GNS-1_(NR_117865.1)	85.4	1	2	0	4	0	0	0		3.29036e-05	0.999073		62	41	44		54		0	0	0.818898
OTU_180	6	Root	Bacteria	Firmicutes		Clostridia		Clostridiales		Clostridiales_Incertae Sedis XI		Sedimentibacter		1	Sedimentibacter_saalensis_(T)_ZF2_(AJ404680)	99.6	1	1	0	3	0	2	0		3.29036e-05	0.999106		25	9	17		473		0	0	0.818898
OTU_216	6	Root	Bacteria	Thermotogae		Thermotogae		Kosmotogales		Kosmotogaceae		Mesotoga		1	Thermotogales_bacterium_MesG1Ag4.2.16S.B_(HM003109)	98.4	1	3	0	3	0	0	0		3.29036e-05	0.999139		0	0	0		875		0	0	0.818898
OTU_161	6	Root	Bacteria	Firmicutes										0.51	Calditerricola_yamamurae_(T)_YMO722_(AB308475)	86.6	2	3	0	1	0	2	0		3.29036e-05	0.999172		0	0	1		484		0	0	0.818898
OTU_168	6	Root	Bacteria	Proteobacteria		Gammaproteobacteria		Enterobacteriales		Enterobacteriaceae		Citrobacter		0.59	Citrobacter_sedlakii_(T)_CDC_4696-86_(AF025364)	100	4	4	0	1	0	1	0		3.29036e-05	0.999205		85	22	44		93		0	0	0.818898
OTU_158	6	Root	Bacteria	Firmicutes		Clostridia		Thermoanaerobacterales		Thermoanaerobacteraceae				0.8	Thermoanaerobacter_thermocopriae_(T)_JT-3T_(L09167)	91.7	3	6	0	0	0	0	0		3.29036e-05	0.999238		28	0	0		624		0	0	0.818898
OTU_194	6	Root	Bacteria	Proteobacteria		Deltaproteobacteria		Syntrophobacterales		Syntrophaceae		Smithella		0.64	Smithella_propionica_(T)_LYP_(AF126282)	97.2	1	5	0	1	0	0	0		3.29036e-05	0.999271		45	0	11		577		0	0	0.818898
OTU_159	6	Root	Bacteria	Firmicutes		Clostridia		Clostridiales		Clostridiaceae 2		Alkaliphilus		1	Alkaliphilus_crotonatoxidans_(T)_B11-2_(AF467248)	100	2	5	0	1	0	0	0		3.29036e-05	0.999304		30	83	2		505		0	0	0.818898
OTU_191	5	Root	Bacteria	Firmicutes		Clostridia		Clostridiales						0.69	Moorella_humiferrea_(T)_64_FGQ_(GQ872425)	92.9	1	4	0	0	0	1	0		2.74196e-05	0.999331		44	9	44		128		0	0	0.818898
OTU_198	5	Root	Archaea	Euryarchaeota		Methanomicrobia		Methanomicrobiales		Methanomicrobiaceae		Methanofollis		1	Methanofollis_tationis_(T)_DSM_2702_(AF095272)	99.6	2	3	0	1	0	1	0		2.74196e-05	0.999358		0	1	22		316		0	0	0.818898
OTU_187	5	Root	Bacteria											1	Streptomyces_cinereorectus_(T)_NBRC_15395_(AB184646)	86.6	12	0	0	5	0	0	0		2.74196e-05	0.999386		0	100	40		5		0	1	0.8125
OTU_200	5	Root	Bacteria	Chloroflexi		Anaerolineae		Anaerolineales		Anaerolineaceae				1	Levilinea_saccharolytica_(T)_KIBI-1_(AB109439)	95.3	1	0	0	4	0	1	0		2.74196e-05	0.999413		12	98	9		7		0	1	0.806202
OTU_167	5	Root	Bacteria	Firmicutes		Clostridia		Clostridiales		Clostridiales_Incertae Sedis XIV		Anaerobranca		1	Anaerobranca_zavarzinii_(T)_JW/VK-KS5Y_(EF190921)	100	1	1	0	3	0	1	0		2.74196e-05	0.999441		16	0	0		289		0	0	0.806202
OTU_169	5	Root	Bacteria	Firmicutes		Clostridia		Clostridiales						0.99	Defluviitalea_saccharophila_(T)_LIND6LT2_(HQ020487)	92.9	1	1	0	0	0	4	0		2.74196e-05	0.999468		42	0	0		-		0	0	0.806202
OTU_182	5	Root	Bacteria	Bacteroidetes		Bacteroidia		Bacteroidales		Porphyromonadaceae				0.84	Muribaculum_intestinale_strain_YL27_(NR_144616.1)	89.3	1	2	0	1	0	2	0		2.74196e-05	0.999495		0	4	69		6		0	0	0.806202
OTU_217	4	Root	Bacteria	Firmicutes		Clostridia		Clostridiales						0.55	Lutispora_thermophila_(T)_EBR46_(AB186360)	89.3	2	3	0	1	0	0	0		2.19357e-05	0.999517		18	17	62		99		0	0	0.806202
OTU_221	4	Root	Bacteria	Bacteroidetes										1	Cytophaga_xylanolytica_strain_DSM_6779_(NR_117112.1)	85.8	1	1	0	2	0	1	0		2.19357e-05	0.999539		13	0	0		2087		0	0	0.806202
OTU_219	4	Root	Bacteria											1	uncultured_candidate_division_BRC1_bacterium_LD1-PA21_(AY114315)	89.3	1	4	0	0	0	0	0		2.19357e-05	0.999561		64	7	2		114		0	0	0.806202
OTU_160	4	Root	Bacteria	Proteobacteria		Alphaproteobacteria		Rhizobiales		Phyllobacteriaceae				0.93	Mesorhizobium_camelthorni_(T)_CCNWXJ40-4_(EU169581)	99.6	1	2	0	2	0	0	0		2.19357e-05	0.999583		23	19	47		1137		0	0	0.806202
OTU_185	4	Root	Bacteria	Bacteroidetes		Bacteroidia		Bacteroidales		Porphyromonadaceae		Coprobacter		0.5	Muribaculum_intestinale_strain_YL27_(NR_144616.1)	90.5	1	0	0	1	0	3	0		2.19357e-05	0.999605		2	12	19		6		0	0	0.806202
OTU_193	4	Root	Bacteria	Firmicutes		Clostridia		Clostridiales						0.69	Gelria_glutamica_(T)_TGO_(AF321086)	89.7	1	0	0	4	0	0	0		2.19357e-05	0.999627		18	2	2		905		0	0	0.806202
OTU_173	4	Root	Bacteria	Proteobacteria		Deltaproteobacteria		Syntrophobacterales		Syntrophaceae		Smithella		0.7	Smithella_propionica_(T)_LYP_(AF126282)	93.3	1	2	0	2	0	0	0		2.19357e-05	0.999649		0	0	0		577		0	0	0.806202
OTU_176	4	Root	Bacteria	Proteobacteria		Alphaproteobacteria		Rhizobiales		Methylocystaceae		Pleomorphomonas		0.99	Pleomorphomonas_diazotrophica_R5-392_(JQ346801)	100	2	1	0	3	0	0	0		2.19357e-05	0.999671		16	0	28		748		0	0	0.806202
OTU_181	4	Root	Bacteria	Firmicutes		Clostridia		Clostridiales						0.8	Desulfotomaculum_acetoxidans_(T)_DSM_771_(Y11566)	90.9	1	1	0	2	0	1	0		2.19357e-05	0.999693		15	15	100		2474		0	1	0.8
OTU_179	4	Root	Bacteria	Firmicutes		Clostridia		Clostridiales		Ruminococcaceae		Clostridium III		0.9	Pseudobacteroides_cellulosolvens_(L35517)	95.7	3	0	0	0	0	4	0		2.19357e-05	0.999715		47	0	17		4		0	0	0.8
OTU_183	3	Root	Bacteria	Bacteroidetes		Bacteroidia		Bacteroidales		Porphyromonadaceae				0.97	Muribaculum_intestinale_strain_YL27_(NR_144616.1)	91.7	1	2	0	0	0	1	0		1.64518e-05	0.999731		2	83	18		6		0	0	0.8
OTU_202	3	Root	Bacteria	Bacteroidetes		Bacteroidia		Bacteroidales		Porphyromonadaceae				0.97	Muribaculum_intestinale_strain_YL27_(NR_144616.1)	93.7	1	0	0	1	0	2	0		1.64518e-05	0.999748		2	8	26		6		0	0	0.8
OTU_188	3	Root	Bacteria	Firmicutes		Clostridia		Clostridiales						0.65	Gracilibacter_thermotolerans_(T)_JW/YJL-S1_(DQ117465)	90.5	1	0	0	2	0	1	0		1.64518e-05	0.999764		14	0	0		276		0	0	0.8
OTU_192	3	Root	Bacteria	Chloroflexi		Anaerolineae		Anaerolineales		Anaerolineaceae				0.8	*	0	1	3	0	0	0	0	0		1.64518e-05	0.999781		85	0	0		-		0	0	0.8
OTU_207	3	Root	Bacteria	Proteobacteria		Betaproteobacteria		Procabacteriales		Procabacteriaceae		Candidatus Procabacter		1	Candidatus_Procabacter_acanthamoebae_(AF177427)	99.2	1	2	0	1	0	0	0		1.64518e-05	0.999797		0	0	0		449		0	0	0.8
OTU_197	3	Root	Bacteria	Bacteroidetes		Bacteroidia		Bacteroidales		Porphyromonadaceae				0.98	Muribaculum_intestinale_strain_YL27_(NR_144616.1)	96.4	1	1	0	0	0	2	0		1.64518e-05	0.999814		0	0	0		6		0	0	0.8
OTU_213	3	Root	Bacteria	Acidobacteria		Acidobacteria_Gp23						Gp23		0.65	uncultured_bacterium_FW34_(AF523981)	96	1	3	0	0	0	0	0		1.64518e-05	0.99983		45	13	81		7		0	0	0.8
OTU_218	3	Root	Bacteria	Acidobacteria		Acidobacteria_Gp23						Thermoanaerobaculum		0.56	uncultured_bacterium_FW34_(AF523981)	94.5	1	3	0	0	0	0	0		1.64518e-05	0.999846		61	1	3		7		0	0	0.8
OTU_212	3	Root	Archaea	Euryarchaeota		Methanomicrobia		Methanomicrobiales		Methanoregulaceae		Methanoregula		1	Methanoregula_formicica_(T)_SMSP_(AB479390)	99.6	1	3	0	0	0	0	0		1.64518e-05	0.999863		96	0	5		3		0	1	0.793893
OTU_210	3	Root	Bacteria	Firmicutes		Clostridia		Clostridiales		Lachnospiraceae		Clostridium XlVa		1	Clostridium_saccharolyticum_(T)_DSM_2544_(Y18185)	100	1	0	0	0	0	3	0		1.64518e-05	0.999879		22	7	2		9		0	0	0.793893
OTU_190	2	Root	Bacteria	Proteobacteria		Gammaproteobacteria		Pseudomonadales		Moraxellaceae		Acinetobacter		1	Acinetobacter_indicus_(T)_A648_(HM047743)	100	1	0	0	0	0	2	0		1.09679e-05	0.99989		0	6	11		2		0	0	0.793893
OTU_209	2	Root	Bacteria	Firmicutes		Clostridia		Clostridiales		Peptococcaceae 1				0.94	Dehalobacter_restrictus_(T)_PER-K23_(U84497)	95.6	1	2	0	0	0	0	0		1.09679e-05	0.999901		65	0	16		23		0	0	0.793893
OTU_220	2	Root	Bacteria	Bacteroidetes		Bacteroidia		Bacteroidales		Bacteroidaceae		Bacteroides		1	Bacteroides_acidifaciens_(T)_A40_(AB021164)	100	1	1	0	1	0	0	0		1.09679e-05	0.999912		15	0	14		7		0	0	0.793893
OTU_215	2	Root	Bacteria	Firmicutes		Clostridia		Clostridiales		Ruminococcaceae		Saccharofermentans		0.9	Saccharofermentans_acetigenes_(T)_P6_(AY949857)	95.3	1	2	0	0	0	0	0		1.09679e-05	0.999923		11	0	0		293		0	0	0.793893
OTU_189	2	Root	Bacteria	Chloroflexi		Anaerolineae		Anaerolineales		Anaerolineaceae				1	Ornatilinea_apprima_P3M-1_(JQ292916)	90.9	1	0	0	1	0	1	0		1.09679e-05	0.999934		8	0	0		799		0	0	0.793893
OTU_222	2	Root	Bacteria	Firmicutes		Clostridia		Clostridiales		Ruminococcaceae		Ercella		0.59	Ruminococcaceae_bacterium_ZWB_4_(HG003571)	92.9	1	0	0	1	0	1	0		1.09679e-05	0.999945		14	23	100		245		0	1	0.787879
OTU_201	2	Root	Bacteria	Firmicutes		Clostridia		Clostridiales		Lachnospiraceae				0.98	Clostridium_lavalense_(T)_CCRI-9842_(EF564277)	93.7	2	2	0	0	0	0	0		1.09679e-05	0.999956		21	40	17		2		0	0	0.787879
OTU_195	2	Root	Bacteria	Firmicutes		Clostridia								0.88	Desulfurispora_thermophila_(T)_RA50E1_(AY548776)	90.9	1	0	0	2	0	0	0		1.09679e-05	0.999967		7	30	68		7		0	0	0.787879
OTU_214	2	Root	Bacteria	Cloacimonetes								Candidatus Cloacamonas		0.99	Candidatus_Cloacimonas_acidaminovorans_str._Evry_(CU466930)	91.7	1	2	0	0	0	0	0		1.09679e-05	0.999978		0	12	17		609		0	0	0.787879
OTU_205	2	Root	Bacteria	Proteobacteria		Betaproteobacteria		Burkholderiales		Comamonadaceae		Hydrogenophaga		0.51	Hydrogenophaga_defluvii_(T)_type_strain:_BSB_9.5_(AJ585993)	98.8	3	0	0	0	0	2	0		1.09679e-05	0.999989		0	63	9		2		0	0	0.787879
OTU_206	2	Root	Bacteria	Firmicutes		Clostridia		Thermoanaerobacterales		Thermoanaerobacteraceae				0.51	uncultured_soil_bacterium_PBS-III-27_(AJ390456)	86.2	2	0	0	2	0	0	0		1.09679e-05	1		17	0	11		42		0	0	0.787879

## Sheet: AE sample
OTU	Size	Species	W1 amplicon	W1 extended	W2 amplicon	W2 extended	W3 amplicon	W3 extended
1	43603	Desulfuromonas acetexigens (T) (U23140)	27333	13574	132	0	1554	1010
2	24970	Thermodesulfovibrio aggregans (T) TGE-P1 (AB021302)	24	0	17120	7816	10	0
3	10514	Treponema zuelzerae (T) type strain: DSM 1903; 2 (FR749929)	13	0	1171	305	5956	3069
4	10163	Methanobacterium subterraneum (T) A8p, DSM 11074 (X99044)	5	0	29	0	7736	2393
5	7081	Cytophaga fermentans (T) ATCC 19072 (M58766)	9	0	5845	1220	7	0
7	6514	Methanosaeta harundinacea (T) 8Ac (AY817738)	1032	192	16	0	3332	1942
6	6264	Parabacteroides distasonis (T) JCM 5825 (AB238922)	1270	271	9	0	3116	1598
8	5520	Thermacetogenium phaeum (T) PB (AB020336)	5	0	14	0	3285	2216
10	4837	candidate division OP1 clone OPB14 (AF027045)	3	0	4057	771	6	0
12	4611	Lysinibacillus sp. LAM612 (KF443809)	3	0	7	0	533	4068
9	4258	Methanosarcina siciliae type strain: DSM3028 (FR733698)	1238	2733	11	0	54	222
13	3847	Methanocalculus pumilus (T) MHT-1 (AB008853)	3312	476	30	0	29	0
11	3652	Desulfotomaculum acetoxidans (T) DSM 771 (Y11566)	6	0	2463	1177	6	0
14	3390	Syntrophaceticus schinkii (T) Sp3 (EU386162)	6	0	2871	506	7	0
15	3383	Methanobacterium aarhusense (T) H2-LR (AY386124)	1	0	3104	271	7	0
17	3012	Methanothermobacter thermoflexus (T) IDZ, VKM B-1963, DSM 7268 (X99047)	1	0	2685	326	0	0
16	2920	Sulfurospirillum alkalitolerans HTRB-L1 (GQ863490)	2340	508	41	0	31	0
21	2114	Methanobacterium alcaliphilum (T) NBRC 105226 (AB496639)	2	0	1161	100	586	265
18	2099	Clostridium hungatei (T) AD; ATCC 700212 (AF020429)	5	0	5	0	1124	965
20	2067	Natronincola peptidivorans (T) Z-7031 (EF382661)	12	0	8	0	1293	754
19	1955	Pontibacter sp. JC215 A10 (HG008901)	4	0	2	0	931	1018
23	1734	Porphyromonas pogonae strain MI 10-1288 (NR 136443.1)	1059	128	29	0	389	129
25	1557	Acetobacterium malicum (T) DSM 4132 (X96957)	929	304	16	0	153	155
22	1515	Desulfovibrio oxamicus (T) DSM 1925 (DQ122124)	19	10	2	0	860	624
24	1513	*	2	0	955	556	0	0

[truncated: 19 more sheets: AE-W1, AE-W2, AE-W3, K-A W1, K-A W2, K-A W3, All MECSM samples, Kelpie stats, Identity K-A all, Identity K-A W1, Identity K-A W2, Identity K-A W3, MetaPhlAn, MPA species, MPA genus, AESS genus, W1 genus, W2 genus, W3 genus]
