# Supplementary material for: Kelpie: generating full-length ‘amplicons’ from whole-metagenome datasets
Source: PeerJ. 2019 Jan 30;6:e6174. doi: 10.7717/peerj.6174 (PMC6359901; doi:10.7717/peerj.6174)
Supplement: Table S7 — Source spreadsheet for the CAMI Low-derived tables and figures. [file peerj-07-6174-s007.xlsx]

## Sheet: CAMI profile
@SampleID:
@Version:0.9.1
@Ranks:superkingdom|phylum|class|order|family|genus|species|strain																superkingdom	phylum	class	order	family	genus	species			Order	Family	Genus	Species	Strains
																Bacteria	Actinobacteria	Actinobacteria	Actinomycetales	Intrasporangiaceae	Tetrasphaera	Tetrasphaera duodecadis			3.8774	3.6069	3.6069	3.6069	1
@@TAXID	RANK	TAXPATH	TAXPATHSN									PERCENTAGE				Bacteria	Actinobacteria	Actinobacteria	Actinomycetales	Actinomycetales_f	Actinomycetales_g	Actinomycetales_sp			3.8774	0.2705	0.2705	0.2705	1
10239	superkingdom	10239	Viruses									6.3464				Bacteria	Bacteroidetes	Flavobacteriia	Flavobacteriales	Flavobacteriaceae	Nonlabens	Nonlabens dokdonensis			0.024	0.024	0.024	0.024	1
2	superkingdom	2	Bacteria									28.5714				Bacteria	Bacteroidetes	Sphingobacteriia	Sphingobacteriales	Chitinophagaceae	Flavisolibacter	Flavisolibacter ginsengisoli			5.2233	5.2233	0.428	0.1657	1
976	phylum	2|976	Bacteria	Bacteroidetes								5.2473	28.5714	0.183656		Bacteria	Bacteroidetes	Sphingobacteriia	Sphingobacteriales	Chitinophagaceae	Flavisolibacter	Flavisolibacter ginsengiterrae			5.2233	5.2233	0.428	0.2622	1
1224	phylum	2|1224	Bacteria	Proteobacteria								5.9629		0.208702		Bacteria	Bacteroidetes	Sphingobacteriia	Sphingobacteriales	Chitinophagaceae	Hydrotalea	Hydrotalea sandarakina			5.2233	5.2233	4.7954	4.7954	6
544448	phylum	2|544448	Bacteria	Tenericutes								2.8196		0.0986861		Bacteria	Chloroflexi	Ktedonobacteria	Ktedonobacterales	Thermosporotrichaceae	Thermosporothrix	Thermosporothrix hazakensis			1.3461	1.3461	1.3461	1.3461	1
200795	phylum	2|200795	Bacteria	Chloroflexi								1.3461		0.0471135		Bacteria	Firmicutes	Bacilli	Bacillales	Bacillales_f	Bacillales_g	Bacillales_sp			2.2267	2.2267	2.2267	2.2267	5
1239	phylum	2|1239	Bacteria	Firmicutes								9.3181		0.326134		Bacteria	Firmicutes	Clostridia	Clostridiales	Clostridiaceae	Anaerosporobacter	Anaerosporobacter mobilis			0.2734	0.0711	0.0314	0.0314	1
201174	phylum	2|201174	Bacteria	Actinobacteria								3.8774		0.135709		Bacteria	Firmicutes	Clostridia	Clostridiales	Clostridiaceae	Clostridium	Clostridium caminithermale			0.2734	0.0711	0.0397	0.0397	1
388447	class	2|200795|388447	Bacteria	Chloroflexi	Ktedonobacteria							1.3461	28.5714	0.0471135		Bacteria	Firmicutes	Clostridia	Clostridiales	Peptostreptococcaceae	Tepidibacter	Tepidibacter formicigenes			0.2734	0.1617	0.1617	0.1617	1
1236	class	2|1224|1236	Bacteria	Proteobacteria	Gammaproteobacteria							1.6483		0.0576906		Bacteria	Firmicutes	Clostridia	Clostridiales	Proteinivoraceae	Anaerobranca	Anaerobranca californiensis			0.2734	0.0407	0.0407	0.0407	1
31969	class	2|544448|31969	Bacteria	Tenericutes	Mollicutes							2.8196		0.0986861		Bacteria	Firmicutes	Negativicutes	Selenomonadales	Veillonellaceae	Schwartzia	Schwartzia succinivorans			6.8179	6.8179	6.8179	6.8179	1
909932	class	2|1239|909932	Bacteria	Firmicutes	Negativicutes							6.8179		0.238627		Bacteria	Proteobacteria	Alphaproteobacteria	Rhodobacterales	Rhodobacteraceae	Albidovulum	Albidovulum xiamenense			1.7325	1.7325	0.1069	0.1069	1
186801	class	2|1239|186801	Bacteria	Firmicutes	Clostridia							0.2734		0.00956901		Bacteria	Proteobacteria	Alphaproteobacteria	Rhodobacterales	Rhodobacteraceae	Defluviimonas	Defluviimonas denitrificans			1.7325	1.7325	0.7266	0.7266	1
91061	class	2|1239|91061	Bacteria	Firmicutes	Bacilli							2.2267		0.0779346		Bacteria	Proteobacteria	Alphaproteobacteria	Rhodobacterales	Rhodobacteraceae	Paracoccus	Paracoccus denitrificans			1.7325	1.7325	0.8991	0.8991	3
28221	class	2|1224|28221	Bacteria	Proteobacteria	Deltaproteobacteria							0.4606		0.016121		Bacteria	Proteobacteria	Betaproteobacteria	Burkholderiales	Comamonadaceae	Lampropedia	Lampropedia hyalina			1.9597	0.0855	0.0855	0.0855	1
28216	class	2|1224|28216	Bacteria	Proteobacteria	Betaproteobacteria							2.1216		0.0742561		Bacteria	Proteobacteria	Betaproteobacteria	Burkholderiales	Oxalobacteraceae	Janthinobacterium	Janthinobacterium_sp			1.9597	1.8742	1.8742	1.8742	2
117747	class	2|976|117747	Bacteria	Bacteroidetes	Sphingobacteriia							5.2233		0.182816		Bacteria	Proteobacteria	Betaproteobacteria	Neisseriales	Chromobacteriaceae	Andreprevotia	Andreprevotia lacus			0.1618	0.1618	0.1618	0.1618	1
1760	class	2|201174|1760	Bacteria	Actinobacteria	Actinobacteria							3.8774		0.135709		Bacteria	Proteobacteria	Deltaproteobacteria	Desulfobacterales	Desulfobacteraceae	Desulfatibacillum	Desulfatibacillum alkenivorans			0.4606	0.4606	0.4606	0.4606	1
117743	class	2|976|117743	Bacteria	Bacteroidetes	Flavobacteriia							0.024		0.000840001		Bacteria	Proteobacteria	Gammaproteobacteria	Pseudomonadales	Pseudomonadaceae	Pseudomonas	Pseudomonas aeruginosa			1.4596	1.4596	1.4596	1.4596	1
28211	class	2|1224|28211	Bacteria	Proteobacteria	Alphaproteobacteria							1.7325		0.0606376		Bacteria	Proteobacteria	Gammaproteobacteria	Xanthomonadales	Xanthomonadaceae	Lysobacter	Lysobacter oryzae			0.1887	0.1887	0.0795	0.0795	1
186802	order	2|1239|186801|186802	Bacteria	Firmicutes	Clostridia	Clostridiales						0.2734	28.5713	0.00956904		Bacteria	Proteobacteria	Gammaproteobacteria	Xanthomonadales	Xanthomonadaceae	Rhodanobacter	Rhodanobacter_sp			0.1887	0.1887	0.0108	0.0108	1
200666	order	2|976|117747|200666	Bacteria	Bacteroidetes	Sphingobacteriia	Sphingobacteriales						5.2233		0.182816		Bacteria	Proteobacteria	Gammaproteobacteria	Xanthomonadales	Xanthomonadaceae	Xylella	Xylella fastidiosa			0.1887	0.1887	0.0985	0.0985	1
204455	order	2|1224|28211|204455	Bacteria	Proteobacteria	Alphaproteobacteria	Rhodobacterales						1.7325		0.0606378		Bacteria	Tenericutes	Mollicutes	Anaeroplasmatales	Anaeroplasmataceae	Anaeroplasma	Anaeroplasma bactoclasticum			2.8196	2.8196	2.8196	2.8196	4
186332	order	2|544448|31969|186332	Bacteria	Tenericutes	Mollicutes	Anaeroplasmatales						2.8196		0.0986864
909929	order	2|1239|909932|909929	Bacteria	Firmicutes	Negativicutes	Selenomonadales						6.8179		0.238628		superkingdom	phylum	class	order	family	genus	species	strain					28.5718
72274	order	2|1224|1236|72274	Bacteria	Proteobacteria	Gammaproteobacteria	Pseudomonadales						1.4596		0.0510862		Bacteria	Actinobacteria	Actinobacteria	Actinomycetales	Intrasporangiaceae	Tetrasphaera	Tetrasphaera duodecadis	Tetrasphaera duodecadis strain					3.6069	0.12624
135614	order	2|1224|1236|135614	Bacteria	Proteobacteria	Gammaproteobacteria	Xanthomonadales						0.1887		0.00660453		Bacteria	Actinobacteria	Actinobacteria	Actinomycetales	Actinomycetales_f	Actinomycetales_g	Actinomycetales_sp	Actinomycetales strain					0.2705	0.00946738
388448	order	2|200795|388447|388448	Bacteria	Chloroflexi	Ktedonobacteria	Ktedonobacterales						1.3461		0.0471137		Bacteria	Bacteroidetes	Flavobacteriia	Flavobacteriales	Flavobacteriaceae	Nonlabens	Nonlabens dokdonensis	Nonlabens dokdonensis strain					0.024	0.000839989
2037	order	2|201174|1760|2037	Bacteria	Actinobacteria	Actinobacteria	Actinomycetales						3.8774		0.13571		Bacteria	Bacteroidetes	Sphingobacteriia	Sphingobacteriales	Chitinophagaceae	Flavisolibacter	Flavisolibacter ginsengisoli	Flavisolibacter ginsengisoli DSM 18119 strain					0.1657	0.00579942
213118	order	2|1224|28221|213118	Bacteria	Proteobacteria	Deltaproteobacteria	Desulfobacterales						0.4606		0.0161211		Bacteria	Bacteroidetes	Sphingobacteriia	Sphingobacteriales	Chitinophagaceae	Flavisolibacter	Flavisolibacter ginsengiterrae	Flavisolibacter ginsengiterrae DSM 18136 strain					0.2622	0.00917688
1385	order	2|1239|91061|1385	Bacteria	Firmicutes	Bacilli	Bacillales						2.2267		0.0779349		Bacteria	Bacteroidetes	Sphingobacteriia	Sphingobacteriales	Chitinophagaceae	Hydrotalea	Hydrotalea sandarakina	Hydrotalea sandarakina strain					0.0147	0.000514493
80840	order	2|1224|28216|80840	Bacteria	Proteobacteria	Betaproteobacteria	Burkholderiales						1.9597		0.0685898		Bacteria	Bacteroidetes	Sphingobacteriia	Sphingobacteriales	Chitinophagaceae	Hydrotalea	Hydrotalea sandarakina	Hydrotalea sandarakina strain					1.0556	0.0369455
206351	order	2|1224|28216|206351	Bacteria	Proteobacteria	Betaproteobacteria	Neisseriales						0.1618		0.00566303		Bacteria	Bacteroidetes	Sphingobacteriia	Sphingobacteriales	Chitinophagaceae	Hydrotalea	Hydrotalea sandarakina	Hydrotalea sandarakina strain					0.098	0.00342996
200644	order	2|976|117743|200644	Bacteria	Bacteroidetes	Flavobacteriia	Flavobacteriales						0.024		0.000840004		Bacteria	Bacteroidetes	Sphingobacteriia	Sphingobacteriales	Chitinophagaceae	Hydrotalea	Hydrotalea sandarakina	Hydrotalea sandarakina strain					0.4228	0.0147978
31979	family	2|1239|186801|186802|31979	Bacteria	Firmicutes	Clostridia	Clostridiales	Clostridiaceae					0.0711	28.5714	0.0024885		Bacteria	Bacteroidetes	Sphingobacteriia	Sphingobacteriales	Chitinophagaceae	Hydrotalea	Hydrotalea sandarakina	Hydrotalea sandarakina strain					2.0899	0.0731455
85021	family	2|201174|1760|2037|85021	Bacteria	Actinobacteria	Actinobacteria	Actinomycetales	Intrasporangiaceae					3.6069		0.126242		Bacteria	Bacteroidetes	Sphingobacteriia	Sphingobacteriales	Chitinophagaceae	Hydrotalea	Hydrotalea sandarakina	Hydrotalea sandarakina strain					1.1144	0.0390035
			Bacteria	Actinobacteria	Actinobacteria	Actinomycetales	Actinomycetales_f					0.2705				Bacteria	Chloroflexi	Ktedonobacteria	Ktedonobacterales	Thermosporotrichaceae	Thermosporothrix	Thermosporothrix hazakensis	Thermosporothrix hazakensis strain					1.3461	0.0471129
80864	family	2|1224|28216|80840|80864	Bacteria	Proteobacteria	Betaproteobacteria	Burkholderiales	Comamonadaceae					0.0855		0.0029925		Bacteria	Firmicutes	Bacilli	Bacillales	Bacillales_f	Bacillales_g	Bacillales_sp	Bacillales strain					0.2684	0.00939388
186333	family	2|544448|31969|186332|186333	Bacteria	Tenericutes	Mollicutes	Anaeroplasmatales	Anaeroplasmataceae					2.8196		0.0986861		Bacteria	Firmicutes	Bacilli	Bacillales	Bacillales_f	Bacillales_g	Bacillales_sp	Bacillales strain					0.3609	0.0126313
186804	family	2|1239|186801|186802|186804	Bacteria	Firmicutes	Clostridia	Clostridiales	Peptostreptococcaceae					0.1617		0.00565951		Bacteria	Firmicutes	Bacilli	Bacillales	Bacillales_f	Bacillales_g	Bacillales_sp	Bacillales strain					0.4932	0.0172618
1499392	family	2|1224|28216|206351|1499392	Bacteria	Proteobacteria	Betaproteobacteria	Neisseriales	Chromobacteriaceae					0.1618		0.00566301		Bacteria	Firmicutes	Bacilli	Bacillales	Bacillales_f	Bacillales_g	Bacillales_sp	Bacillales strain					0.0899	0.00314646
75682	family	2|1224|28216|80840|75682	Bacteria	Proteobacteria	Betaproteobacteria	Burkholderiales	Oxalobacteraceae					1.8742		0.0655971		Bacteria	Firmicutes	Bacilli	Bacillales	Bacillales_f	Bacillales_g	Bacillales_sp	Bacillales strain					1.0144	0.0355035
563835	family	2|976|117747|200666|563835	Bacteria	Bacteroidetes	Sphingobacteriia	Sphingobacteriales	Chitinophagaceae					5.2233		0.182816		Bacteria	Firmicutes	Clostridia	Clostridiales	Clostridiaceae	Anaerosporobacter	Anaerosporobacter mobilis	Anaerosporobacter mobilis DSM 15930 strain					0.0314	0.00109899
135621	family	2|1224|1236|72274|135621	Bacteria	Proteobacteria	Gammaproteobacteria	Pseudomonadales	Pseudomonadaceae					1.4596		0.0510861		Bacteria	Firmicutes	Clostridia	Clostridiales	Clostridiaceae	Clostridium	Clostridium caminithermale	Clostridium caminithermale DSM 15212 strain					0.0397	0.00138948
31989	family	2|1224|28211|204455|31989	Bacteria	Proteobacteria	Alphaproteobacteria	Rhodobacterales	Rhodobacteraceae					1.7325		0.0606376		Bacteria	Firmicutes	Clostridia	Clostridiales	Peptostreptococcaceae	Tepidibacter	Tepidibacter formicigenes	Tepidibacter formicigenes DSM 15518 strain					0.1617	0.00565943
31977	family	2|1239|909932|909929|31977	Bacteria	Firmicutes	Negativicutes	Selenomonadales	Veillonellaceae					6.8179		0.238627		Bacteria	Firmicutes	Clostridia	Clostridiales	Proteinivoraceae	Anaerobranca	Anaerobranca californiensis	Anaerobranca californiensis DSM 14826 strain					0.0407	0.00142448
32033	family	2|1224|1236|135614|32033	Bacteria	Proteobacteria	Gammaproteobacteria	Xanthomonadales	Xanthomonadaceae					0.1887		0.00660451		Bacteria	Firmicutes	Negativicutes	Selenomonadales	Veillonellaceae	Schwartzia	Schwartzia succinivorans	Schwartzia succinivorans DSM 10502 strain					6.8179	0.238623
213119	family	2|1224|28221|213118|213119	Bacteria	Proteobacteria	Deltaproteobacteria	Desulfobacterales	Desulfobacteraceae					0.4606		0.016121		Bacteria	Proteobacteria	Alphaproteobacteria	Rhodobacterales	Rhodobacteraceae	Albidovulum	Albidovulum xiamenense	Albidovulum xiamenense strain					0.0855	0.00299246
49546	family	2|976|117743|200644|49546	Bacteria	Bacteroidetes	Flavobacteriia	Flavobacteriales	Flavobacteriaceae					0.024		0.000840001		Bacteria	Proteobacteria	Alphaproteobacteria	Rhodobacterales	Rhodobacteraceae	Defluviimonas	Defluviimonas denitrificans	Defluviimonas denitrificans strain					0.0305	0.00106749
768649	family	2|200795|388447|388448|768649	Bacteria	Chloroflexi	Ktedonobacteria	Ktedonobacterales	Thermosporotrichaceae					1.3461		0.0471135		Bacteria	Proteobacteria	Alphaproteobacteria	Rhodobacterales	Rhodobacteraceae	Paracoccus	Paracoccus denitrificans	Paracoccus denitrificans strain					1.8438	0.0645322
1491775	family	2|1239|186801|186802|1491775	Bacteria	Firmicutes	Clostridia	Clostridiales	Proteinivoraceae					0.0407		0.0014245		Bacteria	Proteobacteria	Alphaproteobacteria	Rhodobacterales	Rhodobacteraceae	Paracoccus	Paracoccus denitrificans	Paracoccus denitrificans strain					0.4606	0.0161208
			Bacteria	Firmicutes	Bacilli	Bacillales	Bacillales_f					2.2267		0.0779346		Bacteria	Proteobacteria	Alphaproteobacteria	Rhodobacterales	Rhodobacteraceae	Paracoccus	Paracoccus denitrificans	Paracoccus denitrificans strain					0.1618	0.00566293
55506	genus	2|1239|909932|909929|31977|55506	Bacteria	Firmicutes	Negativicutes	Selenomonadales	Veillonellaceae	Schwartzia				6.8179	28.5717	0.238624		Bacteria	Proteobacteria	Betaproteobacteria	Burkholderiales	Comamonadaceae	Lampropedia	Lampropedia hyalina	Lampropedia hyalina DSM 16112 strain					1.4596	0.0510853
			Bacteria	Actinobacteria	Actinobacteria	Actinomycetales	Actinomycetales_f	Actinomycetales_g				0.2705		0.00946741		Bacteria	Proteobacteria	Betaproteobacteria	Burkholderiales	Oxalobacteraceae	Janthinobacterium	Janthinobacterium_sp	Janthinobacterium strain					0.1069	0.00374145
			Bacteria	Firmicutes	Bacilli	Bacillales	Bacillales_f	Bacillales_g				2.2267		0.0779338		Bacteria	Proteobacteria	Betaproteobacteria	Burkholderiales	Oxalobacteraceae	Janthinobacterium	Janthinobacterium_sp	Janthinobacterium strain					0.7266	0.0254307
205889	genus	2|1224|28211|204455|31989|205889	Bacteria	Proteobacteria	Alphaproteobacteria	Rhodobacterales	Rhodobacteraceae	Albidovulum				0.1069		0.00374146		Bacteria	Proteobacteria	Betaproteobacteria	Neisseriales	Chromobacteriaceae	Andreprevotia	Andreprevotia lacus	Andreprevotia lacus DSM 23236 strain					0.1102	0.00385695
68	genus	2|1224|1236|135614|32033|68	Bacteria	Proteobacteria	Gammaproteobacteria	Xanthomonadales	Xanthomonadaceae	Lysobacter				0.0795		0.00278247		Bacteria	Proteobacteria	Deltaproteobacteria	Desulfobacterales	Desulfobacteraceae	Desulfatibacillum	Desulfatibacillum alkenivorans	Desulfatibacillum alkenivorans DSM 16219 strain					0.4385	0.0153473
1485	genus	2|1239|186801|186802|31979|1485	Bacteria	Firmicutes	Clostridia	Clostridiales	Clostridiaceae	Clostridium				0.0397		0.00138949		Bacteria	Proteobacteria	Gammaproteobacteria	Pseudomonadales	Pseudomonadaceae	Pseudomonas	Pseudomonas aeruginosa	Pseudomonas aeruginosa DSM 50071 strain					0.3504	0.0122638
42447	genus	2|1239|186801|186802|1491775|42447	Bacteria	Firmicutes	Clostridia	Clostridiales	Proteinivoraceae	Anaerobranca				0.0407		0.00142449		Bacteria	Proteobacteria	Gammaproteobacteria	Xanthomonadales	Xanthomonadaceae	Lysobacter	Lysobacter oryzae	Lysobacter oryzae DSM 21044 strain					0.0795	0.00278246
397275	genus	2|1224|28216|206351|1499392|397275	Bacteria	Proteobacteria	Betaproteobacteria	Neisseriales	Chromobacteriaceae	Andreprevotia				0.1618		0.00566295		Bacteria	Proteobacteria	Gammaproteobacteria	Xanthomonadales	Xanthomonadaceae	Rhodanobacter	Rhodanobacter_sp	Rhodanobacter strain					0.0108	0.000377995
398041	genus	2|976|117747|200666|563835|398041	Bacteria	Bacteroidetes	Sphingobacteriia	Sphingobacteriales	Chitinophagaceae	Flavisolibacter				0.428		0.0149799		Bacteria	Proteobacteria	Gammaproteobacteria	Xanthomonadales	Xanthomonadaceae	Xylella	Xylella fastidiosa	Xylella fastidiosa strain					0.0985	0.00344746
214904	genus	2|1239|186801|186802|186804|214904	Bacteria	Firmicutes	Clostridia	Clostridiales	Peptostreptococcaceae	Tepidibacter				0.1617		0.00565945		Bacteria	Tenericutes	Mollicutes	Anaeroplasmatales	Anaeroplasmataceae	Anaeroplasma	Anaeroplasma bactoclasticum	Anaeroplasma bactoclasticum strain					0.1118	0.00391295
198705	genus	2|1224|28216|80840|80864|198705	Bacteria	Proteobacteria	Betaproteobacteria	Burkholderiales	Comamonadaceae	Lampropedia				0.0855		0.00299247		Bacteria	Tenericutes	Mollicutes	Anaeroplasmatales	Anaeroplasmataceae	Anaeroplasma	Anaeroplasma bactoclasticum	Anaeroplasma bactoclasticum strain					0.6392	0.0223717
99479	genus	2|201174|1760|2037|85021|99479	Bacteria	Actinobacteria	Actinobacteria	Actinomycetales	Intrasporangiaceae	Tetrasphaera				3.6069		0.12624		Bacteria	Tenericutes	Mollicutes	Anaeroplasmatales	Anaeroplasmataceae	Anaeroplasma	Anaeroplasma bactoclasticum	Anaeroplasma bactoclasticum strain					0.2231	0.0078084
653683	genus	2|1239|186801|186802|31979|653683	Bacteria	Firmicutes	Clostridia	Clostridiales	Clostridiaceae	Anaerosporobacter				0.0314		0.00109899		Bacteria	Tenericutes	Mollicutes	Anaeroplasmatales	Anaeroplasmataceae	Anaeroplasma	Anaeroplasma bactoclasticum	Anaeroplasma bactoclasticum strain					1.8455	0.0645917
286	genus	2|1224|1236|72274|135621|286	Bacteria	Proteobacteria	Gammaproteobacteria	Pseudomonadales	Pseudomonadaceae	Pseudomonas				1.4596		0.0510855
29580	genus	2|1224|28216|80840|75682|29580	Bacteria	Proteobacteria	Betaproteobacteria	Burkholderiales	Oxalobacteraceae	Janthinobacterium				1.8742		0.0655964														0.0108
768650	genus	2|200795|388447|388448|768649|768650	Bacteria	Chloroflexi	Ktedonobacteria	Ktedonobacterales	Thermosporotrichaceae	Thermosporothrix				1.3461		0.0471131														99796358	reads	Total
1097466	genus	2|1224|28211|204455|31989|1097466	Bacteria	Proteobacteria	Alphaproteobacteria	Rhodobacterales	Rhodobacteraceae	Defluviimonas				0.7266		0.0254308														83827.9	reads	Nonlabens dokdonensis
265	genus	2|1224|28211|204455|31989|265	Bacteria	Proteobacteria	Alphaproteobacteria	Rhodobacterales	Rhodobacteraceae	Paracoccus				0.8991		0.0314682														3914632	genome
75309	genus	2|1224|1236|135614|32033|75309	Bacteria	Proteobacteria	Gammaproteobacteria	Xanthomonadales	Xanthomonadaceae	Rhodanobacter				0.0108		0.000377996														3.2121	depth
218207	genus	2|1224|28221|213118|213119|218207	Bacteria	Proteobacteria	Deltaproteobacteria	Desulfobacterales	Desulfobacteraceae	Desulfatibacillum				0.4606		0.0161208
2086	genus	2|544448|31969|186332|186333|2086	Bacteria	Tenericutes	Mollicutes	Anaeroplasmatales	Anaeroplasmataceae	Anaeroplasma				2.8196		0.0986851
363408	genus	2|976|117743|200644|49546|363408	Bacteria	Bacteroidetes	Flavobacteriia	Flavobacteriales	Flavobacteriaceae	Nonlabens				0.024		0.000839992
1004300	genus	2|976|117747|200666|563835|1004300	Bacteria	Bacteroidetes	Sphingobacteriia	Sphingobacteriales	Chitinophagaceae	Hydrotalea				4.7954		0.167837
2370	genus	2|1224|1236|135614|32033|2370	Bacteria	Proteobacteria	Gammaproteobacteria	Xanthomonadales	Xanthomonadaceae	Xylella				0.0985		0.00344747
55507	species	2|1239|909932|909929|31977|55506|55507	Bacteria	Firmicutes	Negativicutes	Selenomonadales	Veillonellaceae	Schwartzia	Schwartzia succinivorans			6.8179
			Bacteria	Firmicutes	Bacilli	Bacillales	Bacillales_f	Bacillales_g	Bacillales_sp			2.2267
			Bacteria	Actinobacteria	Actinobacteria	Actinomycetales	Actinomycetales_f	Actinomycetales_g	Actinomycetales_sp			0.2705
			Bacteria	Proteobacteria	Betaproteobacteria	Burkholderiales	Oxalobacteraceae	Janthinobacterium	Janthinobacterium_sp			1.8742
			Bacteria	Proteobacteria	Gammaproteobacteria	Xanthomonadales	Xanthomonadaceae	Rhodanobacter	Rhodanobacter_sp			0.0108
32644	species	||||||32644							unidentified			58.5421
498057	species	2|1224|1236|135614|32033|68|498057	Bacteria	Proteobacteria	Gammaproteobacteria	Xanthomonadales	Xanthomonadaceae	Lysobacter	Lysobacter oryzae			0.0795
182411	species	2|1239|186801|186802|1491775|42447|182411	Bacteria	Firmicutes	Clostridia	Clostridiales	Proteinivoraceae	Anaerobranca	Anaerobranca californiensis			0.0407
398045	species	2|976|117747|200666|563835|398041|398045	Bacteria	Bacteroidetes	Sphingobacteriia	Sphingobacteriales	Chitinophagaceae	Flavisolibacter	Flavisolibacter ginsengiterrae			0.2622
1121000	species	2|1224|28216|206351|1499392|397275|1121000	Bacteria	Proteobacteria	Betaproteobacteria	Neisseriales	Chromobacteriaceae	Andreprevotia	Andreprevotia lacus			0.1618
198706	species	2|1224|28216|80840|80864|198705|198706	Bacteria	Proteobacteria	Betaproteobacteria	Burkholderiales	Comamonadaceae	Lampropedia	Lampropedia hyalina			0.0855
990712	species	2|1224|28211|204455|31989|205889|990712	Bacteria	Proteobacteria	Alphaproteobacteria	Rhodobacterales	Rhodobacteraceae	Albidovulum	Albidovulum xiamenense			0.1069
45202	species	||||||45202							unidentified plasmid			6.5401
287	species	2|1224|1236|72274|135621|286|287	Bacteria	Proteobacteria	Gammaproteobacteria	Pseudomonadales	Pseudomonadaceae	Pseudomonas	Pseudomonas aeruginosa			1.4596
259354	species	2|1224|28221|213118|213119|218207|259354	Bacteria	Proteobacteria	Deltaproteobacteria	Desulfobacterales	Desulfobacteraceae	Desulfatibacillum	Desulfatibacillum alkenivorans			0.4606
227138	species	2|1239|186801|186802|186804|214904|227138	Bacteria	Firmicutes	Clostridia	Clostridiales	Peptostreptococcaceae	Tepidibacter	Tepidibacter formicigenes			0.1617
644383	species	2|200795|388447|388448|768649|768650|644383	Bacteria	Chloroflexi	Ktedonobacteria	Ktedonobacterales	Thermosporotrichaceae	Thermosporothrix	Thermosporothrix hazakensis			1.3461
266	species	2|1224|28211|204455|31989|265|266	Bacteria	Proteobacteria	Alphaproteobacteria	Rhodobacterales	Rhodobacteraceae	Paracoccus	Paracoccus denitrificans			0.8991
191027	species	2|1239|186801|186802|31979|1485|191027	Bacteria	Firmicutes	Clostridia	Clostridiales	Clostridiaceae	Clostridium	Clostridium caminithermale			0.0397
2088	species	2|544448|31969|186332|186333|2086|2088	Bacteria	Tenericutes	Mollicutes	Anaeroplasmatales	Anaeroplasmataceae	Anaeroplasma	Anaeroplasma bactoclasticum			2.8196
173053	species	2|201174|1760|2037|85021|99479|173053	Bacteria	Actinobacteria	Actinobacteria	Actinomycetales	Intrasporangiaceae	Tetrasphaera	Tetrasphaera duodecadis			3.6069
1004304	species	2|976|117747|200666|563835|1004300|1004304	Bacteria	Bacteroidetes	Sphingobacteriia	Sphingobacteriales	Chitinophagaceae	Hydrotalea	Hydrotalea sandarakina			4.7954
462367	species	2|976|117747|200666|563835|398041|462367	Bacteria	Bacteroidetes	Sphingobacteriia	Sphingobacteriales	Chitinophagaceae	Flavisolibacter	Flavisolibacter ginsengisoli			0.1657
328515	species	2|976|117743|200644|49546|363408|328515	Bacteria	Bacteroidetes	Flavobacteriia	Flavobacteriales	Flavobacteriaceae	Nonlabens	Nonlabens dokdonensis			0.024
404881	species	2|1224|28211|204455|31989|1097466|404881	Bacteria	Proteobacteria	Alphaproteobacteria	Rhodobacterales	Rhodobacteraceae	Defluviimonas	Defluviimonas denitrificans			0.7266
2371	species	2|1224|1236|135614|32033|2370|2371	Bacteria	Proteobacteria	Gammaproteobacteria	Xanthomonadales	Xanthomonadaceae	Xylella	Xylella fastidiosa			0.0985
264463	species	2|1239|186801|186802|31979|653683|264463	Bacteria	Firmicutes	Clostridia	Clostridiales	Clostridiaceae	Anaerosporobacter	Anaerosporobacter mobilis			0.0314
173053	strain	2|201174|1760|2037|85021|99479|173053|173053.1	Bacteria	Actinobacteria	Actinobacteria	Actinomycetales	Intrasporangiaceae	Tetrasphaera	Tetrasphaera duodecadis	Tetrasphaera duodecadis strain		3.6069
2037.1	strain	2|201174|1760|2037||||2037.1	Bacteria	Actinobacteria	Actinobacteria	Actinomycetales				Actinomycetales strain		0.2705
328515	strain	2|976|117743|200644|49546|363408|328515|328515.1	Bacteria	Bacteroidetes	Flavobacteriia	Flavobacteriales	Flavobacteriaceae	Nonlabens	Nonlabens dokdonensis	Nonlabens dokdonensis strain		0.024
1.12188e+06	strain	2|976|117747|200666|563835|398041|462367|1121884.1	Bacteria	Bacteroidetes	Sphingobacteriia	Sphingobacteriales	Chitinophagaceae	Flavisolibacter	Flavisolibacter ginsengisoli	Flavisolibacter ginsengisoli DSM 18119 strain		0.1657
1.12189e+06	strain	2|976|117747|200666|563835|398041|398045|1121885.1	Bacteria	Bacteroidetes	Sphingobacteriia	Sphingobacteriales	Chitinophagaceae	Flavisolibacter	Flavisolibacter ginsengiterrae	Flavisolibacter ginsengiterrae DSM 18136 strain		0.2622
1.0043e+06	strain	2|976|117747|200666|563835|1004300|1004304|1004304.5	Bacteria	Bacteroidetes	Sphingobacteriia	Sphingobacteriales	Chitinophagaceae	Hydrotalea	Hydrotalea sandarakina	Hydrotalea sandarakina strain		0.0147
1.0043e+06	strain	2|976|117747|200666|563835|1004300|1004304|1004304.6	Bacteria	Bacteroidetes	Sphingobacteriia	Sphingobacteriales	Chitinophagaceae	Hydrotalea	Hydrotalea sandarakina	Hydrotalea sandarakina strain		1.0556
1.0043e+06	strain	2|976|117747|200666|563835|1004300|1004304|1004304.1	Bacteria	Bacteroidetes	Sphingobacteriia	Sphingobacteriales	Chitinophagaceae	Hydrotalea	Hydrotalea sandarakina	Hydrotalea sandarakina strain		0.098
1.0043e+06	strain	2|976|117747|200666|563835|1004300|1004304|1004304.3	Bacteria	Bacteroidetes	Sphingobacteriia	Sphingobacteriales	Chitinophagaceae	Hydrotalea	Hydrotalea sandarakina	Hydrotalea sandarakina strain		0.4228
1.0043e+06	strain	2|976|117747|200666|563835|1004300|1004304|1004304.2	Bacteria	Bacteroidetes	Sphingobacteriia	Sphingobacteriales	Chitinophagaceae	Hydrotalea	Hydrotalea sandarakina	Hydrotalea sandarakina strain		2.0899
1.0043e+06	strain	2|976|117747|200666|563835|1004300|1004304|1004304.4	Bacteria	Bacteroidetes	Sphingobacteriia	Sphingobacteriales	Chitinophagaceae	Hydrotalea	Hydrotalea sandarakina	Hydrotalea sandarakina strain		1.1144
644383	strain	2|200795|388447|388448|768649|768650|644383|644383.1	Bacteria	Chloroflexi	Ktedonobacteria	Ktedonobacterales	Thermosporotrichaceae	Thermosporothrix	Thermosporothrix hazakensis	Thermosporothrix hazakensis strain		1.3461
1385.5	strain	2|1239|91061|1385||||1385.5	Bacteria	Firmicutes	Bacilli	Bacillales				Bacillales strain		0.2684
1385.4	strain	2|1239|91061|1385||||1385.4	Bacteria	Firmicutes	Bacilli	Bacillales				Bacillales strain		0.3609
1385.1	strain	2|1239|91061|1385||||1385.1	Bacteria	Firmicutes	Bacilli	Bacillales				Bacillales strain		0.4932
1385.3	strain	2|1239|91061|1385||||1385.3	Bacteria	Firmicutes	Bacilli	Bacillales				Bacillales strain		0.0899
1385.2	strain	2|1239|91061|1385||||1385.2	Bacteria	Firmicutes	Bacilli	Bacillales				Bacillales strain		1.0144
1.121e+06	strain	2|1239|186801|186802|31979|653683|264463|1120996.1	Bacteria	Firmicutes	Clostridia	Clostridiales	Clostridiaceae	Anaerosporobacter	Anaerosporobacter mobilis	Anaerosporobacter mobilis DSM 15930 strain		0.0314
1.1213e+06	strain	2|1239|186801|186802|31979|1485|191027|1121301.1	Bacteria	Firmicutes	Clostridia	Clostridiales	Clostridiaceae	Clostridium	Clostridium caminithermale	Clostridium caminithermale DSM 15212 strain		0.0397
1.12335e+06	strain	2|1239|186801|186802|186804|214904|227138|1123349.1	Bacteria	Firmicutes	Clostridia	Clostridiales	Peptostreptococcaceae	Tepidibacter	Tepidibacter formicigenes	Tepidibacter formicigenes DSM 15518 strain		0.1617
1.12099e+06	strain	2|1239|186801|186802|1491775|42447|182411|1120989.1	Bacteria	Firmicutes	Clostridia	Clostridiales	Proteinivoraceae	Anaerobranca	Anaerobranca californiensis	Anaerobranca californiensis DSM 14826 strain		0.0407
1.12324e+06	strain	2|1239|909932|909929|31977|55506|55507|1123243.1	Bacteria	Firmicutes	Negativicutes	Selenomonadales	Veillonellaceae	Schwartzia	Schwartzia succinivorans	Schwartzia succinivorans DSM 10502 strain		6.8179
1.12216e+06	strain	2|1224|28216|80840|80864|198705|198706|1122156.1	Bacteria	Proteobacteria	Betaproteobacteria	Burkholderiales	Comamonadaceae	Lampropedia	Lampropedia hyalina	Lampropedia hyalina DSM 16112 strain		0.0855
29580.1	strain	2|1224|28216|80840|75682|29580||29580.1	Bacteria	Proteobacteria	Betaproteobacteria	Burkholderiales	Oxalobacteraceae	Janthinobacterium		Janthinobacterium strain		0.0305
29580.2	strain	2|1224|28216|80840|75682|29580||29580.2	Bacteria	Proteobacteria	Betaproteobacteria	Burkholderiales	Oxalobacteraceae	Janthinobacterium		Janthinobacterium strain		1.8438
1.12139e+06	strain	2|1224|28221|213118|213119|218207|259354|1121393.1	Bacteria	Proteobacteria	Deltaproteobacteria	Desulfobacterales	Desulfobacteraceae	Desulfatibacillum	Desulfatibacillum alkenivorans	Desulfatibacillum alkenivorans DSM 16219 strain		0.4606
1.121e+06	strain	2|1224|28216|206351|1499392|397275|1121000|1121001.1	Bacteria	Proteobacteria	Betaproteobacteria	Neisseriales	Chromobacteriaceae	Andreprevotia	Andreprevotia lacus	Andreprevotia lacus DSM 23236 strain		0.1618
1.12302e+06	strain	2|1224|1236|72274|135621|286|287|1123015.1	Bacteria	Proteobacteria	Gammaproteobacteria	Pseudomonadales	Pseudomonadaceae	Pseudomonas	Pseudomonas aeruginosa	Pseudomonas aeruginosa DSM 50071 strain		1.4596
990712	strain	2|1224|28211|204455|31989|205889|990712|990712.1	Bacteria	Proteobacteria	Alphaproteobacteria	Rhodobacterales	Rhodobacteraceae	Albidovulum	Albidovulum xiamenense	Albidovulum xiamenense strain		0.1069
404881	strain	2|1224|28211|204455|31989|1097466|404881|404881.1	Bacteria	Proteobacteria	Alphaproteobacteria	Rhodobacterales	Rhodobacteraceae	Defluviimonas	Defluviimonas denitrificans	Defluviimonas denitrificans strain		0.7266
266.1	strain	2|1224|28211|204455|31989|265|266|266.1	Bacteria	Proteobacteria	Alphaproteobacteria	Rhodobacterales	Rhodobacteraceae	Paracoccus	Paracoccus denitrificans	Paracoccus denitrificans strain		0.1102
266.3	strain	2|1224|28211|204455|31989|265|266|266.3	Bacteria	Proteobacteria	Alphaproteobacteria	Rhodobacterales	Rhodobacteraceae	Paracoccus	Paracoccus denitrificans	Paracoccus denitrificans strain		0.4385
266.2	strain	2|1224|28211|204455|31989|265|266|266.2	Bacteria	Proteobacteria	Alphaproteobacteria	Rhodobacterales	Rhodobacteraceae	Paracoccus	Paracoccus denitrificans	Paracoccus denitrificans strain		0.3504
1.12219e+06	strain	2|1224|1236|135614|32033|68|498057|1122187.1	Bacteria	Proteobacteria	Gammaproteobacteria	Xanthomonadales	Xanthomonadaceae	Lysobacter	Lysobacter oryzae	Lysobacter oryzae DSM 21044 strain		0.0795
75309.1	strain	2|1224|1236|135614|32033|75309||75309.1	Bacteria	Proteobacteria	Gammaproteobacteria	Xanthomonadales	Xanthomonadaceae	Rhodanobacter		Rhodanobacter strain		0.0108
2371.1	strain	2|1224|1236|135614|32033|2370|2371|2371.1	Bacteria	Proteobacteria	Gammaproteobacteria	Xanthomonadales	Xanthomonadaceae	Xylella	Xylella fastidiosa	Xylella fastidiosa strain		0.0985
2088.2	strain	2|544448|31969|186332|186333|2086|2088|2088.2	Bacteria	Tenericutes	Mollicutes	Anaeroplasmatales	Anaeroplasmataceae	Anaeroplasma	Anaeroplasma bactoclasticum	Anaeroplasma bactoclasticum strain		0.1118
2088.3	strain	2|544448|31969|186332|186333|2086|2088|2088.3	Bacteria	Tenericutes	Mollicutes	Anaeroplasmatales	Anaeroplasmataceae	Anaeroplasma	Anaeroplasma bactoclasticum	Anaeroplasma bactoclasticum strain		0.6392
2088.1	strain	2|544448|31969|186332|186333|2086|2088|2088.1	Bacteria	Tenericutes	Mollicutes	Anaeroplasmatales	Anaeroplasmataceae	Anaeroplasma	Anaeroplasma bactoclasticum	Anaeroplasma bactoclasticum strain		0.2231
2088.4	strain	2|544448|31969|186332|186333|2086|2088|2088.4	Bacteria	Tenericutes	Mollicutes	Anaeroplasmatales	Anaeroplasmataceae	Anaeroplasma	Anaeroplasma bactoclasticum	Anaeroplasma bactoclasticum strain		1.8455
32644.6	strain	||||||32644|32644.6							unidentified	unidentified strain		1.1556
32644.4	strain	||||||32644|32644.4							unidentified	unidentified strain		0.1632
32644.5	strain	||||||32644|32644.5							unidentified	unidentified strain		0.1624
32644.2	strain	||||||32644|32644.2							unidentified	unidentified strain		0.0695
32644.3	strain	||||||32644|32644.3							unidentified	unidentified strain		56.9428
32644.1	strain	||||||32644|32644.1							unidentified	unidentified strain		0.0487
45202.2	strain	||||||45202|45202.2							unidentified plasmid	unidentified plasmid strain		0.0697
45202.3	strain	||||||45202|45202.3							unidentified plasmid	unidentified plasmid strain		0.1123
45202.1	strain	||||||45202|45202.1							unidentified plasmid	unidentified plasmid strain		0.0922
45202.6	strain	||||||45202|45202.6							unidentified plasmid	unidentified plasmid strain		2.4101
45202.7	strain	||||||45202|45202.7							unidentified plasmid	unidentified plasmid strain		0.6087
45202.4	strain	||||||45202|45202.4							unidentified plasmid	unidentified plasmid strain		0.1315
45202.5	strain	||||||45202|45202.5							unidentified plasmid	unidentified plasmid strain		3.1157
10239.6	strain	10239|||||||10239.6	Viruses							Viruses strain		1.7071
10239.4	strain	10239|||||||10239.4	Viruses							Viruses strain		0.3908
10239.5	strain	10239|||||||10239.5	Viruses							Viruses strain		0.0162
10239.2	strain	10239|||||||10239.2	Viruses							Viruses strain		0.1482
10239.3	strain	10239|||||||10239.3	Viruses							Viruses strain		0.5422
10239.1	strain	10239|||||||10239.1	Viruses							Viruses strain		3.2053
10239.7	strain	10239|||||||10239.7	Viruses							Viruses strain		0.3366

## Sheet: CAMI genomes v4 region
Mapping V4 regions to RefSeq									Species/Contig	Reads		Distinct Species	Count	Depth		WGS-16S reads mapping to V4 from contigs (depth of overage)								read	contig		contig	Count
H	13383	292	100	+	0	0	452I292M690I	RL|S1|C6421#0	Albidovulum_xiamenense_strain_YBY-7_(NR_118031.1)	18		Albidovulum_xiamenense_strain_YBY-7_(NR_118031.1)	1	18		H	0	150	100	+	0	0	118I150M24I	RL|S1|R11396789/1	RL|S1|C274#0		RL|S1|C274#0	615
H	4425	291	100	+	0	0	500I291M665I	RL|S1|C17184#0	Anaerobranca_zavarzinii_strain_JW/VK-KS5Y_(NR_044155.1)	11		Anaerobranca_zavarzinii_strain_JW/VK-KS5Y_(NR_044155.1)	1	11		H	0	150	100	+	0	0	12D138M154I	RL|S1|R46013643/1	RL|S1|C274#0		RL|S1|C328#0	156
H	16242	292	100	+	0	0	397I292M631I	RL|S1|C328#0	Defluviimonas_denitrificans_strain_D9-3_(NR_115019.1)	156		Defluviimonas_denitrificans_strain_D9-3_(NR_115019.1)	1	156		H	0	150	100	+	0	0	148I144M6D	RL|S1|R48937715/1	RL|S1|C274#0		RL|S1|C4285#0	100
H	10994	292	100	+	0	0	524I292M708I	RL|S1|C4285#0	Desulfatibacillum_alkenivorans_strain_PF2803_(NR_025795.1)	100		Desulfatibacillum_alkenivorans_strain_PF2803_(NR_025795.1)	1	100		H	0	150	100	+	0	0	159I133M17D	RL|S1|R39919284/1	RL|S1|C274#0		RL|S1|C4952#0	344
H	4855	292	96.9	+	0	0	523I292M735I	RL|S1|C9292#0	Exiguobacterium_acetylicum_strain_DSM_20416_(NR_043479.1)	64		Exiguobacterium_acetylicum_strain_DSM_20416_(NR_043479.1)	5	86.2		H	0	150	100	+	0	0	180I112M38D	RL|S1|R6916149/1	RL|S1|C274#0		RL|S1|C6421#0	18
H	4855	292	99.3	+	0	0	523I292M735I	RL|S1|C10560#0	Exiguobacterium_acetylicum_strain_DSM_20416_(NR_043479.1)	107		Flavisolibacter_ginsengisoli_strain_Gsoil_643_(NR_041500.1)	5	39.8		H	0	150	100	+	0	0	187I105M45D	RL|S1|R42077952/1	RL|S1|C274#0		RL|S1|C7679#0	178
H	4855	292	100	+	0	0	523I292M735I	RL|S1|C12411#0	Exiguobacterium_acetylicum_strain_DSM_20416_(NR_043479.1)	67		Hydrotalea_sandarakina_strain_AF-51_(NR_109380.1)	12	152.667		H	0	150	100	+	0	0	18I150M124I	RL|S1|R41399592/1	RL|S1|C274#0		RL|S1|C8248#0	390
H	4855	292	98.6	+	0	0	523I292M735I	RL|S1|C14115#0	Exiguobacterium_acetylicum_strain_DSM_20416_(NR_043479.1)	188		Lampropedia_hyalina_strain_IAM_14890_(NR_040942.1)	1	20		H	0	150	100	+	0	0	199I93M57D	RL|S1|R46242143/2	RL|S1|C274#0		RL|S1|C9292#0	64
H	4855	292	99.7	+	0	0	523I292M735I	RL|S1|C16600#0	Exiguobacterium_acetylicum_strain_DSM_20416_(NR_043479.1)	5		Lysobacter_oryzae_strain_YC6269_(NR_044484.1)	4	13.5		H	0	150	100	+	0	0	201I91M59D	RL|S1|R12090235/1	RL|S1|C274#0		RL|S1|C9368#0	10
H	6505	292	100	+	0	0	494I292M691I	RL|S1|C1061#0	Flavisolibacter_ginsengisoli_strain_Gsoil_643_(NR_041500.1)	199		Massilia_namucuonensis_strain_333-1-0411_(NR_118215.1)	1	344		H	0	150	100	+	0	0	202I90M60D	RL|S1|R28947689/1	RL|S1|C274#0		RL|S1|C610#0	6
H	6505	292	100	+	0	0	494I292M691I	RL|S1|C8876#0	Flavisolibacter_ginsengisoli_strain_Gsoil_643_(NR_041500.1)			Nonlabens_dokdonensis_(NR_102491.1)	1	6		H	0	150	100	+	0	0	205I87M63D	RL|S1|R38016499/1	RL|S1|C274#0		RL|S1|C9525#0	163
H	6505	292	100	+	0	0	494I292M691I	RL|S1|C2427#0	Flavisolibacter_ginsengisoli_strain_Gsoil_643_(NR_041500.1)			Paracoccus_denitrificans_strain_381_(NR_026456.1)	3	59.3333		H	0	150	100	+	0	0	206I86M64D	RL|S1|R39447176/2	RL|S1|C274#0		RL|S1|C10560#0	107
H	6505	292	100	+	0	0	494I292M691I	RL|S1|C15556#0	Flavisolibacter_ginsengisoli_strain_Gsoil_643_(NR_041500.1)			Pseudomonas_aeruginosa_strain_DSM_50071_(NR_117678.1)	1	390		H	0	150	100	+	0	0	209I83M67D	RL|S1|R32293989/1	RL|S1|C274#0		RL|S1|C11515#0	1520
H	6505	292	100	+	0	0	494I292M691I	RL|S1|C16306#0	Flavisolibacter_ginsengisoli_strain_Gsoil_643_(NR_041500.1)			Schwartzia_succinivorans_strain_S1-1_(NR_029325.1)	1	1520		H	0	150	100	+	0	0	209I83M67D	RL|S1|R34374147/1	RL|S1|C274#0		RL|S1|C11517#0	20
H	2359	292	96.9	+	0	0	509I292M730I	RL|S1|C899#0	Hydrotalea_sandarakina_strain_AF-51_(NR_109380.1)	685		Tepidibacter_formicigenes_strain_DV1184_(NR_029081.1)	1	41		H	0	150	100	+	0	0	211I81M69D	RL|S1|R16498505/1	RL|S1|C274#0		RL|S1|C11782#0	20
H	2359	292	99	+	0	0	509I292M730I	RL|S1|C274#0	Hydrotalea_sandarakina_strain_AF-51_(NR_109380.1)	615		Tetrasphaera_duodecadis_strain_IAM_14868_(NR_040880.1)	1	626		H	0	150	100	+	0	0	212I80M70D	RL|S1|R13221226/1	RL|S1|C274#0		RL|S1|C12411#0	67
H	2359	292	99.7	+	0	0	509I292M730I	RL|S1|C983#0	Hydrotalea_sandarakina_strain_AF-51_(NR_109380.1)	140		Williamsia_phyllosphaerae_strain_C7_(NR_108495.1)	1	47		H	0	150	100	+	0	0	213I79M71D	RL|S1|R24419850/1	RL|S1|C274#0		RL|S1|C12495#0	41
H	2359	292	96.9	+	0	0	509I292M730I	RL|S1|C8086#0	Hydrotalea_sandarakina_strain_AF-51_(NR_109380.1)			Xylella_fastidiosa_strain_PCE-FF_(NR_041779.1)	2	22		H	0	150	100	+	0	0	26I150M116I	RL|S1|R7390016/1	RL|S1|C274#0		RL|S1|C14115#0	188
H	2359	292	99.3	+	0	0	509I292M730I	RL|S1|C9368#0	Hydrotalea_sandarakina_strain_AF-51_(NR_109380.1)	10						H	0	150	100	+	0	0	27I150M115I	RL|S1|R13936044/1	RL|S1|C274#0		RL|S1|C899#0	685
H	2359	292	100	+	0	0	509I292M730I	RL|S1|C9525#0	Hydrotalea_sandarakina_strain_AF-51_(NR_109380.1)	163						H	0	150	100	+	0	0	30D120M172I	RL|S1|R11868770/1	RL|S1|C274#0		RL|S1|C15554#0	47
H	2359	292	98.6	+	0	0	509I292M730I	RL|S1|C11782#0	Hydrotalea_sandarakina_strain_AF-51_(NR_109380.1)	20						H	0	150	100	+	0	0	37D113M179I	RL|S1|R19995930/1	RL|S1|C274#0		RL|S1|C16295#0	199
H	2359	292	100	+	0	0	509I292M730I	RL|S1|C15855#0	Hydrotalea_sandarakina_strain_AF-51_(NR_109380.1)							H	0	150	100	+	0	0	37D113M179I	RL|S1|R4429907/1	RL|S1|C274#0		RL|S1|C16600#0	5
H	2359	292	99	+	0	0	509I292M730I	RL|S1|C16295#0	Hydrotalea_sandarakina_strain_AF-51_(NR_109380.1)	199						H	0	150	100	+	0	0	43I150M99I	RL|S1|R34965623/1	RL|S1|C274#0		RL|S1|C17184#0	11
H	2359	292	99	+	0	0	509I292M730I	RL|S1|C17806#0	Hydrotalea_sandarakina_strain_AF-51_(NR_109380.1)							H	0	150	100	+	0	0	46I150M96I	RL|S1|R40911287/1	RL|S1|C274#0		RL|S1|C983#0	140
H	2359	292	100	+	0	0	509I292M730I	RL|S1|C18954#0	Hydrotalea_sandarakina_strain_AF-51_(NR_109380.1)							H	0	150	100	+	0	0	51D99M193I	RL|S1|R48270481/1	RL|S1|C274#0		RL|S1|C1061#0	199
H	2359	292	96.9	+	0	0	509I292M730I	RL|S1|C19147#0	Hydrotalea_sandarakina_strain_AF-51_(NR_109380.1)							H	0	150	100	+	0	0	59D91M201I	RL|S1|R31224244/1	RL|S1|C274#0		RL|S1|C1410#0	44
H	7053	292	100	+	0	0	498I292M693I	RL|S1|C11517#0	Lampropedia_hyalina_strain_IAM_14890_(NR_040942.1)	20						H	0	150	100	+	0	0	5D145M147I	RL|S1|R46518420/1	RL|S1|C274#0		RL|S1|C3649#0	626
H	7288	292	100	+	0	0	455I292M668I	RL|S1|C4033#0	Lysobacter_oryzae_strain_YC6269_(NR_044484.1)	54						H	0	150	100	+	0	0	63D87M205I	RL|S1|R1262038/1	RL|S1|C274#0		RL|S1|C4033#0	54
H	7288	292	100	+	0	0	455I292M668I	RL|S1|C11048#0	Lysobacter_oryzae_strain_YC6269_(NR_044484.1)							H	0	150	100	+	0	0	65D85M207I	RL|S1|R49436098/1	RL|S1|C274#0
H	7288	292	100	+	0	0	455I292M668I	RL|S1|C17251#0	Lysobacter_oryzae_strain_YC6269_(NR_044484.1)							H	0	150	100	+	0	0	71D79M213I	RL|S1|R48752181/1	RL|S1|C274#0
H	7288	292	100	+	0	0	455I292M668I	RL|S1|C18841#0	Lysobacter_oryzae_strain_YC6269_(NR_044484.1)							H	0	150	100	+	0	0	74D76M216I	RL|S1|R26745494/1	RL|S1|C274#0
H	13206	292	99.7	+	0	0	499I292M699I	RL|S1|C4952#0	Massilia_namucuonensis_strain_333-1-0411_(NR_118215.1)	344						H	0	150	100	+	0	0	75D75M217I	RL|S1|R45089527/1	RL|S1|C274#0
H	3340	292	100	+	0	0	501I292M721I	RL|S1|C610#0	Nonlabens_dokdonensis_(NR_102491.1)	6						H	0	150	100	+	0	0	7D143M149I	RL|S1|R48537747/2	RL|S1|C274#0
H	10349	292	100	+	0	0	420I292M683I	RL|S1|C7679#0	Paracoccus_denitrificans_strain_381_(NR_026456.1)	178						H	0	150	100	+	0	0	80I150M62I	RL|S1|R3324665/1	RL|S1|C274#0
H	10349	292	100	+	0	0	420I292M683I	RL|S1|C8891#0	Paracoccus_denitrificans_strain_381_(NR_026456.1)							H	0	150	100	+	0	0	83I150M59I	RL|S1|R23542274/1	RL|S1|C274#0
H	10349	292	100	+	0	0	420I292M683I	RL|S1|C15246#0	Paracoccus_denitrificans_strain_381_(NR_026456.1)							H	0	150	100	-	0	0	10D140M152I	RL|S1|R17733704/1	RL|S1|C274#0
H	13694	292	100	+	0	0	499I292M736I	RL|S1|C8248#0	Pseudomonas_aeruginosa_strain_DSM_50071_(NR_117678.1)	390						H	0	150	100	-	0	0	115I150M27I	RL|S1|R14785637/2	RL|S1|C274#0
H	8319	291	100	+	0	0	500I291M698I	RL|S1|C11515#0	Schwartzia_succinivorans_strain_S1-1_(NR_029325.1)	1520						H	0	150	100	-	0	0	12D138M154I	RL|S1|R41633254/2	RL|S1|C274#0
H	8541	291	99.3	+	0	0	412I174MI37MI80M675I	RL|S1|C12495#0	Tepidibacter_formicigenes_strain_DV1184_(NR_029081.1)	41						H	0	150	100	-	0	0	130I150M12I	RL|S1|R20428843/1	RL|S1|C274#0
H	7113	292	100	+	0	0	487I292M706I	RL|S1|C3649#0	Tetrasphaera_duodecadis_strain_IAM_14868_(NR_040880.1)	626						H	0	150	100	-	0	0	139I150M3I	RL|S1|R9688241/1	RL|S1|C274#0
H	2668	292	100	+	0	0	423I292M657I	RL|S1|C15554#0	Williamsia_phyllosphaerae_strain_C7_(NR_108495.1)	47						H	0	150	100	-	0	0	170I122M28D	RL|S1|R38096869/1	RL|S1|C274#0
H	6235	292	100	+	0	0	507I292M738I	RL|S1|C1410#0	Xylella_fastidiosa_strain_PCE-FF_(NR_041779.1)	44						H	0	150	100	-	0	0	172I120M30D	RL|S1|R17584046/1	RL|S1|C274#0
H	6235	292	100	+	0	0	507I292M738I	RL|S1|C17681#0	Xylella_fastidiosa_strain_PCE-FF_(NR_041779.1)							H	0	150	100	-	0	0	183I109M41D	RL|S1|R23648416/1	RL|S1|C274#0
																H	0	150	100	-	0	0	209I83M67D	RL|S1|R8725576/1	RL|S1|C274#0
																H	0	150	100	-	0	0	215I77M73D	RL|S1|R26215436/1	RL|S1|C274#0
																H	0	150	100	-	0	0	216I76M74D	RL|S1|R6460176/1	RL|S1|C274#0
																H	0	150	100	-	0	0	25D125M167I	RL|S1|R14796996/1	RL|S1|C274#0
																H	0	150	100	-	0	0	27D123M169I	RL|S1|R14859324/1	RL|S1|C274#0
																H	0	150	100	-	0	0	28D122M170I	RL|S1|R25419103/2	RL|S1|C274#0
																H	0	150	100	-	0	0	29D121M171I	RL|S1|R4994346/1	RL|S1|C274#0
																H	0	150	100	-	0	0	32D118M174I	RL|S1|R15565308/1	RL|S1|C274#0
																H	0	150	100	-	0	0	37D113M179I	RL|S1|R8844954/1	RL|S1|C274#0
																H	0	150	100	-	0	0	38D112M180I	RL|S1|R42622207/2	RL|S1|C274#0
																H	0	150	100	-	0	0	39D111M181I	RL|S1|R17504310/1	RL|S1|C274#0
																H	0	150	100	-	0	0	40D110M182I	RL|S1|R15756581/1	RL|S1|C274#0
																H	0	150	100	-	0	0	42D108M184I	RL|S1|R29226121/1	RL|S1|C274#0
																H	0	150	100	-	0	0	42D108M184I	RL|S1|R40586155/1	RL|S1|C274#0
																H	0	150	100	-	0	0	43D107M185I	RL|S1|R3234786/1	RL|S1|C274#0
																H	0	150	100	-	0	0	43D107M185I	RL|S1|R5181963/1	RL|S1|C274#0
																H	0	150	100	-	0	0	44D106M186I	RL|S1|R47668499/1	RL|S1|C274#0
																H	0	150	100	-	0	0	45D105M187I	RL|S1|R8054271/1	RL|S1|C274#0
																H	0	150	100	-	0	0	4D146M146I	RL|S1|R5867724/1	RL|S1|C274#0
																H	0	150	100	-	0	0	52D98M194I	RL|S1|R12164550/2	RL|S1|C274#0
																H	0	150	100	-	0	0	53D97M195I	RL|S1|R29746031/1	RL|S1|C274#0
																H	0	150	100	-	0	0	53D97M195I	RL|S1|R4481896/1	RL|S1|C274#0
																H	0	150	100	-	0	0	59D91M201I	RL|S1|R3109838/2	RL|S1|C274#0
																H	0	150	100	-	0	0	60D90M202I	RL|S1|R12807739/1	RL|S1|C274#0
																H	0	150	100	-	0	0	63D87M205I	RL|S1|R22147078/2	RL|S1|C274#0
																H	0	150	100	-	0	0	64D86M206I	RL|S1|R28876759/1	RL|S1|C274#0
																H	0	150	100	-	0	0	65D85M207I	RL|S1|R2010120/2	RL|S1|C274#0
																H	0	150	100	-	0	0	66D84M208I	RL|S1|R33440451/1	RL|S1|C274#0
																H	0	150	100	-	0	0	66D84M208I	RL|S1|R41030901/1	RL|S1|C274#0
																H	0	150	100	-	0	0	66D84M208I	RL|S1|R5376585/1	RL|S1|C274#0
																H	0	150	100	-	0	0	67D83M209I	RL|S1|R20679860/2	RL|S1|C274#0
																H	0	150	100	-	0	0	68D82M210I	RL|S1|R39780879/1	RL|S1|C274#0
																H	0	150	100	-	0	0	69D81M211I	RL|S1|R17254909/1	RL|S1|C274#0
																H	0	150	100	-	0	0	69I150M73I	RL|S1|R30772668/1	RL|S1|C274#0
																H	0	150	100	-	0	0	6D144M148I	RL|S1|R25292055/1	RL|S1|C274#0
																H	0	150	100	-	0	0	70D80M212I	RL|S1|R42302224/2	RL|S1|C274#0
																H	0	150	100	-	0	0	71D79M213I	RL|S1|R12044128/1	RL|S1|C274#0
																H	0	150	100	-	0	0	72D78M214I	RL|S1|R48971166/1	RL|S1|C274#0
																H	0	150	100	-	0	0	74D76M216I	RL|S1|R325519/1	RL|S1|C274#0
																H	0	150	100	-	0	0	87I150M55I	RL|S1|R44901343/1	RL|S1|C274#0
																H	0	150	97	+	0	0	15D135M157I	RL|S1|R32770028/1	RL|S1|C274#0
																H	0	150	97	+	0	0	49D101M191I	RL|S1|R48030540/2	RL|S1|C274#0
																H	0	150	97	+	0	0	49D101M191I	RL|S1|R49303432/2	RL|S1|C274#0
																H	0	150	97	-	0	0	157I135M15D	RL|S1|R16790841/2	RL|S1|C274#0
																H	0	150	97	-	0	0	157I135M15D	RL|S1|R26620530/1	RL|S1|C274#0
																H	0	150	97	-	0	0	158I134M16D	RL|S1|R49451294/1	RL|S1|C274#0
																H	0	150	97	-	0	0	192I100M50D	RL|S1|R6406934/1	RL|S1|C274#0
																H	0	150	97.1	+	0	0	45D105M187I	RL|S1|R26516700/2	RL|S1|C274#0
																H	0	150	97.1	-	0	0	10D140M152I	RL|S1|R15128710/2	RL|S1|C274#0
																H	0	150	97.1	-	0	0	11D139M153I	RL|S1|R17102926/1	RL|S1|C274#0
																H	0	150	97.1	-	0	0	13D137M155I	RL|S1|R19588669/1	RL|S1|C274#0
																H	0	150	97.1	-	0	0	154I138M12D	RL|S1|R5330105/2	RL|S1|C274#0
																H	0	150	97.1	-	0	0	45D105M187I	RL|S1|R31683352/2	RL|S1|C274#0
																H	0	150	97.2	+	0	0	183I109M41D	RL|S1|R49252502/2	RL|S1|C274#0
																H	0	150	97.2	+	0	0	43D107M185I	RL|S1|R11541678/2	RL|S1|C274#0
																H	0	150	97.2	+	0	0	44D106M186I	RL|S1|R10654951/1	RL|S1|C274#0
																H	0	150	97.2	+	0	0	5D145M147I	RL|S1|R1684246/2	RL|S1|C274#0
																H	0	150	97.2	+	0	0	9D141M151I	RL|S1|R39375717/1	RL|S1|C274#0
																H	0	150	97.2	-	0	0	185I107M43D	RL|S1|R5710176/2	RL|S1|C274#0
																H	0	150	97.2	-	0	0	43D107M185I	RL|S1|R48034462/2	RL|S1|C274#0
																H	0	150	97.2	-	0	0	43D107M185I	RL|S1|R9919981/2	RL|S1|C274#0
																H	0	150	97.2	-	0	0	44D106M186I	RL|S1|R7548320/2	RL|S1|C274#0
																H	0	150	97.3	+	0	0	103I150M39I	RL|S1|R36373935/2	RL|S1|C274#0
																H	0	150	97.3	+	0	0	109I150M33I	RL|S1|R19847763/1	RL|S1|C274#0
																H	0	150	97.3	+	0	0	121I150M21I	RL|S1|R26628731/2	RL|S1|C274#0
																H	0	150	97.3	+	0	0	123I150M19I	RL|S1|R9888369/2	RL|S1|C274#0
																H	0	150	97.3	+	0	0	137I150M5I	RL|S1|R15036108/2	RL|S1|C274#0
																H	0	150	97.3	+	0	0	139I150M3I	RL|S1|R19607798/1	RL|S1|C274#0
																H	0	150	97.3	+	0	0	139I150M3I	RL|S1|R33288667/1	RL|S1|C274#0
																H	0	150	97.3	+	0	0	13I150M129I	RL|S1|R11331279/1	RL|S1|C274#0
																H	0	150	97.3	+	0	0	13I150M129I	RL|S1|R26620530/2	RL|S1|C274#0
																H	0	150	97.3	+	0	0	142I150M	RL|S1|R1714796/1	RL|S1|C274#0
																H	0	150	97.3	+	0	0	142I150M	RL|S1|R32127604/1	RL|S1|C274#0
																H	0	150	97.3	+	0	0	14I150M128I	RL|S1|R46338055/1	RL|S1|C274#0
																H	0	150	97.3	+	0	0	15I150M127I	RL|S1|R14301181/2	RL|S1|C274#0
																H	0	150	97.3	+	0	0	17I150M125I	RL|S1|R45384221/2	RL|S1|C274#0
																H	0	150	97.3	+	0	0	20I150M122I	RL|S1|R8967337/2	RL|S1|C274#0
																H	0	150	97.3	+	0	0	26I150M116I	RL|S1|R20428843/2	RL|S1|C274#0
																H	0	150	97.3	+	0	0	29I150M113I	RL|S1|R36293252/2	RL|S1|C274#0
																H	0	150	97.3	+	0	0	2D148M144I	RL|S1|R41204622/2	RL|S1|C274#0
																H	0	150	97.3	+	0	0	2I150M140I	RL|S1|R25993866/2	RL|S1|C274#0
																H	0	150	97.3	+	0	0	2I150M140I	RL|S1|R6146921/1	RL|S1|C274#0
																H	0	150	97.3	+	0	0	30I150M112I	RL|S1|R36379262/1	RL|S1|C274#0
																H	0	150	97.3	+	0	0	32I150M110I	RL|S1|R21691436/2	RL|S1|C274#0
																H	0	150	97.3	+	0	0	39D111M181I	RL|S1|R21675170/1	RL|S1|C274#0
																H	0	150	97.3	+	0	0	39D111M181I	RL|S1|R48119044/2	RL|S1|C274#0
																H	0	150	97.3	+	0	0	39D111M181I	RL|S1|R7511984/1	RL|S1|C274#0
																H	0	150	97.3	+	0	0	3D147M145I	RL|S1|R20958187/2	RL|S1|C274#0
																H	0	150	97.3	+	0	0	3I150M139I	RL|S1|R44644375/2	RL|S1|C274#0
																H	0	150	97.3	+	0	0	45I150M97I	RL|S1|R38820011/2	RL|S1|C274#0
																H	0	150	97.3	+	0	0	49I150M93I	RL|S1|R3070680/2	RL|S1|C274#0
																H	0	150	97.3	+	0	0	54I150M88I	RL|S1|R44424791/2	RL|S1|C274#0
																H	0	150	97.3	+	0	0	57I150M85I	RL|S1|R25908792/2	RL|S1|C274#0
																H	0	150	97.3	+	0	0	58I150M84I	RL|S1|R26069130/1	RL|S1|C274#0
																H	0	150	97.3	+	0	0	60I150M82I	RL|S1|R28965383/2	RL|S1|C274#0
																H	0	150	97.3	+	0	0	63I150M79I	RL|S1|R4869225/2	RL|S1|C274#0
																H	0	150	97.3	+	0	0	76I150M66I	RL|S1|R35138076/2	RL|S1|C274#0
																H	0	150	97.3	+	0	0	90I150M52I	RL|S1|R15873572/2	RL|S1|C274#0
																H	0	150	97.3	-	0	0	105I150M37I	RL|S1|R12077209/1	RL|S1|C274#0
																H	0	150	97.3	-	0	0	106I150M36I	RL|S1|R31690366/2	RL|S1|C274#0
																H	0	150	97.3	-	0	0	106I150M36I	RL|S1|R8989024/1	RL|S1|C274#0
																H	0	150	97.3	-	0	0	12I150M130I	RL|S1|R4452255/1	RL|S1|C274#0
																H	0	150	97.3	-	0	0	13I150M129I	RL|S1|R15130283/1	RL|S1|C274#0
																H	0	150	97.3	-	0	0	13I150M129I	RL|S1|R7753734/2	RL|S1|C274#0
																H	0	150	97.3	-	0	0	146I146M4D	RL|S1|R42933536/2	RL|S1|C274#0
																H	0	150	97.3	-	0	0	179I113M37D	RL|S1|R27179351/1	RL|S1|C274#0
																H	0	150	97.3	-	0	0	179I113M37D	RL|S1|R44186953/1	RL|S1|C274#0
																H	0	150	97.3	-	0	0	28I150M114I	RL|S1|R30853226/2	RL|S1|C274#0
																H	0	150	97.3	-	0	0	30I150M112I	RL|S1|R21596251/2	RL|S1|C274#0
																H	0	150	97.3	-	0	0	34I150M108I	RL|S1|R22330576/2	RL|S1|C274#0
																H	0	150	97.3	-	0	0	37I150M105I	RL|S1|R23082627/1	RL|S1|C274#0
																H	0	150	97.3	-	0	0	38D112M180I	RL|S1|R1163856/2	RL|S1|C274#0
																H	0	150	97.3	-	0	0	40D110M182I	RL|S1|R12556038/2	RL|S1|C274#0
																H	0	150	97.3	-	0	0	53I150M89I	RL|S1|R5831432/2	RL|S1|C274#0
																H	0	150	97.3	-	0	0	54I150M88I	RL|S1|R42573898/2	RL|S1|C274#0
																H	0	150	97.3	-	0	0	82I150M60I	RL|S1|R20014290/1	RL|S1|C274#0
																H	0	150	97.3	-	0	0	93I150M49I	RL|S1|R15434604/2	RL|S1|C274#0
																H	0	150	97.3	-	0	0	99I150M43I	RL|S1|R6413395/2	RL|S1|C274#0
																H	0	150	97.3	-	0	0	I150M141I	RL|S1|R17730930/1	RL|S1|C274#0
																H	0	150	97.4	+	0	0	175I117M33D	RL|S1|R7895843/2	RL|S1|C274#0
																H	0	150	97.4	+	0	0	178I114M36D	RL|S1|R6686087/1	RL|S1|C274#0
																H	0	150	97.4	+	0	0	214I78M72D	RL|S1|R9204535/2	RL|S1|C274#0
																H	0	150	97.4	+	0	0	215I77M73D	RL|S1|R18206239/2	RL|S1|C274#0
																H	0	150	97.4	+	0	0	216I76M74D	RL|S1|R3390700/1	RL|S1|C274#0
																H	0	150	97.4	+	0	0	34D116M176I	RL|S1|R38988821/2	RL|S1|C274#0
																H	0	150	97.4	+	0	0	35D115M177I	RL|S1|R24418767/2	RL|S1|C274#0
																H	0	150	97.4	+	0	0	72D78M214I	RL|S1|R17656314/1	RL|S1|C274#0
																H	0	150	97.4	-	0	0	214I78M72D	RL|S1|R21750349/2	RL|S1|C274#0
																H	0	150	97.4	-	0	0	33D117M175I	RL|S1|R23691485/2	RL|S1|C274#0
																H	0	150	97.4	-	0	0	36D114M178I	RL|S1|R45851466/2	RL|S1|C274#0
																H	0	150	97.4	-	0	0	73D77M215I	RL|S1|R43553019/2	RL|S1|C274#0
																H	0	150	97.4	-	0	0	74D76M216I	RL|S1|R43912801/2	RL|S1|C274#0
																H	0	150	97.5	+	0	0	172I120M30D	RL|S1|R20430240/1	RL|S1|C274#0
																H	0	150	97.5	+	0	0	212I80M70D	RL|S1|R43035000/2	RL|S1|C274#0
																H	0	150	97.5	+	0	0	213I79M71D	RL|S1|R37401596/2	RL|S1|C274#0
																H	0	150	97.5	+	0	0	29D121M171I	RL|S1|R1051334/1	RL|S1|C274#0
																H	0	150	97.5	+	0	0	30D120M172I	RL|S1|R23526650/1	RL|S1|C274#0
																H	0	150	97.5	+	0	0	31D119M173I	RL|S1|R17420201/2	RL|S1|C274#0
																H	0	150	97.5	+	0	0	31D119M173I	RL|S1|R21069116/2	RL|S1|C274#0
																H	0	150	97.5	+	0	0	32D118M174I	RL|S1|R12680278/1	RL|S1|C274#0
																H	0	150	97.5	+	0	0	32D118M174I	RL|S1|R37851296/2	RL|S1|C274#0
																H	0	150	97.5	-	0	0	173I119M31D	RL|S1|R15614556/2	RL|S1|C274#0
																H	0	150	97.5	-	0	0	174I118M32D	RL|S1|R28965383/1	RL|S1|C274#0
																H	0	150	97.5	-	0	0	29D121M171I	RL|S1|R8458313/2	RL|S1|C274#0
																H	0	150	97.5	-	0	0	31D119M173I	RL|S1|R18166871/2	RL|S1|C274#0
																H	0	150	97.5	-	0	0	31D119M173I	RL|S1|R9496954/2	RL|S1|C274#0
																H	0	150	97.5	-	0	0	32D118M174I	RL|S1|R25677177/2	RL|S1|C274#0
																H	0	150	97.5	-	0	0	71D79M213I	RL|S1|R12097866/1	RL|S1|C274#0
																H	0	150	97.6	+	0	0	208I84M66D	RL|S1|R37090676/2	RL|S1|C274#0
																H	0	150	97.6	+	0	0	208I84M66D	RL|S1|R39859064/2	RL|S1|C274#0
																H	0	150	97.6	+	0	0	208I84M66D	RL|S1|R44184855/1	RL|S1|C274#0
																H	0	150	97.6	+	0	0	209I83M67D	RL|S1|R13193998/2	RL|S1|C274#0
																H	0	150	97.6	+	0	0	209I83M67D	RL|S1|R49440432/2	RL|S1|C274#0
																H	0	150	97.6	+	0	0	210I82M68D	RL|S1|R15665079/2	RL|S1|C274#0
																H	0	150	97.6	+	0	0	23D127M165I	RL|S1|R14785637/1	RL|S1|C274#0
																H	0	150	97.6	+	0	0	23D127M165I	RL|S1|R45662361/1	RL|S1|C274#0
																H	0	150	97.6	+	0	0	26D124M168I	RL|S1|R15768508/1	RL|S1|C274#0
																H	0	150	97.6	+	0	0	27D123M169I	RL|S1|R40093316/1	RL|S1|C274#0
																H	0	150	97.6	+	0	0	66D84M208I	RL|S1|R31067894/1	RL|S1|C274#0
																H	0	150	97.6	+	0	0	66D84M208I	RL|S1|R6232376/1	RL|S1|C274#0
																H	0	150	97.6	-	0	0	167I125M25D	RL|S1|R29189916/2	RL|S1|C274#0
																H	0	150	97.6	-	0	0	24D126M166I	RL|S1|R7530723/2	RL|S1|C274#0
																H	0	150	97.6	-	0	0	25D125M167I	RL|S1|R12699515/2	RL|S1|C274#0
																H	0	150	97.6	-	0	0	26D124M168I	RL|S1|R3485877/2	RL|S1|C274#0
																H	0	150	97.6	-	0	0	65D85M207I	RL|S1|R46762572/2	RL|S1|C274#0
																H	0	150	97.7	+	0	0	17D133M159I	RL|S1|R30305444/1	RL|S1|C274#0
																H	0	150	97.7	+	0	0	204I88M62D	RL|S1|R44249978/2	RL|S1|C274#0
																H	0	150	97.7	+	0	0	205I87M63D	RL|S1|R31635823/2	RL|S1|C274#0
																H	0	150	97.7	+	0	0	205I87M63D	RL|S1|R35907503/2	RL|S1|C274#0
																H	0	150	97.7	+	0	0	205I87M63D	RL|S1|R42432144/1	RL|S1|C274#0
																H	0	150	97.7	+	0	0	205I87M63D	RL|S1|R678624/1	RL|S1|C274#0
																H	0	150	97.7	+	0	0	21D129M163I	RL|S1|R41190918/2	RL|S1|C274#0
																H	0	150	97.7	+	0	0	62D88M204I	RL|S1|R37007036/1	RL|S1|C274#0
																H	0	150	97.7	+	0	0	63D87M205I	RL|S1|R48853281/1	RL|S1|C274#0
																H	0	150	97.7	-	0	0	162I130M20D	RL|S1|R41081633/2	RL|S1|C274#0
																H	0	150	97.7	-	0	0	18D132M160I	RL|S1|R7257976/2	RL|S1|C274#0
																H	0	150	97.7	-	0	0	19D131M161I	RL|S1|R19724656/1	RL|S1|C274#0
																H	0	150	97.7	-	0	0	19D131M161I	RL|S1|R40724426/2	RL|S1|C274#0
																H	0	150	97.7	-	0	0	205I87M63D	RL|S1|R24181160/1	RL|S1|C274#0
																H	0	150	97.7	-	0	0	205I87M63D	RL|S1|R32608943/1	RL|S1|C274#0
																H	0	150	97.7	-	0	0	22D128M164I	RL|S1|R28344125/2	RL|S1|C274#0
																H	0	150	97.7	-	0	0	63D87M205I	RL|S1|R31975358/2	RL|S1|C274#0
																H	0	150	97.8	+	0	0	11D139M153I	RL|S1|R6413395/1	RL|S1|C274#0
																H	0	150	97.8	+	0	0	199I93M57D	RL|S1|R35700564/1	RL|S1|C274#0
																H	0	150	97.8	+	0	0	200I92M58D	RL|S1|R45293867/2	RL|S1|C274#0
																H	0	150	97.8	+	0	0	203I89M61D	RL|S1|R10302195/2	RL|S1|C274#0
																H	0	150	97.8	+	0	0	57D93M199I	RL|S1|R41605738/1	RL|S1|C274#0
																H	0	150	97.8	+	0	0	57D93M199I	RL|S1|R46119782/1	RL|S1|C274#0
																H	0	150	97.8	+	0	0	59D91M201I	RL|S1|R4009074/2	RL|S1|C274#0
																H	0	150	97.8	+	0	0	60D90M202I	RL|S1|R36918287/2	RL|S1|C274#0
																H	0	150	97.8	+	0	0	61D89M203I	RL|S1|R28333510/1	RL|S1|C274#0
																H	0	150	97.8	-	0	0	11D139M153I	RL|S1|R32940137/1	RL|S1|C274#0
																H	0	150	97.8	-	0	0	14D136M156I	RL|S1|R2907549/1	RL|S1|C274#0
																H	0	150	97.8	-	0	0	153I139M11D	RL|S1|R23745687/2	RL|S1|C274#0
																H	0	150	97.8	-	0	0	156I136M14D	RL|S1|R17261964/2	RL|S1|C274#0
																H	0	150	97.8	-	0	0	15D135M157I	RL|S1|R16453258/2	RL|S1|C274#0
																H	0	150	97.8	-	0	0	15D135M157I	RL|S1|R28091571/1	RL|S1|C274#0
																H	0	150	97.8	-	0	0	15D135M157I	RL|S1|R34354499/2	RL|S1|C274#0
																H	0	150	97.8	-	0	0	16D134M158I	RL|S1|R34075014/1	RL|S1|C274#0
																H	0	150	97.8	-	0	0	199I93M57D	RL|S1|R41316064/1	RL|S1|C274#0
																H	0	150	97.8	-	0	0	57D93M199I	RL|S1|R10975148/2	RL|S1|C274#0
																H	0	150	97.8	-	0	0	58D92M200I	RL|S1|R48291667/2	RL|S1|C274#0
																H	0	150	97.8	-	0	0	60D90M202I	RL|S1|R17453890/1	RL|S1|C274#0
																H	0	150	97.9	+	0	0	150I142M8D	RL|S1|R38341594/1	RL|S1|C274#0
																H	0	150	97.9	+	0	0	8D142M150I	RL|S1|R1232198/1	RL|S1|C274#0
																H	0	150	97.9	+	0	0	8D142M150I	RL|S1|R32982022/1	RL|S1|C274#0
																H	0	150	97.9	-	0	0	146I146M4D	RL|S1|R34965623/2	RL|S1|C274#0
																H	0	150	97.9	-	0	0	148I144M6D	RL|S1|R42822819/1	RL|S1|C274#0
																H	0	150	97.9	-	0	0	56D94M198I	RL|S1|R29017160/2	RL|S1|C274#0
																H	0	150	97.9	-	0	0	56D94M198I	RL|S1|R36168935/2	RL|S1|C274#0
																H	0	150	97.9	-	0	0	56D94M198I	RL|S1|R44652512/2	RL|S1|C274#0
																H	0	150	97.9	-	0	0	8D142M150I	RL|S1|R41130600/1	RL|S1|C274#0
																H	0	150	98	+	0	0	105I150M37I	RL|S1|R49455960/1	RL|S1|C274#0
																H	0	150	98	+	0	0	116I150M26I	RL|S1|R46473255/1	RL|S1|C274#0
																H	0	150	98	+	0	0	11I150M131I	RL|S1|R5933183/1	RL|S1|C274#0
																H	0	150	98	+	0	0	127I150M15I	RL|S1|R21961338/1	RL|S1|C274#0
																H	0	150	98	+	0	0	12I150M130I	RL|S1|R6564034/1	RL|S1|C274#0
																H	0	150	98	+	0	0	130I150M12I	RL|S1|R11808572/1	RL|S1|C274#0
																H	0	150	98	+	0	0	14I150M128I	RL|S1|R23989957/1	RL|S1|C274#0
																H	0	150	98	+	0	0	150M142I	RL|S1|R39611173/1	RL|S1|C274#0
																H	0	150	98	+	0	0	192I100M50D	RL|S1|R38517773/2	RL|S1|C274#0
																H	0	150	98	+	0	0	22I150M120I	RL|S1|R42822819/2	RL|S1|C274#0
																H	0	150	98	+	0	0	2D148M144I	RL|S1|R35348459/1	RL|S1|C274#0
																H	0	150	98	+	0	0	2D148M144I	RL|S1|R42170930/2	RL|S1|C274#0
																H	0	150	98	+	0	0	42I150M100I	RL|S1|R17332684/2	RL|S1|C274#0
																H	0	150	98	+	0	0	44I150M98I	RL|S1|R24340741/2	RL|S1|C274#0
																H	0	150	98	+	0	0	50D100M192I	RL|S1|R17975301/1	RL|S1|C274#0
																H	0	150	98	+	0	0	50D100M192I	RL|S1|R25877519/1	RL|S1|C274#0
																H	0	150	98	+	0	0	52I150M90I	RL|S1|R17584046/2	RL|S1|C274#0
																H	0	150	98	+	0	0	59I150M83I	RL|S1|R5330105/1	RL|S1|C274#0
																H	0	150	98	+	0	0	68I150M74I	RL|S1|R42933536/1	RL|S1|C274#0
																H	0	150	98	+	0	0	6I150M136I	RL|S1|R5211244/1	RL|S1|C274#0
																H	0	150	98	+	0	0	70I150M72I	RL|S1|R6569235/1	RL|S1|C274#0
																H	0	150	98	+	0	0	71I150M71I	RL|S1|R10500335/1	RL|S1|C274#0
																H	0	150	98	+	0	0	72I150M70I	RL|S1|R31290164/1	RL|S1|C274#0
																H	0	150	98	+	0	0	75I150M67I	RL|S1|R186533/1	RL|S1|C274#0
																H	0	150	98	+	0	0	83I150M59I	RL|S1|R10605635/2	RL|S1|C274#0
																H	0	150	98	+	0	0	85I150M57I	RL|S1|R44186953/2	RL|S1|C274#0
																H	0	150	98	+	0	0	95I150M47I	RL|S1|R44645135/1	RL|S1|C274#0
																H	0	150	98	+	0	0	97I150M45I	RL|S1|R41995304/1	RL|S1|C274#0
																H	0	150	98	+	0	0	99I150M43I	RL|S1|R16872658/2	RL|S1|C274#0
																H	0	150	98	+	0	0	9I150M133I	RL|S1|R9688241/2	RL|S1|C274#0
																H	0	150	98	-	0	0	103I150M39I	RL|S1|R46338055/2	RL|S1|C274#0
																H	0	150	98	-	0	0	108I150M34I	RL|S1|R19477110/2	RL|S1|C274#0
																H	0	150	98	-	0	0	116I150M26I	RL|S1|R29861043/2	RL|S1|C274#0
																H	0	150	98	-	0	0	122I150M20I	RL|S1|R36874420/1	RL|S1|C274#0
																H	0	150	98	-	0	0	123I150M19I	RL|S1|R12789123/2	RL|S1|C274#0
																H	0	150	98	-	0	0	129I150M13I	RL|S1|R21359286/2	RL|S1|C274#0
																H	0	150	98	-	0	0	133I150M9I	RL|S1|R38820011/1	RL|S1|C274#0
																H	0	150	98	-	0	0	13I150M129I	RL|S1|R16031792/2	RL|S1|C274#0
																H	0	150	98	-	0	0	16I150M126I	RL|S1|R12532096/1	RL|S1|C274#0
																H	0	150	98	-	0	0	16I150M126I	RL|S1|R28929413/1	RL|S1|C274#0
																H	0	150	98	-	0	0	17I150M125I	RL|S1|R12011703/1	RL|S1|C274#0
																H	0	150	98	-	0	0	18I150M124I	RL|S1|R15685089/1	RL|S1|C274#0
																H	0	150	98	-	0	0	191I101M49D	RL|S1|R39997318/1	RL|S1|C274#0
																H	0	150	98	-	0	0	23I150M119I	RL|S1|R4248947/2	RL|S1|C274#0
																H	0	150	98	-	0	0	25I150M117I	RL|S1|R19860664/2	RL|S1|C274#0
																H	0	150	98	-	0	0	26I150M116I	RL|S1|R21125706/1	RL|S1|C274#0
																H	0	150	98	-	0	0	26I150M116I	RL|S1|R38298059/1	RL|S1|C274#0
																H	0	150	98	-	0	0	27I150M115I	RL|S1|R7575167/1	RL|S1|C274#0
																H	0	150	98	-	0	0	28I150M114I	RL|S1|R5627306/1	RL|S1|C274#0
																H	0	150	98	-	0	0	2I150M140I	RL|S1|R16742109/2	RL|S1|C274#0
																H	0	150	98	-	0	0	32I150M110I	RL|S1|R26781869/1	RL|S1|C274#0
																H	0	150	98	-	0	0	34I150M108I	RL|S1|R4835050/1	RL|S1|C274#0
																H	0	150	98	-	0	0	3I150M139I	RL|S1|R44523482/1	RL|S1|C274#0
																H	0	150	98	-	0	0	41I150M101I	RL|S1|R9202793/1	RL|S1|C274#0
																H	0	150	98	-	0	0	43I150M99I	RL|S1|R19341838/2	RL|S1|C274#0
																H	0	150	98	-	0	0	44I150M98I	RL|S1|R47053958/2	RL|S1|C274#0
																H	0	150	98	-	0	0	46I150M96I	RL|S1|R15692176/2	RL|S1|C274#0
																H	0	150	98	-	0	0	49D101M191I	RL|S1|R23764654/2	RL|S1|C274#0
																H	0	150	98	-	0	0	49I150M93I	RL|S1|R46671306/2	RL|S1|C274#0
																H	0	150	98	-	0	0	51I150M91I	RL|S1|R15953529/2	RL|S1|C274#0
																H	0	150	98	-	0	0	52D98M194I	RL|S1|R11678988/2	RL|S1|C274#0
																H	0	150	98	-	0	0	52D98M194I	RL|S1|R15514704/2	RL|S1|C274#0
																H	0	150	98	-	0	0	52D98M194I	RL|S1|R15600697/2	RL|S1|C274#0
																H	0	150	98	-	0	0	57I150M85I	RL|S1|R35351884/2	RL|S1|C274#0
																H	0	150	98	-	0	0	65I150M77I	RL|S1|R26745494/2	RL|S1|C274#0
																H	0	150	98	-	0	0	71I150M71I	RL|S1|R37192498/2	RL|S1|C274#0
																H	0	150	98	-	0	0	73I150M69I	RL|S1|R26228638/1	RL|S1|C274#0
																H	0	150	98	-	0	0	80I150M62I	RL|S1|R49303432/1	RL|S1|C274#0
																H	0	150	98	-	0	0	83I150M59I	RL|S1|R48119044/1	RL|S1|C274#0
																H	0	150	98	-	0	0	85I150M57I	RL|S1|R10237720/1	RL|S1|C274#0
																H	0	150	98	-	0	0	86I150M56I	RL|S1|R40015643/2	RL|S1|C274#0
																H	0	150	98	-	0	0	98I150M44I	RL|S1|R5211244/2	RL|S1|C274#0
																H	0	150	98.1	+	0	0	184I108M42D	RL|S1|R22126244/1	RL|S1|C274#0
																H	0	150	98.1	+	0	0	44D106M186I	RL|S1|R35113705/2	RL|S1|C274#0
																H	0	150	98.1	+	0	0	45D105M187I	RL|S1|R18949186/1	RL|S1|C274#0
																H	0	150	98.1	+	0	0	45D105M187I	RL|S1|R26440854/2	RL|S1|C274#0
																H	0	150	98.1	+	0	0	45D105M187I	RL|S1|R34713035/1	RL|S1|C274#0
																H	0	150	98.1	+	0	0	45D105M187I	RL|S1|R48761597/1	RL|S1|C274#0
																H	0	150	98.1	+	0	0	47D103M189I	RL|S1|R482526/1	RL|S1|C274#0
																H	0	150	98.1	-	0	0	188I104M46D	RL|S1|R15873572/1	RL|S1|C274#0
																H	0	150	98.1	-	0	0	188I104M46D	RL|S1|R43240791/2	RL|S1|C274#0
																H	0	150	98.1	-	0	0	43D107M185I	RL|S1|R47718131/1	RL|S1|C274#0
																H	0	150	98.1	-	0	0	45D105M187I	RL|S1|R20078631/2	RL|S1|C274#0
																H	0	150	98.1	-	0	0	45D105M187I	RL|S1|R44954680/1	RL|S1|C274#0
																H	0	150	98.1	-	0	0	46D104M188I	RL|S1|R38825764/1	RL|S1|C274#0
																H	0	150	98.1	-	0	0	47D103M189I	RL|S1|R28126113/2	RL|S1|C274#0
																H	0	150	98.1	-	0	0	47D103M189I	RL|S1|R48207976/2	RL|S1|C274#0
																H	0	150	98.2	+	0	0	180I112M38D	RL|S1|R10685953/2	RL|S1|C274#0
																H	0	150	98.2	+	0	0	181I111M39D	RL|S1|R39084732/2	RL|S1|C274#0
																H	0	150	98.2	+	0	0	39D111M181I	RL|S1|R20722539/1	RL|S1|C274#0
																H	0	150	98.2	-	0	0	180I112M38D	RL|S1|R4094296/1	RL|S1|C274#0
																H	0	150	98.2	-	0	0	181I111M39D	RL|S1|R48870763/1	RL|S1|C274#0
																H	0	150	98.2	-	0	0	182I110M40D	RL|S1|R5233036/2	RL|S1|C274#0
																H	0	150	98.2	-	0	0	37D113M179I	RL|S1|R38418301/2	RL|S1|C274#0
																H	0	150	98.2	-	0	0	38D112M180I	RL|S1|R34717838/2	RL|S1|C274#0
																H	0	150	98.2	-	0	0	39D111M181I	RL|S1|R49277073/2	RL|S1|C274#0
																H	0	150	98.3	+	0	0	171I121M29D	RL|S1|R13360398/2	RL|S1|C274#0
																H	0	150	98.3	+	0	0	176I116M34D	RL|S1|R4086062/1	RL|S1|C274#0
																H	0	150	98.3	+	0	0	176I116M34D	RL|S1|R6460176/2	RL|S1|C274#0
																H	0	150	98.3	+	0	0	32D118M174I	RL|S1|R46962902/1	RL|S1|C274#0
																H	0	150	98.3	-	0	0	171I121M29D	RL|S1|R21016713/2	RL|S1|C274#0
																H	0	150	98.3	-	0	0	29D121M171I	RL|S1|R45977129/2	RL|S1|C274#0
																H	0	150	98.3	-	0	0	31D119M173I	RL|S1|R6321733/1	RL|S1|C274#0
																H	0	150	98.3	-	0	0	33D117M175I	RL|S1|R28235088/2	RL|S1|C274#0
																H	0	150	98.3	-	0	0	33D117M175I	RL|S1|R6123944/2	RL|S1|C274#0
																H	0	150	98.3	-	0	0	34D116M176I	RL|S1|R35533355/1	RL|S1|C274#0
																H	0	150	98.3	-	0	0	34D116M176I	RL|S1|R38833615/1	RL|S1|C274#0
																H	0	150	98.4	+	0	0	167I125M25D	RL|S1|R30214874/1	RL|S1|C274#0
																H	0	150	98.4	+	0	0	22D128M164I	RL|S1|R15434604/1	RL|S1|C274#0
																H	0	150	98.4	+	0	0	23D127M165I	RL|S1|R31047073/1	RL|S1|C274#0
																H	0	150	98.4	+	0	0	23D127M165I	RL|S1|R45996254/1	RL|S1|C274#0
																H	0	150	98.4	+	0	0	24D126M166I	RL|S1|R1651726/1	RL|S1|C274#0
																H	0	150	98.4	+	0	0	27D123M169I	RL|S1|R31506036/1	RL|S1|C274#0
																H	0	150	98.4	+	0	0	27D123M169I	RL|S1|R38966610/1	RL|S1|C274#0
																H	0	150	98.4	+	0	0	28D122M170I	RL|S1|R42064378/1	RL|S1|C274#0
																H	0	150	98.4	-	0	0	23D127M165I	RL|S1|R31346513/1	RL|S1|C274#0
																H	0	150	98.4	-	0	0	24D126M166I	RL|S1|R39282019/1	RL|S1|C274#0
																H	0	150	98.4	-	0	0	24D126M166I	RL|S1|R46198100/1	RL|S1|C274#0
																H	0	150	98.4	-	0	0	26D124M168I	RL|S1|R21394521/1	RL|S1|C274#0
																H	0	150	98.4	-	0	0	27D123M169I	RL|S1|R19116084/2	RL|S1|C274#0
																H	0	150	98.5	+	0	0	13D137M155I	RL|S1|R18766004/1	RL|S1|C274#0
																H	0	150	98.5	+	0	0	13D137M155I	RL|S1|R45797502/2	RL|S1|C274#0
																H	0	150	98.5	+	0	0	14D136M156I	RL|S1|R1850009/2	RL|S1|C274#0
																H	0	150	98.5	+	0	0	155I137M13D	RL|S1|R27659027/2	RL|S1|C274#0
																H	0	150	98.5	+	0	0	15D135M157I	RL|S1|R12789123/1	RL|S1|C274#0
																H	0	150	98.5	+	0	0	17D133M159I	RL|S1|R33091727/1	RL|S1|C274#0
																H	0	150	98.5	+	0	0	20D130M162I	RL|S1|R9276539/1	RL|S1|C274#0
																H	0	150	98.5	-	0	0	13D137M155I	RL|S1|R25480396/1	RL|S1|C274#0
																H	0	150	98.5	-	0	0	157I135M15D	RL|S1|R7151207/2	RL|S1|C274#0
																H	0	150	98.5	-	0	0	15D135M157I	RL|S1|R43077922/1	RL|S1|C274#0
																H	0	150	98.5	-	0	0	160I132M18D	RL|S1|R32982022/2	RL|S1|C274#0
																H	0	150	98.5	-	0	0	16D134M158I	RL|S1|R32352955/1	RL|S1|C274#0
																H	0	150	98.5	-	0	0	18D132M160I	RL|S1|R18728694/2	RL|S1|C274#0
																H	0	150	98.5	-	0	0	19D131M161I	RL|S1|R24543211/1	RL|S1|C274#0
																H	0	150	98.5	-	0	0	20D130M162I	RL|S1|R21212807/1	RL|S1|C274#0
																H	0	150	98.5	-	0	0	20D130M162I	RL|S1|R29809742/2	RL|S1|C274#0
																H	0	150	98.6	+	0	0	11D139M153I	RL|S1|R26856736/1	RL|S1|C274#0
																H	0	150	98.6	+	0	0	11D139M153I	RL|S1|R32176376/1	RL|S1|C274#0
																H	0	150	98.6	+	0	0	153I139M11D	RL|S1|R28824137/1	RL|S1|C274#0
																H	0	150	98.6	+	0	0	153I139M11D	RL|S1|R49071596/1	RL|S1|C274#0
																H	0	150	98.6	+	0	0	5D145M147I	RL|S1|R21359286/1	RL|S1|C274#0
																H	0	150	98.6	+	0	0	6D144M148I	RL|S1|R48870763/2	RL|S1|C274#0
																H	0	150	98.6	+	0	0	7D143M149I	RL|S1|R38224049/1	RL|S1|C274#0
																H	0	150	98.6	+	0	0	7D143M149I	RL|S1|R39204109/1	RL|S1|C274#0
																H	0	150	98.6	+	0	0	8D142M150I	RL|S1|R1571118/1	RL|S1|C274#0
																H	0	150	98.6	+	0	0	8D142M150I	RL|S1|R22085404/1	RL|S1|C274#0
																H	0	150	98.6	-	0	0	10D140M152I	RL|S1|R25941282/1	RL|S1|C274#0
																H	0	150	98.6	-	0	0	10D140M152I	RL|S1|R9884807/1	RL|S1|C274#0
																H	0	150	98.6	-	0	0	11D139M153I	RL|S1|R4536692/1	RL|S1|C274#0
																H	0	150	98.6	-	0	0	145I147M3D	RL|S1|R29579396/1	RL|S1|C274#0
																H	0	150	98.6	-	0	0	146I146M4D	RL|S1|R4869225/1	RL|S1|C274#0
																H	0	150	98.6	-	0	0	2D148M144I	RL|S1|R43769694/1	RL|S1|C274#0
																H	0	150	98.6	-	0	0	3D147M145I	RL|S1|R18254079/1	RL|S1|C274#0
																H	0	150	98.6	-	0	0	3D147M145I	RL|S1|R36865083/1	RL|S1|C274#0
																H	0	150	98.6	-	0	0	6D144M148I	RL|S1|R26056100/1	RL|S1|C274#0
																H	0	150	98.6	-	0	0	8D142M150I	RL|S1|R3201947/2	RL|S1|C274#0
																H	0	150	98.7	+	0	0	107I150M35I	RL|S1|R25162026/2	RL|S1|C274#0
																H	0	150	98.7	+	0	0	110I150M32I	RL|S1|R36087172/2	RL|S1|C274#0
																H	0	150	98.7	+	0	0	132I150M10I	RL|S1|R1645456/2	RL|S1|C274#0
																H	0	150	98.7	+	0	0	132I150M10I	RL|S1|R9595803/1	RL|S1|C274#0
																H	0	150	98.7	+	0	0	13I150M129I	RL|S1|R33026895/2	RL|S1|C274#0
																H	0	150	98.7	+	0	0	14I150M128I	RL|S1|R30843099/1	RL|S1|C274#0
																H	0	150	98.7	+	0	0	19I150M123I	RL|S1|R46993190/1	RL|S1|C274#0
																H	0	150	98.7	+	0	0	213I79M71D	RL|S1|R25651415/2	RL|S1|C274#0
																H	0	150	98.7	+	0	0	214I78M72D	RL|S1|R12044075/2	RL|S1|C274#0
																H	0	150	98.7	+	0	0	214I78M72D	RL|S1|R35347015/2	RL|S1|C274#0
																H	0	150	98.7	+	0	0	216I76M74D	RL|S1|R44498429/1	RL|S1|C274#0
																H	0	150	98.7	+	0	0	217I75M75D	RL|S1|R29535485/1	RL|S1|C274#0
																H	0	150	98.7	+	0	0	217I75M75D	RL|S1|R40847922/1	RL|S1|C274#0
																H	0	150	98.7	+	0	0	22I150M120I	RL|S1|R14793916/1	RL|S1|C274#0
																H	0	150	98.7	+	0	0	23I150M119I	RL|S1|R5233036/1	RL|S1|C274#0
																H	0	150	98.7	+	0	0	27I150M115I	RL|S1|R45571244/2	RL|S1|C274#0
																H	0	150	98.7	+	0	0	28I150M114I	RL|S1|R19477110/1	RL|S1|C274#0
																H	0	150	98.7	+	0	0	29I150M113I	RL|S1|R29189916/1	RL|S1|C274#0
																H	0	150	98.7	+	0	0	29I150M113I	RL|S1|R48006572/2	RL|S1|C274#0
																H	0	150	98.7	+	0	0	3I150M139I	RL|S1|R3980881/2	RL|S1|C274#0
																H	0	150	98.7	+	0	0	41I150M101I	RL|S1|R21016713/1	RL|S1|C274#0
																H	0	150	98.7	+	0	0	47I150M95I	RL|S1|R4022553/2	RL|S1|C274#0
																H	0	150	98.7	+	0	0	53I150M89I	RL|S1|R33883782/1	RL|S1|C274#0
																H	0	150	98.7	+	0	0	59I150M83I	RL|S1|R24048769/1	RL|S1|C274#0
																H	0	150	98.7	+	0	0	65I150M77I	RL|S1|R17261964/1	RL|S1|C274#0
																H	0	150	98.7	+	0	0	72D78M214I	RL|S1|R35587582/1	RL|S1|C274#0
																H	0	150	98.7	+	0	0	75D75M217I	RL|S1|R25954490/1	RL|S1|C274#0
																H	0	150	98.7	+	0	0	77I150M65I	RL|S1|R35427236/1	RL|S1|C274#0
																H	0	150	98.7	+	0	0	78I150M64I	RL|S1|R37947826/1	RL|S1|C274#0
																H	0	150	98.7	+	0	0	84I150M58I	RL|S1|R27179351/2	RL|S1|C274#0
																H	0	150	98.7	+	0	0	96I150M46I	RL|S1|R32425092/1	RL|S1|C274#0
																H	0	150	98.7	+	0	0	98I150M44I	RL|S1|R42741968/1	RL|S1|C274#0
																H	0	150	98.7	-	0	0	109I150M33I	RL|S1|R23738483/1	RL|S1|C274#0
																H	0	150	98.7	-	0	0	117I150M25I	RL|S1|R35301886/1	RL|S1|C274#0
																H	0	150	98.7	-	0	0	129I150M13I	RL|S1|R16678057/1	RL|S1|C274#0
																H	0	150	98.7	-	0	0	129I150M13I	RL|S1|R23989957/2	RL|S1|C274#0
																H	0	150	98.7	-	0	0	133I150M9I	RL|S1|R38895127/2	RL|S1|C274#0
																H	0	150	98.7	-	0	0	139I150M3I	RL|S1|R41190918/1	RL|S1|C274#0
																H	0	150	98.7	-	0	0	14I150M128I	RL|S1|R38686174/1	RL|S1|C274#0
																H	0	150	98.7	-	0	0	15I150M127I	RL|S1|R5401838/1	RL|S1|C274#0
																H	0	150	98.7	-	0	0	213I79M71D	RL|S1|R14634899/1	RL|S1|C274#0
																H	0	150	98.7	-	0	0	216I76M74D	RL|S1|R7370084/1	RL|S1|C274#0
																H	0	150	98.7	-	0	0	217I75M75D	RL|S1|R30030892/1	RL|S1|C274#0
																H	0	150	98.7	-	0	0	217I75M75D	RL|S1|R4263620/2	RL|S1|C274#0
																H	0	150	98.7	-	0	0	217I75M75D	RL|S1|R48006572/1	RL|S1|C274#0
																H	0	150	98.7	-	0	0	21I150M121I	RL|S1|R24435386/1	RL|S1|C274#0
																H	0	150	98.7	-	0	0	27I150M115I	RL|S1|R18635294/1	RL|S1|C274#0
																H	0	150	98.7	-	0	0	2I150M140I	RL|S1|R11087638/2	RL|S1|C274#0
																H	0	150	98.7	-	0	0	32I150M110I	RL|S1|R14569727/1	RL|S1|C274#0
																H	0	150	98.7	-	0	0	32I150M110I	RL|S1|R43488639/2	RL|S1|C274#0
																H	0	150	98.7	-	0	0	37I150M105I	RL|S1|R45304646/1	RL|S1|C274#0
																H	0	150	98.7	-	0	0	48I150M94I	RL|S1|R32440243/1	RL|S1|C274#0
																H	0	150	98.7	-	0	0	53I150M89I	RL|S1|R25954490/2	RL|S1|C274#0
																H	0	150	98.7	-	0	0	57I150M85I	RL|S1|R9647208/1	RL|S1|C274#0
																H	0	150	98.7	-	0	0	62I150M80I	RL|S1|R42400451/1	RL|S1|C274#0
																H	0	150	98.7	-	0	0	70I150M72I	RL|S1|R10132652/1	RL|S1|C274#0
																H	0	150	98.7	-	0	0	71D79M213I	RL|S1|R1152580/2	RL|S1|C274#0
																H	0	150	98.7	-	0	0	72D78M214I	RL|S1|R7186098/2	RL|S1|C274#0
																H	0	150	98.7	-	0	0	74D76M216I	RL|S1|R21510815/2	RL|S1|C274#0
																H	0	150	98.7	-	0	0	75D75M217I	RL|S1|R1723831/1	RL|S1|C274#0
																H	0	150	98.7	-	0	0	75D75M217I	RL|S1|R33410036/2	RL|S1|C274#0
																H	0	150	98.7	-	0	0	75D75M217I	RL|S1|R8495820/1	RL|S1|C274#0
																H	0	150	98.7	-	0	0	86I150M56I	RL|S1|R31405860/2	RL|S1|C274#0
																H	0	150	98.7	-	0	0	91I150M51I	RL|S1|R17420201/1	RL|S1|C274#0
																H	0	150	98.7	-	0	0	91I150M51I	RL|S1|R26856736/2	RL|S1|C274#0
																H	0	150	98.7	-	0	0	93I150M49I	RL|S1|R39375717/2	RL|S1|C274#0
																H	0	150	98.7	-	0	0	D149M143I	RL|S1|R36186596/2	RL|S1|C274#0
																H	0	150	98.8	+	0	0	206I86M64D	RL|S1|R11293831/1	RL|S1|C274#0
																H	0	150	98.8	+	0	0	206I86M64D	RL|S1|R6001123/2	RL|S1|C274#0
																H	0	150	98.8	+	0	0	208I84M66D	RL|S1|R24045020/1	RL|S1|C274#0
																H	0	150	98.8	+	0	0	210I82M68D	RL|S1|R1908747/2	RL|S1|C274#0
																H	0	150	98.8	+	0	0	212I80M70D	RL|S1|R13452968/1	RL|S1|C274#0
																H	0	150	98.8	+	0	0	64D86M206I	RL|S1|R5851394/2	RL|S1|C274#0
																H	0	150	98.8	+	0	0	66D84M208I	RL|S1|R24688837/1	RL|S1|C274#0
																H	0	150	98.8	+	0	0	68D82M210I	RL|S1|R26232533/1	RL|S1|C274#0
																H	0	150	98.8	-	0	0	208I84M66D	RL|S1|R10605635/1	RL|S1|C274#0
																H	0	150	98.8	-	0	0	212I80M70D	RL|S1|R30868130/1	RL|S1|C274#0
																H	0	150	98.8	-	0	0	212I80M70D	RL|S1|R44637005/1	RL|S1|C274#0
																H	0	150	98.8	-	0	0	64D86M206I	RL|S1|R11948092/1	RL|S1|C274#0
																H	0	150	98.8	-	0	0	64D86M206I	RL|S1|R12409155/2	RL|S1|C274#0
																H	0	150	98.8	-	0	0	64D86M206I	RL|S1|R35987320/1	RL|S1|C274#0
																H	0	150	98.8	-	0	0	65D85M207I	RL|S1|R28198095/2	RL|S1|C274#0
																H	0	150	98.8	-	0	0	67D83M209I	RL|S1|R25100441/1	RL|S1|C274#0
																H	0	150	98.8	-	0	0	68D82M210I	RL|S1|R18871719/2	RL|S1|C274#0
																H	0	150	98.8	-	0	0	68D82M210I	RL|S1|R24001933/1	RL|S1|C274#0
																H	0	150	98.8	-	0	0	68D82M210I	RL|S1|R46247732/1	RL|S1|C274#0
																H	0	150	98.8	-	0	0	69D81M211I	RL|S1|R17037911/2	RL|S1|C274#0
																H	0	150	98.8	-	0	0	69D81M211I	RL|S1|R25725008/1	RL|S1|C274#0
																H	0	150	98.8	-	0	0	70D80M212I	RL|S1|R43017078/1	RL|S1|C274#0
																H	0	150	98.9	+	0	0	198I94M56D	RL|S1|R42604643/2	RL|S1|C274#0
																H	0	150	98.9	+	0	0	199I93M57D	RL|S1|R14866218/1	RL|S1|C274#0
																H	0	150	98.9	+	0	0	201I91M59D	RL|S1|R48696296/1	RL|S1|C274#0
																H	0	150	98.9	+	0	0	202I90M60D	RL|S1|R33930063/1	RL|S1|C274#0
																H	0	150	98.9	+	0	0	203I89M61D	RL|S1|R36938983/2	RL|S1|C274#0
																H	0	150	98.9	+	0	0	55D95M197I	RL|S1|R29734224/2	RL|S1|C274#0
																H	0	150	98.9	+	0	0	56D94M198I	RL|S1|R32448773/1	RL|S1|C274#0
																H	0	150	98.9	+	0	0	59D91M201I	RL|S1|R8721871/1	RL|S1|C274#0
																H	0	150	98.9	+	0	0	60D90M202I	RL|S1|R19582134/1	RL|S1|C274#0
																H	0	150	98.9	-	0	0	201I91M59D	RL|S1|R45012585/2	RL|S1|C274#0
																H	0	150	98.9	-	0	0	205I87M63D	RL|S1|R1602394/2	RL|S1|C274#0
																H	0	150	98.9	-	0	0	55D95M197I	RL|S1|R13766257/1	RL|S1|C274#0
																H	0	150	98.9	-	0	0	55D95M197I	RL|S1|R44563012/2	RL|S1|C274#0
																H	0	150	98.9	-	0	0	57D93M199I	RL|S1|R16569630/2	RL|S1|C274#0
																H	0	150	98.9	-	0	0	57D93M199I	RL|S1|R22440991/2	RL|S1|C274#0
																H	0	150	98.9	-	0	0	60D90M202I	RL|S1|R19410938/2	RL|S1|C274#0
																H	0	150	98.9	-	0	0	60D90M202I	RL|S1|R29106198/1	RL|S1|C274#0
																H	0	150	98.9	-	0	0	62D88M204I	RL|S1|R13733295/2	RL|S1|C274#0
																H	0	150	98.9	-	0	0	62D88M204I	RL|S1|R2002995/2	RL|S1|C274#0
																H	0	150	98.9	-	0	0	62D88M204I	RL|S1|R20910228/2	RL|S1|C274#0
																H	0	150	98.9	-	0	0	63D87M205I	RL|S1|R4990796/1	RL|S1|C274#0
																H	0	150	98.9	-	0	0	63D87M205I	RL|S1|R7030271/1	RL|S1|C274#0
																H	0	150	99	+	0	0	187I105M45D	RL|S1|R14388507/1	RL|S1|C274#0
																H	0	150	99	+	0	0	187I105M45D	RL|S1|R42855776/1	RL|S1|C274#0
																H	0	150	99	+	0	0	45D105M187I	RL|S1|R5831432/1	RL|S1|C274#0
																H	0	150	99	+	0	0	48D102M190I	RL|S1|R6402561/2	RL|S1|C274#0
																H	0	150	99	+	0	0	49D101M191I	RL|S1|R14690776/1	RL|S1|C274#0
																H	0	150	99	+	0	0	52D98M194I	RL|S1|R14449796/1	RL|S1|C274#0
																H	0	150	99	+	0	0	53D97M195I	RL|S1|R10025815/1	RL|S1|C274#0
																H	0	150	99	-	0	0	194I98M52D	RL|S1|R18037861/1	RL|S1|C274#0
																H	0	150	99	-	0	0	195I97M53D	RL|S1|R25908792/1	RL|S1|C274#0
																H	0	150	99	-	0	0	46D104M188I	RL|S1|R17083434/2	RL|S1|C274#0
																H	0	150	99	-	0	0	47D103M189I	RL|S1|R42711779/1	RL|S1|C274#0
																H	0	150	99	-	0	0	51D99M193I	RL|S1|R10160933/1	RL|S1|C274#0
																H	0	150	99	-	0	0	51D99M193I	RL|S1|R19718561/1	RL|S1|C274#0
																H	0	150	99.1	+	0	0	33D117M175I	RL|S1|R24589172/1	RL|S1|C274#0
																H	0	150	99.1	+	0	0	37D113M179I	RL|S1|R15584867/1	RL|S1|C274#0
																H	0	150	99.1	+	0	0	39D111M181I	RL|S1|R40013368/1	RL|S1|C274#0
																H	0	150	99.1	+	0	0	39D111M181I	RL|S1|R48916845/1	RL|S1|C274#0
																H	0	150	99.1	+	0	0	41D109M183I	RL|S1|R32894039/1	RL|S1|C274#0
																H	0	150	99.1	+	0	0	42D108M184I	RL|S1|R40015643/1	RL|S1|C274#0
																H	0	150	99.1	-	0	0	33D117M175I	RL|S1|R11656131/2	RL|S1|C274#0
																H	0	150	99.1	-	0	0	33D117M175I	RL|S1|R34040763/1	RL|S1|C274#0
																H	0	150	99.1	-	0	0	39D111M181I	RL|S1|R18195785/2	RL|S1|C274#0
																H	0	150	99.1	-	0	0	39D111M181I	RL|S1|R40529869/2	RL|S1|C274#0
																H	0	150	99.1	-	0	0	40D110M182I	RL|S1|R20145635/2	RL|S1|C274#0
																H	0	150	99.1	-	0	0	44D106M186I	RL|S1|R34801099/1	RL|S1|C274#0
																H	0	150	99.2	+	0	0	161I131M19D	RL|S1|R31465303/1	RL|S1|C274#0
																H	0	150	99.2	+	0	0	173I119M31D	RL|S1|R48369718/1	RL|S1|C274#0
																H	0	150	99.2	+	0	0	174I118M32D	RL|S1|R41024602/1	RL|S1|C274#0
																H	0	150	99.2	+	0	0	21D129M163I	RL|S1|R48639379/1	RL|S1|C274#0
																H	0	150	99.2	+	0	0	22D128M164I	RL|S1|R47893894/1	RL|S1|C274#0
																H	0	150	99.2	-	0	0	172I120M30D	RL|S1|R21691436/1	RL|S1|C274#0
																H	0	150	99.2	-	0	0	173I119M31D	RL|S1|R1645456/1	RL|S1|C274#0
																H	0	150	99.2	-	0	0	18D132M160I	RL|S1|R33126292/1	RL|S1|C274#0
																H	0	150	99.2	-	0	0	23D127M165I	RL|S1|R4905434/2	RL|S1|C274#0
																H	0	150	99.2	-	0	0	24D126M166I	RL|S1|R6500323/1	RL|S1|C274#0
																H	0	150	99.2	-	0	0	25D125M167I	RL|S1|R1622333/2	RL|S1|C274#0
																H	0	150	99.2	-	0	0	26D124M168I	RL|S1|R40610262/1	RL|S1|C274#0
																H	0	150	99.2	-	0	0	27D123M169I	RL|S1|R46281177/1	RL|S1|C274#0
																H	0	150	99.2	-	0	0	28D122M170I	RL|S1|R43551910/2	RL|S1|C274#0
																H	0	150	99.2	-	0	0	29D121M171I	RL|S1|R23326198/1	RL|S1|C274#0
																H	0	150	99.2	-	0	0	30D120M172I	RL|S1|R36417558/2	RL|S1|C274#0
																H	0	150	99.2	-	0	0	31D119M173I	RL|S1|R36729/2	RL|S1|C274#0
																H	0	150	99.3	+	0	0	108I150M34I	RL|S1|R10965100/1	RL|S1|C274#0
																H	0	150	99.3	+	0	0	12D138M154I	RL|S1|R42402641/2	RL|S1|C274#0
																H	0	150	99.3	+	0	0	13D137M155I	RL|S1|R44886236/1	RL|S1|C274#0
																H	0	150	99.3	+	0	0	14D136M156I	RL|S1|R29489403/1	RL|S1|C274#0
																H	0	150	99.3	+	0	0	155I137M13D	RL|S1|R38601468/1	RL|S1|C274#0
																H	0	150	99.3	+	0	0	158I134M16D	RL|S1|R14296239/1	RL|S1|C274#0
																H	0	150	99.3	+	0	0	15D135M157I	RL|S1|R31553559/1	RL|S1|C274#0
																H	0	150	99.3	+	0	0	15D135M157I	RL|S1|R49006073/1	RL|S1|C274#0
																H	0	150	99.3	+	0	0	17I150M125I	RL|S1|R7151207/1	RL|S1|C274#0
																H	0	150	99.3	+	0	0	19I150M123I	RL|S1|R21065801/1	RL|S1|C274#0
																H	0	150	99.3	+	0	0	24I150M118I	RL|S1|R23745687/1	RL|S1|C274#0
																H	0	150	99.3	+	0	0	28I150M114I	RL|S1|R16790841/1	RL|S1|C274#0
																H	0	150	99.3	+	0	0	28I150M114I	RL|S1|R763390/1	RL|S1|C274#0
																H	0	150	99.3	+	0	0	30I150M112I	RL|S1|R15954220/1	RL|S1|C274#0
																H	0	150	99.3	+	0	0	30I150M112I	RL|S1|R41237780/1	RL|S1|C274#0
																H	0	150	99.3	+	0	0	32I150M110I	RL|S1|R31520671/1	RL|S1|C274#0
																H	0	150	99.3	+	0	0	33I150M109I	RL|S1|R4981798/2	RL|S1|C274#0
																H	0	150	99.3	+	0	0	39I150M103I	RL|S1|R33790823/1	RL|S1|C274#0
																H	0	150	99.3	+	0	0	44I150M98I	RL|S1|R5710176/1	RL|S1|C274#0
																H	0	150	99.3	+	0	0	47I150M95I	RL|S1|R31690366/1	RL|S1|C274#0
																H	0	150	99.3	+	0	0	50I150M92I	RL|S1|R8573445/2	RL|S1|C274#0
																H	0	150	99.3	+	0	0	54I150M88I	RL|S1|R47223326/1	RL|S1|C274#0
																H	0	150	99.3	+	0	0	62I150M80I	RL|S1|R11791074/1	RL|S1|C274#0
																H	0	150	99.3	+	0	0	66I150M76I	RL|S1|R39256237/1	RL|S1|C274#0
																H	0	150	99.3	+	0	0	6I150M136I	RL|S1|R21375077/1	RL|S1|C274#0
																H	0	150	99.3	+	0	0	71I150M71I	RL|S1|R876070/1	RL|S1|C274#0
																H	0	150	99.3	+	0	0	75I150M67I	RL|S1|R7662335/1	RL|S1|C274#0
																H	0	150	99.3	+	0	0	77I150M65I	RL|S1|R39997318/2	RL|S1|C274#0
																H	0	150	99.3	+	0	0	I150M141I	RL|S1|R20128588/2	RL|S1|C274#0
																H	0	150	99.3	-	0	0	104I150M38I	RL|S1|R11902590/1	RL|S1|C274#0
																H	0	150	99.3	-	0	0	108I150M34I	RL|S1|R42170930/1	RL|S1|C274#0
																H	0	150	99.3	-	0	0	11D139M153I	RL|S1|R21813477/1	RL|S1|C274#0
																H	0	150	99.3	-	0	0	121I150M21I	RL|S1|R4981798/1	RL|S1|C274#0
																H	0	150	99.3	-	0	0	126I150M16I	RL|S1|R8967337/1	RL|S1|C274#0
																H	0	150	99.3	-	0	0	12D138M154I	RL|S1|R2720726/1	RL|S1|C274#0
																H	0	150	99.3	-	0	0	12D138M154I	RL|S1|R3403398/1	RL|S1|C274#0
																H	0	150	99.3	-	0	0	12D138M154I	RL|S1|R48371842/1	RL|S1|C274#0
																H	0	150	99.3	-	0	0	130I150M12I	RL|S1|R4022553/1	RL|S1|C274#0
																H	0	150	99.3	-	0	0	13D137M155I	RL|S1|R26283397/2	RL|S1|C274#0
																H	0	150	99.3	-	0	0	13I150M129I	RL|S1|R4009074/1	RL|S1|C274#0
																H	0	150	99.3	-	0	0	151I141M9D	RL|S1|R47223326/2	RL|S1|C274#0
																H	0	150	99.3	-	0	0	15I150M127I	RL|S1|R31963578/1	RL|S1|C274#0
																H	0	150	99.3	-	0	0	19I150M123I	RL|S1|R34453768/2	RL|S1|C274#0
																H	0	150	99.3	-	0	0	31I150M111I	RL|S1|R16950980/1	RL|S1|C274#0
																H	0	150	99.3	-	0	0	33I150M109I	RL|S1|R4583065/1	RL|S1|C274#0
																H	0	150	99.3	-	0	0	39I150M103I	RL|S1|R2864479/1	RL|S1|C274#0
																H	0	150	99.3	-	0	0	3I150M139I	RL|S1|R44840990/1	RL|S1|C274#0
																H	0	150	99.3	-	0	0	48I150M94I	RL|S1|R13612875/1	RL|S1|C274#0
																H	0	150	99.3	-	0	0	72I150M70I	RL|S1|R37851296/1	RL|S1|C274#0
																H	0	150	99.3	-	0	0	7D143M149I	RL|S1|R45668270/2	RL|S1|C274#0
																H	0	150	99.3	-	0	0	80I150M62I	RL|S1|R23902794/1	RL|S1|C274#0
																H	1	150	100	+	0	0	18D132M160I	RL|S1|R21242409/1	RL|S1|C328#0
																H	1	150	100	+	0	0	193I99M51D	RL|S1|R44437475/1	RL|S1|C328#0
																H	1	150	100	+	0	0	196I96M54D	RL|S1|R30166910/1	RL|S1|C328#0
																H	1	150	100	+	0	0	198I94M56D	RL|S1|R13450931/1	RL|S1|C328#0
																H	1	150	100	+	0	0	201I91M59D	RL|S1|R8357266/1	RL|S1|C328#0
																H	1	150	100	+	0	0	203I89M61D	RL|S1|R4524796/1	RL|S1|C328#0
																H	1	150	100	+	0	0	210I82M68D	RL|S1|R31647521/1	RL|S1|C328#0
																H	1	150	100	+	0	0	216I76M74D	RL|S1|R33435495/1	RL|S1|C328#0
																H	1	150	100	+	0	0	57D93M199I	RL|S1|R11596138/1	RL|S1|C328#0
																H	1	150	100	-	0	0	109I150M33I	RL|S1|R24236835/1	RL|S1|C328#0
																H	1	150	100	-	0	0	146I146M4D	RL|S1|R2933247/1	RL|S1|C328#0
																H	1	150	100	-	0	0	214I78M72D	RL|S1|R42514229/1	RL|S1|C328#0
																H	1	150	100	-	0	0	32I150M110I	RL|S1|R8458303/1	RL|S1|C328#0
																H	1	150	100	-	0	0	39D111M181I	RL|S1|R7563611/2	RL|S1|C328#0
																H	1	150	100	-	0	0	51D99M193I	RL|S1|R22911664/1	RL|S1|C328#0
																H	1	150	100	-	0	0	68D82M210I	RL|S1|R1618002/1	RL|S1|C328#0
																H	1	150	100	-	0	0	77I150M65I	RL|S1|R32902071/1	RL|S1|C328#0
																H	1	150	97	-	0	0	50D100M192I	RL|S1|R13806376/2	RL|S1|C328#0
																H	1	150	97.1	+	0	0	10D140M152I	RL|S1|R16907218/2	RL|S1|C328#0
																H	1	150	97.1	+	0	0	189I103M47D	RL|S1|R23457774/2	RL|S1|C328#0
																H	1	150	97.1	+	0	0	190I102M48D	RL|S1|R16783701/2	RL|S1|C328#0
																H	1	150	97.2	+	0	0	149I143M7D	RL|S1|R44039185/2	RL|S1|C328#0
																H	1	150	97.2	+	0	0	41D109M183I	RL|S1|R48800656/2	RL|S1|C328#0
																H	1	150	97.2	-	0	0	42D108M184I	RL|S1|R49441146/2	RL|S1|C328#0
																H	1	150	97.2	-	0	0	6D144M148I	RL|S1|R36262976/1	RL|S1|C328#0
																H	1	150	97.3	+	0	0	102I150M40I	RL|S1|R6792584/2	RL|S1|C328#0
																H	1	150	97.3	+	0	0	115I150M27I	RL|S1|R2082403/1	RL|S1|C328#0
																H	1	150	97.3	+	0	0	115I150M27I	RL|S1|R37708923/2	RL|S1|C328#0
																H	1	150	97.3	+	0	0	122I150M20I	RL|S1|R20436302/2	RL|S1|C328#0
																H	1	150	97.3	+	0	0	12I150M130I	RL|S1|R46371918/1	RL|S1|C328#0
																H	1	150	97.3	+	0	0	139I150M3I	RL|S1|R3388243/1	RL|S1|C328#0
																H	1	150	97.3	+	0	0	33I150M109I	RL|S1|R10468451/1	RL|S1|C328#0
																H	1	150	97.3	+	0	0	39D111M181I	RL|S1|R12356906/1	RL|S1|C328#0
																H	1	150	97.3	+	0	0	53I150M89I	RL|S1|R15334333/2	RL|S1|C328#0
																H	1	150	97.3	+	0	0	72I150M70I	RL|S1|R14564795/2	RL|S1|C328#0
																H	1	150	97.3	+	0	0	75I150M67I	RL|S1|R27009159/2	RL|S1|C328#0
																H	1	150	97.3	+	0	0	75I150M67I	RL|S1|R9960933/1	RL|S1|C328#0
																H	1	150	97.3	+	0	0	7I150M135I	RL|S1|R46249771/1	RL|S1|C328#0
																H	1	150	97.3	+	0	0	98I150M44I	RL|S1|R48350686/1	RL|S1|C328#0
																H	1	150	97.3	-	0	0	114I150M28I	RL|S1|R11683758/1	RL|S1|C328#0
																H	1	150	97.3	-	0	0	217I75M75D	RL|S1|R35533999/1	RL|S1|C328#0
																H	1	150	97.3	-	0	0	24I150M118I	RL|S1|R17896328/2	RL|S1|C328#0
																H	1	150	97.3	-	0	0	25I150M117I	RL|S1|R9244826/1	RL|S1|C328#0
																H	1	150	97.3	-	0	0	33I150M109I	RL|S1|R11287277/1	RL|S1|C328#0
																H	1	150	97.3	-	0	0	75D75M217I	RL|S1|R39876682/1	RL|S1|C328#0
																H	1	150	97.3	-	0	0	76I150M66I	RL|S1|R12562067/1	RL|S1|C328#0
																H	1	150	97.3	-	0	0	86I150M56I	RL|S1|R21242409/2	RL|S1|C328#0
																H	1	150	97.3	-	0	0	98I150M44I	RL|S1|R16907218/1	RL|S1|C328#0
																H	1	150	97.4	+	0	0	177I115M35D	RL|S1|R10803597/2	RL|S1|C328#0
																H	1	150	97.4	+	0	0	214I78M72D	RL|S1|R42888198/1	RL|S1|C328#0
																H	1	150	97.4	-	0	0	215I77M73D	RL|S1|R2693021/1	RL|S1|C328#0
																H	1	150	97.4	-	0	0	35D115M177I	RL|S1|R1474104/1	RL|S1|C328#0
																H	1	150	97.5	+	0	0	211I81M69D	RL|S1|R16429379/1	RL|S1|C328#0
																H	1	150	97.5	-	0	0	170I122M28D	RL|S1|R33473540/2	RL|S1|C328#0
																H	1	150	97.5	-	0	0	173I119M31D	RL|S1|R28924501/1	RL|S1|C328#0
																H	1	150	97.5	-	0	0	212I80M70D	RL|S1|R48771248/2	RL|S1|C328#0
																H	1	150	97.5	-	0	0	212I80M70D	RL|S1|R5977845/1	RL|S1|C328#0
																H	1	150	97.6	+	0	0	210I82M68D	RL|S1|R31058396/2	RL|S1|C328#0
																H	1	150	97.6	+	0	0	65D85M207I	RL|S1|R10248555/1	RL|S1|C328#0
																H	1	150	97.6	+	0	0	65D85M207I	RL|S1|R8046838/1	RL|S1|C328#0
																H	1	150	97.6	-	0	0	207I85M65D	RL|S1|R47558162/1	RL|S1|C328#0
																H	1	150	97.7	+	0	0	20D130M162I	RL|S1|R26115378/1	RL|S1|C328#0
																H	1	150	97.7	+	0	0	22D128M164I	RL|S1|R27750231/1	RL|S1|C328#0
																H	1	150	97.7	+	0	0	63D87M205I	RL|S1|R30948509/1	RL|S1|C328#0
																H	1	150	97.8	-	0	0	155I137M13D	RL|S1|R47136506/2	RL|S1|C328#0
																H	1	150	97.8	-	0	0	200I92M58D	RL|S1|R31213133/1	RL|S1|C328#0
																H	1	150	97.8	-	0	0	60D90M202I	RL|S1|R4522400/2	RL|S1|C328#0
																H	1	150	97.9	+	0	0	54D96M196I	RL|S1|R1846091/1	RL|S1|C328#0
																H	1	150	97.9	-	0	0	147I145M5D	RL|S1|R17171359/2	RL|S1|C328#0
																H	1	150	98	+	0	0	121I150M21I	RL|S1|R31948490/2	RL|S1|C328#0
																H	1	150	98	+	0	0	143I149MD	RL|S1|R22431542/2	RL|S1|C328#0
																H	1	150	98	+	0	0	16I150M126I	RL|S1|R23799042/1	RL|S1|C328#0
																H	1	150	98	+	0	0	27I150M115I	RL|S1|R33473540/1	RL|S1|C328#0
																H	1	150	98	+	0	0	33I150M109I	RL|S1|R17171359/1	RL|S1|C328#0
																H	1	150	98	+	0	0	36I150M106I	RL|S1|R19193800/2	RL|S1|C328#0
																H	1	150	98	+	0	0	44I150M98I	RL|S1|R4898888/2	RL|S1|C328#0
																H	1	150	98	+	0	0	51I150M91I	RL|S1|R42514229/2	RL|S1|C328#0
																H	1	150	98	+	0	0	99I150M43I	RL|S1|R35533999/2	RL|S1|C328#0
																H	1	150	98	-	0	0	103I150M39I	RL|S1|R15534/1	RL|S1|C328#0
																H	1	150	98	-	0	0	115I150M27I	RL|S1|R7148659/2	RL|S1|C328#0
																H	1	150	98	-	0	0	119I150M23I	RL|S1|R18327095/1	RL|S1|C328#0
																H	1	150	98	-	0	0	120I150M22I	RL|S1|R4898888/1	RL|S1|C328#0
																H	1	150	98	-	0	0	122I150M20I	RL|S1|R18758882/2	RL|S1|C328#0
																H	1	150	98	-	0	0	123I150M19I	RL|S1|R10785694/1	RL|S1|C328#0
																H	1	150	98	-	0	0	136I150M6I	RL|S1|R10822866/2	RL|S1|C328#0
																H	1	150	98	-	0	0	15I150M127I	RL|S1|R26531143/1	RL|S1|C328#0
																H	1	150	98	-	0	0	192I100M50D	RL|S1|R19193800/1	RL|S1|C328#0
																H	1	150	98	-	0	0	20I150M122I	RL|S1|R18097623/2	RL|S1|C328#0
																H	1	150	98	-	0	0	25I150M117I	RL|S1|R30308436/1	RL|S1|C328#0
																H	1	150	98	-	0	0	38I150M104I	RL|S1|R233830/1	RL|S1|C328#0
																H	1	150	98	-	0	0	47I150M95I	RL|S1|R9587443/2	RL|S1|C328#0
																H	1	150	98	-	0	0	56I150M86I	RL|S1|R31481595/1	RL|S1|C328#0
																H	1	150	98	-	0	0	66I150M76I	RL|S1|R43051703/1	RL|S1|C328#0
																H	1	150	98.2	-	0	0	179I113M37D	RL|S1|R38556199/1	RL|S1|C328#0
																H	1	150	98.2	-	0	0	36D114M178I	RL|S1|R1979756/1	RL|S1|C328#0
																H	1	150	98.3	-	0	0	173I119M31D	RL|S1|R30888045/1	RL|S1|C328#0
																H	1	150	98.3	-	0	0	33D117M175I	RL|S1|R18305553/1	RL|S1|C328#0
																H	1	150	98.4	-	0	0	164I128M22D	RL|S1|R22399052/1	RL|S1|C328#0
																H	1	150	98.4	-	0	0	170I122M28D	RL|S1|R29050343/2	RL|S1|C328#0
																H	1	150	98.4	-	0	0	23D127M165I	RL|S1|R40655285/1	RL|S1|C328#0
																H	1	150	98.5	+	0	0	156I136M14D	RL|S1|R37067625/1	RL|S1|C328#0
																H	1	150	98.5	+	0	0	156I136M14D	RL|S1|R3925711/2	RL|S1|C328#0
																H	1	150	98.5	+	0	0	160I132M18D	RL|S1|R25726123/1	RL|S1|C328#0
																H	1	150	98.5	-	0	0	13D137M155I	RL|S1|R18214113/1	RL|S1|C328#0
																H	1	150	98.5	-	0	0	156I136M14D	RL|S1|R46712348/1	RL|S1|C328#0
																H	1	150	98.5	-	0	0	19D131M161I	RL|S1|R7501341/2	RL|S1|C328#0
																H	1	150	98.6	+	0	0	153I139M11D	RL|S1|R27025873/2	RL|S1|C328#0
																H	1	150	98.6	+	0	0	9D141M151I	RL|S1|R10785694/2	RL|S1|C328#0
																H	1	150	98.6	-	0	0	10D140M152I	RL|S1|R49596492/2	RL|S1|C328#0
																H	1	150	98.6	-	0	0	148I144M6D	RL|S1|R10468451/2	RL|S1|C328#0
																H	1	150	98.7	+	0	0	10I150M132I	RL|S1|R15058837/1	RL|S1|C328#0
																H	1	150	98.7	+	0	0	113I150M29I	RL|S1|R44480699/1	RL|S1|C328#0
																H	1	150	98.7	+	0	0	113I150M29I	RL|S1|R45702601/1	RL|S1|C328#0
																H	1	150	98.7	+	0	0	140I150M2I	RL|S1|R8289155/2	RL|S1|C328#0
																H	1	150	98.7	+	0	0	19I150M123I	RL|S1|R46821402/1	RL|S1|C328#0
																H	1	150	98.7	+	0	0	214I78M72D	RL|S1|R40221085/2	RL|S1|C328#0
																H	1	150	98.7	+	0	0	61I150M81I	RL|S1|R29050343/1	RL|S1|C328#0
																H	1	150	98.7	+	0	0	70I150M72I	RL|S1|R13729643/1	RL|S1|C328#0
																H	1	150	98.7	+	0	0	73D77M215I	RL|S1|R32902071/2	RL|S1|C328#0
																H	1	150	98.7	+	0	0	73I150M69I	RL|S1|R15435638/2	RL|S1|C328#0
																H	1	150	98.7	-	0	0	217I75M75D	RL|S1|R37513859/1	RL|S1|C328#0
																H	1	150	98.7	-	0	0	217I75M75D	RL|S1|R44039185/1	RL|S1|C328#0
																H	1	150	98.7	-	0	0	21I150M121I	RL|S1|R16847665/1	RL|S1|C328#0
																H	1	150	98.7	-	0	0	25I150M117I	RL|S1|R14559950/1	RL|S1|C328#0
																H	1	150	98.7	-	0	0	30I150M112I	RL|S1|R4230796/1	RL|S1|C328#0
																H	1	150	98.7	-	0	0	57I150M85I	RL|S1|R30400334/1	RL|S1|C328#0
																H	1	150	98.7	-	0	0	6I150M136I	RL|S1|R41202099/2	RL|S1|C328#0
																H	1	150	98.7	-	0	0	77I150M65I	RL|S1|R14532612/1	RL|S1|C328#0
																H	1	150	98.7	-	0	0	88I150M54I	RL|S1|R40764728/1	RL|S1|C328#0
																H	1	150	98.8	+	0	0	68D82M210I	RL|S1|R9587443/1	RL|S1|C328#0
																H	1	150	98.8	-	0	0	207I85M65D	RL|S1|R16082891/1	RL|S1|C328#0
																H	1	150	98.8	-	0	0	69D81M211I	RL|S1|R34735412/2	RL|S1|C328#0
																H	1	150	98.9	+	0	0	201I91M59D	RL|S1|R30695183/2	RL|S1|C328#0
																H	1	150	98.9	-	0	0	200I92M58D	RL|S1|R15334333/1	RL|S1|C328#0
																H	1	150	98.9	-	0	0	204I88M62D	RL|S1|R21084158/1	RL|S1|C328#0
																H	1	150	98.9	-	0	0	62D88M204I	RL|S1|R19350163/2	RL|S1|C328#0
																H	1	150	99	+	0	0	191I101M49D	RL|S1|R7432982/2	RL|S1|C328#0
																H	1	150	99	-	0	0	189I103M47D	RL|S1|R32360424/2	RL|S1|C328#0
																H	1	150	99	-	0	0	50D100M192I	RL|S1|R5498275/1	RL|S1|C328#0
																H	1	150	99.1	+	0	0	35D115M177I	RL|S1|R31375338/1	RL|S1|C328#0
																H	1	150	99.1	+	0	0	37D113M179I	RL|S1|R10822866/1	RL|S1|C328#0
																H	1	150	99.2	+	0	0	172I120M30D	RL|S1|R22165135/1	RL|S1|C328#0
																H	1	150	99.2	+	0	0	172I120M30D	RL|S1|R33248867/1	RL|S1|C328#0
																H	1	150	99.2	-	0	0	18D132M160I	RL|S1|R17281229/1	RL|S1|C328#0
																H	1	150	99.3	+	0	0	105I150M37I	RL|S1|R41729538/1	RL|S1|C328#0
																H	1	150	99.3	+	0	0	118I150M24I	RL|S1|R22115435/1	RL|S1|C328#0
																H	1	150	99.3	+	0	0	150M142I	RL|S1|R18758882/1	RL|S1|C328#0
																H	1	150	99.3	+	0	0	156I136M14D	RL|S1|R35442618/1	RL|S1|C328#0
																H	1	150	99.3	+	0	0	18I150M124I	RL|S1|R47136506/1	RL|S1|C328#0
																H	1	150	99.3	+	0	0	81I150M61I	RL|S1|R35568439/1	RL|S1|C328#0
																H	1	150	99.3	-	0	0	13I150M129I	RL|S1|R20779888/1	RL|S1|C328#0
																H	1	150	99.3	-	0	0	154I138M12D	RL|S1|R22182112/1	RL|S1|C328#0
																H	1	150	99.3	-	0	0	17I150M125I	RL|S1|R42870323/1	RL|S1|C328#0
																H	1	150	99.3	-	0	0	19I150M123I	RL|S1|R32249918/1	RL|S1|C328#0
																H	1	150	99.3	-	0	0	37I150M105I	RL|S1|R8046838/2	RL|S1|C328#0
																H	1	150	99.3	-	0	0	6I150M136I	RL|S1|R14533664/2	RL|S1|C328#0
																H	10	150	100	+	0	0	192I100M50D	RL|S1|R4661521/1	RL|S1|C4285#0
																H	10	150	100	+	0	0	213I79M71D	RL|S1|R27334113/1	RL|S1|C4285#0
																H	10	150	100	+	0	0	34D116M176I	RL|S1|R10873068/1	RL|S1|C4285#0
																H	10	150	100	+	0	0	5I150M137I	RL|S1|R14221067/1	RL|S1|C4285#0
																H	10	150	100	+	0	0	73D77M215I	RL|S1|R32652771/1	RL|S1|C4285#0
																H	10	150	100	-	0	0	172I120M30D	RL|S1|R19159790/1	RL|S1|C4285#0
																H	10	150	100	-	0	0	36D114M178I	RL|S1|R33193526/1	RL|S1|C4285#0
																H	10	150	97.1	+	0	0	47D103M189I	RL|S1|R23777175/1	RL|S1|C4285#0
																H	10	150	97.1	-	0	0	188I104M46D	RL|S1|R30093693/2	RL|S1|C4285#0
																H	10	150	97.2	+	0	0	149I143M7D	RL|S1|R17803203/2	RL|S1|C4285#0
																H	10	150	97.2	+	0	0	41D109M183I	RL|S1|R8684912/2	RL|S1|C4285#0
																H	10	150	97.2	-	0	0	185I107M43D	RL|S1|R48350813/1	RL|S1|C4285#0
																H	10	150	97.3	+	0	0	105I150M37I	RL|S1|R48797402/1	RL|S1|C4285#0
																H	10	150	97.3	+	0	0	131I150M11I	RL|S1|R40789142/2	RL|S1|C4285#0
																H	10	150	97.3	+	0	0	31I150M111I	RL|S1|R48389413/1	RL|S1|C4285#0
																H	10	150	97.3	+	0	0	43I150M99I	RL|S1|R5821521/2	RL|S1|C4285#0
																H	10	150	97.3	+	0	0	4D146M146I	RL|S1|R30857785/2	RL|S1|C4285#0
																H	10	150	97.3	+	0	0	4I150M138I	RL|S1|R8665861/1	RL|S1|C4285#0
																H	10	150	97.3	+	0	0	65I150M77I	RL|S1|R48474997/1	RL|S1|C4285#0
																H	10	150	97.3	+	0	0	96I150M46I	RL|S1|R48350813/2	RL|S1|C4285#0
																H	10	150	97.3	-	0	0	135I150M7I	RL|S1|R12806358/1	RL|S1|C4285#0
																H	10	150	97.3	-	0	0	140I150M2I	RL|S1|R48389413/2	RL|S1|C4285#0
																H	10	150	97.3	-	0	0	84I150M58I	RL|S1|R6255937/2	RL|S1|C4285#0
																H	10	150	97.5	+	0	0	172I120M30D	RL|S1|R9609946/2	RL|S1|C4285#0
																H	10	150	97.5	+	0	0	212I80M70D	RL|S1|R49061843/2	RL|S1|C4285#0
																H	10	150	97.6	+	0	0	169I123M27D	RL|S1|R28788785/2	RL|S1|C4285#0
																H	10	150	97.6	+	0	0	207I85M65D	RL|S1|R20815085/2	RL|S1|C4285#0
																H	10	150	97.8	+	0	0	59D91M201I	RL|S1|R594280/2	RL|S1|C4285#0
																H	10	150	97.8	+	0	0	59D91M201I	RL|S1|R6255937/1	RL|S1|C4285#0
																H	10	150	97.8	-	0	0	11D139M153I	RL|S1|R46032236/1	RL|S1|C4285#0
																H	10	150	97.9	+	0	0	152I140M10D	RL|S1|R41262131/2	RL|S1|C4285#0
																H	10	150	97.9	+	0	0	53D97M195I	RL|S1|R48521855/2	RL|S1|C4285#0
																H	10	150	97.9	+	0	0	9D141M151I	RL|S1|R42801526/1	RL|S1|C4285#0
																H	10	150	97.9	-	0	0	54D96M196I	RL|S1|R32881907/2	RL|S1|C4285#0
																H	10	150	97.9	-	0	0	55D95M197I	RL|S1|R21985810/2	RL|S1|C4285#0
																H	10	150	98	+	0	0	110I150M32I	RL|S1|R22920936/1	RL|S1|C4285#0
																H	10	150	98	+	0	0	139I150M3I	RL|S1|R43230088/2	RL|S1|C4285#0
																H	10	150	98	+	0	0	142I150M	RL|S1|R28588340/1	RL|S1|C4285#0
																H	10	150	98	+	0	0	2D148M144I	RL|S1|R48887520/1	RL|S1|C4285#0
																H	10	150	98	+	0	0	39I150M103I	RL|S1|R18855501/2	RL|S1|C4285#0
																H	10	150	98	+	0	0	63I150M79I	RL|S1|R9940306/1	RL|S1|C4285#0
																H	10	150	98	+	0	0	84I150M58I	RL|S1|R9575361/2	RL|S1|C4285#0
																H	10	150	98	+	0	0	89I150M53I	RL|S1|R17418555/2	RL|S1|C4285#0
																H	10	150	98	-	0	0	103I150M39I	RL|S1|R31171412/2	RL|S1|C4285#0
																H	10	150	98	-	0	0	109I150M33I	RL|S1|R28093581/1	RL|S1|C4285#0
																H	10	150	98	-	0	0	126I150M16I	RL|S1|R6583740/2	RL|S1|C4285#0
																H	10	150	98	-	0	0	131I150M11I	RL|S1|R23777175/2	RL|S1|C4285#0
																H	10	150	98	-	0	0	139I150M3I	RL|S1|R42801526/2	RL|S1|C4285#0
																H	10	150	98	-	0	0	141I150MI	RL|S1|R40246078/2	RL|S1|C4285#0
																H	10	150	98	-	0	0	192I100M50D	RL|S1|R9940306/2	RL|S1|C4285#0
																H	10	150	98	-	0	0	49I150M93I	RL|S1|R46769441/2	RL|S1|C4285#0
																H	10	150	98	-	0	0	74I150M68I	RL|S1|R30857785/1	RL|S1|C4285#0
																H	10	150	98	-	0	0	77I150M65I	RL|S1|R9233056/2	RL|S1|C4285#0
																H	10	150	98	-	0	0	91I150M51I	RL|S1|R47304371/1	RL|S1|C4285#0
																H	10	150	98.2	-	0	0	178I114M36D	RL|S1|R27898308/1	RL|S1|C4285#0
																H	10	150	98.2	-	0	0	38D112M180I	RL|S1|R38116561/2	RL|S1|C4285#0
																H	10	150	98.3	+	0	0	173I119M31D	RL|S1|R27185825/1	RL|S1|C4285#0
																H	10	150	98.3	+	0	0	175I117M33D	RL|S1|R9143144/2	RL|S1|C4285#0
																H	10	150	98.3	-	0	0	33D117M175I	RL|S1|R29880046/2	RL|S1|C4285#0
																H	10	150	98.4	+	0	0	22D128M164I	RL|S1|R31171412/1	RL|S1|C4285#0
																H	10	150	98.4	-	0	0	169I123M27D	RL|S1|R29453352/1	RL|S1|C4285#0
																H	10	150	98.5	+	0	0	20D130M162I	RL|S1|R16117394/1	RL|S1|C4285#0
																H	10	150	98.5	-	0	0	161I131M19D	RL|S1|R5388813/1	RL|S1|C4285#0
																H	10	150	98.6	-	0	0	153I139M11D	RL|S1|R17748724/1	RL|S1|C4285#0
																H	10	150	98.7	+	0	0	110I150M32I	RL|S1|R21087879/1	RL|S1|C4285#0
																H	10	150	98.7	+	0	0	122I150M20I	RL|S1|R30710506/1	RL|S1|C4285#0
																H	10	150	98.7	+	0	0	25I150M117I	RL|S1|R49732963/1	RL|S1|C4285#0
																H	10	150	98.7	+	0	0	48I150M94I	RL|S1|R30093693/1	RL|S1|C4285#0
																H	10	150	98.7	+	0	0	71D79M213I	RL|S1|R36660892/1	RL|S1|C4285#0
																H	10	150	98.7	+	0	0	75D75M217I	RL|S1|R39189808/1	RL|S1|C4285#0
																H	10	150	98.7	+	0	0	75D75M217I	RL|S1|R9233056/1	RL|S1|C4285#0
																H	10	150	98.7	+	0	0	81I150M61I	RL|S1|R32542665/1	RL|S1|C4285#0
																H	10	150	98.7	+	0	0	86I150M56I	RL|S1|R33902157/1	RL|S1|C4285#0
																H	10	150	98.7	-	0	0	10I150M132I	RL|S1|R32837632/1	RL|S1|C4285#0
																H	10	150	98.7	-	0	0	215I77M73D	RL|S1|R9575361/1	RL|S1|C4285#0
																H	10	150	98.7	-	0	0	216I76M74D	RL|S1|R37364348/1	RL|S1|C4285#0
																H	10	150	98.7	-	0	0	45I150M97I	RL|S1|R8684912/1	RL|S1|C4285#0
																H	10	150	98.7	-	0	0	74D76M216I	RL|S1|R29248892/2	RL|S1|C4285#0
																H	10	150	98.7	-	0	0	77I150M65I	RL|S1|R16117394/2	RL|S1|C4285#0
																H	10	150	98.7	-	0	0	84I150M58I	RL|S1|R594280/1	RL|S1|C4285#0
																H	10	150	98.8	+	0	0	66D84M208I	RL|S1|R2794189/2	RL|S1|C4285#0
																H	10	150	98.9	-	0	0	203I89M61D	RL|S1|R43135969/1	RL|S1|C4285#0
																H	10	150	99	+	0	0	45D105M187I	RL|S1|R48007814/2	RL|S1|C4285#0
																H	10	150	99	-	0	0	46D104M188I	RL|S1|R37389630/1	RL|S1|C4285#0
																H	10	150	99	-	0	0	52D98M194I	RL|S1|R4422732/1	RL|S1|C4285#0
																H	10	150	99.1	-	0	0	176I116M34D	RL|S1|R17418555/1	RL|S1|C4285#0
																H	10	150	99.1	-	0	0	36D114M178I	RL|S1|R48964312/2	RL|S1|C4285#0
																H	10	150	99.1	-	0	0	42D108M184I	RL|S1|R6215991/1	RL|S1|C4285#0
																H	10	150	99.2	-	0	0	26D124M168I	RL|S1|R8517452/1	RL|S1|C4285#0
																H	10	150	99.3	+	0	0	146I146M4D	RL|S1|R18963152/1	RL|S1|C4285#0
																H	10	150	99.3	+	0	0	152I140M10D	RL|S1|R35729964/2	RL|S1|C4285#0
																H	10	150	99.3	+	0	0	16D134M158I	RL|S1|R6583740/1	RL|S1|C4285#0
																H	10	150	99.3	+	0	0	68I150M74I	RL|S1|R24824104/1	RL|S1|C4285#0
																H	10	150	99.3	-	0	0	112I150M30I	RL|S1|R16263054/1	RL|S1|C4285#0
																H	10	150	99.3	-	0	0	125I150M17I	RL|S1|R1242660/1	RL|S1|C4285#0
																H	10	150	99.3	-	0	0	133I150M9I	RL|S1|R33479494/1	RL|S1|C4285#0
																H	10	150	99.3	-	0	0	153I139M11D	RL|S1|R5821521/1	RL|S1|C4285#0
																H	10	150	99.3	-	0	0	3I150M139I	RL|S1|R6195228/1	RL|S1|C4285#0
																H	10	150	99.3	-	0	0	41I150M101I	RL|S1|R2794189/1	RL|S1|C4285#0
																H	10	150	99.3	-	0	0	5I150M137I	RL|S1|R22526761/2	RL|S1|C4285#0
																H	11	150	100	+	0	0	100I150M42I	RL|S1|R42068433/1	RL|S1|C4952#0
																H	11	150	100	+	0	0	102I150M40I	RL|S1|R23969741/1	RL|S1|C4952#0
																H	11	150	100	+	0	0	120I150M22I	RL|S1|R10695777/2	RL|S1|C4952#0
																H	11	150	100	+	0	0	128I150M14I	RL|S1|R12967917/1	RL|S1|C4952#0
																H	11	150	100	+	0	0	174I118M32D	RL|S1|R31733134/1	RL|S1|C4952#0
																H	11	150	100	+	0	0	181I111M39D	RL|S1|R19748598/1	RL|S1|C4952#0
																H	11	150	100	+	0	0	185I107M43D	RL|S1|R5860737/2	RL|S1|C4952#0
																H	11	150	100	+	0	0	190I102M48D	RL|S1|R47629611/1	RL|S1|C4952#0
																H	11	150	100	+	0	0	191I101M49D	RL|S1|R16037532/1	RL|S1|C4952#0
																H	11	150	100	+	0	0	199I93M57D	RL|S1|R11350606/2	RL|S1|C4952#0
																H	11	150	100	+	0	0	206I86M64D	RL|S1|R16706995/1	RL|S1|C4952#0
																H	11	150	100	+	0	0	207I85M65D	RL|S1|R9997211/1	RL|S1|C4952#0
																H	11	150	100	+	0	0	208I84M66D	RL|S1|R14897121/1	RL|S1|C4952#0
																H	11	150	100	+	0	0	210I82M68D	RL|S1|R20366572/2	RL|S1|C4952#0
																H	11	150	100	+	0	0	31I150M111I	RL|S1|R48877361/1	RL|S1|C4952#0
																H	11	150	100	+	0	0	34I150M108I	RL|S1|R45688135/1	RL|S1|C4952#0
																H	11	150	100	+	0	0	45D105M187I	RL|S1|R30554242/1	RL|S1|C4952#0
																H	11	150	100	+	0	0	45D105M187I	RL|S1|R35458261/1	RL|S1|C4952#0
																H	11	150	100	+	0	0	48D102M190I	RL|S1|R37194641/1	RL|S1|C4952#0
																H	11	150	100	+	0	0	5I150M137I	RL|S1|R3806059/1	RL|S1|C4952#0
																H	11	150	100	+	0	0	72I150M70I	RL|S1|R2027974/1	RL|S1|C4952#0
																H	11	150	100	+	0	0	79I150M63I	RL|S1|R10840294/1	RL|S1|C4952#0
																H	11	150	100	+	0	0	97I150M45I	RL|S1|R37465906/2	RL|S1|C4952#0
																H	11	150	100	+	0	0	D149M143I	RL|S1|R340366/1	RL|S1|C4952#0
																H	11	150	100	-	0	0	160I132M18D	RL|S1|R42432578/1	RL|S1|C4952#0
																H	11	150	100	-	0	0	178I114M36D	RL|S1|R37826115/1	RL|S1|C4952#0
																H	11	150	100	-	0	0	215I77M73D	RL|S1|R41567191/2	RL|S1|C4952#0
																H	11	150	100	-	0	0	215I77M73D	RL|S1|R45554252/1	RL|S1|C4952#0
																H	11	150	100	-	0	0	29D121M171I	RL|S1|R42377261/2	RL|S1|C4952#0
																H	11	150	100	-	0	0	35D115M177I	RL|S1|R7684746/2	RL|S1|C4952#0
																H	11	150	100	-	0	0	45I150M97I	RL|S1|R13969624/1	RL|S1|C4952#0
																H	11	150	100	-	0	0	48D102M190I	RL|S1|R5561077/1	RL|S1|C4952#0
																H	11	150	100	-	0	0	56D94M198I	RL|S1|R15988455/1	RL|S1|C4952#0
																H	11	150	100	-	0	0	69D81M211I	RL|S1|R26193762/1	RL|S1|C4952#0
																H	11	150	100	-	0	0	88I150M54I	RL|S1|R21884643/1	RL|S1|C4952#0
																H	11	150	100	-	0	0	94I150M48I	RL|S1|R1282451/1	RL|S1|C4952#0
																H	11	150	97	-	0	0	15D135M157I	RL|S1|R14290467/2	RL|S1|C4952#0
																H	11	150	97.1	+	0	0	155I137M13D	RL|S1|R23893274/2	RL|S1|C4952#0
																H	11	150	97.1	+	0	0	187I105M45D	RL|S1|R34091221/1	RL|S1|C4952#0
																H	11	150	97.1	+	0	0	45D105M187I	RL|S1|R42938962/2	RL|S1|C4952#0
																H	11	150	97.1	+	0	0	46D104M188I	RL|S1|R16942374/1	RL|S1|C4952#0
																H	11	150	97.1	+	0	0	48D102M190I	RL|S1|R30786748/2	RL|S1|C4952#0
																H	11	150	97.1	-	0	0	153I139M11D	RL|S1|R48877361/2	RL|S1|C4952#0
																H	11	150	97.1	-	0	0	188I104M46D	RL|S1|R37325516/2	RL|S1|C4952#0
																H	11	150	97.2	+	0	0	8D142M150I	RL|S1|R34306524/2	RL|S1|C4952#0
																H	11	150	97.2	-	0	0	183I109M41D	RL|S1|R37411905/1	RL|S1|C4952#0
																H	11	150	97.3	+	0	0	103I150M39I	RL|S1|R2130936/1	RL|S1|C4952#0
																H	11	150	97.3	+	0	0	105I150M37I	RL|S1|R37325516/1	RL|S1|C4952#0
																H	11	150	97.3	+	0	0	112I150M30I	RL|S1|R36695453/2	RL|S1|C4952#0
																H	11	150	97.3	+	0	0	126I150M16I	RL|S1|R2075436/2	RL|S1|C4952#0
																H	11	150	97.3	+	0	0	12I150M130I	RL|S1|R11677734/2	RL|S1|C4952#0
																H	11	150	97.3	+	0	0	136I150M6I	RL|S1|R5629390/1	RL|S1|C4952#0
																H	11	150	97.3	+	0	0	145I147M3D	RL|S1|R47653234/2	RL|S1|C4952#0
																H	11	150	97.3	+	0	0	14I150M128I	RL|S1|R35231003/1	RL|S1|C4952#0
																H	11	150	97.3	+	0	0	150M142I	RL|S1|R1024289/2	RL|S1|C4952#0
																H	11	150	97.3	+	0	0	150M142I	RL|S1|R42486039/2	RL|S1|C4952#0
																H	11	150	97.3	+	0	0	181I111M39D	RL|S1|R40790834/1	RL|S1|C4952#0
																H	11	150	97.3	+	0	0	31I150M111I	RL|S1|R42432578/2	RL|S1|C4952#0
																H	11	150	97.3	+	0	0	34I150M108I	RL|S1|R22797510/2	RL|S1|C4952#0
																H	11	150	97.3	+	0	0	47I150M95I	RL|S1|R37411905/2	RL|S1|C4952#0
																H	11	150	97.3	+	0	0	53I150M89I	RL|S1|R28551489/1	RL|S1|C4952#0
																H	11	150	97.3	+	0	0	62I150M80I	RL|S1|R2880806/1	RL|S1|C4952#0
																H	11	150	97.3	+	0	0	65I150M77I	RL|S1|R35884850/2	RL|S1|C4952#0
																H	11	150	97.3	+	0	0	72I150M70I	RL|S1|R30440063/2	RL|S1|C4952#0
																H	11	150	97.3	+	0	0	76I150M66I	RL|S1|R23168545/2	RL|S1|C4952#0
																H	11	150	97.3	+	0	0	91I150M51I	RL|S1|R34889377/2	RL|S1|C4952#0
																H	11	150	97.3	-	0	0	104I150M38I	RL|S1|R1310624/1	RL|S1|C4952#0
																H	11	150	97.3	-	0	0	10I150M132I	RL|S1|R40312797/2	RL|S1|C4952#0
																H	11	150	97.3	-	0	0	110I150M32I	RL|S1|R43071241/1	RL|S1|C4952#0
																H	11	150	97.3	-	0	0	112I150M30I	RL|S1|R31703754/1	RL|S1|C4952#0
																H	11	150	97.3	-	0	0	115I150M27I	RL|S1|R22797510/1	RL|S1|C4952#0
																H	11	150	97.3	-	0	0	132I150M10I	RL|S1|R18019772/2	RL|S1|C4952#0
																H	11	150	97.3	-	0	0	137I150M5I	RL|S1|R8744076/1	RL|S1|C4952#0
																H	11	150	97.3	-	0	0	24I150M118I	RL|S1|R12062209/1	RL|S1|C4952#0
																H	11	150	97.3	-	0	0	25I150M117I	RL|S1|R7340832/2	RL|S1|C4952#0
																H	11	150	97.3	-	0	0	2I150M140I	RL|S1|R18323532/2	RL|S1|C4952#0
																H	11	150	97.3	-	0	0	43I150M99I	RL|S1|R47559530/2	RL|S1|C4952#0
																H	11	150	97.3	-	0	0	45I150M97I	RL|S1|R4682156/1	RL|S1|C4952#0
																H	11	150	97.3	-	0	0	52I150M90I	RL|S1|R31013639/1	RL|S1|C4952#0
																H	11	150	97.3	-	0	0	76I150M66I	RL|S1|R30554242/2	RL|S1|C4952#0
																H	11	150	97.3	-	0	0	85I150M57I	RL|S1|R8647600/1	RL|S1|C4952#0
																H	11	150	97.3	-	0	0	99I150M43I	RL|S1|R15721280/2	RL|S1|C4952#0
																H	11	150	97.3	-	0	0	I150M141I	RL|S1|R9360919/2	RL|S1|C4952#0
																H	11	150	97.4	+	0	0	178I114M36D	RL|S1|R44485568/2	RL|S1|C4952#0
																H	11	150	97.4	+	0	0	36D114M178I	RL|S1|R43223149/1	RL|S1|C4952#0
																H	11	150	97.4	+	0	0	74D76M216I	RL|S1|R14010675/1	RL|S1|C4952#0
																H	11	150	97.4	-	0	0	176I116M34D	RL|S1|R31278943/2	RL|S1|C4952#0
																H	11	150	97.5	+	0	0	171I121M29D	RL|S1|R26152735/1	RL|S1|C4952#0
																H	11	150	97.5	+	0	0	29D121M171I	RL|S1|R7032857/1	RL|S1|C4952#0
																H	11	150	97.5	+	0	0	29D121M171I	RL|S1|R8647600/2	RL|S1|C4952#0
																H	11	150	97.5	+	0	0	69D81M211I	RL|S1|R18551831/2	RL|S1|C4952#0
																H	11	150	97.5	+	0	0	71D79M213I	RL|S1|R7684746/1	RL|S1|C4952#0
																H	11	150	97.5	-	0	0	171I121M29D	RL|S1|R30282671/2	RL|S1|C4952#0
																H	11	150	97.5	-	0	0	172I120M30D	RL|S1|R45333643/2	RL|S1|C4952#0
																H	11	150	97.5	-	0	0	172I120M30D	RL|S1|R9650923/2	RL|S1|C4952#0
																H	11	150	97.5	-	0	0	211I81M69D	RL|S1|R13043682/2	RL|S1|C4952#0
																H	11	150	97.5	-	0	0	30D120M172I	RL|S1|R30230732/1	RL|S1|C4952#0
																H	11	150	97.5	-	0	0	32D118M174I	RL|S1|R40839550/1	RL|S1|C4952#0
																H	11	150	97.6	+	0	0	165I127M23D	RL|S1|R10813760/1	RL|S1|C4952#0
																H	11	150	97.6	+	0	0	167I125M25D	RL|S1|R10139984/1	RL|S1|C4952#0
																H	11	150	97.6	+	0	0	167I125M25D	RL|S1|R5934476/1	RL|S1|C4952#0
																H	11	150	97.6	+	0	0	168I124M26D	RL|S1|R44916616/2	RL|S1|C4952#0
																H	11	150	97.6	+	0	0	23D127M165I	RL|S1|R3667680/1	RL|S1|C4952#0
																H	11	150	97.6	+	0	0	25D125M167I	RL|S1|R15770451/2	RL|S1|C4952#0
																H	11	150	97.6	+	0	0	26D124M168I	RL|S1|R43071241/2	RL|S1|C4952#0
																H	11	150	97.6	-	0	0	23D127M165I	RL|S1|R10942145/1	RL|S1|C4952#0
																H	11	150	97.6	-	0	0	23D127M165I	RL|S1|R26752698/2	RL|S1|C4952#0
																H	11	150	97.6	-	0	0	27D123M169I	RL|S1|R18159465/1	RL|S1|C4952#0
																H	11	150	97.6	-	0	0	27D123M169I	RL|S1|R26546175/2	RL|S1|C4952#0
																H	11	150	97.7	+	0	0	18D132M160I	RL|S1|R7469614/1	RL|S1|C4952#0
																H	11	150	97.7	+	0	0	22D128M164I	RL|S1|R37086114/2	RL|S1|C4952#0
																H	11	150	97.7	+	0	0	62D88M204I	RL|S1|R37956858/2	RL|S1|C4952#0
																H	11	150	97.7	-	0	0	160I132M18D	RL|S1|R23168545/1	RL|S1|C4952#0
																H	11	150	97.7	-	0	0	22D128M164I	RL|S1|R14174121/1	RL|S1|C4952#0
																H	11	150	97.7	-	0	0	62D88M204I	RL|S1|R33719920/2	RL|S1|C4952#0
																H	11	150	97.7	-	0	0	63D87M205I	RL|S1|R11381300/2	RL|S1|C4952#0
																H	11	150	97.8	+	0	0	13D137M155I	RL|S1|R41062348/1	RL|S1|C4952#0
																H	11	150	97.8	+	0	0	14D136M156I	RL|S1|R33408277/2	RL|S1|C4952#0
																H	11	150	97.8	+	0	0	153I139M11D	RL|S1|R44602922/2	RL|S1|C4952#0
																H	11	150	97.8	+	0	0	156I136M14D	RL|S1|R40383653/1	RL|S1|C4952#0
																H	11	150	97.8	+	0	0	15D135M157I	RL|S1|R1310624/2	RL|S1|C4952#0
																H	11	150	97.8	+	0	0	200I92M58D	RL|S1|R45869706/2	RL|S1|C4952#0
																H	11	150	97.8	+	0	0	61D89M203I	RL|S1|R11850437/1	RL|S1|C4952#0
																H	11	150	97.8	-	0	0	16D134M158I	RL|S1|R18040006/1	RL|S1|C4952#0
																H	11	150	97.8	-	0	0	57D93M199I	RL|S1|R37510671/1	RL|S1|C4952#0
																H	11	150	97.8	-	0	0	59D91M201I	RL|S1|R24647845/1	RL|S1|C4952#0
																H	11	150	97.8	-	0	0	59D91M201I	RL|S1|R32255824/2	RL|S1|C4952#0
																H	11	150	97.9	+	0	0	150I142M8D	RL|S1|R4160585/1	RL|S1|C4952#0
																H	11	150	97.9	+	0	0	152I140M10D	RL|S1|R34722708/2	RL|S1|C4952#0
																H	11	150	97.9	+	0	0	195I97M53D	RL|S1|R19267309/2	RL|S1|C4952#0
																H	11	150	97.9	+	0	0	53D97M195I	RL|S1|R43078557/1	RL|S1|C4952#0
																H	11	150	98	+	0	0	101I150M41I	RL|S1|R31305597/2	RL|S1|C4952#0
																H	11	150	98	+	0	0	101I150M41I	RL|S1|R34943936/2	RL|S1|C4952#0
																H	11	150	98	+	0	0	116I150M26I	RL|S1|R43736880/1	RL|S1|C4952#0
																H	11	150	98	+	0	0	117I150M25I	RL|S1|R41567191/1	RL|S1|C4952#0
																H	11	150	98	+	0	0	126I150M16I	RL|S1|R35600272/1	RL|S1|C4952#0
																H	11	150	98	+	0	0	127I150M15I	RL|S1|R34328590/1	RL|S1|C4952#0
																H	11	150	98	+	0	0	137I150M5I	RL|S1|R9943672/1	RL|S1|C4952#0
																H	11	150	98	+	0	0	138I150M4I	RL|S1|R30481146/2	RL|S1|C4952#0
																H	11	150	98	+	0	0	21I150M121I	RL|S1|R31848251/1	RL|S1|C4952#0
																H	11	150	98	+	0	0	23I150M119I	RL|S1|R5144594/1	RL|S1|C4952#0
																H	11	150	98	+	0	0	36I150M106I	RL|S1|R23919723/1	RL|S1|C4952#0
																H	11	150	98	+	0	0	3D147M145I	RL|S1|R36672028/2	RL|S1|C4952#0
																H	11	150	98	+	0	0	3I150M139I	RL|S1|R22703005/2	RL|S1|C4952#0
																H	11	150	98	+	0	0	60I150M82I	RL|S1|R16313555/1	RL|S1|C4952#0
																H	11	150	98	+	0	0	61I150M81I	RL|S1|R45601939/2	RL|S1|C4952#0
																H	11	150	98	+	0	0	67I150M75I	RL|S1|R1627012/2	RL|S1|C4952#0
																H	11	150	98	+	0	0	73I150M69I	RL|S1|R13043682/1	RL|S1|C4952#0
																H	11	150	98	+	0	0	76I150M66I	RL|S1|R20997978/1	RL|S1|C4952#0
																H	11	150	98	+	0	0	87I150M55I	RL|S1|R45554252/2	RL|S1|C4952#0
																H	11	150	98	+	0	0	88I150M54I	RL|S1|R9751708/2	RL|S1|C4952#0
																H	11	150	98	+	0	0	D149M143I	RL|S1|R24496761/1	RL|S1|C4952#0
																H	11	150	98	-	0	0	116I150M26I	RL|S1|R23171458/1	RL|S1|C4952#0
																H	11	150	98	-	0	0	121I150M21I	RL|S1|R24496761/2	RL|S1|C4952#0
																H	11	150	98	-	0	0	126I150M16I	RL|S1|R1024289/1	RL|S1|C4952#0
																H	11	150	98	-	0	0	126I150M16I	RL|S1|R28313898/2	RL|S1|C4952#0
																H	11	150	98	-	0	0	126I150M16I	RL|S1|R43785865/1	RL|S1|C4952#0
																H	11	150	98	-	0	0	13I150M129I	RL|S1|R48061316/1	RL|S1|C4952#0
																H	11	150	98	-	0	0	16I150M126I	RL|S1|R6220981/1	RL|S1|C4952#0
																H	11	150	98	-	0	0	24I150M118I	RL|S1|R13924943/1	RL|S1|C4952#0
																H	11	150	98	-	0	0	25I150M117I	RL|S1|R11850437/2	RL|S1|C4952#0
																H	11	150	98	-	0	0	28I150M114I	RL|S1|R18984281/1	RL|S1|C4952#0
																H	11	150	98	-	0	0	31I150M111I	RL|S1|R15399505/1	RL|S1|C4952#0
																H	11	150	98	-	0	0	40I150M102I	RL|S1|R21803920/1	RL|S1|C4952#0
																H	11	150	98	-	0	0	48D102M190I	RL|S1|R27137415/2	RL|S1|C4952#0
																H	11	150	98	-	0	0	48I150M94I	RL|S1|R37330636/2	RL|S1|C4952#0
																H	11	150	98	-	0	0	49D101M191I	RL|S1|R30733153/1	RL|S1|C4952#0
																H	11	150	98	-	0	0	52D98M194I	RL|S1|R29841087/2	RL|S1|C4952#0
																H	11	150	98	-	0	0	52I150M90I	RL|S1|R18551831/1	RL|S1|C4952#0
																H	11	150	98	-	0	0	53I150M89I	RL|S1|R11594260/1	RL|S1|C4952#0
																H	11	150	98	-	0	0	57I150M85I	RL|S1|R10407104/2	RL|S1|C4952#0
																H	11	150	98	-	0	0	66I150M76I	RL|S1|R3499173/1	RL|S1|C4952#0
																H	11	150	98	-	0	0	75I150M67I	RL|S1|R36753016/1	RL|S1|C4952#0
																H	11	150	98	-	0	0	76I150M66I	RL|S1|R33868212/1	RL|S1|C4952#0
																H	11	150	98	-	0	0	77I150M65I	RL|S1|R35134533/2	RL|S1|C4952#0
																H	11	150	98	-	0	0	7I150M135I	RL|S1|R14860787/1	RL|S1|C4952#0
																H	11	150	98	-	0	0	84I150M58I	RL|S1|R43223149/2	RL|S1|C4952#0
																H	11	150	98	-	0	0	93I150M49I	RL|S1|R46332047/1	RL|S1|C4952#0
																H	11	150	98.1	-	0	0	42D108M184I	RL|S1|R1180318/2	RL|S1|C4952#0
																H	11	150	98.2	+	0	0	179I113M37D	RL|S1|R48256517/2	RL|S1|C4952#0
																H	11	150	98.2	+	0	0	39D111M181I	RL|S1|R15721280/1	RL|S1|C4952#0
																H	11	150	98.2	+	0	0	39D111M181I	RL|S1|R25467858/1	RL|S1|C4952#0
																H	11	150	98.2	+	0	0	40D110M182I	RL|S1|R47559530/1	RL|S1|C4952#0
																H	11	150	98.2	-	0	0	181I111M39D	RL|S1|R11290692/1	RL|S1|C4952#0
																H	11	150	98.3	+	0	0	174I118M32D	RL|S1|R41756389/2	RL|S1|C4952#0
																H	11	150	98.3	+	0	0	175I117M33D	RL|S1|R6847552/2	RL|S1|C4952#0
																H	11	150	98.3	+	0	0	177I115M35D	RL|S1|R17296548/1	RL|S1|C4952#0
																H	11	150	98.3	-	0	0	31D119M173I	RL|S1|R12153197/1	RL|S1|C4952#0
																H	11	150	98.4	+	0	0	165I127M23D	RL|S1|R26889317/1	RL|S1|C4952#0
																H	11	150	98.4	+	0	0	169I123M27D	RL|S1|R2549180/1	RL|S1|C4952#0
																H	11	150	98.4	+	0	0	24D126M166I	RL|S1|R8466063/2	RL|S1|C4952#0
																H	11	150	98.5	+	0	0	14D136M156I	RL|S1|R8744076/2	RL|S1|C4952#0
																H	11	150	98.5	+	0	0	155I137M13D	RL|S1|R25672290/1	RL|S1|C4952#0
																H	11	150	98.5	-	0	0	14D136M156I	RL|S1|R43678865/2	RL|S1|C4952#0
																H	11	150	98.5	-	0	0	17D133M159I	RL|S1|R9491000/1	RL|S1|C4952#0
																H	11	150	98.5	-	0	0	19D131M161I	RL|S1|R32650315/2	RL|S1|C4952#0
																H	11	150	98.6	+	0	0	11D139M153I	RL|S1|R7221927/2	RL|S1|C4952#0
																H	11	150	98.6	+	0	0	4D146M146I	RL|S1|R15785846/2	RL|S1|C4952#0
																H	11	150	98.6	+	0	0	6D144M148I	RL|S1|R34958677/1	RL|S1|C4952#0
																H	11	150	98.6	-	0	0	147I145M5D	RL|S1|R23369491/1	RL|S1|C4952#0
																H	11	150	98.6	-	0	0	148I144M6D	RL|S1|R29535740/1	RL|S1|C4952#0
																H	11	150	98.6	-	0	0	153I139M11D	RL|S1|R13974957/2	RL|S1|C4952#0
																H	11	150	98.6	-	0	0	154I138M12D	RL|S1|R2880806/2	RL|S1|C4952#0
																H	11	150	98.6	-	0	0	3D147M145I	RL|S1|R29973000/1	RL|S1|C4952#0
																H	11	150	98.6	-	0	0	4D146M146I	RL|S1|R40002984/1	RL|S1|C4952#0
																H	11	150	98.7	+	0	0	107I150M35I	RL|S1|R16100433/1	RL|S1|C4952#0
																H	11	150	98.7	+	0	0	115I150M27I	RL|S1|R34370519/1	RL|S1|C4952#0
																H	11	150	98.7	+	0	0	117I150M25I	RL|S1|R6689352/1	RL|S1|C4952#0
																H	11	150	98.7	+	0	0	119I150M23I	RL|S1|R19362442/1	RL|S1|C4952#0
																H	11	150	98.7	+	0	0	122I150M20I	RL|S1|R19580087/1	RL|S1|C4952#0
																H	11	150	98.7	+	0	0	123I150M19I	RL|S1|R39957547/2	RL|S1|C4952#0
																H	11	150	98.7	+	0	0	124I150M18I	RL|S1|R27488548/1	RL|S1|C4952#0
																H	11	150	98.7	+	0	0	138I150M4I	RL|S1|R28328659/1	RL|S1|C4952#0
																H	11	150	98.7	+	0	0	19I150M123I	RL|S1|R30282671/1	RL|S1|C4952#0
																H	11	150	98.7	+	0	0	214I78M72D	RL|S1|R35560136/2	RL|S1|C4952#0
																H	11	150	98.7	+	0	0	215I77M73D	RL|S1|R10284801/1	RL|S1|C4952#0
																H	11	150	98.7	+	0	0	215I77M73D	RL|S1|R3537690/1	RL|S1|C4952#0
																H	11	150	98.7	+	0	0	22I150M120I	RL|S1|R33510404/1	RL|S1|C4952#0
																H	11	150	98.7	+	0	0	41I150M101I	RL|S1|R47115113/2	RL|S1|C4952#0
																H	11	150	98.7	+	0	0	55I150M87I	RL|S1|R36262984/1	RL|S1|C4952#0
																H	11	150	98.7	+	0	0	56I150M86I	RL|S1|R28313898/1	RL|S1|C4952#0
																H	11	150	98.7	+	0	0	57I150M85I	RL|S1|R3701750/1	RL|S1|C4952#0
																H	11	150	98.7	+	0	0	68I150M74I	RL|S1|R1372273/1	RL|S1|C4952#0
																H	11	150	98.7	+	0	0	73D77M215I	RL|S1|R31013639/2	RL|S1|C4952#0
																H	11	150	98.7	+	0	0	75I150M67I	RL|S1|R41519395/1	RL|S1|C4952#0
																H	11	150	98.7	+	0	0	79I150M63I	RL|S1|R49039822/1	RL|S1|C4952#0
																H	11	150	98.7	+	0	0	80I150M62I	RL|S1|R22855440/1	RL|S1|C4952#0
																H	11	150	98.7	+	0	0	80I150M62I	RL|S1|R25504210/1	RL|S1|C4952#0
																H	11	150	98.7	+	0	0	81I150M61I	RL|S1|R27183154/2	RL|S1|C4952#0
																H	11	150	98.7	-	0	0	102I150M40I	RL|S1|R16733009/1	RL|S1|C4952#0
																H	11	150	98.7	-	0	0	104I150M38I	RL|S1|R40622007/1	RL|S1|C4952#0
																H	11	150	98.7	-	0	0	104I150M38I	RL|S1|R7469614/2	RL|S1|C4952#0
																H	11	150	98.7	-	0	0	108I150M34I	RL|S1|R340366/2	RL|S1|C4952#0
																H	11	150	98.7	-	0	0	117I150M25I	RL|S1|R34001672/1	RL|S1|C4952#0
																H	11	150	98.7	-	0	0	125I150M17I	RL|S1|R15785846/1	RL|S1|C4952#0
																H	11	150	98.7	-	0	0	128I150M14I	RL|S1|R15770451/1	RL|S1|C4952#0
																H	11	150	98.7	-	0	0	131I150M11I	RL|S1|R7221927/1	RL|S1|C4952#0
																H	11	150	98.7	-	0	0	133I150M9I	RL|S1|R34306524/1	RL|S1|C4952#0
																H	11	150	98.7	-	0	0	18I150M124I	RL|S1|R37687370/1	RL|S1|C4952#0
																H	11	150	98.7	-	0	0	29I150M113I	RL|S1|R26919108/1	RL|S1|C4952#0
																H	11	150	98.7	-	0	0	29I150M113I	RL|S1|R40429909/1	RL|S1|C4952#0
																H	11	150	98.7	-	0	0	35I150M107I	RL|S1|R38766773/1	RL|S1|C4952#0
																H	11	150	98.7	-	0	0	47I150M95I	RL|S1|R6226885/1	RL|S1|C4952#0
																H	11	150	98.7	-	0	0	48I150M94I	RL|S1|R21925157/1	RL|S1|C4952#0
																H	11	150	98.7	-	0	0	50I150M92I	RL|S1|R42477385/2	RL|S1|C4952#0
																H	11	150	98.7	-	0	0	51I150M91I	RL|S1|R35458261/2	RL|S1|C4952#0
																H	11	150	98.7	-	0	0	54I150M88I	RL|S1|R32594058/1	RL|S1|C4952#0
																H	11	150	98.7	-	0	0	62I150M80I	RL|S1|R10771669/1	RL|S1|C4952#0
																H	11	150	98.7	-	0	0	71D79M213I	RL|S1|R38036032/1	RL|S1|C4952#0
																H	11	150	98.7	-	0	0	73I150M69I	RL|S1|R30786748/1	RL|S1|C4952#0
																H	11	150	98.7	-	0	0	74D76M216I	RL|S1|R29525375/2	RL|S1|C4952#0
																H	11	150	98.7	-	0	0	74D76M216I	RL|S1|R45421685/1	RL|S1|C4952#0
																H	11	150	98.7	-	0	0	75D75M217I	RL|S1|R47725782/1	RL|S1|C4952#0
																H	11	150	98.7	-	0	0	87I150M55I	RL|S1|R25467858/2	RL|S1|C4952#0
																H	11	150	98.7	-	0	0	92I150M50I	RL|S1|R49526364/2	RL|S1|C4952#0
																H	11	150	98.7	-	0	0	96I150M46I	RL|S1|R31232462/2	RL|S1|C4952#0
																H	11	150	98.7	-	0	0	98I150M44I	RL|S1|R48317133/1	RL|S1|C4952#0
																H	11	150	98.7	-	0	0	9I150M133I	RL|S1|R37762225/1	RL|S1|C4952#0
																H	11	150	98.7	-	0	0	9I150M133I	RL|S1|R42101503/1	RL|S1|C4952#0
																H	11	150	98.8	+	0	0	65D85M207I	RL|S1|R36753016/2	RL|S1|C4952#0
																H	11	150	98.8	+	0	0	65D85M207I	RL|S1|R46216145/1	RL|S1|C4952#0
																H	11	150	98.8	+	0	0	67D83M209I	RL|S1|R37330636/1	RL|S1|C4952#0
																H	11	150	98.8	+	0	0	69D81M211I	RL|S1|R31804651/2	RL|S1|C4952#0
																H	11	150	98.8	-	0	0	209I83M67D	RL|S1|R23969741/2	RL|S1|C4952#0
																H	11	150	98.8	-	0	0	210I82M68D	RL|S1|R31305597/1	RL|S1|C4952#0
																H	11	150	98.8	-	0	0	70D80M212I	RL|S1|R14739530/1	RL|S1|C4952#0
																H	11	150	98.9	+	0	0	197I95M55D	RL|S1|R39625739/1	RL|S1|C4952#0
																H	11	150	98.9	+	0	0	197I95M55D	RL|S1|R48009926/2	RL|S1|C4952#0
																H	11	150	98.9	+	0	0	201I91M59D	RL|S1|R15933530/1	RL|S1|C4952#0
																H	11	150	98.9	+	0	0	58D92M200I	RL|S1|R13969624/2	RL|S1|C4952#0
																H	11	150	98.9	-	0	0	200I92M58D	RL|S1|R2027974/2	RL|S1|C4952#0
																H	11	150	98.9	-	0	0	203I89M61D	RL|S1|R27183154/1	RL|S1|C4952#0
																H	11	150	98.9	-	0	0	55D95M197I	RL|S1|R23429484/2	RL|S1|C4952#0
																H	11	150	98.9	-	0	0	57D93M199I	RL|S1|R21699475/2	RL|S1|C4952#0
																H	11	150	98.9	-	0	0	57D93M199I	RL|S1|R22541263/1	RL|S1|C4952#0
																H	11	150	98.9	-	0	0	61D89M203I	RL|S1|R4527963/2	RL|S1|C4952#0
																H	11	150	99	+	0	0	187I105M45D	RL|S1|R18768928/2	RL|S1|C4952#0
																H	11	150	99	+	0	0	193I99M51D	RL|S1|R42560855/1	RL|S1|C4952#0
																H	11	150	99	+	0	0	45D105M187I	RL|S1|R32594058/2	RL|S1|C4952#0
																H	11	150	99	-	0	0	187I105M45D	RL|S1|R37071892/1	RL|S1|C4952#0
																H	11	150	99	-	0	0	188I104M46D	RL|S1|R47115113/1	RL|S1|C4952#0
																H	11	150	99	-	0	0	193I99M51D	RL|S1|R16277444/1	RL|S1|C4952#0
																H	11	150	99	-	0	0	195I97M53D	RL|S1|R30440063/1	RL|S1|C4952#0
																H	11	150	99	-	0	0	45D105M187I	RL|S1|R40115236/1	RL|S1|C4952#0
																H	11	150	99	-	0	0	46D104M188I	RL|S1|R1987565/1	RL|S1|C4952#0
																H	11	150	99	-	0	0	54D96M196I	RL|S1|R21103375/1	RL|S1|C4952#0
																H	11	150	99	-	0	0	54D96M196I	RL|S1|R39398349/1	RL|S1|C4952#0
																H	11	150	99.1	+	0	0	178I114M36D	RL|S1|R33045506/1	RL|S1|C4952#0
																H	11	150	99.1	+	0	0	180I112M38D	RL|S1|R36969134/2	RL|S1|C4952#0
																H	11	150	99.1	+	0	0	186I106M44D	RL|S1|R41624959/1	RL|S1|C4952#0
																H	11	150	99.1	+	0	0	41D109M183I	RL|S1|R1282451/2	RL|S1|C4952#0
																H	11	150	99.1	+	0	0	43D107M185I	RL|S1|R24094296/1	RL|S1|C4952#0
																H	11	150	99.1	-	0	0	34D116M176I	RL|S1|R30813502/1	RL|S1|C4952#0
																H	11	150	99.1	-	0	0	40D110M182I	RL|S1|R29206497/1	RL|S1|C4952#0
																H	11	150	99.1	-	0	0	40D110M182I	RL|S1|R36067181/2	RL|S1|C4952#0
																H	11	150	99.1	-	0	0	42D108M184I	RL|S1|R26590515/2	RL|S1|C4952#0
																H	11	150	99.2	+	0	0	166I126M24D	RL|S1|R1734339/1	RL|S1|C4952#0
																H	11	150	99.2	+	0	0	168I124M26D	RL|S1|R4559532/1	RL|S1|C4952#0
																H	11	150	99.2	+	0	0	173I119M31D	RL|S1|R12530844/2	RL|S1|C4952#0
																H	11	150	99.2	+	0	0	29D121M171I	RL|S1|R35134533/1	RL|S1|C4952#0
																H	11	150	99.2	+	0	0	30D120M172I	RL|S1|R42658221/1	RL|S1|C4952#0
																H	11	150	99.2	-	0	0	167I125M25D	RL|S1|R33459899/1	RL|S1|C4952#0
																H	11	150	99.2	-	0	0	168I124M26D	RL|S1|R13580981/1	RL|S1|C4952#0
																H	11	150	99.2	-	0	0	173I119M31D	RL|S1|R1627012/1	RL|S1|C4952#0
																H	11	150	99.2	-	0	0	18D132M160I	RL|S1|R22622604/1	RL|S1|C4952#0
																H	11	150	99.3	+	0	0	104I150M38I	RL|S1|R17426038/1	RL|S1|C4952#0
																H	11	150	99.3	+	0	0	10I150M132I	RL|S1|R40622007/2	RL|S1|C4952#0
																H	11	150	99.3	+	0	0	113I150M29I	RL|S1|R47865643/1	RL|S1|C4952#0
																H	11	150	99.3	+	0	0	116I150M26I	RL|S1|R31487231/1	RL|S1|C4952#0
																H	11	150	99.3	+	0	0	13I150M129I	RL|S1|R13974957/1	RL|S1|C4952#0
																H	11	150	99.3	+	0	0	13I150M129I	RL|S1|R31676984/1	RL|S1|C4952#0
																H	11	150	99.3	+	0	0	148I144M6D	RL|S1|R19298548/1	RL|S1|C4952#0
																H	11	150	99.3	+	0	0	151I141M9D	RL|S1|R4352456/1	RL|S1|C4952#0
																H	11	150	99.3	+	0	0	152I140M10D	RL|S1|R39104073/2	RL|S1|C4952#0
																H	11	150	99.3	+	0	0	2D148M144I	RL|S1|R23725986/1	RL|S1|C4952#0
																H	11	150	99.3	+	0	0	5I150M137I	RL|S1|R18019772/1	RL|S1|C4952#0
																H	11	150	99.3	+	0	0	6I150M136I	RL|S1|R33459899/2	RL|S1|C4952#0
																H	11	150	99.3	+	0	0	82I150M60I	RL|S1|R45705711/1	RL|S1|C4952#0
																H	11	150	99.3	+	0	0	97I150M45I	RL|S1|R22450725/2	RL|S1|C4952#0
																H	11	150	99.3	-	0	0	100I150M42I	RL|S1|R8466063/1	RL|S1|C4952#0
																H	11	150	99.3	-	0	0	11D139M153I	RL|S1|R37153742/1	RL|S1|C4952#0
																H	11	150	99.3	-	0	0	129I150M13I	RL|S1|R49249127/1	RL|S1|C4952#0
																H	11	150	99.3	-	0	0	12D138M154I	RL|S1|R3058751/1	RL|S1|C4952#0
																H	11	150	99.3	-	0	0	130I150M12I	RL|S1|R31676984/2	RL|S1|C4952#0
																H	11	150	99.3	-	0	0	134I150M8I	RL|S1|R22703005/1	RL|S1|C4952#0
																H	11	150	99.3	-	0	0	13D137M155I	RL|S1|R21319988/1	RL|S1|C4952#0
																H	11	150	99.3	-	0	0	141I150MI	RL|S1|R11677734/1	RL|S1|C4952#0
																H	11	150	99.3	-	0	0	150I142M8D	RL|S1|R33408277/1	RL|S1|C4952#0
																H	11	150	99.3	-	0	0	20I150M122I	RL|S1|R23626923/2	RL|S1|C4952#0
																H	11	150	99.3	-	0	0	22I150M120I	RL|S1|R36174435/1	RL|S1|C4952#0
																H	11	150	99.3	-	0	0	33I150M109I	RL|S1|R37956858/1	RL|S1|C4952#0
																H	11	150	99.3	-	0	0	40I150M102I	RL|S1|R42938962/1	RL|S1|C4952#0
																H	11	150	99.3	-	0	0	41I150M101I	RL|S1|R5296915/1	RL|S1|C4952#0
																H	11	150	99.3	-	0	0	47I150M95I	RL|S1|R16513796/1	RL|S1|C4952#0
																H	11	150	99.3	-	0	0	51I150M91I	RL|S1|R29173710/1	RL|S1|C4952#0
																H	11	150	99.3	-	0	0	51I150M91I	RL|S1|R31804651/1	RL|S1|C4952#0
																H	11	150	99.3	-	0	0	51I150M91I	RL|S1|R5080655/1	RL|S1|C4952#0
																H	11	150	99.3	-	0	0	65I150M77I	RL|S1|R37086114/1	RL|S1|C4952#0
																H	11	150	99.3	-	0	0	6I150M136I	RL|S1|R41762824/2	RL|S1|C4952#0
																H	11	150	99.3	-	0	0	6I150M136I	RL|S1|R6910241/1	RL|S1|C4952#0
																H	11	150	99.3	-	0	0	7I150M135I	RL|S1|R42975354/1	RL|S1|C4952#0
																H	11	150	99.3	-	0	0	83I150M59I	RL|S1|R35798375/1	RL|S1|C4952#0
																H	11	150	99.3	-	0	0	94I150M48I	RL|S1|R36672028/1	RL|S1|C4952#0
																H	11	150	99.3	-	0	0	98I150M44I	RL|S1|R43788974/1	RL|S1|C4952#0
																H	12	150	100	+	0	0	160I132M18D	RL|S1|R31286052/1	RL|S1|C6421#0
																H	12	150	100	+	0	0	42I150M100I	RL|S1|R3641066/1	RL|S1|C6421#0
																H	12	150	100	-	0	0	3I150M139I	RL|S1|R8149123/1	RL|S1|C6421#0
																H	12	150	100	-	0	0	52D98M194I	RL|S1|R13074206/1	RL|S1|C6421#0
																H	12	150	100	-	0	0	79I150M63I	RL|S1|R25296223/1	RL|S1|C6421#0
																H	12	150	97	-	0	0	158I134M16D	RL|S1|R3641066/2	RL|S1|C6421#0
																H	12	150	97.2	-	0	0	149I143M7D	RL|S1|R424248/1	RL|S1|C6421#0
																H	12	150	97.3	+	0	0	26I150M116I	RL|S1|R424248/2	RL|S1|C6421#0
																H	12	150	97.3	+	0	0	30I150M112I	RL|S1|R48535299/2	RL|S1|C6421#0
																H	12	150	97.3	+	0	0	84I150M58I	RL|S1|R49595815/2	RL|S1|C6421#0
																H	12	150	97.3	-	0	0	107I150M35I	RL|S1|R43304687/1	RL|S1|C6421#0
																H	12	150	97.4	-	0	0	74D76M216I	RL|S1|R19112229/2	RL|S1|C6421#0
																H	12	150	97.8	+	0	0	12D138M154I	RL|S1|R43304687/2	RL|S1|C6421#0
																H	12	150	98	+	0	0	88I150M54I	RL|S1|R37969461/1	RL|S1|C6421#0
																H	12	150	98.6	-	0	0	154I138M12D	RL|S1|R48535299/1	RL|S1|C6421#0
																H	12	150	98.9	+	0	0	205I87M63D	RL|S1|R4824238/2	RL|S1|C6421#0
																H	12	150	99.3	+	0	0	120I150M22I	RL|S1|R6410291/1	RL|S1|C6421#0
																H	12	150	99.3	+	0	0	156I136M14D	RL|S1|R159064/1	RL|S1|C6421#0
																H	13	150	100	+	0	0	137I150M5I	RL|S1|R31752849/1	RL|S1|C7679#0
																H	13	150	100	+	0	0	145I147M3D	RL|S1|R44182327/1	RL|S1|C7679#0
																H	13	150	100	+	0	0	164I128M22D	RL|S1|R17074823/2	RL|S1|C7679#0
																H	13	150	100	+	0	0	175I117M33D	RL|S1|R6543167/1	RL|S1|C7679#0
																H	13	150	100	+	0	0	190I102M48D	RL|S1|R44035185/1	RL|S1|C7679#0
																H	13	150	100	+	0	0	197I95M55D	RL|S1|R31143810/1	RL|S1|C7679#0
																H	13	150	100	+	0	0	26I150M116I	RL|S1|R32787987/1	RL|S1|C7679#0
																H	13	150	100	+	0	0	33I150M109I	RL|S1|R8098709/1	RL|S1|C7679#0
																H	13	150	100	+	0	0	45D105M187I	RL|S1|R3169156/1	RL|S1|C7679#0
																H	13	150	100	+	0	0	58D92M200I	RL|S1|R10997892/1	RL|S1|C7679#0
																H	13	150	100	-	0	0	10I150M132I	RL|S1|R8879577/1	RL|S1|C7679#0
																H	13	150	100	-	0	0	11I150M131I	RL|S1|R20125898/2	RL|S1|C7679#0
																H	13	150	100	-	0	0	133I150M9I	RL|S1|R37098173/1	RL|S1|C7679#0
																H	13	150	100	-	0	0	16D134M158I	RL|S1|R29716172/1	RL|S1|C7679#0
																H	13	150	100	-	0	0	35D115M177I	RL|S1|R6772131/1	RL|S1|C7679#0
																H	13	150	100	-	0	0	41I150M101I	RL|S1|R15746375/1	RL|S1|C7679#0
																H	13	150	100	-	0	0	49D101M191I	RL|S1|R34129138/1	RL|S1|C7679#0
																H	13	150	100	-	0	0	68D82M210I	RL|S1|R1610831/2	RL|S1|C7679#0
																H	13	150	97	+	0	0	16D134M158I	RL|S1|R41153795/2	RL|S1|C7679#0
																H	13	150	97.1	-	0	0	13D137M155I	RL|S1|R36821358/2	RL|S1|C7679#0
																H	13	150	97.2	+	0	0	151I141M9D	RL|S1|R19257941/1	RL|S1|C7679#0
																H	13	150	97.2	-	0	0	150I142M8D	RL|S1|R22703777/2	RL|S1|C7679#0
																H	13	150	97.2	-	0	0	151I141M9D	RL|S1|R7253516/1	RL|S1|C7679#0
																H	13	150	97.3	+	0	0	106I150M36I	RL|S1|R48771248/1	RL|S1|C7679#0
																H	13	150	97.3	+	0	0	127I150M15I	RL|S1|R26269280/2	RL|S1|C7679#0
																H	13	150	97.3	+	0	0	23I150M119I	RL|S1|R37098173/2	RL|S1|C7679#0
																H	13	150	97.3	+	0	0	47I150M95I	RL|S1|R30178956/2	RL|S1|C7679#0
																H	13	150	97.3	+	0	0	57I150M85I	RL|S1|R44149328/2	RL|S1|C7679#0
																H	13	150	97.3	+	0	0	58I150M84I	RL|S1|R22703777/1	RL|S1|C7679#0
																H	13	150	97.3	+	0	0	5I150M137I	RL|S1|R30055073/1	RL|S1|C7679#0
																H	13	150	97.3	+	0	0	66I150M76I	RL|S1|R11826071/2	RL|S1|C7679#0
																H	13	150	97.3	+	0	0	77I150M65I	RL|S1|R7253516/2	RL|S1|C7679#0
																H	13	150	97.3	+	0	0	88I150M54I	RL|S1|R14542775/2	RL|S1|C7679#0
																H	13	150	97.3	+	0	0	93I150M49I	RL|S1|R2693021/2	RL|S1|C7679#0
																H	13	150	97.3	-	0	0	100I150M42I	RL|S1|R39858873/2	RL|S1|C7679#0
																H	13	150	97.3	-	0	0	120I150M22I	RL|S1|R41153795/1	RL|S1|C7679#0
																H	13	150	97.3	-	0	0	141I150MI	RL|S1|R32787987/2	RL|S1|C7679#0
																H	13	150	97.3	-	0	0	2D148M144I	RL|S1|R9047704/2	RL|S1|C7679#0
																H	13	150	97.3	-	0	0	45I150M97I	RL|S1|R34286731/1	RL|S1|C7679#0
																H	13	150	97.3	-	0	0	48I150M94I	RL|S1|R6450870/1	RL|S1|C7679#0
																H	13	150	97.3	-	0	0	58I150M84I	RL|S1|R12845620/2	RL|S1|C7679#0
																H	13	150	97.4	+	0	0	175I117M33D	RL|S1|R19024896/1	RL|S1|C7679#0
																H	13	150	97.5	+	0	0	31D119M173I	RL|S1|R19068503/2	RL|S1|C7679#0
																H	13	150	97.5	+	0	0	71D79M213I	RL|S1|R25675739/2	RL|S1|C7679#0
																H	13	150	97.5	-	0	0	71D79M213I	RL|S1|R42922353/2	RL|S1|C7679#0
																H	13	150	97.6	+	0	0	166I126M24D	RL|S1|R25655547/1	RL|S1|C7679#0
																H	13	150	97.6	+	0	0	24D126M166I	RL|S1|R47183869/2	RL|S1|C7679#0
																H	13	150	97.6	+	0	0	24D126M166I	RL|S1|R542884/1	RL|S1|C7679#0
																H	13	150	97.6	+	0	0	25D125M167I	RL|S1|R39858873/1	RL|S1|C7679#0
																H	13	150	97.6	+	0	0	65D85M207I	RL|S1|R15746375/2	RL|S1|C7679#0
																H	13	150	97.6	-	0	0	26D124M168I	RL|S1|R48440157/1	RL|S1|C7679#0
																H	13	150	97.6	-	0	0	68D82M210I	RL|S1|R17093644/1	RL|S1|C7679#0
																H	13	150	97.7	+	0	0	63D87M205I	RL|S1|R20285811/1	RL|S1|C7679#0
																H	13	150	97.7	+	0	0	63D87M205I	RL|S1|R33805671/1	RL|S1|C7679#0
																H	13	150	97.7	-	0	0	162I130M20D	RL|S1|R13466285/1	RL|S1|C7679#0
																H	13	150	97.7	-	0	0	17D133M159I	RL|S1|R49259128/2	RL|S1|C7679#0
																H	13	150	97.8	+	0	0	15D135M157I	RL|S1|R42850911/1	RL|S1|C7679#0
																H	13	150	97.8	+	0	0	57D93M199I	RL|S1|R16707331/1	RL|S1|C7679#0
																H	13	150	97.8	+	0	0	57D93M199I	RL|S1|R24437894/2	RL|S1|C7679#0
																H	13	150	97.8	+	0	0	58D92M200I	RL|S1|R44782869/1	RL|S1|C7679#0
																H	13	150	97.8	-	0	0	60D90M202I	RL|S1|R41310312/1	RL|S1|C7679#0
																H	13	150	97.9	+	0	0	4D146M146I	RL|S1|R38919489/2	RL|S1|C7679#0
																H	13	150	97.9	+	0	0	7D143M149I	RL|S1|R26923031/2	RL|S1|C7679#0
																H	13	150	97.9	+	0	0	9D141M151I	RL|S1|R6193689/1	RL|S1|C7679#0
																H	13	150	97.9	-	0	0	148I144M6D	RL|S1|R48757769/1	RL|S1|C7679#0
																H	13	150	98	+	0	0	120I150M22I	RL|S1|R12281148/1	RL|S1|C7679#0
																H	13	150	98	+	0	0	121I150M21I	RL|S1|R15669654/2	RL|S1|C7679#0
																H	13	150	98	+	0	0	121I150M21I	RL|S1|R4748623/2	RL|S1|C7679#0
																H	13	150	98	+	0	0	137I150M5I	RL|S1|R29637426/1	RL|S1|C7679#0
																H	13	150	98	+	0	0	30I150M112I	RL|S1|R11595695/1	RL|S1|C7679#0
																H	13	150	98	+	0	0	32I150M110I	RL|S1|R20520660/2	RL|S1|C7679#0
																H	13	150	98	+	0	0	3I150M139I	RL|S1|R43370772/1	RL|S1|C7679#0
																H	13	150	98	+	0	0	49I150M93I	RL|S1|R32360424/1	RL|S1|C7679#0
																H	13	150	98	+	0	0	49I150M93I	RL|S1|R48757769/2	RL|S1|C7679#0
																H	13	150	98	+	0	0	53I150M89I	RL|S1|R3510878/1	RL|S1|C7679#0
																H	13	150	98	+	0	0	61I150M81I	RL|S1|R37401477/2	RL|S1|C7679#0
																H	13	150	98	+	0	0	80I150M62I	RL|S1|R13908707/1	RL|S1|C7679#0
																H	13	150	98	+	0	0	85I150M57I	RL|S1|R5977845/2	RL|S1|C7679#0
																H	13	150	98	+	0	0	91I150M51I	RL|S1|R13763640/1	RL|S1|C7679#0
																H	13	150	98	+	0	0	96I150M46I	RL|S1|R7808715/1	RL|S1|C7679#0
																H	13	150	98	-	0	0	113I150M29I	RL|S1|R38919489/1	RL|S1|C7679#0
																H	13	150	98	-	0	0	120I150M22I	RL|S1|R26144297/1	RL|S1|C7679#0
																H	13	150	98	-	0	0	126I150M16I	RL|S1|R4826904/2	RL|S1|C7679#0
																H	13	150	98	-	0	0	128I150M14I	RL|S1|R7030614/2	RL|S1|C7679#0
																H	13	150	98	-	0	0	150M142I	RL|S1|R25218775/1	RL|S1|C7679#0
																H	13	150	98	-	0	0	22I150M120I	RL|S1|R21132907/1	RL|S1|C7679#0
																H	13	150	98	-	0	0	29I150M113I	RL|S1|R8921774/2	RL|S1|C7679#0
																H	13	150	98	-	0	0	2I150M140I	RL|S1|R45669198/1	RL|S1|C7679#0
																H	13	150	98	-	0	0	30I150M112I	RL|S1|R47057141/1	RL|S1|C7679#0
																H	13	150	98	-	0	0	33I150M109I	RL|S1|R48082691/1	RL|S1|C7679#0
																H	13	150	98	-	0	0	38I150M104I	RL|S1|R16707331/2	RL|S1|C7679#0
																H	13	150	98	-	0	0	51I150M91I	RL|S1|R6293747/1	RL|S1|C7679#0
																H	13	150	98	-	0	0	52D98M194I	RL|S1|R6097661/1	RL|S1|C7679#0
																H	13	150	98	-	0	0	65I150M77I	RL|S1|R25715544/1	RL|S1|C7679#0
																H	13	150	98	-	0	0	85I150M57I	RL|S1|R262859/2	RL|S1|C7679#0
																H	13	150	98	-	0	0	86I150M56I	RL|S1|R44149328/1	RL|S1|C7679#0
																H	13	150	98.1	+	0	0	42D108M184I	RL|S1|R46190471/1	RL|S1|C7679#0
																H	13	150	98.1	-	0	0	187I105M45D	RL|S1|R11826071/1	RL|S1|C7679#0
																H	13	150	98.2	+	0	0	181I111M39D	RL|S1|R32295730/1	RL|S1|C7679#0
																H	13	150	98.2	+	0	0	37D113M179I	RL|S1|R8920506/2	RL|S1|C7679#0
																H	13	150	98.2	-	0	0	36D114M178I	RL|S1|R16202468/1	RL|S1|C7679#0
																H	13	150	98.3	+	0	0	172I120M30D	RL|S1|R31369728/1	RL|S1|C7679#0
																H	13	150	98.3	+	0	0	176I116M34D	RL|S1|R1218606/2	RL|S1|C7679#0
																H	13	150	98.3	-	0	0	173I119M31D	RL|S1|R14270698/1	RL|S1|C7679#0
																H	13	150	98.3	-	0	0	177I115M35D	RL|S1|R43444877/1	RL|S1|C7679#0
																H	13	150	98.3	-	0	0	35D115M177I	RL|S1|R13016610/2	RL|S1|C7679#0
																H	13	150	98.4	+	0	0	24D126M166I	RL|S1|R46020566/1	RL|S1|C7679#0
																H	13	150	98.4	+	0	0	26D124M168I	RL|S1|R23497752/1	RL|S1|C7679#0
																H	13	150	98.5	+	0	0	15D135M157I	RL|S1|R26144297/2	RL|S1|C7679#0
																H	13	150	98.5	-	0	0	13D137M155I	RL|S1|R33755473/1	RL|S1|C7679#0
																H	13	150	98.6	+	0	0	12D138M154I	RL|S1|R4826904/1	RL|S1|C7679#0
																H	13	150	98.6	+	0	0	4D146M146I	RL|S1|R1666063/1	RL|S1|C7679#0
																H	13	150	98.6	+	0	0	4D146M146I	RL|S1|R2691560/1	RL|S1|C7679#0
																H	13	150	98.6	-	0	0	144I148M2D	RL|S1|R26923031/1	RL|S1|C7679#0
																H	13	150	98.7	+	0	0	115I150M27I	RL|S1|R378589/2	RL|S1|C7679#0
																H	13	150	98.7	+	0	0	120I150M22I	RL|S1|R30216370/1	RL|S1|C7679#0
																H	13	150	98.7	+	0	0	122I150M20I	RL|S1|R33443682/1	RL|S1|C7679#0
																H	13	150	98.7	+	0	0	126I150M16I	RL|S1|R38244469/1	RL|S1|C7679#0
																H	13	150	98.7	+	0	0	32I150M110I	RL|S1|R13466285/2	RL|S1|C7679#0
																H	13	150	98.7	+	0	0	34I150M108I	RL|S1|R14270698/2	RL|S1|C7679#0
																H	13	150	98.7	+	0	0	48I150M94I	RL|S1|R48092316/1	RL|S1|C7679#0
																H	13	150	98.7	+	0	0	54I150M88I	RL|S1|R27962052/1	RL|S1|C7679#0
																H	13	150	98.7	+	0	0	66I150M76I	RL|S1|R43444877/2	RL|S1|C7679#0
																H	13	150	98.7	+	0	0	82I150M60I	RL|S1|R11536636/1	RL|S1|C7679#0
																H	13	150	98.7	-	0	0	100I150M42I	RL|S1|R17310076/1	RL|S1|C7679#0
																H	13	150	98.7	-	0	0	111I150M31I	RL|S1|R30055073/2	RL|S1|C7679#0
																H	13	150	98.7	-	0	0	116I150M26I	RL|S1|R7955568/1	RL|S1|C7679#0
																H	13	150	98.7	-	0	0	124I150M18I	RL|S1|R28407481/1	RL|S1|C7679#0
																H	13	150	98.7	-	0	0	131I150M11I	RL|S1|R36959162/1	RL|S1|C7679#0
																H	13	150	98.7	-	0	0	32I150M110I	RL|S1|R21355995/2	RL|S1|C7679#0
																H	13	150	98.7	-	0	0	34I150M108I	RL|S1|R30473047/1	RL|S1|C7679#0
																H	13	150	98.7	-	0	0	38I150M104I	RL|S1|R47450766/1	RL|S1|C7679#0
																H	13	150	98.7	-	0	0	44I150M98I	RL|S1|R10997892/2	RL|S1|C7679#0
																H	13	150	98.7	-	0	0	4I150M138I	RL|S1|R45756093/1	RL|S1|C7679#0
																H	13	150	98.7	-	0	0	56I150M86I	RL|S1|R27005246/1	RL|S1|C7679#0
																H	13	150	98.7	-	0	0	59I150M83I	RL|S1|R24437894/1	RL|S1|C7679#0
																H	13	150	98.7	-	0	0	63I150M79I	RL|S1|R21016270/1	RL|S1|C7679#0
																H	13	150	98.7	-	0	0	7I150M135I	RL|S1|R23705528/1	RL|S1|C7679#0
																H	13	150	98.7	-	0	0	87I150M55I	RL|S1|R46391909/1	RL|S1|C7679#0
																H	13	150	98.7	-	0	0	D149M143I	RL|S1|R37738635/1	RL|S1|C7679#0
																H	13	150	98.8	-	0	0	70D80M212I	RL|S1|R39747941/2	RL|S1|C7679#0
																H	13	150	99	+	0	0	190I102M48D	RL|S1|R6931673/1	RL|S1|C7679#0
																H	13	150	99	+	0	0	48D102M190I	RL|S1|R262859/1	RL|S1|C7679#0
																H	13	150	99	+	0	0	53D97M195I	RL|S1|R26596484/1	RL|S1|C7679#0
																H	13	150	99	-	0	0	46D104M188I	RL|S1|R4867020/1	RL|S1|C7679#0
																H	13	150	99.1	+	0	0	176I116M34D	RL|S1|R3844413/1	RL|S1|C7679#0
																H	13	150	99.1	+	0	0	178I114M36D	RL|S1|R9239076/1	RL|S1|C7679#0
																H	13	150	99.1	+	0	0	180I112M38D	RL|S1|R28946113/1	RL|S1|C7679#0
																H	13	150	99.1	+	0	0	180I112M38D	RL|S1|R30366126/1	RL|S1|C7679#0
																H	13	150	99.1	-	0	0	180I112M38D	RL|S1|R37401477/1	RL|S1|C7679#0
																H	13	150	99.2	+	0	0	30D120M172I	RL|S1|R47870435/1	RL|S1|C7679#0
																H	13	150	99.2	-	0	0	170I122M28D	RL|S1|R40297359/1	RL|S1|C7679#0
																H	13	150	99.2	-	0	0	19D131M161I	RL|S1|R25096483/2	RL|S1|C7679#0
																H	13	150	99.2	-	0	0	29D121M171I	RL|S1|R3643399/2	RL|S1|C7679#0
																H	13	150	99.3	+	0	0	142I150M	RL|S1|R38227434/1	RL|S1|C7679#0
																H	13	150	99.3	+	0	0	146I146M4D	RL|S1|R25576012/2	RL|S1|C7679#0
																H	13	150	99.3	+	0	0	21I150M121I	RL|S1|R28407481/2	RL|S1|C7679#0
																H	13	150	99.3	+	0	0	28I150M114I	RL|S1|R30617999/1	RL|S1|C7679#0
																H	13	150	99.3	+	0	0	36I150M106I	RL|S1|R3295097/1	RL|S1|C7679#0
																H	13	150	99.3	+	0	0	3D147M145I	RL|S1|R7030614/1	RL|S1|C7679#0
																H	13	150	99.3	+	0	0	40I150M102I	RL|S1|R40297359/2	RL|S1|C7679#0
																H	13	150	99.3	+	0	0	5I150M137I	RL|S1|R22698029/1	RL|S1|C7679#0
																H	13	150	99.3	+	0	0	63I150M79I	RL|S1|R21084158/2	RL|S1|C7679#0
																H	13	150	99.3	-	0	0	104I150M38I	RL|S1|R8461914/1	RL|S1|C7679#0
																H	13	150	99.3	-	0	0	10D140M152I	RL|S1|R2166612/2	RL|S1|C7679#0
																H	13	150	99.3	-	0	0	112I150M30I	RL|S1|R47183869/1	RL|S1|C7679#0
																H	13	150	99.3	-	0	0	124I150M18I	RL|S1|R38597990/1	RL|S1|C7679#0
																H	13	150	99.3	-	0	0	139I150M3I	RL|S1|R19452989/1	RL|S1|C7679#0
																H	13	150	99.3	-	0	0	150I142M8D	RL|S1|R20520660/1	RL|S1|C7679#0
																H	13	150	99.3	-	0	0	27I150M115I	RL|S1|R25675739/1	RL|S1|C7679#0
																H	13	150	99.3	-	0	0	2I150M140I	RL|S1|R18511664/1	RL|S1|C7679#0
																H	13	150	99.3	-	0	0	4D146M146I	RL|S1|R44668548/1	RL|S1|C7679#0
																H	13	150	99.3	-	0	0	53I150M89I	RL|S1|R26858028/1	RL|S1|C7679#0
																H	13	150	99.3	-	0	0	54I150M88I	RL|S1|R25521777/1	RL|S1|C7679#0
																H	13	150	99.3	-	0	0	59I150M83I	RL|S1|R44782869/2	RL|S1|C7679#0
																H	13	150	99.3	-	0	0	74I150M68I	RL|S1|R8920506/1	RL|S1|C7679#0
																H	13	150	99.3	-	0	0	79I150M63I	RL|S1|R30178956/1	RL|S1|C7679#0
																H	13	150	99.3	-	0	0	83I150M59I	RL|S1|R6193689/2	RL|S1|C7679#0
																H	15	150	100	+	0	0	107I150M35I	RL|S1|R36556022/1	RL|S1|C8248#0
																H	15	150	100	+	0	0	109I150M33I	RL|S1|R3702375/1	RL|S1|C8248#0
																H	15	150	100	+	0	0	125I150M17I	RL|S1|R33050229/1	RL|S1|C8248#0
																H	15	150	100	+	0	0	15I150M127I	RL|S1|R4471009/1	RL|S1|C8248#0
																H	15	150	100	+	0	0	179I113M37D	RL|S1|R373621/1	RL|S1|C8248#0
																H	15	150	100	+	0	0	179I113M37D	RL|S1|R47876786/2	RL|S1|C8248#0
																H	15	150	100	+	0	0	189I103M47D	RL|S1|R23067554/1	RL|S1|C8248#0
																H	15	150	100	+	0	0	204I88M62D	RL|S1|R24901309/2	RL|S1|C8248#0
																H	15	150	100	+	0	0	210I82M68D	RL|S1|R38023102/2	RL|S1|C8248#0
																H	15	150	100	+	0	0	214I78M72D	RL|S1|R17124385/1	RL|S1|C8248#0
																H	15	150	100	+	0	0	34I150M108I	RL|S1|R25239997/1	RL|S1|C8248#0
																H	15	150	100	+	0	0	39I150M103I	RL|S1|R34675223/1	RL|S1|C8248#0
																H	15	150	100	+	0	0	45D105M187I	RL|S1|R18111464/2	RL|S1|C8248#0
																H	15	150	100	+	0	0	52I150M90I	RL|S1|R24522394/1	RL|S1|C8248#0
																H	15	150	100	+	0	0	52I150M90I	RL|S1|R24850981/1	RL|S1|C8248#0
																H	15	150	100	+	0	0	5D145M147I	RL|S1|R30437983/1	RL|S1|C8248#0
																H	15	150	100	+	0	0	68D82M210I	RL|S1|R36976340/1	RL|S1|C8248#0
																H	15	150	100	+	0	0	73D77M215I	RL|S1|R38803530/1	RL|S1|C8248#0
																H	15	150	100	+	0	0	73I150M69I	RL|S1|R26876554/1	RL|S1|C8248#0
																H	15	150	100	+	0	0	7D143M149I	RL|S1|R38402826/1	RL|S1|C8248#0
																H	15	150	100	-	0	0	104I150M38I	RL|S1|R22440931/1	RL|S1|C8248#0
																H	15	150	100	-	0	0	136I150M6I	RL|S1|R17701255/1	RL|S1|C8248#0
																H	15	150	100	-	0	0	13I150M129I	RL|S1|R21533927/1	RL|S1|C8248#0
																H	15	150	100	-	0	0	157I135M15D	RL|S1|R14716639/1	RL|S1|C8248#0
																H	15	150	100	-	0	0	165I127M23D	RL|S1|R13163335/1	RL|S1|C8248#0
																H	15	150	100	-	0	0	172I120M30D	RL|S1|R8469089/1	RL|S1|C8248#0
																H	15	150	100	-	0	0	186I106M44D	RL|S1|R28182474/2	RL|S1|C8248#0
																H	15	150	100	-	0	0	211I81M69D	RL|S1|R21792068/1	RL|S1|C8248#0
																H	15	150	100	-	0	0	213I79M71D	RL|S1|R41527389/1	RL|S1|C8248#0
																H	15	150	100	-	0	0	29D121M171I	RL|S1|R21168029/1	RL|S1|C8248#0
																H	15	150	100	-	0	0	33I150M109I	RL|S1|R13285209/1	RL|S1|C8248#0
																H	15	150	100	-	0	0	40D110M182I	RL|S1|R5066483/1	RL|S1|C8248#0
																H	15	150	100	-	0	0	42D108M184I	RL|S1|R16262958/2	RL|S1|C8248#0
																H	15	150	100	-	0	0	47I150M95I	RL|S1|R14288306/1	RL|S1|C8248#0
																H	15	150	100	-	0	0	48D102M190I	RL|S1|R26252922/1	RL|S1|C8248#0
																H	15	150	100	-	0	0	59D91M201I	RL|S1|R23551461/1	RL|S1|C8248#0
																H	15	150	100	-	0	0	59I150M83I	RL|S1|R6693517/1	RL|S1|C8248#0
																H	15	150	100	-	0	0	61D89M203I	RL|S1|R39717616/1	RL|S1|C8248#0
																H	15	150	100	-	0	0	62D88M204I	RL|S1|R27428019/2	RL|S1|C8248#0
																H	15	150	100	-	0	0	64D86M206I	RL|S1|R4740793/1	RL|S1|C8248#0
																H	15	150	100	-	0	0	68I150M74I	RL|S1|R26877383/1	RL|S1|C8248#0
																H	15	150	100	-	0	0	69D81M211I	RL|S1|R8317921/2	RL|S1|C8248#0
																H	15	150	100	-	0	0	72D78M214I	RL|S1|R32143533/1	RL|S1|C8248#0
																H	15	150	100	-	0	0	72I150M70I	RL|S1|R16693225/2	RL|S1|C8248#0
																H	15	150	100	-	0	0	73D77M215I	RL|S1|R9205819/1	RL|S1|C8248#0
																H	15	150	100	-	0	0	73I150M69I	RL|S1|R41321392/2	RL|S1|C8248#0
																H	15	150	100	-	0	0	75D75M217I	RL|S1|R5703339/1	RL|S1|C8248#0
																H	15	150	100	-	0	0	97I150M45I	RL|S1|R5473914/1	RL|S1|C8248#0
																H	15	150	97	+	0	0	191I101M49D	RL|S1|R31040974/2	RL|S1|C8248#0
																H	15	150	97	-	0	0	157I135M15D	RL|S1|R26444865/1	RL|S1|C8248#0
																H	15	150	97	-	0	0	157I135M15D	RL|S1|R7300071/2	RL|S1|C8248#0
																H	15	150	97.1	+	0	0	152I140M10D	RL|S1|R48571046/2	RL|S1|C8248#0
																H	15	150	97.1	+	0	0	153I139M11D	RL|S1|R19535024/1	RL|S1|C8248#0
																H	15	150	97.1	+	0	0	189I103M47D	RL|S1|R40256854/2	RL|S1|C8248#0
																H	15	150	97.1	+	0	0	46D104M188I	RL|S1|R22382128/2	RL|S1|C8248#0
																H	15	150	97.1	+	0	0	47D103M189I	RL|S1|R19854615/2	RL|S1|C8248#0
																H	15	150	97.1	-	0	0	12D138M154I	RL|S1|R23521714/2	RL|S1|C8248#0
																H	15	150	97.2	+	0	0	9D141M151I	RL|S1|R41321392/1	RL|S1|C8248#0
																H	15	150	97.2	-	0	0	41D109M183I	RL|S1|R13946290/2	RL|S1|C8248#0
																H	15	150	97.2	-	0	0	44D106M186I	RL|S1|R12215055/2	RL|S1|C8248#0
																H	15	150	97.3	+	0	0	104I150M38I	RL|S1|R6515897/2	RL|S1|C8248#0
																H	15	150	97.3	+	0	0	106I150M36I	RL|S1|R27530340/1	RL|S1|C8248#0
																H	15	150	97.3	+	0	0	109I150M33I	RL|S1|R32368329/1	RL|S1|C8248#0
																H	15	150	97.3	+	0	0	120I150M22I	RL|S1|R5719752/2	RL|S1|C8248#0
																H	15	150	97.3	+	0	0	129I150M13I	RL|S1|R21556879/2	RL|S1|C8248#0
																H	15	150	97.3	+	0	0	138I150M4I	RL|S1|R31269024/2	RL|S1|C8248#0
																H	15	150	97.3	+	0	0	139I150M3I	RL|S1|R30760800/2	RL|S1|C8248#0
																H	15	150	97.3	+	0	0	182I110M40D	RL|S1|R16882771/2	RL|S1|C8248#0
																H	15	150	97.3	+	0	0	21I150M121I	RL|S1|R3733953/1	RL|S1|C8248#0
																H	15	150	97.3	+	0	0	24I150M118I	RL|S1|R3057755/2	RL|S1|C8248#0
																H	15	150	97.3	+	0	0	28I150M114I	RL|S1|R10854052/1	RL|S1|C8248#0
																H	15	150	97.3	+	0	0	2D148M144I	RL|S1|R25632354/2	RL|S1|C8248#0
																H	15	150	97.3	+	0	0	33I150M109I	RL|S1|R4055209/2	RL|S1|C8248#0
																H	15	150	97.3	+	0	0	39D111M181I	RL|S1|R40276859/2	RL|S1|C8248#0
																H	15	150	97.3	+	0	0	3D147M145I	RL|S1|R16649180/2	RL|S1|C8248#0
																H	15	150	97.3	+	0	0	40I150M102I	RL|S1|R6401916/2	RL|S1|C8248#0
																H	15	150	97.3	+	0	0	41I150M101I	RL|S1|R33572311/2	RL|S1|C8248#0
																H	15	150	97.3	+	0	0	42I150M100I	RL|S1|R11497894/1	RL|S1|C8248#0
																H	15	150	97.3	+	0	0	57I150M85I	RL|S1|R2758177/2	RL|S1|C8248#0
																H	15	150	97.3	+	0	0	64I150M78I	RL|S1|R31428261/1	RL|S1|C8248#0
																H	15	150	97.3	+	0	0	67I150M75I	RL|S1|R3310202/2	RL|S1|C8248#0
																H	15	150	97.3	+	0	0	70I150M72I	RL|S1|R40488586/2	RL|S1|C8248#0
																H	15	150	97.3	+	0	0	75I150M67I	RL|S1|R29376566/1	RL|S1|C8248#0
																H	15	150	97.3	+	0	0	84I150M58I	RL|S1|R13095127/1	RL|S1|C8248#0
																H	15	150	97.3	+	0	0	87I150M55I	RL|S1|R36091327/2	RL|S1|C8248#0
																H	15	150	97.3	+	0	0	92I150M50I	RL|S1|R41527389/2	RL|S1|C8248#0
																H	15	150	97.3	+	0	0	95I150M47I	RL|S1|R19223421/2	RL|S1|C8248#0
																H	15	150	97.3	+	0	0	98I150M44I	RL|S1|R1994223/2	RL|S1|C8248#0
																H	15	150	97.3	-	0	0	106I150M36I	RL|S1|R4471009/2	RL|S1|C8248#0
																H	15	150	97.3	-	0	0	106I150M36I	RL|S1|R49498027/1	RL|S1|C8248#0
																H	15	150	97.3	-	0	0	108I150M34I	RL|S1|R17754325/1	RL|S1|C8248#0
																H	15	150	97.3	-	0	0	111I150M31I	RL|S1|R7393752/2	RL|S1|C8248#0
																H	15	150	97.3	-	0	0	133I150M9I	RL|S1|R12090346/1	RL|S1|C8248#0
																H	15	150	97.3	-	0	0	137I150M5I	RL|S1|R34907305/1	RL|S1|C8248#0
																H	15	150	97.3	-	0	0	139I150M3I	RL|S1|R17778108/2	RL|S1|C8248#0
																H	15	150	97.3	-	0	0	139I150M3I	RL|S1|R41386003/1	RL|S1|C8248#0
																H	15	150	97.3	-	0	0	140I150M2I	RL|S1|R9891215/2	RL|S1|C8248#0
																H	15	150	97.3	-	0	0	141I150MI	RL|S1|R16649180/1	RL|S1|C8248#0
																H	15	150	97.3	-	0	0	3D147M145I	RL|S1|R43119114/2	RL|S1|C8248#0
																H	15	150	97.3	-	0	0	3I150M139I	RL|S1|R31903150/2	RL|S1|C8248#0
																H	15	150	97.3	-	0	0	56I150M86I	RL|S1|R18928914/1	RL|S1|C8248#0
																H	15	150	97.3	-	0	0	71I150M71I	RL|S1|R42850932/2	RL|S1|C8248#0
																H	15	150	97.3	-	0	0	78I150M64I	RL|S1|R32944865/1	RL|S1|C8248#0
																H	15	150	97.3	-	0	0	7I150M135I	RL|S1|R2387201/2	RL|S1|C8248#0
																H	15	150	97.3	-	0	0	81I150M61I	RL|S1|R1102775/1	RL|S1|C8248#0
																H	15	150	97.3	-	0	0	91I150M51I	RL|S1|R9393496/2	RL|S1|C8248#0
																H	15	150	97.3	-	0	0	96I150M46I	RL|S1|R40276859/1	RL|S1|C8248#0
																H	15	150	97.3	-	0	0	9I150M133I	RL|S1|R37237978/1	RL|S1|C8248#0
																H	15	150	97.3	-	0	0	D149M143I	RL|S1|R46663815/2	RL|S1|C8248#0
																H	15	150	97.3	-	0	0	I150M141I	RL|S1|R7316618/1	RL|S1|C8248#0
																H	15	150	97.4	+	0	0	176I116M34D	RL|S1|R18858575/1	RL|S1|C8248#0
																H	15	150	97.4	+	0	0	36D114M178I	RL|S1|R22440931/2	RL|S1|C8248#0
																H	15	150	97.4	+	0	0	36D114M178I	RL|S1|R33143645/2	RL|S1|C8248#0
																H	15	150	97.4	-	0	0	176I116M34D	RL|S1|R46174776/2	RL|S1|C8248#0
																H	15	150	97.4	-	0	0	178I114M36D	RL|S1|R22898010/1	RL|S1|C8248#0
																H	15	150	97.4	-	0	0	214I78M72D	RL|S1|R36429289/2	RL|S1|C8248#0
																H	15	150	97.4	-	0	0	215I77M73D	RL|S1|R24384592/1	RL|S1|C8248#0
																H	15	150	97.4	-	0	0	215I77M73D	RL|S1|R7681970/2	RL|S1|C8248#0
																H	15	150	97.5	+	0	0	213I79M71D	RL|S1|R46023294/1	RL|S1|C8248#0
																H	15	150	97.5	+	0	0	71D79M213I	RL|S1|R24567592/1	RL|S1|C8248#0
																H	15	150	97.5	+	0	0	71D79M213I	RL|S1|R28829104/1	RL|S1|C8248#0
																H	15	150	97.5	-	0	0	28D122M170I	RL|S1|R8890673/1	RL|S1|C8248#0
																H	15	150	97.5	-	0	0	31D119M173I	RL|S1|R49413347/2	RL|S1|C8248#0
																H	15	150	97.5	-	0	0	32D118M174I	RL|S1|R15874036/2	RL|S1|C8248#0
																H	15	150	97.5	-	0	0	70D80M212I	RL|S1|R34384181/2	RL|S1|C8248#0
																H	15	150	97.6	-	0	0	165I127M23D	RL|S1|R5431811/2	RL|S1|C8248#0
																H	15	150	97.6	-	0	0	208I84M66D	RL|S1|R3310202/1	RL|S1|C8248#0
																H	15	150	97.6	-	0	0	209I83M67D	RL|S1|R1952769/1	RL|S1|C8248#0
																H	15	150	97.6	-	0	0	210I82M68D	RL|S1|R26725477/1	RL|S1|C8248#0
																H	15	150	97.6	-	0	0	66D84M208I	RL|S1|R32190069/2	RL|S1|C8248#0
																H	15	150	97.7	+	0	0	18D132M160I	RL|S1|R36265260/2	RL|S1|C8248#0
																H	15	150	97.7	+	0	0	206I86M64D	RL|S1|R36093624/2	RL|S1|C8248#0
																H	15	150	97.7	-	0	0	160I132M18D	RL|S1|R49326793/2	RL|S1|C8248#0
																H	15	150	97.7	-	0	0	18D132M160I	RL|S1|R22971171/1	RL|S1|C8248#0
																H	15	150	97.7	-	0	0	204I88M62D	RL|S1|R36091327/1	RL|S1|C8248#0
																H	15	150	97.7	-	0	0	206I86M64D	RL|S1|R32368329/2	RL|S1|C8248#0
																H	15	150	97.8	+	0	0	13D137M155I	RL|S1|R49353862/2	RL|S1|C8248#0
																H	15	150	97.8	+	0	0	16D134M158I	RL|S1|R9393496/1	RL|S1|C8248#0
																H	15	150	97.8	+	0	0	202I90M60D	RL|S1|R13492258/1	RL|S1|C8248#0
																H	15	150	97.8	+	0	0	57D93M199I	RL|S1|R16390410/1	RL|S1|C8248#0
																H	15	150	97.8	+	0	0	61D89M203I	RL|S1|R36664678/1	RL|S1|C8248#0
																H	15	150	97.8	-	0	0	12D138M154I	RL|S1|R28176959/1	RL|S1|C8248#0
																H	15	150	97.8	-	0	0	14D136M156I	RL|S1|R8016376/1	RL|S1|C8248#0
																H	15	150	97.8	-	0	0	156I136M14D	RL|S1|R19107847/1	RL|S1|C8248#0
																H	15	150	97.9	+	0	0	198I94M56D	RL|S1|R33999428/1	RL|S1|C8248#0
																H	15	150	97.9	+	0	0	54D96M196I	RL|S1|R10347150/1	RL|S1|C8248#0
																H	15	150	97.9	-	0	0	151I141M9D	RL|S1|R43354862/1	RL|S1|C8248#0
																H	15	150	97.9	-	0	0	53D97M195I	RL|S1|R42587906/1	RL|S1|C8248#0
																H	15	150	97.9	-	0	0	55D95M197I	RL|S1|R20109465/1	RL|S1|C8248#0
																H	15	150	98	+	0	0	114I150M28I	RL|S1|R7681970/1	RL|S1|C8248#0
																H	15	150	98	+	0	0	118I150M24I	RL|S1|R16467745/2	RL|S1|C8248#0
																H	15	150	98	+	0	0	121I150M21I	RL|S1|R36467183/2	RL|S1|C8248#0
																H	15	150	98	+	0	0	139I150M3I	RL|S1|R35831590/2	RL|S1|C8248#0
																H	15	150	98	+	0	0	140I150M2I	RL|S1|R14953420/2	RL|S1|C8248#0
																H	15	150	98	+	0	0	141I150MI	RL|S1|R9261358/2	RL|S1|C8248#0
																H	15	150	98	+	0	0	144I148M2D	RL|S1|R3580632/1	RL|S1|C8248#0
																H	15	150	98	+	0	0	145I147M3D	RL|S1|R24592740/1	RL|S1|C8248#0
																H	15	150	98	+	0	0	18I150M124I	RL|S1|R34823264/2	RL|S1|C8248#0
																H	15	150	98	+	0	0	191I101M49D	RL|S1|R34413118/1	RL|S1|C8248#0
																H	15	150	98	+	0	0	193I99M51D	RL|S1|R3108270/1	RL|S1|C8248#0
																H	15	150	98	+	0	0	23I150M119I	RL|S1|R23493468/1	RL|S1|C8248#0
																H	15	150	98	+	0	0	24I150M118I	RL|S1|R17701255/2	RL|S1|C8248#0
																H	15	150	98	+	0	0	30I150M112I	RL|S1|R28182474/1	RL|S1|C8248#0
																H	15	150	98	+	0	0	38I150M104I	RL|S1|R35450955/1	RL|S1|C8248#0
																H	15	150	98	+	0	0	49I150M93I	RL|S1|R14716639/2	RL|S1|C8248#0
																H	15	150	98	+	0	0	49I150M93I	RL|S1|R31680569/1	RL|S1|C8248#0
																H	15	150	98	+	0	0	52I150M90I	RL|S1|R1952769/2	RL|S1|C8248#0
																H	15	150	98	+	0	0	52I150M90I	RL|S1|R24760986/2	RL|S1|C8248#0
																H	15	150	98	+	0	0	52I150M90I	RL|S1|R49124733/1	RL|S1|C8248#0
																H	15	150	98	+	0	0	53I150M89I	RL|S1|R36671141/2	RL|S1|C8248#0
																H	15	150	98	+	0	0	58I150M84I	RL|S1|R3929247/2	RL|S1|C8248#0
																H	15	150	98	+	0	0	58I150M84I	RL|S1|R49475761/2	RL|S1|C8248#0
																H	15	150	98	+	0	0	61I150M81I	RL|S1|R21661548/1	RL|S1|C8248#0
																H	15	150	98	+	0	0	71I150M71I	RL|S1|R27149138/2	RL|S1|C8248#0
																H	15	150	98	+	0	0	78I150M64I	RL|S1|R44275759/1	RL|S1|C8248#0
																H	15	150	98	+	0	0	80I150M62I	RL|S1|R13163335/2	RL|S1|C8248#0
																H	15	150	98	+	0	0	87I150M55I	RL|S1|R23407539/1	RL|S1|C8248#0
																H	15	150	98	+	0	0	89I150M53I	RL|S1|R20191375/2	RL|S1|C8248#0
																H	15	150	98	-	0	0	103I150M39I	RL|S1|R22988785/2	RL|S1|C8248#0
																H	15	150	98	-	0	0	111I150M31I	RL|S1|R16206004/2	RL|S1|C8248#0
																H	15	150	98	-	0	0	115I150M27I	RL|S1|R38347730/1	RL|S1|C8248#0
																H	15	150	98	-	0	0	134I150M8I	RL|S1|R1418460/1	RL|S1|C8248#0
																H	15	150	98	-	0	0	135I150M7I	RL|S1|R6515897/1	RL|S1|C8248#0
																H	15	150	98	-	0	0	141I150MI	RL|S1|R39226023/2	RL|S1|C8248#0
																H	15	150	98	-	0	0	142I150M	RL|S1|R23382206/2	RL|S1|C8248#0
																H	15	150	98	-	0	0	142I150M	RL|S1|R5742292/1	RL|S1|C8248#0
																H	15	150	98	-	0	0	14I150M128I	RL|S1|R14839622/2	RL|S1|C8248#0
																H	15	150	98	-	0	0	15I150M127I	RL|S1|R17876957/1	RL|S1|C8248#0
																H	15	150	98	-	0	0	190I102M48D	RL|S1|R13095127/2	RL|S1|C8248#0
																H	15	150	98	-	0	0	191I101M49D	RL|S1|R4801575/1	RL|S1|C8248#0
																H	15	150	98	-	0	0	21I150M121I	RL|S1|R33144937/1	RL|S1|C8248#0
																H	15	150	98	-	0	0	22I150M120I	RL|S1|R2052479/2	RL|S1|C8248#0
																H	15	150	98	-	0	0	34I150M108I	RL|S1|R45647907/1	RL|S1|C8248#0
																H	15	150	98	-	0	0	36I150M106I	RL|S1|R24567592/2	RL|S1|C8248#0
																H	15	150	98	-	0	0	37I150M105I	RL|S1|R23126350/1	RL|S1|C8248#0
																H	15	150	98	-	0	0	3D147M145I	RL|S1|R22556537/1	RL|S1|C8248#0
																H	15	150	98	-	0	0	3D147M145I	RL|S1|R32024936/1	RL|S1|C8248#0
																H	15	150	98	-	0	0	46I150M96I	RL|S1|R39534675/2	RL|S1|C8248#0
																H	15	150	98	-	0	0	48D102M190I	RL|S1|R24477549/1	RL|S1|C8248#0
																H	15	150	98	-	0	0	49I150M93I	RL|S1|R3193083/2	RL|S1|C8248#0
																H	15	150	98	-	0	0	50I150M92I	RL|S1|R40786687/2	RL|S1|C8248#0
																H	15	150	98	-	0	0	52I150M90I	RL|S1|R21691148/2	RL|S1|C8248#0
																H	15	150	98	-	0	0	66I150M76I	RL|S1|R33143645/1	RL|S1|C8248#0
																H	15	150	98	-	0	0	70I150M72I	RL|S1|R36265260/1	RL|S1|C8248#0
																H	15	150	98	-	0	0	85I150M57I	RL|S1|R43669368/1	RL|S1|C8248#0
																H	15	150	98	-	0	0	86I150M56I	RL|S1|R23207934/1	RL|S1|C8248#0
																H	15	150	98	-	0	0	96I150M46I	RL|S1|R34823264/1	RL|S1|C8248#0
																H	15	150	98	-	0	0	I150M141I	RL|S1|R26743186/1	RL|S1|C8248#0
																H	15	150	98.1	+	0	0	186I106M44D	RL|S1|R31829899/1	RL|S1|C8248#0
																H	15	150	98.1	-	0	0	185I107M43D	RL|S1|R17527808/2	RL|S1|C8248#0
																H	15	150	98.1	-	0	0	187I105M45D	RL|S1|R49475761/1	RL|S1|C8248#0
																H	15	150	98.1	-	0	0	47D103M189I	RL|S1|R6312272/2	RL|S1|C8248#0
																H	15	150	98.2	+	0	0	182I110M40D	RL|S1|R45836844/2	RL|S1|C8248#0
																H	15	150	98.2	+	0	0	183I109M41D	RL|S1|R689454/1	RL|S1|C8248#0
																H	15	150	98.2	+	0	0	37D113M179I	RL|S1|R7393752/1	RL|S1|C8248#0
																H	15	150	98.2	+	0	0	40D110M182I	RL|S1|R35739569/1	RL|S1|C8248#0
																H	15	150	98.2	-	0	0	178I114M36D	RL|S1|R16565207/2	RL|S1|C8248#0
																H	15	150	98.2	-	0	0	178I114M36D	RL|S1|R3929247/1	RL|S1|C8248#0
																H	15	150	98.2	-	0	0	179I113M37D	RL|S1|R405464/1	RL|S1|C8248#0
																H	15	150	98.3	+	0	0	172I120M30D	RL|S1|R30084910/1	RL|S1|C8248#0
																H	15	150	98.3	+	0	0	31D119M173I	RL|S1|R3193083/1	RL|S1|C8248#0
																H	15	150	98.3	+	0	0	33D117M175I	RL|S1|R23736876/1	RL|S1|C8248#0
																H	15	150	98.3	-	0	0	175I117M33D	RL|S1|R42080257/1	RL|S1|C8248#0
																H	15	150	98.3	-	0	0	177I115M35D	RL|S1|R11991057/1	RL|S1|C8248#0
																H	15	150	98.3	-	0	0	177I115M35D	RL|S1|R46528607/1	RL|S1|C8248#0
																H	15	150	98.3	-	0	0	30D120M172I	RL|S1|R15934603/2	RL|S1|C8248#0
																H	15	150	98.3	-	0	0	30D120M172I	RL|S1|R18271212/1	RL|S1|C8248#0
																H	15	150	98.3	-	0	0	35D115M177I	RL|S1|R22953946/1	RL|S1|C8248#0
																H	15	150	98.4	+	0	0	168I124M26D	RL|S1|R49014542/1	RL|S1|C8248#0
																H	15	150	98.4	+	0	0	21D129M163I	RL|S1|R16693225/1	RL|S1|C8248#0
																H	15	150	98.4	+	0	0	26D124M168I	RL|S1|R23207934/2	RL|S1|C8248#0
																H	15	150	98.4	-	0	0	165I127M23D	RL|S1|R3057755/1	RL|S1|C8248#0
																H	15	150	98.4	-	0	0	26D124M168I	RL|S1|R42760751/1	RL|S1|C8248#0
																H	15	150	98.5	+	0	0	156I136M14D	RL|S1|R45853453/2	RL|S1|C8248#0
																H	15	150	98.5	+	0	0	20D130M162I	RL|S1|R23272534/1	RL|S1|C8248#0
																H	15	150	98.5	-	0	0	156I136M14D	RL|S1|R25442712/1	RL|S1|C8248#0
																H	15	150	98.5	-	0	0	159I133M17D	RL|S1|R6401916/1	RL|S1|C8248#0
																H	15	150	98.6	+	0	0	145I147M3D	RL|S1|R26796280/1	RL|S1|C8248#0
																H	15	150	98.6	+	0	0	153I139M11D	RL|S1|R36784100/1	RL|S1|C8248#0
																H	15	150	98.6	+	0	0	9D141M151I	RL|S1|R48580797/1	RL|S1|C8248#0
																H	15	150	98.6	-	0	0	146I146M4D	RL|S1|R10646497/2	RL|S1|C8248#0
																H	15	150	98.6	-	0	0	153I139M11D	RL|S1|R1406277/1	RL|S1|C8248#0
																H	15	150	98.6	-	0	0	153I139M11D	RL|S1|R31321221/1	RL|S1|C8248#0
																H	15	150	98.6	-	0	0	4D146M146I	RL|S1|R21125555/1	RL|S1|C8248#0
																H	15	150	98.6	-	0	0	6D144M148I	RL|S1|R46432038/2	RL|S1|C8248#0
																H	15	150	98.6	-	0	0	7D143M149I	RL|S1|R42621194/1	RL|S1|C8248#0
																H	15	150	98.6	-	0	0	8D142M150I	RL|S1|R45373898/1	RL|S1|C8248#0
																H	15	150	98.7	+	0	0	100I150M42I	RL|S1|R35584431/1	RL|S1|C8248#0
																H	15	150	98.7	+	0	0	102I150M40I	RL|S1|R40368404/1	RL|S1|C8248#0
																H	15	150	98.7	+	0	0	113I150M29I	RL|S1|R4712145/1	RL|S1|C8248#0
																H	15	150	98.7	+	0	0	121I150M21I	RL|S1|R25889493/2	RL|S1|C8248#0
																H	15	150	98.7	+	0	0	136I150M6I	RL|S1|R37522296/1	RL|S1|C8248#0
																H	15	150	98.7	+	0	0	137I150M5I	RL|S1|R24383037/1	RL|S1|C8248#0
																H	15	150	98.7	+	0	0	139I150M3I	RL|S1|R43839251/1	RL|S1|C8248#0
																H	15	150	98.7	+	0	0	16I150M126I	RL|S1|R37831625/1	RL|S1|C8248#0
																H	15	150	98.7	+	0	0	17I150M125I	RL|S1|R27605827/1	RL|S1|C8248#0
																H	15	150	98.7	+	0	0	214I78M72D	RL|S1|R7180562/1	RL|S1|C8248#0
																H	15	150	98.7	+	0	0	215I77M73D	RL|S1|R31400269/1	RL|S1|C8248#0
																H	15	150	98.7	+	0	0	26I150M116I	RL|S1|R10646497/1	RL|S1|C8248#0
																H	15	150	98.7	+	0	0	27I150M115I	RL|S1|R16565207/1	RL|S1|C8248#0
																H	15	150	98.7	+	0	0	2I150M140I	RL|S1|R40461300/1	RL|S1|C8248#0
																H	15	150	98.7	+	0	0	2I150M140I	RL|S1|R46318283/1	RL|S1|C8248#0
																H	15	150	98.7	+	0	0	31I150M111I	RL|S1|R30563259/1	RL|S1|C8248#0
																H	15	150	98.7	+	0	0	31I150M111I	RL|S1|R40070542/1	RL|S1|C8248#0
																H	15	150	98.7	+	0	0	40I150M102I	RL|S1|R21156720/2	RL|S1|C8248#0
																H	15	150	98.7	+	0	0	49I150M93I	RL|S1|R16033645/2	RL|S1|C8248#0
																H	15	150	98.7	+	0	0	4I150M138I	RL|S1|R17754325/2	RL|S1|C8248#0
																H	15	150	98.7	+	0	0	55I150M87I	RL|S1|R23382206/1	RL|S1|C8248#0
																H	15	150	98.7	+	0	0	57I150M85I	RL|S1|R13540736/1	RL|S1|C8248#0
																H	15	150	98.7	+	0	0	61I150M81I	RL|S1|R28949352/1	RL|S1|C8248#0
																H	15	150	98.7	+	0	0	62I150M80I	RL|S1|R46174776/1	RL|S1|C8248#0
																H	15	150	98.7	+	0	0	67I150M75I	RL|S1|R14822332/1	RL|S1|C8248#0
																H	15	150	98.7	+	0	0	68I150M74I	RL|S1|R42080257/2	RL|S1|C8248#0
																H	15	150	98.7	+	0	0	6I150M136I	RL|S1|R27570195/1	RL|S1|C8248#0
																H	15	150	98.7	+	0	0	75I150M67I	RL|S1|R13333739/2	RL|S1|C8248#0
																H	15	150	98.7	+	0	0	80I150M62I	RL|S1|R12648939/1	RL|S1|C8248#0
																H	15	150	98.7	+	0	0	94I150M48I	RL|S1|R5431811/1	RL|S1|C8248#0
																H	15	150	98.7	+	0	0	98I150M44I	RL|S1|R25363106/1	RL|S1|C8248#0
																H	15	150	98.7	-	0	0	100I150M42I	RL|S1|R37628686/1	RL|S1|C8248#0
																H	15	150	98.7	-	0	0	120I150M22I	RL|S1|R7314701/1	RL|S1|C8248#0
																H	15	150	98.7	-	0	0	12I150M130I	RL|S1|R32459830/2	RL|S1|C8248#0
																H	15	150	98.7	-	0	0	136I150M6I	RL|S1|R4055209/1	RL|S1|C8248#0
																H	15	150	98.7	-	0	0	14I150M128I	RL|S1|R19221884/1	RL|S1|C8248#0
																H	15	150	98.7	-	0	0	150M142I	RL|S1|R30567992/1	RL|S1|C8248#0
																H	15	150	98.7	-	0	0	20I150M122I	RL|S1|R18156139/1	RL|S1|C8248#0
																H	15	150	98.7	-	0	0	22I150M120I	RL|S1|R33290704/1	RL|S1|C8248#0
																H	15	150	98.7	-	0	0	23I150M119I	RL|S1|R21281913/2	RL|S1|C8248#0
																H	15	150	98.7	-	0	0	24I150M118I	RL|S1|R11137455/1	RL|S1|C8248#0
																H	15	150	98.7	-	0	0	26I150M116I	RL|S1|R20973484/2	RL|S1|C8248#0
																H	15	150	98.7	-	0	0	2I150M140I	RL|S1|R13928475/2	RL|S1|C8248#0
																H	15	150	98.7	-	0	0	34I150M108I	RL|S1|R8605039/2	RL|S1|C8248#0
																H	15	150	98.7	-	0	0	42I150M100I	RL|S1|R43931391/1	RL|S1|C8248#0
																H	15	150	98.7	-	0	0	48I150M94I	RL|S1|R209485/2	RL|S1|C8248#0
																H	15	150	98.7	-	0	0	5I150M137I	RL|S1|R2729021/2	RL|S1|C8248#0
																H	15	150	98.7	-	0	0	5I150M137I	RL|S1|R33516277/2	RL|S1|C8248#0
																H	15	150	98.7	-	0	0	60I150M82I	RL|S1|R46523923/1	RL|S1|C8248#0
																H	15	150	98.7	-	0	0	61I150M81I	RL|S1|R18111464/1	RL|S1|C8248#0
																H	15	150	98.7	-	0	0	73I150M69I	RL|S1|R14088548/1	RL|S1|C8248#0
																H	15	150	98.7	-	0	0	81I150M61I	RL|S1|R49353862/1	RL|S1|C8248#0
																H	15	150	98.7	-	0	0	85I150M57I	RL|S1|R3044303/1	RL|S1|C8248#0
																H	15	150	98.7	-	0	0	86I150M56I	RL|S1|R22382128/1	RL|S1|C8248#0
																H	15	150	98.7	-	0	0	87I150M55I	RL|S1|R22746803/2	RL|S1|C8248#0
																H	15	150	98.7	-	0	0	87I150M55I	RL|S1|R48580797/2	RL|S1|C8248#0
																H	15	150	98.7	-	0	0	91I150M51I	RL|S1|R18227059/1	RL|S1|C8248#0
																H	15	150	98.7	-	0	0	94I150M48I	RL|S1|R16390410/2	RL|S1|C8248#0
																H	15	150	98.7	-	0	0	95I150M47I	RL|S1|R35570325/1	RL|S1|C8248#0
																H	15	150	98.8	+	0	0	206I86M64D	RL|S1|R14350981/2	RL|S1|C8248#0
																H	15	150	98.8	+	0	0	210I82M68D	RL|S1|R9964719/1	RL|S1|C8248#0
																H	15	150	98.8	+	0	0	66D84M208I	RL|S1|R49841238/1	RL|S1|C8248#0
																H	15	150	98.8	+	0	0	67D83M209I	RL|S1|R5452980/1	RL|S1|C8248#0
																H	15	150	98.8	-	0	0	211I81M69D	RL|S1|R12612525/1	RL|S1|C8248#0
																H	15	150	98.8	-	0	0	65D85M207I	RL|S1|R41098096/2	RL|S1|C8248#0
																H	15	150	98.8	-	0	0	67D83M209I	RL|S1|R6595850/1	RL|S1|C8248#0
																H	15	150	98.9	+	0	0	197I95M55D	RL|S1|R49270273/2	RL|S1|C8248#0
																H	15	150	98.9	+	0	0	199I93M57D	RL|S1|R48780000/1	RL|S1|C8248#0
																H	15	150	98.9	+	0	0	199I93M57D	RL|S1|R49840208/1	RL|S1|C8248#0
																H	15	150	98.9	+	0	0	200I92M58D	RL|S1|R7473942/1	RL|S1|C8248#0
																H	15	150	98.9	+	0	0	203I89M61D	RL|S1|R28020595/1	RL|S1|C8248#0
																H	15	150	98.9	+	0	0	203I89M61D	RL|S1|R38430088/1	RL|S1|C8248#0
																H	15	150	98.9	-	0	0	199I93M57D	RL|S1|R13333739/1	RL|S1|C8248#0
																H	15	150	98.9	-	0	0	199I93M57D	RL|S1|R22064009/1	RL|S1|C8248#0
																H	15	150	98.9	-	0	0	200I92M58D	RL|S1|R21166612/1	RL|S1|C8248#0
																H	15	150	98.9	-	0	0	58D92M200I	RL|S1|R41160631/1	RL|S1|C8248#0
																H	15	150	98.9	-	0	0	62D88M204I	RL|S1|R12946089/1	RL|S1|C8248#0
																H	15	150	99	+	0	0	187I105M45D	RL|S1|R15721825/1	RL|S1|C8248#0
																H	15	150	99	+	0	0	187I105M45D	RL|S1|R32512327/1	RL|S1|C8248#0
																H	15	150	99	+	0	0	187I105M45D	RL|S1|R8643358/2	RL|S1|C8248#0
																H	15	150	99	+	0	0	48D102M190I	RL|S1|R22988785/1	RL|S1|C8248#0
																H	15	150	99	-	0	0	191I101M49D	RL|S1|R24760986/1	RL|S1|C8248#0
																H	15	150	99	-	0	0	47D103M189I	RL|S1|R2282007/1	RL|S1|C8248#0
																H	15	150	99	-	0	0	53D97M195I	RL|S1|R40740730/2	RL|S1|C8248#0
																H	15	150	99.1	+	0	0	175I117M33D	RL|S1|R36226690/1	RL|S1|C8248#0
																H	15	150	99.1	+	0	0	176I116M34D	RL|S1|R26284021/1	RL|S1|C8248#0
																H	15	150	99.1	+	0	0	33D117M175I	RL|S1|R38347730/2	RL|S1|C8248#0
																H	15	150	99.1	+	0	0	34D116M176I	RL|S1|R35803694/1	RL|S1|C8248#0
																H	15	150	99.1	+	0	0	44D106M186I	RL|S1|R34594149/1	RL|S1|C8248#0
																H	15	150	99.1	-	0	0	183I109M41D	RL|S1|R36671141/1	RL|S1|C8248#0
																H	15	150	99.1	-	0	0	183I109M41D	RL|S1|R5196566/1	RL|S1|C8248#0
																H	15	150	99.1	-	0	0	184I108M42D	RL|S1|R40488586/1	RL|S1|C8248#0
																H	15	150	99.1	-	0	0	37D113M179I	RL|S1|R19658453/2	RL|S1|C8248#0
																H	15	150	99.1	-	0	0	39D111M181I	RL|S1|R34356673/2	RL|S1|C8248#0
																H	15	150	99.2	+	0	0	159I133M17D	RL|S1|R5498700/1	RL|S1|C8248#0
																H	15	150	99.2	+	0	0	160I132M18D	RL|S1|R4981637/1	RL|S1|C8248#0
																H	15	150	99.2	+	0	0	163I129M21D	RL|S1|R36310547/1	RL|S1|C8248#0
																H	15	150	99.2	+	0	0	166I126M24D	RL|S1|R33960977/1	RL|S1|C8248#0
																H	15	150	99.2	+	0	0	166I126M24D	RL|S1|R828122/1	RL|S1|C8248#0
																H	15	150	99.2	+	0	0	168I124M26D	RL|S1|R41797497/1	RL|S1|C8248#0
																H	15	150	99.2	+	0	0	20D130M162I	RL|S1|R29281984/1	RL|S1|C8248#0
																H	15	150	99.2	+	0	0	30D120M172I	RL|S1|R16206004/1	RL|S1|C8248#0
																H	15	150	99.2	-	0	0	165I127M23D	RL|S1|R40435313/1	RL|S1|C8248#0
																H	15	150	99.2	-	0	0	172I120M30D	RL|S1|R18220001/1	RL|S1|C8248#0
																H	15	150	99.3	+	0	0	107I150M35I	RL|S1|R48353565/1	RL|S1|C8248#0
																H	15	150	99.3	+	0	0	109I150M33I	RL|S1|R94311/1	RL|S1|C8248#0
																H	15	150	99.3	+	0	0	10D140M152I	RL|S1|R42850932/1	RL|S1|C8248#0
																H	15	150	99.3	+	0	0	122I150M20I	RL|S1|R18260884/1	RL|S1|C8248#0
																H	15	150	99.3	+	0	0	123I150M19I	RL|S1|R28780071/1	RL|S1|C8248#0
																H	15	150	99.3	+	0	0	124I150M18I	RL|S1|R29439842/1	RL|S1|C8248#0
																H	15	150	99.3	+	0	0	135I150M7I	RL|S1|R10954327/2	RL|S1|C8248#0
																H	15	150	99.3	+	0	0	143I149MD	RL|S1|R770130/1	RL|S1|C8248#0
																H	15	150	99.3	+	0	0	14D136M156I	RL|S1|R18316262/2	RL|S1|C8248#0
																H	15	150	99.3	+	0	0	154I138M12D	RL|S1|R10116149/1	RL|S1|C8248#0
																H	15	150	99.3	+	0	0	16I150M126I	RL|S1|R44580919/1	RL|S1|C8248#0
																H	15	150	99.3	+	0	0	27I150M115I	RL|S1|R12090346/2	RL|S1|C8248#0
																H	15	150	99.3	+	0	0	35I150M107I	RL|S1|R9891215/1	RL|S1|C8248#0
																H	15	150	99.3	+	0	0	46I150M96I	RL|S1|R7300071/1	RL|S1|C8248#0
																H	15	150	99.3	+	0	0	51I150M91I	RL|S1|R17527808/1	RL|S1|C8248#0
																H	15	150	99.3	+	0	0	53I150M89I	RL|S1|R27945066/1	RL|S1|C8248#0
																H	15	150	99.3	+	0	0	58I150M84I	RL|S1|R39226023/1	RL|S1|C8248#0
																H	15	150	99.3	+	0	0	5I150M137I	RL|S1|R42854338/1	RL|S1|C8248#0
																H	15	150	99.3	+	0	0	70I150M72I	RL|S1|R24217295/1	RL|S1|C8248#0
																H	15	150	99.3	+	0	0	75I150M67I	RL|S1|R46528607/2	RL|S1|C8248#0
																H	15	150	99.3	+	0	0	77I150M65I	RL|S1|R19962169/1	RL|S1|C8248#0
																H	15	150	99.3	+	0	0	77I150M65I	RL|S1|R38118177/1	RL|S1|C8248#0
																H	15	150	99.3	+	0	0	90I150M52I	RL|S1|R401889/1	RL|S1|C8248#0
																H	15	150	99.3	+	0	0	94I150M48I	RL|S1|R36429289/1	RL|S1|C8248#0
																H	15	150	99.3	-	0	0	108I150M34I	RL|S1|R18316262/1	RL|S1|C8248#0
																H	15	150	99.3	-	0	0	115I150M27I	RL|S1|R25632354/1	RL|S1|C8248#0
																H	15	150	99.3	-	0	0	116I150M26I	RL|S1|R34399690/1	RL|S1|C8248#0
																H	15	150	99.3	-	0	0	126I150M16I	RL|S1|R27605827/2	RL|S1|C8248#0
																H	15	150	99.3	-	0	0	141I150MI	RL|S1|R24850981/2	RL|S1|C8248#0
																H	15	150	99.3	-	0	0	147I145M5D	RL|S1|R15520341/1	RL|S1|C8248#0
																H	15	150	99.3	-	0	0	40I150M102I	RL|S1|R12706498/1	RL|S1|C8248#0
																H	15	150	99.3	-	0	0	49I150M93I	RL|S1|R35739569/2	RL|S1|C8248#0
																H	15	150	99.3	-	0	0	4I150M138I	RL|S1|R39049776/2	RL|S1|C8248#0
																H	15	150	99.3	-	0	0	59I150M83I	RL|S1|R47584552/1	RL|S1|C8248#0
																H	15	150	99.3	-	0	0	66I150M76I	RL|S1|R48646003/1	RL|S1|C8248#0
																H	15	150	99.3	-	0	0	80I150M62I	RL|S1|R12484732/1	RL|S1|C8248#0
																H	15	150	99.3	-	0	0	80I150M62I	RL|S1|R22837989/1	RL|S1|C8248#0
																H	15	150	99.3	-	0	0	83I150M59I	RL|S1|R19282794/1	RL|S1|C8248#0
																H	15	150	99.3	-	0	0	D149M143I	RL|S1|R38803530/2	RL|S1|C8248#0
																H	18	150	100	+	0	0	200I92M58D	RL|S1|R42423746/1	RL|S1|C9292#0
																H	18	150	100	+	0	0	204I88M62D	RL|S1|R43335037/1	RL|S1|C9292#0
																H	18	150	100	+	0	0	212I80M70D	RL|S1|R39207293/2	RL|S1|C9292#0
																H	18	150	100	+	0	0	217I75M75D	RL|S1|R21903957/2	RL|S1|C9292#0
																H	18	150	100	+	0	0	81I150M61I	RL|S1|R27190098/1	RL|S1|C9292#0
																H	18	150	100	-	0	0	215I77M73D	RL|S1|R3235930/1	RL|S1|C9292#0
																H	18	150	100	-	0	0	29D121M171I	RL|S1|R48886478/2	RL|S1|C9292#0
																H	18	150	100	-	0	0	56D94M198I	RL|S1|R32839349/1	RL|S1|C9292#0
																H	18	150	100	-	0	0	67D83M209I	RL|S1|R19154991/1	RL|S1|C9292#0
																H	18	150	97.1	+	0	0	153I139M11D	RL|S1|R30005960/1	RL|S1|C9292#0
																H	18	150	97.2	-	0	0	147I145M5D	RL|S1|R48616463/1	RL|S1|C9292#0
																H	18	150	97.2	-	0	0	148I144M6D	RL|S1|R16640065/2	RL|S1|C9292#0
																H	18	150	97.3	+	0	0	130I150M12I	RL|S1|R10769477/2	RL|S1|C9292#0
																H	18	150	97.3	+	0	0	27I150M115I	RL|S1|R27286614/2	RL|S1|C9292#0
																H	18	150	97.3	+	0	0	68I150M74I	RL|S1|R18439289/2	RL|S1|C9292#0
																H	18	150	97.3	-	0	0	217I75M75D	RL|S1|R4903942/1	RL|S1|C9292#0
																H	18	150	97.3	-	0	0	217I75M75D	RL|S1|R49423911/1	RL|S1|C9292#0
																H	18	150	97.3	-	0	0	27I150M115I	RL|S1|R47934912/1	RL|S1|C9292#0
																H	18	150	97.3	-	0	0	55I150M87I	RL|S1|R11726997/2	RL|S1|C9292#0
																H	18	150	97.3	-	0	0	68I150M74I	RL|S1|R5802760/2	RL|S1|C9292#0
																H	18	150	97.4	+	0	0	215I77M73D	RL|S1|R30332979/2	RL|S1|C9292#0
																H	18	150	97.4	+	0	0	216I76M74D	RL|S1|R40546928/1	RL|S1|C9292#0
																H	18	150	97.4	-	0	0	215I77M73D	RL|S1|R29233419/2	RL|S1|C9292#0
																H	18	150	97.5	+	0	0	212I80M70D	RL|S1|R10605279/1	RL|S1|C9292#0
																H	18	150	97.5	-	0	0	212I80M70D	RL|S1|R3702010/1	RL|S1|C9292#0
																H	18	150	97.6	-	0	0	208I84M66D	RL|S1|R2207522/2	RL|S1|C9292#0
																H	18	150	98	+	0	0	106I150M36I	RL|S1|R14561934/2	RL|S1|C9292#0
																H	18	150	98	+	0	0	25I150M117I	RL|S1|R29750999/1	RL|S1|C9292#0
																H	18	150	98	+	0	0	49D101M191I	RL|S1|R5802760/1	RL|S1|C9292#0
																H	18	150	98	-	0	0	108I150M34I	RL|S1|R14925390/2	RL|S1|C9292#0
																H	18	150	98	-	0	0	119I150M23I	RL|S1|R19971178/1	RL|S1|C9292#0
																H	18	150	98.1	-	0	0	42D108M184I	RL|S1|R7594550/1	RL|S1|C9292#0
																H	18	150	98.2	+	0	0	179I113M37D	RL|S1|R44271353/2	RL|S1|C9292#0
																H	18	150	98.3	+	0	0	172I120M30D	RL|S1|R46504763/1	RL|S1|C9292#0
																H	18	150	98.4	+	0	0	26D124M168I	RL|S1|R11726997/1	RL|S1|C9292#0
																H	18	150	98.6	+	0	0	9D141M151I	RL|S1|R736273/1	RL|S1|C9292#0
																H	18	150	98.6	-	0	0	9D141M151I	RL|S1|R39133982/1	RL|S1|C9292#0
																H	18	150	98.7	+	0	0	16I150M126I	RL|S1|R16493387/2	RL|S1|C9292#0
																H	18	150	98.7	+	0	0	215I77M73D	RL|S1|R25661368/2	RL|S1|C9292#0
																H	18	150	98.7	+	0	0	3I150M139I	RL|S1|R14925390/1	RL|S1|C9292#0
																H	18	150	98.7	+	0	0	6I150M136I	RL|S1|R496875/2	RL|S1|C9292#0
																H	18	150	98.7	+	0	0	71D79M213I	RL|S1|R10697937/1	RL|S1|C9292#0
																H	18	150	98.7	+	0	0	86I150M56I	RL|S1|R24728353/1	RL|S1|C9292#0
																H	18	150	98.7	+	0	0	89I150M53I	RL|S1|R18316961/2	RL|S1|C9292#0
																H	18	150	98.7	-	0	0	214I78M72D	RL|S1|R23673566/1	RL|S1|C9292#0
																H	18	150	98.7	-	0	0	216I76M74D	RL|S1|R11686804/2	RL|S1|C9292#0
																H	18	150	98.7	-	0	0	36I150M106I	RL|S1|R1051246/1	RL|S1|C9292#0
																H	18	150	98.7	-	0	0	71I150M71I	RL|S1|R29540431/1	RL|S1|C9292#0
																H	18	150	98.8	+	0	0	212I80M70D	RL|S1|R9369353/1	RL|S1|C9292#0
																H	18	150	98.8	-	0	0	210I82M68D	RL|S1|R22421507/1	RL|S1|C9292#0
																H	18	150	98.9	+	0	0	203I89M61D	RL|S1|R19594452/1	RL|S1|C9292#0
																H	18	150	98.9	-	0	0	197I95M55D	RL|S1|R16493387/1	RL|S1|C9292#0
																H	18	150	98.9	-	0	0	56D94M198I	RL|S1|R26767783/2	RL|S1|C9292#0
																H	18	150	98.9	-	0	0	58D92M200I	RL|S1|R4545730/1	RL|S1|C9292#0
																H	18	150	99	+	0	0	52D98M194I	RL|S1|R7597373/1	RL|S1|C9292#0
																H	18	150	99.1	-	0	0	38D112M180I	RL|S1|R44615351/1	RL|S1|C9292#0
																H	18	150	99.1	-	0	0	43D107M185I	RL|S1|R44738058/1	RL|S1|C9292#0
																H	18	150	99.2	+	0	0	174I118M32D	RL|S1|R6046616/2	RL|S1|C9292#0
																H	18	150	99.3	+	0	0	156I136M14D	RL|S1|R32059652/2	RL|S1|C9292#0
																H	18	150	99.3	+	0	0	72I150M70I	RL|S1|R17671556/1	RL|S1|C9292#0
																H	18	150	99.3	-	0	0	119I150M23I	RL|S1|R27286614/1	RL|S1|C9292#0
																H	18	150	99.3	-	0	0	86I150M56I	RL|S1|R39012828/2	RL|S1|C9292#0
																H	18	150	99.3	-	0	0	94I150M48I	RL|S1|R7597373/2	RL|S1|C9292#0
																H	18	150	99.3	-	0	0	I150M141I	RL|S1|R23687621/1	RL|S1|C9292#0
																H	19	150	100	+	0	0	154I138M12D	RL|S1|R25839721/1	RL|S1|C9368#0
																H	19	150	100	+	0	0	177I115M35D	RL|S1|R25709583/1	RL|S1|C9368#0
																H	19	150	97.3	-	0	0	131I150M11I	RL|S1|R2680393/1	RL|S1|C9368#0
																H	19	150	98	+	0	0	122I150M20I	RL|S1|R4397422/1	RL|S1|C9368#0
																H	19	150	98.3	+	0	0	175I117M33D	RL|S1|R21544339/2	RL|S1|C9368#0
																H	19	150	98.4	-	0	0	163I129M21D	RL|S1|R6314380/2	RL|S1|C9368#0
																H	19	150	98.7	-	0	0	45I150M97I	RL|S1|R48853281/2	RL|S1|C9368#0
																H	19	150	99.3	+	0	0	110I150M32I	RL|S1|R42282268/1	RL|S1|C9368#0
																H	19	150	99.3	+	0	0	49I150M93I	RL|S1|R44957471/1	RL|S1|C9368#0
																H	19	150	99.3	-	0	0	133I150M9I	RL|S1|R7982713/1	RL|S1|C9368#0
																H	2	150	97.3	+	0	0	182I110M40D	RL|S1|R39889782/2	RL|S1|C610#0
																H	2	150	97.3	+	0	0	D149M143I	RL|S1|R49710402/1	RL|S1|C610#0
																H	2	150	97.5	-	0	0	28D122M170I	RL|S1|R48539580/2	RL|S1|C610#0
																H	2	150	97.6	-	0	0	207I85M65D	RL|S1|R12598418/1	RL|S1|C610#0
																H	2	150	98.7	-	0	0	128I150M14I	RL|S1|R35007581/1	RL|S1|C610#0
																H	2	150	99.3	-	0	0	11D139M153I	RL|S1|R6678438/1	RL|S1|C610#0
																H	20	150	100	+	0	0	105I150M37I	RL|S1|R11046682/1	RL|S1|C9525#0
																H	20	150	100	+	0	0	110I150M32I	RL|S1|R25452135/1	RL|S1|C9525#0
																H	20	150	100	+	0	0	127I150M15I	RL|S1|R13728410/1	RL|S1|C9525#0
																H	20	150	100	+	0	0	135I150M7I	RL|S1|R10686957/1	RL|S1|C9525#0
																H	20	150	100	+	0	0	156I136M14D	RL|S1|R31460427/1	RL|S1|C9525#0
																H	20	150	100	+	0	0	174I118M32D	RL|S1|R14378756/1	RL|S1|C9525#0
																H	20	150	100	+	0	0	184I108M42D	RL|S1|R37116800/2	RL|S1|C9525#0
																H	20	150	100	+	0	0	190I102M48D	RL|S1|R12232500/1	RL|S1|C9525#0
																H	20	150	100	+	0	0	84I150M58I	RL|S1|R25052316/1	RL|S1|C9525#0
																H	20	150	100	+	0	0	99I150M43I	RL|S1|R37452105/1	RL|S1|C9525#0
																H	20	150	100	-	0	0	120I150M22I	RL|S1|R16152040/1	RL|S1|C9525#0
																H	20	150	100	-	0	0	123I150M19I	RL|S1|R34582348/1	RL|S1|C9525#0
																H	20	150	100	-	0	0	168I124M26D	RL|S1|R28686154/1	RL|S1|C9525#0
																H	20	150	100	-	0	0	177I115M35D	RL|S1|R7863992/1	RL|S1|C9525#0
																H	20	150	97	+	0	0	158I134M16D	RL|S1|R35018003/2	RL|S1|C9525#0
																H	20	150	97.1	+	0	0	187I105M45D	RL|S1|R7926628/1	RL|S1|C9525#0
																H	20	150	97.1	+	0	0	190I102M48D	RL|S1|R22978286/2	RL|S1|C9525#0
																H	20	150	97.2	+	0	0	151I141M9D	RL|S1|R48286013/2	RL|S1|C9525#0
																H	20	150	97.2	+	0	0	185I107M43D	RL|S1|R33989502/1	RL|S1|C9525#0
																H	20	150	97.2	-	0	0	149I143M7D	RL|S1|R2894153/2	RL|S1|C9525#0
																H	20	150	97.2	-	0	0	185I107M43D	RL|S1|R37338475/2	RL|S1|C9525#0
																H	20	150	97.2	-	0	0	186I106M44D	RL|S1|R30809304/1	RL|S1|C9525#0
																H	20	150	97.3	+	0	0	105I150M37I	RL|S1|R27234727/2	RL|S1|C9525#0
																H	20	150	97.3	+	0	0	108I150M34I	RL|S1|R33509136/1	RL|S1|C9525#0
																H	20	150	97.3	+	0	0	116I150M26I	RL|S1|R11327973/1	RL|S1|C9525#0
																H	20	150	97.3	+	0	0	119I150M23I	RL|S1|R10613013/1	RL|S1|C9525#0
																H	20	150	97.3	+	0	0	134I150M8I	RL|S1|R45348031/2	RL|S1|C9525#0
																H	20	150	97.3	+	0	0	84I150M58I	RL|S1|R39537942/1	RL|S1|C9525#0
																H	20	150	97.3	-	0	0	104I150M38I	RL|S1|R37083158/2	RL|S1|C9525#0
																H	20	150	97.3	-	0	0	105I150M37I	RL|S1|R19724310/1	RL|S1|C9525#0
																H	20	150	97.3	-	0	0	113I150M29I	RL|S1|R37356198/1	RL|S1|C9525#0
																H	20	150	97.3	-	0	0	118I150M24I	RL|S1|R9397714/2	RL|S1|C9525#0
																H	20	150	97.3	-	0	0	121I150M21I	RL|S1|R24663181/1	RL|S1|C9525#0
																H	20	150	97.3	-	0	0	126I150M16I	RL|S1|R13853870/2	RL|S1|C9525#0
																H	20	150	97.3	-	0	0	135I150M7I	RL|S1|R1379740/2	RL|S1|C9525#0
																H	20	150	97.3	-	0	0	142I150M	RL|S1|R23697941/1	RL|S1|C9525#0
																H	20	150	97.3	-	0	0	181I111M39D	RL|S1|R6564034/2	RL|S1|C9525#0
																H	20	150	97.3	-	0	0	81I150M61I	RL|S1|R11150563/2	RL|S1|C9525#0
																H	20	150	97.3	-	0	0	82I150M60I	RL|S1|R47259959/2	RL|S1|C9525#0
																H	20	150	97.3	-	0	0	86I150M56I	RL|S1|R19404923/2	RL|S1|C9525#0
																H	20	150	97.3	-	0	0	96I150M46I	RL|S1|R38954972/1	RL|S1|C9525#0
																H	20	150	97.4	-	0	0	176I116M34D	RL|S1|R24492526/1	RL|S1|C9525#0
																H	20	150	97.5	-	0	0	171I121M29D	RL|S1|R6167909/2	RL|S1|C9525#0
																H	20	150	97.5	-	0	0	173I119M31D	RL|S1|R17231457/1	RL|S1|C9525#0
																H	20	150	97.7	+	0	0	164I128M22D	RL|S1|R49227918/2	RL|S1|C9525#0
																H	20	150	97.7	-	0	0	159I133M17D	RL|S1|R23805491/1	RL|S1|C9525#0
																H	20	150	97.8	+	0	0	155I137M13D	RL|S1|R2670616/2	RL|S1|C9525#0
																H	20	150	97.8	-	0	0	158I134M16D	RL|S1|R14229085/1	RL|S1|C9525#0
																H	20	150	97.9	+	0	0	151I141M9D	RL|S1|R12755758/1	RL|S1|C9525#0
																H	20	150	97.9	-	0	0	147I145M5D	RL|S1|R47342766/1	RL|S1|C9525#0
																H	20	150	97.9	-	0	0	148I144M6D	RL|S1|R43584037/2	RL|S1|C9525#0
																H	20	150	98	+	0	0	104I150M38I	RL|S1|R32608943/2	RL|S1|C9525#0
																H	20	150	98	+	0	0	106I150M36I	RL|S1|R49034566/1	RL|S1|C9525#0
																H	20	150	98	+	0	0	108I150M34I	RL|S1|R2800360/2	RL|S1|C9525#0
																H	20	150	98	+	0	0	109I150M33I	RL|S1|R37338475/1	RL|S1|C9525#0
																H	20	150	98	+	0	0	114I150M28I	RL|S1|R27840581/1	RL|S1|C9525#0
																H	20	150	98	+	0	0	114I150M28I	RL|S1|R6815780/2	RL|S1|C9525#0
																H	20	150	98	+	0	0	118I150M24I	RL|S1|R49656449/1	RL|S1|C9525#0
																H	20	150	98	+	0	0	122I150M20I	RL|S1|R19336559/1	RL|S1|C9525#0
																H	20	150	98	+	0	0	124I150M18I	RL|S1|R23249054/1	RL|S1|C9525#0
																H	20	150	98	+	0	0	128I150M14I	RL|S1|R21618375/2	RL|S1|C9525#0
																H	20	150	98	+	0	0	144I148M2D	RL|S1|R24787455/1	RL|S1|C9525#0
																H	20	150	98	+	0	0	191I101M49D	RL|S1|R6773848/2	RL|S1|C9525#0
																H	20	150	98	+	0	0	90I150M52I	RL|S1|R9586196/2	RL|S1|C9525#0
																H	20	150	98	+	0	0	92I150M50I	RL|S1|R2437831/2	RL|S1|C9525#0
																H	20	150	98	+	0	0	96I150M46I	RL|S1|R19569773/2	RL|S1|C9525#0
																H	20	150	98	+	0	0	97I150M45I	RL|S1|R3413648/1	RL|S1|C9525#0
																H	20	150	98	+	0	0	97I150M45I	RL|S1|R37180186/2	RL|S1|C9525#0
																H	20	150	98	-	0	0	103I150M39I	RL|S1|R1651726/2	RL|S1|C9525#0
																H	20	150	98	-	0	0	103I150M39I	RL|S1|R2981107/1	RL|S1|C9525#0
																H	20	150	98	-	0	0	105I150M37I	RL|S1|R49542271/2	RL|S1|C9525#0
																H	20	150	98	-	0	0	112I150M30I	RL|S1|R40717841/1	RL|S1|C9525#0
																H	20	150	98	-	0	0	115I150M27I	RL|S1|R15163938/2	RL|S1|C9525#0
																H	20	150	98	-	0	0	120I150M22I	RL|S1|R31716398/1	RL|S1|C9525#0
																H	20	150	98	-	0	0	122I150M20I	RL|S1|R10025815/2	RL|S1|C9525#0
																H	20	150	98	-	0	0	138I150M4I	RL|S1|R23157185/1	RL|S1|C9525#0
																H	20	150	98	-	0	0	143I149MD	RL|S1|R40093316/2	RL|S1|C9525#0
																H	20	150	98	-	0	0	144I148M2D	RL|S1|R38901651/2	RL|S1|C9525#0
																H	20	150	98	-	0	0	192I100M50D	RL|S1|R2437831/1	RL|S1|C9525#0
																H	20	150	98	-	0	0	89I150M53I	RL|S1|R33727858/1	RL|S1|C9525#0
																H	20	150	98	-	0	0	89I150M53I	RL|S1|R38988821/1	RL|S1|C9525#0
																H	20	150	98	-	0	0	95I150M47I	RL|S1|R33471010/2	RL|S1|C9525#0
																H	20	150	98.2	+	0	0	178I114M36D	RL|S1|R8111769/1	RL|S1|C9525#0
																H	20	150	98.2	+	0	0	180I112M38D	RL|S1|R42270113/2	RL|S1|C9525#0
																H	20	150	98.2	-	0	0	180I112M38D	RL|S1|R28790678/2	RL|S1|C9525#0
																H	20	150	98.2	-	0	0	181I111M39D	RL|S1|R21011860/1	RL|S1|C9525#0
																H	20	150	98.2	-	0	0	182I110M40D	RL|S1|R5999682/1	RL|S1|C9525#0
																H	20	150	98.3	-	0	0	172I120M30D	RL|S1|R1635220/1	RL|S1|C9525#0
																H	20	150	98.3	-	0	0	172I120M30D	RL|S1|R28901989/2	RL|S1|C9525#0
																H	20	150	98.3	-	0	0	175I117M33D	RL|S1|R2767470/2	RL|S1|C9525#0
																H	20	150	98.4	+	0	0	167I125M25D	RL|S1|R39270678/1	RL|S1|C9525#0
																H	20	150	98.4	-	0	0	163I129M21D	RL|S1|R6842767/1	RL|S1|C9525#0
																H	20	150	98.5	+	0	0	155I137M13D	RL|S1|R47675045/2	RL|S1|C9525#0
																H	20	150	98.5	+	0	0	157I135M15D	RL|S1|R17204332/1	RL|S1|C9525#0
																H	20	150	98.5	+	0	0	157I135M15D	RL|S1|R25986674/1	RL|S1|C9525#0
																H	20	150	98.5	+	0	0	158I134M16D	RL|S1|R29322716/2	RL|S1|C9525#0
																H	20	150	98.5	+	0	0	161I131M19D	RL|S1|R41142639/1	RL|S1|C9525#0
																H	20	150	98.5	+	0	0	162I130M20D	RL|S1|R40773367/2	RL|S1|C9525#0
																H	20	150	98.5	-	0	0	156I136M14D	RL|S1|R17240073/1	RL|S1|C9525#0
																H	20	150	98.5	-	0	0	156I136M14D	RL|S1|R6197550/2	RL|S1|C9525#0
																H	20	150	98.5	-	0	0	161I131M19D	RL|S1|R9586196/1	RL|S1|C9525#0
																H	20	150	98.6	+	0	0	144I148M2D	RL|S1|R49441509/1	RL|S1|C9525#0
																H	20	150	98.6	+	0	0	147I145M5D	RL|S1|R13133487/2	RL|S1|C9525#0
																H	20	150	98.6	+	0	0	149I143M7D	RL|S1|R1923694/1	RL|S1|C9525#0
																H	20	150	98.6	-	0	0	144I148M2D	RL|S1|R22490749/1	RL|S1|C9525#0
																H	20	150	98.7	+	0	0	110I150M32I	RL|S1|R28660291/2	RL|S1|C9525#0
																H	20	150	98.7	+	0	0	117I150M25I	RL|S1|R34108395/1	RL|S1|C9525#0
																H	20	150	98.7	+	0	0	118I150M24I	RL|S1|R41792259/2	RL|S1|C9525#0
																H	20	150	98.7	+	0	0	119I150M23I	RL|S1|R45374485/1	RL|S1|C9525#0
																H	20	150	98.7	+	0	0	122I150M20I	RL|S1|R5286150/1	RL|S1|C9525#0
																H	20	150	98.7	+	0	0	132I150M10I	RL|S1|R5926633/1	RL|S1|C9525#0
																H	20	150	98.7	+	0	0	134I150M8I	RL|S1|R18906033/1	RL|S1|C9525#0
																H	20	150	98.7	+	0	0	143I149MD	RL|S1|R38967456/1	RL|S1|C9525#0
																H	20	150	98.7	+	0	0	84I150M58I	RL|S1|R13117706/1	RL|S1|C9525#0
																H	20	150	98.7	+	0	0	87I150M55I	RL|S1|R10001406/1	RL|S1|C9525#0
																H	20	150	98.7	-	0	0	100I150M42I	RL|S1|R32737616/1	RL|S1|C9525#0
																H	20	150	98.7	-	0	0	102I150M40I	RL|S1|R40009627/1	RL|S1|C9525#0
																H	20	150	98.7	-	0	0	109I150M33I	RL|S1|R29978805/1	RL|S1|C9525#0
[truncated: 4,018 more rows]

## Sheet: CAMI genomes v4 coverage
CAMI genomes v4 region kMer coverage			Avg	Min
OTU		Coverage	Depth	Depth		Depths for each 50-mer
RL|S1|C274#0	Hydrotalea_sandarakina_strain_AF-51_(NR_109380.1)	100	156.963	51		215	214	215	215	211	209	210	207	203	203	202	197	202	200	198	202	200	196	193	199	199	204	199	196	189	190	190	193	194	200	197	193	194	196	195	191	187	189	185	186	191	192	193	194
RL|S1|C328#0	Defluviimonas_denitrificans_strain_D9-3_(NR_115019.1)	100	33.843	15		57	55	56	58	59	60	59	61	62	62	63	62	61	59	62	59	59	56	54	55	56	54	53	54	54	53	56	21	23	23	25	24	26	25	25	26	25	25	25	25	25	25	25	24
RL|S1|C610#0	Nonlabens_dokdonensis_(NR_102491.1)	50	0.619835	0		3	2	2	2	2	1	1	1	1	1	1	1	1	1	1	1	1	1	1	1	1	1	1	1	1	1	1	1	1	1	1	1	1	1	1	1	1	0	0	0	0	0	0	0
RL|S1|C899#0	Hydrotalea_sandarakina_strain_AF-51_(NR_109380.1)	100	149.678	105		114	110	112	115	114	110	114	116	118	112	111	113	115	112	115	116	119	121	117	117	117	117	116	120	122	123	123	121	122	124	122	120	124	123	124	121	122	123	122	125	122	120	118	114
RL|S1|C983#0	Hydrotalea_sandarakina_strain_AF-51_(NR_109380.1)	100	132.789	1		215	214	215	215	211	209	210	207	203	203	202	197	202	200	198	202	200	196	193	199	199	204	199	196	189	190	190	193	194	200	197	193	194	196	195	191	187	189	185	186	191	192	193	194
RL|S1|C1061#0	Flavisolibacter_ginsengisoli_strain_Gsoil_643_(NR_041500.1)	100	33.0992	21		35	36	37	36	38	39	41	44	44	45	45	43	42	44	43	41	42	39	38	38	38	37	37	37	37	38	37	37	36	36	34	35	33	33	32	33	33	35	35	34	32	29	29	30
RL|S1|C1410#0	Xylella_fastidiosa_strain_PCE-FF_(NR_041779.1)	100	8.67769	3		20	20	19	18	18	19	19	18	17	18	20	18	7	7	7	6	7	6	6	6	6	6	7	8	8	8	8	8	8	6	6	6	6	5	5	5	5	6	6	6	6	6	6	5
RL|S1|C2427#0	Flavisolibacter_ginsengisoli_strain_Gsoil_643_(NR_041500.1)	100	33.0992	21		35	36	37	36	38	39	41	44	44	45	45	43	42	44	43	41	42	39	38	38	38	37	37	37	37	38	37	37	36	36	34	35	33	33	32	33	33	35	35	34	32	29	29	30
RL|S1|C3649#0	Tetrasphaera_duodecadis_strain_IAM_14868_(NR_040880.1)	100	104.421	90		116	115	115	116	116	116	114	115	112	112	105	105	103	106	109	108	111	112	111	107	106	105	110	109	107	107	105	106	106	106	106	107	107	105	102	99	100	98	100	102	105	101	97	99
RL|S1|C4033#0	Lysobacter_oryzae_strain_YC6269_(NR_044484.1)	100	11.4669	4		20	20	19	18	18	19	19	18	17	18	20	18	11	11	10	10	10	9	9	9	9	9	6	6	6	6	7	8	8	9	9	9	9	9	9	9	9	9	9	9	10	10	9	9
RL|S1|C4285#0	Desulfatibacillum_alkenivorans_strain_PF2803_(NR_025795.1)	100	15.8554	9		14	13	13	13	14	17	17	17	17	16	16	16	16	16	16	15	15	15	13	13	15	15	15	14	15	13	12	11	10	10	9	9	9	10	10	10	11	11	11	13	13	13	13	15
RL|S1|C4952#0	Massilia_namucuonensis_strain_333-1-0411_(NR_118215.1)	100	58.5455	40		67	67	66	67	64	67	69	67	64	66	66	65	64	65	66	66	68	65	63	64	63	63	66	66	66	57	57	55	53	55	53	52	51	51	54	53	51	52	53	52	53	54	52	52
RL|S1|C6421#0	Albidovulum_xiamenense_strain_YBY-7_(NR_118031.1)	100	13.5083	2		57	55	56	58	59	60	59	61	62	62	63	62	61	59	62	3	3	3	2	2	2	2	2	2	2	2	2	2	2	2	2	2	2	2	2	2	2	2	2	2	2	2	3	3
RL|S1|C7679#0	Paracoccus_denitrificans_strain_381_(NR_026456.1)	100	41.4421	27		57	55	56	58	59	60	59	61	62	62	63	62	61	59	62	59	59	56	54	55	56	54	53	54	54	53	56	34	36	35	35	34	36	36	37	38	40	38	39	39	40	42	41	39
RL|S1|C8086#0	Hydrotalea_sandarakina_strain_AF-51_(NR_109380.1)	100	149.678	105		114	110	112	115	114	110	114	116	118	112	111	113	115	112	115	116	119	121	117	117	117	117	116	120	122	123	123	121	122	124	122	120	124	123	124	121	122	123	122	125	122	120	118	114
RL|S1|C8248#0	Pseudomonas_aeruginosa_strain_DSM_50071_(NR_117678.1)	100	66.9215	53		60	58	61	61	62	59	59	59	58	56	56	54	53	56	55	54	54	55	55	57	58	56	54	54	56	58	59	61	62	62	65	68	66	69	66	67	67	64	65	63	64	64	62	56
RL|S1|C8876#0	Flavisolibacter_ginsengisoli_strain_Gsoil_643_(NR_041500.1)	100	33.0992	21		35	36	37	36	38	39	41	44	44	45	45	43	42	44	43	41	42	39	38	38	38	37	37	37	37	38	37	37	36	36	34	35	33	33	32	33	33	35	35	34	32	29	29	30
RL|S1|C8891#0	Paracoccus_denitrificans_strain_381_(NR_026456.1)	100	41.4421	27		57	55	56	58	59	60	59	61	62	62	63	62	61	59	62	59	59	56	54	55	56	54	53	54	54	53	56	34	36	35	35	34	36	36	37	38	40	38	39	39	40	42	41	39
RL|S1|C9292#0	Exiguobacterium_acetylicum_strain_DSM_20416_(NR_043479.1)	100	18.5372	2		10	11	12	13	13	13	12	11	12	12	11	11	11	10	10	11	11	11	10	10	10	10	9	9	9	10	10	9	9	10	10	9	10	10	9	8	9	9	9	9	9	9	9	9
RL|S1|C9368#0	Hydrotalea_sandarakina_strain_AF-51_(NR_109380.1)	100	145.504	1		215	214	215	215	211	209	210	207	203	203	202	197	202	200	198	202	200	196	193	199	199	204	199	196	189	190	190	193	194	200	197	193	194	196	195	191	187	189	185	186	191	192	193	194
RL|S1|C9525#0	Hydrotalea_sandarakina_strain_AF-51_(NR_109380.1)	100	159.992	60		215	214	215	215	211	209	210	207	203	203	202	197	202	200	198	202	200	196	193	199	199	204	199	196	189	190	190	193	194	200	197	193	194	196	195	191	187	189	185	186	191	192	193	194
RL|S1|C10560#0	Exiguobacterium_acetylicum_strain_DSM_20416_(NR_043479.1)	100	30.3843	6		61	66	66	66	66	68	64	63	60	57	55	54	54	55	18	18	18	19	19	20	21	21	20	19	20	21	21	20	20	21	21	21	21	21	20	20	18	18	19	18	17	19	17	18
RL|S1|C11048#0	Lysobacter_oryzae_strain_YC6269_(NR_044484.1)	100	11.4669	4		20	20	19	18	18	19	19	18	17	18	20	18	11	11	10	10	10	9	9	9	9	9	6	6	6	6	7	8	8	9	9	9	9	9	9	9	9	9	9	9	10	10	9	9
RL|S1|C11515#0	Schwartzia_succinivorans_strain_S1-1_(NR_029325.1)	100	258.544	241		262	260	263	266	268	270	267	270	271	271	275	267	265	265	264	264	267	265	258	261	258	257	254	257	263	262	253	251	250	253	256	253	261	258	258	254	250	252	248	245	253	255	252	256
RL|S1|C11517#0	Lampropedia_hyalina_strain_IAM_14890_(NR_040942.1)	97	11.0165	0		67	67	66	67	64	67	69	67	64	66	66	65	64	65	66	66	68	65	63	64	63	63	66	66	66	5	5	5	5	5	5	5	5	5	5	5	5	5	5	5	5	5	5	5
RL|S1|C11782#0	Hydrotalea_sandarakina_strain_AF-51_(NR_109380.1)	100	103.083	1		215	214	6	6	5	5	6	6	6	7	6	7	7	7	7	6	6	6	5	4	4	4	116	120	122	123	123	121	122	124	122	120	124	123	124	121	122	123	122	125	122	120	118	114
RL|S1|C12411#0	Exiguobacterium_acetylicum_strain_DSM_20416_(NR_043479.1)	100	33.0289	5		12	12	12	12	12	11	11	9	9	9	7	6	7	7	7	6	6	6	5	5	6	5	6	5	5	6	8	8	8	9	9	8	10	11	11	11	12	10	9	9	8	8	8	8
RL|S1|C12495#0	Tepidibacter_formicigenes_strain_DV1184_(NR_029081.1)	100	6.84647	4		9	9	9	9	9	9	9	9	9	9	9	10	8	8	7	6	6	6	6	6	5	5	5	5	5	4	5	5	5	5	5	5	5	5	5	6	6	6	7	7	7	8	8	8
RL|S1|C14115#0	Exiguobacterium_acetylicum_strain_DSM_20416_(NR_043479.1)	100	44.0248	23		61	66	66	66	66	68	64	63	60	57	55	54	54	55	37	36	37	38	40	41	40	39	39	39	38	39	41	39	39	40	41	35	38	39	38	37	37	36	35	35	33	32	34	36
RL|S1|C15246#0	Paracoccus_denitrificans_strain_381_(NR_026456.1)	100	41.4421	27		57	55	56	58	59	60	59	61	62	62	63	62	61	59	62	59	59	56	54	55	56	54	53	54	54	53	56	34	36	35	35	34	36	36	37	38	40	38	39	39	40	42	41	39
RL|S1|C15554#0	Williamsia_phyllosphaerae_strain_C7_(NR_108495.1)	100	11.5372	2		7	7	7	8	8	8	8	8	7	8	8	8	8	8	7	7	5	5	5	5	4	4	4	5	5	5	4	3	3	3	3	3	3	3	3	2	4	4	4	4	4	4	6	6
RL|S1|C15556#0	Flavisolibacter_ginsengisoli_strain_Gsoil_643_(NR_041500.1)	100	33.0992	21		35	36	37	36	38	39	41	44	44	45	45	43	42	44	43	41	42	39	38	38	38	37	37	37	37	38	37	37	36	36	34	35	33	33	32	33	33	35	35	34	32	29	29	30
RL|S1|C15855#0	Hydrotalea_sandarakina_strain_AF-51_(NR_109380.1)	100	159.992	60		215	214	215	215	211	209	210	207	203	203	202	197	202	200	198	202	200	196	193	199	199	204	199	196	189	190	190	193	194	200	197	193	194	196	195	191	187	189	185	186	191	192	193	194
RL|S1|C16295#0	Hydrotalea_sandarakina_strain_AF-51_(NR_109380.1)	100	158.083	58		215	214	215	215	211	209	210	207	203	203	202	197	202	200	198	202	200	196	193	199	199	204	199	196	189	190	190	193	194	200	197	193	194	196	195	191	187	189	185	186	191	192	193	194
RL|S1|C16306#0	Flavisolibacter_ginsengisoli_strain_Gsoil_643_(NR_041500.1)	100	33.0992	21		35	36	37	36	38	39	41	44	44	45	45	43	42	44	43	41	42	39	38	38	38	37	37	37	37	38	37	37	36	36	34	35	33	33	32	33	33	35	35	34	32	29	29	30
RL|S1|C16600#0	Exiguobacterium_acetylicum_strain_DSM_20416_(NR_043479.1)	100	37.5041	17		61	66	66	66	66	68	64	63	60	57	55	54	54	55	18	18	18	19	19	20	21	21	20	19	20	21	21	20	20	21	21	21	21	21	20	20	18	18	19	18	17	19	17	18
RL|S1|C17184#0	Anaerobranca_zavarzinii_strain_JW/VK-KS5Y_(NR_044155.1)	96	2.63071	0		1	1	1	1	1	1	2	3	3	3	3	3	3	2	1	1	1	1	1	1	1	1	1	1	1	1	1	1	1	1	1	0	0	0	0	0	0	0	0	1	1	1	1	1
RL|S1|C17251#0	Lysobacter_oryzae_strain_YC6269_(NR_044484.1)	100	11.4669	4		20	20	19	18	18	19	19	18	17	18	20	18	11	11	10	10	10	9	9	9	9	9	6	6	6	6	7	8	8	9	9	9	9	9	9	9	9	9	9	9	10	10	9	9
RL|S1|C17681#0	Xylella_fastidiosa_strain_PCE-FF_(NR_041779.1)	100	8.67769	3		20	20	19	18	18	19	19	18	17	18	20	18	7	7	7	6	7	6	6	6	6	6	7	8	8	8	8	8	8	6	6	6	6	5	5	5	5	6	6	6	6	6	6	5
RL|S1|C17806#0	Hydrotalea_sandarakina_strain_AF-51_(NR_109380.1)	100	156.963	51		215	214	215	215	211	209	210	207	203	203	202	197	202	200	198	202	200	196	193	199	199	204	199	196	189	190	190	193	194	200	197	193	194	196	195	191	187	189	185	186	191	192	193	194
RL|S1|C18841#0	Lysobacter_oryzae_strain_YC6269_(NR_044484.1)	100	11.4669	4		20	20	19	18	18	19	19	18	17	18	20	18	11	11	10	10	10	9	9	9	9	9	6	6	6	6	7	8	8	9	9	9	9	9	9	9	9	9	9	9	10	10	9	9
RL|S1|C18954#0	Hydrotalea_sandarakina_strain_AF-51_(NR_109380.1)	100	159.992	60		215	214	215	215	211	209	210	207	203	203	202	197	202	200	198	202	200	196	193	199	199	204	199	196	189	190	190	193	194	200	197	193	194	196	195	191	187	189	185	186	191	192	193	194
RL|S1|C19147#0	Hydrotalea_sandarakina_strain_AF-51_(NR_109380.1)	100	149.678	105		114	110	112	115	114	110	114	116	118	112	111	113	115	112	115	116	119	121	117	117	117	117	116	120	122	123	123	121	122	124	122	120	124	123	124	121	122	123	122	125	122	120	118	114
[truncated: 198 more columns]

## Sheet: Kelpie uc
									USG closest species		USG closest species	Count			Paste new .uc file here									USG closest species		Distinct USG closest species
H	8319	252	99.6	+	0	0	519I252M718I	R2	Schwartzia_succinivorans_strain_S1-1_(NR_029325.1)		Albidovulum_xiamenense_strain_YBY-7_(NR_118031.1)	1	1		H	8319	252	98.8	+	0	0	519I252M718I	R2	Schwartzia_succinivorans_strain_S1-1_(NR_029325.1)		Schwartzia_succinivorans_strain_S1-1_(NR_029325.1)	597	615
H	8319	252	99.6	+	0	0	519I252M718I	R3	Schwartzia_succinivorans_strain_S1-1_(NR_029325.1)		Defluviimonas_denitrificans_strain_D9-3_(NR_115019.1)	48	52		H	8319	252	98.8	+	0	0	519I252M718I	R1	Schwartzia_succinivorans_strain_S1-1_(NR_029325.1)		Hydrotalea_sandarakina_strain_AF-51_(NR_109380.1)	749	759
H	8319	252	99.6	+	0	0	519I252M718I	R1	Schwartzia_succinivorans_strain_S1-1_(NR_029325.1)		Desulfatibacillum_alkenivorans_strain_PF2803_(NR_025795.1)	42	56		H	8319	252	98.8	+	0	0	519I252M718I	R3	Schwartzia_succinivorans_strain_S1-1_(NR_029325.1)		Exiguobacterium_acetylicum_strain_DSM_20416_(NR_043479.1)	157	152
H	8319	252	99.6	+	0	0	519I252M718I	R4	Schwartzia_succinivorans_strain_S1-1_(NR_029325.1)		Exiguobacterium_acetylicum_strain_DSM_20416_(NR_043479.1)	152	157		H	8319	252	98.8	+	0	0	519I252M718I	R4	Schwartzia_succinivorans_strain_S1-1_(NR_029325.1)		Lysobacter_oryzae_strain_YC6269_(NR_044484.1)	21	16
H	8319	252	99.6	+	0	0	519I252M718I	R5	Schwartzia_succinivorans_strain_S1-1_(NR_029325.1)		Exiguobacterium_sibiricum_strain_255-15_(NR_075006.1)	17	17		H	8319	252	98.8	+	0	0	519I252M718I	R5	Schwartzia_succinivorans_strain_S1-1_(NR_029325.1)		Pseudomonas_aeruginosa_strain_DSM_50071_(NR_117678.1)	95	100
H	8319	252	100	+	0	0	519I252M718I	R6	Schwartzia_succinivorans_strain_S1-1_(NR_029325.1)		Flavisolibacter_ginsengisoli_strain_Gsoil_643_(NR_041500.1)	83	83		H	8319	252	100	+	0	0	519I252M718I	R6	Schwartzia_succinivorans_strain_S1-1_(NR_029325.1)		Paracoccus_denitrificans_strain_381_(NR_026456.1)	73	74
H	8319	252	100	+	0	0	519I252M718I	R7	Schwartzia_succinivorans_strain_S1-1_(NR_029325.1)		Hydrotalea_sandarakina_strain_AF-51_(NR_109380.1)	759	749		H	8319	252	100	+	0	0	519I252M718I	R7	Schwartzia_succinivorans_strain_S1-1_(NR_029325.1)		Massilia_namucuonensis_strain_333-1-0411_(NR_118215.1)	130	132
H	8319	252	100	+	0	0	519I252M718I	R8	Schwartzia_succinivorans_strain_S1-1_(NR_029325.1)		Lysobacter_oryzae_strain_YC6269_(NR_044484.1)	16	21		H	8319	252	100	+	0	0	519I252M718I	R8	Schwartzia_succinivorans_strain_S1-1_(NR_029325.1)		Tetrasphaera_duodecadis_strain_IAM_14868_(NR_040880.1)	260	255
H	8319	252	100	+	0	0	519I252M718I	R9	Schwartzia_succinivorans_strain_S1-1_(NR_029325.1)		Massilia_namucuonensis_strain_333-1-0411_(NR_118215.1)	132	130		H	8319	252	100	+	0	0	519I252M718I	R9	Schwartzia_succinivorans_strain_S1-1_(NR_029325.1)		Flavisolibacter_ginsengisoli_strain_Gsoil_643_(NR_041500.1)	83	83
H	8319	252	100	+	0	0	519I252M718I	R10	Schwartzia_succinivorans_strain_S1-1_(NR_029325.1)		Paracoccus_denitrificans_strain_381_(NR_026456.1)	74	73		H	8319	252	100	+	0	0	519I252M718I	R10	Schwartzia_succinivorans_strain_S1-1_(NR_029325.1)		Defluviimonas_denitrificans_strain_D9-3_(NR_115019.1)	52	48
H	8319	252	100	+	0	0	519I252M718I	R11	Schwartzia_succinivorans_strain_S1-1_(NR_029325.1)		Pseudomonas_aeruginosa_strain_DSM_50071_(NR_117678.1)	100	95		H	8319	252	100	+	0	0	519I252M718I	R11	Schwartzia_succinivorans_strain_S1-1_(NR_029325.1)		Desulfatibacillum_alkenivorans_strain_PF2803_(NR_025795.1)	56	42
H	8319	252	100	+	0	0	519I252M718I	R12	Schwartzia_succinivorans_strain_S1-1_(NR_029325.1)		Pseudomonas_guangdongensis_strain_SgZ-6_(NR_118458.1)	3	10		H	8319	252	100	+	0	0	519I252M718I	R12	Schwartzia_succinivorans_strain_S1-1_(NR_029325.1)		Tepidibacter_formicigenes_strain_DV1184_(NR_029081.1)	11	11
H	8319	252	100	+	0	0	519I252M718I	R13	Schwartzia_succinivorans_strain_S1-1_(NR_029325.1)		Pseudomonas_indica_strain_IMT37_(NR_028801.1)	5	5		H	8319	252	100	+	0	0	519I252M718I	R13	Schwartzia_succinivorans_strain_S1-1_(NR_029325.1)		Exiguobacterium_sibiricum_strain_255-15_(NR_075006.1)	17	17
H	8319	252	100	+	0	0	519I252M718I	R14	Schwartzia_succinivorans_strain_S1-1_(NR_029325.1)		Schwartzia_succinivorans_strain_S1-1_(NR_029325.1)	615	597		H	8319	252	100	+	0	0	519I252M718I	R14	Schwartzia_succinivorans_strain_S1-1_(NR_029325.1)		Pseudomonas_guangdongensis_strain_SgZ-6_(NR_118458.1)	10	3
H	8319	252	100	+	0	0	519I252M718I	R15	Schwartzia_succinivorans_strain_S1-1_(NR_029325.1)		Tepidibacter_formicigenes_strain_DV1184_(NR_029081.1)	11	11		H	8319	252	100	+	0	0	519I252M718I	R15	Schwartzia_succinivorans_strain_S1-1_(NR_029325.1)		Xylella_fastidiosa_strain_PCE-FF_(NR_041779.1)	12	17
H	8319	252	100	+	0	0	519I252M718I	R16	Schwartzia_succinivorans_strain_S1-1_(NR_029325.1)		Tetrasphaera_duodecadis_strain_IAM_14868_(NR_040880.1)	255	260		H	8319	252	100	+	0	0	519I252M718I	R16	Schwartzia_succinivorans_strain_S1-1_(NR_029325.1)		Pseudomonas_indica_strain_IMT37_(NR_028801.1)	5	5
H	8319	252	100	+	0	0	519I252M718I	R17	Schwartzia_succinivorans_strain_S1-1_(NR_029325.1)		Williamsia_phyllosphaerae_strain_C7_(NR_108495.1)	8	8		H	8319	252	100	+	0	0	519I252M718I	R17	Schwartzia_succinivorans_strain_S1-1_(NR_029325.1)		Albidovulum_xiamenense_strain_YBY-7_(NR_118031.1)	1	1
H	8319	252	100	+	0	0	519I252M718I	R18	Schwartzia_succinivorans_strain_S1-1_(NR_029325.1)		Xylella_fastidiosa_strain_PCE-FF_(NR_041779.1)	17	12		H	8319	252	100	+	0	0	519I252M718I	R18	Schwartzia_succinivorans_strain_S1-1_(NR_029325.1)		Williamsia_phyllosphaerae_strain_C7_(NR_108495.1)	8	8
H	8319	252	100	+	0	0	519I252M718I	R19	Schwartzia_succinivorans_strain_S1-1_(NR_029325.1)						H	8319	252	100	+	0	0	519I252M718I	R19	Schwartzia_succinivorans_strain_S1-1_(NR_029325.1)
H	8319	252	100	+	0	0	519I252M718I	R20	Schwartzia_succinivorans_strain_S1-1_(NR_029325.1)			2338	2337		H	8319	252	100	+	0	0	519I252M718I	R20	Schwartzia_succinivorans_strain_S1-1_(NR_029325.1)			2337
H	8319	252	100	+	0	0	519I252M718I	R21	Schwartzia_succinivorans_strain_S1-1_(NR_029325.1)						H	8319	252	100	+	0	0	519I252M718I	R21	Schwartzia_succinivorans_strain_S1-1_(NR_029325.1)
H	8319	252	100	+	0	0	519I252M718I	R22	Schwartzia_succinivorans_strain_S1-1_(NR_029325.1)						H	8319	252	100	+	0	0	519I252M718I	R22	Schwartzia_succinivorans_strain_S1-1_(NR_029325.1)
H	8319	252	100	+	0	0	519I252M718I	R24	Schwartzia_succinivorans_strain_S1-1_(NR_029325.1)						H	8319	252	100	+	0	0	519I252M718I	R23	Schwartzia_succinivorans_strain_S1-1_(NR_029325.1)
H	8319	252	100	+	0	0	519I252M718I	R26	Schwartzia_succinivorans_strain_S1-1_(NR_029325.1)						H	8319	252	100	+	0	0	519I252M718I	R24	Schwartzia_succinivorans_strain_S1-1_(NR_029325.1)
H	8319	252	100	+	0	0	519I252M718I	R25	Schwartzia_succinivorans_strain_S1-1_(NR_029325.1)						H	8319	252	100	+	0	0	519I252M718I	R25	Schwartzia_succinivorans_strain_S1-1_(NR_029325.1)
H	8319	252	100	+	0	0	519I252M718I	R23	Schwartzia_succinivorans_strain_S1-1_(NR_029325.1)						H	8319	252	100	+	0	0	519I252M718I	R27	Schwartzia_succinivorans_strain_S1-1_(NR_029325.1)
H	8319	252	100	+	0	0	519I252M718I	R27	Schwartzia_succinivorans_strain_S1-1_(NR_029325.1)						H	8319	252	100	+	0	0	519I252M718I	R26	Schwartzia_succinivorans_strain_S1-1_(NR_029325.1)
H	8319	252	100	+	0	0	519I252M718I	R28	Schwartzia_succinivorans_strain_S1-1_(NR_029325.1)						H	8319	252	100	+	0	0	519I252M718I	R28	Schwartzia_succinivorans_strain_S1-1_(NR_029325.1)
H	8319	252	100	+	0	0	519I252M718I	R29	Schwartzia_succinivorans_strain_S1-1_(NR_029325.1)						H	8319	252	100	+	0	0	519I252M718I	R29	Schwartzia_succinivorans_strain_S1-1_(NR_029325.1)
H	8319	252	100	+	0	0	519I252M718I	R30	Schwartzia_succinivorans_strain_S1-1_(NR_029325.1)						H	8319	252	100	+	0	0	519I252M718I	R30	Schwartzia_succinivorans_strain_S1-1_(NR_029325.1)
H	8319	252	100	+	0	0	519I252M718I	R31	Schwartzia_succinivorans_strain_S1-1_(NR_029325.1)						H	8319	252	100	+	0	0	519I252M718I	R31	Schwartzia_succinivorans_strain_S1-1_(NR_029325.1)
H	8319	252	100	+	0	0	519I252M718I	R32	Schwartzia_succinivorans_strain_S1-1_(NR_029325.1)						H	8319	252	100	+	0	0	519I252M718I	R32	Schwartzia_succinivorans_strain_S1-1_(NR_029325.1)
H	8319	252	100	+	0	0	519I252M718I	R33	Schwartzia_succinivorans_strain_S1-1_(NR_029325.1)						H	8319	252	100	+	0	0	519I252M718I	R33	Schwartzia_succinivorans_strain_S1-1_(NR_029325.1)
H	8319	252	100	+	0	0	519I252M718I	R34	Schwartzia_succinivorans_strain_S1-1_(NR_029325.1)						H	8319	252	100	+	0	0	519I252M718I	R34	Schwartzia_succinivorans_strain_S1-1_(NR_029325.1)
H	8319	252	100	+	0	0	519I252M718I	R35	Schwartzia_succinivorans_strain_S1-1_(NR_029325.1)						H	8319	252	100	+	0	0	519I252M718I	R35	Schwartzia_succinivorans_strain_S1-1_(NR_029325.1)
H	8319	252	100	+	0	0	519I252M718I	R36	Schwartzia_succinivorans_strain_S1-1_(NR_029325.1)						H	8319	252	100	+	0	0	519I252M718I	R36	Schwartzia_succinivorans_strain_S1-1_(NR_029325.1)
H	8319	252	100	+	0	0	519I252M718I	R37	Schwartzia_succinivorans_strain_S1-1_(NR_029325.1)						H	8319	252	100	+	0	0	519I252M718I	R37	Schwartzia_succinivorans_strain_S1-1_(NR_029325.1)
H	8319	252	100	+	0	0	519I252M718I	R38	Schwartzia_succinivorans_strain_S1-1_(NR_029325.1)						H	8319	252	100	+	0	0	519I252M718I	R38	Schwartzia_succinivorans_strain_S1-1_(NR_029325.1)
H	8319	252	100	+	0	0	519I252M718I	R39	Schwartzia_succinivorans_strain_S1-1_(NR_029325.1)						H	8319	252	100	+	0	0	519I252M718I	R39	Schwartzia_succinivorans_strain_S1-1_(NR_029325.1)
H	8319	252	100	+	0	0	519I252M718I	R40	Schwartzia_succinivorans_strain_S1-1_(NR_029325.1)						H	8319	252	100	+	0	0	519I252M718I	R40	Schwartzia_succinivorans_strain_S1-1_(NR_029325.1)
H	8319	252	100	+	0	0	519I252M718I	R41	Schwartzia_succinivorans_strain_S1-1_(NR_029325.1)						H	8319	252	100	+	0	0	519I252M718I	R41	Schwartzia_succinivorans_strain_S1-1_(NR_029325.1)
H	8319	252	100	+	0	0	519I252M718I	R42	Schwartzia_succinivorans_strain_S1-1_(NR_029325.1)						H	8319	252	100	+	0	0	519I252M718I	R42	Schwartzia_succinivorans_strain_S1-1_(NR_029325.1)
H	8319	252	100	+	0	0	519I252M718I	R43	Schwartzia_succinivorans_strain_S1-1_(NR_029325.1)						H	8319	252	100	+	0	0	519I252M718I	R43	Schwartzia_succinivorans_strain_S1-1_(NR_029325.1)
H	8319	252	100	+	0	0	519I252M718I	R46	Schwartzia_succinivorans_strain_S1-1_(NR_029325.1)						H	8319	252	100	+	0	0	519I252M718I	R44	Schwartzia_succinivorans_strain_S1-1_(NR_029325.1)
H	8319	252	100	+	0	0	519I252M718I	R48	Schwartzia_succinivorans_strain_S1-1_(NR_029325.1)						H	8319	252	100	+	0	0	519I252M718I	R45	Schwartzia_succinivorans_strain_S1-1_(NR_029325.1)
H	8319	252	100	+	0	0	519I252M718I	R45	Schwartzia_succinivorans_strain_S1-1_(NR_029325.1)						H	8319	252	100	+	0	0	519I252M718I	R46	Schwartzia_succinivorans_strain_S1-1_(NR_029325.1)
H	8319	252	100	+	0	0	519I252M718I	R44	Schwartzia_succinivorans_strain_S1-1_(NR_029325.1)						H	8319	252	100	+	0	0	519I252M718I	R47	Schwartzia_succinivorans_strain_S1-1_(NR_029325.1)
H	8319	252	100	+	0	0	519I252M718I	R47	Schwartzia_succinivorans_strain_S1-1_(NR_029325.1)						H	8319	252	100	+	0	0	519I252M718I	R48	Schwartzia_succinivorans_strain_S1-1_(NR_029325.1)
H	8319	252	100	+	0	0	519I252M718I	R51	Schwartzia_succinivorans_strain_S1-1_(NR_029325.1)						H	8319	252	100	+	0	0	519I252M718I	R49	Schwartzia_succinivorans_strain_S1-1_(NR_029325.1)
H	8319	252	100	+	0	0	519I252M718I	R50	Schwartzia_succinivorans_strain_S1-1_(NR_029325.1)						H	8319	252	100	+	0	0	519I252M718I	R50	Schwartzia_succinivorans_strain_S1-1_(NR_029325.1)
H	8319	252	100	+	0	0	519I252M718I	R52	Schwartzia_succinivorans_strain_S1-1_(NR_029325.1)						H	8319	252	100	+	0	0	519I252M718I	R51	Schwartzia_succinivorans_strain_S1-1_(NR_029325.1)
H	8319	252	100	+	0	0	519I252M718I	R49	Schwartzia_succinivorans_strain_S1-1_(NR_029325.1)						H	8319	252	100	+	0	0	519I252M718I	R52	Schwartzia_succinivorans_strain_S1-1_(NR_029325.1)
H	8319	252	100	+	0	0	519I252M718I	R54	Schwartzia_succinivorans_strain_S1-1_(NR_029325.1)						H	8319	252	100	+	0	0	519I252M718I	R53	Schwartzia_succinivorans_strain_S1-1_(NR_029325.1)
H	8319	252	100	+	0	0	519I252M718I	R53	Schwartzia_succinivorans_strain_S1-1_(NR_029325.1)						H	8319	252	100	+	0	0	519I252M718I	R54	Schwartzia_succinivorans_strain_S1-1_(NR_029325.1)
H	8319	252	100	+	0	0	519I252M718I	R55	Schwartzia_succinivorans_strain_S1-1_(NR_029325.1)						H	8319	252	100	+	0	0	519I252M718I	R55	Schwartzia_succinivorans_strain_S1-1_(NR_029325.1)
H	8319	252	100	+	0	0	519I252M718I	R56	Schwartzia_succinivorans_strain_S1-1_(NR_029325.1)						H	8319	252	100	+	0	0	519I252M718I	R56	Schwartzia_succinivorans_strain_S1-1_(NR_029325.1)
H	8319	252	100	+	0	0	519I252M718I	R58	Schwartzia_succinivorans_strain_S1-1_(NR_029325.1)						H	8319	252	100	+	0	0	519I252M718I	R57	Schwartzia_succinivorans_strain_S1-1_(NR_029325.1)
H	8319	252	100	+	0	0	519I252M718I	R57	Schwartzia_succinivorans_strain_S1-1_(NR_029325.1)						H	8319	252	100	+	0	0	519I252M718I	R58	Schwartzia_succinivorans_strain_S1-1_(NR_029325.1)
H	8319	252	100	+	0	0	519I252M718I	R59	Schwartzia_succinivorans_strain_S1-1_(NR_029325.1)						H	8319	252	100	+	0	0	519I252M718I	R59	Schwartzia_succinivorans_strain_S1-1_(NR_029325.1)
H	8319	252	100	+	0	0	519I252M718I	R60	Schwartzia_succinivorans_strain_S1-1_(NR_029325.1)						H	8319	252	100	+	0	0	519I252M718I	R60	Schwartzia_succinivorans_strain_S1-1_(NR_029325.1)
H	8319	252	100	+	0	0	519I252M718I	R61	Schwartzia_succinivorans_strain_S1-1_(NR_029325.1)						H	8319	252	100	+	0	0	519I252M718I	R61	Schwartzia_succinivorans_strain_S1-1_(NR_029325.1)
H	8319	252	100	+	0	0	519I252M718I	R62	Schwartzia_succinivorans_strain_S1-1_(NR_029325.1)						H	8319	252	100	+	0	0	519I252M718I	R62	Schwartzia_succinivorans_strain_S1-1_(NR_029325.1)
H	8319	252	100	+	0	0	519I252M718I	R63	Schwartzia_succinivorans_strain_S1-1_(NR_029325.1)						H	8319	252	100	+	0	0	519I252M718I	R63	Schwartzia_succinivorans_strain_S1-1_(NR_029325.1)
H	8319	252	100	+	0	0	519I252M718I	R64	Schwartzia_succinivorans_strain_S1-1_(NR_029325.1)						H	8319	252	100	+	0	0	519I252M718I	R64	Schwartzia_succinivorans_strain_S1-1_(NR_029325.1)
H	8319	252	100	+	0	0	519I252M718I	R65	Schwartzia_succinivorans_strain_S1-1_(NR_029325.1)						H	8319	252	100	+	0	0	519I252M718I	R65	Schwartzia_succinivorans_strain_S1-1_(NR_029325.1)
H	8319	252	100	+	0	0	519I252M718I	R67	Schwartzia_succinivorans_strain_S1-1_(NR_029325.1)						H	8319	252	100	+	0	0	519I252M718I	R66	Schwartzia_succinivorans_strain_S1-1_(NR_029325.1)
H	8319	252	100	+	0	0	519I252M718I	R68	Schwartzia_succinivorans_strain_S1-1_(NR_029325.1)						H	8319	252	100	+	0	0	519I252M718I	R67	Schwartzia_succinivorans_strain_S1-1_(NR_029325.1)
H	8319	252	100	+	0	0	519I252M718I	R69	Schwartzia_succinivorans_strain_S1-1_(NR_029325.1)						H	8319	252	100	+	0	0	519I252M718I	R68	Schwartzia_succinivorans_strain_S1-1_(NR_029325.1)
H	8319	252	100	+	0	0	519I252M718I	R66	Schwartzia_succinivorans_strain_S1-1_(NR_029325.1)						H	8319	252	100	+	0	0	519I252M718I	R69	Schwartzia_succinivorans_strain_S1-1_(NR_029325.1)
H	8319	252	100	+	0	0	519I252M718I	R70	Schwartzia_succinivorans_strain_S1-1_(NR_029325.1)						H	8319	252	100	+	0	0	519I252M718I	R70	Schwartzia_succinivorans_strain_S1-1_(NR_029325.1)
H	8319	252	100	+	0	0	519I252M718I	R71	Schwartzia_succinivorans_strain_S1-1_(NR_029325.1)						H	8319	252	100	+	0	0	519I252M718I	R72	Schwartzia_succinivorans_strain_S1-1_(NR_029325.1)
H	8319	252	100	+	0	0	519I252M718I	R72	Schwartzia_succinivorans_strain_S1-1_(NR_029325.1)						H	8319	252	100	+	0	0	519I252M718I	R71	Schwartzia_succinivorans_strain_S1-1_(NR_029325.1)
H	8319	252	100	+	0	0	519I252M718I	R73	Schwartzia_succinivorans_strain_S1-1_(NR_029325.1)						H	8319	252	100	+	0	0	519I252M718I	R73	Schwartzia_succinivorans_strain_S1-1_(NR_029325.1)
H	8319	252	100	+	0	0	519I252M718I	R74	Schwartzia_succinivorans_strain_S1-1_(NR_029325.1)						H	8319	252	100	+	0	0	519I252M718I	R75	Schwartzia_succinivorans_strain_S1-1_(NR_029325.1)
H	8319	252	100	+	0	0	519I252M718I	R75	Schwartzia_succinivorans_strain_S1-1_(NR_029325.1)						H	8319	252	100	+	0	0	519I252M718I	R76	Schwartzia_succinivorans_strain_S1-1_(NR_029325.1)
H	8319	252	100	+	0	0	519I252M718I	R77	Schwartzia_succinivorans_strain_S1-1_(NR_029325.1)						H	8319	252	100	+	0	0	519I252M718I	R74	Schwartzia_succinivorans_strain_S1-1_(NR_029325.1)
H	8319	252	100	+	0	0	519I252M718I	R76	Schwartzia_succinivorans_strain_S1-1_(NR_029325.1)						H	8319	252	100	+	0	0	519I252M718I	R77	Schwartzia_succinivorans_strain_S1-1_(NR_029325.1)
H	8319	252	100	+	0	0	519I252M718I	R78	Schwartzia_succinivorans_strain_S1-1_(NR_029325.1)						H	8319	252	100	+	0	0	519I252M718I	R78	Schwartzia_succinivorans_strain_S1-1_(NR_029325.1)
H	8319	252	100	+	0	0	519I252M718I	R79	Schwartzia_succinivorans_strain_S1-1_(NR_029325.1)						H	2359	253	96.4	+	0	0	528I253M750I	R79	Hydrotalea_sandarakina_strain_AF-51_(NR_109380.1)
H	8319	252	100	+	0	0	519I252M718I	R82	Schwartzia_succinivorans_strain_S1-1_(NR_029325.1)						H	2359	253	96.4	+	0	0	528I253M750I	R80	Hydrotalea_sandarakina_strain_AF-51_(NR_109380.1)
H	8319	252	100	+	0	0	519I252M718I	R81	Schwartzia_succinivorans_strain_S1-1_(NR_029325.1)						H	8319	252	98.8	+	0	0	519I252M718I	R81	Schwartzia_succinivorans_strain_S1-1_(NR_029325.1)
H	8319	252	100	+	0	0	519I252M718I	R80	Schwartzia_succinivorans_strain_S1-1_(NR_029325.1)						H	8319	252	98.8	+	0	0	519I252M718I	R83	Schwartzia_succinivorans_strain_S1-1_(NR_029325.1)
H	8319	252	100	+	0	0	519I252M718I	R84	Schwartzia_succinivorans_strain_S1-1_(NR_029325.1)						H	8319	252	98.8	+	0	0	519I252M718I	R82	Schwartzia_succinivorans_strain_S1-1_(NR_029325.1)
H	8319	252	100	+	0	0	519I252M718I	R83	Schwartzia_succinivorans_strain_S1-1_(NR_029325.1)						H	8319	252	98.8	+	0	0	519I252M718I	R84	Schwartzia_succinivorans_strain_S1-1_(NR_029325.1)
H	8319	252	100	+	0	0	519I252M718I	R86	Schwartzia_succinivorans_strain_S1-1_(NR_029325.1)						H	8319	252	98.8	+	0	0	519I252M718I	R85	Schwartzia_succinivorans_strain_S1-1_(NR_029325.1)
H	8319	252	100	+	0	0	519I252M718I	R87	Schwartzia_succinivorans_strain_S1-1_(NR_029325.1)						H	8319	252	98.8	+	0	0	519I252M718I	R86	Schwartzia_succinivorans_strain_S1-1_(NR_029325.1)
H	8319	252	100	+	0	0	519I252M718I	R88	Schwartzia_succinivorans_strain_S1-1_(NR_029325.1)						H	8319	252	98.8	+	0	0	519I252M718I	R87	Schwartzia_succinivorans_strain_S1-1_(NR_029325.1)
H	8319	252	100	+	0	0	519I252M718I	R89	Schwartzia_succinivorans_strain_S1-1_(NR_029325.1)						H	8319	252	98.8	+	0	0	519I252M718I	R88	Schwartzia_succinivorans_strain_S1-1_(NR_029325.1)
H	8319	252	100	+	0	0	519I252M718I	R85	Schwartzia_succinivorans_strain_S1-1_(NR_029325.1)						H	8319	252	98.8	+	0	0	519I252M718I	R89	Schwartzia_succinivorans_strain_S1-1_(NR_029325.1)
H	8319	252	100	+	0	0	519I252M718I	R91	Schwartzia_succinivorans_strain_S1-1_(NR_029325.1)						H	8319	252	98.8	+	0	0	519I252M718I	R90	Schwartzia_succinivorans_strain_S1-1_(NR_029325.1)
H	8319	252	100	+	0	0	519I252M718I	R92	Schwartzia_succinivorans_strain_S1-1_(NR_029325.1)						H	8319	252	98.8	+	0	0	519I252M718I	R92	Schwartzia_succinivorans_strain_S1-1_(NR_029325.1)
H	8319	252	100	+	0	0	519I252M718I	R93	Schwartzia_succinivorans_strain_S1-1_(NR_029325.1)						H	8319	252	98.8	+	0	0	519I252M718I	R93	Schwartzia_succinivorans_strain_S1-1_(NR_029325.1)
H	8319	252	100	+	0	0	519I252M718I	R94	Schwartzia_succinivorans_strain_S1-1_(NR_029325.1)						H	8319	252	98.8	+	0	0	519I252M718I	R94	Schwartzia_succinivorans_strain_S1-1_(NR_029325.1)
H	8319	252	100	+	0	0	519I252M718I	R90	Schwartzia_succinivorans_strain_S1-1_(NR_029325.1)						H	8319	252	98.8	+	0	0	519I252M718I	R95	Schwartzia_succinivorans_strain_S1-1_(NR_029325.1)
H	8319	252	100	+	0	0	519I252M718I	R98	Schwartzia_succinivorans_strain_S1-1_(NR_029325.1)						H	8319	252	98.8	+	0	0	519I252M718I	R91	Schwartzia_succinivorans_strain_S1-1_(NR_029325.1)
H	8319	252	100	+	0	0	519I252M718I	R95	Schwartzia_succinivorans_strain_S1-1_(NR_029325.1)						H	8319	252	98.8	+	0	0	519I252M718I	R96	Schwartzia_succinivorans_strain_S1-1_(NR_029325.1)
H	8319	252	100	+	0	0	519I252M718I	R97	Schwartzia_succinivorans_strain_S1-1_(NR_029325.1)						H	8319	252	98.8	+	0	0	519I252M718I	R99	Schwartzia_succinivorans_strain_S1-1_(NR_029325.1)
H	8319	252	100	+	0	0	519I252M718I	R99	Schwartzia_succinivorans_strain_S1-1_(NR_029325.1)						H	8319	252	98.8	+	0	0	519I252M718I	R97	Schwartzia_succinivorans_strain_S1-1_(NR_029325.1)
H	8319	252	100	+	0	0	519I252M718I	R100	Schwartzia_succinivorans_strain_S1-1_(NR_029325.1)						H	8319	252	98.8	+	0	0	519I252M718I	R100	Schwartzia_succinivorans_strain_S1-1_(NR_029325.1)
H	8319	252	100	+	0	0	519I252M718I	R101	Schwartzia_succinivorans_strain_S1-1_(NR_029325.1)						H	8319	252	98.8	+	0	0	519I252M718I	R101	Schwartzia_succinivorans_strain_S1-1_(NR_029325.1)
H	8319	252	100	+	0	0	519I252M718I	R102	Schwartzia_succinivorans_strain_S1-1_(NR_029325.1)						H	8319	252	98.8	+	0	0	519I252M718I	R102	Schwartzia_succinivorans_strain_S1-1_(NR_029325.1)
H	8319	252	100	+	0	0	519I252M718I	R103	Schwartzia_succinivorans_strain_S1-1_(NR_029325.1)						H	8319	252	98.8	+	0	0	519I252M718I	R103	Schwartzia_succinivorans_strain_S1-1_(NR_029325.1)
H	8319	252	100	+	0	0	519I252M718I	R104	Schwartzia_succinivorans_strain_S1-1_(NR_029325.1)						H	8319	252	98.8	+	0	0	519I252M718I	R104	Schwartzia_succinivorans_strain_S1-1_(NR_029325.1)
H	8319	252	100	+	0	0	519I252M718I	R105	Schwartzia_succinivorans_strain_S1-1_(NR_029325.1)						H	8319	252	98.8	+	0	0	519I252M718I	R105	Schwartzia_succinivorans_strain_S1-1_(NR_029325.1)
H	8319	252	100	+	0	0	519I252M718I	R106	Schwartzia_succinivorans_strain_S1-1_(NR_029325.1)						H	8319	252	98.8	+	0	0	519I252M718I	R98	Schwartzia_succinivorans_strain_S1-1_(NR_029325.1)
H	8319	252	100	+	0	0	519I252M718I	R107	Schwartzia_succinivorans_strain_S1-1_(NR_029325.1)						H	8319	252	98.8	+	0	0	519I252M718I	R106	Schwartzia_succinivorans_strain_S1-1_(NR_029325.1)
H	8319	252	100	+	0	0	519I252M718I	R108	Schwartzia_succinivorans_strain_S1-1_(NR_029325.1)						H	8319	252	98.8	+	0	0	519I252M718I	R107	Schwartzia_succinivorans_strain_S1-1_(NR_029325.1)
H	8319	252	100	+	0	0	519I252M718I	R109	Schwartzia_succinivorans_strain_S1-1_(NR_029325.1)						H	8319	252	98.8	+	0	0	519I252M718I	R108	Schwartzia_succinivorans_strain_S1-1_(NR_029325.1)
H	8319	252	100	+	0	0	519I252M718I	R110	Schwartzia_succinivorans_strain_S1-1_(NR_029325.1)						H	8319	252	98.8	+	0	0	519I252M718I	R109	Schwartzia_succinivorans_strain_S1-1_(NR_029325.1)
H	8319	252	100	+	0	0	519I252M718I	R111	Schwartzia_succinivorans_strain_S1-1_(NR_029325.1)						H	8319	252	98.8	+	0	0	519I252M718I	R110	Schwartzia_succinivorans_strain_S1-1_(NR_029325.1)
H	8319	252	100	+	0	0	519I252M718I	R112	Schwartzia_succinivorans_strain_S1-1_(NR_029325.1)						H	8319	252	98.8	+	0	0	519I252M718I	R111	Schwartzia_succinivorans_strain_S1-1_(NR_029325.1)
H	8319	252	100	+	0	0	519I252M718I	R113	Schwartzia_succinivorans_strain_S1-1_(NR_029325.1)						H	8319	252	98.8	+	0	0	519I252M718I	R112	Schwartzia_succinivorans_strain_S1-1_(NR_029325.1)
H	8319	252	100	+	0	0	519I252M718I	R114	Schwartzia_succinivorans_strain_S1-1_(NR_029325.1)						H	8319	252	98.8	+	0	0	519I252M718I	R113	Schwartzia_succinivorans_strain_S1-1_(NR_029325.1)
H	8319	252	100	+	0	0	519I252M718I	R115	Schwartzia_succinivorans_strain_S1-1_(NR_029325.1)						H	8319	252	98.8	+	0	0	519I252M718I	R116	Schwartzia_succinivorans_strain_S1-1_(NR_029325.1)
H	8319	252	100	+	0	0	519I252M718I	R116	Schwartzia_succinivorans_strain_S1-1_(NR_029325.1)						H	8319	252	98.8	+	0	0	519I252M718I	R115	Schwartzia_succinivorans_strain_S1-1_(NR_029325.1)
H	8319	252	100	+	0	0	519I252M718I	R117	Schwartzia_succinivorans_strain_S1-1_(NR_029325.1)						H	8319	252	98.8	+	0	0	519I252M718I	R114	Schwartzia_succinivorans_strain_S1-1_(NR_029325.1)
H	8319	252	100	+	0	0	519I252M718I	R118	Schwartzia_succinivorans_strain_S1-1_(NR_029325.1)						H	8319	252	98.8	+	0	0	519I252M718I	R118	Schwartzia_succinivorans_strain_S1-1_(NR_029325.1)
H	8319	252	100	+	0	0	519I252M718I	R119	Schwartzia_succinivorans_strain_S1-1_(NR_029325.1)						H	8319	252	98.8	+	0	0	519I252M718I	R117	Schwartzia_succinivorans_strain_S1-1_(NR_029325.1)
H	8319	252	100	+	0	0	519I252M718I	R120	Schwartzia_succinivorans_strain_S1-1_(NR_029325.1)						H	8319	252	98.8	+	0	0	519I252M718I	R120	Schwartzia_succinivorans_strain_S1-1_(NR_029325.1)
H	8319	252	100	+	0	0	519I252M718I	R121	Schwartzia_succinivorans_strain_S1-1_(NR_029325.1)						H	8319	252	98.8	+	0	0	519I252M718I	R119	Schwartzia_succinivorans_strain_S1-1_(NR_029325.1)
H	8319	252	100	+	0	0	519I252M718I	R122	Schwartzia_succinivorans_strain_S1-1_(NR_029325.1)						H	8319	252	98.8	+	0	0	519I252M718I	R121	Schwartzia_succinivorans_strain_S1-1_(NR_029325.1)
H	8319	252	100	+	0	0	519I252M718I	R96	Schwartzia_succinivorans_strain_S1-1_(NR_029325.1)						H	8319	252	98.8	+	0	0	519I252M718I	R122	Schwartzia_succinivorans_strain_S1-1_(NR_029325.1)
H	8319	252	100	+	0	0	519I252M718I	R123	Schwartzia_succinivorans_strain_S1-1_(NR_029325.1)						H	8319	252	98.8	+	0	0	519I252M718I	R123	Schwartzia_succinivorans_strain_S1-1_(NR_029325.1)
H	8319	252	100	+	0	0	519I252M718I	R124	Schwartzia_succinivorans_strain_S1-1_(NR_029325.1)						H	8319	252	98.8	+	0	0	519I252M718I	R124	Schwartzia_succinivorans_strain_S1-1_(NR_029325.1)
H	8319	252	100	+	0	0	519I252M718I	R125	Schwartzia_succinivorans_strain_S1-1_(NR_029325.1)						H	8319	252	98.8	+	0	0	519I252M718I	R125	Schwartzia_succinivorans_strain_S1-1_(NR_029325.1)
H	8319	252	100	+	0	0	519I252M718I	R126	Schwartzia_succinivorans_strain_S1-1_(NR_029325.1)						H	8319	252	98.8	+	0	0	519I252M718I	R126	Schwartzia_succinivorans_strain_S1-1_(NR_029325.1)
H	8319	252	100	+	0	0	519I252M718I	R127	Schwartzia_succinivorans_strain_S1-1_(NR_029325.1)						H	8319	252	98.8	+	0	0	519I252M718I	R127	Schwartzia_succinivorans_strain_S1-1_(NR_029325.1)
H	8319	252	100	+	0	0	519I252M718I	R128	Schwartzia_succinivorans_strain_S1-1_(NR_029325.1)						H	8319	252	98.8	+	0	0	519I252M718I	R128	Schwartzia_succinivorans_strain_S1-1_(NR_029325.1)
H	8319	252	100	+	0	0	519I252M718I	R129	Schwartzia_succinivorans_strain_S1-1_(NR_029325.1)						H	8319	252	98.8	+	0	0	519I252M718I	R129	Schwartzia_succinivorans_strain_S1-1_(NR_029325.1)
H	8319	252	100	+	0	0	519I252M718I	R132	Schwartzia_succinivorans_strain_S1-1_(NR_029325.1)						H	8319	252	98.8	+	0	0	519I252M718I	R132	Schwartzia_succinivorans_strain_S1-1_(NR_029325.1)
H	8319	252	100	+	0	0	519I252M718I	R130	Schwartzia_succinivorans_strain_S1-1_(NR_029325.1)						H	8319	252	98.8	+	0	0	519I252M718I	R131	Schwartzia_succinivorans_strain_S1-1_(NR_029325.1)
H	8319	252	100	+	0	0	519I252M718I	R135	Schwartzia_succinivorans_strain_S1-1_(NR_029325.1)						H	8319	252	98.8	+	0	0	519I252M718I	R130	Schwartzia_succinivorans_strain_S1-1_(NR_029325.1)
H	8319	252	100	+	0	0	519I252M718I	R133	Schwartzia_succinivorans_strain_S1-1_(NR_029325.1)						H	8319	252	98.8	+	0	0	519I252M718I	R133	Schwartzia_succinivorans_strain_S1-1_(NR_029325.1)
H	8319	252	100	+	0	0	519I252M718I	R131	Schwartzia_succinivorans_strain_S1-1_(NR_029325.1)						H	8319	252	98.8	+	0	0	519I252M718I	R135	Schwartzia_succinivorans_strain_S1-1_(NR_029325.1)
H	8319	252	100	+	0	0	519I252M718I	R134	Schwartzia_succinivorans_strain_S1-1_(NR_029325.1)						H	8319	252	98.8	+	0	0	519I252M718I	R134	Schwartzia_succinivorans_strain_S1-1_(NR_029325.1)
H	8319	252	100	+	0	0	519I252M718I	R136	Schwartzia_succinivorans_strain_S1-1_(NR_029325.1)						H	8319	252	98.8	+	0	0	519I252M718I	R136	Schwartzia_succinivorans_strain_S1-1_(NR_029325.1)
H	8319	252	100	+	0	0	519I252M718I	R137	Schwartzia_succinivorans_strain_S1-1_(NR_029325.1)						H	8319	252	98.8	+	0	0	519I252M718I	R137	Schwartzia_succinivorans_strain_S1-1_(NR_029325.1)
H	8319	252	100	+	0	0	519I252M718I	R138	Schwartzia_succinivorans_strain_S1-1_(NR_029325.1)						H	8319	252	98.8	+	0	0	519I252M718I	R139	Schwartzia_succinivorans_strain_S1-1_(NR_029325.1)
H	8319	252	100	+	0	0	519I252M718I	R140	Schwartzia_succinivorans_strain_S1-1_(NR_029325.1)						H	8319	252	98.8	+	0	0	519I252M718I	R138	Schwartzia_succinivorans_strain_S1-1_(NR_029325.1)
H	8319	252	100	+	0	0	519I252M718I	R141	Schwartzia_succinivorans_strain_S1-1_(NR_029325.1)						H	8319	252	98.8	+	0	0	519I252M718I	R140	Schwartzia_succinivorans_strain_S1-1_(NR_029325.1)
H	8319	252	100	+	0	0	519I252M718I	R142	Schwartzia_succinivorans_strain_S1-1_(NR_029325.1)						H	8319	252	98.8	+	0	0	519I252M718I	R143	Schwartzia_succinivorans_strain_S1-1_(NR_029325.1)
H	8319	252	100	+	0	0	519I252M718I	R139	Schwartzia_succinivorans_strain_S1-1_(NR_029325.1)						H	8319	252	98.8	+	0	0	519I252M718I	R141	Schwartzia_succinivorans_strain_S1-1_(NR_029325.1)
H	8319	252	100	+	0	0	519I252M718I	R143	Schwartzia_succinivorans_strain_S1-1_(NR_029325.1)						H	8319	252	98.8	+	0	0	519I252M718I	R144	Schwartzia_succinivorans_strain_S1-1_(NR_029325.1)
H	8319	252	100	+	0	0	519I252M718I	R144	Schwartzia_succinivorans_strain_S1-1_(NR_029325.1)						H	8319	252	98.8	+	0	0	519I252M718I	R142	Schwartzia_succinivorans_strain_S1-1_(NR_029325.1)
H	8319	252	100	+	0	0	519I252M718I	R145	Schwartzia_succinivorans_strain_S1-1_(NR_029325.1)						H	8319	252	98.8	+	0	0	519I252M718I	R146	Schwartzia_succinivorans_strain_S1-1_(NR_029325.1)
H	8319	252	100	+	0	0	519I252M718I	R146	Schwartzia_succinivorans_strain_S1-1_(NR_029325.1)						H	8319	252	98.8	+	0	0	519I252M718I	R147	Schwartzia_succinivorans_strain_S1-1_(NR_029325.1)
H	8319	252	100	+	0	0	519I252M718I	R147	Schwartzia_succinivorans_strain_S1-1_(NR_029325.1)						H	8319	252	98.8	+	0	0	519I252M718I	R145	Schwartzia_succinivorans_strain_S1-1_(NR_029325.1)
H	8319	252	100	+	0	0	519I252M718I	R148	Schwartzia_succinivorans_strain_S1-1_(NR_029325.1)						H	8319	252	98.8	+	0	0	519I252M718I	R148	Schwartzia_succinivorans_strain_S1-1_(NR_029325.1)
H	8319	252	100	+	0	0	519I252M718I	R149	Schwartzia_succinivorans_strain_S1-1_(NR_029325.1)						H	8319	252	98.8	+	0	0	519I252M718I	R149	Schwartzia_succinivorans_strain_S1-1_(NR_029325.1)
H	8319	252	100	+	0	0	519I252M718I	R150	Schwartzia_succinivorans_strain_S1-1_(NR_029325.1)						H	8319	252	98.8	+	0	0	519I252M718I	R150	Schwartzia_succinivorans_strain_S1-1_(NR_029325.1)
H	8319	252	100	+	0	0	519I252M718I	R153	Schwartzia_succinivorans_strain_S1-1_(NR_029325.1)						H	8319	252	98.8	+	0	0	519I252M718I	R151	Schwartzia_succinivorans_strain_S1-1_(NR_029325.1)
H	8319	252	100	+	0	0	519I252M718I	R152	Schwartzia_succinivorans_strain_S1-1_(NR_029325.1)						H	8319	252	98.8	+	0	0	519I252M718I	R152	Schwartzia_succinivorans_strain_S1-1_(NR_029325.1)
H	8319	252	100	+	0	0	519I252M718I	R154	Schwartzia_succinivorans_strain_S1-1_(NR_029325.1)						H	8319	252	98.8	+	0	0	519I252M718I	R153	Schwartzia_succinivorans_strain_S1-1_(NR_029325.1)
H	8319	252	100	+	0	0	519I252M718I	R151	Schwartzia_succinivorans_strain_S1-1_(NR_029325.1)						H	8319	252	98.8	+	0	0	519I252M718I	R154	Schwartzia_succinivorans_strain_S1-1_(NR_029325.1)
H	8319	252	100	+	0	0	519I252M718I	R155	Schwartzia_succinivorans_strain_S1-1_(NR_029325.1)						H	8319	252	98.8	+	0	0	519I252M718I	R155	Schwartzia_succinivorans_strain_S1-1_(NR_029325.1)
H	8319	252	100	+	0	0	519I252M718I	R156	Schwartzia_succinivorans_strain_S1-1_(NR_029325.1)						H	8319	252	98.8	+	0	0	519I252M718I	R156	Schwartzia_succinivorans_strain_S1-1_(NR_029325.1)
H	8319	252	100	+	0	0	519I252M718I	R157	Schwartzia_succinivorans_strain_S1-1_(NR_029325.1)						H	8319	252	98.8	+	0	0	519I252M718I	R158	Schwartzia_succinivorans_strain_S1-1_(NR_029325.1)
H	8319	252	100	+	0	0	519I252M718I	R158	Schwartzia_succinivorans_strain_S1-1_(NR_029325.1)						H	8319	252	98.8	+	0	0	519I252M718I	R159	Schwartzia_succinivorans_strain_S1-1_(NR_029325.1)
H	8319	252	100	+	0	0	519I252M718I	R159	Schwartzia_succinivorans_strain_S1-1_(NR_029325.1)						H	8319	252	98.8	+	0	0	519I252M718I	R157	Schwartzia_succinivorans_strain_S1-1_(NR_029325.1)
H	8319	252	100	+	0	0	519I252M718I	R160	Schwartzia_succinivorans_strain_S1-1_(NR_029325.1)						H	8319	252	98.8	+	0	0	519I252M718I	R160	Schwartzia_succinivorans_strain_S1-1_(NR_029325.1)
H	8319	252	100	+	0	0	519I252M718I	R161	Schwartzia_succinivorans_strain_S1-1_(NR_029325.1)						H	8319	252	98.8	+	0	0	519I252M718I	R161	Schwartzia_succinivorans_strain_S1-1_(NR_029325.1)
H	8319	252	100	+	0	0	519I252M718I	R164	Schwartzia_succinivorans_strain_S1-1_(NR_029325.1)						H	8319	252	98.8	+	0	0	519I252M718I	R162	Schwartzia_succinivorans_strain_S1-1_(NR_029325.1)
H	8319	252	100	+	0	0	519I252M718I	R163	Schwartzia_succinivorans_strain_S1-1_(NR_029325.1)						H	8319	252	98.8	+	0	0	519I252M718I	R164	Schwartzia_succinivorans_strain_S1-1_(NR_029325.1)
H	8319	252	100	+	0	0	519I252M718I	R165	Schwartzia_succinivorans_strain_S1-1_(NR_029325.1)						H	8319	252	98.8	+	0	0	519I252M718I	R163	Schwartzia_succinivorans_strain_S1-1_(NR_029325.1)
H	8319	252	100	+	0	0	519I252M718I	R162	Schwartzia_succinivorans_strain_S1-1_(NR_029325.1)						H	8319	252	98.8	+	0	0	519I252M718I	R165	Schwartzia_succinivorans_strain_S1-1_(NR_029325.1)
H	8319	252	100	+	0	0	519I252M718I	R166	Schwartzia_succinivorans_strain_S1-1_(NR_029325.1)						H	8319	252	98.8	+	0	0	519I252M718I	R166	Schwartzia_succinivorans_strain_S1-1_(NR_029325.1)
H	8319	252	100	+	0	0	519I252M718I	R167	Schwartzia_succinivorans_strain_S1-1_(NR_029325.1)						H	8319	252	98.8	+	0	0	519I252M718I	R168	Schwartzia_succinivorans_strain_S1-1_(NR_029325.1)
H	8319	252	100	+	0	0	519I252M718I	R169	Schwartzia_succinivorans_strain_S1-1_(NR_029325.1)						H	8319	252	98.8	+	0	0	519I252M718I	R167	Schwartzia_succinivorans_strain_S1-1_(NR_029325.1)
H	8319	252	100	+	0	0	519I252M718I	R168	Schwartzia_succinivorans_strain_S1-1_(NR_029325.1)						H	8319	252	98.8	+	0	0	519I252M718I	R169	Schwartzia_succinivorans_strain_S1-1_(NR_029325.1)
H	8319	252	100	+	0	0	519I252M718I	R171	Schwartzia_succinivorans_strain_S1-1_(NR_029325.1)						H	8319	252	98.8	+	0	0	519I252M718I	R170	Schwartzia_succinivorans_strain_S1-1_(NR_029325.1)
H	8319	252	100	+	0	0	519I252M718I	R170	Schwartzia_succinivorans_strain_S1-1_(NR_029325.1)						H	8319	252	98.8	+	0	0	519I252M718I	R171	Schwartzia_succinivorans_strain_S1-1_(NR_029325.1)
H	8319	252	100	+	0	0	519I252M718I	R172	Schwartzia_succinivorans_strain_S1-1_(NR_029325.1)						H	8319	252	98.8	+	0	0	519I252M718I	R172	Schwartzia_succinivorans_strain_S1-1_(NR_029325.1)
H	8319	252	100	+	0	0	519I252M718I	R173	Schwartzia_succinivorans_strain_S1-1_(NR_029325.1)						H	8319	252	98.8	+	0	0	519I252M718I	R173	Schwartzia_succinivorans_strain_S1-1_(NR_029325.1)
H	8319	252	100	+	0	0	519I252M718I	R174	Schwartzia_succinivorans_strain_S1-1_(NR_029325.1)						H	8319	252	98.8	+	0	0	519I252M718I	R174	Schwartzia_succinivorans_strain_S1-1_(NR_029325.1)
H	8319	252	100	+	0	0	519I252M718I	R175	Schwartzia_succinivorans_strain_S1-1_(NR_029325.1)						H	8319	252	98.8	+	0	0	519I252M718I	R175	Schwartzia_succinivorans_strain_S1-1_(NR_029325.1)
H	8319	252	100	+	0	0	519I252M718I	R177	Schwartzia_succinivorans_strain_S1-1_(NR_029325.1)						H	8319	252	98.8	+	0	0	519I252M718I	R176	Schwartzia_succinivorans_strain_S1-1_(NR_029325.1)
H	8319	252	100	+	0	0	519I252M718I	R178	Schwartzia_succinivorans_strain_S1-1_(NR_029325.1)						H	8319	252	98.8	+	0	0	519I252M718I	R177	Schwartzia_succinivorans_strain_S1-1_(NR_029325.1)
H	8319	252	100	+	0	0	519I252M718I	R180	Schwartzia_succinivorans_strain_S1-1_(NR_029325.1)						H	8319	252	98.8	+	0	0	519I252M718I	R178	Schwartzia_succinivorans_strain_S1-1_(NR_029325.1)
H	8319	252	100	+	0	0	519I252M718I	R179	Schwartzia_succinivorans_strain_S1-1_(NR_029325.1)						H	8319	252	98.8	+	0	0	519I252M718I	R179	Schwartzia_succinivorans_strain_S1-1_(NR_029325.1)
H	8319	252	100	+	0	0	519I252M718I	R176	Schwartzia_succinivorans_strain_S1-1_(NR_029325.1)						H	8319	252	98.8	+	0	0	519I252M718I	R180	Schwartzia_succinivorans_strain_S1-1_(NR_029325.1)
H	8319	252	100	+	0	0	519I252M718I	R181	Schwartzia_succinivorans_strain_S1-1_(NR_029325.1)						H	8319	252	98.8	+	0	0	519I252M718I	R181	Schwartzia_succinivorans_strain_S1-1_(NR_029325.1)
H	8319	252	100	+	0	0	519I252M718I	R184	Schwartzia_succinivorans_strain_S1-1_(NR_029325.1)						H	8319	252	98.8	+	0	0	519I252M718I	R182	Schwartzia_succinivorans_strain_S1-1_(NR_029325.1)
H	8319	252	100	+	0	0	519I252M718I	R183	Schwartzia_succinivorans_strain_S1-1_(NR_029325.1)						H	8319	252	98.8	+	0	0	519I252M718I	R183	Schwartzia_succinivorans_strain_S1-1_(NR_029325.1)
H	8319	252	100	+	0	0	519I252M718I	R185	Schwartzia_succinivorans_strain_S1-1_(NR_029325.1)						H	8319	252	98.8	+	0	0	519I252M718I	R186	Schwartzia_succinivorans_strain_S1-1_(NR_029325.1)
H	8319	252	100	+	0	0	519I252M718I	R186	Schwartzia_succinivorans_strain_S1-1_(NR_029325.1)						H	8319	252	98.8	+	0	0	519I252M718I	R185	Schwartzia_succinivorans_strain_S1-1_(NR_029325.1)
H	8319	252	100	+	0	0	519I252M718I	R187	Schwartzia_succinivorans_strain_S1-1_(NR_029325.1)						H	8319	252	98.8	+	0	0	519I252M718I	R184	Schwartzia_succinivorans_strain_S1-1_(NR_029325.1)
H	8319	252	100	+	0	0	519I252M718I	R188	Schwartzia_succinivorans_strain_S1-1_(NR_029325.1)						H	8319	252	98.8	+	0	0	519I252M718I	R187	Schwartzia_succinivorans_strain_S1-1_(NR_029325.1)
H	8319	252	100	+	0	0	519I252M718I	R189	Schwartzia_succinivorans_strain_S1-1_(NR_029325.1)						H	8319	252	98.8	+	0	0	519I252M718I	R189	Schwartzia_succinivorans_strain_S1-1_(NR_029325.1)
H	8319	252	100	+	0	0	519I252M718I	R190	Schwartzia_succinivorans_strain_S1-1_(NR_029325.1)						H	8319	252	98.8	+	0	0	519I252M718I	R190	Schwartzia_succinivorans_strain_S1-1_(NR_029325.1)
H	8319	252	100	+	0	0	519I252M718I	R191	Schwartzia_succinivorans_strain_S1-1_(NR_029325.1)						H	8319	252	98.8	+	0	0	519I252M718I	R191	Schwartzia_succinivorans_strain_S1-1_(NR_029325.1)
H	8319	252	100	+	0	0	519I252M718I	R192	Schwartzia_succinivorans_strain_S1-1_(NR_029325.1)						H	8319	252	98.8	+	0	0	519I252M718I	R188	Schwartzia_succinivorans_strain_S1-1_(NR_029325.1)
H	8319	252	100	+	0	0	519I252M718I	R193	Schwartzia_succinivorans_strain_S1-1_(NR_029325.1)						H	8319	252	98.8	+	0	0	519I252M718I	R192	Schwartzia_succinivorans_strain_S1-1_(NR_029325.1)
H	8319	252	100	+	0	0	519I252M718I	R194	Schwartzia_succinivorans_strain_S1-1_(NR_029325.1)						H	8319	252	98.8	+	0	0	519I252M718I	R193	Schwartzia_succinivorans_strain_S1-1_(NR_029325.1)
H	8319	252	100	+	0	0	519I252M718I	R195	Schwartzia_succinivorans_strain_S1-1_(NR_029325.1)						H	8319	252	98.8	+	0	0	519I252M718I	R194	Schwartzia_succinivorans_strain_S1-1_(NR_029325.1)
H	8319	252	100	+	0	0	519I252M718I	R196	Schwartzia_succinivorans_strain_S1-1_(NR_029325.1)						H	8319	252	98.8	+	0	0	519I252M718I	R195	Schwartzia_succinivorans_strain_S1-1_(NR_029325.1)
H	8319	252	100	+	0	0	519I252M718I	R197	Schwartzia_succinivorans_strain_S1-1_(NR_029325.1)						H	8319	252	98.8	+	0	0	519I252M718I	R196	Schwartzia_succinivorans_strain_S1-1_(NR_029325.1)
H	8319	252	100	+	0	0	519I252M718I	R198	Schwartzia_succinivorans_strain_S1-1_(NR_029325.1)						H	8319	252	98.8	+	0	0	519I252M718I	R197	Schwartzia_succinivorans_strain_S1-1_(NR_029325.1)
H	8319	252	100	+	0	0	519I252M718I	R199	Schwartzia_succinivorans_strain_S1-1_(NR_029325.1)						H	8319	252	98.8	+	0	0	519I252M718I	R198	Schwartzia_succinivorans_strain_S1-1_(NR_029325.1)
H	8319	252	100	+	0	0	519I252M718I	R200	Schwartzia_succinivorans_strain_S1-1_(NR_029325.1)						H	8319	252	98.8	+	0	0	519I252M718I	R199	Schwartzia_succinivorans_strain_S1-1_(NR_029325.1)
H	8319	252	100	+	0	0	519I252M718I	R201	Schwartzia_succinivorans_strain_S1-1_(NR_029325.1)						H	8319	252	98.8	+	0	0	519I252M718I	R200	Schwartzia_succinivorans_strain_S1-1_(NR_029325.1)
H	8319	252	100	+	0	0	519I252M718I	R203	Schwartzia_succinivorans_strain_S1-1_(NR_029325.1)						H	8319	252	98.8	+	0	0	519I252M718I	R201	Schwartzia_succinivorans_strain_S1-1_(NR_029325.1)
H	8319	252	100	+	0	0	519I252M718I	R202	Schwartzia_succinivorans_strain_S1-1_(NR_029325.1)						H	8319	252	98.8	+	0	0	519I252M718I	R202	Schwartzia_succinivorans_strain_S1-1_(NR_029325.1)
H	8319	252	100	+	0	0	519I252M718I	R204	Schwartzia_succinivorans_strain_S1-1_(NR_029325.1)						H	8319	252	98.8	+	0	0	519I252M718I	R203	Schwartzia_succinivorans_strain_S1-1_(NR_029325.1)
H	8319	252	100	+	0	0	519I252M718I	R205	Schwartzia_succinivorans_strain_S1-1_(NR_029325.1)						H	8319	252	98.8	+	0	0	519I252M718I	R204	Schwartzia_succinivorans_strain_S1-1_(NR_029325.1)
H	8319	252	100	+	0	0	519I252M718I	R182	Schwartzia_succinivorans_strain_S1-1_(NR_029325.1)						H	8319	252	98.8	+	0	0	519I252M718I	R205	Schwartzia_succinivorans_strain_S1-1_(NR_029325.1)
H	8319	252	100	+	0	0	519I252M718I	R206	Schwartzia_succinivorans_strain_S1-1_(NR_029325.1)						H	8319	252	98.8	+	0	0	519I252M718I	R206	Schwartzia_succinivorans_strain_S1-1_(NR_029325.1)
H	8319	252	100	+	0	0	519I252M718I	R207	Schwartzia_succinivorans_strain_S1-1_(NR_029325.1)						H	8319	252	98.8	+	0	0	519I252M718I	R207	Schwartzia_succinivorans_strain_S1-1_(NR_029325.1)
H	8319	252	100	+	0	0	519I252M718I	R208	Schwartzia_succinivorans_strain_S1-1_(NR_029325.1)						H	8319	252	98.8	+	0	0	519I252M718I	R208	Schwartzia_succinivorans_strain_S1-1_(NR_029325.1)
H	8319	252	100	+	0	0	519I252M718I	R210	Schwartzia_succinivorans_strain_S1-1_(NR_029325.1)						H	8319	252	98.8	+	0	0	519I252M718I	R209	Schwartzia_succinivorans_strain_S1-1_(NR_029325.1)
H	8319	252	100	+	0	0	519I252M718I	R209	Schwartzia_succinivorans_strain_S1-1_(NR_029325.1)						H	8319	252	98.8	+	0	0	519I252M718I	R210	Schwartzia_succinivorans_strain_S1-1_(NR_029325.1)
H	8319	252	100	+	0	0	519I252M718I	R211	Schwartzia_succinivorans_strain_S1-1_(NR_029325.1)						H	8319	252	98.8	+	0	0	519I252M718I	R211	Schwartzia_succinivorans_strain_S1-1_(NR_029325.1)
H	8319	252	100	+	0	0	519I252M718I	R212	Schwartzia_succinivorans_strain_S1-1_(NR_029325.1)						H	8319	252	98.8	+	0	0	519I252M718I	R212	Schwartzia_succinivorans_strain_S1-1_(NR_029325.1)
H	8319	252	100	+	0	0	519I252M718I	R213	Schwartzia_succinivorans_strain_S1-1_(NR_029325.1)						H	8319	252	98.8	+	0	0	519I252M718I	R215	Schwartzia_succinivorans_strain_S1-1_(NR_029325.1)
H	8319	252	100	+	0	0	519I252M718I	R214	Schwartzia_succinivorans_strain_S1-1_(NR_029325.1)						H	8319	252	98.8	+	0	0	519I252M718I	R214	Schwartzia_succinivorans_strain_S1-1_(NR_029325.1)
H	8319	252	100	+	0	0	519I252M718I	R217	Schwartzia_succinivorans_strain_S1-1_(NR_029325.1)						H	8319	252	98.8	+	0	0	519I252M718I	R213	Schwartzia_succinivorans_strain_S1-1_(NR_029325.1)
H	8319	252	100	+	0	0	519I252M718I	R218	Schwartzia_succinivorans_strain_S1-1_(NR_029325.1)						H	8319	252	98.8	+	0	0	519I252M718I	R216	Schwartzia_succinivorans_strain_S1-1_(NR_029325.1)
H	8319	252	100	+	0	0	519I252M718I	R220	Schwartzia_succinivorans_strain_S1-1_(NR_029325.1)						H	8319	252	98.8	+	0	0	519I252M718I	R217	Schwartzia_succinivorans_strain_S1-1_(NR_029325.1)
H	8319	252	100	+	0	0	519I252M718I	R216	Schwartzia_succinivorans_strain_S1-1_(NR_029325.1)						H	8319	252	98.8	+	0	0	519I252M718I	R218	Schwartzia_succinivorans_strain_S1-1_(NR_029325.1)
H	8319	252	100	+	0	0	519I252M718I	R215	Schwartzia_succinivorans_strain_S1-1_(NR_029325.1)						H	8319	252	98.8	+	0	0	519I252M718I	R219	Schwartzia_succinivorans_strain_S1-1_(NR_029325.1)
H	8319	252	100	+	0	0	519I252M718I	R222	Schwartzia_succinivorans_strain_S1-1_(NR_029325.1)						H	8319	252	98.8	+	0	0	519I252M718I	R220	Schwartzia_succinivorans_strain_S1-1_(NR_029325.1)
H	8319	252	100	+	0	0	519I252M718I	R221	Schwartzia_succinivorans_strain_S1-1_(NR_029325.1)						H	8319	252	98.8	+	0	0	519I252M718I	R221	Schwartzia_succinivorans_strain_S1-1_(NR_029325.1)
H	8319	252	100	+	0	0	519I252M718I	R219	Schwartzia_succinivorans_strain_S1-1_(NR_029325.1)						H	8319	252	98.8	+	0	0	519I252M718I	R222	Schwartzia_succinivorans_strain_S1-1_(NR_029325.1)
H	8319	252	100	+	0	0	519I252M718I	R223	Schwartzia_succinivorans_strain_S1-1_(NR_029325.1)						H	8319	252	98.8	+	0	0	519I252M718I	R223	Schwartzia_succinivorans_strain_S1-1_(NR_029325.1)
H	8319	252	100	+	0	0	519I252M718I	R224	Schwartzia_succinivorans_strain_S1-1_(NR_029325.1)						H	8319	252	98.8	+	0	0	519I252M718I	R224	Schwartzia_succinivorans_strain_S1-1_(NR_029325.1)
H	8319	252	100	+	0	0	519I252M718I	R226	Schwartzia_succinivorans_strain_S1-1_(NR_029325.1)						H	8319	252	98.8	+	0	0	519I252M718I	R225	Schwartzia_succinivorans_strain_S1-1_(NR_029325.1)
H	8319	252	100	+	0	0	519I252M718I	R225	Schwartzia_succinivorans_strain_S1-1_(NR_029325.1)						H	8319	252	98.8	+	0	0	519I252M718I	R226	Schwartzia_succinivorans_strain_S1-1_(NR_029325.1)
H	8319	252	100	+	0	0	519I252M718I	R227	Schwartzia_succinivorans_strain_S1-1_(NR_029325.1)						H	8319	252	98.8	+	0	0	519I252M718I	R228	Schwartzia_succinivorans_strain_S1-1_(NR_029325.1)
H	8319	252	100	+	0	0	519I252M718I	R228	Schwartzia_succinivorans_strain_S1-1_(NR_029325.1)						H	8319	252	98.8	+	0	0	519I252M718I	R227	Schwartzia_succinivorans_strain_S1-1_(NR_029325.1)
H	8319	252	100	+	0	0	519I252M718I	R229	Schwartzia_succinivorans_strain_S1-1_(NR_029325.1)						H	8319	252	98.8	+	0	0	519I252M718I	R229	Schwartzia_succinivorans_strain_S1-1_(NR_029325.1)
H	8319	252	100	+	0	0	519I252M718I	R230	Schwartzia_succinivorans_strain_S1-1_(NR_029325.1)						H	8319	252	98.8	+	0	0	519I252M718I	R230	Schwartzia_succinivorans_strain_S1-1_(NR_029325.1)
H	8319	252	100	+	0	0	519I252M718I	R231	Schwartzia_succinivorans_strain_S1-1_(NR_029325.1)						H	8319	252	98.8	+	0	0	519I252M718I	R232	Schwartzia_succinivorans_strain_S1-1_(NR_029325.1)
H	8319	252	100	+	0	0	519I252M718I	R232	Schwartzia_succinivorans_strain_S1-1_(NR_029325.1)						H	8319	252	98.8	+	0	0	519I252M718I	R231	Schwartzia_succinivorans_strain_S1-1_(NR_029325.1)
H	8319	252	100	+	0	0	519I252M718I	R234	Schwartzia_succinivorans_strain_S1-1_(NR_029325.1)						H	8319	252	98.8	+	0	0	519I252M718I	R233	Schwartzia_succinivorans_strain_S1-1_(NR_029325.1)
H	8319	252	100	+	0	0	519I252M718I	R233	Schwartzia_succinivorans_strain_S1-1_(NR_029325.1)						H	8319	252	98.8	+	0	0	519I252M718I	R234	Schwartzia_succinivorans_strain_S1-1_(NR_029325.1)
H	8319	252	100	+	0	0	519I252M718I	R235	Schwartzia_succinivorans_strain_S1-1_(NR_029325.1)						H	8319	252	98.8	+	0	0	519I252M718I	R236	Schwartzia_succinivorans_strain_S1-1_(NR_029325.1)
H	8319	252	100	+	0	0	519I252M718I	R238	Schwartzia_succinivorans_strain_S1-1_(NR_029325.1)						H	8319	252	98.8	+	0	0	519I252M718I	R237	Schwartzia_succinivorans_strain_S1-1_(NR_029325.1)
H	8319	252	100	+	0	0	519I252M718I	R236	Schwartzia_succinivorans_strain_S1-1_(NR_029325.1)						H	8319	252	98.8	+	0	0	519I252M718I	R235	Schwartzia_succinivorans_strain_S1-1_(NR_029325.1)
H	8319	252	100	+	0	0	519I252M718I	R237	Schwartzia_succinivorans_strain_S1-1_(NR_029325.1)						H	8319	252	98.8	+	0	0	519I252M718I	R238	Schwartzia_succinivorans_strain_S1-1_(NR_029325.1)
H	8319	252	100	+	0	0	519I252M718I	R239	Schwartzia_succinivorans_strain_S1-1_(NR_029325.1)						H	8319	252	98.8	+	0	0	519I252M718I	R239	Schwartzia_succinivorans_strain_S1-1_(NR_029325.1)
H	8319	252	100	+	0	0	519I252M718I	R242	Schwartzia_succinivorans_strain_S1-1_(NR_029325.1)						H	8319	252	98.8	+	0	0	519I252M718I	R240	Schwartzia_succinivorans_strain_S1-1_(NR_029325.1)
H	8319	252	100	+	0	0	519I252M718I	R240	Schwartzia_succinivorans_strain_S1-1_(NR_029325.1)						H	8319	252	98.8	+	0	0	519I252M718I	R241	Schwartzia_succinivorans_strain_S1-1_(NR_029325.1)
H	8319	252	100	+	0	0	519I252M718I	R243	Schwartzia_succinivorans_strain_S1-1_(NR_029325.1)						H	8319	252	98.8	+	0	0	519I252M718I	R242	Schwartzia_succinivorans_strain_S1-1_(NR_029325.1)
H	8319	252	100	+	0	0	519I252M718I	R241	Schwartzia_succinivorans_strain_S1-1_(NR_029325.1)						H	8319	252	98.8	+	0	0	519I252M718I	R243	Schwartzia_succinivorans_strain_S1-1_(NR_029325.1)
H	8319	252	100	+	0	0	519I252M718I	R245	Schwartzia_succinivorans_strain_S1-1_(NR_029325.1)						H	8319	252	98.8	+	0	0	519I252M718I	R244	Schwartzia_succinivorans_strain_S1-1_(NR_029325.1)
H	8319	252	100	+	0	0	519I252M718I	R246	Schwartzia_succinivorans_strain_S1-1_(NR_029325.1)						H	8319	252	98.8	+	0	0	519I252M718I	R247	Schwartzia_succinivorans_strain_S1-1_(NR_029325.1)
H	8319	252	100	+	0	0	519I252M718I	R244	Schwartzia_succinivorans_strain_S1-1_(NR_029325.1)						H	8319	252	98.8	+	0	0	519I252M718I	R245	Schwartzia_succinivorans_strain_S1-1_(NR_029325.1)
H	8319	252	100	+	0	0	519I252M718I	R247	Schwartzia_succinivorans_strain_S1-1_(NR_029325.1)						H	8319	252	98.8	+	0	0	519I252M718I	R248	Schwartzia_succinivorans_strain_S1-1_(NR_029325.1)
H	8319	252	100	+	0	0	519I252M718I	R248	Schwartzia_succinivorans_strain_S1-1_(NR_029325.1)						H	8319	252	98.8	+	0	0	519I252M718I	R246	Schwartzia_succinivorans_strain_S1-1_(NR_029325.1)
H	8319	252	100	+	0	0	519I252M718I	R249	Schwartzia_succinivorans_strain_S1-1_(NR_029325.1)						H	8319	252	98.8	+	0	0	519I252M718I	R249	Schwartzia_succinivorans_strain_S1-1_(NR_029325.1)
H	8319	252	100	+	0	0	519I252M718I	R251	Schwartzia_succinivorans_strain_S1-1_(NR_029325.1)						H	8319	252	98.8	+	0	0	519I252M718I	R251	Schwartzia_succinivorans_strain_S1-1_(NR_029325.1)
H	8319	252	100	+	0	0	519I252M718I	R252	Schwartzia_succinivorans_strain_S1-1_(NR_029325.1)						H	8319	252	98.8	+	0	0	519I252M718I	R250	Schwartzia_succinivorans_strain_S1-1_(NR_029325.1)
H	8319	252	100	+	0	0	519I252M718I	R253	Schwartzia_succinivorans_strain_S1-1_(NR_029325.1)						H	8319	252	98.8	+	0	0	519I252M718I	R252	Schwartzia_succinivorans_strain_S1-1_(NR_029325.1)
H	8319	252	100	+	0	0	519I252M718I	R250	Schwartzia_succinivorans_strain_S1-1_(NR_029325.1)						H	8319	252	98.8	+	0	0	519I252M718I	R254	Schwartzia_succinivorans_strain_S1-1_(NR_029325.1)
H	8319	252	100	+	0	0	519I252M718I	R255	Schwartzia_succinivorans_strain_S1-1_(NR_029325.1)						H	8319	252	98.8	+	0	0	519I252M718I	R255	Schwartzia_succinivorans_strain_S1-1_(NR_029325.1)
H	8319	252	100	+	0	0	519I252M718I	R254	Schwartzia_succinivorans_strain_S1-1_(NR_029325.1)						H	8319	252	98.8	+	0	0	519I252M718I	R256	Schwartzia_succinivorans_strain_S1-1_(NR_029325.1)
H	8319	252	100	+	0	0	519I252M718I	R256	Schwartzia_succinivorans_strain_S1-1_(NR_029325.1)						H	8319	252	98.8	+	0	0	519I252M718I	R253	Schwartzia_succinivorans_strain_S1-1_(NR_029325.1)
H	8319	252	100	+	0	0	519I252M718I	R258	Schwartzia_succinivorans_strain_S1-1_(NR_029325.1)						H	8319	252	98.8	+	0	0	519I252M718I	R257	Schwartzia_succinivorans_strain_S1-1_(NR_029325.1)
H	8319	252	100	+	0	0	519I252M718I	R259	Schwartzia_succinivorans_strain_S1-1_(NR_029325.1)						H	8319	252	98.8	+	0	0	519I252M718I	R259	Schwartzia_succinivorans_strain_S1-1_(NR_029325.1)
H	8319	252	100	+	0	0	519I252M718I	R257	Schwartzia_succinivorans_strain_S1-1_(NR_029325.1)						H	8319	252	98.8	+	0	0	519I252M718I	R258	Schwartzia_succinivorans_strain_S1-1_(NR_029325.1)
H	8319	252	100	+	0	0	519I252M718I	R260	Schwartzia_succinivorans_strain_S1-1_(NR_029325.1)						H	8319	252	98.8	+	0	0	519I252M718I	R261	Schwartzia_succinivorans_strain_S1-1_(NR_029325.1)
H	8319	252	100	+	0	0	519I252M718I	R262	Schwartzia_succinivorans_strain_S1-1_(NR_029325.1)						H	8319	252	98.8	+	0	0	519I252M718I	R260	Schwartzia_succinivorans_strain_S1-1_(NR_029325.1)
H	8319	252	100	+	0	0	519I252M718I	R263	Schwartzia_succinivorans_strain_S1-1_(NR_029325.1)						H	8319	252	98.8	+	0	0	519I252M718I	R262	Schwartzia_succinivorans_strain_S1-1_(NR_029325.1)
H	8319	252	100	+	0	0	519I252M718I	R261	Schwartzia_succinivorans_strain_S1-1_(NR_029325.1)						H	8319	252	98.8	+	0	0	519I252M718I	R263	Schwartzia_succinivorans_strain_S1-1_(NR_029325.1)
H	8319	252	100	+	0	0	519I252M718I	R264	Schwartzia_succinivorans_strain_S1-1_(NR_029325.1)						H	8319	252	98.8	+	0	0	519I252M718I	R264	Schwartzia_succinivorans_strain_S1-1_(NR_029325.1)
H	8319	252	100	+	0	0	519I252M718I	R266	Schwartzia_succinivorans_strain_S1-1_(NR_029325.1)						H	8319	252	98.8	+	0	0	519I252M718I	R265	Schwartzia_succinivorans_strain_S1-1_(NR_029325.1)
H	8319	252	100	+	0	0	519I252M718I	R265	Schwartzia_succinivorans_strain_S1-1_(NR_029325.1)						H	8319	252	98.8	+	0	0	519I252M718I	R266	Schwartzia_succinivorans_strain_S1-1_(NR_029325.1)
H	8319	252	100	+	0	0	519I252M718I	R268	Schwartzia_succinivorans_strain_S1-1_(NR_029325.1)						H	8319	252	98.8	+	0	0	519I252M718I	R267	Schwartzia_succinivorans_strain_S1-1_(NR_029325.1)
H	8319	252	100	+	0	0	519I252M718I	R267	Schwartzia_succinivorans_strain_S1-1_(NR_029325.1)						H	8319	252	98.8	+	0	0	519I252M718I	R268	Schwartzia_succinivorans_strain_S1-1_(NR_029325.1)
H	8319	252	100	+	0	0	519I252M718I	R269	Schwartzia_succinivorans_strain_S1-1_(NR_029325.1)						H	8319	252	98.8	+	0	0	519I252M718I	R269	Schwartzia_succinivorans_strain_S1-1_(NR_029325.1)
H	8319	252	100	+	0	0	519I252M718I	R270	Schwartzia_succinivorans_strain_S1-1_(NR_029325.1)						H	8319	252	98.8	+	0	0	519I252M718I	R270	Schwartzia_succinivorans_strain_S1-1_(NR_029325.1)
H	8319	252	100	+	0	0	519I252M718I	R271	Schwartzia_succinivorans_strain_S1-1_(NR_029325.1)						H	8319	252	98.8	+	0	0	519I252M718I	R271	Schwartzia_succinivorans_strain_S1-1_(NR_029325.1)
H	8319	252	100	+	0	0	519I252M718I	R272	Schwartzia_succinivorans_strain_S1-1_(NR_029325.1)						H	8319	252	98.8	+	0	0	519I252M718I	R272	Schwartzia_succinivorans_strain_S1-1_(NR_029325.1)
H	8319	252	100	+	0	0	519I252M718I	R273	Schwartzia_succinivorans_strain_S1-1_(NR_029325.1)						H	8319	252	98.8	+	0	0	519I252M718I	R273	Schwartzia_succinivorans_strain_S1-1_(NR_029325.1)
H	8319	252	100	+	0	0	519I252M718I	R274	Schwartzia_succinivorans_strain_S1-1_(NR_029325.1)						H	8319	252	98.8	+	0	0	519I252M718I	R274	Schwartzia_succinivorans_strain_S1-1_(NR_029325.1)
H	8319	252	100	+	0	0	519I252M718I	R275	Schwartzia_succinivorans_strain_S1-1_(NR_029325.1)						H	8319	252	98.8	+	0	0	519I252M718I	R275	Schwartzia_succinivorans_strain_S1-1_(NR_029325.1)
H	8319	252	100	+	0	0	519I252M718I	R276	Schwartzia_succinivorans_strain_S1-1_(NR_029325.1)						H	8319	252	98.8	+	0	0	519I252M718I	R276	Schwartzia_succinivorans_strain_S1-1_(NR_029325.1)
H	8319	252	100	+	0	0	519I252M718I	R277	Schwartzia_succinivorans_strain_S1-1_(NR_029325.1)						H	8319	252	98.8	+	0	0	519I252M718I	R277	Schwartzia_succinivorans_strain_S1-1_(NR_029325.1)
H	8319	252	100	+	0	0	519I252M718I	R278	Schwartzia_succinivorans_strain_S1-1_(NR_029325.1)						H	8319	252	98.8	+	0	0	519I252M718I	R278	Schwartzia_succinivorans_strain_S1-1_(NR_029325.1)
H	8319	252	100	+	0	0	519I252M718I	R279	Schwartzia_succinivorans_strain_S1-1_(NR_029325.1)						H	8319	252	98.8	+	0	0	519I252M718I	R279	Schwartzia_succinivorans_strain_S1-1_(NR_029325.1)
H	8319	252	100	+	0	0	519I252M718I	R281	Schwartzia_succinivorans_strain_S1-1_(NR_029325.1)						H	8319	252	98.8	+	0	0	519I252M718I	R280	Schwartzia_succinivorans_strain_S1-1_(NR_029325.1)
H	8319	252	100	+	0	0	519I252M718I	R280	Schwartzia_succinivorans_strain_S1-1_(NR_029325.1)						H	8319	252	98.8	+	0	0	519I252M718I	R281	Schwartzia_succinivorans_strain_S1-1_(NR_029325.1)
H	8319	252	100	+	0	0	519I252M718I	R282	Schwartzia_succinivorans_strain_S1-1_(NR_029325.1)						H	8319	252	98.8	+	0	0	519I252M718I	R282	Schwartzia_succinivorans_strain_S1-1_(NR_029325.1)
H	8319	252	100	+	0	0	519I252M718I	R285	Schwartzia_succinivorans_strain_S1-1_(NR_029325.1)						H	8319	252	98.8	+	0	0	519I252M718I	R283	Schwartzia_succinivorans_strain_S1-1_(NR_029325.1)
H	8319	252	100	+	0	0	519I252M718I	R284	Schwartzia_succinivorans_strain_S1-1_(NR_029325.1)						H	8319	252	98.8	+	0	0	519I252M718I	R284	Schwartzia_succinivorans_strain_S1-1_(NR_029325.1)
H	8319	252	100	+	0	0	519I252M718I	R286	Schwartzia_succinivorans_strain_S1-1_(NR_029325.1)						H	8319	252	98.8	+	0	0	519I252M718I	R286	Schwartzia_succinivorans_strain_S1-1_(NR_029325.1)
H	8319	252	100	+	0	0	519I252M718I	R283	Schwartzia_succinivorans_strain_S1-1_(NR_029325.1)						H	8319	252	98.8	+	0	0	519I252M718I	R285	Schwartzia_succinivorans_strain_S1-1_(NR_029325.1)
H	8319	252	100	+	0	0	519I252M718I	R287	Schwartzia_succinivorans_strain_S1-1_(NR_029325.1)						H	8319	252	98.8	+	0	0	519I252M718I	R287	Schwartzia_succinivorans_strain_S1-1_(NR_029325.1)
H	8319	252	100	+	0	0	519I252M718I	R288	Schwartzia_succinivorans_strain_S1-1_(NR_029325.1)						H	8319	252	98.8	+	0	0	519I252M718I	R288	Schwartzia_succinivorans_strain_S1-1_(NR_029325.1)
H	8319	252	100	+	0	0	519I252M718I	R289	Schwartzia_succinivorans_strain_S1-1_(NR_029325.1)						H	8319	252	98.8	+	0	0	519I252M718I	R289	Schwartzia_succinivorans_strain_S1-1_(NR_029325.1)
H	8319	252	100	+	0	0	519I252M718I	R290	Schwartzia_succinivorans_strain_S1-1_(NR_029325.1)						H	8319	252	98.8	+	0	0	519I252M718I	R290	Schwartzia_succinivorans_strain_S1-1_(NR_029325.1)
H	8319	252	100	+	0	0	519I252M718I	R291	Schwartzia_succinivorans_strain_S1-1_(NR_029325.1)						H	8319	252	98.8	+	0	0	519I252M718I	R291	Schwartzia_succinivorans_strain_S1-1_(NR_029325.1)
H	8319	252	100	+	0	0	519I252M718I	R292	Schwartzia_succinivorans_strain_S1-1_(NR_029325.1)						H	8319	252	98.8	+	0	0	519I252M718I	R293	Schwartzia_succinivorans_strain_S1-1_(NR_029325.1)
H	8319	252	100	+	0	0	519I252M718I	R294	Schwartzia_succinivorans_strain_S1-1_(NR_029325.1)						H	8319	252	98.8	+	0	0	519I252M718I	R292	Schwartzia_succinivorans_strain_S1-1_(NR_029325.1)
H	8319	252	100	+	0	0	519I252M718I	R293	Schwartzia_succinivorans_strain_S1-1_(NR_029325.1)						H	8319	252	98.8	+	0	0	519I252M718I	R294	Schwartzia_succinivorans_strain_S1-1_(NR_029325.1)
H	8319	252	100	+	0	0	519I252M718I	R295	Schwartzia_succinivorans_strain_S1-1_(NR_029325.1)						H	8319	252	98.8	+	0	0	519I252M718I	R295	Schwartzia_succinivorans_strain_S1-1_(NR_029325.1)
H	8319	252	100	+	0	0	519I252M718I	R296	Schwartzia_succinivorans_strain_S1-1_(NR_029325.1)						H	8319	252	98.8	+	0	0	519I252M718I	R296	Schwartzia_succinivorans_strain_S1-1_(NR_029325.1)
H	8319	252	100	+	0	0	519I252M718I	R297	Schwartzia_succinivorans_strain_S1-1_(NR_029325.1)						H	8319	252	98.8	+	0	0	519I252M718I	R297	Schwartzia_succinivorans_strain_S1-1_(NR_029325.1)
H	8319	252	100	+	0	0	519I252M718I	R298	Schwartzia_succinivorans_strain_S1-1_(NR_029325.1)						H	8319	252	98.8	+	0	0	519I252M718I	R298	Schwartzia_succinivorans_strain_S1-1_(NR_029325.1)
H	8319	252	100	+	0	0	519I252M718I	R299	Schwartzia_succinivorans_strain_S1-1_(NR_029325.1)						H	8319	252	98.8	+	0	0	519I252M718I	R299	Schwartzia_succinivorans_strain_S1-1_(NR_029325.1)
H	8319	252	100	+	0	0	519I252M718I	R301	Schwartzia_succinivorans_strain_S1-1_(NR_029325.1)						H	8319	252	98.8	+	0	0	519I252M718I	R300	Schwartzia_succinivorans_strain_S1-1_(NR_029325.1)
H	8319	252	100	+	0	0	519I252M718I	R302	Schwartzia_succinivorans_strain_S1-1_(NR_029325.1)						H	8319	252	98.8	+	0	0	519I252M718I	R301	Schwartzia_succinivorans_strain_S1-1_(NR_029325.1)
H	8319	252	100	+	0	0	519I252M718I	R303	Schwartzia_succinivorans_strain_S1-1_(NR_029325.1)						H	8319	252	98.8	+	0	0	519I252M718I	R302	Schwartzia_succinivorans_strain_S1-1_(NR_029325.1)
H	8319	252	100	+	0	0	519I252M718I	R305	Schwartzia_succinivorans_strain_S1-1_(NR_029325.1)						H	8319	252	98.8	+	0	0	519I252M718I	R303	Schwartzia_succinivorans_strain_S1-1_(NR_029325.1)
H	8319	252	100	+	0	0	519I252M718I	R304	Schwartzia_succinivorans_strain_S1-1_(NR_029325.1)						H	8319	252	98.8	+	0	0	519I252M718I	R304	Schwartzia_succinivorans_strain_S1-1_(NR_029325.1)
H	8319	252	100	+	0	0	519I252M718I	R306	Schwartzia_succinivorans_strain_S1-1_(NR_029325.1)						H	8319	252	98.8	+	0	0	519I252M718I	R305	Schwartzia_succinivorans_strain_S1-1_(NR_029325.1)
H	8319	252	100	+	0	0	519I252M718I	R307	Schwartzia_succinivorans_strain_S1-1_(NR_029325.1)						H	8319	252	98.8	+	0	0	519I252M718I	R307	Schwartzia_succinivorans_strain_S1-1_(NR_029325.1)
H	8319	252	100	+	0	0	519I252M718I	R300	Schwartzia_succinivorans_strain_S1-1_(NR_029325.1)						H	8319	252	98.8	+	0	0	519I252M718I	R309	Schwartzia_succinivorans_strain_S1-1_(NR_029325.1)
H	8319	252	100	+	0	0	519I252M718I	R308	Schwartzia_succinivorans_strain_S1-1_(NR_029325.1)						H	8319	252	98.8	+	0	0	519I252M718I	R308	Schwartzia_succinivorans_strain_S1-1_(NR_029325.1)
H	8319	252	100	+	0	0	519I252M718I	R309	Schwartzia_succinivorans_strain_S1-1_(NR_029325.1)						H	8319	252	98.8	+	0	0	519I252M718I	R306	Schwartzia_succinivorans_strain_S1-1_(NR_029325.1)
H	8319	252	100	+	0	0	519I252M718I	R311	Schwartzia_succinivorans_strain_S1-1_(NR_029325.1)						H	8319	252	98.8	+	0	0	519I252M718I	R310	Schwartzia_succinivorans_strain_S1-1_(NR_029325.1)
H	8319	252	100	+	0	0	519I252M718I	R314	Schwartzia_succinivorans_strain_S1-1_(NR_029325.1)						H	8319	252	98.8	+	0	0	519I252M718I	R311	Schwartzia_succinivorans_strain_S1-1_(NR_029325.1)
H	8319	252	100	+	0	0	519I252M718I	R310	Schwartzia_succinivorans_strain_S1-1_(NR_029325.1)						H	8319	252	98.8	+	0	0	519I252M718I	R312	Schwartzia_succinivorans_strain_S1-1_(NR_029325.1)
H	8319	252	100	+	0	0	519I252M718I	R312	Schwartzia_succinivorans_strain_S1-1_(NR_029325.1)						H	8319	252	98.8	+	0	0	519I252M718I	R313	Schwartzia_succinivorans_strain_S1-1_(NR_029325.1)
H	8319	252	100	+	0	0	519I252M718I	R313	Schwartzia_succinivorans_strain_S1-1_(NR_029325.1)						H	8319	252	98.8	+	0	0	519I252M718I	R314	Schwartzia_succinivorans_strain_S1-1_(NR_029325.1)
H	8319	252	100	+	0	0	519I252M718I	R315	Schwartzia_succinivorans_strain_S1-1_(NR_029325.1)						H	8319	252	98.8	+	0	0	519I252M718I	R315	Schwartzia_succinivorans_strain_S1-1_(NR_029325.1)
H	8319	252	100	+	0	0	519I252M718I	R316	Schwartzia_succinivorans_strain_S1-1_(NR_029325.1)						H	8319	252	98.8	+	0	0	519I252M718I	R316	Schwartzia_succinivorans_strain_S1-1_(NR_029325.1)
H	8319	252	100	+	0	0	519I252M718I	R317	Schwartzia_succinivorans_strain_S1-1_(NR_029325.1)						H	8319	252	98.8	+	0	0	519I252M718I	R317	Schwartzia_succinivorans_strain_S1-1_(NR_029325.1)
H	8319	252	100	+	0	0	519I252M718I	R318	Schwartzia_succinivorans_strain_S1-1_(NR_029325.1)						H	8319	252	98.8	+	0	0	519I252M718I	R318	Schwartzia_succinivorans_strain_S1-1_(NR_029325.1)
H	8319	252	100	+	0	0	519I252M718I	R319	Schwartzia_succinivorans_strain_S1-1_(NR_029325.1)						H	8319	252	98.8	+	0	0	519I252M718I	R319	Schwartzia_succinivorans_strain_S1-1_(NR_029325.1)
H	8319	252	100	+	0	0	519I252M718I	R320	Schwartzia_succinivorans_strain_S1-1_(NR_029325.1)						H	8319	252	98.8	+	0	0	519I252M718I	R320	Schwartzia_succinivorans_strain_S1-1_(NR_029325.1)
H	8319	252	100	+	0	0	519I252M718I	R322	Schwartzia_succinivorans_strain_S1-1_(NR_029325.1)						H	8319	252	98.8	+	0	0	519I252M718I	R321	Schwartzia_succinivorans_strain_S1-1_(NR_029325.1)
H	8319	252	100	+	0	0	519I252M718I	R323	Schwartzia_succinivorans_strain_S1-1_(NR_029325.1)						H	8319	252	98.8	+	0	0	519I252M718I	R322	Schwartzia_succinivorans_strain_S1-1_(NR_029325.1)
H	8319	252	100	+	0	0	519I252M718I	R324	Schwartzia_succinivorans_strain_S1-1_(NR_029325.1)						H	8319	252	98.8	+	0	0	519I252M718I	R323	Schwartzia_succinivorans_strain_S1-1_(NR_029325.1)
H	8319	252	100	+	0	0	519I252M718I	R325	Schwartzia_succinivorans_strain_S1-1_(NR_029325.1)						H	8319	252	98.8	+	0	0	519I252M718I	R324	Schwartzia_succinivorans_strain_S1-1_(NR_029325.1)
H	8319	252	100	+	0	0	519I252M718I	R326	Schwartzia_succinivorans_strain_S1-1_(NR_029325.1)						H	8319	252	98.8	+	0	0	519I252M718I	R325	Schwartzia_succinivorans_strain_S1-1_(NR_029325.1)
H	8319	252	100	+	0	0	519I252M718I	R321	Schwartzia_succinivorans_strain_S1-1_(NR_029325.1)						H	8319	252	98.8	+	0	0	519I252M718I	R326	Schwartzia_succinivorans_strain_S1-1_(NR_029325.1)
H	8319	252	100	+	0	0	519I252M718I	R327	Schwartzia_succinivorans_strain_S1-1_(NR_029325.1)						H	8319	252	98.8	+	0	0	519I252M718I	R327	Schwartzia_succinivorans_strain_S1-1_(NR_029325.1)
H	8319	252	100	+	0	0	519I252M718I	R328	Schwartzia_succinivorans_strain_S1-1_(NR_029325.1)						H	8319	252	98.8	+	0	0	519I252M718I	R328	Schwartzia_succinivorans_strain_S1-1_(NR_029325.1)
H	8319	252	100	+	0	0	519I252M718I	R329	Schwartzia_succinivorans_strain_S1-1_(NR_029325.1)						H	8319	252	98.8	+	0	0	519I252M718I	R329	Schwartzia_succinivorans_strain_S1-1_(NR_029325.1)
H	8319	252	100	+	0	0	519I252M718I	R330	Schwartzia_succinivorans_strain_S1-1_(NR_029325.1)						H	8319	252	98.8	+	0	0	519I252M718I	R332	Schwartzia_succinivorans_strain_S1-1_(NR_029325.1)
H	8319	252	100	+	0	0	519I252M718I	R331	Schwartzia_succinivorans_strain_S1-1_(NR_029325.1)						H	8319	252	98.8	+	0	0	519I252M718I	R331	Schwartzia_succinivorans_strain_S1-1_(NR_029325.1)
H	8319	252	100	+	0	0	519I252M718I	R332	Schwartzia_succinivorans_strain_S1-1_(NR_029325.1)						H	8319	252	98.8	+	0	0	519I252M718I	R330	Schwartzia_succinivorans_strain_S1-1_(NR_029325.1)
H	8319	252	100	+	0	0	519I252M718I	R333	Schwartzia_succinivorans_strain_S1-1_(NR_029325.1)						H	8319	252	98.8	+	0	0	519I252M718I	R333	Schwartzia_succinivorans_strain_S1-1_(NR_029325.1)
H	8319	252	100	+	0	0	519I252M718I	R334	Schwartzia_succinivorans_strain_S1-1_(NR_029325.1)						H	8319	252	98.8	+	0	0	519I252M718I	R334	Schwartzia_succinivorans_strain_S1-1_(NR_029325.1)
H	8319	252	100	+	0	0	519I252M718I	R335	Schwartzia_succinivorans_strain_S1-1_(NR_029325.1)						H	8319	252	98.8	+	0	0	519I252M718I	R335	Schwartzia_succinivorans_strain_S1-1_(NR_029325.1)
H	8319	252	100	+	0	0	519I252M718I	R336	Schwartzia_succinivorans_strain_S1-1_(NR_029325.1)						H	8319	252	98.8	+	0	0	519I252M718I	R336	Schwartzia_succinivorans_strain_S1-1_(NR_029325.1)
H	8319	252	100	+	0	0	519I252M718I	R337	Schwartzia_succinivorans_strain_S1-1_(NR_029325.1)						H	8319	252	98.8	+	0	0	519I252M718I	R337	Schwartzia_succinivorans_strain_S1-1_(NR_029325.1)
H	8319	252	100	+	0	0	519I252M718I	R338	Schwartzia_succinivorans_strain_S1-1_(NR_029325.1)						H	8319	252	98.8	+	0	0	519I252M718I	R338	Schwartzia_succinivorans_strain_S1-1_(NR_029325.1)
H	8319	252	100	+	0	0	519I252M718I	R339	Schwartzia_succinivorans_strain_S1-1_(NR_029325.1)						H	8319	252	98.8	+	0	0	519I252M718I	R340	Schwartzia_succinivorans_strain_S1-1_(NR_029325.1)
H	8319	252	100	+	0	0	519I252M718I	R340	Schwartzia_succinivorans_strain_S1-1_(NR_029325.1)						H	8319	252	98.8	+	0	0	519I252M718I	R339	Schwartzia_succinivorans_strain_S1-1_(NR_029325.1)
H	8319	252	100	+	0	0	519I252M718I	R341	Schwartzia_succinivorans_strain_S1-1_(NR_029325.1)						H	8319	252	98.8	+	0	0	519I252M718I	R341	Schwartzia_succinivorans_strain_S1-1_(NR_029325.1)
H	8319	252	100	+	0	0	519I252M718I	R342	Schwartzia_succinivorans_strain_S1-1_(NR_029325.1)						H	8319	252	98.8	+	0	0	519I252M718I	R342	Schwartzia_succinivorans_strain_S1-1_(NR_029325.1)
H	8319	252	100	+	0	0	519I252M718I	R343	Schwartzia_succinivorans_strain_S1-1_(NR_029325.1)						H	8319	252	98.8	+	0	0	519I252M718I	R343	Schwartzia_succinivorans_strain_S1-1_(NR_029325.1)
H	8319	252	100	+	0	0	519I252M718I	R344	Schwartzia_succinivorans_strain_S1-1_(NR_029325.1)						H	8319	252	98.8	+	0	0	519I252M718I	R344	Schwartzia_succinivorans_strain_S1-1_(NR_029325.1)
H	8319	252	100	+	0	0	519I252M718I	R345	Schwartzia_succinivorans_strain_S1-1_(NR_029325.1)						H	8319	252	98.8	+	0	0	519I252M718I	R345	Schwartzia_succinivorans_strain_S1-1_(NR_029325.1)
H	8319	252	100	+	0	0	519I252M718I	R346	Schwartzia_succinivorans_strain_S1-1_(NR_029325.1)						H	8319	252	98.8	+	0	0	519I252M718I	R346	Schwartzia_succinivorans_strain_S1-1_(NR_029325.1)
H	8319	252	100	+	0	0	519I252M718I	R347	Schwartzia_succinivorans_strain_S1-1_(NR_029325.1)						H	8319	252	98.8	+	0	0	519I252M718I	R347	Schwartzia_succinivorans_strain_S1-1_(NR_029325.1)
H	8319	252	100	+	0	0	519I252M718I	R350	Schwartzia_succinivorans_strain_S1-1_(NR_029325.1)						H	8319	252	98.8	+	0	0	519I252M718I	R348	Schwartzia_succinivorans_strain_S1-1_(NR_029325.1)
H	8319	252	100	+	0	0	519I252M718I	R348	Schwartzia_succinivorans_strain_S1-1_(NR_029325.1)						H	8319	252	98.8	+	0	0	519I252M718I	R349	Schwartzia_succinivorans_strain_S1-1_(NR_029325.1)
H	8319	252	100	+	0	0	519I252M718I	R351	Schwartzia_succinivorans_strain_S1-1_(NR_029325.1)						H	8319	252	98.8	+	0	0	519I252M718I	R350	Schwartzia_succinivorans_strain_S1-1_(NR_029325.1)
H	8319	252	100	+	0	0	519I252M718I	R352	Schwartzia_succinivorans_strain_S1-1_(NR_029325.1)						H	8319	252	98.8	+	0	0	519I252M718I	R351	Schwartzia_succinivorans_strain_S1-1_(NR_029325.1)
H	8319	252	100	+	0	0	519I252M718I	R353	Schwartzia_succinivorans_strain_S1-1_(NR_029325.1)						H	8319	252	98.8	+	0	0	519I252M718I	R352	Schwartzia_succinivorans_strain_S1-1_(NR_029325.1)
H	8319	252	100	+	0	0	519I252M718I	R355	Schwartzia_succinivorans_strain_S1-1_(NR_029325.1)						H	8319	252	98.8	+	0	0	519I252M718I	R353	Schwartzia_succinivorans_strain_S1-1_(NR_029325.1)
H	8319	252	100	+	0	0	519I252M718I	R356	Schwartzia_succinivorans_strain_S1-1_(NR_029325.1)						H	8319	252	98.8	+	0	0	519I252M718I	R355	Schwartzia_succinivorans_strain_S1-1_(NR_029325.1)
H	8319	252	100	+	0	0	519I252M718I	R354	Schwartzia_succinivorans_strain_S1-1_(NR_029325.1)						H	8319	252	98.8	+	0	0	519I252M718I	R356	Schwartzia_succinivorans_strain_S1-1_(NR_029325.1)
H	8319	252	100	+	0	0	519I252M718I	R357	Schwartzia_succinivorans_strain_S1-1_(NR_029325.1)						H	8319	252	98.8	+	0	0	519I252M718I	R354	Schwartzia_succinivorans_strain_S1-1_(NR_029325.1)
H	8319	252	100	+	0	0	519I252M718I	R349	Schwartzia_succinivorans_strain_S1-1_(NR_029325.1)						H	8319	252	98.8	+	0	0	519I252M718I	R358	Schwartzia_succinivorans_strain_S1-1_(NR_029325.1)
H	8319	252	100	+	0	0	519I252M718I	R358	Schwartzia_succinivorans_strain_S1-1_(NR_029325.1)						H	8319	252	98.8	+	0	0	519I252M718I	R357	Schwartzia_succinivorans_strain_S1-1_(NR_029325.1)
H	8319	252	100	+	0	0	519I252M718I	R361	Schwartzia_succinivorans_strain_S1-1_(NR_029325.1)						H	8319	252	98.8	+	0	0	519I252M718I	R359	Schwartzia_succinivorans_strain_S1-1_(NR_029325.1)
H	8319	252	100	+	0	0	519I252M718I	R362	Schwartzia_succinivorans_strain_S1-1_(NR_029325.1)						H	8319	252	98.8	+	0	0	519I252M718I	R360	Schwartzia_succinivorans_strain_S1-1_(NR_029325.1)
H	8319	252	100	+	0	0	519I252M718I	R359	Schwartzia_succinivorans_strain_S1-1_(NR_029325.1)						H	8319	252	98.8	+	0	0	519I252M718I	R361	Schwartzia_succinivorans_strain_S1-1_(NR_029325.1)
H	8319	252	100	+	0	0	519I252M718I	R363	Schwartzia_succinivorans_strain_S1-1_(NR_029325.1)						H	8319	252	98.8	+	0	0	519I252M718I	R362	Schwartzia_succinivorans_strain_S1-1_(NR_029325.1)
H	8319	252	100	+	0	0	519I252M718I	R364	Schwartzia_succinivorans_strain_S1-1_(NR_029325.1)						H	8319	252	98.8	+	0	0	519I252M718I	R363	Schwartzia_succinivorans_strain_S1-1_(NR_029325.1)
H	8319	252	100	+	0	0	519I252M718I	R365	Schwartzia_succinivorans_strain_S1-1_(NR_029325.1)						H	8319	252	98.8	+	0	0	519I252M718I	R364	Schwartzia_succinivorans_strain_S1-1_(NR_029325.1)
H	8319	252	100	+	0	0	519I252M718I	R366	Schwartzia_succinivorans_strain_S1-1_(NR_029325.1)						H	8319	252	98.8	+	0	0	519I252M718I	R365	Schwartzia_succinivorans_strain_S1-1_(NR_029325.1)
H	8319	252	100	+	0	0	519I252M718I	R367	Schwartzia_succinivorans_strain_S1-1_(NR_029325.1)						H	8319	252	98.8	+	0	0	519I252M718I	R366	Schwartzia_succinivorans_strain_S1-1_(NR_029325.1)
H	8319	252	100	+	0	0	519I252M718I	R368	Schwartzia_succinivorans_strain_S1-1_(NR_029325.1)						H	8319	252	98.8	+	0	0	519I252M718I	R367	Schwartzia_succinivorans_strain_S1-1_(NR_029325.1)
H	8319	252	100	+	0	0	519I252M718I	R369	Schwartzia_succinivorans_strain_S1-1_(NR_029325.1)						H	8319	252	98.8	+	0	0	519I252M718I	R368	Schwartzia_succinivorans_strain_S1-1_(NR_029325.1)
H	8319	252	100	+	0	0	519I252M718I	R370	Schwartzia_succinivorans_strain_S1-1_(NR_029325.1)						H	8319	252	98.8	+	0	0	519I252M718I	R369	Schwartzia_succinivorans_strain_S1-1_(NR_029325.1)
H	8319	252	100	+	0	0	519I252M718I	R371	Schwartzia_succinivorans_strain_S1-1_(NR_029325.1)						H	8319	252	98.8	+	0	0	519I252M718I	R370	Schwartzia_succinivorans_strain_S1-1_(NR_029325.1)
H	8319	252	100	+	0	0	519I252M718I	R372	Schwartzia_succinivorans_strain_S1-1_(NR_029325.1)						H	8319	252	98.8	+	0	0	519I252M718I	R371	Schwartzia_succinivorans_strain_S1-1_(NR_029325.1)
H	8319	252	100	+	0	0	519I252M718I	R373	Schwartzia_succinivorans_strain_S1-1_(NR_029325.1)						H	8319	252	98.8	+	0	0	519I252M718I	R372	Schwartzia_succinivorans_strain_S1-1_(NR_029325.1)
H	8319	252	100	+	0	0	519I252M718I	R374	Schwartzia_succinivorans_strain_S1-1_(NR_029325.1)						H	8319	252	98.8	+	0	0	519I252M718I	R373	Schwartzia_succinivorans_strain_S1-1_(NR_029325.1)
H	8319	252	100	+	0	0	519I252M718I	R376	Schwartzia_succinivorans_strain_S1-1_(NR_029325.1)						H	8319	252	98.8	+	0	0	519I252M718I	R374	Schwartzia_succinivorans_strain_S1-1_(NR_029325.1)
H	8319	252	100	+	0	0	519I252M718I	R377	Schwartzia_succinivorans_strain_S1-1_(NR_029325.1)						H	8319	252	98.8	+	0	0	519I252M718I	R375	Schwartzia_succinivorans_strain_S1-1_(NR_029325.1)
H	8319	252	100	+	0	0	519I252M718I	R378	Schwartzia_succinivorans_strain_S1-1_(NR_029325.1)						H	8319	252	98.8	+	0	0	519I252M718I	R376	Schwartzia_succinivorans_strain_S1-1_(NR_029325.1)
H	8319	252	100	+	0	0	519I252M718I	R379	Schwartzia_succinivorans_strain_S1-1_(NR_029325.1)						H	8319	252	98.8	+	0	0	519I252M718I	R377	Schwartzia_succinivorans_strain_S1-1_(NR_029325.1)
H	8319	252	100	+	0	0	519I252M718I	R380	Schwartzia_succinivorans_strain_S1-1_(NR_029325.1)						H	8319	252	98.8	+	0	0	519I252M718I	R379	Schwartzia_succinivorans_strain_S1-1_(NR_029325.1)
H	8319	252	100	+	0	0	519I252M718I	R375	Schwartzia_succinivorans_strain_S1-1_(NR_029325.1)						H	8319	252	98.8	+	0	0	519I252M718I	R380	Schwartzia_succinivorans_strain_S1-1_(NR_029325.1)
H	8319	252	100	+	0	0	519I252M718I	R381	Schwartzia_succinivorans_strain_S1-1_(NR_029325.1)						H	8319	252	98.8	+	0	0	519I252M718I	R378	Schwartzia_succinivorans_strain_S1-1_(NR_029325.1)
H	8319	252	100	+	0	0	519I252M718I	R382	Schwartzia_succinivorans_strain_S1-1_(NR_029325.1)						H	8319	252	98.8	+	0	0	519I252M718I	R381	Schwartzia_succinivorans_strain_S1-1_(NR_029325.1)
H	8319	252	100	+	0	0	519I252M718I	R360	Schwartzia_succinivorans_strain_S1-1_(NR_029325.1)						H	8319	252	98.8	+	0	0	519I252M718I	R382	Schwartzia_succinivorans_strain_S1-1_(NR_029325.1)
H	8319	252	100	+	0	0	519I252M718I	R384	Schwartzia_succinivorans_strain_S1-1_(NR_029325.1)						H	8319	252	98.8	+	0	0	519I252M718I	R383	Schwartzia_succinivorans_strain_S1-1_(NR_029325.1)
H	8319	252	100	+	0	0	519I252M718I	R385	Schwartzia_succinivorans_strain_S1-1_(NR_029325.1)						H	8319	252	98.8	+	0	0	519I252M718I	R384	Schwartzia_succinivorans_strain_S1-1_(NR_029325.1)
H	8319	252	100	+	0	0	519I252M718I	R386	Schwartzia_succinivorans_strain_S1-1_(NR_029325.1)						H	8319	252	98.8	+	0	0	519I252M718I	R385	Schwartzia_succinivorans_strain_S1-1_(NR_029325.1)
H	8319	252	100	+	0	0	519I252M718I	R387	Schwartzia_succinivorans_strain_S1-1_(NR_029325.1)						H	8319	252	98.8	+	0	0	519I252M718I	R386	Schwartzia_succinivorans_strain_S1-1_(NR_029325.1)
H	8319	252	100	+	0	0	519I252M718I	R389	Schwartzia_succinivorans_strain_S1-1_(NR_029325.1)						H	8319	252	98.8	+	0	0	519I252M718I	R387	Schwartzia_succinivorans_strain_S1-1_(NR_029325.1)
H	8319	252	100	+	0	0	519I252M718I	R390	Schwartzia_succinivorans_strain_S1-1_(NR_029325.1)						H	8319	252	98.8	+	0	0	519I252M718I	R388	Schwartzia_succinivorans_strain_S1-1_(NR_029325.1)
H	8319	252	100	+	0	0	519I252M718I	R391	Schwartzia_succinivorans_strain_S1-1_(NR_029325.1)						H	8319	252	98.8	+	0	0	519I252M718I	R389	Schwartzia_succinivorans_strain_S1-1_(NR_029325.1)
H	8319	252	100	+	0	0	519I252M718I	R388	Schwartzia_succinivorans_strain_S1-1_(NR_029325.1)						H	8319	252	98.8	+	0	0	519I252M718I	R391	Schwartzia_succinivorans_strain_S1-1_(NR_029325.1)
H	8319	252	100	+	0	0	519I252M718I	R393	Schwartzia_succinivorans_strain_S1-1_(NR_029325.1)						H	8319	252	98.8	+	0	0	519I252M718I	R392	Schwartzia_succinivorans_strain_S1-1_(NR_029325.1)
H	8319	252	100	+	0	0	519I252M718I	R395	Schwartzia_succinivorans_strain_S1-1_(NR_029325.1)						H	8319	252	98.8	+	0	0	519I252M718I	R390	Schwartzia_succinivorans_strain_S1-1_(NR_029325.1)
H	8319	252	100	+	0	0	519I252M718I	R392	Schwartzia_succinivorans_strain_S1-1_(NR_029325.1)						H	8319	252	98.8	+	0	0	519I252M718I	R393	Schwartzia_succinivorans_strain_S1-1_(NR_029325.1)
H	8319	252	100	+	0	0	519I252M718I	R396	Schwartzia_succinivorans_strain_S1-1_(NR_029325.1)						H	8319	252	98.8	+	0	0	519I252M718I	R394	Schwartzia_succinivorans_strain_S1-1_(NR_029325.1)
H	8319	252	100	+	0	0	519I252M718I	R394	Schwartzia_succinivorans_strain_S1-1_(NR_029325.1)						H	8319	252	98.8	+	0	0	519I252M718I	R395	Schwartzia_succinivorans_strain_S1-1_(NR_029325.1)
H	8319	252	100	+	0	0	519I252M718I	R397	Schwartzia_succinivorans_strain_S1-1_(NR_029325.1)						H	4855	253	98.4	+	0	0	542I253M755I	R396	Exiguobacterium_acetylicum_strain_DSM_20416_(NR_043479.1)
H	8319	252	100	+	0	0	519I252M718I	R398	Schwartzia_succinivorans_strain_S1-1_(NR_029325.1)						H	8319	252	99.6	+	0	0	519I252M718I	R397	Schwartzia_succinivorans_strain_S1-1_(NR_029325.1)
H	8319	252	100	+	0	0	519I252M718I	R399	Schwartzia_succinivorans_strain_S1-1_(NR_029325.1)						H	8319	252	99.6	+	0	0	519I252M718I	R398	Schwartzia_succinivorans_strain_S1-1_(NR_029325.1)
H	8319	252	100	+	0	0	519I252M718I	R400	Schwartzia_succinivorans_strain_S1-1_(NR_029325.1)						H	8319	252	99.6	+	0	0	519I252M718I	R399	Schwartzia_succinivorans_strain_S1-1_(NR_029325.1)
H	8319	252	100	+	0	0	519I252M718I	R401	Schwartzia_succinivorans_strain_S1-1_(NR_029325.1)						H	8319	252	99.6	+	0	0	519I252M718I	R400	Schwartzia_succinivorans_strain_S1-1_(NR_029325.1)
H	8319	252	100	+	0	0	519I252M718I	R402	Schwartzia_succinivorans_strain_S1-1_(NR_029325.1)						H	8319	252	99.6	+	0	0	519I252M718I	R401	Schwartzia_succinivorans_strain_S1-1_(NR_029325.1)
H	8319	252	100	+	0	0	519I252M718I	R403	Schwartzia_succinivorans_strain_S1-1_(NR_029325.1)						H	8319	252	99.6	+	0	0	519I252M718I	R403	Schwartzia_succinivorans_strain_S1-1_(NR_029325.1)
H	8319	252	100	+	0	0	519I252M718I	R405	Schwartzia_succinivorans_strain_S1-1_(NR_029325.1)						H	8319	252	99.6	+	0	0	519I252M718I	R404	Schwartzia_succinivorans_strain_S1-1_(NR_029325.1)
H	8319	252	100	+	0	0	519I252M718I	R404	Schwartzia_succinivorans_strain_S1-1_(NR_029325.1)						H	8319	252	99.6	+	0	0	519I252M718I	R402	Schwartzia_succinivorans_strain_S1-1_(NR_029325.1)
H	8319	252	100	+	0	0	519I252M718I	R406	Schwartzia_succinivorans_strain_S1-1_(NR_029325.1)						H	7288	253	100	+	0	0	474I253M688I	R405	Lysobacter_oryzae_strain_YC6269_(NR_044484.1)
H	8319	252	100	+	0	0	519I252M718I	R407	Schwartzia_succinivorans_strain_S1-1_(NR_029325.1)						H	7288	253	100	+	0	0	474I253M688I	R406	Lysobacter_oryzae_strain_YC6269_(NR_044484.1)
H	8319	252	100	+	0	0	519I252M718I	R409	Schwartzia_succinivorans_strain_S1-1_(NR_029325.1)						H	7288	253	100	+	0	0	474I253M688I	R407	Lysobacter_oryzae_strain_YC6269_(NR_044484.1)
H	8319	252	100	+	0	0	519I252M718I	R410	Schwartzia_succinivorans_strain_S1-1_(NR_029325.1)						H	7288	253	100	+	0	0	474I253M688I	R408	Lysobacter_oryzae_strain_YC6269_(NR_044484.1)
H	8319	252	100	+	0	0	519I252M718I	R408	Schwartzia_succinivorans_strain_S1-1_(NR_029325.1)						H	7288	253	100	+	0	0	474I253M688I	R409	Lysobacter_oryzae_strain_YC6269_(NR_044484.1)
H	8319	252	100	+	0	0	519I252M718I	R411	Schwartzia_succinivorans_strain_S1-1_(NR_029325.1)						H	7288	253	100	+	0	0	474I253M688I	R410	Lysobacter_oryzae_strain_YC6269_(NR_044484.1)
H	8319	252	100	+	0	0	519I252M718I	R413	Schwartzia_succinivorans_strain_S1-1_(NR_029325.1)						H	7288	253	100	+	0	0	474I253M688I	R411	Lysobacter_oryzae_strain_YC6269_(NR_044484.1)
H	8319	252	100	+	0	0	519I252M718I	R414	Schwartzia_succinivorans_strain_S1-1_(NR_029325.1)						H	7288	253	100	+	0	0	474I253M688I	R412	Lysobacter_oryzae_strain_YC6269_(NR_044484.1)
H	8319	252	100	+	0	0	519I252M718I	R412	Schwartzia_succinivorans_strain_S1-1_(NR_029325.1)						H	7288	253	100	+	0	0	474I253M688I	R413	Lysobacter_oryzae_strain_YC6269_(NR_044484.1)
H	8319	252	100	+	0	0	519I252M718I	R416	Schwartzia_succinivorans_strain_S1-1_(NR_029325.1)						H	7288	253	100	+	0	0	474I253M688I	R414	Lysobacter_oryzae_strain_YC6269_(NR_044484.1)
H	8319	252	100	+	0	0	519I252M718I	R418	Schwartzia_succinivorans_strain_S1-1_(NR_029325.1)						H	7288	253	100	+	0	0	474I253M688I	R415	Lysobacter_oryzae_strain_YC6269_(NR_044484.1)
H	8319	252	100	+	0	0	519I252M718I	R417	Schwartzia_succinivorans_strain_S1-1_(NR_029325.1)						H	7288	253	100	+	0	0	474I253M688I	R416	Lysobacter_oryzae_strain_YC6269_(NR_044484.1)
H	8319	252	100	+	0	0	519I252M718I	R419	Schwartzia_succinivorans_strain_S1-1_(NR_029325.1)						H	7288	253	100	+	0	0	474I253M688I	R417	Lysobacter_oryzae_strain_YC6269_(NR_044484.1)
H	8319	252	100	+	0	0	519I252M718I	R420	Schwartzia_succinivorans_strain_S1-1_(NR_029325.1)						H	7288	253	100	+	0	0	474I253M688I	R418	Lysobacter_oryzae_strain_YC6269_(NR_044484.1)
H	8319	252	100	+	0	0	519I252M718I	R421	Schwartzia_succinivorans_strain_S1-1_(NR_029325.1)						H	7288	253	100	+	0	0	474I253M688I	R419	Lysobacter_oryzae_strain_YC6269_(NR_044484.1)
H	8319	252	100	+	0	0	519I252M718I	R422	Schwartzia_succinivorans_strain_S1-1_(NR_029325.1)						H	7288	253	100	+	0	0	474I253M688I	R420	Lysobacter_oryzae_strain_YC6269_(NR_044484.1)
H	8319	252	100	+	0	0	519I252M718I	R424	Schwartzia_succinivorans_strain_S1-1_(NR_029325.1)						H	7288	253	100	+	0	0	474I253M688I	R421	Lysobacter_oryzae_strain_YC6269_(NR_044484.1)
H	8319	252	100	+	0	0	519I252M718I	R415	Schwartzia_succinivorans_strain_S1-1_(NR_029325.1)						H	7288	253	100	+	0	0	474I253M688I	R422	Lysobacter_oryzae_strain_YC6269_(NR_044484.1)
H	8319	252	100	+	0	0	519I252M718I	R426	Schwartzia_succinivorans_strain_S1-1_(NR_029325.1)						H	7288	253	100	+	0	0	474I253M688I	R423	Lysobacter_oryzae_strain_YC6269_(NR_044484.1)
H	8319	252	100	+	0	0	519I252M718I	R425	Schwartzia_succinivorans_strain_S1-1_(NR_029325.1)						H	7288	253	100	+	0	0	474I253M688I	R425	Lysobacter_oryzae_strain_YC6269_(NR_044484.1)
H	8319	252	100	+	0	0	519I252M718I	R423	Schwartzia_succinivorans_strain_S1-1_(NR_029325.1)						H	7288	253	100	+	0	0	474I253M688I	R424	Lysobacter_oryzae_strain_YC6269_(NR_044484.1)
H	8319	252	100	+	0	0	519I252M718I	R427	Schwartzia_succinivorans_strain_S1-1_(NR_029325.1)						H	13694	253	100	+	0	0	518I253M756I	R426	Pseudomonas_aeruginosa_strain_DSM_50071_(NR_117678.1)
H	8319	252	100	+	0	0	519I252M718I	R428	Schwartzia_succinivorans_strain_S1-1_(NR_029325.1)						H	13694	253	100	+	0	0	518I253M756I	R427	Pseudomonas_aeruginosa_strain_DSM_50071_(NR_117678.1)
H	8319	252	100	+	0	0	519I252M718I	R429	Schwartzia_succinivorans_strain_S1-1_(NR_029325.1)						H	13694	253	100	+	0	0	518I253M756I	R428	Pseudomonas_aeruginosa_strain_DSM_50071_(NR_117678.1)
H	8319	252	100	+	0	0	519I252M718I	R430	Schwartzia_succinivorans_strain_S1-1_(NR_029325.1)						H	13694	253	100	+	0	0	518I253M756I	R429	Pseudomonas_aeruginosa_strain_DSM_50071_(NR_117678.1)
H	8319	252	100	+	0	0	519I252M718I	R431	Schwartzia_succinivorans_strain_S1-1_(NR_029325.1)						H	13694	253	100	+	0	0	518I253M756I	R431	Pseudomonas_aeruginosa_strain_DSM_50071_(NR_117678.1)
H	8319	252	100	+	0	0	519I252M718I	R432	Schwartzia_succinivorans_strain_S1-1_(NR_029325.1)						H	13694	253	100	+	0	0	518I253M756I	R432	Pseudomonas_aeruginosa_strain_DSM_50071_(NR_117678.1)
H	8319	252	100	+	0	0	519I252M718I	R433	Schwartzia_succinivorans_strain_S1-1_(NR_029325.1)						H	13694	253	100	+	0	0	518I253M756I	R433	Pseudomonas_aeruginosa_strain_DSM_50071_(NR_117678.1)
H	8319	252	100	+	0	0	519I252M718I	R434	Schwartzia_succinivorans_strain_S1-1_(NR_029325.1)						H	13694	253	100	+	0	0	518I253M756I	R430	Pseudomonas_aeruginosa_strain_DSM_50071_(NR_117678.1)
H	8319	252	100	+	0	0	519I252M718I	R435	Schwartzia_succinivorans_strain_S1-1_(NR_029325.1)						H	13694	253	100	+	0	0	518I253M756I	R434	Pseudomonas_aeruginosa_strain_DSM_50071_(NR_117678.1)
H	8319	252	100	+	0	0	519I252M718I	R436	Schwartzia_succinivorans_strain_S1-1_(NR_029325.1)						H	13694	253	100	+	0	0	518I253M756I	R435	Pseudomonas_aeruginosa_strain_DSM_50071_(NR_117678.1)
H	8319	252	100	+	0	0	519I252M718I	R437	Schwartzia_succinivorans_strain_S1-1_(NR_029325.1)						H	13694	253	100	+	0	0	518I253M756I	R436	Pseudomonas_aeruginosa_strain_DSM_50071_(NR_117678.1)
H	8319	252	100	+	0	0	519I252M718I	R438	Schwartzia_succinivorans_strain_S1-1_(NR_029325.1)						H	13694	253	100	+	0	0	518I253M756I	R437	Pseudomonas_aeruginosa_strain_DSM_50071_(NR_117678.1)
H	8319	252	100	+	0	0	519I252M718I	R439	Schwartzia_succinivorans_strain_S1-1_(NR_029325.1)						H	13694	253	100	+	0	0	518I253M756I	R438	Pseudomonas_aeruginosa_strain_DSM_50071_(NR_117678.1)
H	8319	252	100	+	0	0	519I252M718I	R440	Schwartzia_succinivorans_strain_S1-1_(NR_029325.1)						H	13694	253	100	+	0	0	518I253M756I	R439	Pseudomonas_aeruginosa_strain_DSM_50071_(NR_117678.1)
H	8319	252	100	+	0	0	519I252M718I	R442	Schwartzia_succinivorans_strain_S1-1_(NR_029325.1)						H	13694	253	100	+	0	0	518I253M756I	R440	Pseudomonas_aeruginosa_strain_DSM_50071_(NR_117678.1)
H	8319	252	100	+	0	0	519I252M718I	R443	Schwartzia_succinivorans_strain_S1-1_(NR_029325.1)						H	13694	253	100	+	0	0	518I253M756I	R441	Pseudomonas_aeruginosa_strain_DSM_50071_(NR_117678.1)
H	8319	252	100	+	0	0	519I252M718I	R444	Schwartzia_succinivorans_strain_S1-1_(NR_029325.1)						H	13694	253	100	+	0	0	518I253M756I	R442	Pseudomonas_aeruginosa_strain_DSM_50071_(NR_117678.1)
H	8319	252	100	+	0	0	519I252M718I	R441	Schwartzia_succinivorans_strain_S1-1_(NR_029325.1)						H	13694	253	100	+	0	0	518I253M756I	R443	Pseudomonas_aeruginosa_strain_DSM_50071_(NR_117678.1)
H	8319	252	100	+	0	0	519I252M718I	R445	Schwartzia_succinivorans_strain_S1-1_(NR_029325.1)						H	13694	253	100	+	0	0	518I253M756I	R444	Pseudomonas_aeruginosa_strain_DSM_50071_(NR_117678.1)
H	8319	252	100	+	0	0	519I252M718I	R446	Schwartzia_succinivorans_strain_S1-1_(NR_029325.1)						H	13694	253	100	+	0	0	518I253M756I	R445	Pseudomonas_aeruginosa_strain_DSM_50071_(NR_117678.1)
H	8319	252	100	+	0	0	519I252M718I	R447	Schwartzia_succinivorans_strain_S1-1_(NR_029325.1)						H	13694	253	100	+	0	0	518I253M756I	R448	Pseudomonas_aeruginosa_strain_DSM_50071_(NR_117678.1)
H	8319	252	100	+	0	0	519I252M718I	R448	Schwartzia_succinivorans_strain_S1-1_(NR_029325.1)						H	13694	253	100	+	0	0	518I253M756I	R447	Pseudomonas_aeruginosa_strain_DSM_50071_(NR_117678.1)
H	8319	252	100	+	0	0	519I252M718I	R450	Schwartzia_succinivorans_strain_S1-1_(NR_029325.1)						H	13694	253	100	+	0	0	518I253M756I	R446	Pseudomonas_aeruginosa_strain_DSM_50071_(NR_117678.1)
H	8319	252	100	+	0	0	519I252M718I	R449	Schwartzia_succinivorans_strain_S1-1_(NR_029325.1)						H	13694	253	100	+	0	0	518I253M756I	R449	Pseudomonas_aeruginosa_strain_DSM_50071_(NR_117678.1)
H	8319	252	100	+	0	0	519I252M718I	R451	Schwartzia_succinivorans_strain_S1-1_(NR_029325.1)						H	13694	253	100	+	0	0	518I253M756I	R450	Pseudomonas_aeruginosa_strain_DSM_50071_(NR_117678.1)
H	8319	252	100	+	0	0	519I252M718I	R452	Schwartzia_succinivorans_strain_S1-1_(NR_029325.1)						H	13694	253	100	+	0	0	518I253M756I	R451	Pseudomonas_aeruginosa_strain_DSM_50071_(NR_117678.1)
H	8319	252	100	+	0	0	519I252M718I	R453	Schwartzia_succinivorans_strain_S1-1_(NR_029325.1)						H	13694	253	100	+	0	0	518I253M756I	R452	Pseudomonas_aeruginosa_strain_DSM_50071_(NR_117678.1)
H	8319	252	100	+	0	0	519I252M718I	R454	Schwartzia_succinivorans_strain_S1-1_(NR_029325.1)						H	13694	253	100	+	0	0	518I253M756I	R453	Pseudomonas_aeruginosa_strain_DSM_50071_(NR_117678.1)
H	8319	252	100	+	0	0	519I252M718I	R455	Schwartzia_succinivorans_strain_S1-1_(NR_029325.1)						H	13694	253	100	+	0	0	518I253M756I	R454	Pseudomonas_aeruginosa_strain_DSM_50071_(NR_117678.1)
H	8319	252	100	+	0	0	519I252M718I	R456	Schwartzia_succinivorans_strain_S1-1_(NR_029325.1)						H	13694	253	100	+	0	0	518I253M756I	R455	Pseudomonas_aeruginosa_strain_DSM_50071_(NR_117678.1)
H	8319	252	100	+	0	0	519I252M718I	R457	Schwartzia_succinivorans_strain_S1-1_(NR_029325.1)						H	13694	253	100	+	0	0	518I253M756I	R456	Pseudomonas_aeruginosa_strain_DSM_50071_(NR_117678.1)
H	8319	252	100	+	0	0	519I252M718I	R458	Schwartzia_succinivorans_strain_S1-1_(NR_029325.1)						H	13694	253	100	+	0	0	518I253M756I	R457	Pseudomonas_aeruginosa_strain_DSM_50071_(NR_117678.1)
H	8319	252	100	+	0	0	519I252M718I	R459	Schwartzia_succinivorans_strain_S1-1_(NR_029325.1)						H	13694	253	100	+	0	0	518I253M756I	R458	Pseudomonas_aeruginosa_strain_DSM_50071_(NR_117678.1)
H	8319	252	100	+	0	0	519I252M718I	R461	Schwartzia_succinivorans_strain_S1-1_(NR_029325.1)						H	13694	253	100	+	0	0	518I253M756I	R459	Pseudomonas_aeruginosa_strain_DSM_50071_(NR_117678.1)
H	8319	252	100	+	0	0	519I252M718I	R462	Schwartzia_succinivorans_strain_S1-1_(NR_029325.1)						H	13694	253	100	+	0	0	518I253M756I	R460	Pseudomonas_aeruginosa_strain_DSM_50071_(NR_117678.1)
H	8319	252	100	+	0	0	519I252M718I	R460	Schwartzia_succinivorans_strain_S1-1_(NR_029325.1)						H	13694	253	100	+	0	0	518I253M756I	R461	Pseudomonas_aeruginosa_strain_DSM_50071_(NR_117678.1)
H	8319	252	100	+	0	0	519I252M718I	R463	Schwartzia_succinivorans_strain_S1-1_(NR_029325.1)						H	13694	253	100	+	0	0	518I253M756I	R462	Pseudomonas_aeruginosa_strain_DSM_50071_(NR_117678.1)
H	8319	252	100	+	0	0	519I252M718I	R465	Schwartzia_succinivorans_strain_S1-1_(NR_029325.1)						H	13694	253	100	+	0	0	518I253M756I	R463	Pseudomonas_aeruginosa_strain_DSM_50071_(NR_117678.1)
H	8319	252	100	+	0	0	519I252M718I	R464	Schwartzia_succinivorans_strain_S1-1_(NR_029325.1)						H	13694	253	100	+	0	0	518I253M756I	R464	Pseudomonas_aeruginosa_strain_DSM_50071_(NR_117678.1)
H	8319	252	100	+	0	0	519I252M718I	R467	Schwartzia_succinivorans_strain_S1-1_(NR_029325.1)						H	13694	253	100	+	0	0	518I253M756I	R465	Pseudomonas_aeruginosa_strain_DSM_50071_(NR_117678.1)
H	8319	252	100	+	0	0	519I252M718I	R468	Schwartzia_succinivorans_strain_S1-1_(NR_029325.1)						H	13694	253	100	+	0	0	518I253M756I	R466	Pseudomonas_aeruginosa_strain_DSM_50071_(NR_117678.1)
H	8319	252	100	+	0	0	519I252M718I	R466	Schwartzia_succinivorans_strain_S1-1_(NR_029325.1)						H	13694	253	100	+	0	0	518I253M756I	R467	Pseudomonas_aeruginosa_strain_DSM_50071_(NR_117678.1)
H	8319	252	100	+	0	0	519I252M718I	R469	Schwartzia_succinivorans_strain_S1-1_(NR_029325.1)						H	13694	253	100	+	0	0	518I253M756I	R469	Pseudomonas_aeruginosa_strain_DSM_50071_(NR_117678.1)
H	8319	252	100	+	0	0	519I252M718I	R470	Schwartzia_succinivorans_strain_S1-1_(NR_029325.1)						H	13694	253	100	+	0	0	518I253M756I	R468	Pseudomonas_aeruginosa_strain_DSM_50071_(NR_117678.1)
H	8319	252	100	+	0	0	519I252M718I	R471	Schwartzia_succinivorans_strain_S1-1_(NR_029325.1)						H	13694	253	100	+	0	0	518I253M756I	R471	Pseudomonas_aeruginosa_strain_DSM_50071_(NR_117678.1)
H	8319	252	100	+	0	0	519I252M718I	R472	Schwartzia_succinivorans_strain_S1-1_(NR_029325.1)						H	13694	253	100	+	0	0	518I253M756I	R470	Pseudomonas_aeruginosa_strain_DSM_50071_(NR_117678.1)
H	2359	253	96.4	+	0	0	528I253M750I	R474	Hydrotalea_sandarakina_strain_AF-51_(NR_109380.1)						H	13694	253	100	+	0	0	518I253M756I	R472	Pseudomonas_aeruginosa_strain_DSM_50071_(NR_117678.1)
H	8319	252	100	+	0	0	519I252M718I	R473	Schwartzia_succinivorans_strain_S1-1_(NR_029325.1)						H	13694	253	100	+	0	0	518I253M756I	R473	Pseudomonas_aeruginosa_strain_DSM_50071_(NR_117678.1)
H	2359	253	96.4	+	0	0	528I253M750I	R475	Hydrotalea_sandarakina_strain_AF-51_(NR_109380.1)						H	13694	253	100	+	0	0	518I253M756I	R475	Pseudomonas_aeruginosa_strain_DSM_50071_(NR_117678.1)
H	4855	253	99.2	+	0	0	542I253M755I	R476	Exiguobacterium_acetylicum_strain_DSM_20416_(NR_043479.1)						H	13694	253	100	+	0	0	518I253M756I	R474	Pseudomonas_aeruginosa_strain_DSM_50071_(NR_117678.1)
H	6235	253	100	+	0	0	526I253M758I	R477	Xylella_fastidiosa_strain_PCE-FF_(NR_041779.1)						H	13694	253	100	+	0	0	518I253M756I	R476	Pseudomonas_aeruginosa_strain_DSM_50071_(NR_117678.1)
H	6235	253	100	+	0	0	526I253M758I	R478	Xylella_fastidiosa_strain_PCE-FF_(NR_041779.1)						H	13694	253	100	+	0	0	518I253M756I	R477	Pseudomonas_aeruginosa_strain_DSM_50071_(NR_117678.1)
H	6235	253	100	+	0	0	526I253M758I	R480	Xylella_fastidiosa_strain_PCE-FF_(NR_041779.1)						H	13694	253	100	+	0	0	518I253M756I	R478	Pseudomonas_aeruginosa_strain_DSM_50071_(NR_117678.1)
H	6235	253	100	+	0	0	526I253M758I	R479	Xylella_fastidiosa_strain_PCE-FF_(NR_041779.1)						H	13694	253	100	+	0	0	518I253M756I	R479	Pseudomonas_aeruginosa_strain_DSM_50071_(NR_117678.1)
H	6235	253	100	+	0	0	526I253M758I	R481	Xylella_fastidiosa_strain_PCE-FF_(NR_041779.1)						H	13694	253	100	+	0	0	518I253M756I	R480	Pseudomonas_aeruginosa_strain_DSM_50071_(NR_117678.1)
H	6235	253	100	+	0	0	526I253M758I	R482	Xylella_fastidiosa_strain_PCE-FF_(NR_041779.1)						H	13694	253	100	+	0	0	518I253M756I	R481	Pseudomonas_aeruginosa_strain_DSM_50071_(NR_117678.1)
H	6235	253	100	+	0	0	526I253M758I	R483	Xylella_fastidiosa_strain_PCE-FF_(NR_041779.1)						H	13694	253	100	+	0	0	518I253M756I	R482	Pseudomonas_aeruginosa_strain_DSM_50071_(NR_117678.1)
H	6235	253	100	+	0	0	526I253M758I	R484	Xylella_fastidiosa_strain_PCE-FF_(NR_041779.1)						H	13694	253	100	+	0	0	518I253M756I	R483	Pseudomonas_aeruginosa_strain_DSM_50071_(NR_117678.1)
H	6235	253	100	+	0	0	526I253M758I	R485	Xylella_fastidiosa_strain_PCE-FF_(NR_041779.1)						H	13694	253	100	+	0	0	518I253M756I	R484	Pseudomonas_aeruginosa_strain_DSM_50071_(NR_117678.1)
H	6235	253	100	+	0	0	526I253M758I	R486	Xylella_fastidiosa_strain_PCE-FF_(NR_041779.1)						H	13694	253	100	+	0	0	518I253M756I	R485	Pseudomonas_aeruginosa_strain_DSM_50071_(NR_117678.1)
H	6235	253	100	+	0	0	526I253M758I	R487	Xylella_fastidiosa_strain_PCE-FF_(NR_041779.1)						H	13694	253	100	+	0	0	518I253M756I	R486	Pseudomonas_aeruginosa_strain_DSM_50071_(NR_117678.1)
H	6235	253	100	+	0	0	526I253M758I	R488	Xylella_fastidiosa_strain_PCE-FF_(NR_041779.1)						H	13694	253	100	+	0	0	518I253M756I	R487	Pseudomonas_aeruginosa_strain_DSM_50071_(NR_117678.1)
H	6235	253	100	+	0	0	526I253M758I	R489	Xylella_fastidiosa_strain_PCE-FF_(NR_041779.1)						H	13694	253	100	+	0	0	518I253M756I	R488	Pseudomonas_aeruginosa_strain_DSM_50071_(NR_117678.1)
H	6235	253	100	+	0	0	526I253M758I	R490	Xylella_fastidiosa_strain_PCE-FF_(NR_041779.1)						H	13694	253	100	+	0	0	518I253M756I	R490	Pseudomonas_aeruginosa_strain_DSM_50071_(NR_117678.1)
H	6235	253	100	+	0	0	526I253M758I	R492	Xylella_fastidiosa_strain_PCE-FF_(NR_041779.1)						H	13694	253	100	+	0	0	518I253M756I	R491	Pseudomonas_aeruginosa_strain_DSM_50071_(NR_117678.1)
H	6235	253	100	+	0	0	526I253M758I	R493	Xylella_fastidiosa_strain_PCE-FF_(NR_041779.1)						H	13694	253	100	+	0	0	518I253M756I	R489	Pseudomonas_aeruginosa_strain_DSM_50071_(NR_117678.1)
H	6235	253	100	+	0	0	526I253M758I	R491	Xylella_fastidiosa_strain_PCE-FF_(NR_041779.1)						H	13694	253	100	+	0	0	518I253M756I	R492	Pseudomonas_aeruginosa_strain_DSM_50071_(NR_117678.1)
H	13694	253	100	+	0	0	518I253M756I	R494	Pseudomonas_aeruginosa_strain_DSM_50071_(NR_117678.1)						H	13694	253	100	+	0	0	518I253M756I	R493	Pseudomonas_aeruginosa_strain_DSM_50071_(NR_117678.1)
H	13694	253	100	+	0	0	518I253M756I	R495	Pseudomonas_aeruginosa_strain_DSM_50071_(NR_117678.1)						H	13694	253	100	+	0	0	518I253M756I	R494	Pseudomonas_aeruginosa_strain_DSM_50071_(NR_117678.1)
H	13694	253	100	+	0	0	518I253M756I	R496	Pseudomonas_aeruginosa_strain_DSM_50071_(NR_117678.1)						H	13694	253	100	+	0	0	518I253M756I	R495	Pseudomonas_aeruginosa_strain_DSM_50071_(NR_117678.1)
H	13694	253	100	+	0	0	518I253M756I	R497	Pseudomonas_aeruginosa_strain_DSM_50071_(NR_117678.1)						H	13694	253	100	+	0	0	518I253M756I	R496	Pseudomonas_aeruginosa_strain_DSM_50071_(NR_117678.1)
H	13694	253	100	+	0	0	518I253M756I	R500	Pseudomonas_aeruginosa_strain_DSM_50071_(NR_117678.1)						H	13694	253	100	+	0	0	518I253M756I	R497	Pseudomonas_aeruginosa_strain_DSM_50071_(NR_117678.1)
H	13694	253	100	+	0	0	518I253M756I	R499	Pseudomonas_aeruginosa_strain_DSM_50071_(NR_117678.1)						H	13694	253	100	+	0	0	518I253M756I	R498	Pseudomonas_aeruginosa_strain_DSM_50071_(NR_117678.1)
H	13694	253	100	+	0	0	518I253M756I	R498	Pseudomonas_aeruginosa_strain_DSM_50071_(NR_117678.1)						H	13694	253	100	+	0	0	518I253M756I	R499	Pseudomonas_aeruginosa_strain_DSM_50071_(NR_117678.1)
H	13694	253	100	+	0	0	518I253M756I	R501	Pseudomonas_aeruginosa_strain_DSM_50071_(NR_117678.1)						H	13694	253	100	+	0	0	518I253M756I	R500	Pseudomonas_aeruginosa_strain_DSM_50071_(NR_117678.1)
H	13694	253	100	+	0	0	518I253M756I	R502	Pseudomonas_aeruginosa_strain_DSM_50071_(NR_117678.1)						H	13694	253	100	+	0	0	518I253M756I	R501	Pseudomonas_aeruginosa_strain_DSM_50071_(NR_117678.1)
H	13694	253	100	+	0	0	518I253M756I	R503	Pseudomonas_aeruginosa_strain_DSM_50071_(NR_117678.1)						H	13694	253	100	+	0	0	518I253M756I	R502	Pseudomonas_aeruginosa_strain_DSM_50071_(NR_117678.1)
H	13694	253	100	+	0	0	518I253M756I	R504	Pseudomonas_aeruginosa_strain_DSM_50071_(NR_117678.1)						H	13694	253	100	+	0	0	518I253M756I	R503	Pseudomonas_aeruginosa_strain_DSM_50071_(NR_117678.1)
H	13694	253	100	+	0	0	518I253M756I	R505	Pseudomonas_aeruginosa_strain_DSM_50071_(NR_117678.1)						H	13694	253	100	+	0	0	518I253M756I	R504	Pseudomonas_aeruginosa_strain_DSM_50071_(NR_117678.1)
H	13694	253	100	+	0	0	518I253M756I	R506	Pseudomonas_aeruginosa_strain_DSM_50071_(NR_117678.1)						H	13694	253	100	+	0	0	518I253M756I	R505	Pseudomonas_aeruginosa_strain_DSM_50071_(NR_117678.1)
H	13694	253	100	+	0	0	518I253M756I	R508	Pseudomonas_aeruginosa_strain_DSM_50071_(NR_117678.1)						H	13694	253	100	+	0	0	518I253M756I	R506	Pseudomonas_aeruginosa_strain_DSM_50071_(NR_117678.1)
H	13694	253	100	+	0	0	518I253M756I	R507	Pseudomonas_aeruginosa_strain_DSM_50071_(NR_117678.1)						H	13694	253	100	+	0	0	518I253M756I	R507	Pseudomonas_aeruginosa_strain_DSM_50071_(NR_117678.1)
H	13694	253	100	+	0	0	518I253M756I	R509	Pseudomonas_aeruginosa_strain_DSM_50071_(NR_117678.1)						H	13694	253	100	+	0	0	518I253M756I	R508	Pseudomonas_aeruginosa_strain_DSM_50071_(NR_117678.1)
H	13694	253	100	+	0	0	518I253M756I	R510	Pseudomonas_aeruginosa_strain_DSM_50071_(NR_117678.1)						H	13694	253	100	+	0	0	518I253M756I	R509	Pseudomonas_aeruginosa_strain_DSM_50071_(NR_117678.1)
H	13694	253	100	+	0	0	518I253M756I	R511	Pseudomonas_aeruginosa_strain_DSM_50071_(NR_117678.1)						H	13694	253	100	+	0	0	518I253M756I	R510	Pseudomonas_aeruginosa_strain_DSM_50071_(NR_117678.1)
H	13694	253	100	+	0	0	518I253M756I	R512	Pseudomonas_aeruginosa_strain_DSM_50071_(NR_117678.1)						H	13694	253	100	+	0	0	518I253M756I	R511	Pseudomonas_aeruginosa_strain_DSM_50071_(NR_117678.1)
H	13694	253	100	+	0	0	518I253M756I	R513	Pseudomonas_aeruginosa_strain_DSM_50071_(NR_117678.1)						H	13694	253	100	+	0	0	518I253M756I	R512	Pseudomonas_aeruginosa_strain_DSM_50071_(NR_117678.1)
H	13694	253	100	+	0	0	518I253M756I	R514	Pseudomonas_aeruginosa_strain_DSM_50071_(NR_117678.1)						H	13694	253	100	+	0	0	518I253M756I	R513	Pseudomonas_aeruginosa_strain_DSM_50071_(NR_117678.1)
H	13694	253	100	+	0	0	518I253M756I	R515	Pseudomonas_aeruginosa_strain_DSM_50071_(NR_117678.1)						H	13694	253	100	+	0	0	518I253M756I	R514	Pseudomonas_aeruginosa_strain_DSM_50071_(NR_117678.1)
H	13694	253	100	+	0	0	518I253M756I	R516	Pseudomonas_aeruginosa_strain_DSM_50071_(NR_117678.1)						H	13694	253	100	+	0	0	518I253M756I	R515	Pseudomonas_aeruginosa_strain_DSM_50071_(NR_117678.1)
H	13694	253	100	+	0	0	518I253M756I	R517	Pseudomonas_aeruginosa_strain_DSM_50071_(NR_117678.1)						H	13694	253	100	+	0	0	518I253M756I	R517	Pseudomonas_aeruginosa_strain_DSM_50071_(NR_117678.1)
H	13694	253	100	+	0	0	518I253M756I	R518	Pseudomonas_aeruginosa_strain_DSM_50071_(NR_117678.1)						H	13694	253	100	+	0	0	518I253M756I	R518	Pseudomonas_aeruginosa_strain_DSM_50071_(NR_117678.1)
H	13694	253	100	+	0	0	518I253M756I	R519	Pseudomonas_aeruginosa_strain_DSM_50071_(NR_117678.1)						H	13694	253	100	+	0	0	518I253M756I	R516	Pseudomonas_aeruginosa_strain_DSM_50071_(NR_117678.1)
H	13694	253	100	+	0	0	518I253M756I	R520	Pseudomonas_aeruginosa_strain_DSM_50071_(NR_117678.1)						H	10349	253	100	+	0	0	439I253M703I	R519	Paracoccus_denitrificans_strain_381_(NR_026456.1)
H	13694	253	100	+	0	0	518I253M756I	R521	Pseudomonas_aeruginosa_strain_DSM_50071_(NR_117678.1)						H	10349	253	100	+	0	0	439I253M703I	R520	Paracoccus_denitrificans_strain_381_(NR_026456.1)
H	13694	253	100	+	0	0	518I253M756I	R522	Pseudomonas_aeruginosa_strain_DSM_50071_(NR_117678.1)						H	10349	253	100	+	0	0	439I253M703I	R521	Paracoccus_denitrificans_strain_381_(NR_026456.1)
H	13694	253	100	+	0	0	518I253M756I	R523	Pseudomonas_aeruginosa_strain_DSM_50071_(NR_117678.1)						H	10349	253	100	+	0	0	439I253M703I	R522	Paracoccus_denitrificans_strain_381_(NR_026456.1)
H	13694	253	100	+	0	0	518I253M756I	R524	Pseudomonas_aeruginosa_strain_DSM_50071_(NR_117678.1)						H	10349	253	100	+	0	0	439I253M703I	R523	Paracoccus_denitrificans_strain_381_(NR_026456.1)
H	13694	253	100	+	0	0	518I253M756I	R527	Pseudomonas_aeruginosa_strain_DSM_50071_(NR_117678.1)						H	10349	253	100	+	0	0	439I253M703I	R525	Paracoccus_denitrificans_strain_381_(NR_026456.1)
H	13694	253	100	+	0	0	518I253M756I	R526	Pseudomonas_aeruginosa_strain_DSM_50071_(NR_117678.1)						H	10349	253	100	+	0	0	439I253M703I	R524	Paracoccus_denitrificans_strain_381_(NR_026456.1)
H	13694	253	100	+	0	0	518I253M756I	R528	Pseudomonas_aeruginosa_strain_DSM_50071_(NR_117678.1)						H	10349	253	100	+	0	0	439I253M703I	R527	Paracoccus_denitrificans_strain_381_(NR_026456.1)
H	13694	253	100	+	0	0	518I253M756I	R525	Pseudomonas_aeruginosa_strain_DSM_50071_(NR_117678.1)						H	10349	253	100	+	0	0	439I253M703I	R528	Paracoccus_denitrificans_strain_381_(NR_026456.1)
H	13694	253	100	+	0	0	518I253M756I	R529	Pseudomonas_aeruginosa_strain_DSM_50071_(NR_117678.1)						H	10349	253	100	+	0	0	439I253M703I	R529	Paracoccus_denitrificans_strain_381_(NR_026456.1)
H	13694	253	100	+	0	0	518I253M756I	R530	Pseudomonas_aeruginosa_strain_DSM_50071_(NR_117678.1)						H	10349	253	100	+	0	0	439I253M703I	R530	Paracoccus_denitrificans_strain_381_(NR_026456.1)
H	13694	253	100	+	0	0	518I253M756I	R531	Pseudomonas_aeruginosa_strain_DSM_50071_(NR_117678.1)						H	10349	253	100	+	0	0	439I253M703I	R526	Paracoccus_denitrificans_strain_381_(NR_026456.1)
H	13694	253	100	+	0	0	518I253M756I	R532	Pseudomonas_aeruginosa_strain_DSM_50071_(NR_117678.1)						H	10349	253	100	+	0	0	439I253M703I	R531	Paracoccus_denitrificans_strain_381_(NR_026456.1)
H	13694	253	100	+	0	0	518I253M756I	R533	Pseudomonas_aeruginosa_strain_DSM_50071_(NR_117678.1)						H	10349	253	100	+	0	0	439I253M703I	R532	Paracoccus_denitrificans_strain_381_(NR_026456.1)
H	13694	253	100	+	0	0	518I253M756I	R534	Pseudomonas_aeruginosa_strain_DSM_50071_(NR_117678.1)						H	10349	253	100	+	0	0	439I253M703I	R534	Paracoccus_denitrificans_strain_381_(NR_026456.1)
H	13694	253	100	+	0	0	518I253M756I	R535	Pseudomonas_aeruginosa_strain_DSM_50071_(NR_117678.1)						H	10349	253	100	+	0	0	439I253M703I	R533	Paracoccus_denitrificans_strain_381_(NR_026456.1)
H	8319	252	100	+	0	0	519I252M718I	R383	Schwartzia_succinivorans_strain_S1-1_(NR_029325.1)						H	10349	253	100	+	0	0	439I253M703I	R536	Paracoccus_denitrificans_strain_381_(NR_026456.1)
H	13694	253	100	+	0	0	518I253M756I	R536	Pseudomonas_aeruginosa_strain_DSM_50071_(NR_117678.1)						H	10349	253	100	+	0	0	439I253M703I	R535	Paracoccus_denitrificans_strain_381_(NR_026456.1)
H	13694	253	100	+	0	0	518I253M756I	R537	Pseudomonas_aeruginosa_strain_DSM_50071_(NR_117678.1)						H	10349	253	100	+	0	0	439I253M703I	R537	Paracoccus_denitrificans_strain_381_(NR_026456.1)
H	13694	253	100	+	0	0	518I253M756I	R538	Pseudomonas_aeruginosa_strain_DSM_50071_(NR_117678.1)						H	10349	253	100	+	0	0	439I253M703I	R538	Paracoccus_denitrificans_strain_381_(NR_026456.1)
H	13694	253	100	+	0	0	518I253M756I	R539	Pseudomonas_aeruginosa_strain_DSM_50071_(NR_117678.1)						H	10349	253	100	+	0	0	439I253M703I	R539	Paracoccus_denitrificans_strain_381_(NR_026456.1)
H	13694	253	100	+	0	0	518I253M756I	R541	Pseudomonas_aeruginosa_strain_DSM_50071_(NR_117678.1)						H	10349	253	100	+	0	0	439I253M703I	R540	Paracoccus_denitrificans_strain_381_(NR_026456.1)
H	13694	253	100	+	0	0	518I253M756I	R542	Pseudomonas_aeruginosa_strain_DSM_50071_(NR_117678.1)						H	10349	253	100	+	0	0	439I253M703I	R541	Paracoccus_denitrificans_strain_381_(NR_026456.1)
H	13694	253	100	+	0	0	518I253M756I	R540	Pseudomonas_aeruginosa_strain_DSM_50071_(NR_117678.1)						H	10349	253	100	+	0	0	439I253M703I	R542	Paracoccus_denitrificans_strain_381_(NR_026456.1)
H	13694	253	100	+	0	0	518I253M756I	R543	Pseudomonas_aeruginosa_strain_DSM_50071_(NR_117678.1)						H	10349	253	100	+	0	0	439I253M703I	R543	Paracoccus_denitrificans_strain_381_(NR_026456.1)
H	13694	253	100	+	0	0	518I253M756I	R544	Pseudomonas_aeruginosa_strain_DSM_50071_(NR_117678.1)						H	10349	253	100	+	0	0	439I253M703I	R544	Paracoccus_denitrificans_strain_381_(NR_026456.1)
H	13694	253	100	+	0	0	518I253M756I	R545	Pseudomonas_aeruginosa_strain_DSM_50071_(NR_117678.1)						H	10349	253	100	+	0	0	439I253M703I	R545	Paracoccus_denitrificans_strain_381_(NR_026456.1)
H	13694	253	100	+	0	0	518I253M756I	R546	Pseudomonas_aeruginosa_strain_DSM_50071_(NR_117678.1)						H	10349	253	100	+	0	0	439I253M703I	R546	Paracoccus_denitrificans_strain_381_(NR_026456.1)
H	13694	253	100	+	0	0	518I253M756I	R547	Pseudomonas_aeruginosa_strain_DSM_50071_(NR_117678.1)						H	10349	253	100	+	0	0	439I253M703I	R547	Paracoccus_denitrificans_strain_381_(NR_026456.1)
H	13694	253	100	+	0	0	518I253M756I	R549	Pseudomonas_aeruginosa_strain_DSM_50071_(NR_117678.1)						H	10349	253	100	+	0	0	439I253M703I	R549	Paracoccus_denitrificans_strain_381_(NR_026456.1)
H	13694	253	100	+	0	0	518I253M756I	R548	Pseudomonas_aeruginosa_strain_DSM_50071_(NR_117678.1)						H	10349	253	100	+	0	0	439I253M703I	R548	Paracoccus_denitrificans_strain_381_(NR_026456.1)
H	13694	253	100	+	0	0	518I253M756I	R550	Pseudomonas_aeruginosa_strain_DSM_50071_(NR_117678.1)						H	10349	253	100	+	0	0	439I253M703I	R550	Paracoccus_denitrificans_strain_381_(NR_026456.1)
H	13694	253	100	+	0	0	518I253M756I	R551	Pseudomonas_aeruginosa_strain_DSM_50071_(NR_117678.1)						H	10349	253	100	+	0	0	439I253M703I	R551	Paracoccus_denitrificans_strain_381_(NR_026456.1)
H	13694	253	100	+	0	0	518I253M756I	R552	Pseudomonas_aeruginosa_strain_DSM_50071_(NR_117678.1)						H	10349	253	100	+	0	0	439I253M703I	R552	Paracoccus_denitrificans_strain_381_(NR_026456.1)
H	13694	253	100	+	0	0	518I253M756I	R553	Pseudomonas_aeruginosa_strain_DSM_50071_(NR_117678.1)						H	10349	253	100	+	0	0	439I253M703I	R553	Paracoccus_denitrificans_strain_381_(NR_026456.1)
H	13694	253	100	+	0	0	518I253M756I	R554	Pseudomonas_aeruginosa_strain_DSM_50071_(NR_117678.1)						H	10349	253	100	+	0	0	439I253M703I	R554	Paracoccus_denitrificans_strain_381_(NR_026456.1)
H	13694	253	100	+	0	0	518I253M756I	R556	Pseudomonas_aeruginosa_strain_DSM_50071_(NR_117678.1)						H	10349	253	100	+	0	0	439I253M703I	R555	Paracoccus_denitrificans_strain_381_(NR_026456.1)
H	13694	253	100	+	0	0	518I253M756I	R557	Pseudomonas_aeruginosa_strain_DSM_50071_(NR_117678.1)						H	10349	253	100	+	0	0	439I253M703I	R556	Paracoccus_denitrificans_strain_381_(NR_026456.1)
H	13694	253	100	+	0	0	518I253M756I	R555	Pseudomonas_aeruginosa_strain_DSM_50071_(NR_117678.1)						H	10349	253	100	+	0	0	439I253M703I	R557	Paracoccus_denitrificans_strain_381_(NR_026456.1)
H	13694	253	100	+	0	0	518I253M756I	R558	Pseudomonas_aeruginosa_strain_DSM_50071_(NR_117678.1)						H	10349	253	100	+	0	0	439I253M703I	R558	Paracoccus_denitrificans_strain_381_(NR_026456.1)
H	13694	253	100	+	0	0	518I253M756I	R559	Pseudomonas_aeruginosa_strain_DSM_50071_(NR_117678.1)						H	10349	253	100	+	0	0	439I253M703I	R561	Paracoccus_denitrificans_strain_381_(NR_026456.1)
H	13694	253	100	+	0	0	518I253M756I	R560	Pseudomonas_aeruginosa_strain_DSM_50071_(NR_117678.1)						H	10349	253	100	+	0	0	439I253M703I	R560	Paracoccus_denitrificans_strain_381_(NR_026456.1)
H	13694	253	100	+	0	0	518I253M756I	R561	Pseudomonas_aeruginosa_strain_DSM_50071_(NR_117678.1)						H	10349	253	100	+	0	0	439I253M703I	R559	Paracoccus_denitrificans_strain_381_(NR_026456.1)
H	13694	253	100	+	0	0	518I253M756I	R563	Pseudomonas_aeruginosa_strain_DSM_50071_(NR_117678.1)						H	10349	253	100	+	0	0	439I253M703I	R562	Paracoccus_denitrificans_strain_381_(NR_026456.1)
H	13694	253	100	+	0	0	518I253M756I	R564	Pseudomonas_aeruginosa_strain_DSM_50071_(NR_117678.1)						H	10349	253	100	+	0	0	439I253M703I	R563	Paracoccus_denitrificans_strain_381_(NR_026456.1)
H	13694	253	100	+	0	0	518I253M756I	R565	Pseudomonas_aeruginosa_strain_DSM_50071_(NR_117678.1)						H	10349	253	100	+	0	0	439I253M703I	R564	Paracoccus_denitrificans_strain_381_(NR_026456.1)
H	13694	253	100	+	0	0	518I253M756I	R562	Pseudomonas_aeruginosa_strain_DSM_50071_(NR_117678.1)						H	10349	253	100	+	0	0	439I253M703I	R565	Paracoccus_denitrificans_strain_381_(NR_026456.1)
H	13694	253	100	+	0	0	518I253M756I	R566	Pseudomonas_aeruginosa_strain_DSM_50071_(NR_117678.1)						H	10349	253	100	+	0	0	439I253M703I	R566	Paracoccus_denitrificans_strain_381_(NR_026456.1)
H	13694	253	100	+	0	0	518I253M756I	R568	Pseudomonas_aeruginosa_strain_DSM_50071_(NR_117678.1)						H	10349	253	100	+	0	0	439I253M703I	R567	Paracoccus_denitrificans_strain_381_(NR_026456.1)
H	13694	253	100	+	0	0	518I253M756I	R567	Pseudomonas_aeruginosa_strain_DSM_50071_(NR_117678.1)						H	10349	253	100	+	0	0	439I253M703I	R568	Paracoccus_denitrificans_strain_381_(NR_026456.1)
H	13694	253	100	+	0	0	518I253M756I	R569	Pseudomonas_aeruginosa_strain_DSM_50071_(NR_117678.1)						H	10349	253	100	+	0	0	439I253M703I	R569	Paracoccus_denitrificans_strain_381_(NR_026456.1)
H	13694	253	100	+	0	0	518I253M756I	R570	Pseudomonas_aeruginosa_strain_DSM_50071_(NR_117678.1)						H	10349	253	100	+	0	0	439I253M703I	R570	Paracoccus_denitrificans_strain_381_(NR_026456.1)
H	13694	253	100	+	0	0	518I253M756I	R571	Pseudomonas_aeruginosa_strain_DSM_50071_(NR_117678.1)						H	10349	253	100	+	0	0	439I253M703I	R571	Paracoccus_denitrificans_strain_381_(NR_026456.1)
H	13694	253	100	+	0	0	518I253M756I	R572	Pseudomonas_aeruginosa_strain_DSM_50071_(NR_117678.1)						H	10349	253	100	+	0	0	439I253M703I	R572	Paracoccus_denitrificans_strain_381_(NR_026456.1)
H	13694	253	100	+	0	0	518I253M756I	R573	Pseudomonas_aeruginosa_strain_DSM_50071_(NR_117678.1)						H	10349	253	100	+	0	0	439I253M703I	R573	Paracoccus_denitrificans_strain_381_(NR_026456.1)
H	13694	253	100	+	0	0	518I253M756I	R574	Pseudomonas_aeruginosa_strain_DSM_50071_(NR_117678.1)						H	10349	253	100	+	0	0	439I253M703I	R574	Paracoccus_denitrificans_strain_381_(NR_026456.1)
H	13694	253	100	+	0	0	518I253M756I	R576	Pseudomonas_aeruginosa_strain_DSM_50071_(NR_117678.1)						H	10349	253	100	+	0	0	439I253M703I	R575	Paracoccus_denitrificans_strain_381_(NR_026456.1)
H	13694	253	100	+	0	0	518I253M756I	R575	Pseudomonas_aeruginosa_strain_DSM_50071_(NR_117678.1)						H	10349	253	100	+	0	0	439I253M703I	R577	Paracoccus_denitrificans_strain_381_(NR_026456.1)
H	13694	253	100	+	0	0	518I253M756I	R578	Pseudomonas_aeruginosa_strain_DSM_50071_(NR_117678.1)						H	10349	253	100	+	0	0	439I253M703I	R578	Paracoccus_denitrificans_strain_381_(NR_026456.1)
H	13694	253	100	+	0	0	518I253M756I	R580	Pseudomonas_aeruginosa_strain_DSM_50071_(NR_117678.1)						H	10349	253	100	+	0	0	439I253M703I	R576	Paracoccus_denitrificans_strain_381_(NR_026456.1)
H	13694	253	100	+	0	0	518I253M756I	R579	Pseudomonas_aeruginosa_strain_DSM_50071_(NR_117678.1)						H	10349	253	100	+	0	0	439I253M703I	R579	Paracoccus_denitrificans_strain_381_(NR_026456.1)
H	13694	253	100	+	0	0	518I253M756I	R577	Pseudomonas_aeruginosa_strain_DSM_50071_(NR_117678.1)						H	4855	253	99.6	+	0	0	542I253M755I	R582	Exiguobacterium_acetylicum_strain_DSM_20416_(NR_043479.1)
H	13694	253	100	+	0	0	518I253M756I	R582	Pseudomonas_aeruginosa_strain_DSM_50071_(NR_117678.1)						H	10349	253	100	+	0	0	439I253M703I	R581	Paracoccus_denitrificans_strain_381_(NR_026456.1)
H	13694	253	100	+	0	0	518I253M756I	R581	Pseudomonas_aeruginosa_strain_DSM_50071_(NR_117678.1)						H	10349	253	100	+	0	0	439I253M703I	R580	Paracoccus_denitrificans_strain_381_(NR_026456.1)
H	13694	253	100	+	0	0	518I253M756I	R583	Pseudomonas_aeruginosa_strain_DSM_50071_(NR_117678.1)						H	4855	253	99.6	+	0	0	542I253M755I	R583	Exiguobacterium_acetylicum_strain_DSM_20416_(NR_043479.1)
H	13694	253	100	+	0	0	518I253M756I	R585	Pseudomonas_aeruginosa_strain_DSM_50071_(NR_117678.1)						H	4855	253	99.6	+	0	0	542I253M755I	R584	Exiguobacterium_acetylicum_strain_DSM_20416_(NR_043479.1)
H	13694	253	100	+	0	0	518I253M756I	R586	Pseudomonas_aeruginosa_strain_DSM_50071_(NR_117678.1)						H	4855	253	99.6	+	0	0	542I253M755I	R585	Exiguobacterium_acetylicum_strain_DSM_20416_(NR_043479.1)
H	13694	253	100	+	0	0	518I253M756I	R587	Pseudomonas_aeruginosa_strain_DSM_50071_(NR_117678.1)						H	4855	253	99.6	+	0	0	542I253M755I	R586	Exiguobacterium_acetylicum_strain_DSM_20416_(NR_043479.1)
H	13694	253	100	+	0	0	518I253M756I	R584	Pseudomonas_aeruginosa_strain_DSM_50071_(NR_117678.1)						H	4855	253	99.6	+	0	0	542I253M755I	R587	Exiguobacterium_acetylicum_strain_DSM_20416_(NR_043479.1)
H	13694	253	100	+	0	0	518I253M756I	R589	Pseudomonas_aeruginosa_strain_DSM_50071_(NR_117678.1)						H	4855	253	99.6	+	0	0	542I253M755I	R588	Exiguobacterium_acetylicum_strain_DSM_20416_(NR_043479.1)
H	13694	253	100	+	0	0	518I253M756I	R588	Pseudomonas_aeruginosa_strain_DSM_50071_(NR_117678.1)						H	4855	253	99.6	+	0	0	542I253M755I	R589	Exiguobacterium_acetylicum_strain_DSM_20416_(NR_043479.1)
H	13694	253	100	+	0	0	518I253M756I	R590	Pseudomonas_aeruginosa_strain_DSM_50071_(NR_117678.1)						H	4855	253	99.6	+	0	0	542I253M755I	R590	Exiguobacterium_acetylicum_strain_DSM_20416_(NR_043479.1)
H	13694	253	100	+	0	0	518I253M756I	R591	Pseudomonas_aeruginosa_strain_DSM_50071_(NR_117678.1)						H	4855	253	99.6	+	0	0	542I253M755I	R591	Exiguobacterium_acetylicum_strain_DSM_20416_(NR_043479.1)
H	13694	253	100	+	0	0	518I253M756I	R592	Pseudomonas_aeruginosa_strain_DSM_50071_(NR_117678.1)						H	4855	253	99.6	+	0	0	542I253M755I	R592	Exiguobacterium_acetylicum_strain_DSM_20416_(NR_043479.1)
H	13694	253	100	+	0	0	518I253M756I	R593	Pseudomonas_aeruginosa_strain_DSM_50071_(NR_117678.1)						H	4855	253	99.6	+	0	0	542I253M755I	R593	Exiguobacterium_acetylicum_strain_DSM_20416_(NR_043479.1)
H	10349	253	100	+	0	0	439I253M703I	R594	Paracoccus_denitrificans_strain_381_(NR_026456.1)						H	4855	253	99.6	+	0	0	542I253M755I	R594	Exiguobacterium_acetylicum_strain_DSM_20416_(NR_043479.1)
H	10349	253	100	+	0	0	439I253M703I	R595	Paracoccus_denitrificans_strain_381_(NR_026456.1)						H	4855	253	99.6	+	0	0	542I253M755I	R595	Exiguobacterium_acetylicum_strain_DSM_20416_(NR_043479.1)
H	10349	253	100	+	0	0	439I253M703I	R596	Paracoccus_denitrificans_strain_381_(NR_026456.1)						H	4855	253	99.6	+	0	0	542I253M755I	R596	Exiguobacterium_acetylicum_strain_DSM_20416_(NR_043479.1)
H	10349	253	100	+	0	0	439I253M703I	R598	Paracoccus_denitrificans_strain_381_(NR_026456.1)						H	2359	253	97.6	+	0	0	528I253M750I	R598	Hydrotalea_sandarakina_strain_AF-51_(NR_109380.1)
H	10349	253	100	+	0	0	439I253M703I	R599	Paracoccus_denitrificans_strain_381_(NR_026456.1)						H	4855	253	99.6	+	0	0	542I253M755I	R597	Exiguobacterium_acetylicum_strain_DSM_20416_(NR_043479.1)
H	10349	253	100	+	0	0	439I253M703I	R597	Paracoccus_denitrificans_strain_381_(NR_026456.1)						H	2359	253	97.6	+	0	0	528I253M750I	R599	Hydrotalea_sandarakina_strain_AF-51_(NR_109380.1)
H	10349	253	100	+	0	0	439I253M703I	R600	Paracoccus_denitrificans_strain_381_(NR_026456.1)						H	2359	253	97.6	+	0	0	528I253M750I	R600	Hydrotalea_sandarakina_strain_AF-51_(NR_109380.1)
H	10349	253	100	+	0	0	439I253M703I	R601	Paracoccus_denitrificans_strain_381_(NR_026456.1)						H	2359	253	97.6	+	0	0	528I253M750I	R601	Hydrotalea_sandarakina_strain_AF-51_(NR_109380.1)
H	10349	253	100	+	0	0	439I253M703I	R602	Paracoccus_denitrificans_strain_381_(NR_026456.1)						H	2359	253	97.6	+	0	0	528I253M750I	R602	Hydrotalea_sandarakina_strain_AF-51_(NR_109380.1)
H	10349	253	100	+	0	0	439I253M703I	R603	Paracoccus_denitrificans_strain_381_(NR_026456.1)						H	2359	253	97.6	+	0	0	528I253M750I	R603	Hydrotalea_sandarakina_strain_AF-51_(NR_109380.1)
H	10349	253	100	+	0	0	439I253M703I	R604	Paracoccus_denitrificans_strain_381_(NR_026456.1)						H	2359	253	97.6	+	0	0	528I253M750I	R604	Hydrotalea_sandarakina_strain_AF-51_(NR_109380.1)
H	10349	253	100	+	0	0	439I253M703I	R605	Paracoccus_denitrificans_strain_381_(NR_026456.1)						H	2359	253	97.6	+	0	0	528I253M750I	R605	Hydrotalea_sandarakina_strain_AF-51_(NR_109380.1)
H	10349	253	100	+	0	0	439I253M703I	R606	Paracoccus_denitrificans_strain_381_(NR_026456.1)						H	2359	253	97.6	+	0	0	528I253M750I	R606	Hydrotalea_sandarakina_strain_AF-51_(NR_109380.1)
H	10349	253	100	+	0	0	439I253M703I	R608	Paracoccus_denitrificans_strain_381_(NR_026456.1)						H	2359	253	97.6	+	0	0	528I253M750I	R607	Hydrotalea_sandarakina_strain_AF-51_(NR_109380.1)
H	10349	253	100	+	0	0	439I253M703I	R609	Paracoccus_denitrificans_strain_381_(NR_026456.1)						H	2359	253	97.6	+	0	0	528I253M750I	R608	Hydrotalea_sandarakina_strain_AF-51_(NR_109380.1)
H	10349	253	100	+	0	0	439I253M703I	R610	Paracoccus_denitrificans_strain_381_(NR_026456.1)						H	2359	253	97.6	+	0	0	528I253M750I	R609	Hydrotalea_sandarakina_strain_AF-51_(NR_109380.1)
H	10349	253	100	+	0	0	439I253M703I	R607	Paracoccus_denitrificans_strain_381_(NR_026456.1)						H	2359	253	97.6	+	0	0	528I253M750I	R610	Hydrotalea_sandarakina_strain_AF-51_(NR_109380.1)
H	10349	253	100	+	0	0	439I253M703I	R612	Paracoccus_denitrificans_strain_381_(NR_026456.1)						H	2359	253	97.6	+	0	0	528I253M750I	R611	Hydrotalea_sandarakina_strain_AF-51_(NR_109380.1)
H	10349	253	100	+	0	0	439I253M703I	R611	Paracoccus_denitrificans_strain_381_(NR_026456.1)						H	2359	253	97.6	+	0	0	528I253M750I	R612	Hydrotalea_sandarakina_strain_AF-51_(NR_109380.1)
H	10349	253	100	+	0	0	439I253M703I	R613	Paracoccus_denitrificans_strain_381_(NR_026456.1)						H	2359	253	97.6	+	0	0	528I253M750I	R613	Hydrotalea_sandarakina_strain_AF-51_(NR_109380.1)
H	10349	253	100	+	0	0	439I253M703I	R614	Paracoccus_denitrificans_strain_381_(NR_026456.1)						H	2359	253	97.6	+	0	0	528I253M750I	R614	Hydrotalea_sandarakina_strain_AF-51_(NR_109380.1)
H	10349	253	100	+	0	0	439I253M703I	R616	Paracoccus_denitrificans_strain_381_(NR_026456.1)						H	2359	253	97.6	+	0	0	528I253M750I	R615	Hydrotalea_sandarakina_strain_AF-51_(NR_109380.1)
H	10349	253	100	+	0	0	439I253M703I	R617	Paracoccus_denitrificans_strain_381_(NR_026456.1)						H	2359	253	97.6	+	0	0	528I253M750I	R616	Hydrotalea_sandarakina_strain_AF-51_(NR_109380.1)
H	10349	253	100	+	0	0	439I253M703I	R618	Paracoccus_denitrificans_strain_381_(NR_026456.1)						H	2359	253	97.6	+	0	0	528I253M750I	R617	Hydrotalea_sandarakina_strain_AF-51_(NR_109380.1)
H	10349	253	100	+	0	0	439I253M703I	R620	Paracoccus_denitrificans_strain_381_(NR_026456.1)						H	2359	253	97.6	+	0	0	528I253M750I	R618	Hydrotalea_sandarakina_strain_AF-51_(NR_109380.1)
H	10349	253	100	+	0	0	439I253M703I	R619	Paracoccus_denitrificans_strain_381_(NR_026456.1)						H	2359	253	97.6	+	0	0	528I253M750I	R619	Hydrotalea_sandarakina_strain_AF-51_(NR_109380.1)
H	10349	253	100	+	0	0	439I253M703I	R615	Paracoccus_denitrificans_strain_381_(NR_026456.1)						H	2359	253	97.6	+	0	0	528I253M750I	R620	Hydrotalea_sandarakina_strain_AF-51_(NR_109380.1)
H	10349	253	100	+	0	0	439I253M703I	R621	Paracoccus_denitrificans_strain_381_(NR_026456.1)						H	2359	253	97.6	+	0	0	528I253M750I	R621	Hydrotalea_sandarakina_strain_AF-51_(NR_109380.1)
H	10349	253	100	+	0	0	439I253M703I	R622	Paracoccus_denitrificans_strain_381_(NR_026456.1)						H	2359	253	97.6	+	0	0	528I253M750I	R622	Hydrotalea_sandarakina_strain_AF-51_(NR_109380.1)
H	10349	253	100	+	0	0	439I253M703I	R623	Paracoccus_denitrificans_strain_381_(NR_026456.1)						H	2359	253	97.6	+	0	0	528I253M750I	R623	Hydrotalea_sandarakina_strain_AF-51_(NR_109380.1)
H	10349	253	100	+	0	0	439I253M703I	R624	Paracoccus_denitrificans_strain_381_(NR_026456.1)						H	2359	253	97.6	+	0	0	528I253M750I	R625	Hydrotalea_sandarakina_strain_AF-51_(NR_109380.1)
H	10349	253	100	+	0	0	439I253M703I	R625	Paracoccus_denitrificans_strain_381_(NR_026456.1)						H	2359	253	97.6	+	0	0	528I253M750I	R624	Hydrotalea_sandarakina_strain_AF-51_(NR_109380.1)
H	10349	253	100	+	0	0	439I253M703I	R626	Paracoccus_denitrificans_strain_381_(NR_026456.1)						H	2359	253	97.6	+	0	0	528I253M750I	R626	Hydrotalea_sandarakina_strain_AF-51_(NR_109380.1)
H	10349	253	100	+	0	0	439I253M703I	R628	Paracoccus_denitrificans_strain_381_(NR_026456.1)						H	2359	253	97.6	+	0	0	528I253M750I	R627	Hydrotalea_sandarakina_strain_AF-51_(NR_109380.1)
H	10349	253	100	+	0	0	439I253M703I	R627	Paracoccus_denitrificans_strain_381_(NR_026456.1)						H	2359	253	97.6	+	0	0	528I253M750I	R629	Hydrotalea_sandarakina_strain_AF-51_(NR_109380.1)
H	10349	253	100	+	0	0	439I253M703I	R629	Paracoccus_denitrificans_strain_381_(NR_026456.1)						H	2359	253	97.6	+	0	0	528I253M750I	R630	Hydrotalea_sandarakina_strain_AF-51_(NR_109380.1)
H	10349	253	100	+	0	0	439I253M703I	R631	Paracoccus_denitrificans_strain_381_(NR_026456.1)						H	2359	253	97.6	+	0	0	528I253M750I	R628	Hydrotalea_sandarakina_strain_AF-51_(NR_109380.1)
H	10349	253	100	+	0	0	439I253M703I	R632	Paracoccus_denitrificans_strain_381_(NR_026456.1)						H	2359	253	97.6	+	0	0	528I253M750I	R632	Hydrotalea_sandarakina_strain_AF-51_(NR_109380.1)
H	10349	253	100	+	0	0	439I253M703I	R633	Paracoccus_denitrificans_strain_381_(NR_026456.1)						H	2359	253	97.6	+	0	0	528I253M750I	R631	Hydrotalea_sandarakina_strain_AF-51_(NR_109380.1)
H	10349	253	100	+	0	0	439I253M703I	R630	Paracoccus_denitrificans_strain_381_(NR_026456.1)						H	2359	253	97.6	+	0	0	528I253M750I	R634	Hydrotalea_sandarakina_strain_AF-51_(NR_109380.1)
H	10349	253	100	+	0	0	439I253M703I	R634	Paracoccus_denitrificans_strain_381_(NR_026456.1)						H	2359	253	97.6	+	0	0	528I253M750I	R633	Hydrotalea_sandarakina_strain_AF-51_(NR_109380.1)
H	10349	253	100	+	0	0	439I253M703I	R635	Paracoccus_denitrificans_strain_381_(NR_026456.1)						H	2359	253	97.6	+	0	0	528I253M750I	R635	Hydrotalea_sandarakina_strain_AF-51_(NR_109380.1)
H	10349	253	100	+	0	0	439I253M703I	R636	Paracoccus_denitrificans_strain_381_(NR_026456.1)						H	2359	253	97.6	+	0	0	528I253M750I	R636	Hydrotalea_sandarakina_strain_AF-51_(NR_109380.1)
H	10349	253	100	+	0	0	439I253M703I	R637	Paracoccus_denitrificans_strain_381_(NR_026456.1)						H	2359	253	97.6	+	0	0	528I253M750I	R638	Hydrotalea_sandarakina_strain_AF-51_(NR_109380.1)
H	10349	253	100	+	0	0	439I253M703I	R638	Paracoccus_denitrificans_strain_381_(NR_026456.1)						H	2359	253	97.6	+	0	0	528I253M750I	R637	Hydrotalea_sandarakina_strain_AF-51_(NR_109380.1)
H	10349	253	100	+	0	0	439I253M703I	R639	Paracoccus_denitrificans_strain_381_(NR_026456.1)						H	2359	253	97.6	+	0	0	528I253M750I	R639	Hydrotalea_sandarakina_strain_AF-51_(NR_109380.1)
H	10349	253	100	+	0	0	439I253M703I	R640	Paracoccus_denitrificans_strain_381_(NR_026456.1)						H	2359	253	97.6	+	0	0	528I253M750I	R640	Hydrotalea_sandarakina_strain_AF-51_(NR_109380.1)
H	10349	253	100	+	0	0	439I253M703I	R641	Paracoccus_denitrificans_strain_381_(NR_026456.1)						H	2359	253	97.6	+	0	0	528I253M750I	R641	Hydrotalea_sandarakina_strain_AF-51_(NR_109380.1)
H	10349	253	100	+	0	0	439I253M703I	R642	Paracoccus_denitrificans_strain_381_(NR_026456.1)						H	2359	253	97.6	+	0	0	528I253M750I	R642	Hydrotalea_sandarakina_strain_AF-51_(NR_109380.1)
H	10349	253	100	+	0	0	439I253M703I	R644	Paracoccus_denitrificans_strain_381_(NR_026456.1)						H	2359	253	97.6	+	0	0	528I253M750I	R643	Hydrotalea_sandarakina_strain_AF-51_(NR_109380.1)
H	10349	253	100	+	0	0	439I253M703I	R643	Paracoccus_denitrificans_strain_381_(NR_026456.1)						H	2359	253	97.6	+	0	0	528I253M750I	R644	Hydrotalea_sandarakina_strain_AF-51_(NR_109380.1)
H	10349	253	100	+	0	0	439I253M703I	R645	Paracoccus_denitrificans_strain_381_(NR_026456.1)						H	2359	253	97.6	+	0	0	528I253M750I	R645	Hydrotalea_sandarakina_strain_AF-51_(NR_109380.1)
H	10349	253	100	+	0	0	439I253M703I	R646	Paracoccus_denitrificans_strain_381_(NR_026456.1)						H	2359	253	97.6	+	0	0	528I253M750I	R646	Hydrotalea_sandarakina_strain_AF-51_(NR_109380.1)
H	10349	253	100	+	0	0	439I253M703I	R648	Paracoccus_denitrificans_strain_381_(NR_026456.1)						H	2359	253	97.6	+	0	0	528I253M750I	R647	Hydrotalea_sandarakina_strain_AF-51_(NR_109380.1)
H	10349	253	100	+	0	0	439I253M703I	R649	Paracoccus_denitrificans_strain_381_(NR_026456.1)						H	2359	253	97.6	+	0	0	528I253M750I	R648	Hydrotalea_sandarakina_strain_AF-51_(NR_109380.1)
H	10349	253	100	+	0	0	439I253M703I	R650	Paracoccus_denitrificans_strain_381_(NR_026456.1)						H	2359	253	97.6	+	0	0	528I253M750I	R649	Hydrotalea_sandarakina_strain_AF-51_(NR_109380.1)
H	10349	253	100	+	0	0	439I253M703I	R647	Paracoccus_denitrificans_strain_381_(NR_026456.1)						H	2359	253	97.6	+	0	0	528I253M750I	R650	Hydrotalea_sandarakina_strain_AF-51_(NR_109380.1)
H	10349	253	100	+	0	0	439I253M703I	R651	Paracoccus_denitrificans_strain_381_(NR_026456.1)						H	2359	253	97.6	+	0	0	528I253M750I	R651	Hydrotalea_sandarakina_strain_AF-51_(NR_109380.1)
H	10349	253	100	+	0	0	439I253M703I	R652	Paracoccus_denitrificans_strain_381_(NR_026456.1)						H	2359	253	97.6	+	0	0	528I253M750I	R653	Hydrotalea_sandarakina_strain_AF-51_(NR_109380.1)
H	10349	253	100	+	0	0	439I253M703I	R653	Paracoccus_denitrificans_strain_381_(NR_026456.1)						H	2359	253	97.6	+	0	0	528I253M750I	R654	Hydrotalea_sandarakina_strain_AF-51_(NR_109380.1)
H	10349	253	100	+	0	0	439I253M703I	R654	Paracoccus_denitrificans_strain_381_(NR_026456.1)						H	2359	253	97.6	+	0	0	528I253M750I	R652	Hydrotalea_sandarakina_strain_AF-51_(NR_109380.1)
H	10349	253	100	+	0	0	439I253M703I	R655	Paracoccus_denitrificans_strain_381_(NR_026456.1)						H	2359	253	97.6	+	0	0	528I253M750I	R655	Hydrotalea_sandarakina_strain_AF-51_(NR_109380.1)
H	10349	253	100	+	0	0	439I253M703I	R656	Paracoccus_denitrificans_strain_381_(NR_026456.1)						H	2359	253	97.6	+	0	0	528I253M750I	R656	Hydrotalea_sandarakina_strain_AF-51_(NR_109380.1)
H	10349	253	100	+	0	0	439I253M703I	R657	Paracoccus_denitrificans_strain_381_(NR_026456.1)						H	2359	253	97.6	+	0	0	528I253M750I	R657	Hydrotalea_sandarakina_strain_AF-51_(NR_109380.1)
H	10349	253	100	+	0	0	439I253M703I	R658	Paracoccus_denitrificans_strain_381_(NR_026456.1)						H	2359	253	97.6	+	0	0	528I253M750I	R658	Hydrotalea_sandarakina_strain_AF-51_(NR_109380.1)
H	10349	253	100	+	0	0	439I253M703I	R659	Paracoccus_denitrificans_strain_381_(NR_026456.1)						H	2359	253	97.6	+	0	0	528I253M750I	R659	Hydrotalea_sandarakina_strain_AF-51_(NR_109380.1)
H	4855	253	99.6	+	0	0	542I253M755I	R660	Exiguobacterium_acetylicum_strain_DSM_20416_(NR_043479.1)						H	2359	253	97.6	+	0	0	528I253M750I	R660	Hydrotalea_sandarakina_strain_AF-51_(NR_109380.1)
H	4855	253	99.6	+	0	0	542I253M755I	R661	Exiguobacterium_acetylicum_strain_DSM_20416_(NR_043479.1)						H	2359	253	97.6	+	0	0	528I253M750I	R661	Hydrotalea_sandarakina_strain_AF-51_(NR_109380.1)
H	4855	253	99.6	+	0	0	542I253M755I	R663	Exiguobacterium_acetylicum_strain_DSM_20416_(NR_043479.1)						H	2359	253	97.6	+	0	0	528I253M750I	R662	Hydrotalea_sandarakina_strain_AF-51_(NR_109380.1)
H	4855	253	99.6	+	0	0	542I253M755I	R662	Exiguobacterium_acetylicum_strain_DSM_20416_(NR_043479.1)						H	2359	253	97.6	+	0	0	528I253M750I	R663	Hydrotalea_sandarakina_strain_AF-51_(NR_109380.1)
H	4855	253	99.6	+	0	0	542I253M755I	R664	Exiguobacterium_acetylicum_strain_DSM_20416_(NR_043479.1)						H	2359	253	97.6	+	0	0	528I253M750I	R664	Hydrotalea_sandarakina_strain_AF-51_(NR_109380.1)
H	4855	253	99.6	+	0	0	542I253M755I	R666	Exiguobacterium_acetylicum_strain_DSM_20416_(NR_043479.1)						H	2359	253	97.6	+	0	0	528I253M750I	R665	Hydrotalea_sandarakina_strain_AF-51_(NR_109380.1)
H	4855	253	99.6	+	0	0	542I253M755I	R667	Exiguobacterium_acetylicum_strain_DSM_20416_(NR_043479.1)						H	2359	253	97.6	+	0	0	528I253M750I	R666	Hydrotalea_sandarakina_strain_AF-51_(NR_109380.1)
H	4855	253	99.6	+	0	0	542I253M755I	R665	Exiguobacterium_acetylicum_strain_DSM_20416_(NR_043479.1)						H	2359	253	97.6	+	0	0	528I253M750I	R667	Hydrotalea_sandarakina_strain_AF-51_(NR_109380.1)
H	4855	253	99.6	+	0	0	542I253M755I	R668	Exiguobacterium_acetylicum_strain_DSM_20416_(NR_043479.1)						H	2359	253	97.6	+	0	0	528I253M750I	R669	Hydrotalea_sandarakina_strain_AF-51_(NR_109380.1)
H	4855	253	99.6	+	0	0	542I253M755I	R669	Exiguobacterium_acetylicum_strain_DSM_20416_(NR_043479.1)						H	2359	253	97.6	+	0	0	528I253M750I	R670	Hydrotalea_sandarakina_strain_AF-51_(NR_109380.1)
H	4855	253	99.6	+	0	0	542I253M755I	R670	Exiguobacterium_acetylicum_strain_DSM_20416_(NR_043479.1)						H	2359	253	97.6	+	0	0	528I253M750I	R671	Hydrotalea_sandarakina_strain_AF-51_(NR_109380.1)
H	4855	253	99.6	+	0	0	542I253M755I	R672	Exiguobacterium_acetylicum_strain_DSM_20416_(NR_043479.1)						H	2359	253	97.6	+	0	0	528I253M750I	R672	Hydrotalea_sandarakina_strain_AF-51_(NR_109380.1)
H	4855	253	99.6	+	0	0	542I253M755I	R671	Exiguobacterium_acetylicum_strain_DSM_20416_(NR_043479.1)						H	2359	253	97.6	+	0	0	528I253M750I	R673	Hydrotalea_sandarakina_strain_AF-51_(NR_109380.1)
H	4855	253	99.6	+	0	0	542I253M755I	R673	Exiguobacterium_acetylicum_strain_DSM_20416_(NR_043479.1)						H	2359	253	97.6	+	0	0	528I253M750I	R674	Hydrotalea_sandarakina_strain_AF-51_(NR_109380.1)
H	4855	253	99.6	+	0	0	542I253M755I	R674	Exiguobacterium_acetylicum_strain_DSM_20416_(NR_043479.1)						H	2359	253	97.6	+	0	0	528I253M750I	R675	Hydrotalea_sandarakina_strain_AF-51_(NR_109380.1)
H	4855	253	99.6	+	0	0	542I253M755I	R675	Exiguobacterium_acetylicum_strain_DSM_20416_(NR_043479.1)						H	2359	253	97.6	+	0	0	528I253M750I	R677	Hydrotalea_sandarakina_strain_AF-51_(NR_109380.1)
H	4855	253	99.6	+	0	0	542I253M755I	R676	Exiguobacterium_acetylicum_strain_DSM_20416_(NR_043479.1)						H	2359	253	97.6	+	0	0	528I253M750I	R676	Hydrotalea_sandarakina_strain_AF-51_(NR_109380.1)
H	4855	253	99.6	+	0	0	542I253M755I	R677	Exiguobacterium_acetylicum_strain_DSM_20416_(NR_043479.1)						H	2359	253	97.6	+	0	0	528I253M750I	R678	Hydrotalea_sandarakina_strain_AF-51_(NR_109380.1)
H	4855	253	99.6	+	0	0	542I253M755I	R678	Exiguobacterium_acetylicum_strain_DSM_20416_(NR_043479.1)						H	2359	253	97.6	+	0	0	528I253M750I	R679	Hydrotalea_sandarakina_strain_AF-51_(NR_109380.1)
H	4855	253	99.6	+	0	0	542I253M755I	R679	Exiguobacterium_acetylicum_strain_DSM_20416_(NR_043479.1)						H	2359	253	97.6	+	0	0	528I253M750I	R680	Hydrotalea_sandarakina_strain_AF-51_(NR_109380.1)
H	4855	253	99.6	+	0	0	542I253M755I	R680	Exiguobacterium_acetylicum_strain_DSM_20416_(NR_043479.1)						H	2359	253	97.6	+	0	0	528I253M750I	R681	Hydrotalea_sandarakina_strain_AF-51_(NR_109380.1)
H	4855	253	99.6	+	0	0	542I253M755I	R681	Exiguobacterium_acetylicum_strain_DSM_20416_(NR_043479.1)						H	2359	253	97.6	+	0	0	528I253M750I	R682	Hydrotalea_sandarakina_strain_AF-51_(NR_109380.1)
H	4855	253	99.6	+	0	0	542I253M755I	R682	Exiguobacterium_acetylicum_strain_DSM_20416_(NR_043479.1)						H	2359	253	97.6	+	0	0	528I253M750I	R683	Hydrotalea_sandarakina_strain_AF-51_(NR_109380.1)
H	4855	253	99.6	+	0	0	542I253M755I	R683	Exiguobacterium_acetylicum_strain_DSM_20416_(NR_043479.1)						H	2359	253	97.6	+	0	0	528I253M750I	R668	Hydrotalea_sandarakina_strain_AF-51_(NR_109380.1)
H	4855	253	99.6	+	0	0	542I253M755I	R684	Exiguobacterium_acetylicum_strain_DSM_20416_(NR_043479.1)						H	2359	253	97.6	+	0	0	528I253M750I	R684	Hydrotalea_sandarakina_strain_AF-51_(NR_109380.1)
H	4855	253	99.6	+	0	0	542I253M755I	R685	Exiguobacterium_acetylicum_strain_DSM_20416_(NR_043479.1)						H	2359	253	97.6	+	0	0	528I253M750I	R685	Hydrotalea_sandarakina_strain_AF-51_(NR_109380.1)
H	4855	253	99.6	+	0	0	542I253M755I	R686	Exiguobacterium_acetylicum_strain_DSM_20416_(NR_043479.1)						H	2359	253	97.6	+	0	0	528I253M750I	R686	Hydrotalea_sandarakina_strain_AF-51_(NR_109380.1)
H	4855	253	99.6	+	0	0	542I253M755I	R687	Exiguobacterium_acetylicum_strain_DSM_20416_(NR_043479.1)						H	2359	253	97.6	+	0	0	528I253M750I	R687	Hydrotalea_sandarakina_strain_AF-51_(NR_109380.1)
H	4855	253	99.6	+	0	0	542I253M755I	R689	Exiguobacterium_acetylicum_strain_DSM_20416_(NR_043479.1)						H	2359	253	97.6	+	0	0	528I253M750I	R688	Hydrotalea_sandarakina_strain_AF-51_(NR_109380.1)
H	4855	253	99.6	+	0	0	542I253M755I	R688	Exiguobacterium_acetylicum_strain_DSM_20416_(NR_043479.1)						H	2359	253	97.6	+	0	0	528I253M750I	R689	Hydrotalea_sandarakina_strain_AF-51_(NR_109380.1)
H	2359	253	100	+	0	0	528I253M750I	R690	Hydrotalea_sandarakina_strain_AF-51_(NR_109380.1)						H	2359	253	97.6	+	0	0	528I253M750I	R690	Hydrotalea_sandarakina_strain_AF-51_(NR_109380.1)
H	2359	253	100	+	0	0	528I253M750I	R691	Hydrotalea_sandarakina_strain_AF-51_(NR_109380.1)						H	2359	253	97.6	+	0	0	528I253M750I	R691	Hydrotalea_sandarakina_strain_AF-51_(NR_109380.1)
H	2359	253	100	+	0	0	528I253M750I	R693	Hydrotalea_sandarakina_strain_AF-51_(NR_109380.1)						H	2359	253	97.6	+	0	0	528I253M750I	R692	Hydrotalea_sandarakina_strain_AF-51_(NR_109380.1)
H	2359	253	100	+	0	0	528I253M750I	R694	Hydrotalea_sandarakina_strain_AF-51_(NR_109380.1)						H	2359	253	97.6	+	0	0	528I253M750I	R693	Hydrotalea_sandarakina_strain_AF-51_(NR_109380.1)
H	2359	253	100	+	0	0	528I253M750I	R695	Hydrotalea_sandarakina_strain_AF-51_(NR_109380.1)						H	2359	253	97.6	+	0	0	528I253M750I	R694	Hydrotalea_sandarakina_strain_AF-51_(NR_109380.1)
H	2359	253	100	+	0	0	528I253M750I	R692	Hydrotalea_sandarakina_strain_AF-51_(NR_109380.1)						H	2359	253	97.6	+	0	0	528I253M750I	R696	Hydrotalea_sandarakina_strain_AF-51_(NR_109380.1)
H	2359	253	100	+	0	0	528I253M750I	R697	Hydrotalea_sandarakina_strain_AF-51_(NR_109380.1)						H	2359	253	97.6	+	0	0	528I253M750I	R697	Hydrotalea_sandarakina_strain_AF-51_(NR_109380.1)
H	2359	253	100	+	0	0	528I253M750I	R698	Hydrotalea_sandarakina_strain_AF-51_(NR_109380.1)						H	2359	253	97.6	+	0	0	528I253M750I	R698	Hydrotalea_sandarakina_strain_AF-51_(NR_109380.1)
H	2359	253	100	+	0	0	528I253M750I	R696	Hydrotalea_sandarakina_strain_AF-51_(NR_109380.1)						H	2359	253	97.6	+	0	0	528I253M750I	R695	Hydrotalea_sandarakina_strain_AF-51_(NR_109380.1)
H	2359	253	100	+	0	0	528I253M750I	R699	Hydrotalea_sandarakina_strain_AF-51_(NR_109380.1)						H	2359	253	97.6	+	0	0	528I253M750I	R700	Hydrotalea_sandarakina_strain_AF-51_(NR_109380.1)
H	2359	253	100	+	0	0	528I253M750I	R700	Hydrotalea_sandarakina_strain_AF-51_(NR_109380.1)						H	2359	253	97.6	+	0	0	528I253M750I	R699	Hydrotalea_sandarakina_strain_AF-51_(NR_109380.1)
H	2359	253	100	+	0	0	528I253M750I	R703	Hydrotalea_sandarakina_strain_AF-51_(NR_109380.1)						H	2359	253	97.6	+	0	0	528I253M750I	R701	Hydrotalea_sandarakina_strain_AF-51_(NR_109380.1)
H	2359	253	100	+	0	0	528I253M750I	R701	Hydrotalea_sandarakina_strain_AF-51_(NR_109380.1)						H	2359	253	97.6	+	0	0	528I253M750I	R702	Hydrotalea_sandarakina_strain_AF-51_(NR_109380.1)
H	2359	253	100	+	0	0	528I253M750I	R702	Hydrotalea_sandarakina_strain_AF-51_(NR_109380.1)						H	2359	253	97.6	+	0	0	528I253M750I	R703	Hydrotalea_sandarakina_strain_AF-51_(NR_109380.1)
H	2359	253	100	+	0	0	528I253M750I	R704	Hydrotalea_sandarakina_strain_AF-51_(NR_109380.1)						H	2359	253	97.6	+	0	0	528I253M750I	R704	Hydrotalea_sandarakina_strain_AF-51_(NR_109380.1)
H	2359	253	100	+	0	0	528I253M750I	R705	Hydrotalea_sandarakina_strain_AF-51_(NR_109380.1)						H	2359	253	97.6	+	0	0	528I253M750I	R705	Hydrotalea_sandarakina_strain_AF-51_(NR_109380.1)
H	2359	253	100	+	0	0	528I253M750I	R706	Hydrotalea_sandarakina_strain_AF-51_(NR_109380.1)						H	2359	253	97.6	+	0	0	528I253M750I	R706	Hydrotalea_sandarakina_strain_AF-51_(NR_109380.1)
H	2359	253	100	+	0	0	528I253M750I	R707	Hydrotalea_sandarakina_strain_AF-51_(NR_109380.1)						H	2359	253	97.6	+	0	0	528I253M750I	R707	Hydrotalea_sandarakina_strain_AF-51_(NR_109380.1)
H	2359	253	100	+	0	0	528I253M750I	R708	Hydrotalea_sandarakina_strain_AF-51_(NR_109380.1)						H	2359	253	97.6	+	0	0	528I253M750I	R708	Hydrotalea_sandarakina_strain_AF-51_(NR_109380.1)
H	2359	253	100	+	0	0	528I253M750I	R709	Hydrotalea_sandarakina_strain_AF-51_(NR_109380.1)						H	2359	253	97.6	+	0	0	528I253M750I	R709	Hydrotalea_sandarakina_strain_AF-51_(NR_109380.1)
H	2359	253	100	+	0	0	528I253M750I	R710	Hydrotalea_sandarakina_strain_AF-51_(NR_109380.1)						H	2359	253	97.6	+	0	0	528I253M750I	R710	Hydrotalea_sandarakina_strain_AF-51_(NR_109380.1)
H	2359	253	100	+	0	0	528I253M750I	R711	Hydrotalea_sandarakina_strain_AF-51_(NR_109380.1)						H	2359	253	97.6	+	0	0	528I253M750I	R711	Hydrotalea_sandarakina_strain_AF-51_(NR_109380.1)
H	2359	253	100	+	0	0	528I253M750I	R712	Hydrotalea_sandarakina_strain_AF-51_(NR_109380.1)						H	2359	253	97.6	+	0	0	528I253M750I	R712	Hydrotalea_sandarakina_strain_AF-51_(NR_109380.1)
H	2359	253	100	+	0	0	528I253M750I	R714	Hydrotalea_sandarakina_strain_AF-51_(NR_109380.1)						H	2359	253	97.6	+	0	0	528I253M750I	R713	Hydrotalea_sandarakina_strain_AF-51_(NR_109380.1)
H	2359	253	100	+	0	0	528I253M750I	R713	Hydrotalea_sandarakina_strain_AF-51_(NR_109380.1)						H	2359	253	97.6	+	0	0	528I253M750I	R714	Hydrotalea_sandarakina_strain_AF-51_(NR_109380.1)
H	2359	253	100	+	0	0	528I253M750I	R715	Hydrotalea_sandarakina_strain_AF-51_(NR_109380.1)						H	2359	253	97.6	+	0	0	528I253M750I	R715	Hydrotalea_sandarakina_strain_AF-51_(NR_109380.1)
H	2359	253	100	+	0	0	528I253M750I	R716	Hydrotalea_sandarakina_strain_AF-51_(NR_109380.1)						H	2359	253	97.6	+	0	0	528I253M750I	R716	Hydrotalea_sandarakina_strain_AF-51_(NR_109380.1)
H	2359	253	100	+	0	0	528I253M750I	R717	Hydrotalea_sandarakina_strain_AF-51_(NR_109380.1)						H	2359	253	97.6	+	0	0	528I253M750I	R717	Hydrotalea_sandarakina_strain_AF-51_(NR_109380.1)
H	2359	253	100	+	0	0	528I253M750I	R719	Hydrotalea_sandarakina_strain_AF-51_(NR_109380.1)						H	2359	253	97.6	+	0	0	528I253M750I	R718	Hydrotalea_sandarakina_strain_AF-51_(NR_109380.1)
H	2359	253	100	+	0	0	528I253M750I	R720	Hydrotalea_sandarakina_strain_AF-51_(NR_109380.1)						H	2359	253	97.6	+	0	0	528I253M750I	R719	Hydrotalea_sandarakina_strain_AF-51_(NR_109380.1)
H	2359	253	100	+	0	0	528I253M750I	R718	Hydrotalea_sandarakina_strain_AF-51_(NR_109380.1)						H	2359	253	97.6	+	0	0	528I253M750I	R720	Hydrotalea_sandarakina_strain_AF-51_(NR_109380.1)
H	2359	253	100	+	0	0	528I253M750I	R721	Hydrotalea_sandarakina_strain_AF-51_(NR_109380.1)						H	2359	253	97.6	+	0	0	528I253M750I	R721	Hydrotalea_sandarakina_strain_AF-51_(NR_109380.1)
H	2359	253	100	+	0	0	528I253M750I	R722	Hydrotalea_sandarakina_strain_AF-51_(NR_109380.1)						H	2359	253	97.6	+	0	0	528I253M750I	R723	Hydrotalea_sandarakina_strain_AF-51_(NR_109380.1)
H	2359	253	100	+	0	0	528I253M750I	R723	Hydrotalea_sandarakina_strain_AF-51_(NR_109380.1)						H	2359	253	97.6	+	0	0	528I253M750I	R725	Hydrotalea_sandarakina_strain_AF-51_(NR_109380.1)
H	2359	253	100	+	0	0	528I253M750I	R724	Hydrotalea_sandarakina_strain_AF-51_(NR_109380.1)						H	2359	253	97.6	+	0	0	528I253M750I	R722	Hydrotalea_sandarakina_strain_AF-51_(NR_109380.1)
H	2359	253	100	+	0	0	528I253M750I	R725	Hydrotalea_sandarakina_strain_AF-51_(NR_109380.1)						H	2359	253	97.6	+	0	0	528I253M750I	R724	Hydrotalea_sandarakina_strain_AF-51_(NR_109380.1)
H	2359	253	100	+	0	0	528I253M750I	R726	Hydrotalea_sandarakina_strain_AF-51_(NR_109380.1)						H	2359	253	97.6	+	0	0	528I253M750I	R726	Hydrotalea_sandarakina_strain_AF-51_(NR_109380.1)
H	2359	253	100	+	0	0	528I253M750I	R727	Hydrotalea_sandarakina_strain_AF-51_(NR_109380.1)						H	2359	253	97.6	+	0	0	528I253M750I	R727	Hydrotalea_sandarakina_strain_AF-51_(NR_109380.1)
H	2359	253	100	+	0	0	528I253M750I	R728	Hydrotalea_sandarakina_strain_AF-51_(NR_109380.1)						H	2359	253	97.6	+	0	0	528I253M750I	R730	Hydrotalea_sandarakina_strain_AF-51_(NR_109380.1)
H	2359	253	100	+	0	0	528I253M750I	R729	Hydrotalea_sandarakina_strain_AF-51_(NR_109380.1)						H	2359	253	97.6	+	0	0	528I253M750I	R731	Hydrotalea_sandarakina_strain_AF-51_(NR_109380.1)
H	2359	253	100	+	0	0	528I253M750I	R730	Hydrotalea_sandarakina_strain_AF-51_(NR_109380.1)						H	2359	253	97.6	+	0	0	528I253M750I	R732	Hydrotalea_sandarakina_strain_AF-51_(NR_109380.1)
H	2359	253	100	+	0	0	528I253M750I	R731	Hydrotalea_sandarakina_strain_AF-51_(NR_109380.1)						H	2359	253	97.6	+	0	0	528I253M750I	R733	Hydrotalea_sandarakina_strain_AF-51_(NR_109380.1)
H	2359	253	100	+	0	0	528I253M750I	R732	Hydrotalea_sandarakina_strain_AF-51_(NR_109380.1)						H	2359	253	97.6	+	0	0	528I253M750I	R728	Hydrotalea_sandarakina_strain_AF-51_(NR_109380.1)
H	2359	253	100	+	0	0	528I253M750I	R733	Hydrotalea_sandarakina_strain_AF-51_(NR_109380.1)						H	2359	253	97.6	+	0	0	528I253M750I	R729	Hydrotalea_sandarakina_strain_AF-51_(NR_109380.1)
H	2359	253	100	+	0	0	528I253M750I	R734	Hydrotalea_sandarakina_strain_AF-51_(NR_109380.1)						H	2359	253	97.6	+	0	0	528I253M750I	R734	Hydrotalea_sandarakina_strain_AF-51_(NR_109380.1)
H	2359	253	100	+	0	0	528I253M750I	R735	Hydrotalea_sandarakina_strain_AF-51_(NR_109380.1)						H	2359	253	97.6	+	0	0	528I253M750I	R735	Hydrotalea_sandarakina_strain_AF-51_(NR_109380.1)
H	2359	253	100	+	0	0	528I253M750I	R736	Hydrotalea_sandarakina_strain_AF-51_(NR_109380.1)						H	2359	253	97.6	+	0	0	528I253M750I	R736	Hydrotalea_sandarakina_strain_AF-51_(NR_109380.1)
H	2359	253	100	+	0	0	528I253M750I	R737	Hydrotalea_sandarakina_strain_AF-51_(NR_109380.1)						H	2359	253	97.6	+	0	0	528I253M750I	R737	Hydrotalea_sandarakina_strain_AF-51_(NR_109380.1)
H	2359	253	100	+	0	0	528I253M750I	R738	Hydrotalea_sandarakina_strain_AF-51_(NR_109380.1)						H	2359	253	97.6	+	0	0	528I253M750I	R738	Hydrotalea_sandarakina_strain_AF-51_(NR_109380.1)
H	2359	253	100	+	0	0	528I253M750I	R739	Hydrotalea_sandarakina_strain_AF-51_(NR_109380.1)						H	2359	253	97.6	+	0	0	528I253M750I	R739	Hydrotalea_sandarakina_strain_AF-51_(NR_109380.1)
H	2359	253	100	+	0	0	528I253M750I	R740	Hydrotalea_sandarakina_strain_AF-51_(NR_109380.1)						H	2359	253	97.6	+	0	0	528I253M750I	R741	Hydrotalea_sandarakina_strain_AF-51_(NR_109380.1)
H	2359	253	100	+	0	0	528I253M750I	R742	Hydrotalea_sandarakina_strain_AF-51_(NR_109380.1)						H	2359	253	97.6	+	0	0	528I253M750I	R742	Hydrotalea_sandarakina_strain_AF-51_(NR_109380.1)
H	2359	253	100	+	0	0	528I253M750I	R743	Hydrotalea_sandarakina_strain_AF-51_(NR_109380.1)						H	2359	253	97.6	+	0	0	528I253M750I	R743	Hydrotalea_sandarakina_strain_AF-51_(NR_109380.1)
H	2359	253	100	+	0	0	528I253M750I	R744	Hydrotalea_sandarakina_strain_AF-51_(NR_109380.1)						H	2359	253	97.6	+	0	0	528I253M750I	R740	Hydrotalea_sandarakina_strain_AF-51_(NR_109380.1)
H	2359	253	100	+	0	0	528I253M750I	R741	Hydrotalea_sandarakina_strain_AF-51_(NR_109380.1)						H	2359	253	97.6	+	0	0	528I253M750I	R744	Hydrotalea_sandarakina_strain_AF-51_(NR_109380.1)
H	2359	253	100	+	0	0	528I253M750I	R745	Hydrotalea_sandarakina_strain_AF-51_(NR_109380.1)						H	2359	253	97.6	+	0	0	528I253M750I	R745	Hydrotalea_sandarakina_strain_AF-51_(NR_109380.1)
H	2359	253	100	+	0	0	528I253M750I	R746	Hydrotalea_sandarakina_strain_AF-51_(NR_109380.1)						H	2359	253	97.6	+	0	0	528I253M750I	R746	Hydrotalea_sandarakina_strain_AF-51_(NR_109380.1)
H	2359	253	100	+	0	0	528I253M750I	R747	Hydrotalea_sandarakina_strain_AF-51_(NR_109380.1)						H	2359	253	97.6	+	0	0	528I253M750I	R747	Hydrotalea_sandarakina_strain_AF-51_(NR_109380.1)
H	2359	253	100	+	0	0	528I253M750I	R748	Hydrotalea_sandarakina_strain_AF-51_(NR_109380.1)						H	2359	253	97.6	+	0	0	528I253M750I	R748	Hydrotalea_sandarakina_strain_AF-51_(NR_109380.1)
H	2359	253	100	+	0	0	528I253M750I	R750	Hydrotalea_sandarakina_strain_AF-51_(NR_109380.1)						H	2359	253	97.6	+	0	0	528I253M750I	R749	Hydrotalea_sandarakina_strain_AF-51_(NR_109380.1)
H	2359	253	100	+	0	0	528I253M750I	R751	Hydrotalea_sandarakina_strain_AF-51_(NR_109380.1)						H	2359	253	97.6	+	0	0	528I253M750I	R750	Hydrotalea_sandarakina_strain_AF-51_(NR_109380.1)
H	2359	253	100	+	0	0	528I253M750I	R752	Hydrotalea_sandarakina_strain_AF-51_(NR_109380.1)						H	2359	253	97.6	+	0	0	528I253M750I	R751	Hydrotalea_sandarakina_strain_AF-51_(NR_109380.1)
H	2359	253	100	+	0	0	528I253M750I	R754	Hydrotalea_sandarakina_strain_AF-51_(NR_109380.1)						H	2359	253	97.6	+	0	0	528I253M750I	R752	Hydrotalea_sandarakina_strain_AF-51_(NR_109380.1)
H	2359	253	100	+	0	0	528I253M750I	R753	Hydrotalea_sandarakina_strain_AF-51_(NR_109380.1)						H	2359	253	97.6	+	0	0	528I253M750I	R753	Hydrotalea_sandarakina_strain_AF-51_(NR_109380.1)
H	2359	253	100	+	0	0	528I253M750I	R755	Hydrotalea_sandarakina_strain_AF-51_(NR_109380.1)						H	2359	253	97.6	+	0	0	528I253M750I	R754	Hydrotalea_sandarakina_strain_AF-51_(NR_109380.1)
H	2359	253	100	+	0	0	528I253M750I	R749	Hydrotalea_sandarakina_strain_AF-51_(NR_109380.1)						H	2359	253	97.6	+	0	0	528I253M750I	R755	Hydrotalea_sandarakina_strain_AF-51_(NR_109380.1)
H	2359	253	100	+	0	0	528I253M750I	R756	Hydrotalea_sandarakina_strain_AF-51_(NR_109380.1)						H	2359	253	97.6	+	0	0	528I253M750I	R756	Hydrotalea_sandarakina_strain_AF-51_(NR_109380.1)
H	2359	253	100	+	0	0	528I253M750I	R757	Hydrotalea_sandarakina_strain_AF-51_(NR_109380.1)						H	2359	253	97.6	+	0	0	528I253M750I	R757	Hydrotalea_sandarakina_strain_AF-51_(NR_109380.1)
H	2359	253	100	+	0	0	528I253M750I	R758	Hydrotalea_sandarakina_strain_AF-51_(NR_109380.1)						H	2359	253	97.6	+	0	0	528I253M750I	R758	Hydrotalea_sandarakina_strain_AF-51_(NR_109380.1)
H	2359	253	100	+	0	0	528I253M750I	R759	Hydrotalea_sandarakina_strain_AF-51_(NR_109380.1)						H	2359	253	97.6	+	0	0	528I253M750I	R759	Hydrotalea_sandarakina_strain_AF-51_(NR_109380.1)
H	2359	253	100	+	0	0	528I253M750I	R760	Hydrotalea_sandarakina_strain_AF-51_(NR_109380.1)						H	2359	253	97.6	+	0	0	528I253M750I	R760	Hydrotalea_sandarakina_strain_AF-51_(NR_109380.1)
H	2359	253	100	+	0	0	528I253M750I	R761	Hydrotalea_sandarakina_strain_AF-51_(NR_109380.1)						H	2359	253	97.6	+	0	0	528I253M750I	R761	Hydrotalea_sandarakina_strain_AF-51_(NR_109380.1)
H	2359	253	100	+	0	0	528I253M750I	R762	Hydrotalea_sandarakina_strain_AF-51_(NR_109380.1)						H	2359	253	97.6	+	0	0	528I253M750I	R762	Hydrotalea_sandarakina_strain_AF-51_(NR_109380.1)
H	2359	253	100	+	0	0	528I253M750I	R765	Hydrotalea_sandarakina_strain_AF-51_(NR_109380.1)						H	2359	253	97.6	+	0	0	528I253M750I	R763	Hydrotalea_sandarakina_strain_AF-51_(NR_109380.1)
H	2359	253	100	+	0	0	528I253M750I	R766	Hydrotalea_sandarakina_strain_AF-51_(NR_109380.1)						H	2359	253	97.6	+	0	0	528I253M750I	R764	Hydrotalea_sandarakina_strain_AF-51_(NR_109380.1)
H	2359	253	100	+	0	0	528I253M750I	R763	Hydrotalea_sandarakina_strain_AF-51_(NR_109380.1)						H	2359	253	97.6	+	0	0	528I253M750I	R765	Hydrotalea_sandarakina_strain_AF-51_(NR_109380.1)
H	2359	253	100	+	0	0	528I253M750I	R768	Hydrotalea_sandarakina_strain_AF-51_(NR_109380.1)						H	2359	253	97.6	+	0	0	528I253M750I	R766	Hydrotalea_sandarakina_strain_AF-51_(NR_109380.1)
H	2359	253	100	+	0	0	528I253M750I	R767	Hydrotalea_sandarakina_strain_AF-51_(NR_109380.1)						H	2359	253	97.6	+	0	0	528I253M750I	R767	Hydrotalea_sandarakina_strain_AF-51_(NR_109380.1)
H	2359	253	100	+	0	0	528I253M750I	R769	Hydrotalea_sandarakina_strain_AF-51_(NR_109380.1)						H	2359	253	97.6	+	0	0	528I253M750I	R768	Hydrotalea_sandarakina_strain_AF-51_(NR_109380.1)
H	2359	253	100	+	0	0	528I253M750I	R764	Hydrotalea_sandarakina_strain_AF-51_(NR_109380.1)						H	2359	253	97.6	+	0	0	528I253M750I	R769	Hydrotalea_sandarakina_strain_AF-51_(NR_109380.1)
H	2359	253	100	+	0	0	528I253M750I	R772	Hydrotalea_sandarakina_strain_AF-51_(NR_109380.1)						H	2359	253	97.6	+	0	0	528I253M750I	R770	Hydrotalea_sandarakina_strain_AF-51_(NR_109380.1)
H	2359	253	100	+	0	0	528I253M750I	R771	Hydrotalea_sandarakina_strain_AF-51_(NR_109380.1)						H	2359	253	97.6	+	0	0	528I253M750I	R771	Hydrotalea_sandarakina_strain_AF-51_(NR_109380.1)
H	2359	253	100	+	0	0	528I253M750I	R773	Hydrotalea_sandarakina_strain_AF-51_(NR_109380.1)						H	2359	253	97.6	+	0	0	528I253M750I	R772	Hydrotalea_sandarakina_strain_AF-51_(NR_109380.1)
H	2359	253	100	+	0	0	528I253M750I	R775	Hydrotalea_sandarakina_strain_AF-51_(NR_109380.1)						H	2359	253	97.6	+	0	0	528I253M750I	R773	Hydrotalea_sandarakina_strain_AF-51_(NR_109380.1)
H	2359	253	100	+	0	0	528I253M750I	R774	Hydrotalea_sandarakina_strain_AF-51_(NR_109380.1)						H	2359	253	97.6	+	0	0	528I253M750I	R775	Hydrotalea_sandarakina_strain_AF-51_(NR_109380.1)
H	2359	253	100	+	0	0	528I253M750I	R776	Hydrotalea_sandarakina_strain_AF-51_(NR_109380.1)						H	2359	253	97.6	+	0	0	528I253M750I	R776	Hydrotalea_sandarakina_strain_AF-51_(NR_109380.1)
H	2359	253	100	+	0	0	528I253M750I	R778	Hydrotalea_sandarakina_strain_AF-51_(NR_109380.1)						H	2359	253	97.6	+	0	0	528I253M750I	R774	Hydrotalea_sandarakina_strain_AF-51_(NR_109380.1)
H	2359	253	100	+	0	0	528I253M750I	R777	Hydrotalea_sandarakina_strain_AF-51_(NR_109380.1)						H	2359	253	97.6	+	0	0	528I253M750I	R777	Hydrotalea_sandarakina_strain_AF-51_(NR_109380.1)
H	2359	253	100	+	0	0	528I253M750I	R779	Hydrotalea_sandarakina_strain_AF-51_(NR_109380.1)						H	2359	253	97.6	+	0	0	528I253M750I	R778	Hydrotalea_sandarakina_strain_AF-51_(NR_109380.1)
H	2359	253	100	+	0	0	528I253M750I	R780	Hydrotalea_sandarakina_strain_AF-51_(NR_109380.1)						H	2359	253	97.6	+	0	0	528I253M750I	R779	Hydrotalea_sandarakina_strain_AF-51_(NR_109380.1)
H	2359	253	100	+	0	0	528I253M750I	R781	Hydrotalea_sandarakina_strain_AF-51_(NR_109380.1)						H	2359	253	97.6	+	0	0	528I253M750I	R780	Hydrotalea_sandarakina_strain_AF-51_(NR_109380.1)
H	2359	253	100	+	0	0	528I253M750I	R783	Hydrotalea_sandarakina_strain_AF-51_(NR_109380.1)						H	2359	253	97.6	+	0	0	528I253M750I	R781	Hydrotalea_sandarakina_strain_AF-51_(NR_109380.1)
H	2359	253	100	+	0	0	528I253M750I	R784	Hydrotalea_sandarakina_strain_AF-51_(NR_109380.1)						H	2359	253	97.6	+	0	0	528I253M750I	R782	Hydrotalea_sandarakina_strain_AF-51_(NR_109380.1)
H	2359	253	100	+	0	0	528I253M750I	R782	Hydrotalea_sandarakina_strain_AF-51_(NR_109380.1)						H	2359	253	97.6	+	0	0	528I253M750I	R784	Hydrotalea_sandarakina_strain_AF-51_(NR_109380.1)
H	2359	253	100	+	0	0	528I253M750I	R785	Hydrotalea_sandarakina_strain_AF-51_(NR_109380.1)						H	2359	253	97.6	+	0	0	528I253M750I	R785	Hydrotalea_sandarakina_strain_AF-51_(NR_109380.1)
H	2359	253	100	+	0	0	528I253M750I	R786	Hydrotalea_sandarakina_strain_AF-51_(NR_109380.1)						H	2359	253	97.6	+	0	0	528I253M750I	R786	Hydrotalea_sandarakina_strain_AF-51_(NR_109380.1)
H	2359	253	100	+	0	0	528I253M750I	R787	Hydrotalea_sandarakina_strain_AF-51_(NR_109380.1)						H	2359	253	97.6	+	0	0	528I253M750I	R783	Hydrotalea_sandarakina_strain_AF-51_(NR_109380.1)
H	2359	253	100	+	0	0	528I253M750I	R788	Hydrotalea_sandarakina_strain_AF-51_(NR_109380.1)						H	2359	253	97.6	+	0	0	528I253M750I	R788	Hydrotalea_sandarakina_strain_AF-51_(NR_109380.1)
H	2359	253	100	+	0	0	528I253M750I	R789	Hydrotalea_sandarakina_strain_AF-51_(NR_109380.1)						H	2359	253	97.6	+	0	0	528I253M750I	R787	Hydrotalea_sandarakina_strain_AF-51_(NR_109380.1)
H	2359	253	100	+	0	0	528I253M750I	R790	Hydrotalea_sandarakina_strain_AF-51_(NR_109380.1)						H	2359	253	97.6	+	0	0	528I253M750I	R789	Hydrotalea_sandarakina_strain_AF-51_(NR_109380.1)
H	2359	253	100	+	0	0	528I253M750I	R792	Hydrotalea_sandarakina_strain_AF-51_(NR_109380.1)						H	2359	253	97.6	+	0	0	528I253M750I	R790	Hydrotalea_sandarakina_strain_AF-51_(NR_109380.1)
H	2359	253	100	+	0	0	528I253M750I	R791	Hydrotalea_sandarakina_strain_AF-51_(NR_109380.1)						H	2359	253	97.6	+	0	0	528I253M750I	R791	Hydrotalea_sandarakina_strain_AF-51_(NR_109380.1)
H	2359	253	100	+	0	0	528I253M750I	R793	Hydrotalea_sandarakina_strain_AF-51_(NR_109380.1)						H	2359	253	97.6	+	0	0	528I253M750I	R792	Hydrotalea_sandarakina_strain_AF-51_(NR_109380.1)
H	2359	253	100	+	0	0	528I253M750I	R794	Hydrotalea_sandarakina_strain_AF-51_(NR_109380.1)						H	2359	253	97.6	+	0	0	528I253M750I	R793	Hydrotalea_sandarakina_strain_AF-51_(NR_109380.1)
H	2359	253	100	+	0	0	528I253M750I	R770	Hydrotalea_sandarakina_strain_AF-51_(NR_109380.1)						H	2359	253	97.6	+	0	0	528I253M750I	R794	Hydrotalea_sandarakina_strain_AF-51_(NR_109380.1)
H	2359	253	100	+	0	0	528I253M750I	R796	Hydrotalea_sandarakina_strain_AF-51_(NR_109380.1)						H	2359	253	97.6	+	0	0	528I253M750I	R795	Hydrotalea_sandarakina_strain_AF-51_(NR_109380.1)
H	2359	253	100	+	0	0	528I253M750I	R797	Hydrotalea_sandarakina_strain_AF-51_(NR_109380.1)						H	2359	253	97.6	+	0	0	528I253M750I	R796	Hydrotalea_sandarakina_strain_AF-51_(NR_109380.1)
H	2359	253	100	+	0	0	528I253M750I	R798	Hydrotalea_sandarakina_strain_AF-51_(NR_109380.1)						H	2359	253	97.6	+	0	0	528I253M750I	R797	Hydrotalea_sandarakina_strain_AF-51_(NR_109380.1)
H	2359	253	100	+	0	0	528I253M750I	R799	Hydrotalea_sandarakina_strain_AF-51_(NR_109380.1)						H	2359	253	97.6	+	0	0	528I253M750I	R798	Hydrotalea_sandarakina_strain_AF-51_(NR_109380.1)
H	2359	253	100	+	0	0	528I253M750I	R801	Hydrotalea_sandarakina_strain_AF-51_(NR_109380.1)						H	2359	253	97.6	+	0	0	528I253M750I	R799	Hydrotalea_sandarakina_strain_AF-51_(NR_109380.1)
H	2359	253	100	+	0	0	528I253M750I	R802	Hydrotalea_sandarakina_strain_AF-51_(NR_109380.1)						H	2359	253	97.6	+	0	0	528I253M750I	R800	Hydrotalea_sandarakina_strain_AF-51_(NR_109380.1)
H	2359	253	100	+	0	0	528I253M750I	R795	Hydrotalea_sandarakina_strain_AF-51_(NR_109380.1)						H	2359	253	97.6	+	0	0	528I253M750I	R801	Hydrotalea_sandarakina_strain_AF-51_(NR_109380.1)
H	2359	253	100	+	0	0	528I253M750I	R803	Hydrotalea_sandarakina_strain_AF-51_(NR_109380.1)						H	2359	253	97.6	+	0	0	528I253M750I	R802	Hydrotalea_sandarakina_strain_AF-51_(NR_109380.1)
H	2359	253	100	+	0	0	528I253M750I	R804	Hydrotalea_sandarakina_strain_AF-51_(NR_109380.1)						H	2359	253	97.6	+	0	0	528I253M750I	R803	Hydrotalea_sandarakina_strain_AF-51_(NR_109380.1)
H	2359	253	100	+	0	0	528I253M750I	R800	Hydrotalea_sandarakina_strain_AF-51_(NR_109380.1)						H	2359	253	97.6	+	0	0	528I253M750I	R804	Hydrotalea_sandarakina_strain_AF-51_(NR_109380.1)
H	2359	253	100	+	0	0	528I253M750I	R805	Hydrotalea_sandarakina_strain_AF-51_(NR_109380.1)						H	2359	253	97.6	+	0	0	528I253M750I	R806	Hydrotalea_sandarakina_strain_AF-51_(NR_109380.1)
H	2359	253	100	+	0	0	528I253M750I	R806	Hydrotalea_sandarakina_strain_AF-51_(NR_109380.1)						H	2359	253	97.6	+	0	0	528I253M750I	R805	Hydrotalea_sandarakina_strain_AF-51_(NR_109380.1)
H	2359	253	100	+	0	0	528I253M750I	R808	Hydrotalea_sandarakina_strain_AF-51_(NR_109380.1)						H	2359	253	97.6	+	0	0	528I253M750I	R807	Hydrotalea_sandarakina_strain_AF-51_(NR_109380.1)
H	2359	253	100	+	0	0	528I253M750I	R807	Hydrotalea_sandarakina_strain_AF-51_(NR_109380.1)						H	2359	253	97.6	+	0	0	528I253M750I	R808	Hydrotalea_sandarakina_strain_AF-51_(NR_109380.1)
H	2359	253	100	+	0	0	528I253M750I	R809	Hydrotalea_sandarakina_strain_AF-51_(NR_109380.1)						H	2359	253	97.6	+	0	0	528I253M750I	R809	Hydrotalea_sandarakina_strain_AF-51_(NR_109380.1)
H	2359	253	100	+	0	0	528I253M750I	R811	Hydrotalea_sandarakina_strain_AF-51_(NR_109380.1)						H	2359	253	97.6	+	0	0	528I253M750I	R810	Hydrotalea_sandarakina_strain_AF-51_(NR_109380.1)
H	2359	253	100	+	0	0	528I253M750I	R812	Hydrotalea_sandarakina_strain_AF-51_(NR_109380.1)						H	2359	253	97.6	+	0	0	528I253M750I	R811	Hydrotalea_sandarakina_strain_AF-51_(NR_109380.1)
H	2359	253	100	+	0	0	528I253M750I	R810	Hydrotalea_sandarakina_strain_AF-51_(NR_109380.1)						H	2359	253	97.6	+	0	0	528I253M750I	R813	Hydrotalea_sandarakina_strain_AF-51_(NR_109380.1)
H	2359	253	100	+	0	0	528I253M750I	R813	Hydrotalea_sandarakina_strain_AF-51_(NR_109380.1)						H	2359	253	97.6	+	0	0	528I253M750I	R812	Hydrotalea_sandarakina_strain_AF-51_(NR_109380.1)
H	2359	253	100	+	0	0	528I253M750I	R814	Hydrotalea_sandarakina_strain_AF-51_(NR_109380.1)						H	2359	253	97.6	+	0	0	528I253M750I	R814	Hydrotalea_sandarakina_strain_AF-51_(NR_109380.1)
H	2359	253	100	+	0	0	528I253M750I	R815	Hydrotalea_sandarakina_strain_AF-51_(NR_109380.1)						H	2359	253	97.6	+	0	0	528I253M750I	R815	Hydrotalea_sandarakina_strain_AF-51_(NR_109380.1)
H	2359	253	100	+	0	0	528I253M750I	R816	Hydrotalea_sandarakina_strain_AF-51_(NR_109380.1)						H	2359	253	97.6	+	0	0	528I253M750I	R816	Hydrotalea_sandarakina_strain_AF-51_(NR_109380.1)
H	2359	253	100	+	0	0	528I253M750I	R817	Hydrotalea_sandarakina_strain_AF-51_(NR_109380.1)						H	2359	253	97.6	+	0	0	528I253M750I	R817	Hydrotalea_sandarakina_strain_AF-51_(NR_109380.1)
H	2359	253	100	+	0	0	528I253M750I	R818	Hydrotalea_sandarakina_strain_AF-51_(NR_109380.1)						H	2359	253	97.6	+	0	0	528I253M750I	R818	Hydrotalea_sandarakina_strain_AF-51_(NR_109380.1)
H	2359	253	100	+	0	0	528I253M750I	R820	Hydrotalea_sandarakina_strain_AF-51_(NR_109380.1)						H	2359	253	97.6	+	0	0	528I253M750I	R820	Hydrotalea_sandarakina_strain_AF-51_(NR_109380.1)
H	2359	253	100	+	0	0	528I253M750I	R821	Hydrotalea_sandarakina_strain_AF-51_(NR_109380.1)						H	2359	253	97.6	+	0	0	528I253M750I	R819	Hydrotalea_sandarakina_strain_AF-51_(NR_109380.1)
H	2359	253	100	+	0	0	528I253M750I	R822	Hydrotalea_sandarakina_strain_AF-51_(NR_109380.1)						H	2359	253	97.6	+	0	0	528I253M750I	R822	Hydrotalea_sandarakina_strain_AF-51_(NR_109380.1)
H	2359	253	100	+	0	0	528I253M750I	R823	Hydrotalea_sandarakina_strain_AF-51_(NR_109380.1)						H	2359	253	97.6	+	0	0	528I253M750I	R821	Hydrotalea_sandarakina_strain_AF-51_(NR_109380.1)
H	2359	253	100	+	0	0	528I253M750I	R819	Hydrotalea_sandarakina_strain_AF-51_(NR_109380.1)						H	13206	253	99.6	+	0	0	518I253M719I	R824	Massilia_namucuonensis_strain_333-1-0411_(NR_118215.1)
H	2359	253	100	+	0	0	528I253M750I	R825	Hydrotalea_sandarakina_strain_AF-51_(NR_109380.1)						H	13206	253	99.6	+	0	0	518I253M719I	R823	Massilia_namucuonensis_strain_333-1-0411_(NR_118215.1)
H	2359	253	100	+	0	0	528I253M750I	R826	Hydrotalea_sandarakina_strain_AF-51_(NR_109380.1)						H	13206	253	99.6	+	0	0	518I253M719I	R825	Massilia_namucuonensis_strain_333-1-0411_(NR_118215.1)
H	2359	253	100	+	0	0	528I253M750I	R824	Hydrotalea_sandarakina_strain_AF-51_(NR_109380.1)						H	13206	253	99.6	+	0	0	518I253M719I	R826	Massilia_namucuonensis_strain_333-1-0411_(NR_118215.1)
H	2359	253	100	+	0	0	528I253M750I	R827	Hydrotalea_sandarakina_strain_AF-51_(NR_109380.1)						H	13206	253	99.6	+	0	0	518I253M719I	R828	Massilia_namucuonensis_strain_333-1-0411_(NR_118215.1)
H	2359	253	100	+	0	0	528I253M750I	R828	Hydrotalea_sandarakina_strain_AF-51_(NR_109380.1)						H	13206	253	99.6	+	0	0	518I253M719I	R827	Massilia_namucuonensis_strain_333-1-0411_(NR_118215.1)
H	2359	253	100	+	0	0	528I253M750I	R829	Hydrotalea_sandarakina_strain_AF-51_(NR_109380.1)						H	13206	253	99.6	+	0	0	518I253M719I	R829	Massilia_namucuonensis_strain_333-1-0411_(NR_118215.1)
H	2359	253	100	+	0	0	528I253M750I	R830	Hydrotalea_sandarakina_strain_AF-51_(NR_109380.1)						H	13206	253	99.6	+	0	0	518I253M719I	R830	Massilia_namucuonensis_strain_333-1-0411_(NR_118215.1)
H	2359	253	100	+	0	0	528I253M750I	R831	Hydrotalea_sandarakina_strain_AF-51_(NR_109380.1)						H	13206	253	99.6	+	0	0	518I253M719I	R832	Massilia_namucuonensis_strain_333-1-0411_(NR_118215.1)
H	2359	253	100	+	0	0	528I253M750I	R832	Hydrotalea_sandarakina_strain_AF-51_(NR_109380.1)						H	13206	253	99.6	+	0	0	518I253M719I	R831	Massilia_namucuonensis_strain_333-1-0411_(NR_118215.1)
H	2359	253	100	+	0	0	528I253M750I	R834	Hydrotalea_sandarakina_strain_AF-51_(NR_109380.1)						H	13206	253	99.6	+	0	0	518I253M719I	R833	Massilia_namucuonensis_strain_333-1-0411_(NR_118215.1)
H	2359	253	100	+	0	0	528I253M750I	R833	Hydrotalea_sandarakina_strain_AF-51_(NR_109380.1)						H	13206	253	99.6	+	0	0	518I253M719I	R834	Massilia_namucuonensis_strain_333-1-0411_(NR_118215.1)
H	2359	253	100	+	0	0	528I253M750I	R835	Hydrotalea_sandarakina_strain_AF-51_(NR_109380.1)						H	13206	253	99.6	+	0	0	518I253M719I	R835	Massilia_namucuonensis_strain_333-1-0411_(NR_118215.1)
H	2359	253	100	+	0	0	528I253M750I	R836	Hydrotalea_sandarakina_strain_AF-51_(NR_109380.1)						H	13206	253	99.6	+	0	0	518I253M719I	R837	Massilia_namucuonensis_strain_333-1-0411_(NR_118215.1)
H	2359	253	100	+	0	0	528I253M750I	R837	Hydrotalea_sandarakina_strain_AF-51_(NR_109380.1)						H	13206	253	99.6	+	0	0	518I253M719I	R838	Massilia_namucuonensis_strain_333-1-0411_(NR_118215.1)
H	2359	253	100	+	0	0	528I253M750I	R838	Hydrotalea_sandarakina_strain_AF-51_(NR_109380.1)						H	13206	253	99.6	+	0	0	518I253M719I	R839	Massilia_namucuonensis_strain_333-1-0411_(NR_118215.1)
H	2359	253	100	+	0	0	528I253M750I	R839	Hydrotalea_sandarakina_strain_AF-51_(NR_109380.1)						H	13206	253	99.6	+	0	0	518I253M719I	R841	Massilia_namucuonensis_strain_333-1-0411_(NR_118215.1)
H	2359	253	100	+	0	0	528I253M750I	R840	Hydrotalea_sandarakina_strain_AF-51_(NR_109380.1)						H	13206	253	99.6	+	0	0	518I253M719I	R840	Massilia_namucuonensis_strain_333-1-0411_(NR_118215.1)
H	2359	253	100	+	0	0	528I253M750I	R841	Hydrotalea_sandarakina_strain_AF-51_(NR_109380.1)						H	13206	253	99.6	+	0	0	518I253M719I	R836	Massilia_namucuonensis_strain_333-1-0411_(NR_118215.1)
H	2359	253	100	+	0	0	528I253M750I	R843	Hydrotalea_sandarakina_strain_AF-51_(NR_109380.1)						H	13206	253	99.6	+	0	0	518I253M719I	R842	Massilia_namucuonensis_strain_333-1-0411_(NR_118215.1)
H	2359	253	100	+	0	0	528I253M750I	R844	Hydrotalea_sandarakina_strain_AF-51_(NR_109380.1)						H	13206	253	99.6	+	0	0	518I253M719I	R843	Massilia_namucuonensis_strain_333-1-0411_(NR_118215.1)
H	2359	253	100	+	0	0	528I253M750I	R846	Hydrotalea_sandarakina_strain_AF-51_(NR_109380.1)						H	13206	253	99.6	+	0	0	518I253M719I	R844	Massilia_namucuonensis_strain_333-1-0411_(NR_118215.1)
H	2359	253	100	+	0	0	528I253M750I	R842	Hydrotalea_sandarakina_strain_AF-51_(NR_109380.1)						H	13206	253	99.6	+	0	0	518I253M719I	R845	Massilia_namucuonensis_strain_333-1-0411_(NR_118215.1)
H	2359	253	100	+	0	0	528I253M750I	R845	Hydrotalea_sandarakina_strain_AF-51_(NR_109380.1)						H	13206	253	99.6	+	0	0	518I253M719I	R846	Massilia_namucuonensis_strain_333-1-0411_(NR_118215.1)
H	2359	253	100	+	0	0	528I253M750I	R848	Hydrotalea_sandarakina_strain_AF-51_(NR_109380.1)						H	13206	253	99.6	+	0	0	518I253M719I	R847	Massilia_namucuonensis_strain_333-1-0411_(NR_118215.1)
H	2359	253	100	+	0	0	528I253M750I	R849	Hydrotalea_sandarakina_strain_AF-51_(NR_109380.1)						H	13206	253	99.6	+	0	0	518I253M719I	R848	Massilia_namucuonensis_strain_333-1-0411_(NR_118215.1)
H	2359	253	100	+	0	0	528I253M750I	R847	Hydrotalea_sandarakina_strain_AF-51_(NR_109380.1)						H	13206	253	99.6	+	0	0	518I253M719I	R849	Massilia_namucuonensis_strain_333-1-0411_(NR_118215.1)
H	2359	253	100	+	0	0	528I253M750I	R852	Hydrotalea_sandarakina_strain_AF-51_(NR_109380.1)						H	13206	253	99.6	+	0	0	518I253M719I	R850	Massilia_namucuonensis_strain_333-1-0411_(NR_118215.1)
H	2359	253	100	+	0	0	528I253M750I	R851	Hydrotalea_sandarakina_strain_AF-51_(NR_109380.1)						H	13206	253	99.6	+	0	0	518I253M719I	R851	Massilia_namucuonensis_strain_333-1-0411_(NR_118215.1)
H	2359	253	100	+	0	0	528I253M750I	R853	Hydrotalea_sandarakina_strain_AF-51_(NR_109380.1)						H	13206	253	99.6	+	0	0	518I253M719I	R852	Massilia_namucuonensis_strain_333-1-0411_(NR_118215.1)
H	2359	253	100	+	0	0	528I253M750I	R854	Hydrotalea_sandarakina_strain_AF-51_(NR_109380.1)						H	13206	253	99.6	+	0	0	518I253M719I	R853	Massilia_namucuonensis_strain_333-1-0411_(NR_118215.1)
H	2359	253	100	+	0	0	528I253M750I	R855	Hydrotalea_sandarakina_strain_AF-51_(NR_109380.1)						H	13206	253	99.6	+	0	0	518I253M719I	R854	Massilia_namucuonensis_strain_333-1-0411_(NR_118215.1)
H	2359	253	100	+	0	0	528I253M750I	R856	Hydrotalea_sandarakina_strain_AF-51_(NR_109380.1)						H	13206	253	99.6	+	0	0	518I253M719I	R855	Massilia_namucuonensis_strain_333-1-0411_(NR_118215.1)
H	2359	253	100	+	0	0	528I253M750I	R857	Hydrotalea_sandarakina_strain_AF-51_(NR_109380.1)						H	13206	253	99.6	+	0	0	518I253M719I	R857	Massilia_namucuonensis_strain_333-1-0411_(NR_118215.1)
H	2359	253	100	+	0	0	528I253M750I	R859	Hydrotalea_sandarakina_strain_AF-51_(NR_109380.1)						H	13206	253	99.6	+	0	0	518I253M719I	R858	Massilia_namucuonensis_strain_333-1-0411_(NR_118215.1)
H	2359	253	100	+	0	0	528I253M750I	R860	Hydrotalea_sandarakina_strain_AF-51_(NR_109380.1)						H	13206	253	99.6	+	0	0	518I253M719I	R859	Massilia_namucuonensis_strain_333-1-0411_(NR_118215.1)
H	2359	253	100	+	0	0	528I253M750I	R862	Hydrotalea_sandarakina_strain_AF-51_(NR_109380.1)						H	13206	253	99.6	+	0	0	518I253M719I	R856	Massilia_namucuonensis_strain_333-1-0411_(NR_118215.1)
H	2359	253	100	+	0	0	528I253M750I	R861	Hydrotalea_sandarakina_strain_AF-51_(NR_109380.1)						H	13206	253	99.6	+	0	0	518I253M719I	R860	Massilia_namucuonensis_strain_333-1-0411_(NR_118215.1)
H	2359	253	100	+	0	0	528I253M750I	R850	Hydrotalea_sandarakina_strain_AF-51_(NR_109380.1)						H	13206	253	99.6	+	0	0	518I253M719I	R862	Massilia_namucuonensis_strain_333-1-0411_(NR_118215.1)
H	2359	253	100	+	0	0	528I253M750I	R863	Hydrotalea_sandarakina_strain_AF-51_(NR_109380.1)						H	13206	253	99.6	+	0	0	518I253M719I	R863	Massilia_namucuonensis_strain_333-1-0411_(NR_118215.1)
H	2359	253	100	+	0	0	528I253M750I	R864	Hydrotalea_sandarakina_strain_AF-51_(NR_109380.1)						H	13206	253	99.6	+	0	0	518I253M719I	R864	Massilia_namucuonensis_strain_333-1-0411_(NR_118215.1)
H	2359	253	100	+	0	0	528I253M750I	R865	Hydrotalea_sandarakina_strain_AF-51_(NR_109380.1)						H	13206	253	99.6	+	0	0	518I253M719I	R861	Massilia_namucuonensis_strain_333-1-0411_(NR_118215.1)
H	2359	253	100	+	0	0	528I253M750I	R866	Hydrotalea_sandarakina_strain_AF-51_(NR_109380.1)						H	13206	253	99.6	+	0	0	518I253M719I	R866	Massilia_namucuonensis_strain_333-1-0411_(NR_118215.1)
H	2359	253	100	+	0	0	528I253M750I	R867	Hydrotalea_sandarakina_strain_AF-51_(NR_109380.1)						H	13206	253	99.6	+	0	0	518I253M719I	R865	Massilia_namucuonensis_strain_333-1-0411_(NR_118215.1)
H	2359	253	100	+	0	0	528I253M750I	R868	Hydrotalea_sandarakina_strain_AF-51_(NR_109380.1)						H	13206	253	99.6	+	0	0	518I253M719I	R867	Massilia_namucuonensis_strain_333-1-0411_(NR_118215.1)
H	2359	253	100	+	0	0	528I253M750I	R869	Hydrotalea_sandarakina_strain_AF-51_(NR_109380.1)						H	13206	253	99.6	+	0	0	518I253M719I	R868	Massilia_namucuonensis_strain_333-1-0411_(NR_118215.1)
H	2359	253	100	+	0	0	528I253M750I	R870	Hydrotalea_sandarakina_strain_AF-51_(NR_109380.1)						H	13206	253	99.6	+	0	0	518I253M719I	R869	Massilia_namucuonensis_strain_333-1-0411_(NR_118215.1)
H	2359	253	100	+	0	0	528I253M750I	R871	Hydrotalea_sandarakina_strain_AF-51_(NR_109380.1)						H	13206	253	99.6	+	0	0	518I253M719I	R871	Massilia_namucuonensis_strain_333-1-0411_(NR_118215.1)
H	2359	253	100	+	0	0	528I253M750I	R872	Hydrotalea_sandarakina_strain_AF-51_(NR_109380.1)						H	13206	253	99.6	+	0	0	518I253M719I	R872	Massilia_namucuonensis_strain_333-1-0411_(NR_118215.1)
H	2359	253	100	+	0	0	528I253M750I	R874	Hydrotalea_sandarakina_strain_AF-51_(NR_109380.1)						H	13206	253	99.6	+	0	0	518I253M719I	R870	Massilia_namucuonensis_strain_333-1-0411_(NR_118215.1)
H	2359	253	100	+	0	0	528I253M750I	R875	Hydrotalea_sandarakina_strain_AF-51_(NR_109380.1)						H	13206	253	99.6	+	0	0	518I253M719I	R874	Massilia_namucuonensis_strain_333-1-0411_(NR_118215.1)
H	2359	253	100	+	0	0	528I253M750I	R873	Hydrotalea_sandarakina_strain_AF-51_(NR_109380.1)						H	13206	253	99.6	+	0	0	518I253M719I	R873	Massilia_namucuonensis_strain_333-1-0411_(NR_118215.1)
H	2359	253	100	+	0	0	528I253M750I	R876	Hydrotalea_sandarakina_strain_AF-51_(NR_109380.1)						H	13206	253	99.6	+	0	0	518I253M719I	R875	Massilia_namucuonensis_strain_333-1-0411_(NR_118215.1)
H	2359	253	100	+	0	0	528I253M750I	R878	Hydrotalea_sandarakina_strain_AF-51_(NR_109380.1)						H	13206	253	99.6	+	0	0	518I253M719I	R876	Massilia_namucuonensis_strain_333-1-0411_(NR_118215.1)
H	2359	253	100	+	0	0	528I253M750I	R879	Hydrotalea_sandarakina_strain_AF-51_(NR_109380.1)						H	13206	253	99.6	+	0	0	518I253M719I	R877	Massilia_namucuonensis_strain_333-1-0411_(NR_118215.1)
H	2359	253	100	+	0	0	528I253M750I	R881	Hydrotalea_sandarakina_strain_AF-51_(NR_109380.1)						H	13206	253	99.6	+	0	0	518I253M719I	R878	Massilia_namucuonensis_strain_333-1-0411_(NR_118215.1)
H	2359	253	100	+	0	0	528I253M750I	R880	Hydrotalea_sandarakina_strain_AF-51_(NR_109380.1)						H	13206	253	99.6	+	0	0	518I253M719I	R879	Massilia_namucuonensis_strain_333-1-0411_(NR_118215.1)
H	2359	253	100	+	0	0	528I253M750I	R858	Hydrotalea_sandarakina_strain_AF-51_(NR_109380.1)						H	13206	253	99.6	+	0	0	518I253M719I	R880	Massilia_namucuonensis_strain_333-1-0411_(NR_118215.1)
H	2359	253	100	+	0	0	528I253M750I	R882	Hydrotalea_sandarakina_strain_AF-51_(NR_109380.1)						H	13206	253	99.6	+	0	0	518I253M719I	R882	Massilia_namucuonensis_strain_333-1-0411_(NR_118215.1)
H	2359	253	100	+	0	0	528I253M750I	R883	Hydrotalea_sandarakina_strain_AF-51_(NR_109380.1)						H	13206	253	99.6	+	0	0	518I253M719I	R883	Massilia_namucuonensis_strain_333-1-0411_(NR_118215.1)
H	2359	253	100	+	0	0	528I253M750I	R884	Hydrotalea_sandarakina_strain_AF-51_(NR_109380.1)						H	13206	253	99.6	+	0	0	518I253M719I	R884	Massilia_namucuonensis_strain_333-1-0411_(NR_118215.1)
H	2359	253	100	+	0	0	528I253M750I	R885	Hydrotalea_sandarakina_strain_AF-51_(NR_109380.1)						H	13206	253	99.6	+	0	0	518I253M719I	R881	Massilia_namucuonensis_strain_333-1-0411_(NR_118215.1)
H	2359	253	100	+	0	0	528I253M750I	R886	Hydrotalea_sandarakina_strain_AF-51_(NR_109380.1)						H	13206	253	99.6	+	0	0	518I253M719I	R885	Massilia_namucuonensis_strain_333-1-0411_(NR_118215.1)
H	2359	253	100	+	0	0	528I253M750I	R887	Hydrotalea_sandarakina_strain_AF-51_(NR_109380.1)						H	13206	253	99.6	+	0	0	518I253M719I	R886	Massilia_namucuonensis_strain_333-1-0411_(NR_118215.1)
H	2359	253	100	+	0	0	528I253M750I	R890	Hydrotalea_sandarakina_strain_AF-51_(NR_109380.1)						H	13206	253	99.6	+	0	0	518I253M719I	R887	Massilia_namucuonensis_strain_333-1-0411_(NR_118215.1)
H	2359	253	100	+	0	0	528I253M750I	R877	Hydrotalea_sandarakina_strain_AF-51_(NR_109380.1)						H	13206	253	99.6	+	0	0	518I253M719I	R888	Massilia_namucuonensis_strain_333-1-0411_(NR_118215.1)
H	2359	253	100	+	0	0	528I253M750I	R888	Hydrotalea_sandarakina_strain_AF-51_(NR_109380.1)						H	13206	253	99.6	+	0	0	518I253M719I	R889	Massilia_namucuonensis_strain_333-1-0411_(NR_118215.1)
H	2359	253	100	+	0	0	528I253M750I	R891	Hydrotalea_sandarakina_strain_AF-51_(NR_109380.1)						H	13206	253	99.6	+	0	0	518I253M719I	R890	Massilia_namucuonensis_strain_333-1-0411_(NR_118215.1)
H	2359	253	100	+	0	0	528I253M750I	R893	Hydrotalea_sandarakina_strain_AF-51_(NR_109380.1)						H	13206	253	99.6	+	0	0	518I253M719I	R891	Massilia_namucuonensis_strain_333-1-0411_(NR_118215.1)
H	2359	253	100	+	0	0	528I253M750I	R892	Hydrotalea_sandarakina_strain_AF-51_(NR_109380.1)						H	13206	253	99.6	+	0	0	518I253M719I	R892	Massilia_namucuonensis_strain_333-1-0411_(NR_118215.1)
H	2359	253	100	+	0	0	528I253M750I	R894	Hydrotalea_sandarakina_strain_AF-51_(NR_109380.1)						H	13206	253	99.6	+	0	0	518I253M719I	R893	Massilia_namucuonensis_strain_333-1-0411_(NR_118215.1)
H	2359	253	100	+	0	0	528I253M750I	R895	Hydrotalea_sandarakina_strain_AF-51_(NR_109380.1)						H	13206	253	99.6	+	0	0	518I253M719I	R894	Massilia_namucuonensis_strain_333-1-0411_(NR_118215.1)
H	2359	253	100	+	0	0	528I253M750I	R896	Hydrotalea_sandarakina_strain_AF-51_(NR_109380.1)						H	13206	253	99.6	+	0	0	518I253M719I	R895	Massilia_namucuonensis_strain_333-1-0411_(NR_118215.1)
H	2359	253	100	+	0	0	528I253M750I	R897	Hydrotalea_sandarakina_strain_AF-51_(NR_109380.1)						H	13206	253	99.6	+	0	0	518I253M719I	R896	Massilia_namucuonensis_strain_333-1-0411_(NR_118215.1)
H	2359	253	100	+	0	0	528I253M750I	R899	Hydrotalea_sandarakina_strain_AF-51_(NR_109380.1)						H	13206	253	99.6	+	0	0	518I253M719I	R897	Massilia_namucuonensis_strain_333-1-0411_(NR_118215.1)
H	2359	253	100	+	0	0	528I253M750I	R889	Hydrotalea_sandarakina_strain_AF-51_(NR_109380.1)						H	13206	253	99.6	+	0	0	518I253M719I	R898	Massilia_namucuonensis_strain_333-1-0411_(NR_118215.1)
H	2359	253	100	+	0	0	528I253M750I	R900	Hydrotalea_sandarakina_strain_AF-51_(NR_109380.1)						H	13206	253	99.6	+	0	0	518I253M719I	R899	Massilia_namucuonensis_strain_333-1-0411_(NR_118215.1)
H	13206	253	99.6	+	0	0	518I253M719I	R901	Massilia_namucuonensis_strain_333-1-0411_(NR_118215.1)						H	13206	253	99.6	+	0	0	518I253M719I	R900	Massilia_namucuonensis_strain_333-1-0411_(NR_118215.1)
H	13206	253	99.6	+	0	0	518I253M719I	R902	Massilia_namucuonensis_strain_333-1-0411_(NR_118215.1)						H	13206	253	99.6	+	0	0	518I253M719I	R901	Massilia_namucuonensis_strain_333-1-0411_(NR_118215.1)
H	13206	253	99.6	+	0	0	518I253M719I	R904	Massilia_namucuonensis_strain_333-1-0411_(NR_118215.1)						H	13206	253	99.6	+	0	0	518I253M719I	R902	Massilia_namucuonensis_strain_333-1-0411_(NR_118215.1)
H	13206	253	99.6	+	0	0	518I253M719I	R903	Massilia_namucuonensis_strain_333-1-0411_(NR_118215.1)						H	13206	253	99.6	+	0	0	518I253M719I	R904	Massilia_namucuonensis_strain_333-1-0411_(NR_118215.1)
H	13206	253	99.6	+	0	0	518I253M719I	R905	Massilia_namucuonensis_strain_333-1-0411_(NR_118215.1)						H	13206	253	99.6	+	0	0	518I253M719I	R905	Massilia_namucuonensis_strain_333-1-0411_(NR_118215.1)
H	13206	253	99.6	+	0	0	518I253M719I	R907	Massilia_namucuonensis_strain_333-1-0411_(NR_118215.1)						H	13206	253	99.6	+	0	0	518I253M719I	R903	Massilia_namucuonensis_strain_333-1-0411_(NR_118215.1)
H	13206	253	99.6	+	0	0	518I253M719I	R906	Massilia_namucuonensis_strain_333-1-0411_(NR_118215.1)						H	13206	253	99.6	+	0	0	518I253M719I	R906	Massilia_namucuonensis_strain_333-1-0411_(NR_118215.1)
H	13206	253	99.6	+	0	0	518I253M719I	R908	Massilia_namucuonensis_strain_333-1-0411_(NR_118215.1)						H	13206	253	99.6	+	0	0	518I253M719I	R907	Massilia_namucuonensis_strain_333-1-0411_(NR_118215.1)
H	13206	253	99.6	+	0	0	518I253M719I	R909	Massilia_namucuonensis_strain_333-1-0411_(NR_118215.1)						H	13206	253	99.6	+	0	0	518I253M719I	R908	Massilia_namucuonensis_strain_333-1-0411_(NR_118215.1)
H	13206	253	99.6	+	0	0	518I253M719I	R910	Massilia_namucuonensis_strain_333-1-0411_(NR_118215.1)						H	13206	253	99.6	+	0	0	518I253M719I	R909	Massilia_namucuonensis_strain_333-1-0411_(NR_118215.1)
H	13206	253	99.6	+	0	0	518I253M719I	R911	Massilia_namucuonensis_strain_333-1-0411_(NR_118215.1)						H	13206	253	99.6	+	0	0	518I253M719I	R910	Massilia_namucuonensis_strain_333-1-0411_(NR_118215.1)
H	13206	253	99.6	+	0	0	518I253M719I	R912	Massilia_namucuonensis_strain_333-1-0411_(NR_118215.1)						H	13206	253	99.6	+	0	0	518I253M719I	R911	Massilia_namucuonensis_strain_333-1-0411_(NR_118215.1)
H	13206	253	99.6	+	0	0	518I253M719I	R914	Massilia_namucuonensis_strain_333-1-0411_(NR_118215.1)						H	13206	253	99.6	+	0	0	518I253M719I	R912	Massilia_namucuonensis_strain_333-1-0411_(NR_118215.1)
H	13206	253	99.6	+	0	0	518I253M719I	R913	Massilia_namucuonensis_strain_333-1-0411_(NR_118215.1)						H	13206	253	99.6	+	0	0	518I253M719I	R913	Massilia_namucuonensis_strain_333-1-0411_(NR_118215.1)
H	2359	253	100	+	0	0	528I253M750I	R898	Hydrotalea_sandarakina_strain_AF-51_(NR_109380.1)						H	13206	253	99.6	+	0	0	518I253M719I	R914	Massilia_namucuonensis_strain_333-1-0411_(NR_118215.1)
H	13206	253	99.6	+	0	0	518I253M719I	R916	Massilia_namucuonensis_strain_333-1-0411_(NR_118215.1)						H	13206	253	99.6	+	0	0	518I253M719I	R915	Massilia_namucuonensis_strain_333-1-0411_(NR_118215.1)
H	13206	253	99.6	+	0	0	518I253M719I	R917	Massilia_namucuonensis_strain_333-1-0411_(NR_118215.1)						H	13206	253	99.6	+	0	0	518I253M719I	R916	Massilia_namucuonensis_strain_333-1-0411_(NR_118215.1)
H	13206	253	99.6	+	0	0	518I253M719I	R918	Massilia_namucuonensis_strain_333-1-0411_(NR_118215.1)						H	13206	253	99.6	+	0	0	518I253M719I	R917	Massilia_namucuonensis_strain_333-1-0411_(NR_118215.1)
H	13206	253	99.6	+	0	0	518I253M719I	R919	Massilia_namucuonensis_strain_333-1-0411_(NR_118215.1)						H	13206	253	99.6	+	0	0	518I253M719I	R918	Massilia_namucuonensis_strain_333-1-0411_(NR_118215.1)
H	13206	253	99.6	+	0	0	518I253M719I	R920	Massilia_namucuonensis_strain_333-1-0411_(NR_118215.1)						H	13206	253	99.6	+	0	0	518I253M719I	R919	Massilia_namucuonensis_strain_333-1-0411_(NR_118215.1)
H	13206	253	99.6	+	0	0	518I253M719I	R921	Massilia_namucuonensis_strain_333-1-0411_(NR_118215.1)						H	13206	253	99.6	+	0	0	518I253M719I	R920	Massilia_namucuonensis_strain_333-1-0411_(NR_118215.1)
H	13206	253	99.6	+	0	0	518I253M719I	R922	Massilia_namucuonensis_strain_333-1-0411_(NR_118215.1)						H	13206	253	99.6	+	0	0	518I253M719I	R921	Massilia_namucuonensis_strain_333-1-0411_(NR_118215.1)
H	13206	253	99.6	+	0	0	518I253M719I	R923	Massilia_namucuonensis_strain_333-1-0411_(NR_118215.1)						H	13206	253	99.6	+	0	0	518I253M719I	R922	Massilia_namucuonensis_strain_333-1-0411_(NR_118215.1)
H	13206	253	99.6	+	0	0	518I253M719I	R924	Massilia_namucuonensis_strain_333-1-0411_(NR_118215.1)						H	13206	253	99.6	+	0	0	518I253M719I	R923	Massilia_namucuonensis_strain_333-1-0411_(NR_118215.1)
H	13206	253	99.6	+	0	0	518I253M719I	R925	Massilia_namucuonensis_strain_333-1-0411_(NR_118215.1)						H	13206	253	99.6	+	0	0	518I253M719I	R924	Massilia_namucuonensis_strain_333-1-0411_(NR_118215.1)
H	13206	253	99.6	+	0	0	518I253M719I	R915	Massilia_namucuonensis_strain_333-1-0411_(NR_118215.1)						H	13206	253	99.6	+	0	0	518I253M719I	R925	Massilia_namucuonensis_strain_333-1-0411_(NR_118215.1)
H	13206	253	99.6	+	0	0	518I253M719I	R927	Massilia_namucuonensis_strain_333-1-0411_(NR_118215.1)						H	13206	253	99.6	+	0	0	518I253M719I	R927	Massilia_namucuonensis_strain_333-1-0411_(NR_118215.1)
H	13206	253	99.6	+	0	0	518I253M719I	R928	Massilia_namucuonensis_strain_333-1-0411_(NR_118215.1)						H	13206	253	99.6	+	0	0	518I253M719I	R928	Massilia_namucuonensis_strain_333-1-0411_(NR_118215.1)
H	13206	253	99.6	+	0	0	518I253M719I	R929	Massilia_namucuonensis_strain_333-1-0411_(NR_118215.1)						H	13206	253	99.6	+	0	0	518I253M719I	R926	Massilia_namucuonensis_strain_333-1-0411_(NR_118215.1)
H	13206	253	99.6	+	0	0	518I253M719I	R930	Massilia_namucuonensis_strain_333-1-0411_(NR_118215.1)						H	13206	253	99.6	+	0	0	518I253M719I	R929	Massilia_namucuonensis_strain_333-1-0411_(NR_118215.1)
H	13206	253	99.6	+	0	0	518I253M719I	R932	Massilia_namucuonensis_strain_333-1-0411_(NR_118215.1)						H	13206	253	99.6	+	0	0	518I253M719I	R930	Massilia_namucuonensis_strain_333-1-0411_(NR_118215.1)
H	13206	253	99.6	+	0	0	518I253M719I	R933	Massilia_namucuonensis_strain_333-1-0411_(NR_118215.1)						H	13206	253	99.6	+	0	0	518I253M719I	R931	Massilia_namucuonensis_strain_333-1-0411_(NR_118215.1)
H	13206	253	99.6	+	0	0	518I253M719I	R926	Massilia_namucuonensis_strain_333-1-0411_(NR_118215.1)						H	13206	253	99.6	+	0	0	518I253M719I	R932	Massilia_namucuonensis_strain_333-1-0411_(NR_118215.1)
H	13206	253	99.6	+	0	0	518I253M719I	R934	Massilia_namucuonensis_strain_333-1-0411_(NR_118215.1)						H	13206	253	99.6	+	0	0	518I253M719I	R933	Massilia_namucuonensis_strain_333-1-0411_(NR_118215.1)
H	13206	253	99.6	+	0	0	518I253M719I	R935	Massilia_namucuonensis_strain_333-1-0411_(NR_118215.1)						H	13206	253	99.6	+	0	0	518I253M719I	R934	Massilia_namucuonensis_strain_333-1-0411_(NR_118215.1)
H	13206	253	99.6	+	0	0	518I253M719I	R936	Massilia_namucuonensis_strain_333-1-0411_(NR_118215.1)						H	13206	253	99.6	+	0	0	518I253M719I	R935	Massilia_namucuonensis_strain_333-1-0411_(NR_118215.1)
H	13206	253	99.6	+	0	0	518I253M719I	R931	Massilia_namucuonensis_strain_333-1-0411_(NR_118215.1)						H	13206	253	99.6	+	0	0	518I253M719I	R936	Massilia_namucuonensis_strain_333-1-0411_(NR_118215.1)
H	13206	253	99.6	+	0	0	518I253M719I	R937	Massilia_namucuonensis_strain_333-1-0411_(NR_118215.1)						H	13206	253	99.6	+	0	0	518I253M719I	R937	Massilia_namucuonensis_strain_333-1-0411_(NR_118215.1)
H	13206	253	99.6	+	0	0	518I253M719I	R938	Massilia_namucuonensis_strain_333-1-0411_(NR_118215.1)						H	7113	253	100	+	0	0	506I253M726I	R938	Tetrasphaera_duodecadis_strain_IAM_14868_(NR_040880.1)
H	13206	253	99.6	+	0	0	518I253M719I	R939	Massilia_namucuonensis_strain_333-1-0411_(NR_118215.1)						H	7113	253	100	+	0	0	506I253M726I	R940	Tetrasphaera_duodecadis_strain_IAM_14868_(NR_040880.1)
H	13206	253	99.6	+	0	0	518I253M719I	R941	Massilia_namucuonensis_strain_333-1-0411_(NR_118215.1)						H	7113	253	100	+	0	0	506I253M726I	R939	Tetrasphaera_duodecadis_strain_IAM_14868_(NR_040880.1)
H	13206	253	99.6	+	0	0	518I253M719I	R943	Massilia_namucuonensis_strain_333-1-0411_(NR_118215.1)						H	7113	253	100	+	0	0	506I253M726I	R941	Tetrasphaera_duodecadis_strain_IAM_14868_(NR_040880.1)
H	13206	253	99.6	+	0	0	518I253M719I	R940	Massilia_namucuonensis_strain_333-1-0411_(NR_118215.1)						H	7113	253	100	+	0	0	506I253M726I	R942	Tetrasphaera_duodecadis_strain_IAM_14868_(NR_040880.1)
H	13206	253	99.6	+	0	0	518I253M719I	R942	Massilia_namucuonensis_strain_333-1-0411_(NR_118215.1)						H	7113	253	100	+	0	0	506I253M726I	R943	Tetrasphaera_duodecadis_strain_IAM_14868_(NR_040880.1)
H	13206	253	99.6	+	0	0	518I253M719I	R944	Massilia_namucuonensis_strain_333-1-0411_(NR_118215.1)						H	7113	253	100	+	0	0	506I253M726I	R944	Tetrasphaera_duodecadis_strain_IAM_14868_(NR_040880.1)
H	13206	253	99.6	+	0	0	518I253M719I	R945	Massilia_namucuonensis_strain_333-1-0411_(NR_118215.1)						H	7113	253	100	+	0	0	506I253M726I	R945	Tetrasphaera_duodecadis_strain_IAM_14868_(NR_040880.1)
H	13206	253	99.6	+	0	0	518I253M719I	R946	Massilia_namucuonensis_strain_333-1-0411_(NR_118215.1)						H	7113	253	100	+	0	0	506I253M726I	R947	Tetrasphaera_duodecadis_strain_IAM_14868_(NR_040880.1)
H	13206	253	99.6	+	0	0	518I253M719I	R947	Massilia_namucuonensis_strain_333-1-0411_(NR_118215.1)						H	7113	253	100	+	0	0	506I253M726I	R949	Tetrasphaera_duodecadis_strain_IAM_14868_(NR_040880.1)
H	13206	253	99.6	+	0	0	518I253M719I	R948	Massilia_namucuonensis_strain_333-1-0411_(NR_118215.1)						H	7113	253	100	+	0	0	506I253M726I	R948	Tetrasphaera_duodecadis_strain_IAM_14868_(NR_040880.1)
H	13206	253	99.6	+	0	0	518I253M719I	R949	Massilia_namucuonensis_strain_333-1-0411_(NR_118215.1)						H	7113	253	100	+	0	0	506I253M726I	R946	Tetrasphaera_duodecadis_strain_IAM_14868_(NR_040880.1)
H	13206	253	99.6	+	0	0	518I253M719I	R950	Massilia_namucuonensis_strain_333-1-0411_(NR_118215.1)						H	7113	253	100	+	0	0	506I253M726I	R950	Tetrasphaera_duodecadis_strain_IAM_14868_(NR_040880.1)
H	13206	253	99.6	+	0	0	518I253M719I	R951	Massilia_namucuonensis_strain_333-1-0411_(NR_118215.1)						H	7113	253	100	+	0	0	506I253M726I	R951	Tetrasphaera_duodecadis_strain_IAM_14868_(NR_040880.1)
H	13206	253	99.6	+	0	0	518I253M719I	R952	Massilia_namucuonensis_strain_333-1-0411_(NR_118215.1)						H	7113	253	100	+	0	0	506I253M726I	R952	Tetrasphaera_duodecadis_strain_IAM_14868_(NR_040880.1)
H	13206	253	99.6	+	0	0	518I253M719I	R953	Massilia_namucuonensis_strain_333-1-0411_(NR_118215.1)						H	7113	253	100	+	0	0	506I253M726I	R953	Tetrasphaera_duodecadis_strain_IAM_14868_(NR_040880.1)
H	13206	253	99.6	+	0	0	518I253M719I	R954	Massilia_namucuonensis_strain_333-1-0411_(NR_118215.1)						H	7113	253	100	+	0	0	506I253M726I	R955	Tetrasphaera_duodecadis_strain_IAM_14868_(NR_040880.1)
H	13206	253	99.6	+	0	0	518I253M719I	R956	Massilia_namucuonensis_strain_333-1-0411_(NR_118215.1)						H	7113	253	100	+	0	0	506I253M726I	R956	Tetrasphaera_duodecadis_strain_IAM_14868_(NR_040880.1)
H	13206	253	99.6	+	0	0	518I253M719I	R957	Massilia_namucuonensis_strain_333-1-0411_(NR_118215.1)						H	7113	253	100	+	0	0	506I253M726I	R957	Tetrasphaera_duodecadis_strain_IAM_14868_(NR_040880.1)
H	13206	253	99.6	+	0	0	518I253M719I	R958	Massilia_namucuonensis_strain_333-1-0411_(NR_118215.1)						H	7113	253	100	+	0	0	506I253M726I	R958	Tetrasphaera_duodecadis_strain_IAM_14868_(NR_040880.1)
H	13206	253	99.6	+	0	0	518I253M719I	R959	Massilia_namucuonensis_strain_333-1-0411_(NR_118215.1)						H	7113	253	100	+	0	0	506I253M726I	R960	Tetrasphaera_duodecadis_strain_IAM_14868_(NR_040880.1)
H	13206	253	99.6	+	0	0	518I253M719I	R960	Massilia_namucuonensis_strain_333-1-0411_(NR_118215.1)						H	7113	253	100	+	0	0	506I253M726I	R959	Tetrasphaera_duodecadis_strain_IAM_14868_(NR_040880.1)
H	13206	253	99.6	+	0	0	518I253M719I	R961	Massilia_namucuonensis_strain_333-1-0411_(NR_118215.1)						H	7113	253	100	+	0	0	506I253M726I	R954	Tetrasphaera_duodecadis_strain_IAM_14868_(NR_040880.1)
H	13206	253	99.6	+	0	0	518I253M719I	R963	Massilia_namucuonensis_strain_333-1-0411_(NR_118215.1)						H	7113	253	100	+	0	0	506I253M726I	R961	Tetrasphaera_duodecadis_strain_IAM_14868_(NR_040880.1)
H	13206	253	99.6	+	0	0	518I253M719I	R964	Massilia_namucuonensis_strain_333-1-0411_(NR_118215.1)						H	7113	253	100	+	0	0	506I253M726I	R962	Tetrasphaera_duodecadis_strain_IAM_14868_(NR_040880.1)
H	13206	253	99.6	+	0	0	518I253M719I	R965	Massilia_namucuonensis_strain_333-1-0411_(NR_118215.1)						H	7113	253	100	+	0	0	506I253M726I	R963	Tetrasphaera_duodecadis_strain_IAM_14868_(NR_040880.1)
H	13206	253	99.6	+	0	0	518I253M719I	R966	Massilia_namucuonensis_strain_333-1-0411_(NR_118215.1)						H	7113	253	100	+	0	0	506I253M726I	R965	Tetrasphaera_duodecadis_strain_IAM_14868_(NR_040880.1)
H	13206	253	99.6	+	0	0	518I253M719I	R955	Massilia_namucuonensis_strain_333-1-0411_(NR_118215.1)						H	7113	253	100	+	0	0	506I253M726I	R966	Tetrasphaera_duodecadis_strain_IAM_14868_(NR_040880.1)
H	13206	253	99.6	+	0	0	518I253M719I	R968	Massilia_namucuonensis_strain_333-1-0411_(NR_118215.1)						H	7113	253	100	+	0	0	506I253M726I	R964	Tetrasphaera_duodecadis_strain_IAM_14868_(NR_040880.1)
H	13206	253	99.6	+	0	0	518I253M719I	R962	Massilia_namucuonensis_strain_333-1-0411_(NR_118215.1)						H	7113	253	100	+	0	0	506I253M726I	R967	Tetrasphaera_duodecadis_strain_IAM_14868_(NR_040880.1)
H	13206	253	99.6	+	0	0	518I253M719I	R969	Massilia_namucuonensis_strain_333-1-0411_(NR_118215.1)						H	7113	253	100	+	0	0	506I253M726I	R968	Tetrasphaera_duodecadis_strain_IAM_14868_(NR_040880.1)
H	13206	253	99.6	+	0	0	518I253M719I	R970	Massilia_namucuonensis_strain_333-1-0411_(NR_118215.1)						H	7113	253	100	+	0	0	506I253M726I	R969	Tetrasphaera_duodecadis_strain_IAM_14868_(NR_040880.1)
H	13206	253	99.6	+	0	0	518I253M719I	R971	Massilia_namucuonensis_strain_333-1-0411_(NR_118215.1)						H	7113	253	100	+	0	0	506I253M726I	R971	Tetrasphaera_duodecadis_strain_IAM_14868_(NR_040880.1)
H	13206	253	99.6	+	0	0	518I253M719I	R972	Massilia_namucuonensis_strain_333-1-0411_(NR_118215.1)						H	7113	253	100	+	0	0	506I253M726I	R970	Tetrasphaera_duodecadis_strain_IAM_14868_(NR_040880.1)
H	13206	253	99.6	+	0	0	518I253M719I	R974	Massilia_namucuonensis_strain_333-1-0411_(NR_118215.1)						H	7113	253	100	+	0	0	506I253M726I	R972	Tetrasphaera_duodecadis_strain_IAM_14868_(NR_040880.1)
H	13206	253	99.6	+	0	0	518I253M719I	R975	Massilia_namucuonensis_strain_333-1-0411_(NR_118215.1)						H	7113	253	100	+	0	0	506I253M726I	R973	Tetrasphaera_duodecadis_strain_IAM_14868_(NR_040880.1)
H	13206	253	99.6	+	0	0	518I253M719I	R967	Massilia_namucuonensis_strain_333-1-0411_(NR_118215.1)						H	7113	253	100	+	0	0	506I253M726I	R974	Tetrasphaera_duodecadis_strain_IAM_14868_(NR_040880.1)
H	13206	253	99.6	+	0	0	518I253M719I	R977	Massilia_namucuonensis_strain_333-1-0411_(NR_118215.1)						H	7113	253	100	+	0	0	506I253M726I	R975	Tetrasphaera_duodecadis_strain_IAM_14868_(NR_040880.1)
H	13206	253	99.6	+	0	0	518I253M719I	R978	Massilia_namucuonensis_strain_333-1-0411_(NR_118215.1)						H	7113	253	100	+	0	0	506I253M726I	R976	Tetrasphaera_duodecadis_strain_IAM_14868_(NR_040880.1)
H	13206	253	99.6	+	0	0	518I253M719I	R976	Massilia_namucuonensis_strain_333-1-0411_(NR_118215.1)						H	7113	253	100	+	0	0	506I253M726I	R977	Tetrasphaera_duodecadis_strain_IAM_14868_(NR_040880.1)
H	13206	253	99.6	+	0	0	518I253M719I	R973	Massilia_namucuonensis_strain_333-1-0411_(NR_118215.1)						H	7113	253	100	+	0	0	506I253M726I	R978	Tetrasphaera_duodecadis_strain_IAM_14868_(NR_040880.1)
H	13206	253	99.6	+	0	0	518I253M719I	R979	Massilia_namucuonensis_strain_333-1-0411_(NR_118215.1)						H	7113	253	100	+	0	0	506I253M726I	R979	Tetrasphaera_duodecadis_strain_IAM_14868_(NR_040880.1)
H	13206	253	99.6	+	0	0	518I253M719I	R980	Massilia_namucuonensis_strain_333-1-0411_(NR_118215.1)						H	7113	253	100	+	0	0	506I253M726I	R981	Tetrasphaera_duodecadis_strain_IAM_14868_(NR_040880.1)
H	13206	253	99.6	+	0	0	518I253M719I	R981	Massilia_namucuonensis_strain_333-1-0411_(NR_118215.1)						H	7113	253	100	+	0	0	506I253M726I	R980	Tetrasphaera_duodecadis_strain_IAM_14868_(NR_040880.1)
H	13206	253	99.6	+	0	0	518I253M719I	R982	Massilia_namucuonensis_strain_333-1-0411_(NR_118215.1)						H	7113	253	100	+	0	0	506I253M726I	R982	Tetrasphaera_duodecadis_strain_IAM_14868_(NR_040880.1)
H	13206	253	99.6	+	0	0	518I253M719I	R983	Massilia_namucuonensis_strain_333-1-0411_(NR_118215.1)						H	7113	253	100	+	0	0	506I253M726I	R983	Tetrasphaera_duodecadis_strain_IAM_14868_(NR_040880.1)
H	13206	253	99.6	+	0	0	518I253M719I	R985	Massilia_namucuonensis_strain_333-1-0411_(NR_118215.1)						H	7113	253	100	+	0	0	506I253M726I	R984	Tetrasphaera_duodecadis_strain_IAM_14868_(NR_040880.1)
H	13206	253	99.6	+	0	0	518I253M719I	R984	Massilia_namucuonensis_strain_333-1-0411_(NR_118215.1)						H	7113	253	100	+	0	0	506I253M726I	R985	Tetrasphaera_duodecadis_strain_IAM_14868_(NR_040880.1)
H	13206	253	99.6	+	0	0	518I253M719I	R986	Massilia_namucuonensis_strain_333-1-0411_(NR_118215.1)						H	7113	253	100	+	0	0	506I253M726I	R986	Tetrasphaera_duodecadis_strain_IAM_14868_(NR_040880.1)
H	13206	253	99.6	+	0	0	518I253M719I	R987	Massilia_namucuonensis_strain_333-1-0411_(NR_118215.1)						H	7113	253	100	+	0	0	506I253M726I	R987	Tetrasphaera_duodecadis_strain_IAM_14868_(NR_040880.1)
H	13206	253	99.6	+	0	0	518I253M719I	R988	Massilia_namucuonensis_strain_333-1-0411_(NR_118215.1)						H	7113	253	100	+	0	0	506I253M726I	R988	Tetrasphaera_duodecadis_strain_IAM_14868_(NR_040880.1)
H	13206	253	99.6	+	0	0	518I253M719I	R990	Massilia_namucuonensis_strain_333-1-0411_(NR_118215.1)						H	7113	253	100	+	0	0	506I253M726I	R989	Tetrasphaera_duodecadis_strain_IAM_14868_(NR_040880.1)
H	13206	253	99.6	+	0	0	518I253M719I	R989	Massilia_namucuonensis_strain_333-1-0411_(NR_118215.1)						H	7113	253	100	+	0	0	506I253M726I	R990	Tetrasphaera_duodecadis_strain_IAM_14868_(NR_040880.1)
H	13206	253	99.6	+	0	0	518I253M719I	R991	Massilia_namucuonensis_strain_333-1-0411_(NR_118215.1)						H	7113	253	100	+	0	0	506I253M726I	R991	Tetrasphaera_duodecadis_strain_IAM_14868_(NR_040880.1)
H	13206	253	99.6	+	0	0	518I253M719I	R992	Massilia_namucuonensis_strain_333-1-0411_(NR_118215.1)						H	7113	253	100	+	0	0	506I253M726I	R992	Tetrasphaera_duodecadis_strain_IAM_14868_(NR_040880.1)
H	13206	253	99.6	+	0	0	518I253M719I	R993	Massilia_namucuonensis_strain_333-1-0411_(NR_118215.1)						H	7113	253	100	+	0	0	506I253M726I	R993	Tetrasphaera_duodecadis_strain_IAM_14868_(NR_040880.1)
H	13206	253	99.6	+	0	0	518I253M719I	R994	Massilia_namucuonensis_strain_333-1-0411_(NR_118215.1)						H	7113	253	100	+	0	0	506I253M726I	R994	Tetrasphaera_duodecadis_strain_IAM_14868_(NR_040880.1)
H	13206	253	99.6	+	0	0	518I253M719I	R995	Massilia_namucuonensis_strain_333-1-0411_(NR_118215.1)						H	7113	253	100	+	0	0	506I253M726I	R995	Tetrasphaera_duodecadis_strain_IAM_14868_(NR_040880.1)
H	13206	253	99.6	+	0	0	518I253M719I	R996	Massilia_namucuonensis_strain_333-1-0411_(NR_118215.1)						H	7113	253	100	+	0	0	506I253M726I	R996	Tetrasphaera_duodecadis_strain_IAM_14868_(NR_040880.1)
H	13206	253	99.6	+	0	0	518I253M719I	R997	Massilia_namucuonensis_strain_333-1-0411_(NR_118215.1)						H	7113	253	100	+	0	0	506I253M726I	R997	Tetrasphaera_duodecadis_strain_IAM_14868_(NR_040880.1)
H	13206	253	99.6	+	0	0	518I253M719I	R1000	Massilia_namucuonensis_strain_333-1-0411_(NR_118215.1)						H	7113	253	100	+	0	0	506I253M726I	R998	Tetrasphaera_duodecadis_strain_IAM_14868_(NR_040880.1)
H	13206	253	99.6	+	0	0	518I253M719I	R998	Massilia_namucuonensis_strain_333-1-0411_(NR_118215.1)						H	7113	253	100	+	0	0	506I253M726I	R999	Tetrasphaera_duodecadis_strain_IAM_14868_(NR_040880.1)
H	13206	253	99.6	+	0	0	518I253M719I	R999	Massilia_namucuonensis_strain_333-1-0411_(NR_118215.1)						H	7113	253	100	+	0	0	506I253M726I	R1000	Tetrasphaera_duodecadis_strain_IAM_14868_(NR_040880.1)
H	13206	253	99.6	+	0	0	518I253M719I	R1001	Massilia_namucuonensis_strain_333-1-0411_(NR_118215.1)						H	7113	253	100	+	0	0	506I253M726I	R1001	Tetrasphaera_duodecadis_strain_IAM_14868_(NR_040880.1)
H	13206	253	99.6	+	0	0	518I253M719I	R1002	Massilia_namucuonensis_strain_333-1-0411_(NR_118215.1)						H	7113	253	100	+	0	0	506I253M726I	R1002	Tetrasphaera_duodecadis_strain_IAM_14868_(NR_040880.1)
H	13206	253	99.6	+	0	0	518I253M719I	R1003	Massilia_namucuonensis_strain_333-1-0411_(NR_118215.1)						H	7113	253	100	+	0	0	506I253M726I	R1003	Tetrasphaera_duodecadis_strain_IAM_14868_(NR_040880.1)
H	13206	253	99.6	+	0	0	518I253M719I	R1005	Massilia_namucuonensis_strain_333-1-0411_(NR_118215.1)						H	7113	253	100	+	0	0	506I253M726I	R1004	Tetrasphaera_duodecadis_strain_IAM_14868_(NR_040880.1)
H	13206	253	99.6	+	0	0	518I253M719I	R1006	Massilia_namucuonensis_strain_333-1-0411_(NR_118215.1)						H	7113	253	100	+	0	0	506I253M726I	R1005	Tetrasphaera_duodecadis_strain_IAM_14868_(NR_040880.1)
H	13206	253	99.6	+	0	0	518I253M719I	R1007	Massilia_namucuonensis_strain_333-1-0411_(NR_118215.1)						H	7113	253	100	+	0	0	506I253M726I	R1006	Tetrasphaera_duodecadis_strain_IAM_14868_(NR_040880.1)
H	13206	253	99.6	+	0	0	518I253M719I	R1008	Massilia_namucuonensis_strain_333-1-0411_(NR_118215.1)						H	7113	253	100	+	0	0	506I253M726I	R1007	Tetrasphaera_duodecadis_strain_IAM_14868_(NR_040880.1)
H	13206	253	99.6	+	0	0	518I253M719I	R1010	Massilia_namucuonensis_strain_333-1-0411_(NR_118215.1)						H	7113	253	100	+	0	0	506I253M726I	R1008	Tetrasphaera_duodecadis_strain_IAM_14868_(NR_040880.1)
[truncated: 1,330 more rows]

## Sheet: Kelpie synonyms
Albidovulum_xiamenense_strain_YBY-7_(NR_118031.1)
[truncated: 24 more rows]

## Sheet: Comparisons
CAMI gold profile									16S reads		Extracted v4 region from contigs			Kelpie profile
[truncated: 34 more rows]

[truncated: 2 more sheets: Comparisons present, Identity]
