# Supplementary material for: Kelpie: generating full-length ‘amplicons’ from whole-metagenome datasets
Source: PeerJ. 2019 Jan 30;6:e6174. doi: 10.7717/peerj.6174 (PMC6359901; doi:10.7717/peerj.6174)
Supplement: Table S8 — Source spreadsheet for the CAMI Medium-derived tables and figures. [file peerj-07-6174-s008.xlsx]

## Sheet: CAMI profile
RANK	TAXPATHSN								PERCENTAGE
superkingdom	Archaea								0.7337		Archaea	Euryarchaeota	0.7337	0.7338	Archaea	Euryarchaeota	Halobacteria	0.3888	0.3888		Archaea	Euryarchaeota	Halobacteria	Halobacteriales	0.3888	0.3888		Archaea	Euryarchaeota	Halobacteria	Halobacteriales	Halobacteriaceae	0.3888	0.3888		Archaea	Euryarchaeota	Halobacteria	Halobacteriales	Halobacteriaceae	Halobacterium	0.3888	0.3888		Archaea	Euryarchaeota	Halobacteria	Halobacteriales	Halobacteriaceae
superkingdom	Viruses								15.9456						Archaea	Euryarchaeota	Thermoplasmata	0.345	0.345		Archaea	Euryarchaeota	Thermoplasmata	Thermoplasmatales	0.345	0.345
superkingdom	Bacteria								30.0233																			Archaea	Euryarchaeota	Thermoplasmata	Thermoplasmatales	Picrophilaceae	0.345	0.345		Archaea	Euryarchaeota	Thermoplasmata	Thermoplasmatales	Picrophilaceae	Picrophilus	0.345	0.345		Archaea	Euryarchaeota	Thermoplasmata	Thermoplasmatales	Picrophilaceae
phylum	Bacteria	Bacteroidetes							1.2506		Bacteria	Actinobacteria	5.7653	5.7653	Bacteria	Actinobacteria	Actinobacteria	5.7653	5.7653		Bacteria	Actinobacteria	Actinobacteria	Acidimicrobiales	0.1012	0.1012		Bacteria	Actinobacteria	Actinobacteria	Acidimicrobiales	Acidimicrobiaceae	0.1012	0.1012		Bacteria	Actinobacteria	Actinobacteria	Acidimicrobiales	Acidimicrobiaceae	Ferrithrix	0.1012	0.1012		Bacteria	Actinobacteria	Actinobacteria	Acidimicrobiales	Acidimicrobiaceae
phylum	Bacteria	Proteobacteria							15.8693												Bacteria	Actinobacteria	Actinobacteria	Actinomycetales	5.6641	5.6642		Bacteria	Actinobacteria	Actinobacteria	Actinomycetales	Cellulomonadaceae	1.8855	1.8855		Bacteria	Actinobacteria	Actinobacteria	Actinomycetales	Cellulomonadaceae	Cellulomonas	1.2453	1.2453		Bacteria	Actinobacteria	Actinobacteria	Actinomycetales	Cellulomonadaceae
phylum	Bacteria	Tenericutes							0.0846																																				Bacteria	Actinobacteria	Actinobacteria	Actinomycetales	Cellulomonadaceae
phylum	Bacteria	Firmicutes							7.0535
phylum	Bacteria	Actinobacteria							5.7653
phylum	Archaea	Euryarchaeota							0.7337
class	Archaea	Euryarchaeota	Thermoplasmata						0.345																											Bacteria	Actinobacteria	Actinobacteria	Actinomycetales	Cellulomonadaceae	Oerskovia	0.6402	0.6402		Bacteria	Actinobacteria	Actinobacteria	Actinomycetales	Cellulomonadaceae
class	Archaea	Euryarchaeota	Halobacteria						0.3888
class	Bacteria	Actinobacteria	Actinobacteria						5.7653																			Bacteria	Actinobacteria	Actinobacteria	Actinomycetales	Intrasporangiaceae	0.5194	0.5194		Bacteria	Actinobacteria	Actinobacteria	Actinomycetales	Intrasporangiaceae	Janibacter	0.346	0.346		Bacteria	Actinobacteria	Actinobacteria	Actinomycetales	Intrasporangiaceae
class	Bacteria	Bacteroidetes	Cytophagia						0.032																											Bacteria	Actinobacteria	Actinobacteria	Actinomycetales	Intrasporangiaceae	Phycicoccus	0.1734	0.1734		Bacteria	Actinobacteria	Actinobacteria	Actinomycetales	Intrasporangiaceae
class	Bacteria	Bacteroidetes	Flavobacteriia						0.9066
class	Bacteria	Bacteroidetes	Bacteroidia						0.0586																			Bacteria	Actinobacteria	Actinobacteria	Actinomycetales	Microbacteriaceae	0.2729	0.2729		Bacteria	Actinobacteria	Actinobacteria	Actinomycetales	Microbacteriaceae	Curtobacterium	0.0551	0.0551		Bacteria	Actinobacteria	Actinobacteria	Actinomycetales	Microbacteriaceae
class	Bacteria	Bacteroidetes	Sphingobacteriia						0.2534																											Bacteria	Actinobacteria	Actinobacteria	Actinomycetales	Microbacteriaceae	Microbacteriaceae_g	0.2178	0.2178		Bacteria	Actinobacteria	Actinobacteria	Actinomycetales	Microbacteriaceae
class	Bacteria	Firmicutes	Clostridia						5.8251																			Bacteria	Actinobacteria	Actinobacteria	Actinomycetales	Mycobacteriaceae	0.0451	0.0451		Bacteria	Actinobacteria	Actinobacteria	Actinomycetales	Mycobacteriaceae	Mycobacterium	0.0451	0.0451		Bacteria	Actinobacteria	Actinobacteria	Actinomycetales	Mycobacteriaceae
class	Bacteria	Firmicutes	Negativicutes						0.4647																			Bacteria	Actinobacteria	Actinobacteria	Actinomycetales	Nocardiaceae	1.4778	1.4778		Bacteria	Actinobacteria	Actinobacteria	Actinomycetales	Nocardiaceae	Nocardia	0.0994	0.0994		Bacteria	Actinobacteria	Actinobacteria	Actinomycetales	Nocardiaceae
class	Bacteria	Firmicutes	Bacilli						0.7638																											Bacteria	Actinobacteria	Actinobacteria	Actinomycetales	Nocardiaceae	Rhodococcus	1.3784	1.3784		Bacteria	Actinobacteria	Actinobacteria	Actinomycetales	Nocardiaceae
class	Bacteria	Proteobacteria	Gammaproteobacteria						1.301																			Bacteria	Actinobacteria	Actinobacteria	Actinomycetales	Nocardioidaceae	0.6385	0.6385		Bacteria	Actinobacteria	Actinobacteria	Actinomycetales	Nocardioidaceae	Aeromicrobium	0.6385	0.6385		Bacteria	Actinobacteria	Actinobacteria	Actinomycetales	Nocardioidaceae
class	Bacteria	Proteobacteria	Betaproteobacteria						2.7195
class	Bacteria	Proteobacteria	Deltaproteobacteria						1.8027
class	Bacteria	Proteobacteria	Alphaproteobacteria						10.0461																			Bacteria	Actinobacteria	Actinobacteria	Actinomycetales	Promicromonosporaceae	0.1023	0.1023		Bacteria	Actinobacteria	Actinobacteria	Actinomycetales	Promicromonosporaceae	Promicromonospora	0.1023	0.1023		Bacteria	Actinobacteria	Actinobacteria	Actinomycetales	Promicromonosporaceae
class	Bacteria	Tenericutes	Mollicutes						0.0846																			Bacteria	Actinobacteria	Actinobacteria	Actinomycetales	Propionibacteriaceae	0.0616	0.0616		Bacteria	Actinobacteria	Actinobacteria	Actinomycetales	Propionibacteriaceae	Tessaracoccus	0.0616	0.0616		Bacteria	Actinobacteria	Actinobacteria	Actinomycetales	Propionibacteriaceae
order	Bacteria	Actinobacteria	Actinobacteria	Acidimicrobiales					0.1012																											Bacteria	Actinobacteria	Actinobacteria	Actinomycetales	Pseudonocardiaceae	Kibdelosporangium	0.0862	0.0862		Bacteria	Actinobacteria	Actinobacteria	Actinomycetales	Pseudonocardiaceae
order	Bacteria	Actinobacteria	Actinobacteria	Actinomycetales					5.6641																			Bacteria	Actinobacteria	Actinobacteria	Actinomycetales	Pseudonocardiaceae	0.1723	0.1723		Bacteria	Actinobacteria	Actinobacteria	Actinomycetales	Pseudonocardiaceae	Lechevalieria	0.0861	0.0861		Bacteria	Actinobacteria	Actinobacteria	Actinomycetales	Pseudonocardiaceae
order	Bacteria	Bacteroidetes	Bacteroidia	Bacteroidales					0.0586																																				Bacteria	Actinobacteria	Actinobacteria	Actinomycetales	Pseudonocardiaceae
order	Bacteria	Bacteroidetes	Cytophagia	Cytophagales					0.032																			Bacteria	Actinobacteria	Actinobacteria	Actinomycetales	Streptomycetaceae	0.4888	0.4888		Bacteria	Actinobacteria	Actinobacteria	Actinomycetales	Streptomycetaceae	Streptomycetaceae_g	0.4888	0.4888		Bacteria	Actinobacteria	Actinobacteria	Actinomycetales	Streptomycetaceae
order	Bacteria	Bacteroidetes	Flavobacteriia	Flavobacteriales					0.9066
order	Bacteria	Bacteroidetes	Sphingobacteriia	Sphingobacteriales					0.2534		Bacteria	Bacteroidetes	1.2506	1.2506	Bacteria	Bacteroidetes	Bacteroidia	0.0586	0.0586		Bacteria	Bacteroidetes	Bacteroidia	Bacteroidales	0.0586	0.0586		Bacteria	Bacteroidetes	Bacteroidia	Bacteroidales	Porphyromonadaceae	0.0576	0.0576		Bacteria	Bacteroidetes	Bacteroidia	Bacteroidales	Porphyromonadaceae	Porphyromonas	0.0576	0.0576		Bacteria	Bacteroidetes	Bacteroidia	Bacteroidales	Porphyromonadaceae
order	Archaea	Euryarchaeota	Halobacteria	Halobacteriales					0.3888																			Bacteria	Bacteroidetes	Bacteroidia	Bacteroidales	Prevotellaceae	0.001	0.001		Bacteria	Bacteroidetes	Bacteroidia	Bacteroidales	Prevotellaceae	Prevotella	0.001	0.001		Bacteria	Bacteroidetes	Bacteroidia	Bacteroidales	Prevotellaceae
order	Archaea	Euryarchaeota	Thermoplasmata	Thermoplasmatales					0.345						Bacteria	Bacteroidetes	Cytophagia	0.032	0.032		Bacteria	Bacteroidetes	Cytophagia	Cytophagales	0.032	0.032		Bacteria	Bacteroidetes	Cytophagia	Cytophagales	Cytophagaceae	0.032	0.032		Bacteria	Bacteroidetes	Cytophagia	Cytophagales	Cytophagaceae	Ohtaekwangia	0.032	0.0319		Bacteria	Bacteroidetes	Cytophagia	Cytophagales	Cytophagaceae
order	Bacteria	Firmicutes	Bacilli	Bacillales					0.7017																																				Bacteria	Bacteroidetes	Cytophagia	Cytophagales	Cytophagaceae
order	Bacteria	Firmicutes	Bacilli	Lactobacillales					0.0621						Bacteria	Bacteroidetes	Flavobacteriia	0.9066	0.9066		Bacteria	Bacteroidetes	Flavobacteriia	Flavobacteriales	0.9066	0.9066		Bacteria	Bacteroidetes	Flavobacteriia	Flavobacteriales	Flavobacteriaceae	0.9066	0.9067		Bacteria	Bacteroidetes	Flavobacteriia	Flavobacteriales	Flavobacteriaceae	Chryseobacterium	0.0163	0.0163		Bacteria	Bacteroidetes	Flavobacteriia	Flavobacteriales	Flavobacteriaceae
order	Bacteria	Firmicutes	Clostridia	Clostridiales					2.6682																											Bacteria	Bacteroidetes	Flavobacteriia	Flavobacteriales	Flavobacteriaceae	Formosa	0.4701	0.4701		Bacteria	Bacteroidetes	Flavobacteriia	Flavobacteriales	Flavobacteriaceae
order	Bacteria	Firmicutes	Clostridia	Thermoanaerobacterales					3.1569																											Bacteria	Bacteroidetes	Flavobacteriia	Flavobacteriales	Flavobacteriaceae	Olleya	0.4203	0.4203		Bacteria	Bacteroidetes	Flavobacteriia	Flavobacteriales	Flavobacteriaceae
order	Bacteria	Firmicutes	Negativicutes	Selenomonadales					0.4647						Bacteria	Bacteroidetes	Sphingobacteriia	0.2534	0.2534		Bacteria	Bacteroidetes	Sphingobacteriia	Sphingobacteriales	0.2534	0.2534		Bacteria	Bacteroidetes	Sphingobacteriia	Sphingobacteriales	Sphingobacteriaceae	0.2534	0.2533		Bacteria	Bacteroidetes	Sphingobacteriia	Sphingobacteriales	Sphingobacteriaceae	Pedobacter	0.159	0.159		Bacteria	Bacteroidetes	Sphingobacteriia	Sphingobacteriales	Sphingobacteriaceae
order	Bacteria	Proteobacteria	Alphaproteobacteria	Caulobacterales					0.0553																																				Bacteria	Bacteroidetes	Sphingobacteriia	Sphingobacteriales	Sphingobacteriaceae
order	Bacteria	Proteobacteria	Alphaproteobacteria	Rhizobiales					5.5234																											Bacteria	Bacteroidetes	Sphingobacteriia	Sphingobacteriales	Sphingobacteriaceae	Sphingobacterium	0.0943	0.0943		Bacteria	Bacteroidetes	Sphingobacteriia	Sphingobacteriales	Sphingobacteriaceae
order	Bacteria	Proteobacteria	Alphaproteobacteria	Rhodobacterales					0.5397																																				Bacteria	Bacteroidetes	Sphingobacteriia	Sphingobacteriales	Sphingobacteriaceae
order	Bacteria	Proteobacteria	Alphaproteobacteria	Rhodospirillales					1.3444		Bacteria	Firmicutes	7.0535	7.0536	Bacteria	Firmicutes	Bacilli	0.7638	0.7638		Bacteria	Firmicutes	Bacilli	Bacillales	0.7017	0.7017		Bacteria	Firmicutes	Bacilli	Bacillales	Bacillales_f	0.4272	0.4272		Bacteria	Firmicutes	Bacilli	Bacillales	Bacillales_f	Bacillales_g	0.4272	0.4272		Bacteria	Firmicutes	Bacilli	Bacillales	Bacillales_f
order	Bacteria	Proteobacteria	Alphaproteobacteria	Sphingomonadales					2.5832
order	Bacteria	Proteobacteria	Betaproteobacteria	Burkholderiales					2.4516
order	Bacteria	Proteobacteria	Betaproteobacteria	Methylophilales					0.187																			Bacteria	Firmicutes	Bacilli	Bacillales	Bacillaceae	0.1055	0.1055		Bacteria	Firmicutes	Bacilli	Bacillales	Bacillaceae	Bacillus	0.1055	0.1055		Bacteria	Firmicutes	Bacilli	Bacillales	Bacillaceae
order	Bacteria	Proteobacteria	Betaproteobacteria	Neisseriales					0.0007																			Bacteria	Firmicutes	Bacilli	Bacillales	Paenibacillaceae	0.0114	0.0114		Bacteria	Firmicutes	Bacilli	Bacillales	Paenibacillaceae	Paenibacillus	0.0114	0.0114		Bacteria	Firmicutes	Bacilli	Bacillales	Paenibacillaceae
order	Bacteria	Proteobacteria	Betaproteobacteria	Nitrosomonadales					0.0801																			Bacteria	Firmicutes	Bacilli	Bacillales	Planococcaceae	0.1518	0.1518		Bacteria	Firmicutes	Bacilli	Bacillales	Planococcaceae	Sporosarcina	0.1518	0.1518		Bacteria	Firmicutes	Bacilli	Bacillales	Planococcaceae
order	Bacteria	Proteobacteria	Deltaproteobacteria	Desulfovibrionales					1.8027
order	Bacteria	Proteobacteria	Gammaproteobacteria	Alteromonadales					0.5545																			Bacteria	Firmicutes	Bacilli	Bacillales	Staphylococcaceae	0.0058	0.0058		Bacteria	Firmicutes	Bacilli	Bacillales	Staphylococcaceae	Salinicoccus	0.0058	0.0058		Bacteria	Firmicutes	Bacilli	Bacillales	Staphylococcaceae
order	Bacteria	Proteobacteria	Gammaproteobacteria	Enterobacteriales					0.2662												Bacteria	Firmicutes	Bacilli	Lactobacillales	0.0621	0.0621		Bacteria	Firmicutes	Bacilli	Lactobacillales	Enterococcaceae	0.0621	0.0621		Bacteria	Firmicutes	Bacilli	Lactobacillales	Enterococcaceae	Tetragenococcus	0.0621	0.0621		Bacteria	Firmicutes	Bacilli	Lactobacillales	Enterococcaceae
order	Bacteria	Proteobacteria	Gammaproteobacteria	Legionellales					0.1359						Bacteria	Firmicutes	Clostridia	5.8251	5.8251		Bacteria	Firmicutes	Clostridia	Clostridiales	2.6682	2.6682		Bacteria	Firmicutes	Clostridia	Clostridiales	Clostridiaceae	0.5051	0.5051		Bacteria	Firmicutes	Clostridia	Clostridiales	Clostridiaceae	Butyricicoccus	0.1262	0.1262		Bacteria	Firmicutes	Clostridia	Clostridiales	Clostridiaceae
order	Bacteria	Proteobacteria	Gammaproteobacteria	Pseudomonadales					0.2221																											Bacteria	Firmicutes	Clostridia	Clostridiales	Clostridiaceae	Caloranaerobacter	0.1202	0.1202		Bacteria	Firmicutes	Clostridia	Clostridiales	Clostridiaceae
order	Bacteria	Proteobacteria	Gammaproteobacteria	Vibrionales					0.1223																											Bacteria	Firmicutes	Clostridia	Clostridiales	Clostridiaceae	Caminicella	0.067	0.067		Bacteria	Firmicutes	Clostridia	Clostridiales	Clostridiaceae
order	Bacteria	Tenericutes	Mollicutes	Acholeplasmatales					0.0846																											Bacteria	Firmicutes	Clostridia	Clostridiales	Clostridiaceae	Clostridium	0.1798	0.1798		Bacteria	Firmicutes	Clostridia	Clostridiales	Clostridiaceae
family	Archaea	Euryarchaeota	Halobacteria	Halobacteriales	Halobacteriaceae				0.3888																																				Bacteria	Firmicutes	Clostridia	Clostridiales	Clostridiaceae
family	Archaea	Euryarchaeota	Thermoplasmata	Thermoplasmatales	Picrophilaceae				0.345																											Bacteria	Firmicutes	Clostridia	Clostridiales	Clostridiaceae	Lutispora	0.0119	0.0119		Bacteria	Firmicutes	Clostridia	Clostridiales	Clostridiaceae
family	Bacteria	Actinobacteria	Actinobacteria	Acidimicrobiales	Acidimicrobiaceae				0.1012																			Bacteria	Firmicutes	Clostridia	Clostridiales	Clostridiales Family XIX. Incertae Sedis	0.7181	0.7181		Bacteria	Firmicutes	Clostridia	Clostridiales	Clostridiales Family XIX. Incertae Sedis	Acetoanaerobium	0.7181	0.7181		Bacteria	Firmicutes	Clostridia	Clostridiales	Clostridiales Family XIX. Incertae Sedis
family	Bacteria	Actinobacteria	Actinobacteria	Actinomycetales	Cellulomonadaceae				1.8855
family	Bacteria	Actinobacteria	Actinobacteria	Actinomycetales	Intrasporangiaceae				0.5194
family	Bacteria	Actinobacteria	Actinobacteria	Actinomycetales	Microbacteriaceae				0.2729
family	Bacteria	Actinobacteria	Actinobacteria	Actinomycetales	Mycobacteriaceae				0.0451
family	Bacteria	Actinobacteria	Actinobacteria	Actinomycetales	Nocardiaceae				1.4778																			Bacteria	Firmicutes	Clostridia	Clostridiales	Clostridiales Family XVI. Incertae Sedis	0.932	0.932		Bacteria	Firmicutes	Clostridia	Clostridiales	Clostridiales Family XVI. Incertae Sedis	Carboxydocella	0.932	0.932		Bacteria	Firmicutes	Clostridia	Clostridiales	Clostridiales Family XVI. Incertae Sedis
family	Bacteria	Actinobacteria	Actinobacteria	Actinomycetales	Nocardioidaceae				0.6385
family	Bacteria	Actinobacteria	Actinobacteria	Actinomycetales	Promicromonosporaceae				0.1023
family	Bacteria	Actinobacteria	Actinobacteria	Actinomycetales	Propionibacteriaceae				0.0616
family	Bacteria	Actinobacteria	Actinobacteria	Actinomycetales	Pseudonocardiaceae				0.1723
family	Bacteria	Actinobacteria	Actinobacteria	Actinomycetales	Streptomycetaceae				0.4888
family	Bacteria	Bacteroidetes	Bacteroidia	Bacteroidales	Porphyromonadaceae				0.0576																			Bacteria	Firmicutes	Clostridia	Clostridiales	Eubacteriaceae	0.0063	0.0063		Bacteria	Firmicutes	Clostridia	Clostridiales	Eubacteriaceae	Garciella	0.0063	0.0063		Bacteria	Firmicutes	Clostridia	Clostridiales	Eubacteriaceae
family	Bacteria	Bacteroidetes	Bacteroidia	Bacteroidales	Prevotellaceae				0.001																			Bacteria	Firmicutes	Clostridia	Clostridiales	Lachnospiraceae	0.1158	0.1158		Bacteria	Firmicutes	Clostridia	Clostridiales	Lachnospiraceae	Butyrivibrio	0.1158	0.1158		Bacteria	Firmicutes	Clostridia	Clostridiales	Lachnospiraceae
family	Bacteria	Bacteroidetes	Cytophagia	Cytophagales	Cytophagaceae				0.032																																				Bacteria	Firmicutes	Clostridia	Clostridiales	Lachnospiraceae
family	Bacteria	Bacteroidetes	Flavobacteriia	Flavobacteriales	Flavobacteriaceae				0.9066																			Bacteria	Firmicutes	Clostridia	Clostridiales	Peptococcaceae	0.0662	0.0662		Bacteria	Firmicutes	Clostridia	Clostridiales	Peptococcaceae	Desulfotomaculum	0.0662	0.0662		Bacteria	Firmicutes	Clostridia	Clostridiales	Peptococcaceae
family	Bacteria	Bacteroidetes	Sphingobacteriia	Sphingobacteriales	Sphingobacteriaceae				0.2534																			Bacteria	Firmicutes	Clostridia	Clostridiales	Peptostreptococcaceae	0.3247	0.3247		Bacteria	Firmicutes	Clostridia	Clostridiales	Peptostreptococcaceae	Intestinibacter	0.0574	0.0574		Bacteria	Firmicutes	Clostridia	Clostridiales	Peptostreptococcaceae
family	Bacteria	Firmicutes	Bacilli	Bacillales	Bacillales_f				0.4272																											Bacteria	Firmicutes	Clostridia	Clostridiales	Peptostreptococcaceae	Peptoclostridium	0.0374	0.0374		Bacteria	Firmicutes	Clostridia	Clostridiales	Peptostreptococcaceae
family	Bacteria	Firmicutes	Bacilli	Bacillales	Bacillaceae				0.1055																											Bacteria	Firmicutes	Clostridia	Clostridiales	Peptostreptococcaceae	Tepidibacter	0.2299	0.2299		Bacteria	Firmicutes	Clostridia	Clostridiales	Peptostreptococcaceae
family	Bacteria	Firmicutes	Bacilli	Bacillales	Paenibacillaceae				0.0114												Bacteria	Firmicutes	Clostridia	Thermoanaerobacterales	3.1569	3.1569		Bacteria	Firmicutes	Clostridia	Thermoanaerobacterales	Thermoanaerobacteraceae	3.1569	3.1569		Bacteria	Firmicutes	Clostridia	Thermoanaerobacterales	Thermoanaerobacteraceae	Moorella	2.9071	2.9071		Bacteria	Firmicutes	Clostridia	Thermoanaerobacterales	Thermoanaerobacteraceae
family	Bacteria	Firmicutes	Bacilli	Bacillales	Planococcaceae				0.1518
family	Bacteria	Firmicutes	Bacilli	Bacillales	Staphylococcaceae				0.0058																											Bacteria	Firmicutes	Clostridia	Thermoanaerobacterales	Thermoanaerobacteraceae	Thermoanaerobacter	0.2498	0.2498		Bacteria	Firmicutes	Clostridia	Thermoanaerobacterales	Thermoanaerobacteraceae
family	Bacteria	Firmicutes	Bacilli	Lactobacillales	Enterococcaceae				0.0621
family	Bacteria	Firmicutes	Clostridia	Clostridiales	Clostridiaceae				0.5051						Bacteria	Firmicutes	Negativicutes	0.4647	0.4647		Bacteria	Firmicutes	Negativicutes	Selenomonadales	0.4647	0.4647		Bacteria	Firmicutes	Negativicutes	Selenomonadales	Veillonellaceae	0.4647	0.4647		Bacteria	Firmicutes	Negativicutes	Selenomonadales	Veillonellaceae	Propionispora	0.4647	0.4647		Bacteria	Firmicutes	Negativicutes	Selenomonadales	Veillonellaceae
family	Bacteria	Firmicutes	Clostridia	Clostridiales	Clostridiales Family XIX. Incertae Sedis				0.7181		Bacteria	Proteobacteria	15.8693	15.8693	Bacteria	Proteobacteria	Alphaproteobacteria	10.0461	10.046		Bacteria	Proteobacteria	Alphaproteobacteria	Caulobacterales	0.0553	0.0553		Bacteria	Proteobacteria	Alphaproteobacteria	Caulobacterales	Caulobacteraceae	0.0553	0.0553		Bacteria	Proteobacteria	Alphaproteobacteria	Caulobacterales	Caulobacteraceae	Phenylobacterium	0.0553	0.0553		Bacteria	Proteobacteria	Alphaproteobacteria	Caulobacterales	Caulobacteraceae
family	Bacteria	Firmicutes	Clostridia	Clostridiales	Clostridiales Family XVI. Incertae Sedis				0.932												Bacteria	Proteobacteria	Alphaproteobacteria	Rhizobiales	5.5234	5.5234		Bacteria	Proteobacteria	Alphaproteobacteria	Rhizobiales	Aurantimonadaceae	2.6739	2.6739		Bacteria	Proteobacteria	Alphaproteobacteria	Rhizobiales	Aurantimonadaceae	Aurantimonadaceae_g	2.6739	2.6739		Bacteria	Proteobacteria	Alphaproteobacteria	Rhizobiales	Aurantimonadaceae
family	Bacteria	Firmicutes	Clostridia	Clostridiales	Eubacteriaceae				0.0063
family	Bacteria	Firmicutes	Clostridia	Clostridiales	Lachnospiraceae				0.1158																			Bacteria	Proteobacteria	Alphaproteobacteria	Rhizobiales	Bradyrhizobiaceae	0.5798	0.5798		Bacteria	Proteobacteria	Alphaproteobacteria	Rhizobiales	Bradyrhizobiaceae	Bosea	0.5798	0.5798		Bacteria	Proteobacteria	Alphaproteobacteria	Rhizobiales	Bradyrhizobiaceae
family	Bacteria	Firmicutes	Clostridia	Clostridiales	Peptococcaceae				0.0662
family	Bacteria	Firmicutes	Clostridia	Clostridiales	Peptostreptococcaceae				0.3247																			Bacteria	Proteobacteria	Alphaproteobacteria	Rhizobiales	Phyllobacteriaceae	0.4637	0.4637		Bacteria	Proteobacteria	Alphaproteobacteria	Rhizobiales	Phyllobacteriaceae	Aquamicrobium	0.4637	0.4637		Bacteria	Proteobacteria	Alphaproteobacteria	Rhizobiales	Phyllobacteriaceae
family	Bacteria	Firmicutes	Clostridia	Thermoanaerobacterales	Thermoanaerobacteraceae				3.1569
family	Bacteria	Firmicutes	Negativicutes	Selenomonadales	Veillonellaceae				0.4647																			Bacteria	Proteobacteria	Alphaproteobacteria	Rhizobiales	Rhizobiaceae	1.7235	1.7235		Bacteria	Proteobacteria	Alphaproteobacteria	Rhizobiales	Rhizobiaceae	Rhizobium	0.0065	0.0065		Bacteria	Proteobacteria	Alphaproteobacteria	Rhizobiales	Rhizobiaceae
family	Bacteria	Proteobacteria	Alphaproteobacteria	Caulobacterales	Caulobacteraceae				0.0553																											Bacteria	Proteobacteria	Alphaproteobacteria	Rhizobiales	Rhizobiaceae	Sinorhizobium	1.717	1.717		Bacteria	Proteobacteria	Alphaproteobacteria	Rhizobiales	Rhizobiaceae
family	Bacteria	Proteobacteria	Alphaproteobacteria	Rhizobiales	Aurantimonadaceae				2.6739
family	Bacteria	Proteobacteria	Alphaproteobacteria	Rhizobiales	Bradyrhizobiaceae				0.5798																			Bacteria	Proteobacteria	Alphaproteobacteria	Rhizobiales	Xanthobacteraceae	0.0825	0.0825		Bacteria	Proteobacteria	Alphaproteobacteria	Rhizobiales	Xanthobacteraceae	Pseudoxanthobacter	0.0371	0.0371		Bacteria	Proteobacteria	Alphaproteobacteria	Rhizobiales	Xanthobacteraceae
family	Bacteria	Proteobacteria	Alphaproteobacteria	Rhizobiales	Phyllobacteriaceae				0.4637																											Bacteria	Proteobacteria	Alphaproteobacteria	Rhizobiales	Xanthobacteraceae	Xanthobacter	0.0454	0.0454		Bacteria	Proteobacteria	Alphaproteobacteria	Rhizobiales	Xanthobacteraceae
family	Bacteria	Proteobacteria	Alphaproteobacteria	Rhizobiales	Rhizobiaceae				1.7235												Bacteria	Proteobacteria	Alphaproteobacteria	Rhodobacterales	0.5397	0.5397		Bacteria	Proteobacteria	Alphaproteobacteria	Rhodobacterales	Rhodobacteraceae	0.5397	0.5397		Bacteria	Proteobacteria	Alphaproteobacteria	Rhodobacterales	Rhodobacteraceae	Paracoccus	0.0991	0.0991		Bacteria	Proteobacteria	Alphaproteobacteria	Rhodobacterales	Rhodobacteraceae
family	Bacteria	Proteobacteria	Alphaproteobacteria	Rhizobiales	Xanthobacteraceae				0.0825
family	Bacteria	Proteobacteria	Alphaproteobacteria	Rhodobacterales	Rhodobacteraceae				0.5397																											Bacteria	Proteobacteria	Alphaproteobacteria	Rhodobacterales	Rhodobacteraceae	Rhodobaca	0.0195	0.0195		Bacteria	Proteobacteria	Alphaproteobacteria	Rhodobacterales	Rhodobacteraceae
family	Bacteria	Proteobacteria	Alphaproteobacteria	Rhodospirillales	Rhodospirillaceae				1.3444																											Bacteria	Proteobacteria	Alphaproteobacteria	Rhodobacterales	Rhodobacteraceae	Rhodobacter	0.4078	0.4078		Bacteria	Proteobacteria	Alphaproteobacteria	Rhodobacterales	Rhodobacteraceae
family	Bacteria	Proteobacteria	Alphaproteobacteria	Sphingomonadales	Sphingomonadaceae				2.5832
family	Bacteria	Proteobacteria	Betaproteobacteria	Burkholderiales	Comamonadaceae				1.8772																											Bacteria	Proteobacteria	Alphaproteobacteria	Rhodobacterales	Rhodobacteraceae	Roseinatronobacter	0.0133	0.0133		Bacteria	Proteobacteria	Alphaproteobacteria	Rhodobacterales	Rhodobacteraceae
family	Bacteria	Proteobacteria	Betaproteobacteria	Burkholderiales	Oxalobacteraceae				0.5744												Bacteria	Proteobacteria	Alphaproteobacteria	Rhodospirillales	1.3444	1.3444		Bacteria	Proteobacteria	Alphaproteobacteria	Rhodospirillales	Rhodospirillaceae	1.3444	1.3444		Bacteria	Proteobacteria	Alphaproteobacteria	Rhodospirillales	Rhodospirillaceae	Azospirillum	0.695	0.695		Bacteria	Proteobacteria	Alphaproteobacteria	Rhodospirillales	Rhodospirillaceae
family	Bacteria	Proteobacteria	Betaproteobacteria	Methylophilales	Methylophilaceae				0.187																											Bacteria	Proteobacteria	Alphaproteobacteria	Rhodospirillales	Rhodospirillaceae	Phaeospirillum	0.6494	0.6494		Bacteria	Proteobacteria	Alphaproteobacteria	Rhodospirillales	Rhodospirillaceae
family	Bacteria	Proteobacteria	Betaproteobacteria	Neisseriales	Neisseriaceae				0.0007
family	Bacteria	Proteobacteria	Betaproteobacteria	Nitrosomonadales	Nitrosomonadaceae				0.0801
family	Bacteria	Proteobacteria	Deltaproteobacteria	Desulfovibrionales	Desulfovibrionaceae				1.8027
family	Bacteria	Proteobacteria	Gammaproteobacteria	Alteromonadales	Ferrimonadaceae				0.5545												Bacteria	Proteobacteria	Alphaproteobacteria	Sphingomonadales	2.5832	2.5832		Bacteria	Proteobacteria	Alphaproteobacteria	Sphingomonadales	Sphingomonadaceae	2.5832	2.5832		Bacteria	Proteobacteria	Alphaproteobacteria	Sphingomonadales	Sphingomonadaceae	Sphingomonas	2.5832	2.5832		Bacteria	Proteobacteria	Alphaproteobacteria	Sphingomonadales	Sphingomonadaceae
family	Bacteria	Proteobacteria	Gammaproteobacteria	Enterobacteriales	Enterobacteriaceae				0.2662																																				Bacteria	Proteobacteria	Alphaproteobacteria	Sphingomonadales	Sphingomonadaceae
family	Bacteria	Proteobacteria	Gammaproteobacteria	Legionellales	Legionellaceae				0.1359																																				Bacteria	Proteobacteria	Alphaproteobacteria	Sphingomonadales	Sphingomonadaceae
family	Bacteria	Proteobacteria	Gammaproteobacteria	Pseudomonadales	Pseudomonadaceae				0.2221
family	Bacteria	Proteobacteria	Gammaproteobacteria	Vibrionales	Vibrionaceae				0.1223
family	Bacteria	Tenericutes	Mollicutes	Acholeplasmatales	Acholeplasmataceae				0.0846						Bacteria	Proteobacteria	Betaproteobacteria	2.7195	2.7194		Bacteria	Proteobacteria	Betaproteobacteria	Burkholderiales	2.4516	2.4516		Bacteria	Proteobacteria	Betaproteobacteria	Burkholderiales	Comamonadaceae	1.8772	1.8772		Bacteria	Proteobacteria	Betaproteobacteria	Burkholderiales	Comamonadaceae	Diaphorobacter	0.251	0.251		Bacteria	Proteobacteria	Betaproteobacteria	Burkholderiales	Comamonadaceae
genus	Archaea	Euryarchaeota	Halobacteria	Halobacteriales	Halobacteriaceae	Halobacterium			0.3888																											Bacteria	Proteobacteria	Betaproteobacteria	Burkholderiales	Comamonadaceae	Comamonadaceae_g	1.6262	1.6262		Bacteria	Proteobacteria	Betaproteobacteria	Burkholderiales	Comamonadaceae
genus	Archaea	Euryarchaeota	Thermoplasmata	Thermoplasmatales	Picrophilaceae	Picrophilus			0.345
genus	Bacteria	Actinobacteria	Actinobacteria	Acidimicrobiales	Acidimicrobiaceae	Ferrithrix			0.1012
genus	Bacteria	Actinobacteria	Actinobacteria	Actinomycetales	Cellulomonadaceae	Cellulomonas			1.2453
genus	Bacteria	Actinobacteria	Actinobacteria	Actinomycetales	Cellulomonadaceae	Oerskovia			0.6402
genus	Bacteria	Actinobacteria	Actinobacteria	Actinomycetales	Intrasporangiaceae	Janibacter			0.346
genus	Bacteria	Actinobacteria	Actinobacteria	Actinomycetales	Intrasporangiaceae	Phycicoccus			0.1734																			Bacteria	Proteobacteria	Betaproteobacteria	Burkholderiales	Oxalobacteraceae	0.5744	0.5744		Bacteria	Proteobacteria	Betaproteobacteria	Burkholderiales	Oxalobacteraceae	Massilia	0.5744	0.5744		Bacteria	Proteobacteria	Betaproteobacteria	Burkholderiales	Oxalobacteraceae
genus	Bacteria	Actinobacteria	Actinobacteria	Actinomycetales	Microbacteriaceae	Curtobacterium			0.0551
genus	Bacteria	Actinobacteria	Actinobacteria	Actinomycetales	Microbacteriaceae	Microbacteriaceae_g			0.2178
genus	Bacteria	Actinobacteria	Actinobacteria	Actinomycetales	Mycobacteriaceae	Mycobacterium			0.0451
genus	Bacteria	Actinobacteria	Actinobacteria	Actinomycetales	Nocardiaceae	Nocardia			0.0994												Bacteria	Proteobacteria	Betaproteobacteria	Methylophilales	0.187	0.187		Bacteria	Proteobacteria	Betaproteobacteria	Methylophilales	Methylophilaceae	0.187	0.187		Bacteria	Proteobacteria	Betaproteobacteria	Methylophilales	Methylophilaceae	Methylophilus	0.187	0.187		Bacteria	Proteobacteria	Betaproteobacteria	Methylophilales	Methylophilaceae
genus	Bacteria	Actinobacteria	Actinobacteria	Actinomycetales	Nocardiaceae	Rhodococcus			1.3784
genus	Bacteria	Actinobacteria	Actinobacteria	Actinomycetales	Nocardioidaceae	Aeromicrobium			0.6385
genus	Bacteria	Actinobacteria	Actinobacteria	Actinomycetales	Promicromonosporaceae	Promicromonospora			0.1023												Bacteria	Proteobacteria	Betaproteobacteria	Neisseriales	0.0007	0.0007		Bacteria	Proteobacteria	Betaproteobacteria	Neisseriales	Neisseriaceae	0.0007	0.0007		Bacteria	Proteobacteria	Betaproteobacteria	Neisseriales	Neisseriaceae	Alysiella	0.0007	0.0007		Bacteria	Proteobacteria	Betaproteobacteria	Neisseriales	Neisseriaceae
genus	Bacteria	Actinobacteria	Actinobacteria	Actinomycetales	Propionibacteriaceae	Tessaracoccus			0.0616												Bacteria	Proteobacteria	Betaproteobacteria	Nitrosomonadales	0.0801	0.0801		Bacteria	Proteobacteria	Betaproteobacteria	Nitrosomonadales	Nitrosomonadaceae	0.0801	0.0801		Bacteria	Proteobacteria	Betaproteobacteria	Nitrosomonadales	Nitrosomonadaceae	Nitrosomonas	0.0801	0.0801		Bacteria	Proteobacteria	Betaproteobacteria	Nitrosomonadales	Nitrosomonadaceae
genus	Bacteria	Actinobacteria	Actinobacteria	Actinomycetales	Pseudonocardiaceae	Kibdelosporangium			0.0862						Bacteria	Proteobacteria	Deltaproteobacteria	1.8027	1.8027		Bacteria	Proteobacteria	Deltaproteobacteria	Desulfovibrionales	1.8027	1.8027		Bacteria	Proteobacteria	Deltaproteobacteria	Desulfovibrionales	Desulfovibrionaceae	1.8027	1.8027		Bacteria	Proteobacteria	Deltaproteobacteria	Desulfovibrionales	Desulfovibrionaceae	Desulfovibrio	1.8027	1.8027		Bacteria	Proteobacteria	Deltaproteobacteria	Desulfovibrionales	Desulfovibrionaceae
genus	Bacteria	Actinobacteria	Actinobacteria	Actinomycetales	Pseudonocardiaceae	Lechevalieria			0.0861																																				Bacteria	Proteobacteria	Deltaproteobacteria	Desulfovibrionales	Desulfovibrionaceae
genus	Bacteria	Actinobacteria	Actinobacteria	Actinomycetales	Streptomycetaceae	Streptomycetaceae_g			0.4888																																				Bacteria	Proteobacteria	Deltaproteobacteria	Desulfovibrionales	Desulfovibrionaceae
genus	Bacteria	Bacteroidetes	Bacteroidia	Bacteroidales	Porphyromonadaceae	Porphyromonas			0.0576						Bacteria	Proteobacteria	Gammaproteobacteria	1.301	1.301		Bacteria	Proteobacteria	Gammaproteobacteria	Alteromonadales	0.5545	0.5545		Bacteria	Proteobacteria	Gammaproteobacteria	Alteromonadales	Ferrimonadaceae	0.5545	0.5545		Bacteria	Proteobacteria	Gammaproteobacteria	Alteromonadales	Ferrimonadaceae	Ferrimonas	0.5545	0.5545		Bacteria	Proteobacteria	Gammaproteobacteria	Alteromonadales	Ferrimonadaceae
genus	Bacteria	Bacteroidetes	Bacteroidia	Bacteroidales	Prevotellaceae	Prevotella			0.001												Bacteria	Proteobacteria	Gammaproteobacteria	Enterobacteriales	0.2662	0.2662		Bacteria	Proteobacteria	Gammaproteobacteria	Enterobacteriales	Enterobacteriaceae	0.2662	0.2662		Bacteria	Proteobacteria	Gammaproteobacteria	Enterobacteriales	Enterobacteriaceae	Rahnella	0.2662	0.2662		Bacteria	Proteobacteria	Gammaproteobacteria	Enterobacteriales	Enterobacteriaceae
genus	Bacteria	Bacteroidetes	Cytophagia	Cytophagales	Cytophagaceae	Ohtaekwangia			0.032												Bacteria	Proteobacteria	Gammaproteobacteria	Legionellales	0.1359	0.1359		Bacteria	Proteobacteria	Gammaproteobacteria	Legionellales	Legionellaceae	0.1359	0.1359		Bacteria	Proteobacteria	Gammaproteobacteria	Legionellales	Legionellaceae	Tatlockia	0.1359	0.1359		Bacteria	Proteobacteria	Gammaproteobacteria	Legionellales	Legionellaceae
genus	Bacteria	Bacteroidetes	Flavobacteriia	Flavobacteriales	Flavobacteriaceae	Chryseobacterium			0.0163												Bacteria	Proteobacteria	Gammaproteobacteria	Pseudomonadales	0.2221	0.2221		Bacteria	Proteobacteria	Gammaproteobacteria	Pseudomonadales	Pseudomonadaceae	0.2221	0.2221		Bacteria	Proteobacteria	Gammaproteobacteria	Pseudomonadales	Pseudomonadaceae	Azotobacter	0.2221	0.2221		Bacteria	Proteobacteria	Gammaproteobacteria	Pseudomonadales	Pseudomonadaceae
genus	Bacteria	Bacteroidetes	Flavobacteriia	Flavobacteriales	Flavobacteriaceae	Formosa			0.4701												Bacteria	Proteobacteria	Gammaproteobacteria	Vibrionales	0.1223	0.1223		Bacteria	Proteobacteria	Gammaproteobacteria	Vibrionales	Vibrionaceae	0.1223	0.1223		Bacteria	Proteobacteria	Gammaproteobacteria	Vibrionales	Vibrionaceae	Vibrio	0.1223	0.1223		Bacteria	Proteobacteria	Gammaproteobacteria	Vibrionales	Vibrionaceae
genus	Bacteria	Bacteroidetes	Flavobacteriia	Flavobacteriales	Flavobacteriaceae	Olleya			0.4203																																				Bacteria	Proteobacteria	Gammaproteobacteria	Vibrionales	Vibrionaceae
genus	Bacteria	Bacteroidetes	Sphingobacteriia	Sphingobacteriales	Sphingobacteriaceae	Pedobacter			0.159		Bacteria	Tenericutes	0.0846	0.0846	Bacteria	Tenericutes	Mollicutes	0.0846	0.0846		Bacteria	Tenericutes	Mollicutes	Acholeplasmatales	0.0846	0.0846		Bacteria	Tenericutes	Mollicutes	Acholeplasmatales	Acholeplasmataceae	0.0846	0.0846		Bacteria	Tenericutes	Mollicutes	Acholeplasmatales	Acholeplasmataceae	Acholeplasma	0.0846	0.0846		Bacteria	Tenericutes	Mollicutes	Acholeplasmatales	Acholeplasmataceae
genus	Bacteria	Bacteroidetes	Sphingobacteriia	Sphingobacteriales	Sphingobacteriaceae	Sphingobacterium			0.0943
genus	Bacteria	Firmicutes	Bacilli	Bacillales	Bacillales_f	Bacillales_g			0.4272
genus	Bacteria	Firmicutes	Bacilli	Bacillales	Bacillaceae	Bacillus			0.1055				30.757	30.7572				30.7572	30.757						30.757	30.7571							30.7571	30.7571								30.7571	30.757
genus	Bacteria	Firmicutes	Bacilli	Bacillales	Paenibacillaceae	Paenibacillus			0.0114
genus	Bacteria	Firmicutes	Bacilli	Bacillales	Planococcaceae	Sporosarcina			0.1518
genus	Bacteria	Firmicutes	Bacilli	Bacillales	Staphylococcaceae	Salinicoccus			0.0058
genus	Bacteria	Firmicutes	Bacilli	Lactobacillales	Enterococcaceae	Tetragenococcus			0.0621
genus	Bacteria	Firmicutes	Clostridia	Clostridiales	Clostridiaceae	Butyricicoccus			0.1262
genus	Bacteria	Firmicutes	Clostridia	Clostridiales	Clostridiaceae	Caloranaerobacter			0.1202
genus	Bacteria	Firmicutes	Clostridia	Clostridiales	Clostridiaceae	Caminicella			0.067
genus	Bacteria	Firmicutes	Clostridia	Clostridiales	Clostridiaceae	Clostridium			0.1798
genus	Bacteria	Firmicutes	Clostridia	Clostridiales	Clostridiaceae	Lutispora			0.0119
genus	Bacteria	Firmicutes	Clostridia	Clostridiales	Clostridiales Family XIX. Incertae Sedis	Acetoanaerobium			0.7181
genus	Bacteria	Firmicutes	Clostridia	Clostridiales	Clostridiales Family XVI. Incertae Sedis	Carboxydocella			0.932
genus	Bacteria	Firmicutes	Clostridia	Clostridiales	Eubacteriaceae	Garciella			0.0063
genus	Bacteria	Firmicutes	Clostridia	Clostridiales	Lachnospiraceae	Butyrivibrio			0.1158
genus	Bacteria	Firmicutes	Clostridia	Clostridiales	Peptococcaceae	Desulfotomaculum			0.0662
genus	Bacteria	Firmicutes	Clostridia	Clostridiales	Peptostreptococcaceae	Intestinibacter			0.0574
genus	Bacteria	Firmicutes	Clostridia	Clostridiales	Peptostreptococcaceae	Peptoclostridium			0.0374
genus	Bacteria	Firmicutes	Clostridia	Clostridiales	Peptostreptococcaceae	Tepidibacter			0.2299
genus	Bacteria	Firmicutes	Clostridia	Thermoanaerobacterales	Thermoanaerobacteraceae	Moorella			2.9071
genus	Bacteria	Firmicutes	Clostridia	Thermoanaerobacterales	Thermoanaerobacteraceae	Thermoanaerobacter			0.2498
genus	Bacteria	Firmicutes	Negativicutes	Selenomonadales	Veillonellaceae	Propionispora			0.4647
genus	Bacteria	Proteobacteria	Alphaproteobacteria	Caulobacterales	Caulobacteraceae	Phenylobacterium			0.0553
genus	Bacteria	Proteobacteria	Alphaproteobacteria	Rhizobiales	Aurantimonadaceae	Aurantimonadaceae_g			2.6739
genus	Bacteria	Proteobacteria	Alphaproteobacteria	Rhizobiales	Bradyrhizobiaceae	Bosea			0.5798
genus	Bacteria	Proteobacteria	Alphaproteobacteria	Rhizobiales	Phyllobacteriaceae	Aquamicrobium			0.4637
genus	Bacteria	Proteobacteria	Alphaproteobacteria	Rhizobiales	Rhizobiaceae	Rhizobium			0.0065
genus	Bacteria	Proteobacteria	Alphaproteobacteria	Rhizobiales	Rhizobiaceae	Sinorhizobium			1.717
genus	Bacteria	Proteobacteria	Alphaproteobacteria	Rhizobiales	Xanthobacteraceae	Pseudoxanthobacter			0.0371
genus	Bacteria	Proteobacteria	Alphaproteobacteria	Rhizobiales	Xanthobacteraceae	Xanthobacter			0.0454
genus	Bacteria	Proteobacteria	Alphaproteobacteria	Rhodobacterales	Rhodobacteraceae	Paracoccus			0.0991
genus	Bacteria	Proteobacteria	Alphaproteobacteria	Rhodobacterales	Rhodobacteraceae	Rhodobaca			0.0195
genus	Bacteria	Proteobacteria	Alphaproteobacteria	Rhodobacterales	Rhodobacteraceae	Rhodobacter			0.4078
genus	Bacteria	Proteobacteria	Alphaproteobacteria	Rhodobacterales	Rhodobacteraceae	Roseinatronobacter			0.0133
genus	Bacteria	Proteobacteria	Alphaproteobacteria	Rhodospirillales	Rhodospirillaceae	Azospirillum			0.695
genus	Bacteria	Proteobacteria	Alphaproteobacteria	Rhodospirillales	Rhodospirillaceae	Phaeospirillum			0.6494
genus	Bacteria	Proteobacteria	Alphaproteobacteria	Sphingomonadales	Sphingomonadaceae	Sphingomonas			2.5832
genus	Bacteria	Proteobacteria	Betaproteobacteria	Burkholderiales	Comamonadaceae	Diaphorobacter			0.251
genus	Bacteria	Proteobacteria	Betaproteobacteria	Burkholderiales	Comamonadaceae	Comamonadaceae_g			1.6262
genus	Bacteria	Proteobacteria	Betaproteobacteria	Burkholderiales	Oxalobacteraceae	Massilia			0.5744
genus	Bacteria	Proteobacteria	Betaproteobacteria	Methylophilales	Methylophilaceae	Methylophilus			0.187
genus	Bacteria	Proteobacteria	Betaproteobacteria	Neisseriales	Neisseriaceae	Alysiella			0.0007
genus	Bacteria	Proteobacteria	Betaproteobacteria	Nitrosomonadales	Nitrosomonadaceae	Nitrosomonas			0.0801
genus	Bacteria	Proteobacteria	Deltaproteobacteria	Desulfovibrionales	Desulfovibrionaceae	Desulfovibrio			1.8027
genus	Bacteria	Proteobacteria	Gammaproteobacteria	Alteromonadales	Ferrimonadaceae	Ferrimonas			0.5545
genus	Bacteria	Proteobacteria	Gammaproteobacteria	Enterobacteriales	Enterobacteriaceae	Rahnella			0.2662
genus	Bacteria	Proteobacteria	Gammaproteobacteria	Legionellales	Legionellaceae	Tatlockia			0.1359
genus	Bacteria	Proteobacteria	Gammaproteobacteria	Pseudomonadales	Pseudomonadaceae	Azotobacter			0.2221
genus	Bacteria	Proteobacteria	Gammaproteobacteria	Vibrionales	Vibrionaceae	Vibrio			0.1223
genus	Bacteria	Tenericutes	Mollicutes	Acholeplasmatales	Acholeplasmataceae	Acholeplasma			0.0846
species	Archaea	Euryarchaeota	Halobacteria	Halobacteriales	Halobacteriaceae	Halobacterium	Halobacterium salinarum		0.3888
species	Archaea	Euryarchaeota	Thermoplasmata	Thermoplasmatales	Picrophilaceae	Picrophilus	Picrophilus oshimae		0.345
species	Bacteria	Actinobacteria	Actinobacteria	Acidimicrobiales	Acidimicrobiaceae	Ferrithrix	Ferrithrix thermotolerans		0.1012
species	Bacteria	Actinobacteria	Actinobacteria	Actinomycetales	Cellulomonadaceae	Cellulomonas	Cellulomonas terrae		0.0152
species	Bacteria	Actinobacteria	Actinobacteria	Actinomycetales	Cellulomonadaceae	Cellulomonas	Cellulomonas_sp		1.2301
species	Bacteria	Actinobacteria	Actinobacteria	Actinomycetales	Cellulomonadaceae	Oerskovia	Oerskovia_sp		0.6402
species	Bacteria	Actinobacteria	Actinobacteria	Actinomycetales	Intrasporangiaceae	Janibacter	Janibacter limosus		0.346
species	Bacteria	Actinobacteria	Actinobacteria	Actinomycetales	Intrasporangiaceae	Phycicoccus	Phycicoccus_sp		0.1734
species	Bacteria	Actinobacteria	Actinobacteria	Actinomycetales	Microbacteriaceae	Curtobacterium	Curtobacterium sp. B20		0.0551
species	Bacteria	Actinobacteria	Actinobacteria	Actinomycetales	Microbacteriaceae	Microbacteriaceae_g	Microbacteriaceae_sp		0.2178
species	Bacteria	Actinobacteria	Actinobacteria	Actinomycetales	Mycobacteriaceae	Mycobacterium	Mycobacterium_sp		0.0451
species	Bacteria	Actinobacteria	Actinobacteria	Actinomycetales	Nocardiaceae	Nocardia	Nocardia_g		0.0994
species	Bacteria	Actinobacteria	Actinobacteria	Actinomycetales	Nocardiaceae	Rhodococcus	Rhodococcus_sp		1.3784
species	Bacteria	Actinobacteria	Actinobacteria	Actinomycetales	Nocardioidaceae	Aeromicrobium	Aeromicrobium ponti		0.6385
species	Bacteria	Actinobacteria	Actinobacteria	Actinomycetales	Promicromonosporaceae	Promicromonospora	Promicromonospora umidemergens		0.1023
species	Bacteria	Actinobacteria	Actinobacteria	Actinomycetales	Propionibacteriaceae	Tessaracoccus	Tessaracoccus bendigoensis		0.0616
species	Bacteria	Actinobacteria	Actinobacteria	Actinomycetales	Pseudonocardiaceae	Kibdelosporangium	Kibdelosporangium aridum		0.0862
species	Bacteria	Actinobacteria	Actinobacteria	Actinomycetales	Pseudonocardiaceae	Lechevalieria	Lechevalieria aerocolonigenes		0.0167
species	Bacteria	Actinobacteria	Actinobacteria	Actinomycetales	Pseudonocardiaceae	Lechevalieria	Lechevalieria flava		0.0694
species	Bacteria	Actinobacteria	Actinobacteria	Actinomycetales	Streptomycetaceae	Streptomycetaceae_g	Streptomycetaceae_sp		0.4888
species	Bacteria	Bacteroidetes	Bacteroidia	Bacteroidales	Porphyromonadaceae	Porphyromonas	Porphyromonas crevioricanis		0.0576
species	Bacteria	Bacteroidetes	Bacteroidia	Bacteroidales	Prevotellaceae	Prevotella	Prevotella oulorum		0.001
species	Bacteria	Bacteroidetes	Cytophagia	Cytophagales	Cytophagaceae	Ohtaekwangia	Ohtaekwangia koreensis		0.0206
species	Bacteria	Bacteroidetes	Cytophagia	Cytophagales	Cytophagaceae	Ohtaekwangia	Ohtaekwangia kribbensis		0.0113
species	Bacteria	Bacteroidetes	Flavobacteriia	Flavobacteriales	Flavobacteriaceae	Chryseobacterium	Chryseobacterium_sp		0.0163
species	Bacteria	Bacteroidetes	Flavobacteriia	Flavobacteriales	Flavobacteriaceae	Formosa	Formosa spongicola		0.4701
species	Bacteria	Bacteroidetes	Flavobacteriia	Flavobacteriales	Flavobacteriaceae	Olleya	Olleya aquimaris		0.4203
species	Bacteria	Bacteroidetes	Sphingobacteriia	Sphingobacteriales	Sphingobacteriaceae	Pedobacter	Pedobacter agri		0.0706
species	Bacteria	Bacteroidetes	Sphingobacteriia	Sphingobacteriales	Sphingobacteriaceae	Pedobacter	Pedobacter_sp		0.0884
species	Bacteria	Bacteroidetes	Sphingobacteriia	Sphingobacteriales	Sphingobacteriaceae	Sphingobacterium	Sphingobacterium nematocida		0.0172
species	Bacteria	Bacteroidetes	Sphingobacteriia	Sphingobacteriales	Sphingobacteriaceae	Sphingobacterium	Sphingobacterium psychroaquaticum		0.0771
species	Bacteria	Firmicutes	Bacilli	Bacillales	Bacillales_f	Bacillales_g	Bacillales_sp		0.4272
species	Bacteria	Firmicutes	Bacilli	Bacillales	Bacillaceae	Bacillus	Bacillus coagulans		0.1055
species	Bacteria	Firmicutes	Bacilli	Bacillales	Paenibacillaceae	Paenibacillus	Paenibacillus frigoriresistens		0.0114
species	Bacteria	Firmicutes	Bacilli	Bacillales	Planococcaceae	Sporosarcina	Sporosarcina newyorkensis		0.1518
species	Bacteria	Firmicutes	Bacilli	Bacillales	Staphylococcaceae	Salinicoccus	Salinicoccus kunmingensis		0.0058
species	Bacteria	Firmicutes	Bacilli	Lactobacillales	Enterococcaceae	Tetragenococcus	Tetragenococcus halophilus		0.0621
species	Bacteria	Firmicutes	Clostridia	Clostridiales	Clostridiaceae	Butyricicoccus	Butyricicoccus pullicaecorum		0.1262
species	Bacteria	Firmicutes	Clostridia	Clostridiales	Clostridiaceae	Caloranaerobacter	Caloranaerobacter azorensis		0.1202
species	Bacteria	Firmicutes	Clostridia	Clostridiales	Clostridiaceae	Caminicella	Caminicella sporogenes		0.067
species	Bacteria	Firmicutes	Clostridia	Clostridiales	Clostridiaceae	Clostridium	Clostridium grantii		0.1126
species	Bacteria	Firmicutes	Clostridia	Clostridiales	Clostridiaceae	Clostridium	Clostridium tetani		0.0672
species	Bacteria	Firmicutes	Clostridia	Clostridiales	Clostridiaceae	Lutispora	Lutispora thermophila		0.0119
species	Bacteria	Firmicutes	Clostridia	Clostridiales	Clostridiales Family XIX. Incertae Sedis	Acetoanaerobium	Acetoanaerobium noterae		0.7181
species	Bacteria	Firmicutes	Clostridia	Clostridiales	Clostridiales Family XVI. Incertae Sedis	Carboxydocella	Carboxydocella sporoproducens		0.932
species	Bacteria	Firmicutes	Clostridia	Clostridiales	Eubacteriaceae	Garciella	Garciella nitratireducens		0.0063
species	Bacteria	Firmicutes	Clostridia	Clostridiales	Lachnospiraceae	Butyrivibrio	Butyrivibrio fibrisolvens		0.0619
species	Bacteria	Firmicutes	Clostridia	Clostridiales	Lachnospiraceae	Butyrivibrio	Butyrivibrio hungatei		0.0539
species	Bacteria	Firmicutes	Clostridia	Clostridiales	Peptococcaceae	Desulfotomaculum	Desulfotomaculum hydrothermale		0.0662
species	Bacteria	Firmicutes	Clostridia	Clostridiales	Peptostreptococcaceae	Intestinibacter	Intestinibacter bartlettii		0.0574
species	Bacteria	Firmicutes	Clostridia	Clostridiales	Peptostreptococcaceae	Peptoclostridium	[Eubacterium] yurii		0.0374
species	Bacteria	Firmicutes	Clostridia	Clostridiales	Peptostreptococcaceae	Tepidibacter	Tepidibacter thalassicus		0.2299
species	Bacteria	Firmicutes	Clostridia	Thermoanaerobacterales	Thermoanaerobacteraceae	Moorella	Moorella thermoacetica		2.9071
species	Bacteria	Firmicutes	Clostridia	Thermoanaerobacterales	Thermoanaerobacteraceae	Thermoanaerobacter	Thermoanaerobacter thermohydrosulfuricus		0.2498
species	Bacteria	Firmicutes	Negativicutes	Selenomonadales	Veillonellaceae	Propionispora	Propionispora hippei		0.4647
species	Bacteria	Proteobacteria	Alphaproteobacteria	Caulobacterales	Caulobacteraceae	Phenylobacterium	Phenylobacterium composti		0.0553
species	Bacteria	Proteobacteria	Alphaproteobacteria	Rhizobiales	Aurantimonadaceae	Aurantimonadaceae_g	Aurantimonadaceae_sp		2.6739
species	Bacteria	Proteobacteria	Alphaproteobacteria	Rhizobiales	Bradyrhizobiaceae	Bosea	Bosea_sp		0.5798
species	Bacteria	Proteobacteria	Alphaproteobacteria	Rhizobiales	Phyllobacteriaceae	Aquamicrobium	Aquamicrobium_sp		0.4637
species	Bacteria	Proteobacteria	Alphaproteobacteria	Rhizobiales	Rhizobiaceae	Rhizobium	Rhizobium_sp		0.0065
species	Bacteria	Proteobacteria	Alphaproteobacteria	Rhizobiales	Rhizobiaceae	Sinorhizobium	Sinorhizobium meliloti		1.717
species	Bacteria	Proteobacteria	Alphaproteobacteria	Rhizobiales	Xanthobacteraceae	Pseudoxanthobacter	Pseudoxanthobacter soli		0.0371
species	Bacteria	Proteobacteria	Alphaproteobacteria	Rhizobiales	Xanthobacteraceae	Xanthobacter	Xanthobacter autotrophicus		0.0454
species	Bacteria	Proteobacteria	Alphaproteobacteria	Rhodobacterales	Rhodobacteraceae	Paracoccus	Paracoccus pantotrophus		0.0991
species	Bacteria	Proteobacteria	Alphaproteobacteria	Rhodobacterales	Rhodobacteraceae	Rhodobaca	Rhodobaca barguzinensis		0.0195
species	Bacteria	Proteobacteria	Alphaproteobacteria	Rhodobacterales	Rhodobacteraceae	Rhodobacter	Rhodobacter capsulatus		0.4078
species	Bacteria	Proteobacteria	Alphaproteobacteria	Rhodobacterales	Rhodobacteraceae	Roseinatronobacter	Roseinatronobacter thiooxidans		0.0133
species	Bacteria	Proteobacteria	Alphaproteobacteria	Rhodospirillales	Rhodospirillaceae	Azospirillum	Azospirillum brasilense		0.695
species	Bacteria	Proteobacteria	Alphaproteobacteria	Rhodospirillales	Rhodospirillaceae	Phaeospirillum	Phaeospirillum fulvum		0.6494
species	Bacteria	Proteobacteria	Alphaproteobacteria	Sphingomonadales	Sphingomonadaceae	Sphingomonas	Sphingomonas aestuarii		2.0693
species	Bacteria	Proteobacteria	Alphaproteobacteria	Sphingomonadales	Sphingomonadaceae	Sphingomonas	Sphingomonas phyllosphaerae		0.2198
species	Bacteria	Proteobacteria	Alphaproteobacteria	Sphingomonadales	Sphingomonadaceae	Sphingomonas	Sphingomonas_sp		0.2941
species	Bacteria	Proteobacteria	Betaproteobacteria	Burkholderiales	Comamonadaceae	Diaphorobacter	Diaphorobacter oryzae		0.251
species	Bacteria	Proteobacteria	Betaproteobacteria	Burkholderiales	Comamonadaceae	Comamonadaceae_g	Comamonadaceae_sp		1.6262
species	Bacteria	Proteobacteria	Betaproteobacteria	Burkholderiales	Oxalobacteraceae	Massilia	uncultured Massilia sp.		0.5744
species	Bacteria	Proteobacteria	Betaproteobacteria	Methylophilales	Methylophilaceae	Methylophilus	Methylophilus_sp		0.187
species	Bacteria	Proteobacteria	Betaproteobacteria	Neisseriales	Neisseriaceae	Alysiella	Alysiella filiformis		0.0007
species	Bacteria	Proteobacteria	Betaproteobacteria	Nitrosomonadales	Nitrosomonadaceae	Nitrosomonas	Nitrosomonas europaea		0.0801
species	Bacteria	Proteobacteria	Deltaproteobacteria	Desulfovibrionales	Desulfovibrionaceae	Desulfovibrio	Desulfovibrio alkalitolerans		0.2921
species	Bacteria	Proteobacteria	Deltaproteobacteria	Desulfovibrionales	Desulfovibrionaceae	Desulfovibrio	Desulfovibrio bizertensis		1.5012
species	Bacteria	Proteobacteria	Deltaproteobacteria	Desulfovibrionales	Desulfovibrionaceae	Desulfovibrio	Desulfovibrio vietnamensis		0.0094
species	Bacteria	Proteobacteria	Gammaproteobacteria	Alteromonadales	Ferrimonadaceae	Ferrimonas	Ferrimonas marina		0.5545
species	Bacteria	Proteobacteria	Gammaproteobacteria	Enterobacteriales	Enterobacteriaceae	Rahnella	Rahnella aquatilis		0.2662
species	Bacteria	Proteobacteria	Gammaproteobacteria	Legionellales	Legionellaceae	Tatlockia	Legionella maceachernii		0.1359
species	Bacteria	Proteobacteria	Gammaproteobacteria	Pseudomonadales	Pseudomonadaceae	Azotobacter	Azotobacter vinelandii		0.2221
species	Bacteria	Proteobacteria	Gammaproteobacteria	Vibrionales	Vibrionaceae	Vibrio	Vibrio cincinnatiensis		0.0731
species	Bacteria	Proteobacteria	Gammaproteobacteria	Vibrionales	Vibrionaceae	Vibrio	Vibrio gazogenes		0.0492
species	Bacteria	Tenericutes	Mollicutes	Acholeplasmatales	Acholeplasmataceae	Acholeplasma	Acholeplasma oculi		0.0846
species							unidentified		25.9644
species							unidentified plasmid		27.333
strain	Archaea	Euryarchaeota	Halobacteria	Halobacteriales	Halobacteriaceae	Halobacterium	Halobacterium salinarum	Halobacterium salinarum strain	0.1472
strain	Archaea	Euryarchaeota	Halobacteria	Halobacteriales	Halobacteriaceae	Halobacterium	Halobacterium salinarum	Halobacterium salinarum strain	0.2416
strain	Archaea	Euryarchaeota	Thermoplasmata	Thermoplasmatales	Picrophilaceae	Picrophilus	Picrophilus oshimae	Picrophilus oshimae DSM 9789 strain	0.345
strain	Bacteria	Actinobacteria	Actinobacteria	Acidimicrobiales	Acidimicrobiaceae	Ferrithrix	Ferrithrix thermotolerans	Ferrithrix thermotolerans DSM 19514 strain	0.1012
strain	Bacteria	Actinobacteria	Actinobacteria	Actinomycetales	Cellulomonadaceae	Cellulomonas	Cellulomonas terrae	Cellulomonas terrae strain	0.0152
strain	Bacteria	Actinobacteria	Actinobacteria	Actinomycetales	Cellulomonadaceae	Cellulomonas		Cellulomonas strain	0.2706
strain	Bacteria	Actinobacteria	Actinobacteria	Actinomycetales	Cellulomonadaceae	Cellulomonas		Cellulomonas strain	0.6133
strain	Bacteria	Actinobacteria	Actinobacteria	Actinomycetales	Cellulomonadaceae	Cellulomonas		Cellulomonas strain	0.2409
strain	Bacteria	Actinobacteria	Actinobacteria	Actinomycetales	Cellulomonadaceae	Cellulomonas		Cellulomonas strain	0.1053
strain	Bacteria	Actinobacteria	Actinobacteria	Actinomycetales	Cellulomonadaceae	Oerskovia		Oerskovia strain	0.1009
strain	Bacteria	Actinobacteria	Actinobacteria	Actinomycetales	Cellulomonadaceae	Oerskovia		Oerskovia strain	0.5393
strain	Bacteria	Actinobacteria	Actinobacteria	Actinomycetales	Intrasporangiaceae	Janibacter	Janibacter limosus	Janibacter limosus strain	0.346
strain	Bacteria	Actinobacteria	Actinobacteria	Actinomycetales	Intrasporangiaceae	Phycicoccus		Phycicoccus strain	0.0908
strain	Bacteria	Actinobacteria	Actinobacteria	Actinomycetales	Intrasporangiaceae	Phycicoccus		Phycicoccus strain	0.0825
strain	Bacteria	Actinobacteria	Actinobacteria	Actinomycetales	Microbacteriaceae	Curtobacterium	Curtobacterium sp. B20	Curtobacterium sp. B20 strain	0.0551
strain	Bacteria	Actinobacteria	Actinobacteria	Actinomycetales	Microbacteriaceae			Microbacteriaceae strain	0.2178
strain	Bacteria	Actinobacteria	Actinobacteria	Actinomycetales	Mycobacteriaceae	Mycobacterium		Mycobacterium strain	0.0451
strain	Bacteria	Actinobacteria	Actinobacteria	Actinomycetales	Nocardiaceae	Nocardia		Nocardia strain	0.0994
strain	Bacteria	Actinobacteria	Actinobacteria	Actinomycetales	Nocardiaceae	Rhodococcus		Rhodococcus strain	1.3784
strain	Bacteria	Actinobacteria	Actinobacteria	Actinomycetales	Nocardioidaceae	Aeromicrobium	Aeromicrobium ponti	Aeromicrobium ponti strain	0.1465
strain	Bacteria	Actinobacteria	Actinobacteria	Actinomycetales	Nocardioidaceae	Aeromicrobium	Aeromicrobium ponti	Aeromicrobium ponti strain	0.1782
strain	Bacteria	Actinobacteria	Actinobacteria	Actinomycetales	Nocardioidaceae	Aeromicrobium	Aeromicrobium ponti	Aeromicrobium ponti strain	0.3138
strain	Bacteria	Actinobacteria	Actinobacteria	Actinomycetales	Promicromonosporaceae	Promicromonospora	Promicromonospora umidemergens	Promicromonospora umidemergens strain	0.1023
strain	Bacteria	Actinobacteria	Actinobacteria	Actinomycetales	Propionibacteriaceae	Tessaracoccus	Tessaracoccus bendigoensis	Tessaracoccus bendigoensis DSM 12906 strain	0.0616
strain	Bacteria	Actinobacteria	Actinobacteria	Actinomycetales	Pseudonocardiaceae	Kibdelosporangium	Kibdelosporangium aridum	Kibdelosporangium aridum strain	0.0862
strain	Bacteria	Actinobacteria	Actinobacteria	Actinomycetales	Pseudonocardiaceae	Lechevalieria	Lechevalieria aerocolonigenes	Lechevalieria aerocolonigenes strain	0.0167
strain	Bacteria	Actinobacteria	Actinobacteria	Actinomycetales	Pseudonocardiaceae	Lechevalieria	Lechevalieria flava	Lechevalieria flava strain	0.0694
strain	Bacteria	Actinobacteria	Actinobacteria	Actinomycetales	Streptomycetaceae			Streptomycetaceae strain	0.4554
strain	Bacteria	Actinobacteria	Actinobacteria	Actinomycetales	Streptomycetaceae			Streptomycetaceae strain	0.0334
strain	Bacteria	Bacteroidetes	Bacteroidia	Bacteroidales	Porphyromonadaceae	Porphyromonas	Porphyromonas crevioricanis	Porphyromonas crevioricanis strain	0.0576
strain	Bacteria	Bacteroidetes	Bacteroidia	Bacteroidales	Prevotellaceae	Prevotella	Prevotella oulorum	Prevotella oulorum strain	0.001
strain	Bacteria	Bacteroidetes	Cytophagia	Cytophagales	Cytophagaceae	Ohtaekwangia	Ohtaekwangia koreensis	Ohtaekwangia koreensis strain	0.0206
strain	Bacteria	Bacteroidetes	Cytophagia	Cytophagales	Cytophagaceae	Ohtaekwangia	Ohtaekwangia kribbensis	Ohtaekwangia kribbensis strain	0.0113
strain	Bacteria	Bacteroidetes	Flavobacteriia	Flavobacteriales	Flavobacteriaceae	Chryseobacterium		Chryseobacterium strain	0.0163
strain	Bacteria	Bacteroidetes	Flavobacteriia	Flavobacteriales	Flavobacteriaceae	Formosa	Formosa spongicola	Formosa spongicola strain	0.4701
strain	Bacteria	Bacteroidetes	Flavobacteriia	Flavobacteriales	Flavobacteriaceae	Olleya	Olleya aquimaris	Olleya aquimaris strain	0.4203
strain	Bacteria	Bacteroidetes	Sphingobacteriia	Sphingobacteriales	Sphingobacteriaceae	Pedobacter	Pedobacter agri	Pedobacter agri strain	0.0706
strain	Bacteria	Bacteroidetes	Sphingobacteriia	Sphingobacteriales	Sphingobacteriaceae	Pedobacter		Pedobacter strain	0.0884
strain	Bacteria	Bacteroidetes	Sphingobacteriia	Sphingobacteriales	Sphingobacteriaceae	Sphingobacterium	Sphingobacterium nematocida	Sphingobacterium nematocida strain	0.0172
strain	Bacteria	Bacteroidetes	Sphingobacteriia	Sphingobacteriales	Sphingobacteriaceae	Sphingobacterium	Sphingobacterium psychroaquaticum	Sphingobacterium psychroaquaticum strain	0.0771
strain	Bacteria	Firmicutes	Bacilli	Bacillales	Bacillaceae	Bacillus	Bacillus coagulans	Bacillus coagulans DSM 1 = ATCC 7050 strain	0.1055
strain	Bacteria	Firmicutes	Bacilli	Bacillales	Paenibacillaceae	Paenibacillus	Paenibacillus frigoriresistens	Paenibacillus frigoriresistens strain	0.0114
strain	Bacteria	Firmicutes	Bacilli	Bacillales	Planococcaceae	Sporosarcina	Sporosarcina newyorkensis	Sporosarcina newyorkensis strain	0.0534
strain	Bacteria	Firmicutes	Bacilli	Bacillales	Planococcaceae	Sporosarcina	Sporosarcina newyorkensis	Sporosarcina newyorkensis strain	0.0985
strain	Bacteria	Firmicutes	Bacilli	Bacillales	Staphylococcaceae	Salinicoccus	Salinicoccus kunmingensis	Salinicoccus kunmingensis DSM 17847 strain	0.0058
strain	Bacteria	Firmicutes	Bacilli	Bacillales				Bacillales strain	0.044
strain	Bacteria	Firmicutes	Bacilli	Bacillales				Bacillales strain	0.3296
strain	Bacteria	Firmicutes	Bacilli	Bacillales				Bacillales strain	0.0535
strain	Bacteria	Firmicutes	Bacilli	Lactobacillales	Enterococcaceae	Tetragenococcus	Tetragenococcus halophilus	Tetragenococcus halophilus subsp. halophilus DSM 20339 strain	0.0621
strain	Bacteria	Firmicutes	Clostridia	Clostridiales	Clostridiaceae	Butyricicoccus	Butyricicoccus pullicaecorum	Butyricicoccus pullicaecorum DSM 23266 strain	0.1262
strain	Bacteria	Firmicutes	Clostridia	Clostridiales	Clostridiaceae	Caloranaerobacter	Caloranaerobacter azorensis	Caloranaerobacter azorensis DSM 13643 strain	0.1202
strain	Bacteria	Firmicutes	Clostridia	Clostridiales	Clostridiaceae	Caminicella	Caminicella sporogenes	Caminicella sporogenes DSM 14501 strain	0.067
strain	Bacteria	Firmicutes	Clostridia	Clostridiales	Clostridiaceae	Clostridium	Clostridium grantii	Clostridium grantii DSM 8605 strain	0.1126
strain	Bacteria	Firmicutes	Clostridia	Clostridiales	Clostridiaceae	Clostridium	Clostridium tetani	Clostridium tetani strain	0.0672
strain	Bacteria	Firmicutes	Clostridia	Clostridiales	Clostridiaceae	Lutispora	Lutispora thermophila	Lutispora thermophila DSM 19022 strain	0.0119
strain	Bacteria	Firmicutes	Clostridia	Clostridiales	Clostridiales Family XIX. Incertae Sedis	Acetoanaerobium	Acetoanaerobium noterae	Acetoanaerobium noterae strain	0.0246
strain	Bacteria	Firmicutes	Clostridia	Clostridiales	Clostridiales Family XIX. Incertae Sedis	Acetoanaerobium	Acetoanaerobium noterae	Acetoanaerobium noterae strain	0.3687
strain	Bacteria	Firmicutes	Clostridia	Clostridiales	Clostridiales Family XIX. Incertae Sedis	Acetoanaerobium	Acetoanaerobium noterae	Acetoanaerobium noterae strain	0.1018
strain	Bacteria	Firmicutes	Clostridia	Clostridiales	Clostridiales Family XIX. Incertae Sedis	Acetoanaerobium	Acetoanaerobium noterae	Acetoanaerobium noterae strain	0.1305
strain	Bacteria	Firmicutes	Clostridia	Clostridiales	Clostridiales Family XIX. Incertae Sedis	Acetoanaerobium	Acetoanaerobium noterae	Acetoanaerobium noterae strain	0.0925
strain	Bacteria	Firmicutes	Clostridia	Clostridiales	Clostridiales Family XVI. Incertae Sedis	Carboxydocella	Carboxydocella sporoproducens	Carboxydocella sporoproducens DSM 16521 strain	0.1875
strain	Bacteria	Firmicutes	Clostridia	Clostridiales	Clostridiales Family XVI. Incertae Sedis	Carboxydocella	Carboxydocella sporoproducens	Carboxydocella sporoproducens DSM 16521 strain	0.3087
strain	Bacteria	Firmicutes	Clostridia	Clostridiales	Clostridiales Family XVI. Incertae Sedis	Carboxydocella	Carboxydocella sporoproducens	Carboxydocella sporoproducens DSM 16521 strain	0.1601
strain	Bacteria	Firmicutes	Clostridia	Clostridiales	Clostridiales Family XVI. Incertae Sedis	Carboxydocella	Carboxydocella sporoproducens	Carboxydocella sporoproducens DSM 16521 strain	0.1066
strain	Bacteria	Firmicutes	Clostridia	Clostridiales	Clostridiales Family XVI. Incertae Sedis	Carboxydocella	Carboxydocella sporoproducens	Carboxydocella sporoproducens DSM 16521 strain	0.1336
strain	Bacteria	Firmicutes	Clostridia	Clostridiales	Clostridiales Family XVI. Incertae Sedis	Carboxydocella	Carboxydocella sporoproducens	Carboxydocella sporoproducens DSM 16521 strain	0.0355
strain	Bacteria	Firmicutes	Clostridia	Clostridiales	Eubacteriaceae	Garciella	Garciella nitratireducens	Garciella nitratireducens DSM 15102 strain	0.0063
strain	Bacteria	Firmicutes	Clostridia	Clostridiales	Lachnospiraceae	Butyrivibrio	Butyrivibrio fibrisolvens	Butyrivibrio fibrisolvens DSM 3071 strain	0.0619
strain	Bacteria	Firmicutes	Clostridia	Clostridiales	Lachnospiraceae	Butyrivibrio	Butyrivibrio hungatei	Butyrivibrio hungatei DSM 14810 strain	0.0539
strain	Bacteria	Firmicutes	Clostridia	Clostridiales	Peptococcaceae	Desulfotomaculum	Desulfotomaculum hydrothermale	Desulfotomaculum hydrothermale Lam5 = DSM 18033 strain	0.0662
strain	Bacteria	Firmicutes	Clostridia	Clostridiales	Peptostreptococcaceae	Intestinibacter	Intestinibacter bartlettii	Intestinibacter bartlettii DSM 16795 strain	0.0574
strain	Bacteria	Firmicutes	Clostridia	Clostridiales	Peptostreptococcaceae	Peptoclostridium	[Eubacterium] yurii	[Eubacterium] yurii strain	0.0374
strain	Bacteria	Firmicutes	Clostridia	Clostridiales	Peptostreptococcaceae	Tepidibacter	Tepidibacter thalassicus	Tepidibacter thalassicus DSM 15285 strain	0.2299
strain	Bacteria	Firmicutes	Clostridia	Thermoanaerobacterales	Thermoanaerobacteraceae	Moorella	Moorella thermoacetica	Moorella thermoacetica strain	0.035
strain	Bacteria	Firmicutes	Clostridia	Thermoanaerobacterales	Thermoanaerobacteraceae	Moorella	Moorella thermoacetica	Moorella thermoacetica strain	2.8721
strain	Bacteria	Firmicutes	Clostridia	Thermoanaerobacterales	Thermoanaerobacteraceae	Thermoanaerobacter	Thermoanaerobacter thermohydrosulfuricus	Thermoanaerobacter thermohydrosulfuricus strain	0.2392
strain	Bacteria	Firmicutes	Clostridia	Thermoanaerobacterales	Thermoanaerobacteraceae	Thermoanaerobacter	Thermoanaerobacter thermohydrosulfuricus	Thermoanaerobacter thermohydrosulfuricus strain	0.0106
strain	Bacteria	Firmicutes	Negativicutes	Selenomonadales	Veillonellaceae	Propionispora	Propionispora hippei	Propionispora hippei DSM 15287 strain	0.4647
strain	Bacteria	Proteobacteria	Alphaproteobacteria	Caulobacterales	Caulobacteraceae	Phenylobacterium	Phenylobacterium composti	Phenylobacterium composti DSM 19425 strain	0.0553
strain	Bacteria	Proteobacteria	Alphaproteobacteria	Rhizobiales	Aurantimonadaceae			Aurantimonadaceae strain	2.6028
strain	Bacteria	Proteobacteria	Alphaproteobacteria	Rhizobiales	Aurantimonadaceae			Aurantimonadaceae strain	0.0711
strain	Bacteria	Proteobacteria	Alphaproteobacteria	Rhizobiales	Bradyrhizobiaceae	Bosea		Bosea strain	0.5735
strain	Bacteria	Proteobacteria	Alphaproteobacteria	Rhizobiales	Bradyrhizobiaceae	Bosea		Bosea strain	0.0063
strain	Bacteria	Proteobacteria	Alphaproteobacteria	Rhizobiales	Phyllobacteriaceae	Aquamicrobium		Aquamicrobium strain	0.0114
strain	Bacteria	Proteobacteria	Alphaproteobacteria	Rhizobiales	Phyllobacteriaceae	Aquamicrobium		Aquamicrobium strain	0.4523
strain	Bacteria	Proteobacteria	Alphaproteobacteria	Rhizobiales	Rhizobiaceae	Rhizobium		Rhizobium strain	0.0065
strain	Bacteria	Proteobacteria	Alphaproteobacteria	Rhizobiales	Rhizobiaceae	Sinorhizobium	Sinorhizobium meliloti	Sinorhizobium meliloti strain	0.2128
strain	Bacteria	Proteobacteria	Alphaproteobacteria	Rhizobiales	Rhizobiaceae	Sinorhizobium	Sinorhizobium meliloti	Sinorhizobium meliloti strain	1.5042
strain	Bacteria	Proteobacteria	Alphaproteobacteria	Rhizobiales	Xanthobacteraceae	Pseudoxanthobacter	Pseudoxanthobacter soli	Pseudoxanthobacter soli DSM 19599 strain	0.0371
strain	Bacteria	Proteobacteria	Alphaproteobacteria	Rhizobiales	Xanthobacteraceae	Xanthobacter	Xanthobacter autotrophicus	Xanthobacter autotrophicus strain	0.0454
strain	Bacteria	Proteobacteria	Alphaproteobacteria	Rhodobacterales	Rhodobacteraceae	Paracoccus	Paracoccus pantotrophus	Paracoccus pantotrophus strain	0.0153
strain	Bacteria	Proteobacteria	Alphaproteobacteria	Rhodobacterales	Rhodobacteraceae	Paracoccus	Paracoccus pantotrophus	Paracoccus pantotrophus strain	0.0838
strain	Bacteria	Proteobacteria	Alphaproteobacteria	Rhodobacterales	Rhodobacteraceae	Rhodobaca	Rhodobaca barguzinensis	Rhodobaca barguzinensis strain	0.0195
strain	Bacteria	Proteobacteria	Alphaproteobacteria	Rhodobacterales	Rhodobacteraceae	Rhodobacter	Rhodobacter capsulatus	Rhodobacter capsulatus strain	0.3212
strain	Bacteria	Proteobacteria	Alphaproteobacteria	Rhodobacterales	Rhodobacteraceae	Rhodobacter	Rhodobacter capsulatus	Rhodobacter capsulatus strain	0.0866
strain	Bacteria	Proteobacteria	Alphaproteobacteria	Rhodobacterales	Rhodobacteraceae	Roseinatronobacter	Roseinatronobacter thiooxidans	Roseinatronobacter thiooxidans strain	0.0133
strain	Bacteria	Proteobacteria	Alphaproteobacteria	Rhodospirillales	Rhodospirillaceae	Azospirillum	Azospirillum brasilense	Azospirillum brasilense strain	0.695
strain	Bacteria	Proteobacteria	Alphaproteobacteria	Rhodospirillales	Rhodospirillaceae	Phaeospirillum	Phaeospirillum fulvum	Phaeospirillum fulvum strain	0.059
strain	Bacteria	Proteobacteria	Alphaproteobacteria	Rhodospirillales	Rhodospirillaceae	Phaeospirillum	Phaeospirillum fulvum	Phaeospirillum fulvum strain	0.2738
strain	Bacteria	Proteobacteria	Alphaproteobacteria	Rhodospirillales	Rhodospirillaceae	Phaeospirillum	Phaeospirillum fulvum	Phaeospirillum fulvum strain	0.2382
strain	Bacteria	Proteobacteria	Alphaproteobacteria	Rhodospirillales	Rhodospirillaceae	Phaeospirillum	Phaeospirillum fulvum	Phaeospirillum fulvum strain	0.0785
strain	Bacteria	Proteobacteria	Alphaproteobacteria	Sphingomonadales	Sphingomonadaceae	Sphingomonas	Sphingomonas aestuarii	Sphingomonas aestuarii DSM 19475 strain	2.0693
strain	Bacteria	Proteobacteria	Alphaproteobacteria	Sphingomonadales	Sphingomonadaceae	Sphingomonas	Sphingomonas phyllosphaerae	Sphingomonas phyllosphaerae strain	0.2198
strain	Bacteria	Proteobacteria	Alphaproteobacteria	Sphingomonadales	Sphingomonadaceae	Sphingomonas		Sphingomonas strain	0.1073
strain	Bacteria	Proteobacteria	Alphaproteobacteria	Sphingomonadales	Sphingomonadaceae	Sphingomonas		Sphingomonas strain	0.1591
strain	Bacteria	Proteobacteria	Alphaproteobacteria	Sphingomonadales	Sphingomonadaceae	Sphingomonas		Sphingomonas strain	0.0277
strain	Bacteria	Proteobacteria	Betaproteobacteria	Burkholderiales	Comamonadaceae	Diaphorobacter	Diaphorobacter oryzae	Diaphorobacter oryzae DSM 22780 strain	0.251
strain	Bacteria	Proteobacteria	Betaproteobacteria	Burkholderiales	Comamonadaceae			Comamonadaceae strain	0.1187
strain	Bacteria	Proteobacteria	Betaproteobacteria	Burkholderiales	Comamonadaceae			Comamonadaceae strain	0.1741
strain	Bacteria	Proteobacteria	Betaproteobacteria	Burkholderiales	Comamonadaceae			Comamonadaceae strain	0.7231
strain	Bacteria	Proteobacteria	Betaproteobacteria	Burkholderiales	Comamonadaceae			Comamonadaceae strain	0.4222
strain	Bacteria	Proteobacteria	Betaproteobacteria	Burkholderiales	Comamonadaceae			Comamonadaceae strain	0.1233
strain	Bacteria	Proteobacteria	Betaproteobacteria	Burkholderiales	Comamonadaceae			Comamonadaceae strain	0.0648
strain	Bacteria	Proteobacteria	Betaproteobacteria	Burkholderiales	Oxalobacteraceae	Massilia	uncultured Massilia sp.	uncultured Massilia sp. strain	0.2404
strain	Bacteria	Proteobacteria	Betaproteobacteria	Burkholderiales	Oxalobacteraceae	Massilia	uncultured Massilia sp.	uncultured Massilia sp. strain	0.028
strain	Bacteria	Proteobacteria	Betaproteobacteria	Burkholderiales	Oxalobacteraceae	Massilia	uncultured Massilia sp.	uncultured Massilia sp. strain	0.1035
strain	Bacteria	Proteobacteria	Betaproteobacteria	Burkholderiales	Oxalobacteraceae	Massilia	uncultured Massilia sp.	uncultured Massilia sp. strain	0.2026
strain	Bacteria	Proteobacteria	Betaproteobacteria	Methylophilales	Methylophilaceae	Methylophilus		Methylophilus strain	0.0322
strain	Bacteria	Proteobacteria	Betaproteobacteria	Methylophilales	Methylophilaceae	Methylophilus		Methylophilus strain	0.0624
strain	Bacteria	Proteobacteria	Betaproteobacteria	Methylophilales	Methylophilaceae	Methylophilus		Methylophilus strain	0.0925
strain	Bacteria	Proteobacteria	Betaproteobacteria	Neisseriales	Neisseriaceae	Alysiella	Alysiella filiformis	Alysiella filiformis DSM 16848 strain	0.0007
strain	Bacteria	Proteobacteria	Betaproteobacteria	Nitrosomonadales	Nitrosomonadaceae	Nitrosomonas	Nitrosomonas europaea	Nitrosomonas europaea strain	0.0801
strain	Bacteria	Proteobacteria	Deltaproteobacteria	Desulfovibrionales	Desulfovibrionaceae	Desulfovibrio	Desulfovibrio alkalitolerans	Desulfovibrio alkalitolerans DSM 16529 strain	0.2921
strain	Bacteria	Proteobacteria	Deltaproteobacteria	Desulfovibrionales	Desulfovibrionaceae	Desulfovibrio	Desulfovibrio bizertensis	Desulfovibrio bizertensis DSM 18034 strain	1.5012
strain	Bacteria	Proteobacteria	Deltaproteobacteria	Desulfovibrionales	Desulfovibrionaceae	Desulfovibrio	Desulfovibrio vietnamensis	Desulfovibrio vietnamensis DSM 10520 strain	0.0094
strain	Bacteria	Proteobacteria	Gammaproteobacteria	Alteromonadales	Ferrimonadaceae	Ferrimonas	Ferrimonas marina	Ferrimonas marina strain	0.5545
strain	Bacteria	Proteobacteria	Gammaproteobacteria	Enterobacteriales	Enterobacteriaceae	Rahnella	Rahnella aquatilis	Rahnella aquatilis strain	0.2662
strain	Bacteria	Proteobacteria	Gammaproteobacteria	Legionellales	Legionellaceae	Tatlockia	Legionella maceachernii	Legionella maceachernii strain	0.1359
strain	Bacteria	Proteobacteria	Gammaproteobacteria	Pseudomonadales	Pseudomonadaceae	Azotobacter	Azotobacter vinelandii	Azotobacter vinelandii strain	0.2221
strain	Bacteria	Proteobacteria	Gammaproteobacteria	Vibrionales	Vibrionaceae	Vibrio	Vibrio cincinnatiensis	Vibrio cincinnatiensis DSM 19608 strain	0.0731
strain	Bacteria	Proteobacteria	Gammaproteobacteria	Vibrionales	Vibrionaceae	Vibrio	Vibrio gazogenes	Vibrio gazogenes DSM 21264 strain	0.0492
strain	Bacteria	Tenericutes	Mollicutes	Acholeplasmatales	Acholeplasmataceae	Acholeplasma	Acholeplasma oculi	Acholeplasma oculi strain	0.0846
strain	Viruses							Viruses strain	0.7023
strain	Viruses							Viruses strain	0.0625
strain	Viruses							Viruses strain	2.1032
strain	Viruses							Viruses strain	0.1599
strain	Viruses							Viruses strain	0.0784
strain	Viruses							Viruses strain	0.3129
strain	Viruses							Viruses strain	0.6925
strain	Viruses							Viruses strain	1.2898
strain	Viruses							Viruses strain	0.0127
strain	Viruses							Viruses strain	0.1602
strain	Viruses							Viruses strain	0.1284
strain	Viruses							Viruses strain	0.1724
strain	Viruses							Viruses strain	0.5137
strain	Viruses							Viruses strain	1.7459
strain	Viruses							Viruses strain	1.7632
strain	Viruses							Viruses strain	0.3024
strain	Viruses							Viruses strain	0.751
strain	Viruses							Viruses strain	3.9626
strain	Viruses							Viruses strain	1.0317
strain							unidentified	unidentified strain	0.1612
strain							unidentified	unidentified strain	1.349
strain							unidentified	unidentified strain	0.5388
strain							unidentified	unidentified strain	0.0192
strain							unidentified	unidentified strain	0.1849
strain							unidentified	unidentified strain	3.584
strain							unidentified	unidentified strain	0.1576
strain							unidentified	unidentified strain	0.0596
strain							unidentified	unidentified strain	0.1241
strain							unidentified	unidentified strain	0.0189
strain							unidentified	unidentified strain	0.4246
strain							unidentified	unidentified strain	0.0446
strain							unidentified	unidentified strain	1.0318
strain							unidentified	unidentified strain	3.994
strain							unidentified	unidentified strain	0.2537
strain							unidentified	unidentified strain	0.0179
strain							unidentified	unidentified strain	0.1424
strain							unidentified	unidentified strain	0.2438
strain							unidentified	unidentified strain	0.0079
strain							unidentified	unidentified strain	3.8401
strain							unidentified	unidentified strain	0.0593
strain							unidentified	unidentified strain	1.2833
strain							unidentified	unidentified strain	0.0305
strain							unidentified	unidentified strain	0.0157
strain							unidentified	unidentified strain	0.4479
strain							unidentified	unidentified strain	0.255
strain							unidentified	unidentified strain	0.0846
strain							unidentified	unidentified strain	2.9651
strain							unidentified	unidentified strain	0.5081
strain							unidentified	unidentified strain	0.9549
strain							unidentified	unidentified strain	0.0492
strain							unidentified	unidentified strain	1.0872
strain							unidentified	unidentified strain	0.0149
strain							unidentified	unidentified strain	0.2832
strain							unidentified	unidentified strain	0.0591
strain							unidentified	unidentified strain	0.0318
strain							unidentified	unidentified strain	0.2165
strain							unidentified	unidentified strain	0.7795
strain							unidentified	unidentified strain	0.0371
strain							unidentified	unidentified strain	0.6032
strain							unidentified plasmid	unidentified plasmid strain	0.0555
strain							unidentified plasmid	unidentified plasmid strain	0.0865
strain							unidentified plasmid	unidentified plasmid strain	1.9439
strain							unidentified plasmid	unidentified plasmid strain	0.1503
strain							unidentified plasmid	unidentified plasmid strain	1.264
strain							unidentified plasmid	unidentified plasmid strain	0.1233
strain							unidentified plasmid	unidentified plasmid strain	0.0824
strain							unidentified plasmid	unidentified plasmid strain	0.0332
strain							unidentified plasmid	unidentified plasmid strain	0.3863
strain							unidentified plasmid	unidentified plasmid strain	0.0349
strain							unidentified plasmid	unidentified plasmid strain	0.5023
strain							unidentified plasmid	unidentified plasmid strain	0.4966
strain							unidentified plasmid	unidentified plasmid strain	0.4261
strain							unidentified plasmid	unidentified plasmid strain	3.2524
strain							unidentified plasmid	unidentified plasmid strain	0.0893
strain							unidentified plasmid	unidentified plasmid strain	0.2062
strain							unidentified plasmid	unidentified plasmid strain	0.0482
strain							unidentified plasmid	unidentified plasmid strain	0.4058
strain							unidentified plasmid	unidentified plasmid strain	0.0211
strain							unidentified plasmid	unidentified plasmid strain	1.1034
strain							unidentified plasmid	unidentified plasmid strain	0.4541
strain							unidentified plasmid	unidentified plasmid strain	0.1251
strain							unidentified plasmid	unidentified plasmid strain	0.6286
strain							unidentified plasmid	unidentified plasmid strain	1.3797
strain							unidentified plasmid	unidentified plasmid strain	2.5426
strain							unidentified plasmid	unidentified plasmid strain	0.1128
strain							unidentified plasmid	unidentified plasmid strain	0.2231
strain							unidentified plasmid	unidentified plasmid strain	0.3006
strain							unidentified plasmid	unidentified plasmid strain	0.1436
strain							unidentified plasmid	unidentified plasmid strain	0.332
strain							unidentified plasmid	unidentified plasmid strain	0.7227
strain							unidentified plasmid	unidentified plasmid strain	0.0115
strain							unidentified plasmid	unidentified plasmid strain	0.0658
strain							unidentified plasmid	unidentified plasmid strain	0.0256
strain							unidentified plasmid	unidentified plasmid strain	7.9045
strain							unidentified plasmid	unidentified plasmid strain	0.0178
strain							unidentified plasmid	unidentified plasmid strain	0.0672
strain							unidentified plasmid	unidentified plasmid strain	0.4403
strain							unidentified plasmid	unidentified plasmid strain	0.8607
strain							unidentified plasmid	unidentified plasmid strain	0.2247
strain							unidentified plasmid	unidentified plasmid strain	0.0382
[truncated: 16 more columns]

## Sheet: CAMI genomes v4 region
v4 region (full-length) from medium genomes matched using usearch_global to RefSeq 16S									Species	Depth		Distinct Species	Count	Depth		16S reads mapped to extracted v4 regions								read	contig		distinct contigs	Count
H	2054	291	100	+	0	0	495I291M667I	NODE_2_length_1634_cov_86.146881#0	[Eubacterium]_yurii_strain_SM14_(NR_104843.1)	9		Limnohabitans_parvus_strain_II-B4_(NR_125542.1)	2	76		H	0	150	97	+	0	0	158I134M16D	RM2|S1|R44514838/2	scaffold10.1_23#0		scaffold10.1_23#0	13
H	10835	291	99	+	0	0	492I291M707I	scaffold00001_61#0	Acholeplasma_oculi_strain_19L_(NR_025960.1)	9.5		Mycobacterium_obuense_strain_47001_(NR_029218.1)	1	6.5		H	0	150	97.3	+	0	0	72I150M70I	RM2|S2|R18020093/2	scaffold10.1_23#0		scaffold1.1_33#0	304
H	5443	292	100	+	0	0	439I292M665I	scaffold1.1_29#0	Aeromicrobium_ponti_strain_HSW-1_(NR_042659.1)	31		Streptomyces_lunaelactis_strain_MM109_(NR_134822.1)	2	31.75		H	0	150	97.3	-	0	0	73I150M69I	RM2|S2|R24884448/2	scaffold10.1_23#0		scaffold00003_27#0	560
H	5443	292	100	+	0	0	439I292M665I	scaffold1.1_21#0	Aeromicrobium_ponti_strain_HSW-1_(NR_042659.1)			Cellulomonas_aerilata_strain_5420S-23_(NR_044526.1)	5	48.5		H	0	150	97.4	+	0	0	176I116M34D	RM2|S2|R40531435/1	scaffold10.1_23#0		scaffold1.1_28#0	38
H	5443	292	100	+	0	0	439I292M665I	scaffold1.1_10#0	Aeromicrobium_ponti_strain_HSW-1_(NR_042659.1)			Desulfovibrio_bizertensis_strain_MB3_(NR_043808.1)	1	219		H	0	150	97.5	+	0	0	212I80M70D	RM2|S1|R8116623/2	scaffold10.1_23#0		scaffold2.1_25#0	88
H	7062	292	100	+	0	0	508I292M692I	scaffold00048_4#0	Alysiella_crassa_strain_IAM_14969_(NR_040932.1)	0		Alysiella_crassa_strain_IAM_14969_(NR_040932.1)	1	0		H	0	150	97.9	+	0	0	53D97M195I	RM2|S2|R38588487/2	scaffold10.1_23#0		scaffold13.1_29#0	27
H	4539	292	99.3	+	0	0	411I292M657I	scaffold3.1_26#0	Aureimonas_ureilytica_strain_5715S-12_(NR_043995.1)	171		Picrophilus_torridus_strain_DSM_9790_(NR_074187.1)	1	56.5		H	0	150	98	-	0	0	31I150M111I	RM2|S2|R36391418/2	scaffold10.1_23#0		contig_2_8#0	11
H	4539	292	99.3	+	0	0	411I292M657I	scaffold3.1_31#0	Aureimonas_ureilytica_strain_5715S-12_(NR_043995.1)			Diaphorobacter_oryzae_strain_RF3_(NR_044472.1)	1	52		H	0	150	98.2	+	0	0	41D109M183I	RM2|S1|R22077027/1	scaffold10.1_23#0		contig_1_4#0	11
H	6482	292	100	+	0	0	496I292M691I	NODE_1_length_1097_cov_82.064720#0	Bacillus_coagulans_strain_NBRC_12583_(NR_041523.1)	21.5		Phenylobacterium_zucineum_strain_HLK1_(NR_074119.1)	1	9.5		H	0	150	98.7	-	0	0	81I150M61I	RM2|S1|R22077027/2	scaffold10.1_23#0		scaffold00006_3#0	193
H	1210	292	100	+	0	0	413I292M700I	scaffold13.1_3#0	Bosea_vaviloviae_strain_Vaf-18_(NR_136423.1)	22.5		Sphingomonas_aestuarii_strain_K4_(NR_044341.1)	1	280		H	0	150	98.7	-	0	0	94I150M48I	RM2|S2|R38588487/1	scaffold10.1_23#0		NODE_2_length_1634_cov_86.146881#0	18
H	1210	292	99.7	+	0	0	413I292M700I	scaffold4.1_15#0	Bosea_vaviloviae_strain_Vaf-18_(NR_136423.1)	16.5		[Eubacterium]_yurii_strain_SM14_(NR_104843.1)	1	9		H	0	150	98.9	+	0	0	202I90M60D	RM2|S1|R37379187/1	scaffold10.1_23#0		scaffold00001_61#0	19
H	10814	292	99.7	+	0	0	483I292M702I	scaffold00080_13#0	Butyrivibrio_fibrisolvens_strain_ATCC_19171_(NR_025981.1)	13		Desulfovibrio_alkalitolerans_strain_RT2_(NR_043069.1)	2	48.25		H	0	150	98.9	+	0	0	202I90M60D	RM2|S2|R28529116/2	scaffold10.1_23#0		scaffold00001_4#0	29
H	10814	292	99.7	+	0	0	483I292M702I	NODE_1_length_1115_cov_77.946190#0	Butyrivibrio_fibrisolvens_strain_ATCC_19171_(NR_025981.1)			Acholeplasma_oculi_strain_19L_(NR_025960.1)	1	9.5		H	0	150	98.9	-	0	0	56D94M198I	RM2|S2|R30947229/1	scaffold10.1_23#0		NODE_1_length_1627_cov_58.757221#0	44
H	9390	292	99.7	+	0	0	480I25MD266M704I	NODE_2_length_1481_cov_83.598244#0	Butyrivibrio_hungatei_strain_JK_615_(NR_025525.1)	12		Nitrosomonas_europaea_strain_C-31_(NR_040879.1)	1	14.5		H	1	150	100	+	0	0	112I150M30I	RM2|S1|R37314033/1	scaffold1.1_33#0		scaffold00025_13#0	16
H	8701	291	100	+	0	0	446I291M706I	NODE_3_length_998_cov_71.539078#0	Caloranaerobacter_azorensis_strain_MV1087_(NR_028919.1)	11		Clostridium_cochlearium_strain_ATCC_17787_(NR_044717.2)	1	11.5		H	1	150	100	+	0	0	116I150M26I	RM2|S1|R23210886/1	scaffold1.1_33#0		NODE_2_length_1542_cov_74.731514#0	23
H	9430	291	100	+	0	0	489I291M676I	NODE_2_length_1381_cov_76.975380#0	Caminicella_sporogenes_strain_AM1114_(NR_025485.1)	9		Porphyromonas_crevioricanis_strain_NUM_402_(NR_104834.1)	1	8		H	1	150	100	+	0	0	146I146M4D	RM2|S1|R34917426/2	scaffold1.1_33#0		NODE_2_length_1420_cov_67.210564#0	4
H	4190	292	100	+	0	0	435I292M660I	scaffold2.1_35#0	Cellulomonas_aerilata_strain_5420S-23_(NR_044526.1)	48.5		Legionella_maceachernii_strain_ATCC_35300_(NR_041790.1)	1	22		H	1	150	100	+	0	0	159I133M17D	RM2|S1|R6846846/1	scaffold1.1_33#0		NODE_1_length_1097_cov_82.064720#0	43
H	4190	292	100	+	0	0	435I292M660I	scaffold1.1_38#0	Cellulomonas_aerilata_strain_5420S-23_(NR_044526.1)			Prevotella_oulorum_strain_WPH_179_(NR_029147.1)	1	0		H	1	150	100	+	0	0	170I122M28D	RM2|S2|R7715353/1	scaffold1.1_33#0		scaffold00064_1#0	24
H	4190	292	100	+	0	0	435I292M660I	scaffold1.1_37#0	Cellulomonas_aerilata_strain_5420S-23_(NR_044526.1)			Bacillus_coagulans_strain_NBRC_12583_(NR_041523.1)	1	21.5		H	1	150	100	+	0	0	180I112M38D	RM2|S1|R4535103/1	scaffold1.1_33#0		NODE_3_length_998_cov_71.539078#0	22
H	4190	292	100	+	0	0	435I292M660I	scaffold3.1_22#0	Cellulomonas_aerilata_strain_5420S-23_(NR_044526.1)			Ferrithrix_thermotolerans_strain_Y005_(NR_042751.1)	1	12		H	1	150	100	+	0	0	181I111M39D	RM2|S1|R16024161/1	scaffold1.1_33#0		scaffold00082_12#0	31
H	4190	292	100	+	0	0	435I292M660I	scaffold2.1_2#0	Cellulomonas_aerilata_strain_5420S-23_(NR_044526.1)			Lutispora_thermophila_strain_EBR46_(NR_041236.1)	1	2		H	1	150	100	+	0	0	203I89M61D	RM2|S1|R49647872/1	scaffold1.1_33#0		scaffold00080_13#0	52
H	5455	292	98.3	+	0	0	476I292M694I	scaffold1.1_3#0	Chryseobacterium_gregarium_strain_P_461/12_(NR_042647.1)	5.5		Clostridium_grantii_strain_A1_(NR_026131.1)	1	15.5		H	1	150	100	+	0	0	207I85M65D	RM2|S1|R23654366/1	scaffold1.1_33#0		NODE_2_length_1481_cov_83.598244#0	24
H	3198	292	99.7	+	0	0	489I292M679I	NODE_2_length_1542_cov_74.731514#0	Clostridium_cochlearium_strain_ATCC_17787_(NR_044717.2)	11.5		Caloranaerobacter_azorensis_strain_MV1087_(NR_028919.1)	1	11		H	1	150	100	+	0	0	213I79M71D	RM2|S1|R22004733/1	scaffold1.1_33#0		NODE_4_length_1108_cov_67.821297#0	90
H	10671	292	100	+	0	0	473I292M729I	scaffold00082_12#0	Clostridium_grantii_strain_A1_(NR_026131.1)	15.5		Butyrivibrio_fibrisolvens_strain_ATCC_19171_(NR_025981.1)	2	13		H	1	150	100	+	0	0	27D123M169I	RM2|S1|R14702726/1	scaffold1.1_33#0		NODE_2_length_1430_cov_88.053146#0	170
H	9448	292	99.7	+	0	0	464I292M721I	scaffold1.1_14#0	Curtobacterium_flaccumfaciens_strain_LMG_3645_(NR_025467.1)	6.5		Butyrivibrio_hungatei_strain_JK_615_(NR_025525.1)	1	12		H	1	150	100	+	0	0	45I150M97I	RM2|S2|R14250103/1	scaffold1.1_33#0		scaffold1.1_36#0	127
H	7737	292	99.3	+	0	0	518I229MI63M706I	scaffold00006_3#0	Desulfovibrio_alkalitolerans_strain_RT2_(NR_043069.1)	48.25		Propionispora_hippei_strain_KS_(NR_036875.1)	1	85		H	1	150	100	+	0	0	73I150M69I	RM2|S1|R34300643/2	scaffold1.1_33#0		NODE_2_length_1381_cov_76.975380#0	18
H	7737	292	99.3	+	0	0	518I229MI63M706I	scaffold00012_3#0	Desulfovibrio_alkalitolerans_strain_RT2_(NR_043069.1)			Caminicella_sporogenes_strain_AM1114_(NR_025485.1)	1	9		H	1	150	100	+	0	0	94I150M48I	RM2|S2|R11742708/1	scaffold1.1_33#0		scaffold00047_27#0	29
H	4651	292	100	+	0	0	513I292M707I	scaffold00026_38#0	Desulfovibrio_bizertensis_strain_MB3_(NR_043808.1)	219		Tepidibacter_thalassicus_strain_SC_562_(NR_025678.1)	1	45		H	1	150	100	-	0	0	129I150M13I	RM2|S1|R16367628/1	scaffold1.1_33#0		scaffold00020_50#0	12
H	4220	292	100	+	0	0	452I292M657I	scaffold00025_11#0	Diaphorobacter_oryzae_strain_RF3_(NR_044472.1)	52		Tessaracoccus_flavescens_strain_SST-39_(NR_042550.1)	2	7.25		H	1	150	100	-	0	0	164I128M22D	RM2|S2|R2243229/2	scaffold1.1_33#0		scaffold00039_11#0	35
H	4855	292	100	+	0	0	523I292M735I	scaffold1.1_19#0	Exiguobacterium_acetylicum_strain_DSM_20416_(NR_043479.1)	12		Pseudoxanthobacter_soli_strain_CC4_(NR_044225.1)	1	6		H	1	150	100	-	0	0	165I127M23D	RM2|S2|R9462955/1	scaffold1.1_33#0		scaffold00006_12#0	557
H	4855	292	96.9	+	0	0	523I292M735I	contig_2_8#0	Exiguobacterium_acetylicum_strain_DSM_20416_(NR_043479.1)	1.83333		Kibdelosporangium_aridum_subsp._largum_strain_SKF-AAD-609_(NR_025571.1)	1	17.5		H	1	150	100	-	0	0	196I96M54D	RM2|S1|R4571473/1	scaffold1.1_33#0		scaffold00003_8#0	17
H	4855	292	99.3	+	0	0	523I292M735I	contig_1_4#0	Exiguobacterium_acetylicum_strain_DSM_20416_(NR_043479.1)	1.83333		Olleya_aquimaris_strain_L-4_(NR_104531.1)	3	92.8333		H	1	150	100	-	0	0	198I94M56D	RM2|S1|R5288531/1	scaffold1.1_33#0		scaffold2.1_35#0	485
H	5362	293	100	+	0	0	484I293M554I	scaffold00064_1#0	Ferrithrix_thermotolerans_strain_Y005_(NR_042751.1)	12		Ohtaekwangia_kribbensis_strain_10AO_(NR_117436.1)	3	2.83333		H	1	150	100	-	0	0	205I87M63D	RM2|S1|R39445450/2	scaffold1.1_33#0		scaffold00001_7#0	25
H	4585	292	100	+	0	0	476I292M665I	scaffold2.1_5#0	Frondihabitans_australicus_strain_E1HC-02_(NR_043897.1)	37		Ohtaekwangia_koreensis_strain_3B-2_(NR_117435.1)	3	4.16667		H	1	150	100	-	0	0	207I85M65D	RM2|S1|R34300643/1	scaffold1.1_33#0		scaffold00020_23#0	175
H	9360	293	100	+	0	0	431I293M710I	scaffold00003_38#0	Halobacterium_salinarum_strain_91-R6_(NR_025555.1)	38		Rhodobacter_viridis_strain_JA737_(NR_108854.1)	2	43.75		H	1	150	100	-	0	0	207I85M65D	RM2|S2|R43741340/1	scaffold1.1_33#0		scaffold00047_20#0	14
H	9360	293	100	+	0	0	431I293M710I	scaffold00001_23#0	Halobacterium_salinarum_strain_91-R6_(NR_025555.1)			Rhodobaca_barguzinensis_strain_VKM_B-2406_(NR_044285.1)	2	3.5		H	1	150	100	-	0	0	30D120M172I	RM2|S2|R15198884/1	scaffold1.1_33#0		scaffold00002_69#0	82
H	1425	292	100	+	0	0	505I292M691I	scaffold00002_69#0	Ichthyenterobacterium_magnum_strain_Th6_(NR_134750.1)	41		Ichthyenterobacterium_magnum_strain_Th6_(NR_134750.1)	1	41		H	1	150	100	-	0	0	31D119M173I	RM2|S1|R8477130/1	scaffold1.1_33#0		scaffold00038_3#0	2
H	9344	292	100	+	0	0	469I292M713I	scaffold00039_11#0	Kibdelosporangium_aridum_subsp._largum_strain_SKF-AAD-609_(NR_025571.1)	17.5		Sphingobacterium_nematocida_strain_M-SX103_(NR_122101.1)	1	1		H	1	150	100	-	0	0	6I150M136I	RM2|S2|R9762520/1	scaffold1.1_33#0		scaffold00098_8#0	15
H	2448	292	100	+	0	0	469I292M687I	scaffold1.1_4#0	Knoellia_locipacati_strain_DMZ1_(NR_109064.1)	46		Paracoccus_versutus_strain_ATCC_25364_(NR_042713.1)	2	3.75		H	1	150	100	-	0	0	71D79M213I	RM2|S1|R7122365/2	scaffold1.1_33#0		scaffold00026_38#0	438
H	7911	293	100	+	0	0	487I293M694I	NODE_1_length_1627_cov_58.757221#0	Legionella_maceachernii_strain_ATCC_35300_(NR_041790.1)	22		Halobacterium_salinarum_strain_91-R6_(NR_025555.1)	2	38		H	1	150	100	-	0	0	74D76M216I	RM2|S2|R35334020/1	scaffold1.1_33#0		scaffold00003_38#0	152
H	11942	292	100	+	0	0	455I292M736I	scaffold1.1_33#0	Limnohabitans_parvus_strain_II-B4_(NR_125542.1)	76		Sinorhizobium_meliloti_strain_LMG_6133_(NR_118988.1)	2	131		H	1	150	97	-	0	0	192I100M50D	RM2|S1|R11365464/2	scaffold1.1_33#0		scaffold00121_0#0	524
H	11942	292	100	+	0	0	455I292M736I	scaffold1.1_32#0	Limnohabitans_parvus_strain_II-B4_(NR_125542.1)			Moorella_thermoautotrophica_strain_JW_701/3_(NR_029144.1)	2	279.5		H	1	150	97.1	+	0	0	11D139M153I	RM2|S1|R48401989/1	scaffold1.1_33#0		scaffold00022_25#0	1118
H	6766	292	100	+	0	0	470I292M676I	NODE_2_length_1420_cov_67.210564#0	Lutispora_thermophila_strain_EBR46_(NR_041236.1)	2		Phaeospirillum_molischianum_strain_DSM_120_(NR_104755.1)	4	23		H	1	150	97.1	+	0	0	154I138M12D	RM2|S1|R38682247/2	scaffold1.1_33#0		scaffold00028_0#0	184
H	4160	292	99.7	+	0	0	452I292M654I	scaffold1.1_43#0	Massilia_niabensis_strain_5420S-26_(NR_044571.1)	41.75		Promicromonospora_vindobonensis_strain_V-45_(NR_042146.1)	1	14		H	1	150	97.1	+	0	0	156I136M14D	RM2|S1|R31278767/1	scaffold1.1_33#0		scaffold00064_15#0	28
H	4160	292	99.7	+	0	0	452I292M654I	scaffold2.1_11#0	Massilia_niabensis_strain_5420S-26_(NR_044571.1)			Xanthobacter_autotrophicus_strain_7c_(NR_026308.1)	1	7.5		H	1	150	97.1	-	0	0	153I139M11D	RM2|S1|R25117572/2	scaffold1.1_33#0		scaffold00036_25#0	15
H	4456	292	99	+	0	0	407I292M666I	scaffold1.1_1#0	Mesorhizobium_caraganae_strain_CCBAU_11299_(NR_044118.1)	43.5		Mesorhizobium_chacoense_strain_PR5_(NR_025411.1)	1	2		H	1	150	97.1	-	0	0	156I136M14D	RM2|S1|R22350392/1	scaffold1.1_33#0		scaffold7.1_8#0	4
H	9503	292	98.6	+	0	0	442I292M732I	scaffold7.1_8#0	Mesorhizobium_chacoense_strain_PR5_(NR_025411.1)	2		Rhizobium_daejeonense_strain_L61_(NR_042851.1)	1	3.5		H	1	150	97.2	+	0	0	44D106M186I	RM2|S1|R8722150/1	scaffold1.1_33#0		scaffold13.1_3#0	90
H	3151	292	100	+	0	0	460I292M678I	scaffold2.1_24#0	Methylophilus_flavus_strain_Ship_(NR_104519.1)	8.66667		Bosea_vaviloviae_strain_Vaf-18_(NR_136423.1)	2	22.5		H	1	150	97.2	-	0	0	183I109M41D	RM2|S1|R28248322/2	scaffold1.1_33#0		scaffold1.1_9#0	7
H	3151	292	100	+	0	0	460I292M678I	scaffold2.1_18#0	Methylophilus_flavus_strain_Ship_(NR_104519.1)			Sphingomonas_starnbergensis_strain_382_(NR_109485.1)	3	21.1667		H	1	150	97.3	+	0	0	108I150M34I	RM2|S1|R49677329/2	scaffold1.1_33#0		scaffold7.1_6#0	127
H	3151	292	100	+	0	0	460I292M678I	scaffold2.1_16#0	Methylophilus_flavus_strain_Ship_(NR_104519.1)			Variovorax_boronicumulans_strain_BAM-48_(NR_041588.1)	2	23		H	1	150	97.3	+	0	0	10I150M132I	RM2|S1|R36195301/1	scaffold1.1_33#0		scaffold2.1_39#0	143
H	8484	292	100	+	0	0	524I292M737I	scaffold00022_25#0	Moorella_thermoautotrophica_strain_JW_701/3_(NR_029144.1)	279.5		Sanguibacter_marinus_strain_1-19_(NR_042311.1)	2	35.75		H	1	150	97.3	+	0	0	139I150M3I	RM2|S1|R17405401/1	scaffold1.1_33#0		scaffold3.1_17#0	92
H	8484	292	100	+	0	0	524I292M737I	scaffold00016_14#0	Moorella_thermoautotrophica_strain_JW_701/3_(NR_029144.1)			Variovorax_paradoxus_strain_13-0-1D_(NR_036930.1)	1	8.5		H	1	150	97.3	+	0	0	139I150M3I	RM2|S2|R4242272/2	scaffold1.1_33#0		scaffold00025_11#0	104
H	8419	292	99.7	+	0	0	485I292M681I	scaffold10.1_23#0	Mycobacterium_obuense_strain_47001_(NR_029218.1)	6.5		Massilia_niabensis_strain_5420S-26_(NR_044571.1)	2	41.75		H	1	150	97.3	+	0	0	13I150M129I	RM2|S2|R48744456/2	scaffold1.1_33#0		scaffold9.1_31#0	17
H	7114	292	100	+	0	0	469I292M612I	scaffold00001_4#0	Nitrosomonas_europaea_strain_C-31_(NR_040879.1)	14.5		Frondihabitans_australicus_strain_E1HC-02_(NR_043897.1)	1	37		H	1	150	97.3	+	0	0	140I150M2I	RM2|S1|R47415146/1	scaffold1.1_33#0		scaffold1.1_43#0	167
H	3107	292	100	+	0	0	441I292M589I	scaffold2.1#0	Nocardia_coubleae_strain_OFN_N12_(NR_104567.1)	14		Phycicoccus_dokdonensis_strain_DS-8_(NR_044286.1)	2	24.25		H	1	150	97.3	+	0	0	141I150MI	RM2|S1|R34440215/1	scaffold1.1_33#0		scaffold2.1_5#0	74
H	13926	292	100	+	0	0	479I292M673I	scaffold00001_7#0	Ohtaekwangia_koreensis_strain_3B-2_(NR_117435.1)	4.16667		Paenibacillus_frigoriresistens_strain_YIM_016_(NR_109546.1)	1	1		H	1	150	97.3	+	0	0	15I150M127I	RM2|S1|R34112998/1	scaffold1.1_33#0		scaffold8.1_17#0	2
H	13926	292	100	+	0	0	479I292M673I	scaffold00002_7#0	Ohtaekwangia_koreensis_strain_3B-2_(NR_117435.1)			Mesorhizobium_caraganae_strain_CCBAU_11299_(NR_044118.1)	1	43.5		H	1	150	97.3	+	0	0	2D148M144I	RM2|S1|R39184108/2	scaffold1.1_33#0		scaffold1.1_23#0	97
H	13926	292	100	+	0	0	479I292M673I	scaffold00005_7#0	Ohtaekwangia_koreensis_strain_3B-2_(NR_117435.1)			Knoellia_locipacati_strain_DMZ1_(NR_109064.1)	1	46		H	1	150	97.3	+	0	0	35I150M107I	RM2|S1|R26916701/2	scaffold1.1_33#0		scaffold00001_42#0	113
H	13925	292	100	+	0	0	479I292M673I	scaffold00003_8#0	Ohtaekwangia_kribbensis_strain_10AO_(NR_117436.1)	2.83333		Nocardia_coubleae_strain_OFN_N12_(NR_104567.1)	1	14		H	1	150	97.3	+	0	0	39I150M103I	RM2|S2|R11892816/1	scaffold1.1_33#0		scaffold1.1_1#0	87
H	13925	292	100	+	0	0	479I292M673I	scaffold00004_8#0	Ohtaekwangia_kribbensis_strain_10AO_(NR_117436.1)			Aeromicrobium_ponti_strain_HSW-1_(NR_042659.1)	3	31		H	1	150	97.3	+	0	0	40I150M102I	RM2|S1|R26588511/2	scaffold1.1_33#0		scaffold2.1#0	28
H	13925	292	100	+	0	0	479I292M673I	scaffold00006_8#0	Ohtaekwangia_kribbensis_strain_10AO_(NR_117436.1)			Rhodococcus_yunnanensis_strain_YIM_70056_(NR_043009.1)	1	245		H	1	150	97.3	+	0	0	40I150M102I	RM2|S1|R27880945/2	scaffold1.1_33#0		scaffold1.1_4#0	92
H	3139	292	100	+	0	0	479I292M672I	scaffold00006_12#0	Olleya_aquimaris_strain_L-4_(NR_104531.1)	92.8333		Chryseobacterium_gregarium_strain_P_461/12_(NR_042647.1)	1	5.5		H	1	150	97.3	+	0	0	48I150M94I	RM2|S2|R9462955/2	scaffold1.1_33#0		scaffold1.1_29#0	186
H	3139	292	100	+	0	0	479I292M672I	scaffold00011_11#0	Olleya_aquimaris_strain_L-4_(NR_104531.1)			Methylophilus_flavus_strain_Ship_(NR_104519.1)	3	8.66667		H	1	150	97.3	+	0	0	65I150M77I	RM2|S1|R2493574/1	scaffold1.1_33#0		scaffold1.1_44#0	490
H	3139	292	100	+	0	0	479I292M672I	scaffold00008_11#0	Olleya_aquimaris_strain_L-4_(NR_104531.1)			Curtobacterium_flaccumfaciens_strain_LMG_3645_(NR_025467.1)	1	6.5		H	1	150	97.3	+	0	0	6I150M136I	RM2|S1|R4571473/2	scaffold1.1_33#0		scaffold1.1_3#0	11
H	2249	291	100	+	0	0	490I291M703I	scaffold8.1_17#0	Paenibacillus_frigoriresistens_strain_YIM_016_(NR_109546.1)	1		Sphingomonas_phyllosphaerae_strain_FA2_(NR_029111.1)	1	42		H	1	150	97.3	+	0	0	90I150M52I	RM2|S1|R19944171/2	scaffold1.1_33#0		scaffold00020_11#0	19
H	5389	292	100	+	0	0	451I292M714I	scaffold00098_8#0	Paracoccus_versutus_strain_ATCC_25364_(NR_042713.1)	3.75		Aureimonas_ureilytica_strain_5715S-12_(NR_043995.1)	2	171		H	1	150	97.3	+	0	0	93I150M49I	RM2|S1|R38372140/2	scaffold1.1_33#0		scaffold2.1_24#0	52
H	5389	292	100	+	0	0	451I292M714I	scaffold00043_25#0	Paracoccus_versutus_strain_ATCC_25364_(NR_042713.1)			Pedobacter_ginsenosidimutans_strain_THG-45_(NR_108685.1)	1	11.5		H	1	150	97.3	+	0	0	98I150M44I	RM2|S1|R30246762/1	scaffold1.1_33#0		scaffold1.1_14#0	13
H	1313	292	100	+	0	0	478I292M673I	scaffold5.1_26#0	Pedobacter_ginsenosidimutans_strain_THG-45_(NR_108685.1)	11.5		Exiguobacterium_acetylicum_strain_DSM_20416_(NR_043479.1)	3	12		H	1	150	97.3	-	0	0	100I150M42I	RM2|S1|R14702726/2	scaffold1.1_33#0		scaffold1.1_13#0	84
H	1864	292	99.7	+	0	0	485I292M644I	scaffold1.1_28#0	Pedobacter_jejuensis_strain_THG-DR3_(NR_133810.1)	19		Pedobacter_jejuensis_strain_THG-DR3_(NR_133810.1)	1	19		H	1	150	97.3	-	0	0	101I150M41I	RM2|S1|R38461073/2	scaffold1.1_33#0		scaffold5.1_26#0	23
H	2057	292	100	+	0	0	446I292M735I	scaffold00028_0#0	Phaeospirillum_molischianum_strain_DSM_120_(NR_104755.1)	23		Serratia_aquatilis_strain_2015-2462-01_(NR_147771.1)	1	44		H	1	150	97.3	-	0	0	123I150M19I	RM2|S1|R26132456/1	scaffold1.1_33#0		scaffold3.1_26#0	684
H	2057	292	100	+	0	0	446I292M735I	scaffold00032_1#0	Phaeospirillum_molischianum_strain_DSM_120_(NR_104755.1)			Piscinibacter_aquaticus_strain_IMCC1728_(NR_043921.1)	1	13.5		H	1	150	97.3	-	0	0	137I150M5I	RM2|S1|R49542993/2	scaffold1.1_33#0		scaffold4.1_15#0	66
H	2057	292	100	+	0	0	446I292M735I	scaffold00023_2#0	Phaeospirillum_molischianum_strain_DSM_120_(NR_104755.1)							H	1	150	97.3	-	0	0	150M142I	RM2|S1|R30424124/1	scaffold1.1_33#0		scaffold1.1_19#0	72
H	2057	292	100	+	0	0	446I292M735I	scaffold00026_45#0	Phaeospirillum_molischianum_strain_DSM_120_(NR_104755.1)							H	1	150	97.3	-	0	0	15I150M127I	RM2|S1|R1605684/2	scaffold1.1_33#0
H	3419	292	100	+	0	0	448I292M734I	scaffold00020_11#0	Phenylobacterium_zucineum_strain_HLK1_(NR_074119.1)	9.5						H	1	150	97.3	-	0	0	179I113M37D	RM2|S1|R3303723/1	scaffold1.1_33#0
H	4342	292	100	+	0	0	467I292M722I	scaffold1.1_23#0	Phycicoccus_dokdonensis_strain_DS-8_(NR_044286.1)	24.25						H	1	150	97.3	-	0	0	182I110M40D	RM2|S1|R15954263/2	scaffold1.1_33#0
H	4342	292	100	+	0	0	467I292M722I	scaffold6.1_0#0	Phycicoccus_dokdonensis_strain_DS-8_(NR_044286.1)							H	1	150	97.3	-	0	0	217I75M75D	RM2|S1|R10932222/2	scaffold1.1_33#0
H	3381	292	100	+	0	0	459I292M718I	scaffold00001_42#0	Picrophilus_torridus_strain_DSM_9790_(NR_074187.1)	56.5						H	1	150	97.3	-	0	0	217I75M75D	RM2|S1|R24575643/1	scaffold1.1_33#0
H	4573	292	99.7	+	0	0	487I292M691I	scaffold13.1_29#0	Piscinibacter_aquaticus_strain_IMCC1728_(NR_043921.1)	13.5						H	1	150	97.3	-	0	0	21I150M121I	RM2|S1|R41279745/2	scaffold1.1_33#0
H	2954	292	100	+	0	0	486I292M676I	scaffold00025_13#0	Porphyromonas_crevioricanis_strain_NUM_402_(NR_104834.1)	8						H	1	150	97.3	-	0	0	24I150M118I	RM2|S2|R16429765/2	scaffold1.1_33#0
H	8482	292	100	+	0	0	512I292M706I	scaffold00056_13#0	Prevotella_oulorum_strain_WPH_179_(NR_029147.1)	0						H	1	150	97.3	-	0	0	27I150M115I	RM2|S2|R12521941/1	scaffold1.1_33#0
H	5943	292	99.7	+	0	0	409I292M641I	scaffold00064_15#0	Promicromonospora_vindobonensis_strain_V-45_(NR_042146.1)	14						H	1	150	97.3	-	0	0	38D112M180I	RM2|S1|R6969254/1	scaffold1.1_33#0
H	8163	291	100	+	0	0	517I291M739I	NODE_2_length_1430_cov_88.053146#0	Propionispora_hippei_strain_KS_(NR_036875.1)	85						H	1	150	97.3	-	0	0	51I150M91I	RM2|S1|R34554385/2	scaffold1.1_33#0
H	4380	292	100	+	0	0	434I292M710I	scaffold00020_50#0	Pseudoxanthobacter_soli_strain_CC4_(NR_044225.1)	6						H	1	150	97.3	-	0	0	63I150M79I	RM2|S2|R16314378/1	scaffold1.1_33#0
H	5307	292	100	+	0	0	434I292M695I	scaffold1.1_9#0	Rhizobium_daejeonense_strain_L61_(NR_042851.1)	3.5						H	1	150	97.3	-	0	0	83I150M59I	RM2|S1|R4104325/1	scaffold1.1_33#0
H	4343	292	100	+	0	0	420I292M655I	scaffold00047_20#0	Rhodobaca_barguzinensis_strain_VKM_B-2406_(NR_044285.1)	3.5						H	1	150	97.3	-	0	0	93I150M49I	RM2|S1|R2544531/2	scaffold1.1_33#0
H	4343	292	100	+	0	0	420I292M655I	NODE_1_length_1568_cov_73.441330#0	Rhodobaca_barguzinensis_strain_VKM_B-2406_(NR_044285.1)							H	1	150	97.4	+	0	0	176I116M34D	RM2|S1|R29907025/2	scaffold1.1_33#0
H	2539	292	100	+	0	0	406I292M693I	scaffold00020_23#0	Rhodobacter_viridis_strain_JA737_(NR_108854.1)	43.75						H	1	150	97.4	+	0	0	215I77M73D	RM2|S1|R42609816/1	scaffold1.1_33#0
H	2539	292	100	+	0	0	406I292M693I	scaffold00007_23#0	Rhodobacter_viridis_strain_JA737_(NR_108854.1)							H	1	150	97.4	+	0	0	72D78M214I	RM2|S1|R3356988/2	scaffold1.1_33#0
H	5193	292	100	+	0	0	456I292M718I	scaffold1.1_44#0	Rhodococcus_yunnanensis_strain_YIM_70056_(NR_043009.1)	245						H	1	150	97.4	+	0	0	74D76M216I	RM2|S1|R42115391/1	scaffold1.1_33#0
H	5780	292	100	+	0	0	486I292M708I	scaffold2.1_39#0	Sanguibacter_marinus_strain_1-19_(NR_042311.1)	35.75						H	1	150	97.4	-	0	0	35D115M177I	RM2|S1|R30417111/1	scaffold1.1_33#0
H	5780	292	100	+	0	0	486I292M708I	scaffold1.1_45#0	Sanguibacter_marinus_strain_1-19_(NR_042311.1)							H	1	150	97.4	-	0	0	74D76M216I	RM2|S1|R1873473/2	scaffold1.1_33#0
H	110	292	100	+	0	0	468I292M694I	scaffold2.1_25#0	Serratia_aquatilis_strain_2015-2462-01_(NR_147771.1)	44						H	1	150	97.5	+	0	0	171I121M29D	RM2|S1|R39042431/1	scaffold1.1_33#0
H	12511	292	100	+	0	0	428I292M717I	scaffold00121_0#0	Sinorhizobium_meliloti_strain_LMG_6133_(NR_118988.1)	131						H	1	150	97.5	+	0	0	174I118M32D	RM2|S1|R1430052/1	scaffold1.1_33#0
H	12511	292	100	+	0	0	428I292M717I	scaffold00094_3#0	Sinorhizobium_meliloti_strain_LMG_6133_(NR_118988.1)							H	1	150	97.5	+	0	0	212I80M70D	RM2|S1|R1399122/2	scaffold1.1_33#0
H	12046	292	100	+	0	0	453I292M645I	scaffold00038_3#0	Sphingobacterium_nematocida_strain_M-SX103_(NR_122101.1)	1						H	1	150	97.5	-	0	0	172I120M30D	RM2|S1|R36672193/1	scaffold1.1_33#0
H	4312	292	100	+	0	0	381I292M671I	scaffold00003_27#0	Sphingomonas_aestuarii_strain_K4_(NR_044341.1)	280						H	1	150	97.5	-	0	0	213I79M71D	RM2|S1|R5688653/1	scaffold1.1_33#0
H	8513	292	99.7	+	0	0	451I292M719I	scaffold1.1_13#0	Sphingomonas_phyllosphaerae_strain_FA2_(NR_029111.1)	42						H	1	150	97.5	-	0	0	213I79M71D	RM2|S2|R29346819/2	scaffold1.1_33#0
H	2294	292	99.7	+	0	0	451I292M713I	scaffold7.1_6#0	Sphingomonas_starnbergensis_strain_382_(NR_109485.1)	21.1667						H	1	150	97.5	-	0	0	69D81M211I	RM2|S2|R5219055/2	scaffold1.1_33#0
H	2294	292	99.7	+	0	0	451I292M713I	scaffold9.1_33#0	Sphingomonas_starnbergensis_strain_382_(NR_109485.1)							H	1	150	97.6	+	0	0	168I124M26D	RM2|S2|R31803976/1	scaffold1.1_33#0
H	2294	292	99.7	+	0	0	451I292M713I	scaffold8.1_9#0	Sphingomonas_starnbergensis_strain_382_(NR_109485.1)							H	1	150	97.6	+	0	0	207I85M65D	RM2|S1|R30448812/2	scaffold1.1_33#0
H	96	292	100	+	0	0	435I292M693I	scaffold1.1_36#0	Streptomyces_lunaelactis_strain_MM109_(NR_134822.1)	31.75						H	1	150	97.6	+	0	0	24D126M166I	RM2|S1|R26512028/2	scaffold1.1_33#0
H	96	292	100	+	0	0	435I292M693I	scaffold1.1_30#0	Streptomyces_lunaelactis_strain_MM109_(NR_134822.1)							H	1	150	97.6	+	0	0	68D29MD52M211I	RM2|S1|R38461073/1	scaffold1.1_33#0
H	11107	291	99.7	+	0	0	447I121MI170M665I	NODE_4_length_1108_cov_67.821297#0	Tepidibacter_thalassicus_strain_SC_562_(NR_025678.1)	45						H	1	150	97.6	-	0	0	26D124M168I	RM2|S1|R24340663/2	scaffold1.1_33#0
H	5549	292	99.3	+	0	0	444I292M672I	scaffold00047_27#0	Tessaracoccus_flavescens_strain_SST-39_(NR_042550.1)	7.25						H	1	150	97.7	+	0	0	164I128M22D	RM2|S1|R14639038/2	scaffold1.1_33#0
H	5549	292	99.3	+	0	0	444I292M672I	scaffold00127_4#0	Tessaracoccus_flavescens_strain_SST-39_(NR_042550.1)							H	1	150	97.7	+	0	0	19D131M161I	RM2|S2|R16314378/2	scaffold1.1_33#0
H	6418	292	100	+	0	0	479I292M704I	scaffold3.1_17#0	Variovorax_boronicumulans_strain_BAM-48_(NR_041588.1)	23						H	1	150	97.7	+	0	0	206I86M64D	RM2|S1|R181366/2	scaffold1.1_33#0
H	6418	292	100	+	0	0	479I292M704I	scaffold2.1_41#0	Variovorax_boronicumulans_strain_BAM-48_(NR_041588.1)							H	1	150	97.7	+	0	0	62D88M204I	RM2|S1|R6860287/2	scaffold1.1_33#0
H	8111	292	99.3	+	0	0	471I292M720I	scaffold9.1_31#0	Variovorax_paradoxus_strain_13-0-1D_(NR_036930.1)	8.5						H	1	150	97.7	+	0	0	63D87M205I	RM2|S2|R4732569/1	scaffold1.1_33#0
H	10497	292	100	+	0	0	421I292M699I	scaffold00036_25#0	Xanthobacter_autotrophicus_strain_7c_(NR_026308.1)	7.5						H	1	150	97.7	-	0	0	17D133M159I	RM2|S1|R48309079/2	scaffold1.1_33#0
																H	1	150	97.7	-	0	0	20D130M162I	RM2|S2|R13077688/1	scaffold1.1_33#0
																H	1	150	97.7	-	0	0	64D86M206I	RM2|S2|R41640768/2	scaffold1.1_33#0
																H	1	150	97.7	-	0	0	64D86M206I	RM2|S2|R9101354/2	scaffold1.1_33#0
																H	1	150	97.8	+	0	0	153I139M11D	RM2|S1|R45220853/1	scaffold1.1_33#0
																H	1	150	97.8	+	0	0	154I138M12D	RM2|S1|R37656369/2	scaffold1.1_33#0
																H	1	150	97.8	+	0	0	158I134M16D	RM2|S2|R21822048/1	scaffold1.1_33#0
																H	1	150	97.8	+	0	0	16D134M158I	RM2|S1|R22122297/2	scaffold1.1_33#0
																H	1	150	97.8	+	0	0	199I93M57D	RM2|S1|R13190051/2	scaffold1.1_33#0
																H	1	150	97.8	+	0	0	201I91M59D	RM2|S1|R25563500/1	scaffold1.1_33#0
																H	1	150	97.8	+	0	0	57D93M199I	RM2|S1|R20794892/1	scaffold1.1_33#0
																H	1	150	97.8	-	0	0	15D135M157I	RM2|S2|R42646408/2	scaffold1.1_33#0
																H	1	150	97.8	-	0	0	60D90M202I	RM2|S1|R32922573/2	scaffold1.1_33#0
																H	1	150	97.9	+	0	0	150I142M8D	RM2|S1|R913301/1	scaffold1.1_33#0
																H	1	150	97.9	+	0	0	195I97M53D	RM2|S1|R2887792/1	scaffold1.1_33#0
																H	1	150	97.9	-	0	0	197I95M55D	RM2|S2|R3029425/1	scaffold1.1_33#0
																H	1	150	97.9	-	0	0	56D94M198I	RM2|S1|R15895553/1	scaffold1.1_33#0
																H	1	150	97.9	-	0	0	7D143M149I	RM2|S1|R48112539/2	scaffold1.1_33#0
																H	1	150	98	+	0	0	123I150M19I	RM2|S1|R26581622/2	scaffold1.1_33#0
																H	1	150	98	+	0	0	125I150M17I	RM2|S1|R19625886/1	scaffold1.1_33#0
																H	1	150	98	+	0	0	126I150M16I	RM2|S1|R10489432/1	scaffold1.1_33#0
																H	1	150	98	+	0	0	128I150M14I	RM2|S2|R18864761/1	scaffold1.1_33#0
																H	1	150	98	+	0	0	131I150M11I	RM2|S1|R32911297/1	scaffold1.1_33#0
																H	1	150	98	+	0	0	134I150M8I	RM2|S1|R7091050/2	scaffold1.1_33#0
																H	1	150	98	+	0	0	143I149MD	RM2|S2|R34663643/1	scaffold1.1_33#0
																H	1	150	98	+	0	0	14I150M128I	RM2|S2|R36673955/2	scaffold1.1_33#0
																H	1	150	98	+	0	0	191I101M49D	RM2|S1|R30872319/1	scaffold1.1_33#0
																H	1	150	98	+	0	0	40I150M102I	RM2|S1|R30993451/1	scaffold1.1_33#0
																H	1	150	98	+	0	0	49I150M93I	RM2|S2|R42731927/2	scaffold1.1_33#0
																H	1	150	98	+	0	0	55I150M87I	RM2|S2|R28050481/2	scaffold1.1_33#0
																H	1	150	98	+	0	0	57I150M85I	RM2|S1|R27608157/1	scaffold1.1_33#0
																H	1	150	98	+	0	0	58I150M84I	RM2|S1|R32520138/1	scaffold1.1_33#0
																H	1	150	98	+	0	0	81I150M61I	RM2|S1|R779568/2	scaffold1.1_33#0
																H	1	150	98	+	0	0	91I150M51I	RM2|S2|R29346819/1	scaffold1.1_33#0
																H	1	150	98	-	0	0	10I150M132I	RM2|S1|R3040580/2	scaffold1.1_33#0
																H	1	150	98	-	0	0	110I150M32I	RM2|S1|R39184108/1	scaffold1.1_33#0
																H	1	150	98	-	0	0	117I150M25I	RM2|S1|R26370686/2	scaffold1.1_33#0
																H	1	150	98	-	0	0	118I150M24I	RM2|S1|R29651367/1	scaffold1.1_33#0
																H	1	150	98	-	0	0	126I150M16I	RM2|S2|R36673955/1	scaffold1.1_33#0
																H	1	150	98	-	0	0	135I150M7I	RM2|S1|R40417154/1	scaffold1.1_33#0
																H	1	150	98	-	0	0	150M142I	RM2|S1|R8192405/1	scaffold1.1_33#0
																H	1	150	98	-	0	0	18I150M124I	RM2|S1|R34620103/2	scaffold1.1_33#0
																H	1	150	98	-	0	0	18I150M124I	RM2|S2|R38099823/1	scaffold1.1_33#0
																H	1	150	98	-	0	0	21I150M121I	RM2|S2|R26291039/1	scaffold1.1_33#0
																H	1	150	98	-	0	0	36I150M106I	RM2|S1|R19899251/1	scaffold1.1_33#0
																H	1	150	98	-	0	0	3D147M145I	RM2|S2|R19716233/1	scaffold1.1_33#0
																H	1	150	98	-	0	0	48D102M190I	RM2|S1|R30410851/1	scaffold1.1_33#0
																H	1	150	98	-	0	0	49D101M191I	RM2|S2|R20591614/2	scaffold1.1_33#0
																H	1	150	98	-	0	0	52D98M194I	RM2|S1|R32226119/2	scaffold1.1_33#0
																H	1	150	98	-	0	0	54I150M88I	RM2|S1|R1223180/1	scaffold1.1_33#0
																H	1	150	98	-	0	0	56I150M86I	RM2|S1|R8432734/1	scaffold1.1_33#0
																H	1	150	98	-	0	0	63I150M79I	RM2|S1|R39175056/2	scaffold1.1_33#0
																H	1	150	98	-	0	0	80I150M62I	RM2|S1|R31496690/1	scaffold1.1_33#0
																H	1	150	98	-	0	0	82I150M60I	RM2|S1|R8275821/2	scaffold1.1_33#0
																H	1	150	98	-	0	0	83I150M59I	RM2|S1|R2741262/1	scaffold1.1_33#0
																H	1	150	98	-	0	0	88I150M54I	RM2|S1|R47601129/1	scaffold1.1_33#0
																H	1	150	98	-	0	0	91I150M51I	RM2|S1|R32398511/2	scaffold1.1_33#0
																H	1	150	98	-	0	0	94I150M48I	RM2|S2|R12792842/2	scaffold1.1_33#0
																H	1	150	98	-	0	0	D149M143I	RM2|S2|R20260415/2	scaffold1.1_33#0
																H	1	150	98.1	+	0	0	189I103M47D	RM2|S1|R48756492/2	scaffold1.1_33#0
																H	1	150	98.1	-	0	0	186I106M44D	RM2|S1|R44191443/1	scaffold1.1_33#0
																H	1	150	98.1	-	0	0	188I104M46D	RM2|S1|R4688639/1	scaffold1.1_33#0
																H	1	150	98.1	-	0	0	42D108M184I	RM2|S2|R22078448/2	scaffold1.1_33#0
																H	1	150	98.2	+	0	0	181I111M39D	RM2|S1|R789998/2	scaffold1.1_33#0
																H	1	150	98.2	+	0	0	36D114M178I	RM2|S1|R44845995/1	scaffold1.1_33#0
																H	1	150	98.2	+	0	0	36D114M178I	RM2|S2|R12792842/1	scaffold1.1_33#0
																H	1	150	98.2	+	0	0	41D109M183I	RM2|S1|R8275821/1	scaffold1.1_33#0
																H	1	150	98.2	-	0	0	181I111M39D	RM2|S2|R1613831/1	scaffold1.1_33#0
																H	1	150	98.3	+	0	0	172I120M30D	RM2|S1|R20243284/2	scaffold1.1_33#0
																H	1	150	98.3	+	0	0	173I119M31D	RM2|S1|R25703991/1	scaffold1.1_33#0
																H	1	150	98.3	+	0	0	32D118M174I	RM2|S1|R19461880/1	scaffold1.1_33#0
																H	1	150	98.3	-	0	0	175I117M33D	RM2|S1|R36825454/1	scaffold1.1_33#0
																H	1	150	98.3	-	0	0	29D121M171I	RM2|S1|R20668344/2	scaffold1.1_33#0
																H	1	150	98.3	-	0	0	33D117M175I	RM2|S1|R33871775/2	scaffold1.1_33#0
																H	1	150	98.3	-	0	0	35D115M177I	RM2|S1|R40809315/2	scaffold1.1_33#0
																H	1	150	98.4	+	0	0	165I127M23D	RM2|S1|R7180694/1	scaffold1.1_33#0
																H	1	150	98.4	+	0	0	22D128M164I	RM2|S2|R37616330/2	scaffold1.1_33#0
																H	1	150	98.4	+	0	0	26D124M168I	RM2|S2|R20956870/1	scaffold1.1_33#0
																H	1	150	98.4	-	0	0	163I129M21D	RM2|S2|R18103847/1	scaffold1.1_33#0
																H	1	150	98.4	-	0	0	163I129M21D	RM2|S2|R43546425/2	scaffold1.1_33#0
																H	1	150	98.4	-	0	0	164I128M22D	RM2|S1|R30993451/2	scaffold1.1_33#0
																H	1	150	98.4	-	0	0	21D129M163I	RM2|S1|R12755547/1	scaffold1.1_33#0
																H	1	150	98.4	-	0	0	25D125M167I	RM2|S1|R43108464/2	scaffold1.1_33#0
																H	1	150	98.5	+	0	0	17D133M159I	RM2|S1|R19136853/1	scaffold1.1_33#0
																H	1	150	98.5	-	0	0	160I132M18D	RM2|S2|R28050481/1	scaffold1.1_33#0
																H	1	150	98.6	+	0	0	152I140M10D	RM2|S1|R12762053/1	scaffold1.1_33#0
																H	1	150	98.6	+	0	0	2D148M144I	RM2|S1|R29962793/1	scaffold1.1_33#0
																H	1	150	98.6	+	0	0	2D148M144I	RM2|S2|R46701681/1	scaffold1.1_33#0
																H	1	150	98.6	+	0	0	9D141M151I	RM2|S1|R45638275/1	scaffold1.1_33#0
																H	1	150	98.6	-	0	0	12D138M154I	RM2|S1|R2775707/1	scaffold1.1_33#0
																H	1	150	98.6	-	0	0	146I146M4D	RM2|S1|R14022085/2	scaffold1.1_33#0
																H	1	150	98.6	-	0	0	146I146M4D	RM2|S2|R11892816/2	scaffold1.1_33#0
																H	1	150	98.6	-	0	0	149I143M7D	RM2|S2|R48744456/1	scaffold1.1_33#0
																H	1	150	98.6	-	0	0	152I140M10D	RM2|S2|R10213025/1	scaffold1.1_33#0
																H	1	150	98.7	+	0	0	101I150M41I	RM2|S1|R43679115/1	scaffold1.1_33#0
																H	1	150	98.7	+	0	0	114I150M28I	RM2|S2|R15130743/1	scaffold1.1_33#0
																H	1	150	98.7	+	0	0	115I150M27I	RM2|S2|R3029425/2	scaffold1.1_33#0
																H	1	150	98.7	+	0	0	121I150M21I	RM2|S1|R22407828/2	scaffold1.1_33#0
																H	1	150	98.7	+	0	0	124I150M18I	RM2|S2|R9542145/1	scaffold1.1_33#0
																H	1	150	98.7	+	0	0	128I150M14I	RM2|S2|R36609320/1	scaffold1.1_33#0
																H	1	150	98.7	+	0	0	140I150M2I	RM2|S1|R8224497/1	scaffold1.1_33#0
																H	1	150	98.7	+	0	0	143I149MD	RM2|S2|R8834998/1	scaffold1.1_33#0
																H	1	150	98.7	+	0	0	20I150M122I	RM2|S1|R22949526/1	scaffold1.1_33#0
																H	1	150	98.7	+	0	0	28I150M114I	RM2|S2|R48021635/1	scaffold1.1_33#0
																H	1	150	98.7	+	0	0	45I150M97I	RM2|S1|R23488801/1	scaffold1.1_33#0
																H	1	150	98.7	+	0	0	45I150M97I	RM2|S2|R17254305/1	scaffold1.1_33#0
																H	1	150	98.7	+	0	0	46I150M96I	RM2|S2|R1613831/2	scaffold1.1_33#0
																H	1	150	98.7	+	0	0	52I150M90I	RM2|S1|R3303723/2	scaffold1.1_33#0
																H	1	150	98.7	+	0	0	54I150M88I	RM2|S1|R37712804/1	scaffold1.1_33#0
																H	1	150	98.7	+	0	0	59I150M83I	RM2|S1|R8609190/1	scaffold1.1_33#0
																H	1	150	98.7	+	0	0	74D76M216I	RM2|S1|R9683621/1	scaffold1.1_33#0
																H	1	150	98.7	+	0	0	75D75M217I	RM2|S1|R4104325/2	scaffold1.1_33#0
																H	1	150	98.7	+	0	0	86I150M56I	RM2|S1|R35760749/2	scaffold1.1_33#0
																H	1	150	98.7	+	0	0	88I150M54I	RM2|S1|R34963900/2	scaffold1.1_33#0
																H	1	150	98.7	+	0	0	90I150M52I	RM2|S1|R35440315/1	scaffold1.1_33#0
																H	1	150	98.7	+	0	0	D149M143I	RM2|S1|R32398511/1	scaffold1.1_33#0
																H	1	150	98.7	-	0	0	112I150M30I	RM2|S2|R7455436/1	scaffold1.1_33#0
																H	1	150	98.7	-	0	0	113I150M29I	RM2|S1|R6294710/1	scaffold1.1_33#0
																H	1	150	98.7	-	0	0	124I150M18I	RM2|S1|R29255799/1	scaffold1.1_33#0
																H	1	150	98.7	-	0	0	128I150M14I	RM2|S1|R29299986/1	scaffold1.1_33#0
																H	1	150	98.7	-	0	0	128I150M14I	RM2|S1|R32786277/2	scaffold1.1_33#0
																H	1	150	98.7	-	0	0	128I150M14I	RM2|S2|R17038686/2	scaffold1.1_33#0
																H	1	150	98.7	-	0	0	14I150M128I	RM2|S1|R37982715/1	scaffold1.1_33#0
																H	1	150	98.7	-	0	0	16I150M126I	RM2|S1|R17005995/1	scaffold1.1_33#0
																H	1	150	98.7	-	0	0	27I150M115I	RM2|S2|R14410767/1	scaffold1.1_33#0
																H	1	150	98.7	-	0	0	30I150M112I	RM2|S2|R19323704/2	scaffold1.1_33#0
																H	1	150	98.7	-	0	0	38I150M104I	RM2|S1|R7793502/1	scaffold1.1_33#0
																H	1	150	98.7	-	0	0	41I150M101I	RM2|S1|R28488054/1	scaffold1.1_33#0
																H	1	150	98.7	-	0	0	43I150M99I	RM2|S2|R33204774/1	scaffold1.1_33#0
																H	1	150	98.7	-	0	0	65I150M77I	RM2|S1|R44845995/2	scaffold1.1_33#0
																H	1	150	98.7	-	0	0	65I150M77I	RM2|S2|R45064443/2	scaffold1.1_33#0
																H	1	150	98.7	-	0	0	70I150M72I	RM2|S1|R11393757/1	scaffold1.1_33#0
																H	1	150	98.7	-	0	0	71D79M213I	RM2|S1|R3275739/1	scaffold1.1_33#0
																H	1	150	98.7	-	0	0	74D76M216I	RM2|S1|R23319856/2	scaffold1.1_33#0
																H	1	150	98.7	-	0	0	75D75M217I	RM2|S2|R27171842/1	scaffold1.1_33#0
																H	1	150	98.7	-	0	0	76I150M66I	RM2|S2|R13952005/1	scaffold1.1_33#0
																H	1	150	98.7	-	0	0	77I150M65I	RM2|S1|R41126983/1	scaffold1.1_33#0
																H	1	150	98.7	-	0	0	85I150M57I	RM2|S2|R21495292/1	scaffold1.1_33#0
																H	1	150	98.7	-	0	0	97I150M45I	RM2|S1|R17731374/2	scaffold1.1_33#0
																H	1	150	98.8	+	0	0	209I83M67D	RM2|S1|R47217799/2	scaffold1.1_33#0
																H	1	150	98.8	-	0	0	65D85M207I	RM2|S1|R15662306/2	scaffold1.1_33#0
																H	1	150	98.9	+	0	0	197I95M55D	RM2|S1|R15105794/1	scaffold1.1_33#0
																H	1	150	98.9	+	0	0	199I93M57D	RM2|S1|R24372880/2	scaffold1.1_33#0
																H	1	150	98.9	+	0	0	63D87M205I	RM2|S1|R39175056/1	scaffold1.1_33#0
																H	1	150	98.9	-	0	0	199I93M57D	RM2|S1|R27880945/1	scaffold1.1_33#0
																H	1	150	98.9	-	0	0	59D91M201I	RM2|S1|R18207253/2	scaffold1.1_33#0
																H	1	150	98.9	-	0	0	60D90M202I	RM2|S1|R15363314/1	scaffold1.1_33#0
																H	1	150	98.9	-	0	0	60D90M202I	RM2|S2|R48196561/2	scaffold1.1_33#0
																H	1	150	99	+	0	0	187I105M45D	RM2|S1|R18872711/1	scaffold1.1_33#0
																H	1	150	99	+	0	0	192I100M50D	RM2|S1|R48935293/1	scaffold1.1_33#0
																H	1	150	99	+	0	0	193I99M51D	RM2|S1|R26321394/1	scaffold1.1_33#0
																H	1	150	99	+	0	0	194I98M52D	RM2|S1|R49252739/1	scaffold1.1_33#0
																H	1	150	99	+	0	0	195I97M53D	RM2|S1|R2583519/2	scaffold1.1_33#0
																H	1	150	99	-	0	0	191I101M49D	RM2|S1|R24093345/1	scaffold1.1_33#0
																H	1	150	99	-	0	0	191I101M49D	RM2|S2|R42731927/1	scaffold1.1_33#0
																H	1	150	99	-	0	0	193I99M51D	RM2|S1|R39410692/1	scaffold1.1_33#0
																H	1	150	99	-	0	0	54D96M196I	RM2|S1|R9193079/2	scaffold1.1_33#0
																H	1	150	99.1	+	0	0	181I111M39D	RM2|S1|R21141108/1	scaffold1.1_33#0
																H	1	150	99.1	+	0	0	186I106M44D	RM2|S1|R20861005/2	scaffold1.1_33#0
																H	1	150	99.1	+	0	0	39D111M181I	RM2|S1|R34554385/1	scaffold1.1_33#0
																H	1	150	99.1	+	0	0	40D110M182I	RM2|S2|R7455436/2	scaffold1.1_33#0
																H	1	150	99.1	-	0	0	177I115M35D	RM2|S1|R21803602/1	scaffold1.1_33#0
																H	1	150	99.1	-	0	0	186I106M44D	RM2|S1|R22993630/1	scaffold1.1_33#0
																H	1	150	99.1	-	0	0	37D113M179I	RM2|S1|R40355612/1	scaffold1.1_33#0
																H	1	150	99.1	-	0	0	44D106M186I	RM2|S1|R22344366/2	scaffold1.1_33#0
																H	1	150	99.2	+	0	0	163I129M21D	RM2|S1|R17726725/1	scaffold1.1_33#0
																H	1	150	99.2	+	0	0	170I122M28D	RM2|S1|R18144262/1	scaffold1.1_33#0
																H	1	150	99.2	+	0	0	173I119M31D	RM2|S1|R18411642/1	scaffold1.1_33#0
																H	1	150	99.2	+	0	0	174I118M32D	RM2|S1|R23213960/2	scaffold1.1_33#0
																H	1	150	99.2	+	0	0	25D125M167I	RM2|S1|R8530818/1	scaffold1.1_33#0
																H	1	150	99.2	+	0	0	28D122M170I	RM2|S1|R32786277/1	scaffold1.1_33#0
																H	1	150	99.2	+	0	0	30D120M172I	RM2|S1|R7772924/1	scaffold1.1_33#0
																H	1	150	99.2	-	0	0	160I132M18D	RM2|S1|R8985642/2	scaffold1.1_33#0
																H	1	150	99.2	-	0	0	161I131M19D	RM2|S1|R38127011/2	scaffold1.1_33#0
																H	1	150	99.2	-	0	0	17D133M159I	RM2|S1|R33989437/2	scaffold1.1_33#0
																H	1	150	99.2	-	0	0	23D127M165I	RM2|S2|R10538375/1	scaffold1.1_33#0
																H	1	150	99.2	-	0	0	28D122M170I	RM2|S1|R1183751/2	scaffold1.1_33#0
																H	1	150	99.3	+	0	0	117I150M25I	RM2|S1|R29819139/1	scaffold1.1_33#0
																H	1	150	99.3	+	0	0	11I150M131I	RM2|S1|R32192037/1	scaffold1.1_33#0
																H	1	150	99.3	+	0	0	143I149MD	RM2|S2|R31206748/1	scaffold1.1_33#0
																H	1	150	99.3	+	0	0	151I141M9D	RM2|S1|R21950545/1	scaffold1.1_33#0
																H	1	150	99.3	+	0	0	156I136M14D	RM2|S1|R22386426/1	scaffold1.1_33#0
																H	1	150	99.3	+	0	0	20I150M122I	RM2|S1|R26370686/1	scaffold1.1_33#0
																H	1	150	99.3	+	0	0	21I150M121I	RM2|S1|R29299986/2	scaffold1.1_33#0
																H	1	150	99.3	+	0	0	25I150M117I	RM2|S1|R26537589/1	scaffold1.1_33#0
																H	1	150	99.3	+	0	0	27I150M115I	RM2|S2|R17038686/1	scaffold1.1_33#0
																H	1	150	99.3	+	0	0	28I150M114I	RM2|S1|R25117572/1	scaffold1.1_33#0
																H	1	150	99.3	+	0	0	28I150M114I	RM2|S1|R29942482/1	scaffold1.1_33#0
																H	1	150	99.3	+	0	0	40I150M102I	RM2|S1|R12947639/1	scaffold1.1_33#0
																H	1	150	99.3	+	0	0	63I150M79I	RM2|S2|R18528229/1	scaffold1.1_33#0
																H	1	150	99.3	+	0	0	77I150M65I	RM2|S1|R10932222/1	scaffold1.1_33#0
																H	1	150	99.3	+	0	0	96I150M46I	RM2|S1|R37254323/1	scaffold1.1_33#0
																H	1	150	99.3	-	0	0	101I150M41I	RM2|S1|R31375450/2	scaffold1.1_33#0
																H	1	150	99.3	-	0	0	10D140M152I	RM2|S1|R31511504/1	scaffold1.1_33#0
																H	1	150	99.3	-	0	0	127I150M15I	RM2|S2|R37616330/1	scaffold1.1_33#0
																H	1	150	99.3	-	0	0	134I150M8I	RM2|S1|R26512028/1	scaffold1.1_33#0
																H	1	150	99.3	-	0	0	13D137M155I	RM2|S1|R44808910/2	scaffold1.1_33#0
																H	1	150	99.3	-	0	0	146I146M4D	RM2|S1|R26916701/1	scaffold1.1_33#0
																H	1	150	99.3	-	0	0	149I143M7D	RM2|S1|R43712599/2	scaffold1.1_33#0
																H	1	150	99.3	-	0	0	14I150M128I	RM2|S1|R6860287/1	scaffold1.1_33#0
																H	1	150	99.3	-	0	0	155I137M13D	RM2|S2|R13437355/1	scaffold1.1_33#0
																H	1	150	99.3	-	0	0	158I134M16D	RM2|S1|R48448436/1	scaffold1.1_33#0
																H	1	150	99.3	-	0	0	16I150M126I	RM2|S1|R19706858/2	scaffold1.1_33#0
																H	1	150	99.3	-	0	0	5I150M137I	RM2|S1|R27822348/1	scaffold1.1_33#0
																H	1	150	99.3	-	0	0	6D144M148I	RM2|S2|R11710149/1	scaffold1.1_33#0
																H	1	150	99.3	-	0	0	74I150M68I	RM2|S1|R36195301/2	scaffold1.1_33#0
																H	1	150	99.3	-	0	0	75I150M67I	RM2|S2|R15646647/1	scaffold1.1_33#0
																H	1	150	99.3	-	0	0	88I150M54I	RM2|S1|R42080024/2	scaffold1.1_33#0
																H	1	150	99.3	-	0	0	8I150M134I	RM2|S1|R8254311/2	scaffold1.1_33#0
																H	10	150	100	+	0	0	101I150M41I	RM2|S1|R26130264/2	scaffold00003_27#0
																H	10	150	100	+	0	0	105I150M37I	RM2|S1|R32187591/2	scaffold00003_27#0
																H	10	150	100	+	0	0	166I126M24D	RM2|S1|R12089594/2	scaffold00003_27#0
																H	10	150	100	+	0	0	167I125M25D	RM2|S1|R44696900/1	scaffold00003_27#0
																H	10	150	100	+	0	0	170I122M28D	RM2|S1|R44656214/1	scaffold00003_27#0
																H	10	150	100	+	0	0	171I121M29D	RM2|S1|R40071761/1	scaffold00003_27#0
																H	10	150	100	+	0	0	175I117M33D	RM2|S1|R17423329/1	scaffold00003_27#0
																H	10	150	100	+	0	0	176I116M34D	RM2|S1|R26300620/1	scaffold00003_27#0
																H	10	150	100	+	0	0	179I113M37D	RM2|S1|R10360558/1	scaffold00003_27#0
																H	10	150	100	+	0	0	179I113M37D	RM2|S2|R6736246/1	scaffold00003_27#0
																H	10	150	100	+	0	0	17D133M159I	RM2|S1|R15647831/1	scaffold00003_27#0
																H	10	150	100	+	0	0	180I112M38D	RM2|S2|R12080699/2	scaffold00003_27#0
																H	10	150	100	+	0	0	186I106M44D	RM2|S1|R40292296/1	scaffold00003_27#0
																H	10	150	100	+	0	0	186I106M44D	RM2|S1|R45859888/2	scaffold00003_27#0
																H	10	150	100	+	0	0	190I102M48D	RM2|S1|R11836670/1	scaffold00003_27#0
																H	10	150	100	+	0	0	199I93M57D	RM2|S1|R44743760/1	scaffold00003_27#0
																H	10	150	100	+	0	0	199I93M57D	RM2|S1|R9869949/1	scaffold00003_27#0
																H	10	150	100	+	0	0	201I91M59D	RM2|S1|R427336/1	scaffold00003_27#0
																H	10	150	100	+	0	0	202I90M60D	RM2|S1|R46511381/2	scaffold00003_27#0
																H	10	150	100	+	0	0	206I86M64D	RM2|S1|R28730371/1	scaffold00003_27#0
																H	10	150	100	+	0	0	208I84M66D	RM2|S1|R18227624/1	scaffold00003_27#0
																H	10	150	100	+	0	0	208I84M66D	RM2|S1|R29381163/1	scaffold00003_27#0
																H	10	150	100	+	0	0	211I81M69D	RM2|S1|R39664987/1	scaffold00003_27#0
																H	10	150	100	+	0	0	212I80M70D	RM2|S1|R31842252/1	scaffold00003_27#0
																H	10	150	100	+	0	0	213I79M71D	RM2|S1|R3589526/1	scaffold00003_27#0
																H	10	150	100	+	0	0	215I77M73D	RM2|S1|R13206338/1	scaffold00003_27#0
																H	10	150	100	+	0	0	217I75M75D	RM2|S1|R37753150/2	scaffold00003_27#0
																H	10	150	100	+	0	0	217I75M75D	RM2|S2|R9819941/2	scaffold00003_27#0
																H	10	150	100	+	0	0	30I150M112I	RM2|S1|R25434196/1	scaffold00003_27#0
																H	10	150	100	+	0	0	33D117M175I	RM2|S1|R142407/1	scaffold00003_27#0
																H	10	150	100	+	0	0	36D114M178I	RM2|S1|R27073764/1	scaffold00003_27#0
																H	10	150	100	+	0	0	42I150M100I	RM2|S1|R28810528/1	scaffold00003_27#0
																H	10	150	100	+	0	0	4I150M138I	RM2|S1|R10307388/1	scaffold00003_27#0
																H	10	150	100	+	0	0	51D99M193I	RM2|S1|R44307847/2	scaffold00003_27#0
																H	10	150	100	+	0	0	52D98M194I	RM2|S1|R24972290/1	scaffold00003_27#0
																H	10	150	100	+	0	0	64D86M206I	RM2|S1|R10756486/1	scaffold00003_27#0
																H	10	150	100	+	0	0	71D79M213I	RM2|S1|R7678443/2	scaffold00003_27#0
																H	10	150	100	+	0	0	76I150M66I	RM2|S1|R30801647/1	scaffold00003_27#0
																H	10	150	100	+	0	0	88I150M54I	RM2|S1|R36993765/1	scaffold00003_27#0
																H	10	150	100	-	0	0	113I150M29I	RM2|S1|R10100841/1	scaffold00003_27#0
																H	10	150	100	-	0	0	124I150M18I	RM2|S1|R41329565/1	scaffold00003_27#0
																H	10	150	100	-	0	0	126I150M16I	RM2|S1|R32755677/1	scaffold00003_27#0
																H	10	150	100	-	0	0	145I147M3D	RM2|S1|R25434196/2	scaffold00003_27#0
																H	10	150	100	-	0	0	150I142M8D	RM2|S1|R48551375/1	scaffold00003_27#0
																H	10	150	100	-	0	0	160I132M18D	RM2|S1|R8537850/2	scaffold00003_27#0
																H	10	150	100	-	0	0	172I120M30D	RM2|S1|R11904591/1	scaffold00003_27#0
																H	10	150	100	-	0	0	174I118M32D	RM2|S1|R3662459/1	scaffold00003_27#0
																H	10	150	100	-	0	0	177I115M35D	RM2|S1|R6369917/1	scaffold00003_27#0
																H	10	150	100	-	0	0	194I98M52D	RM2|S1|R4777905/2	scaffold00003_27#0
																H	10	150	100	-	0	0	206I86M64D	RM2|S1|R27495084/1	scaffold00003_27#0
																H	10	150	100	-	0	0	20D130M162I	RM2|S1|R1565236/1	scaffold00003_27#0
																H	10	150	100	-	0	0	213I79M71D	RM2|S1|R38940964/1	scaffold00003_27#0
																H	10	150	100	-	0	0	214I78M72D	RM2|S1|R340121/1	scaffold00003_27#0
																H	10	150	100	-	0	0	216I76M74D	RM2|S1|R186205/1	scaffold00003_27#0
																H	10	150	100	-	0	0	21D129M163I	RM2|S1|R14809820/2	scaffold00003_27#0
																H	10	150	100	-	0	0	21I150M121I	RM2|S1|R32962669/1	scaffold00003_27#0
																H	10	150	100	-	0	0	24D126M166I	RM2|S1|R40600990/1	scaffold00003_27#0
																H	10	150	100	-	0	0	40I150M102I	RM2|S1|R47350796/1	scaffold00003_27#0
																H	10	150	100	-	0	0	46D104M188I	RM2|S1|R47130658/1	scaffold00003_27#0
																H	10	150	100	-	0	0	49D101M191I	RM2|S1|R25817590/1	scaffold00003_27#0
																H	10	150	100	-	0	0	49I150M93I	RM2|S2|R26206091/1	scaffold00003_27#0
																H	10	150	100	-	0	0	4D146M146I	RM2|S1|R8243736/2	scaffold00003_27#0
																H	10	150	100	-	0	0	50I150M92I	RM2|S1|R30123187/1	scaffold00003_27#0
																H	10	150	100	-	0	0	51D99M193I	RM2|S1|R29927187/1	scaffold00003_27#0
																H	10	150	100	-	0	0	52D98M194I	RM2|S1|R31844520/2	scaffold00003_27#0
																H	10	150	100	-	0	0	52D98M194I	RM2|S2|R45342498/2	scaffold00003_27#0
																H	10	150	100	-	0	0	53D97M195I	RM2|S1|R40716221/1	scaffold00003_27#0
																H	10	150	100	-	0	0	54D96M196I	RM2|S1|R11616529/1	scaffold00003_27#0
																H	10	150	100	-	0	0	60D90M202I	RM2|S1|R49691226/1	scaffold00003_27#0
																H	10	150	100	-	0	0	67D83M209I	RM2|S1|R31082832/1	scaffold00003_27#0
																H	10	150	100	-	0	0	71D79M213I	RM2|S1|R14332738/1	scaffold00003_27#0
																H	10	150	100	-	0	0	71D79M213I	RM2|S1|R18594552/1	scaffold00003_27#0
																H	10	150	100	-	0	0	71D79M213I	RM2|S1|R23921097/1	scaffold00003_27#0
																H	10	150	100	-	0	0	73D77M215I	RM2|S1|R38819397/1	scaffold00003_27#0
																H	10	150	100	-	0	0	76I150M66I	RM2|S1|R33367459/1	scaffold00003_27#0
																H	10	150	97	+	0	0	191I101M49D	RM2|S1|R13531442/2	scaffold00003_27#0
																H	10	150	97	-	0	0	191I101M49D	RM2|S1|R1475287/1	scaffold00003_27#0
																H	10	150	97	-	0	0	192I100M50D	RM2|S1|R42111711/1	scaffold00003_27#0
																H	10	150	97	-	0	0	49D101M191I	RM2|S1|R26719979/2	scaffold00003_27#0
																H	10	150	97	-	0	0	50D100M192I	RM2|S1|R27824518/2	scaffold00003_27#0
																H	10	150	97.1	+	0	0	13D137M155I	RM2|S2|R35796267/2	scaffold00003_27#0
																H	10	150	97.1	+	0	0	153I139M11D	RM2|S1|R45935351/2	scaffold00003_27#0
																H	10	150	97.1	+	0	0	188I104M46D	RM2|S1|R12578741/1	scaffold00003_27#0
																H	10	150	97.1	+	0	0	190I102M48D	RM2|S1|R36127093/1	scaffold00003_27#0
																H	10	150	97.1	-	0	0	152I140M10D	RM2|S1|R15647831/2	scaffold00003_27#0
																H	10	150	97.1	-	0	0	187I105M45D	RM2|S1|R43888393/1	scaffold00003_27#0
																H	10	150	97.1	-	0	0	188I104M46D	RM2|S1|R19087207/2	scaffold00003_27#0
																H	10	150	97.2	+	0	0	147I145M5D	RM2|S1|R27695144/2	scaffold00003_27#0
																H	10	150	97.2	+	0	0	147I145M5D	RM2|S1|R5848549/2	scaffold00003_27#0
																H	10	150	97.2	+	0	0	149I143M7D	RM2|S1|R16469324/1	scaffold00003_27#0
																H	10	150	97.2	+	0	0	183I109M41D	RM2|S1|R27632411/2	scaffold00003_27#0
																H	10	150	97.2	+	0	0	184I108M42D	RM2|S1|R26105167/2	scaffold00003_27#0
																H	10	150	97.2	+	0	0	186I106M44D	RM2|S1|R25709412/1	scaffold00003_27#0
																H	10	150	97.2	+	0	0	186I106M44D	RM2|S1|R37805429/1	scaffold00003_27#0
																H	10	150	97.2	+	0	0	42D108M184I	RM2|S1|R3095452/1	scaffold00003_27#0
																H	10	150	97.2	+	0	0	9D141M151I	RM2|S1|R13706145/2	scaffold00003_27#0
																H	10	150	97.2	-	0	0	183I109M41D	RM2|S1|R45548783/2	scaffold00003_27#0
																H	10	150	97.2	-	0	0	186I106M44D	RM2|S1|R26127652/2	scaffold00003_27#0
																H	10	150	97.2	-	0	0	5D145M147I	RM2|S1|R1545685/2	scaffold00003_27#0
																H	10	150	97.2	-	0	0	7D143M149I	RM2|S1|R23612582/2	scaffold00003_27#0
																H	10	150	97.2	-	0	0	7D143M149I	RM2|S1|R26573344/2	scaffold00003_27#0
																H	10	150	97.2	-	0	0	9D141M151I	RM2|S1|R45453315/2	scaffold00003_27#0
																H	10	150	97.3	+	0	0	100I150M42I	RM2|S1|R33028957/2	scaffold00003_27#0
																H	10	150	97.3	+	0	0	107I150M35I	RM2|S1|R12158568/1	scaffold00003_27#0
																H	10	150	97.3	+	0	0	115I150M27I	RM2|S1|R31194251/2	scaffold00003_27#0
																H	10	150	97.3	+	0	0	116I150M26I	RM2|S1|R1796955/2	scaffold00003_27#0
																H	10	150	97.3	+	0	0	120I150M22I	RM2|S1|R24489719/2	scaffold00003_27#0
																H	10	150	97.3	+	0	0	123I150M19I	RM2|S1|R20976643/1	scaffold00003_27#0
																H	10	150	97.3	+	0	0	127I150M15I	RM2|S1|R29042830/1	scaffold00003_27#0
																H	10	150	97.3	+	0	0	128I150M14I	RM2|S1|R12607981/2	scaffold00003_27#0
																H	10	150	97.3	+	0	0	129I150M13I	RM2|S1|R1519067/2	scaffold00003_27#0
																H	10	150	97.3	+	0	0	134I150M8I	RM2|S1|R33726304/2	scaffold00003_27#0
																H	10	150	97.3	+	0	0	143I149MD	RM2|S1|R11663481/2	scaffold00003_27#0
																H	10	150	97.3	+	0	0	16I150M126I	RM2|S1|R9207907/2	scaffold00003_27#0
																H	10	150	97.3	+	0	0	17I150M125I	RM2|S1|R12720447/2	scaffold00003_27#0
																H	10	150	97.3	+	0	0	17I150M125I	RM2|S1|R535359/1	scaffold00003_27#0
																H	10	150	97.3	+	0	0	2D148M144I	RM2|S1|R18672281/2	scaffold00003_27#0
																H	10	150	97.3	+	0	0	31I150M111I	RM2|S1|R44179780/2	scaffold00003_27#0
																H	10	150	97.3	+	0	0	37D113M179I	RM2|S1|R6392132/2	scaffold00003_27#0
																H	10	150	97.3	+	0	0	44I150M98I	RM2|S1|R32755677/2	scaffold00003_27#0
																H	10	150	97.3	+	0	0	47I150M95I	RM2|S1|R42671453/2	scaffold00003_27#0
																H	10	150	97.3	+	0	0	48I150M94I	RM2|S1|R1386914/2	scaffold00003_27#0
																H	10	150	97.3	+	0	0	48I150M94I	RM2|S1|R39247367/2	scaffold00003_27#0
																H	10	150	97.3	+	0	0	52I150M90I	RM2|S1|R9283508/1	scaffold00003_27#0
																H	10	150	97.3	+	0	0	56I150M86I	RM2|S1|R22133892/2	scaffold00003_27#0
																H	10	150	97.3	+	0	0	5I150M137I	RM2|S1|R48551375/2	scaffold00003_27#0
																H	10	150	97.3	+	0	0	63I150M79I	RM2|S1|R21566188/2	scaffold00003_27#0
																H	10	150	97.3	+	0	0	63I150M79I	RM2|S1|R4783128/1	scaffold00003_27#0
																H	10	150	97.3	+	0	0	68I150M74I	RM2|S1|R32214141/1	scaffold00003_27#0
																H	10	150	97.3	+	0	0	69I150M73I	RM2|S1|R39910812/2	scaffold00003_27#0
																H	10	150	97.3	+	0	0	6I150M136I	RM2|S1|R44192680/1	scaffold00003_27#0
																H	10	150	97.3	+	0	0	70I150M72I	RM2|S1|R46806415/2	scaffold00003_27#0
																H	10	150	97.3	+	0	0	80I150M62I	RM2|S1|R33151686/2	scaffold00003_27#0
																H	10	150	97.3	+	0	0	81I150M61I	RM2|S1|R26779819/2	scaffold00003_27#0
																H	10	150	97.3	+	0	0	82I150M60I	RM2|S1|R1985854/1	scaffold00003_27#0
																H	10	150	97.3	+	0	0	84I150M58I	RM2|S1|R24147895/1	scaffold00003_27#0
																H	10	150	97.3	+	0	0	86I150M56I	RM2|S1|R46753610/2	scaffold00003_27#0
																H	10	150	97.3	+	0	0	91I150M51I	RM2|S1|R238301/1	scaffold00003_27#0
																H	10	150	97.3	+	0	0	96I150M46I	RM2|S1|R7094830/1	scaffold00003_27#0
																H	10	150	97.3	-	0	0	101I150M41I	RM2|S1|R1246680/2	scaffold00003_27#0
																H	10	150	97.3	-	0	0	103I150M39I	RM2|S1|R7804366/2	scaffold00003_27#0
																H	10	150	97.3	-	0	0	113I150M29I	RM2|S1|R15739421/1	scaffold00003_27#0
																H	10	150	97.3	-	0	0	114I150M28I	RM2|S1|R25629891/2	scaffold00003_27#0
																H	10	150	97.3	-	0	0	116I150M26I	RM2|S1|R46313062/2	scaffold00003_27#0
																H	10	150	97.3	-	0	0	119I150M23I	RM2|S1|R25787314/2	scaffold00003_27#0
																H	10	150	97.3	-	0	0	122I150M20I	RM2|S1|R39327840/1	scaffold00003_27#0
																H	10	150	97.3	-	0	0	138I150M4I	RM2|S1|R1366385/1	scaffold00003_27#0
																H	10	150	97.3	-	0	0	140I150M2I	RM2|S1|R33151686/1	scaffold00003_27#0
																H	10	150	97.3	-	0	0	179I113M37D	RM2|S1|R27010656/1	scaffold00003_27#0
																H	10	150	97.3	-	0	0	20I150M122I	RM2|S1|R15880955/1	scaffold00003_27#0
																H	10	150	97.3	-	0	0	217I75M75D	RM2|S1|R33868327/2	scaffold00003_27#0
																H	10	150	97.3	-	0	0	27I150M115I	RM2|S1|R40089276/1	scaffold00003_27#0
																H	10	150	97.3	-	0	0	28I150M114I	RM2|S1|R7371790/2	scaffold00003_27#0
																H	10	150	97.3	-	0	0	31I150M111I	RM2|S1|R28170540/2	scaffold00003_27#0
																H	10	150	97.3	-	0	0	32I150M110I	RM2|S1|R42073811/2	scaffold00003_27#0
																H	10	150	97.3	-	0	0	34I150M108I	RM2|S1|R35973961/1	scaffold00003_27#0
																H	10	150	97.3	-	0	0	37D113M179I	RM2|S1|R1753956/1	scaffold00003_27#0
																H	10	150	97.3	-	0	0	39I150M103I	RM2|S1|R18352198/2	scaffold00003_27#0
																H	10	150	97.3	-	0	0	3D147M145I	RM2|S1|R16102142/1	scaffold00003_27#0
																H	10	150	97.3	-	0	0	40I150M102I	RM2|S1|R36919757/2	scaffold00003_27#0
																H	10	150	97.3	-	0	0	42I150M100I	RM2|S1|R32941077/1	scaffold00003_27#0
																H	10	150	97.3	-	0	0	43I150M99I	RM2|S1|R3354579/2	scaffold00003_27#0
																H	10	150	97.3	-	0	0	4I150M138I	RM2|S1|R17828871/2	scaffold00003_27#0
																H	10	150	97.3	-	0	0	53I150M89I	RM2|S1|R142407/2	scaffold00003_27#0
																H	10	150	97.3	-	0	0	5I150M137I	RM2|S1|R11634328/2	scaffold00003_27#0
																H	10	150	97.3	-	0	0	60I150M82I	RM2|S1|R45534942/2	scaffold00003_27#0
																H	10	150	97.3	-	0	0	61I150M81I	RM2|S1|R2985322/1	scaffold00003_27#0
																H	10	150	97.3	-	0	0	66I150M76I	RM2|S1|R41073823/2	scaffold00003_27#0
																H	10	150	97.3	-	0	0	67I150M75I	RM2|S1|R44307847/1	scaffold00003_27#0
																H	10	150	97.3	-	0	0	70I150M72I	RM2|S1|R33048899/2	scaffold00003_27#0
																H	10	150	97.3	-	0	0	70I150M72I	RM2|S1|R6392132/1	scaffold00003_27#0
																H	10	150	97.3	-	0	0	74I150M68I	RM2|S1|R46697959/2	scaffold00003_27#0
																H	10	150	97.3	-	0	0	81I150M61I	RM2|S1|R41312918/1	scaffold00003_27#0
																H	10	150	97.3	-	0	0	84I150M58I	RM2|S1|R24972290/2	scaffold00003_27#0
																H	10	150	97.3	-	0	0	85I150M57I	RM2|S1|R22643694/1	scaffold00003_27#0
																H	10	150	97.3	-	0	0	86I150M56I	RM2|S1|R49120853/2	scaffold00003_27#0
																H	10	150	97.3	-	0	0	88I150M54I	RM2|S2|R34069546/2	scaffold00003_27#0
																H	10	150	97.3	-	0	0	91I150M51I	RM2|S1|R38066150/1	scaffold00003_27#0
																H	10	150	97.4	+	0	0	33D117M175I	RM2|S1|R23224911/1	scaffold00003_27#0
																H	10	150	97.4	+	0	0	33D117M175I	RM2|S1|R7804366/1	scaffold00003_27#0
																H	10	150	97.4	+	0	0	35D115M177I	RM2|S1|R25629891/1	scaffold00003_27#0
																H	10	150	97.4	-	0	0	215I77M73D	RM2|S1|R4832491/1	scaffold00003_27#0
																H	10	150	97.4	-	0	0	36D114M178I	RM2|S1|R41542427/1	scaffold00003_27#0
																H	10	150	97.5	+	0	0	171I121M29D	RM2|S1|R25909096/2	scaffold00003_27#0
																H	10	150	97.5	+	0	0	173I119M31D	RM2|S1|R2957341/2	scaffold00003_27#0
																H	10	150	97.5	+	0	0	30D120M172I	RM2|S1|R29805896/1	scaffold00003_27#0
																H	10	150	97.5	+	0	0	70D80M212I	RM2|S1|R17828871/1	scaffold00003_27#0
																H	10	150	97.5	-	0	0	171I121M29D	RM2|S1|R47673024/2	scaffold00003_27#0
																H	10	150	97.5	-	0	0	173I119M31D	RM2|S1|R36143955/2	scaffold00003_27#0
																H	10	150	97.5	-	0	0	212I80M70D	RM2|S1|R7083596/1	scaffold00003_27#0
																H	10	150	97.5	-	0	0	70D80M212I	RM2|S1|R41651771/2	scaffold00003_27#0
																H	10	150	97.6	+	0	0	167I125M25D	RM2|S1|R12168098/2	scaffold00003_27#0
																H	10	150	97.6	+	0	0	210I82M68D	RM2|S1|R33583563/2	scaffold00003_27#0
																H	10	150	97.6	+	0	0	210I82M68D	RM2|S1|R7932284/2	scaffold00003_27#0
																H	10	150	97.6	+	0	0	67D83M209I	RM2|S1|R23741997/2	scaffold00003_27#0
																H	10	150	97.6	+	0	0	67D83M209I	RM2|S1|R29995153/2	scaffold00003_27#0
																H	10	150	97.6	-	0	0	166I126M24D	RM2|S1|R24522477/1	scaffold00003_27#0
																H	10	150	97.6	-	0	0	166I126M24D	RM2|S1|R48685602/2	scaffold00003_27#0
																H	10	150	97.6	-	0	0	208I84M66D	RM2|S1|R49374234/1	scaffold00003_27#0
																H	10	150	97.6	-	0	0	23D127M165I	RM2|S1|R12839647/2	scaffold00003_27#0
																H	10	150	97.6	-	0	0	27D123M169I	RM2|S1|R15572324/1	scaffold00003_27#0
																H	10	150	97.7	+	0	0	162I130M20D	RM2|S1|R27401734/2	scaffold00003_27#0
																H	10	150	97.7	+	0	0	62D88M204I	RM2|S1|R32684677/1	scaffold00003_27#0
																H	10	150	97.7	+	0	0	62D88M204I	RM2|S1|R4159576/2	scaffold00003_27#0
																H	10	150	97.7	+	0	0	64D86M206I	RM2|S1|R48673403/1	scaffold00003_27#0
																H	10	150	97.7	-	0	0	163I129M21D	RM2|S1|R24201206/1	scaffold00003_27#0
																H	10	150	97.7	-	0	0	163I129M21D	RM2|S1|R37353306/2	scaffold00003_27#0
																H	10	150	97.7	-	0	0	204I88M62D	RM2|S1|R42671453/1	scaffold00003_27#0
																H	10	150	97.7	-	0	0	20D130M162I	RM2|S1|R33672297/2	scaffold00003_27#0
																H	10	150	97.7	-	0	0	20D130M162I	RM2|S1|R37859559/2	scaffold00003_27#0
																H	10	150	97.8	+	0	0	12D138M154I	RM2|S1|R10543778/2	scaffold00003_27#0
																H	10	150	97.8	+	0	0	14D136M156I	RM2|S1|R49405215/1	scaffold00003_27#0
																H	10	150	97.8	+	0	0	199I93M57D	RM2|S1|R7244026/2	scaffold00003_27#0
																H	10	150	97.8	+	0	0	201I91M59D	RM2|S1|R2011490/1	scaffold00003_27#0
																H	10	150	97.8	+	0	0	201I91M59D	RM2|S1|R3739108/2	scaffold00003_27#0
																H	10	150	97.8	-	0	0	14D136M156I	RM2|S1|R4322402/2	scaffold00003_27#0
																H	10	150	97.8	-	0	0	155I137M13D	RM2|S1|R1386914/1	scaffold00003_27#0
																H	10	150	97.8	-	0	0	57D93M199I	RM2|S1|R10673326/1	scaffold00003_27#0
																H	10	150	97.8	-	0	0	60D90M202I	RM2|S1|R33125165/1	scaffold00003_27#0
																H	10	150	97.9	+	0	0	147I145M5D	RM2|S1|R46957823/2	scaffold00003_27#0
																H	10	150	97.9	+	0	0	152I140M10D	RM2|S1|R39629908/2	scaffold00003_27#0
																H	10	150	97.9	+	0	0	195I97M53D	RM2|S1|R28507602/2	scaffold00003_27#0
																H	10	150	97.9	+	0	0	4D146M146I	RM2|S1|R13000665/2	scaffold00003_27#0
																H	10	150	97.9	+	0	0	54D96M196I	RM2|S1|R22286214/2	scaffold00003_27#0
																H	10	150	97.9	-	0	0	10D140M152I	RM2|S1|R2262332/2	scaffold00003_27#0
																H	10	150	97.9	-	0	0	148I144M6D	RM2|S1|R7270477/1	scaffold00003_27#0
																H	10	150	97.9	-	0	0	150I142M8D	RM2|S1|R21706958/1	scaffold00003_27#0
																H	10	150	97.9	-	0	0	152I140M10D	RM2|S1|R1225032/1	scaffold00003_27#0
																H	10	150	97.9	-	0	0	195I97M53D	RM2|S1|R30801647/2	scaffold00003_27#0
																H	10	150	97.9	-	0	0	197I95M55D	RM2|S1|R15790946/1	scaffold00003_27#0
																H	10	150	97.9	-	0	0	53D97M195I	RM2|S1|R39503853/2	scaffold00003_27#0
																H	10	150	97.9	-	0	0	8D142M150I	RM2|S1|R26759072/1	scaffold00003_27#0
																H	10	150	98	+	0	0	110I150M32I	RM2|S1|R340121/2	scaffold00003_27#0
																H	10	150	98	+	0	0	113I150M29I	RM2|S1|R11580417/1	scaffold00003_27#0
																H	10	150	98	+	0	0	114I150M28I	RM2|S1|R15730001/2	scaffold00003_27#0
																H	10	150	98	+	0	0	114I150M28I	RM2|S1|R43489971/1	scaffold00003_27#0
																H	10	150	98	+	0	0	122I150M20I	RM2|S1|R21206109/1	scaffold00003_27#0
																H	10	150	98	+	0	0	128I150M14I	RM2|S1|R47203261/1	scaffold00003_27#0
																H	10	150	98	+	0	0	12I150M130I	RM2|S1|R37358014/2	scaffold00003_27#0
																H	10	150	98	+	0	0	130I150M12I	RM2|S1|R49365928/2	scaffold00003_27#0
																H	10	150	98	+	0	0	130I150M12I	RM2|S1|R5479115/1	scaffold00003_27#0
																H	10	150	98	+	0	0	134I150M8I	RM2|S1|R12556151/1	scaffold00003_27#0
																H	10	150	98	+	0	0	139I150M3I	RM2|S1|R48770494/2	scaffold00003_27#0
																H	10	150	98	+	0	0	140I150M2I	RM2|S1|R49480749/2	scaffold00003_27#0
																H	10	150	98	+	0	0	142I150M	RM2|S1|R4389591/2	scaffold00003_27#0
																H	10	150	98	+	0	0	14I150M128I	RM2|S1|R18918027/2	scaffold00003_27#0
																H	10	150	98	+	0	0	14I150M128I	RM2|S1|R23294157/1	scaffold00003_27#0
																H	10	150	98	+	0	0	193I99M51D	RM2|S1|R31049266/2	scaffold00003_27#0
																H	10	150	98	+	0	0	23I150M119I	RM2|S1|R25787314/1	scaffold00003_27#0
																H	10	150	98	+	0	0	25I150M117I	RM2|S1|R41329565/2	scaffold00003_27#0
																H	10	150	98	+	0	0	3I150M139I	RM2|S1|R7863244/2	scaffold00003_27#0
																H	10	150	98	+	0	0	41I150M101I	RM2|S1|R24522477/2	scaffold00003_27#0
																H	10	150	98	+	0	0	45I150M97I	RM2|S1|R25653249/2	scaffold00003_27#0
																H	10	150	98	+	0	0	48D102M190I	RM2|S1|R27178154/1	scaffold00003_27#0
																H	10	150	98	+	0	0	50I150M92I	RM2|S1|R10100841/2	scaffold00003_27#0
																H	10	150	98	+	0	0	50I150M92I	RM2|S1|R795081/1	scaffold00003_27#0
																H	10	150	98	+	0	0	51D99M193I	RM2|S1|R23986669/1	scaffold00003_27#0
																H	10	150	98	+	0	0	56I150M86I	RM2|S1|R1475287/2	scaffold00003_27#0
																H	10	150	98	+	0	0	56I150M86I	RM2|S1|R18718397/2	scaffold00003_27#0
																H	10	150	98	+	0	0	5I150M137I	RM2|S1|R24837768/2	scaffold00003_27#0
																H	10	150	98	+	0	0	61I150M81I	RM2|S1|R44332228/1	scaffold00003_27#0
																H	10	150	98	+	0	0	65I150M77I	RM2|S1|R32211290/2	scaffold00003_27#0
																H	10	150	98	+	0	0	76I150M66I	RM2|S1|R41690356/1	scaffold00003_27#0
																H	10	150	98	+	0	0	78I150M64I	RM2|S1|R15129703/2	scaffold00003_27#0
																H	10	150	98	+	0	0	78I150M64I	RM2|S1|R26042190/2	scaffold00003_27#0
																H	10	150	98	+	0	0	7I150M135I	RM2|S1|R28345817/1	scaffold00003_27#0
																H	10	150	98	+	0	0	82I150M60I	RM2|S1|R4832491/2	scaffold00003_27#0
																H	10	150	98	+	0	0	89I150M53I	RM2|S1|R12537128/2	scaffold00003_27#0
																H	10	150	98	+	0	0	92I150M50I	RM2|S1|R38116042/2	scaffold00003_27#0
																H	10	150	98	+	0	0	92I150M50I	RM2|S1|R7083596/2	scaffold00003_27#0
																H	10	150	98	+	0	0	94I150M48I	RM2|S1|R33868327/1	scaffold00003_27#0
																H	10	150	98	+	0	0	95I150M47I	RM2|S1|R45401849/1	scaffold00003_27#0
																H	10	150	98	+	0	0	98I150M44I	RM2|S1|R22902701/2	scaffold00003_27#0
																H	10	150	98	+	0	0	9I150M133I	RM2|S1|R45201648/1	scaffold00003_27#0
																H	10	150	98	+	0	0	9I150M133I	RM2|S1|R5453687/1	scaffold00003_27#0
																H	10	150	98	-	0	0	104I150M38I	RM2|S1|R26884937/2	scaffold00003_27#0
																H	10	150	98	-	0	0	105I150M37I	RM2|S1|R19687288/2	scaffold00003_27#0
																H	10	150	98	-	0	0	105I150M37I	RM2|S1|R45201648/2	scaffold00003_27#0
																H	10	150	98	-	0	0	107I150M35I	RM2|S1|R13706145/1	scaffold00003_27#0
																H	10	150	98	-	0	0	107I150M35I	RM2|S1|R37648565/1	scaffold00003_27#0
																H	10	150	98	-	0	0	110I150M32I	RM2|S1|R3280062/1	scaffold00003_27#0
																H	10	150	98	-	0	0	113I150M29I	RM2|S1|R26126130/1	scaffold00003_27#0
																H	10	150	98	-	0	0	117I150M25I	RM2|S1|R37358014/1	scaffold00003_27#0
																H	10	150	98	-	0	0	118I150M24I	RM2|S1|R21716195/2	scaffold00003_27#0
																H	10	150	98	-	0	0	122I150M20I	RM2|S2|R35796267/1	scaffold00003_27#0
																H	10	150	98	-	0	0	130I150M12I	RM2|S1|R3852042/2	scaffold00003_27#0
																H	10	150	98	-	0	0	136I150M6I	RM2|S1|R1519119/2	scaffold00003_27#0
																H	10	150	98	-	0	0	136I150M6I	RM2|S1|R5453687/2	scaffold00003_27#0
																H	10	150	98	-	0	0	138I150M4I	RM2|S1|R11541564/1	scaffold00003_27#0
																H	10	150	98	-	0	0	144I148M2D	RM2|S1|R5120285/2	scaffold00003_27#0
																H	10	150	98	-	0	0	145I147M3D	RM2|S1|R46496835/2	scaffold00003_27#0
																H	10	150	98	-	0	0	17I150M125I	RM2|S1|R35391567/1	scaffold00003_27#0
																H	10	150	98	-	0	0	18I150M124I	RM2|S1|R32684677/2	scaffold00003_27#0
																H	10	150	98	-	0	0	191I101M49D	RM2|S1|R34414901/1	scaffold00003_27#0
																H	10	150	98	-	0	0	26I150M116I	RM2|S1|R46187705/2	scaffold00003_27#0
																H	10	150	98	-	0	0	29I150M113I	RM2|S1|R8818842/1	scaffold00003_27#0
																H	10	150	98	-	0	0	38I150M104I	RM2|S1|R354639/1	scaffold00003_27#0
																H	10	150	98	-	0	0	42I150M100I	RM2|S1|R42148889/1	scaffold00003_27#0
																H	10	150	98	-	0	0	44I150M98I	RM2|S1|R37063329/2	scaffold00003_27#0
																H	10	150	98	-	0	0	49I150M93I	RM2|S1|R42111034/1	scaffold00003_27#0
																H	10	150	98	-	0	0	49I150M93I	RM2|S1|R48673403/2	scaffold00003_27#0
																H	10	150	98	-	0	0	4I150M138I	RM2|S1|R31107458/1	scaffold00003_27#0
																H	10	150	98	-	0	0	51D99M193I	RM2|S1|R17500832/2	scaffold00003_27#0
																H	10	150	98	-	0	0	56I150M86I	RM2|S1|R10911450/2	scaffold00003_27#0
																H	10	150	98	-	0	0	60I150M82I	RM2|S1|R40773172/1	scaffold00003_27#0
																H	10	150	98	-	0	0	62I150M80I	RM2|S1|R13003572/2	scaffold00003_27#0
																H	10	150	98	-	0	0	62I150M80I	RM2|S1|R13088344/1	scaffold00003_27#0
																H	10	150	98	-	0	0	66I150M76I	RM2|S1|R20995990/1	scaffold00003_27#0
																H	10	150	98	-	0	0	67I150M75I	RM2|S1|R2228531/1	scaffold00003_27#0
																H	10	150	98	-	0	0	67I150M75I	RM2|S1|R23986669/2	scaffold00003_27#0
																H	10	150	98	-	0	0	71I150M71I	RM2|S1|R27825249/1	scaffold00003_27#0
																H	10	150	98	-	0	0	75I150M67I	RM2|S1|R6464022/1	scaffold00003_27#0
																H	10	150	98	-	0	0	75I150M67I	RM2|S1|R9506697/1	scaffold00003_27#0
																H	10	150	98	-	0	0	76I150M66I	RM2|S1|R10795921/1	scaffold00003_27#0
																H	10	150	98	-	0	0	78I150M64I	RM2|S1|R5492995/1	scaffold00003_27#0
																H	10	150	98	-	0	0	80I150M62I	RM2|S1|R31060948/1	scaffold00003_27#0
																H	10	150	98	-	0	0	8I150M134I	RM2|S1|R1126079/1	scaffold00003_27#0
																H	10	150	98	-	0	0	90I150M52I	RM2|S1|R345822/1	scaffold00003_27#0
																H	10	150	98	-	0	0	94I150M48I	RM2|S1|R4159576/1	scaffold00003_27#0
																H	10	150	98	-	0	0	I150M141I	RM2|S1|R19196261/1	scaffold00003_27#0
																H	10	150	98.1	-	0	0	184I108M42D	RM2|S1|R26042190/1	scaffold00003_27#0
																H	10	150	98.1	-	0	0	184I108M42D	RM2|S1|R33506531/1	scaffold00003_27#0
																H	10	150	98.1	-	0	0	186I106M44D	RM2|S1|R3451897/2	scaffold00003_27#0
																H	10	150	98.1	-	0	0	45D105M187I	RM2|S1|R28164681/1	scaffold00003_27#0
																H	10	150	98.1	-	0	0	47D103M189I	RM2|S1|R37556515/2	scaffold00003_27#0
																H	10	150	98.2	+	0	0	179I113M37D	RM2|S1|R5444211/1	scaffold00003_27#0
																H	10	150	98.2	+	0	0	180I112M38D	RM2|S1|R13967041/2	scaffold00003_27#0
																H	10	150	98.2	+	0	0	182I110M40D	RM2|S1|R45730561/1	scaffold00003_27#0
																H	10	150	98.2	+	0	0	37D113M179I	RM2|S1|R46496835/1	scaffold00003_27#0
																H	10	150	98.2	+	0	0	41D109M183I	RM2|S1|R36637610/2	scaffold00003_27#0
																H	10	150	98.3	+	0	0	176I116M34D	RM2|S1|R22405096/1	scaffold00003_27#0
																H	10	150	98.3	+	0	0	176I116M34D	RM2|S1|R46213567/1	scaffold00003_27#0
																H	10	150	98.3	+	0	0	176I116M34D	RM2|S2|R27377496/1	scaffold00003_27#0
																H	10	150	98.3	+	0	0	31D119M173I	RM2|S1|R21716195/1	scaffold00003_27#0
																H	10	150	98.3	-	0	0	172I120M30D	RM2|S1|R43973645/1	scaffold00003_27#0
																H	10	150	98.3	-	0	0	173I119M31D	RM2|S1|R17476466/1	scaffold00003_27#0
																H	10	150	98.3	-	0	0	175I117M33D	RM2|S1|R2555432/1	scaffold00003_27#0
																H	10	150	98.3	-	0	0	29D121M171I	RM2|S1|R27442355/2	scaffold00003_27#0
																H	10	150	98.3	-	0	0	29D121M171I	RM2|S2|R41308665/2	scaffold00003_27#0
																H	10	150	98.4	+	0	0	165I127M23D	RM2|S1|R2092728/2	scaffold00003_27#0
																H	10	150	98.4	+	0	0	25D125M167I	RM2|S1|R49120853/1	scaffold00003_27#0
																H	10	150	98.4	-	0	0	163I129M21D	RM2|S1|R3487097/1	scaffold00003_27#0
																H	10	150	98.4	-	0	0	168I124M26D	RM2|S1|R8573349/2	scaffold00003_27#0
																H	10	150	98.4	-	0	0	27D123M169I	RM2|S1|R3927513/1	scaffold00003_27#0
																H	10	150	98.5	+	0	0	14D136M156I	RM2|S1|R26884937/1	scaffold00003_27#0
																H	10	150	98.5	+	0	0	156I136M14D	RM2|S1|R10536237/1	scaffold00003_27#0
																H	10	150	98.5	+	0	0	159I133M17D	RM2|S1|R3930696/2	scaffold00003_27#0
																H	10	150	98.5	+	0	0	160I132M18D	RM2|S1|R48596203/1	scaffold00003_27#0
																H	10	150	98.5	+	0	0	161I131M19D	RM2|S1|R23928056/1	scaffold00003_27#0
																H	10	150	98.5	+	0	0	19D131M161I	RM2|S1|R20876979/1	scaffold00003_27#0
																H	10	150	98.5	-	0	0	155I137M13D	RM2|S1|R41366769/1	scaffold00003_27#0
																H	10	150	98.5	-	0	0	159I133M17D	RM2|S1|R38482314/1	scaffold00003_27#0
																H	10	150	98.5	-	0	0	18D132M160I	RM2|S1|R36447372/1	scaffold00003_27#0
																H	10	150	98.6	+	0	0	146I146M4D	RM2|S1|R37772578/2	scaffold00003_27#0
																H	10	150	98.6	+	0	0	3D147M145I	RM2|S1|R27979783/1	scaffold00003_27#0
																H	10	150	98.6	+	0	0	5D145M147I	RM2|S1|R27137241/1	scaffold00003_27#0
																H	10	150	98.6	-	0	0	11D139M153I	RM2|S1|R45129778/1	scaffold00003_27#0
																H	10	150	98.6	-	0	0	152I140M10D	RM2|S1|R1322889/1	scaffold00003_27#0
																H	10	150	98.6	-	0	0	154I138M12D	RM2|S1|R24837768/1	scaffold00003_27#0
																H	10	150	98.6	-	0	0	2D148M144I	RM2|S1|R18722641/1	scaffold00003_27#0
																H	10	150	98.6	-	0	0	5D145M147I	RM2|S1|R12126818/2	scaffold00003_27#0
																H	10	150	98.6	-	0	0	7D143M149I	RM2|S1|R4990806/2	scaffold00003_27#0
																H	10	150	98.6	-	0	0	8D142M150I	RM2|S1|R18929628/2	scaffold00003_27#0
																H	10	150	98.7	+	0	0	100I150M42I	RM2|S1|R698023/1	scaffold00003_27#0
																H	10	150	98.7	+	0	0	104I150M38I	RM2|S1|R28025030/1	scaffold00003_27#0
																H	10	150	98.7	+	0	0	115I150M27I	RM2|S1|R8041435/1	scaffold00003_27#0
																H	10	150	98.7	+	0	0	118I150M24I	RM2|S1|R21829815/2	scaffold00003_27#0
																H	10	150	98.7	+	0	0	119I150M23I	RM2|S1|R31054471/1	scaffold00003_27#0
																H	10	150	98.7	+	0	0	119I150M23I	RM2|S1|R31197386/1	scaffold00003_27#0
																H	10	150	98.7	+	0	0	121I150M21I	RM2|S1|R37403241/1	scaffold00003_27#0
																H	10	150	98.7	+	0	0	123I150M19I	RM2|S1|R33009190/1	scaffold00003_27#0
																H	10	150	98.7	+	0	0	130I150M12I	RM2|S1|R48946347/2	scaffold00003_27#0
																H	10	150	98.7	+	0	0	130I150M12I	RM2|S1|R8332218/2	scaffold00003_27#0
																H	10	150	98.7	+	0	0	132I150M10I	RM2|S1|R27692244/2	scaffold00003_27#0
																H	10	150	98.7	+	0	0	135I150M7I	RM2|S1|R46762679/2	scaffold00003_27#0
																H	10	150	98.7	+	0	0	136I150M6I	RM2|S1|R21077334/1	scaffold00003_27#0
																H	10	150	98.7	+	0	0	137I150M5I	RM2|S2|R48220135/1	scaffold00003_27#0
																H	10	150	98.7	+	0	0	141I150MI	RM2|S1|R46175279/2	scaffold00003_27#0
																H	10	150	98.7	+	0	0	216I76M74D	RM2|S1|R42487392/2	scaffold00003_27#0
																H	10	150	98.7	+	0	0	28I150M114I	RM2|S1|R35841105/1	scaffold00003_27#0
																H	10	150	98.7	+	0	0	38I150M104I	RM2|S1|R21706958/2	scaffold00003_27#0
																H	10	150	98.7	+	0	0	45I150M97I	RM2|S1|R16028187/1	scaffold00003_27#0
																H	10	150	98.7	+	0	0	47I150M95I	RM2|S1|R27223920/1	scaffold00003_27#0
																H	10	150	98.7	+	0	0	54I150M88I	RM2|S1|R38482314/2	scaffold00003_27#0
																H	10	150	98.7	+	0	0	54I150M88I	RM2|S1|R8573349/1	scaffold00003_27#0
																H	10	150	98.7	+	0	0	56I150M86I	RM2|S1|R1519119/1	scaffold00003_27#0
																H	10	150	98.7	+	0	0	56I150M86I	RM2|S1|R37353432/2	scaffold00003_27#0
																H	10	150	98.7	+	0	0	56I150M86I	RM2|S2|R31858043/1	scaffold00003_27#0
																H	10	150	98.7	+	0	0	60I150M82I	RM2|S1|R4777905/1	scaffold00003_27#0
																H	10	150	98.7	+	0	0	65I150M77I	RM2|S1|R36143955/1	scaffold00003_27#0
																H	10	150	98.7	+	0	0	68I150M74I	RM2|S1|R19087207/1	scaffold00003_27#0
																H	10	150	98.7	+	0	0	72D78M214I	RM2|S1|R20995990/2	scaffold00003_27#0
																H	10	150	98.7	+	0	0	72I150M70I	RM2|S1|R48685602/1	scaffold00003_27#0
																H	10	150	98.7	+	0	0	74I150M68I	RM2|S1|R37353306/1	scaffold00003_27#0
																H	10	150	98.7	+	0	0	89I150M53I	RM2|S1|R47239788/1	scaffold00003_27#0
																H	10	150	98.7	+	0	0	92I150M50I	RM2|S1|R27495084/2	scaffold00003_27#0
																H	10	150	98.7	+	0	0	93I150M49I	RM2|S1|R19889927/2	scaffold00003_27#0
																H	10	150	98.7	+	0	0	95I150M47I	RM2|S1|R39888125/1	scaffold00003_27#0
																H	10	150	98.7	+	0	0	98I150M44I	RM2|S1|R14711336/1	scaffold00003_27#0
																H	10	150	98.7	+	0	0	98I150M44I	RM2|S1|R25080282/1	scaffold00003_27#0
																H	10	150	98.7	+	0	0	98I150M44I	RM2|S1|R45548783/1	scaffold00003_27#0
																H	10	150	98.7	+	0	0	9I150M133I	RM2|S1|R45892973/1	scaffold00003_27#0
																H	10	150	98.7	+	0	0	9I150M133I	RM2|S1|R46313062/1	scaffold00003_27#0
																H	10	150	98.7	-	0	0	102I150M40I	RM2|S1|R14803474/1	scaffold00003_27#0
																H	10	150	98.7	-	0	0	104I150M38I	RM2|S1|R36354682/1	scaffold00003_27#0
																H	10	150	98.7	-	0	0	10I150M132I	RM2|S1|R26640749/2	scaffold00003_27#0
																H	10	150	98.7	-	0	0	110I150M32I	RM2|S1|R7863244/1	scaffold00003_27#0
																H	10	150	98.7	-	0	0	118I150M24I	RM2|S1|R10543778/1	scaffold00003_27#0
																H	10	150	98.7	-	0	0	121I150M21I	RM2|S1|R16233234/1	scaffold00003_27#0
																H	10	150	98.7	-	0	0	127I150M15I	RM2|S1|R12720447/1	scaffold00003_27#0
																H	10	150	98.7	-	0	0	127I150M15I	RM2|S2|R7683194/2	scaffold00003_27#0
																H	10	150	98.7	-	0	0	136I150M6I	RM2|S1|R44192680/2	scaffold00003_27#0
																H	10	150	98.7	-	0	0	137I150M5I	RM2|S1|R18718397/1	scaffold00003_27#0
																H	10	150	98.7	-	0	0	141I150MI	RM2|S1|R43581890/2	scaffold00003_27#0
																H	10	150	98.7	-	0	0	14I150M128I	RM2|S1|R17767916/1	scaffold00003_27#0
																H	10	150	98.7	-	0	0	14I150M128I	RM2|S1|R24721029/1	scaffold00003_27#0
																H	10	150	98.7	-	0	0	14I150M128I	RM2|S1|R38426931/1	scaffold00003_27#0
																H	10	150	98.7	-	0	0	214I78M72D	RM2|S1|R39247367/1	scaffold00003_27#0
																H	10	150	98.7	-	0	0	215I77M73D	RM2|S1|R12820007/2	scaffold00003_27#0
																H	10	150	98.7	-	0	0	217I75M75D	RM2|S1|R8041435/2	scaffold00003_27#0
																H	10	150	98.7	-	0	0	26I150M116I	RM2|S1|R27141725/2	scaffold00003_27#0
																H	10	150	98.7	-	0	0	28I150M114I	RM2|S1|R16485409/2	scaffold00003_27#0
																H	10	150	98.7	-	0	0	30I150M112I	RM2|S1|R42455643/1	scaffold00003_27#0
																H	10	150	98.7	-	0	0	38I150M104I	RM2|S1|R27073764/2	scaffold00003_27#0
																H	10	150	98.7	-	0	0	39I150M103I	RM2|S1|R10956123/2	scaffold00003_27#0
																H	10	150	98.7	-	0	0	48I150M94I	RM2|S1|R22228233/1	scaffold00003_27#0
																H	10	150	98.7	-	0	0	48I150M94I	RM2|S1|R39731118/2	scaffold00003_27#0
																H	10	150	98.7	-	0	0	51I150M91I	RM2|S1|R22286214/1	scaffold00003_27#0
																H	10	150	98.7	-	0	0	52I150M90I	RM2|S1|R7678443/1	scaffold00003_27#0
																H	10	150	98.7	-	0	0	61I150M81I	RM2|S1|R10307388/2	scaffold00003_27#0
																H	10	150	98.7	-	0	0	64I150M78I	RM2|S1|R24670081/1	scaffold00003_27#0
																H	10	150	98.7	-	0	0	64I150M78I	RM2|S1|R33324492/1	scaffold00003_27#0
																H	10	150	98.7	-	0	0	67I150M75I	RM2|S1|R30012506/1	scaffold00003_27#0
																H	10	150	98.7	-	0	0	68I150M74I	RM2|S1|R41909039/1	scaffold00003_27#0
																H	10	150	98.7	-	0	0	69I150M73I	RM2|S1|R34274778/1	scaffold00003_27#0
																H	10	150	98.7	-	0	0	73D77M215I	RM2|S1|R35597319/1	scaffold00003_27#0
																H	10	150	98.7	-	0	0	73I150M69I	RM2|S1|R33433173/1	scaffold00003_27#0
																H	10	150	98.7	-	0	0	79I150M63I	RM2|S2|R14871025/1	scaffold00003_27#0
																H	10	150	98.7	-	0	0	82I150M60I	RM2|S1|R12735517/1	scaffold00003_27#0
																H	10	150	98.7	-	0	0	97I150M45I	RM2|S1|R11318543/1	scaffold00003_27#0
																H	10	150	98.7	-	0	0	97I150M45I	RM2|S1|R19038014/2	scaffold00003_27#0
																H	10	150	98.8	+	0	0	208I84M66D	RM2|S1|R5475247/1	scaffold00003_27#0
																H	10	150	98.8	+	0	0	209I83M67D	RM2|S1|R36979412/2	scaffold00003_27#0
																H	10	150	98.8	+	0	0	211I81M69D	RM2|S1|R14687680/2	scaffold00003_27#0
																H	10	150	98.8	+	0	0	211I81M69D	RM2|S1|R37853824/1	scaffold00003_27#0
																H	10	150	98.8	+	0	0	211I81M69D	RM2|S1|R8745719/1	scaffold00003_27#0
																H	10	150	98.8	+	0	0	65D85M207I	RM2|S1|R3354579/1	scaffold00003_27#0
																H	10	150	98.8	+	0	0	65D85M207I	RM2|S1|R45534942/1	scaffold00003_27#0
																H	10	150	98.8	+	0	0	66D84M208I	RM2|S1|R10911450/1	scaffold00003_27#0
																H	10	150	98.8	+	0	0	68D82M210I	RM2|S1|R5375238/1	scaffold00003_27#0
																H	10	150	98.8	+	0	0	69D81M211I	RM2|S1|R32163077/2	scaffold00003_27#0
																H	10	150	98.8	-	0	0	208I84M66D	RM2|S1|R7094830/2	scaffold00003_27#0
																H	10	150	98.8	-	0	0	209I83M67D	RM2|S1|R44332228/2	scaffold00003_27#0
																H	10	150	98.8	-	0	0	211I81M69D	RM2|S1|R32211290/1	scaffold00003_27#0
																H	10	150	98.8	-	0	0	211I81M69D	RM2|S1|R36993765/2	scaffold00003_27#0
																H	10	150	98.8	-	0	0	212I80M70D	RM2|S1|R1985854/2	scaffold00003_27#0
																H	10	150	98.8	-	0	0	65D85M207I	RM2|S1|R614007/2	scaffold00003_27#0
																H	10	150	98.8	-	0	0	68D82M210I	RM2|S1|R18697878/2	scaffold00003_27#0
																H	10	150	98.9	+	0	0	197I95M55D	RM2|S1|R16596466/1	scaffold00003_27#0
																H	10	150	98.9	+	0	0	199I93M57D	RM2|S1|R39205296/2	scaffold00003_27#0
																H	10	150	98.9	+	0	0	202I90M60D	RM2|S1|R30505351/2	scaffold00003_27#0
																H	10	150	98.9	+	0	0	204I88M62D	RM2|S1|R17173444/2	scaffold00003_27#0
																H	10	150	98.9	+	0	0	204I88M62D	RM2|S1|R43907018/1	scaffold00003_27#0
																H	10	150	98.9	+	0	0	56D94M198I	RM2|S1|R1246680/1	scaffold00003_27#0
																H	10	150	98.9	+	0	0	59D91M201I	RM2|S1|R11318543/2	scaffold00003_27#0
																H	10	150	98.9	+	0	0	63D87M205I	RM2|S1|R6489857/1	scaffold00003_27#0
																H	10	150	98.9	+	0	0	63D87M205I	RM2|S1|R7371790/1	scaffold00003_27#0
																H	10	150	98.9	-	0	0	197I95M55D	RM2|S1|R47657629/1	scaffold00003_27#0
																H	10	150	98.9	-	0	0	198I94M56D	RM2|S1|R15730001/1	scaffold00003_27#0
																H	10	150	98.9	-	0	0	199I93M57D	RM2|S1|R25653249/1	scaffold00003_27#0
																H	10	150	98.9	-	0	0	61D89M203I	RM2|S1|R19640121/2	scaffold00003_27#0
																H	10	150	99	+	0	0	187I105M45D	RM2|S1|R1154589/1	scaffold00003_27#0
																H	10	150	99	+	0	0	188I104M46D	RM2|S1|R27975603/2	scaffold00003_27#0
																H	10	150	99	+	0	0	188I104M46D	RM2|S1|R38069197/1	scaffold00003_27#0
																H	10	150	99	+	0	0	189I103M47D	RM2|S1|R5599581/1	scaffold00003_27#0
																H	10	150	99	+	0	0	195I97M53D	RM2|S1|R3191207/1	scaffold00003_27#0
																H	10	150	99	+	0	0	196I96M54D	RM2|S1|R47192749/2	scaffold00003_27#0
																H	10	150	99	-	0	0	192I100M50D	RM2|S1|R31194251/1	scaffold00003_27#0
																H	10	150	99	-	0	0	195I97M53D	RM2|S1|R21566188/1	scaffold00003_27#0
																H	10	150	99	-	0	0	196I96M54D	RM2|S1|R39910812/1	scaffold00003_27#0
																H	10	150	99	-	0	0	49D101M191I	RM2|S1|R45934166/2	scaffold00003_27#0
																H	10	150	99	-	0	0	53D97M195I	RM2|S1|R22266549/2	scaffold00003_27#0
																H	10	150	99.1	+	0	0	175I117M33D	RM2|S1|R25368997/1	scaffold00003_27#0
																H	10	150	99.1	+	0	0	181I111M39D	RM2|S1|R14245506/1	scaffold00003_27#0
																H	10	150	99.1	+	0	0	185I107M43D	RM2|S1|R49683890/2	scaffold00003_27#0
																H	10	150	99.1	+	0	0	35D115M177I	RM2|S1|R13003572/1	scaffold00003_27#0
																H	10	150	99.1	+	0	0	36D114M178I	RM2|S1|R41073823/1	scaffold00003_27#0
																H	10	150	99.1	+	0	0	39D111M181I	RM2|S1|R19687288/1	scaffold00003_27#0
																H	10	150	99.1	-	0	0	175I117M33D	RM2|S1|R46753610/1	scaffold00003_27#0
																H	10	150	99.1	-	0	0	178I114M36D	RM2|S1|R39888125/2	scaffold00003_27#0
																H	10	150	99.1	-	0	0	39D111M181I	RM2|S1|R5540568/2	scaffold00003_27#0
																H	10	150	99.1	-	0	0	40D110M182I	RM2|S1|R46264331/1	scaffold00003_27#0
																H	10	150	99.1	-	0	0	40D110M182I	RM2|S1|R47863549/1	scaffold00003_27#0
																H	10	150	99.1	-	0	0	43D107M185I	RM2|S1|R1264716/1	scaffold00003_27#0
																H	10	150	99.2	+	0	0	170I122M28D	RM2|S1|R265326/1	scaffold00003_27#0
																H	10	150	99.2	+	0	0	19D131M161I	RM2|S1|R6011411/2	scaffold00003_27#0
																H	10	150	99.2	+	0	0	26D124M168I	RM2|S1|R154196/1	scaffold00003_27#0
																H	10	150	99.2	+	0	0	26D124M168I	RM2|S1|R5120285/1	scaffold00003_27#0
																H	10	150	99.2	+	0	0	31D119M173I	RM2|S1|R19117702/1	scaffold00003_27#0
																H	10	150	99.2	-	0	0	170I122M28D	RM2|S1|R41705676/1	scaffold00003_27#0
																H	10	150	99.2	-	0	0	173I119M31D	RM2|S1|R49815111/1	scaffold00003_27#0
																H	10	150	99.2	-	0	0	174I118M32D	RM2|S1|R21382442/1	scaffold00003_27#0
																H	10	150	99.2	-	0	0	17D133M159I	RM2|S1|R18835497/1	scaffold00003_27#0
																H	10	150	99.2	-	0	0	32D118M174I	RM2|S1|R29599633/2	scaffold00003_27#0
																H	10	150	99.3	+	0	0	106I150M36I	RM2|S1|R35811485/1	scaffold00003_27#0
																H	10	150	99.3	+	0	0	110I150M32I	RM2|S1|R11718262/1	scaffold00003_27#0
																H	10	150	99.3	+	0	0	112I150M30I	RM2|S1|R3662459/2	scaffold00003_27#0
																H	10	150	99.3	+	0	0	124I150M18I	RM2|S1|R21425459/1	scaffold00003_27#0
																H	10	150	99.3	+	0	0	124I150M18I	RM2|S1|R29996592/1	scaffold00003_27#0
																H	10	150	99.3	+	0	0	131I150M11I	RM2|S1|R43676249/1	scaffold00003_27#0
																H	10	150	99.3	+	0	0	141I150MI	RM2|S1|R6646178/2	scaffold00003_27#0
																H	10	150	99.3	+	0	0	142I150M	RM2|S1|R16741446/1	scaffold00003_27#0
																H	10	150	99.3	+	0	0	150I142M8D	RM2|S1|R12608429/1	scaffold00003_27#0
																H	10	150	99.3	+	0	0	155I137M13D	RM2|S1|R39630731/1	scaffold00003_27#0
																H	10	150	99.3	+	0	0	157I135M15D	RM2|S1|R12820007/1	scaffold00003_27#0
																H	10	150	99.3	+	0	0	24I150M118I	RM2|S2|R7683194/1	scaffold00003_27#0
																H	10	150	99.3	+	0	0	28I150M114I	RM2|S1|R26127652/1	scaffold00003_27#0
																H	10	150	99.3	+	0	0	46I150M96I	RM2|S1|R34414901/2	scaffold00003_27#0
																H	10	150	99.3	+	0	0	50I150M92I	RM2|S1|R7998472/2	scaffold00003_27#0
																H	10	150	99.3	+	0	0	51I150M91I	RM2|S1|R49817610/1	scaffold00003_27#0
																H	10	150	99.3	+	0	0	63I150M79I	RM2|S2|R49505122/1	scaffold00003_27#0
																H	10	150	99.3	+	0	0	71I150M71I	RM2|S1|R47673024/1	scaffold00003_27#0
																H	10	150	99.3	+	0	0	78I150M64I	RM2|S1|R27010656/2	scaffold00003_27#0
																H	10	150	99.3	+	0	0	86I150M56I	RM2|S1|R12982422/1	scaffold00003_27#0
																H	10	150	99.3	+	0	0	91I150M51I	RM2|S1|R22219227/1	scaffold00003_27#0
																H	10	150	99.3	+	0	0	99I150M43I	RM2|S1|R22921219/1	scaffold00003_27#0
																H	10	150	99.3	-	0	0	10D140M152I	RM2|S1|R16604432/1	scaffold00003_27#0
																H	10	150	99.3	-	0	0	111I150M31I	RM2|S1|R12049686/1	scaffold00003_27#0
																H	10	150	99.3	-	0	0	111I150M31I	RM2|S1|R13930780/1	scaffold00003_27#0
																H	10	150	99.3	-	0	0	112I150M30I	RM2|S1|R45310184/1	scaffold00003_27#0
																H	10	150	99.3	-	0	0	115I150M27I	RM2|S1|R18918027/1	scaffold00003_27#0
																H	10	150	99.3	-	0	0	118I150M24I	RM2|S1|R5522991/1	scaffold00003_27#0
																H	10	150	99.3	-	0	0	118I150M24I	RM2|S1|R6011411/1	scaffold00003_27#0
																H	10	150	99.3	-	0	0	119I150M23I	RM2|S1|R9207907/1	scaffold00003_27#0
																H	10	150	99.3	-	0	0	123I150M19I	RM2|S1|R18463885/1	scaffold00003_27#0
																H	10	150	99.3	-	0	0	131I150M11I	RM2|S1|R18672281/1	scaffold00003_27#0
																H	10	150	99.3	-	0	0	138I150M4I	RM2|S1|R49817610/2	scaffold00003_27#0
																H	10	150	99.3	-	0	0	14D136M156I	RM2|S1|R26378157/1	scaffold00003_27#0
																H	10	150	99.3	-	0	0	152I140M10D	RM2|S1|R9549720/1	scaffold00003_27#0
																H	10	150	99.3	-	0	0	157I135M15D	RM2|S1|R19889927/1	scaffold00003_27#0
																H	10	150	99.3	-	0	0	158I134M16D	RM2|S1|R37432821/1	scaffold00003_27#0
																H	10	150	99.3	-	0	0	158I134M16D	RM2|S1|R44179780/1	scaffold00003_27#0
																H	10	150	99.3	-	0	0	23I150M119I	RM2|S1|R10682611/1	scaffold00003_27#0
																H	10	150	99.3	-	0	0	23I150M119I	RM2|S1|R2823035/1	scaffold00003_27#0
																H	10	150	99.3	-	0	0	26I150M116I	RM2|S1|R6624146/1	scaffold00003_27#0
																H	10	150	99.3	-	0	0	31I150M111I	RM2|S1|R7619019/1	scaffold00003_27#0
																H	10	150	99.3	-	0	0	36I150M106I	RM2|S1|R46770496/1	scaffold00003_27#0
																H	10	150	99.3	-	0	0	43I150M99I	RM2|S1|R31435687/1	scaffold00003_27#0
																H	10	150	99.3	-	0	0	4D146M146I	RM2|S1|R14495347/1	scaffold00003_27#0
																H	10	150	99.3	-	0	0	53I150M89I	RM2|S1|R29995153/1	scaffold00003_27#0
																H	10	150	99.3	-	0	0	56I150M86I	RM2|S1|R32163077/1	scaffold00003_27#0
																H	10	150	99.3	-	0	0	57I150M85I	RM2|S1|R18220911/1	scaffold00003_27#0
																H	10	150	99.3	-	0	0	5I150M137I	RM2|S1|R25662713/2	scaffold00003_27#0
																H	10	150	99.3	-	0	0	65I150M77I	RM2|S1|R34433952/1	scaffold00003_27#0
																H	10	150	99.3	-	0	0	67I150M75I	RM2|S1|R23741997/1	scaffold00003_27#0
																H	10	150	99.3	-	0	0	6D144M148I	RM2|S1|R12604803/1	scaffold00003_27#0
																H	10	150	99.3	-	0	0	76I150M66I	RM2|S1|R19967160/1	scaffold00003_27#0
																H	10	150	99.3	-	0	0	8D142M150I	RM2|S1|R26118060/1	scaffold00003_27#0
																H	10	150	99.3	-	0	0	96I150M46I	RM2|S1|R14672111/1	scaffold00003_27#0
																H	10	150	99.3	-	0	0	96I150M46I	RM2|S1|R37974577/1	scaffold00003_27#0
																H	103	150	100	+	0	0	195I97M53D	RM2|S2|R20867944/2	scaffold1.1_28#0
																H	103	150	100	-	0	0	179I113M37D	RM2|S2|R46255232/2	scaffold1.1_28#0
																H	103	150	100	-	0	0	52D98M194I	RM2|S1|R5495535/1	scaffold1.1_28#0
																H	103	150	100	-	0	0	60D90M202I	RM2|S2|R21085204/2	scaffold1.1_28#0
																H	103	150	100	-	0	0	68D82M210I	RM2|S2|R47130467/1	scaffold1.1_28#0
																H	103	150	97.2	+	0	0	43D107M185I	RM2|S2|R18811694/2	scaffold1.1_28#0
																H	103	150	97.3	+	0	0	30I150M112I	RM2|S2|R46255232/1	scaffold1.1_28#0
																H	103	150	97.3	+	0	0	53I150M89I	RM2|S2|R13834161/1	scaffold1.1_28#0
																H	103	150	97.3	+	0	0	54I150M88I	RM2|S2|R32110932/1	scaffold1.1_28#0
																H	103	150	97.3	+	0	0	78I150M64I	RM2|S2|R14236521/1	scaffold1.1_28#0
																H	103	150	97.3	+	0	0	89I150M53I	RM2|S2|R34693387/1	scaffold1.1_28#0
																H	103	150	97.3	-	0	0	134I150M8I	RM2|S2|R15208786/1	scaffold1.1_28#0
																H	103	150	97.3	-	0	0	41I150M101I	RM2|S2|R31004695/2	scaffold1.1_28#0
																H	103	150	97.5	+	0	0	32D118M174I	RM2|S2|R42814148/1	scaffold1.1_28#0
																H	103	150	97.8	+	0	0	13D137M155I	RM2|S2|R13493229/2	scaffold1.1_28#0
																H	103	150	97.8	-	0	0	15D135M157I	RM2|S2|R5633571/2	scaffold1.1_28#0
																H	103	150	97.9	-	0	0	146I146M4D	RM2|S2|R35042907/1	scaffold1.1_28#0
																H	103	150	98	+	0	0	126I150M16I	RM2|S2|R14029846/2	scaffold1.1_28#0
																H	103	150	98	+	0	0	136I150M6I	RM2|S2|R23924413/2	scaffold1.1_28#0
																H	103	150	98	+	0	0	20I150M122I	RM2|S2|R35042907/2	scaffold1.1_28#0
																H	103	150	98	-	0	0	56I150M86I	RM2|S2|R37637058/1	scaffold1.1_28#0
																H	103	150	98	-	0	0	78I150M64I	RM2|S2|R28213853/2	scaffold1.1_28#0
																H	103	150	98.3	-	0	0	32D118M174I	RM2|S2|R31386566/2	scaffold1.1_28#0
																H	103	150	98.6	+	0	0	148I144M6D	RM2|S2|R10503155/1	scaffold1.1_28#0
																H	103	150	98.7	+	0	0	49I150M93I	RM2|S2|R23180678/1	scaffold1.1_28#0
																H	103	150	98.7	+	0	0	73I150M69I	RM2|S2|R30918357/1	scaffold1.1_28#0
																H	103	150	98.7	+	0	0	86I150M56I	RM2|S2|R32127928/1	scaffold1.1_28#0
																H	103	150	98.7	-	0	0	41I150M101I	RM2|S2|R21920919/1	scaffold1.1_28#0
																H	103	150	98.7	-	0	0	46I150M96I	RM2|S2|R18811694/1	scaffold1.1_28#0
																H	103	150	98.8	+	0	0	65D85M207I	RM2|S2|R31004695/1	scaffold1.1_28#0
																H	103	150	98.8	-	0	0	68D82M210I	RM2|S2|R36880570/1	scaffold1.1_28#0
																H	103	150	98.9	-	0	0	60D90M202I	RM2|S2|R36468737/2	scaffold1.1_28#0
																H	103	150	99.1	-	0	0	44D106M186I	RM2|S2|R46121479/2	scaffold1.1_28#0
																H	103	150	99.2	+	0	0	170I122M28D	RM2|S2|R12911609/2	scaffold1.1_28#0
																H	103	150	99.3	+	0	0	128I150M14I	RM2|S2|R20379756/1	scaffold1.1_28#0
																H	103	150	99.3	+	0	0	85I150M57I	RM2|S2|R14379658/2	scaffold1.1_28#0
																H	103	150	99.3	-	0	0	128I150M14I	RM2|S2|R798090/1	scaffold1.1_28#0
																H	103	150	99.3	-	0	0	81I150M61I	RM2|S2|R13493229/1	scaffold1.1_28#0
																H	104	150	100	+	0	0	111I150M31I	RM2|S2|R42512360/1	scaffold2.1_25#0
																H	104	150	100	+	0	0	130I150M12I	RM2|S2|R10393932/1	scaffold2.1_25#0
																H	104	150	100	+	0	0	215I77M73D	RM2|S2|R28650519/1	scaffold2.1_25#0
																H	104	150	100	+	0	0	217I75M75D	RM2|S2|R15184120/2	scaffold2.1_25#0
																H	104	150	100	+	0	0	34D116M176I	RM2|S2|R45458604/1	scaffold2.1_25#0
																H	104	150	100	+	0	0	54D96M196I	RM2|S2|R21477867/1	scaffold2.1_25#0
																H	104	150	100	+	0	0	56D94M198I	RM2|S2|R1536200/1	scaffold2.1_25#0
																H	104	150	100	-	0	0	26I150M116I	RM2|S2|R49882970/1	scaffold2.1_25#0
																H	104	150	100	-	0	0	60D90M202I	RM2|S2|R23783445/2	scaffold2.1_25#0
																H	104	150	100	-	0	0	60I150M82I	RM2|S2|R20696621/1	scaffold2.1_25#0
																H	104	150	97.1	+	0	0	12D138M154I	RM2|S2|R28250669/2	scaffold2.1_25#0
																H	104	150	97.1	+	0	0	156I136M14D	RM2|S2|R34268385/1	scaffold2.1_25#0
																H	104	150	97.2	+	0	0	147I145M5D	RM2|S2|R29788707/2	scaffold2.1_25#0
																H	104	150	97.3	+	0	0	109I150M33I	RM2|S2|R6319588/1	scaffold2.1_25#0
																H	104	150	97.3	+	0	0	34I150M108I	RM2|S2|R21095657/2	scaffold2.1_25#0
																H	104	150	97.3	+	0	0	56I150M86I	RM2|S2|R16949089/2	scaffold2.1_25#0
																H	104	150	97.3	+	0	0	88I150M54I	RM2|S2|R1543256/2	scaffold2.1_25#0
																H	104	150	97.3	-	0	0	18I150M124I	RM2|S2|R1536200/2	scaffold2.1_25#0
																H	104	150	97.3	-	0	0	68I150M74I	RM2|S2|R38176274/2	scaffold2.1_25#0
																H	104	150	97.3	-	0	0	91I150M51I	RM2|S2|R5781041/2	scaffold2.1_25#0
																H	104	150	97.4	+	0	0	34D116M176I	RM2|S2|R33724352/1	scaffold2.1_25#0
																H	104	150	97.4	+	0	0	74D76M216I	RM2|S2|R49222045/1	scaffold2.1_25#0
																H	104	150	97.5	+	0	0	31D119M173I	RM2|S2|R38176274/1	scaffold2.1_25#0
																H	104	150	97.5	-	0	0	29D121M171I	RM2|S2|R45315638/2	scaffold2.1_25#0
																H	104	150	97.6	+	0	0	208I84M66D	RM2|S2|R6539516/2	scaffold2.1_25#0
																H	104	150	97.7	-	0	0	206I86M64D	RM2|S2|R27230793/2	scaffold2.1_25#0
																H	104	150	97.8	+	0	0	57D93M199I	RM2|S2|R44263353/2	scaffold2.1_25#0
																H	104	150	97.8	-	0	0	13D137M155I	RM2|S2|R33730709/1	scaffold2.1_25#0
																H	104	150	97.9	-	0	0	6D144M148I	RM2|S2|R40514177/2	scaffold2.1_25#0
																H	104	150	98	+	0	0	108I150M34I	RM2|S2|R30012245/2	scaffold2.1_25#0
																H	104	150	98	+	0	0	114I150M28I	RM2|S2|R12881891/2	scaffold2.1_25#0
																H	104	150	98	+	0	0	130I150M12I	RM2|S2|R24208988/2	scaffold2.1_25#0
																H	104	150	98	+	0	0	13I150M129I	RM2|S2|R3423360/2	scaffold2.1_25#0
																H	104	150	98	+	0	0	31I150M111I	RM2|S2|R32413551/2	scaffold2.1_25#0
																H	104	150	98	+	0	0	3I150M139I	RM2|S2|R20801649/2	scaffold2.1_25#0
																H	104	150	98	+	0	0	44I150M98I	RM2|S2|R34431961/1	scaffold2.1_25#0
																H	104	150	98	+	0	0	48D102M190I	RM2|S2|R30495988/1	scaffold2.1_25#0
																H	104	150	98	+	0	0	75I150M67I	RM2|S2|R4762947/2	scaffold2.1_25#0
																H	104	150	98	-	0	0	100I150M42I	RM2|S2|R46326989/2	scaffold2.1_25#0
																H	104	150	98	-	0	0	110I150M32I	RM2|S2|R15614099/1	scaffold2.1_25#0
																H	104	150	98	-	0	0	12I150M130I	RM2|S2|R38216290/2	scaffold2.1_25#0
																H	104	150	98	-	0	0	136I150M6I	RM2|S2|R28250669/1	scaffold2.1_25#0
																H	104	150	98	-	0	0	21I150M121I	RM2|S2|R8734273/1	scaffold2.1_25#0
																H	104	150	98	-	0	0	87I150M55I	RM2|S2|R44263353/1	scaffold2.1_25#0
																H	104	150	98	-	0	0	91I150M51I	RM2|S2|R30495988/2	scaffold2.1_25#0
																H	104	150	98.1	-	0	0	185I107M43D	RM2|S2|R4762947/1	scaffold2.1_25#0
																H	104	150	98.2	-	0	0	179I113M37D	RM2|S2|R45222806/1	scaffold2.1_25#0
																H	104	150	98.3	+	0	0	30D120M172I	RM2|S2|R46326989/1	scaffold2.1_25#0
																H	104	150	98.3	+	0	0	35D115M177I	RM2|S2|R29981140/1	scaffold2.1_25#0
																H	104	150	98.4	+	0	0	166I126M24D	RM2|S2|R27814620/1	scaffold2.1_25#0
																H	104	150	98.4	+	0	0	23D127M165I	RM2|S2|R7089489/1	scaffold2.1_25#0
																H	104	150	98.4	+	0	0	24D126M166I	RM2|S2|R22031030/2	scaffold2.1_25#0
																H	104	150	98.5	+	0	0	157I135M15D	RM2|S2|R9038303/2	scaffold2.1_25#0
																H	104	150	98.5	+	0	0	158I134M16D	RM2|S2|R49341517/1	scaffold2.1_25#0
																H	104	150	98.6	+	0	0	7D143M149I	RM2|S2|R7698169/1	scaffold2.1_25#0
																H	104	150	98.6	+	0	0	9D141M151I	RM2|S2|R5781041/1	scaffold2.1_25#0
																H	104	150	98.7	+	0	0	107I150M35I	RM2|S2|R3105248/2	scaffold2.1_25#0
																H	104	150	98.7	+	0	0	110I150M32I	RM2|S2|R46200084/2	scaffold2.1_25#0
																H	104	150	98.7	+	0	0	117I150M25I	RM2|S2|R11639510/2	scaffold2.1_25#0
																H	104	150	98.7	+	0	0	122I150M20I	RM2|S2|R40868023/1	scaffold2.1_25#0
																H	104	150	98.7	+	0	0	26I150M116I	RM2|S2|R29836259/1	scaffold2.1_25#0
																H	104	150	98.7	+	0	0	67I150M75I	RM2|S2|R39437941/2	scaffold2.1_25#0
																H	104	150	98.7	+	0	0	91I150M51I	RM2|S2|R4980560/1	scaffold2.1_25#0
																H	104	150	98.7	-	0	0	215I77M73D	RM2|S2|R12982095/1	scaffold2.1_25#0
																H	104	150	98.7	-	0	0	41I150M101I	RM2|S2|R18862638/1	scaffold2.1_25#0
																H	104	150	98.7	-	0	0	57I150M85I	RM2|S2|R39216491/1	scaffold2.1_25#0
																H	104	150	98.7	-	0	0	D149M143I	RM2|S2|R40063712/1	scaffold2.1_25#0
																H	104	150	98.9	+	0	0	199I93M57D	RM2|S2|R7614129/2	scaffold2.1_25#0
																H	104	150	98.9	-	0	0	199I93M57D	RM2|S2|R3105248/1	scaffold2.1_25#0
																H	104	150	99	+	0	0	191I101M49D	RM2|S2|R17335447/1	scaffold2.1_25#0
																H	104	150	99	-	0	0	188I104M46D	RM2|S2|R1543256/1	scaffold2.1_25#0
																H	104	150	99	-	0	0	191I101M49D	RM2|S2|R4980560/2	scaffold2.1_25#0
																H	104	150	99	-	0	0	45D105M187I	RM2|S2|R36329128/1	scaffold2.1_25#0
																H	104	150	99.1	+	0	0	175I117M33D	RM2|S2|R29440597/1	scaffold2.1_25#0
																H	104	150	99.1	+	0	0	185I107M43D	RM2|S2|R10400538/1	scaffold2.1_25#0
																H	104	150	99.1	-	0	0	176I116M34D	RM2|S2|R32413551/1	scaffold2.1_25#0
																H	104	150	99.1	-	0	0	177I115M35D	RM2|S2|R21095657/1	scaffold2.1_25#0
																H	104	150	99.2	-	0	0	163I129M21D	RM2|S2|R20801649/1	scaffold2.1_25#0
																H	104	150	99.3	+	0	0	32I150M110I	RM2|S2|R6377259/1	scaffold2.1_25#0
																H	104	150	99.3	+	0	0	83I150M59I	RM2|S2|R27230793/1	scaffold2.1_25#0
																H	104	150	99.3	+	0	0	85I150M57I	RM2|S2|R12255953/1	scaffold2.1_25#0
																H	104	150	99.3	+	0	0	92I150M50I	RM2|S2|R30025215/1	scaffold2.1_25#0
																H	104	150	99.3	-	0	0	109I150M33I	RM2|S2|R3423360/1	scaffold2.1_25#0
																H	104	150	99.3	-	0	0	123I150M19I	RM2|S2|R22031030/1	scaffold2.1_25#0
																H	104	150	99.3	-	0	0	123I150M19I	RM2|S2|R9295649/1	scaffold2.1_25#0
																H	104	150	99.3	-	0	0	147I145M5D	RM2|S2|R16949089/1	scaffold2.1_25#0
																H	104	150	99.3	-	0	0	39I150M103I	RM2|S2|R29181451/1	scaffold2.1_25#0
																H	104	150	99.3	-	0	0	89I150M53I	RM2|S2|R41061494/1	scaffold2.1_25#0
																H	106	150	100	+	0	0	37D113M179I	RM2|S1|R38492541/1	scaffold13.1_29#0
																H	106	150	100	+	0	0	62D88M204I	RM2|S1|R29783797/1	scaffold13.1_29#0
																H	106	150	100	+	0	0	66D84M208I	RM2|S1|R11237860/1	scaffold13.1_29#0
																H	106	150	97.2	-	0	0	8D142M150I	RM2|S1|R12010349/1	scaffold13.1_29#0
																H	106	150	97.3	+	0	0	19I150M123I	RM2|S1|R15599324/2	scaffold13.1_29#0
																H	106	150	97.3	+	0	0	51I150M91I	RM2|S1|R14960968/1	scaffold13.1_29#0
																H	106	150	97.3	+	0	0	5I150M137I	RM2|S1|R22592092/2	scaffold13.1_29#0
																H	106	150	97.9	+	0	0	9D141M151I	RM2|S1|R39655394/2	scaffold13.1_29#0
																H	106	150	98	+	0	0	118I150M24I	RM2|S1|R18632038/1	scaffold13.1_29#0
																H	106	150	98	+	0	0	45I150M97I	RM2|S1|R33720732/1	scaffold13.1_29#0
																H	106	150	98	+	0	0	56I150M86I	RM2|S1|R31189756/2	scaffold13.1_29#0
																H	106	150	98	+	0	0	83I150M59I	RM2|S1|R41368295/2	scaffold13.1_29#0
																H	106	150	98	+	0	0	85I150M57I	RM2|S1|R45413540/1	scaffold13.1_29#0
																H	106	150	98	-	0	0	107I150M35I	RM2|S1|R35187851/2	scaffold13.1_29#0
																H	106	150	98	-	0	0	10I150M132I	RM2|S1|R22143593/2	scaffold13.1_29#0
																H	106	150	98	-	0	0	42I150M100I	RM2|S1|R16433451/1	scaffold13.1_29#0
																H	106	150	98	-	0	0	7I150M135I	RM2|S1|R9322906/2	scaffold13.1_29#0
																H	106	150	98.7	+	0	0	68I150M74I	RM2|S1|R14351025/2	scaffold13.1_29#0
																H	106	150	98.7	+	0	0	92I150M50I	RM2|S1|R43154080/1	scaffold13.1_29#0
																H	106	150	98.7	-	0	0	124I150M18I	RM2|S1|R39655394/1	scaffold13.1_29#0
																H	106	150	98.7	-	0	0	92I150M50I	RM2|S1|R15599324/1	scaffold13.1_29#0
																H	106	150	99.1	+	0	0	36D114M178I	RM2|S1|R5657352/2	scaffold13.1_29#0
																H	106	150	99.2	-	0	0	31D119M173I	RM2|S1|R41347247/2	scaffold13.1_29#0
																H	106	150	99.3	+	0	0	82I150M60I	RM2|S1|R9726828/1	scaffold13.1_29#0
																H	106	150	99.3	-	0	0	108I150M34I	RM2|S1|R20566700/2	scaffold13.1_29#0
																H	106	150	99.3	-	0	0	46I150M96I	RM2|S1|R27709432/1	scaffold13.1_29#0
																H	106	150	99.3	-	0	0	61I150M81I	RM2|S1|R25530340/1	scaffold13.1_29#0
																H	107	150	100	-	0	0	49I150M93I	RM2|S1|R28313412/1	contig_2_8#0
																H	107	150	97.3	-	0	0	42I150M100I	RM2|S2|R44605264/2	contig_2_8#0
																H	107	150	97.3	-	0	0	44I150M98I	RM2|S2|R8589720/2	contig_2_8#0
																H	107	150	97.3	-	0	0	6I150M136I	RM2|S2|R30990123/1	contig_2_8#0
																H	107	150	98	+	0	0	93I150M49I	RM2|S2|R9773734/1	contig_2_8#0
																H	107	150	98	-	0	0	66I150M76I	RM2|S1|R37492495/1	contig_2_8#0
																H	107	150	98.1	+	0	0	45D105M187I	RM2|S1|R37492495/2	contig_2_8#0
																H	107	150	98.7	+	0	0	71I150M71I	RM2|S2|R17781398/1	contig_2_8#0
																H	107	150	98.7	-	0	0	215I77M73D	RM2|S2|R9773734/2	contig_2_8#0
																H	107	150	99	+	0	0	196I96M54D	RM2|S2|R47752608/2	contig_2_8#0
																H	107	150	99.3	+	0	0	52I150M90I	RM2|S2|R34576601/1	contig_2_8#0
																H	108	150	100	-	0	0	210I82M68D	RM2|S1|R17453769/1	contig_1_4#0
																H	108	150	100	-	0	0	211I81M69D	RM2|S1|R22417301/1	contig_1_4#0
																H	108	150	97.3	+	0	0	118I150M24I	RM2|S1|R17453769/2	contig_1_4#0
																H	108	150	97.3	-	0	0	20I150M122I	RM2|S2|R24947137/2	contig_1_4#0
																H	108	150	97.9	+	0	0	4D146M146I	RM2|S1|R23196601/1	contig_1_4#0
																H	108	150	98.7	+	0	0	61I150M81I	RM2|S1|R15389797/1	contig_1_4#0
																H	108	150	98.7	-	0	0	150M142I	RM2|S1|R42555705/1	contig_1_4#0
																H	108	150	98.7	-	0	0	6I150M136I	RM2|S2|R35836785/1	contig_1_4#0
																H	108	150	98.7	-	0	0	72I150M70I	RM2|S1|R15846737/1	contig_1_4#0
																H	108	150	98.7	-	0	0	79I150M63I	RM2|S1|R22614912/2	contig_1_4#0
																H	108	150	99.3	+	0	0	9I150M133I	RM2|S1|R36721548/1	contig_1_4#0
																H	11	150	100	+	0	0	114I150M28I	RM2|S2|R9300814/1	scaffold00006_3#0
																H	11	150	100	+	0	0	120I150M22I	RM2|S2|R4263206/1	scaffold00006_3#0
																H	11	150	100	+	0	0	157I135M15D	RM2|S2|R45565864/1	scaffold00006_3#0
																H	11	150	100	+	0	0	181I111M39D	RM2|S1|R8555707/1	scaffold00006_3#0
																H	11	150	100	+	0	0	196I96M54D	RM2|S2|R10957068/2	scaffold00006_3#0
																H	11	150	100	+	0	0	199I93M57D	RM2|S2|R34577762/1	scaffold00006_3#0
																H	11	150	100	+	0	0	203I89M61D	RM2|S2|R48625118/1	scaffold00006_3#0
																H	11	150	100	+	0	0	56D94M198I	RM2|S1|R5879760/1	scaffold00006_3#0
																H	11	150	100	+	0	0	74D76M216I	RM2|S1|R3969618/2	scaffold00006_3#0
																H	11	150	100	-	0	0	132I150M10I	RM2|S1|R29679722/1	scaffold00006_3#0
																H	11	150	100	-	0	0	176I116M34D	RM2|S2|R26096399/1	scaffold00006_3#0
																H	11	150	100	-	0	0	176I116M34D	RM2|S2|R45675260/1	scaffold00006_3#0
																H	11	150	100	-	0	0	217I75M75D	RM2|S2|R42942019/1	scaffold00006_3#0
																H	11	150	100	-	0	0	58D92M200I	RM2|S2|R14990869/2	scaffold00006_3#0
																H	11	150	100	-	0	0	5I150M137I	RM2|S1|R7959890/1	scaffold00006_3#0
																H	11	150	100	-	0	0	65D85M207I	RM2|S1|R12950514/2	scaffold00006_3#0
																H	11	150	100	-	0	0	68D82M210I	RM2|S1|R40381835/1	scaffold00006_3#0
																H	11	150	100	-	0	0	71I150M71I	RM2|S1|R48540361/1	scaffold00006_3#0
																H	11	150	100	-	0	0	72D78M214I	RM2|S1|R29116910/1	scaffold00006_3#0
																H	11	150	97	+	0	0	157I135M15D	RM2|S1|R17698419/1	scaffold00006_3#0
																H	11	150	97.1	+	0	0	13D137M155I	RM2|S2|R44839794/1	scaffold00006_3#0
																H	11	150	97.1	-	0	0	45D105M187I	RM2|S1|R18819155/2	scaffold00006_3#0
																H	11	150	97.2	+	0	0	148I144M6D	RM2|S1|R13745597/2	scaffold00006_3#0
																H	11	150	97.2	+	0	0	44D106M186I	RM2|S1|R48540361/2	scaffold00006_3#0
																H	11	150	97.2	+	0	0	8D142M150I	RM2|S1|R46567678/1	scaffold00006_3#0
																H	11	150	97.2	-	0	0	147I145M5D	RM2|S2|R9462925/1	scaffold00006_3#0
																H	11	150	97.2	-	0	0	150I142M8D	RM2|S2|R12980118/2	scaffold00006_3#0
																H	11	150	97.3	+	0	0	122I150M20I	RM2|S1|R1839311/2	scaffold00006_3#0
																H	11	150	97.3	+	0	0	130I150M12I	RM2|S2|R49746705/2	scaffold00006_3#0
																H	11	150	97.3	+	0	0	133I150M9I	RM2|S2|R47491412/1	scaffold00006_3#0
																H	11	150	97.3	+	0	0	134I150M8I	RM2|S2|R23017880/2	scaffold00006_3#0
																H	11	150	97.3	+	0	0	25I150M117I	RM2|S2|R40565349/1	scaffold00006_3#0
																H	11	150	97.3	+	0	0	32I150M110I	RM2|S1|R2406979/2	scaffold00006_3#0
																H	11	150	97.3	+	0	0	39D111M181I	RM2|S1|R48292030/2	scaffold00006_3#0
																H	11	150	97.3	+	0	0	46I150M96I	RM2|S2|R32984661/1	scaffold00006_3#0
																H	11	150	97.3	+	0	0	74I150M68I	RM2|S2|R20035841/2	scaffold00006_3#0
																H	11	150	97.3	+	0	0	79I150M63I	RM2|S2|R25620993/1	scaffold00006_3#0
																H	11	150	97.3	+	0	0	88I150M54I	RM2|S1|R48275109/2	scaffold00006_3#0
																H	11	150	97.3	+	0	0	90I150M52I	RM2|S2|R16353003/2	scaffold00006_3#0
																H	11	150	97.3	+	0	0	90I150M52I	RM2|S2|R40626038/1	scaffold00006_3#0
																H	11	150	97.3	+	0	0	93I150M49I	RM2|S1|R17334981/2	scaffold00006_3#0
																H	11	150	97.3	-	0	0	105I150M37I	RM2|S2|R23584657/1	scaffold00006_3#0
																H	11	150	97.3	-	0	0	118I150M24I	RM2|S1|R16798848/1	scaffold00006_3#0
																H	11	150	97.3	-	0	0	12I150M130I	RM2|S1|R31080796/1	scaffold00006_3#0
																H	11	150	97.3	-	0	0	132I150M10I	RM2|S2|R4686140/1	scaffold00006_3#0
																H	11	150	97.3	-	0	0	64I150M78I	RM2|S2|R35437082/2	scaffold00006_3#0
																H	11	150	97.3	-	0	0	90I150M52I	RM2|S1|R45061914/2	scaffold00006_3#0
																H	11	150	97.3	-	0	0	91I150M51I	RM2|S2|R44839794/2	scaffold00006_3#0
																H	11	150	97.4	+	0	0	175I117M33D	RM2|S1|R31767378/1	scaffold00006_3#0
																H	11	150	97.4	+	0	0	178I114M36D	RM2|S1|R21573128/2	scaffold00006_3#0
																H	11	150	97.4	+	0	0	215I77M73D	RM2|S2|R9423388/2	scaffold00006_3#0
																H	11	150	97.4	+	0	0	72D78M214I	RM2|S1|R37399922/1	scaffold00006_3#0
																H	11	150	97.4	-	0	0	177I115M35D	RM2|S2|R32335104/2	scaffold00006_3#0
																H	11	150	97.6	-	0	0	166I126M24D	RM2|S2|R18879111/2	scaffold00006_3#0
																H	11	150	97.7	+	0	0	161I131M19D	RM2|S1|R45048228/1	scaffold00006_3#0
																H	11	150	97.7	+	0	0	161I131M19D	RM2|S2|R3028761/1	scaffold00006_3#0
																H	11	150	97.7	-	0	0	163I129M21D	RM2|S1|R40044067/1	scaffold00006_3#0
																H	11	150	97.7	-	0	0	20D130M162I	RM2|S1|R10785073/2	scaffold00006_3#0
																H	11	150	97.7	-	0	0	64D86M206I	RM2|S2|R45621043/2	scaffold00006_3#0
																H	11	150	97.8	+	0	0	154I138M12D	RM2|S2|R24139690/1	scaffold00006_3#0
																H	11	150	97.8	+	0	0	199I93M57D	RM2|S2|R3770635/1	scaffold00006_3#0
																H	11	150	97.8	+	0	0	57D93M199I	RM2|S2|R28202305/1	scaffold00006_3#0
																H	11	150	97.8	-	0	0	157I135M15D	RM2|S2|R12102272/2	scaffold00006_3#0
																H	11	150	97.8	-	0	0	203I89M61D	RM2|S2|R20035841/1	scaffold00006_3#0
																H	11	150	97.9	-	0	0	147I145M5D	RM2|S1|R12552412/1	scaffold00006_3#0
																H	11	150	97.9	-	0	0	195I97M53D	RM2|S1|R17334981/1	scaffold00006_3#0
																H	11	150	97.9	-	0	0	54D96M196I	RM2|S1|R28572001/2	scaffold00006_3#0
																H	11	150	98	+	0	0	102I150M40I	RM2|S2|R8364601/1	scaffold00006_3#0
																H	11	150	98	+	0	0	104I150M38I	RM2|S1|R49085472/2	scaffold00006_3#0
																H	11	150	98	+	0	0	110I150M32I	RM2|S2|R39459535/1	scaffold00006_3#0
																H	11	150	98	+	0	0	114I150M28I	RM2|S2|R29510807/2	scaffold00006_3#0
																H	11	150	98	+	0	0	126I150M16I	RM2|S2|R41536968/2	scaffold00006_3#0
																H	11	150	98	+	0	0	136I150M6I	RM2|S2|R15263949/2	scaffold00006_3#0
																H	11	150	98	+	0	0	138I150M4I	RM2|S2|R40556730/1	scaffold00006_3#0
																H	11	150	98	+	0	0	140I150M2I	RM2|S2|R38420138/1	scaffold00006_3#0
																H	11	150	98	+	0	0	150M142I	RM2|S1|R16798848/2	scaffold00006_3#0
																H	11	150	98	+	0	0	190I102M48D	RM2|S2|R22015840/1	scaffold00006_3#0
																H	11	150	98	+	0	0	27I150M115I	RM2|S2|R4009573/2	scaffold00006_3#0
																H	11	150	98	+	0	0	35I150M107I	RM2|S1|R13888056/1	scaffold00006_3#0
																H	11	150	98	+	0	0	38I150M104I	RM2|S1|R40044067/2	scaffold00006_3#0
																H	11	150	98	+	0	0	45I150M97I	RM2|S2|R3592203/2	scaffold00006_3#0
																H	11	150	98	+	0	0	50I150M92I	RM2|S2|R32335104/1	scaffold00006_3#0
																H	11	150	98	+	0	0	63I150M79I	RM2|S1|R25290571/1	scaffold00006_3#0
																H	11	150	98	+	0	0	63I150M79I	RM2|S2|R12980118/1	scaffold00006_3#0
																H	11	150	98	+	0	0	68I150M74I	RM2|S2|R5827150/1	scaffold00006_3#0
																H	11	150	98	+	0	0	80I150M62I	RM2|S2|R12102272/1	scaffold00006_3#0
																H	11	150	98	+	0	0	89I150M53I	RM2|S1|R10282589/2	scaffold00006_3#0
																H	11	150	98	-	0	0	143I149MD	RM2|S2|R38072666/1	scaffold00006_3#0
																H	11	150	98	-	0	0	27I150M115I	RM2|S2|R11153390/2	scaffold00006_3#0
																H	11	150	98	-	0	0	2I150M140I	RM2|S2|R28039611/2	scaffold00006_3#0
																H	11	150	98	-	0	0	32I150M110I	RM2|S2|R4348875/2	scaffold00006_3#0
																H	11	150	98	-	0	0	42I150M100I	RM2|S2|R12872272/1	scaffold00006_3#0
																H	11	150	98	-	0	0	43I150M99I	RM2|S2|R38653550/1	scaffold00006_3#0
																H	11	150	98	-	0	0	45I150M97I	RM2|S1|R28106947/2	scaffold00006_3#0
																H	11	150	98	-	0	0	57I150M85I	RM2|S1|R42209151/1	scaffold00006_3#0
																H	11	150	98	-	0	0	58I150M84I	RM2|S2|R19439867/2	scaffold00006_3#0
																H	11	150	98	-	0	0	86I150M56I	RM2|S1|R5879760/2	scaffold00006_3#0
																H	11	150	98.1	+	0	0	189I103M47D	RM2|S2|R3375151/1	scaffold00006_3#0
																H	11	150	98.1	-	0	0	44D106M186I	RM2|S2|R33110708/1	scaffold00006_3#0
																H	11	150	98.1	-	0	0	45D105M187I	RM2|S1|R21294434/2	scaffold00006_3#0
																H	11	150	98.2	+	0	0	40D110M182I	RM2|S2|R19439867/1	scaffold00006_3#0
																H	11	150	98.2	-	0	0	180I112M38D	RM2|S2|R18151594/2	scaffold00006_3#0
																H	11	150	98.3	+	0	0	174I118M32D	RM2|S2|R8413038/1	scaffold00006_3#0
																H	11	150	98.3	-	0	0	172I120M30D	RM2|S1|R19492720/2	scaffold00006_3#0
																H	11	150	98.3	-	0	0	173I119M31D	RM2|S1|R4170976/1	scaffold00006_3#0
																H	11	150	98.3	-	0	0	33D117M175I	RM2|S1|R18985203/1	scaffold00006_3#0
																H	11	150	98.4	+	0	0	164I128M22D	RM2|S2|R14003056/1	scaffold00006_3#0
																H	11	150	98.4	+	0	0	165I127M23D	RM2|S2|R16032079/2	scaffold00006_3#0
																H	11	150	98.4	+	0	0	170I122M28D	RM2|S2|R39969744/1	scaffold00006_3#0
																H	11	150	98.4	+	0	0	21D129M163I	RM2|S2|R2687253/1	scaffold00006_3#0
																H	11	150	98.4	+	0	0	22D128M164I	RM2|S2|R12717934/1	scaffold00006_3#0
																H	11	150	98.4	+	0	0	23D127M165I	RM2|S2|R6351561/2	scaffold00006_3#0
																H	11	150	98.4	+	0	0	28D122M170I	RM2|S2|R40863412/1	scaffold00006_3#0
																H	11	150	98.4	-	0	0	165I127M23D	RM2|S1|R13888056/2	scaffold00006_3#0
																H	11	150	98.5	-	0	0	155I137M13D	RM2|S1|R6726258/1	scaffold00006_3#0
																H	11	150	98.5	-	0	0	15D135M157I	RM2|S2|R11216653/2	scaffold00006_3#0
																H	11	150	98.5	-	0	0	161I131M19D	RM2|S1|R2821457/2	scaffold00006_3#0
																H	11	150	98.5	-	0	0	17D133M159I	RM2|S2|R33441910/1	scaffold00006_3#0
																H	11	150	98.6	+	0	0	4D146M146I	RM2|S2|R48260255/1	scaffold00006_3#0
																H	11	150	98.6	-	0	0	12D138M154I	RM2|S1|R43534199/1	scaffold00006_3#0
																H	11	150	98.6	-	0	0	3D147M145I	RM2|S1|R8806654/2	scaffold00006_3#0
																H	11	150	98.7	+	0	0	114I150M28I	RM2|S1|R3220802/1	scaffold00006_3#0
																H	11	150	98.7	+	0	0	143I149MD	RM2|S1|R10093243/1	scaffold00006_3#0
																H	11	150	98.7	+	0	0	17I150M125I	RM2|S1|R2544540/1	scaffold00006_3#0
																H	11	150	98.7	+	0	0	2I150M140I	RM2|S1|R37798801/1	scaffold00006_3#0
																H	11	150	98.7	+	0	0	38I150M104I	RM2|S2|R18151594/1	scaffold00006_3#0
																H	11	150	98.7	+	0	0	59I150M83I	RM2|S1|R45883591/1	scaffold00006_3#0
																H	11	150	98.7	+	0	0	62I150M80I	RM2|S1|R10050476/1	scaffold00006_3#0
																H	11	150	98.7	+	0	0	63I150M79I	RM2|S2|R26096399/2	scaffold00006_3#0
																H	11	150	98.7	+	0	0	6I150M136I	RM2|S1|R14261479/1	scaffold00006_3#0
																H	11	150	98.7	+	0	0	75D75M217I	RM2|S2|R17640541/1	scaffold00006_3#0
																H	11	150	98.7	+	0	0	84I150M58I	RM2|S2|R40587504/2	scaffold00006_3#0
																H	11	150	98.7	+	0	0	92I150M50I	RM2|S1|R25397668/1	scaffold00006_3#0
																H	11	150	98.7	+	0	0	93I150M49I	RM2|S2|R26140863/1	scaffold00006_3#0
																H	11	150	98.7	-	0	0	104I150M38I	RM2|S2|R4143307/1	scaffold00006_3#0
																H	11	150	98.7	-	0	0	11I150M131I	RM2|S1|R16564361/2	scaffold00006_3#0
																H	11	150	98.7	-	0	0	127I150M15I	RM2|S2|R3592203/1	scaffold00006_3#0
																H	11	150	98.7	-	0	0	128I150M14I	RM2|S1|R35750968/2	scaffold00006_3#0
																H	11	150	98.7	-	0	0	132I150M10I	RM2|S2|R4009573/1	scaffold00006_3#0
																H	11	150	98.7	-	0	0	142I150M	RM2|S2|R32984661/2	scaffold00006_3#0
																H	11	150	98.7	-	0	0	43I150M99I	RM2|S2|R44513129/1	scaffold00006_3#0
																H	11	150	98.7	-	0	0	47I150M95I	RM2|S2|R2832555/1	scaffold00006_3#0
																H	11	150	98.7	-	0	0	49I150M93I	RM2|S1|R36234819/2	scaffold00006_3#0
																H	11	150	98.7	-	0	0	51I150M91I	RM2|S1|R3969618/1	scaffold00006_3#0
																H	11	150	98.7	-	0	0	65I150M77I	RM2|S2|R35670178/2	scaffold00006_3#0
																H	11	150	98.7	-	0	0	72D78M214I	RM2|S1|R29800103/2	scaffold00006_3#0
																H	11	150	98.7	-	0	0	72D78M214I	RM2|S2|R47527025/2	scaffold00006_3#0
																H	11	150	98.7	-	0	0	75D75M217I	RM2|S2|R5176167/2	scaffold00006_3#0
																H	11	150	98.7	-	0	0	78I150M64I	RM2|S2|R6505427/2	scaffold00006_3#0
																H	11	150	98.7	-	0	0	89I150M53I	RM2|S2|R19872435/1	scaffold00006_3#0
																H	11	150	98.8	+	0	0	209I83M67D	RM2|S2|R1281987/1	scaffold00006_3#0
																H	11	150	98.8	-	0	0	209I83M67D	RM2|S2|R34395321/2	scaffold00006_3#0
																H	11	150	98.8	-	0	0	69D81M211I	RM2|S1|R8269737/2	scaffold00006_3#0
																H	11	150	98.9	+	0	0	197I95M55D	RM2|S1|R38985059/1	scaffold00006_3#0
																H	11	150	98.9	+	0	0	202I90M60D	RM2|S1|R36424806/2	scaffold00006_3#0
																H	11	150	98.9	+	0	0	205I87M63D	RM2|S2|R20415162/1	scaffold00006_3#0
																H	11	150	98.9	-	0	0	57D93M199I	RM2|S2|R37838279/1	scaffold00006_3#0
																H	11	150	99	+	0	0	188I104M46D	RM2|S1|R9591359/1	scaffold00006_3#0
																H	11	150	99	-	0	0	52D98M194I	RM2|S2|R15955542/1	scaffold00006_3#0
																H	11	150	99	-	0	0	53D97M195I	RM2|S2|R15085271/2	scaffold00006_3#0
																H	11	150	99.1	+	0	0	180I112M38D	RM2|S2|R25448540/1	scaffold00006_3#0
																H	11	150	99.1	+	0	0	40D110M182I	RM2|S2|R49159406/1	scaffold00006_3#0
																H	11	150	99.1	-	0	0	34D116M176I	RM2|S2|R25095331/2	scaffold00006_3#0
																H	11	150	99.1	-	0	0	35D115M177I	RM2|S1|R26534986/1	scaffold00006_3#0
																H	11	150	99.1	-	0	0	38D112M180I	RM2|S2|R10406916/2	scaffold00006_3#0
																H	11	150	99.1	-	0	0	40D110M182I	RM2|S2|R39920695/1	scaffold00006_3#0
																H	11	150	99.2	+	0	0	167I125M25D	RM2|S2|R41112404/1	scaffold00006_3#0
																H	11	150	99.2	+	0	0	17D133M159I	RM2|S2|R25389970/1	scaffold00006_3#0
																H	11	150	99.2	+	0	0	32D118M174I	RM2|S2|R35670178/1	scaffold00006_3#0
																H	11	150	99.2	-	0	0	164I128M22D	RM2|S1|R6546755/1	scaffold00006_3#0
																H	11	150	99.2	-	0	0	23D127M165I	RM2|S1|R37035559/1	scaffold00006_3#0
																H	11	150	99.3	+	0	0	112I150M30I	RM2|S2|R23427063/1	scaffold00006_3#0
																H	11	150	99.3	+	0	0	117I150M25I	RM2|S1|R44622783/1	scaffold00006_3#0
																H	11	150	99.3	+	0	0	145I147M3D	RM2|S1|R5599682/1	scaffold00006_3#0
																H	11	150	99.3	+	0	0	146I146M4D	RM2|S2|R25772666/1	scaffold00006_3#0
																H	11	150	99.3	+	0	0	147I145M5D	RM2|S2|R13099354/1	scaffold00006_3#0
																H	11	150	99.3	+	0	0	34I150M108I	RM2|S2|R12361618/1	scaffold00006_3#0
																H	11	150	99.3	+	0	0	39I150M103I	RM2|S1|R2821457/1	scaffold00006_3#0
																H	11	150	99.3	+	0	0	57I150M85I	RM2|S1|R19492720/1	scaffold00006_3#0
																H	11	150	99.3	+	0	0	57I150M85I	RM2|S2|R34395321/1	scaffold00006_3#0
																H	11	150	99.3	+	0	0	62I150M80I	RM2|S1|R19706522/1	scaffold00006_3#0
																H	11	150	99.3	+	0	0	66I150M76I	RM2|S1|R35750968/1	scaffold00006_3#0
																H	11	150	99.3	+	0	0	72I150M70I	RM2|S2|R29418345/1	scaffold00006_3#0
																H	11	150	99.3	-	0	0	10D140M152I	RM2|S2|R38378722/1	scaffold00006_3#0
																H	11	150	99.3	-	0	0	115I150M27I	RM2|S2|R28202305/2	scaffold00006_3#0
																H	11	150	99.3	-	0	0	118I150M24I	RM2|S2|R15845148/1	scaffold00006_3#0
																H	11	150	99.3	-	0	0	127I150M15I	RM2|S2|R6351561/1	scaffold00006_3#0
																H	11	150	99.3	-	0	0	128I150M14I	RM2|S2|R49159406/2	scaffold00006_3#0
																H	11	150	99.3	-	0	0	147I145M5D	RM2|S2|R14500622/1	scaffold00006_3#0
																H	11	150	99.3	-	0	0	63I150M79I	RM2|S1|R22599661/1	scaffold00006_3#0
																H	11	150	99.3	-	0	0	72I150M70I	RM2|S1|R4642361/1	scaffold00006_3#0
																H	11	150	99.3	-	0	0	73I150M69I	RM2|S2|R11919543/1	scaffold00006_3#0
																H	11	150	99.3	-	0	0	84I150M58I	RM2|S2|R24582101/1	scaffold00006_3#0
																H	13	150	100	+	0	0	135I150M6I	RM2|S1|R48601188/1	NODE_2_length_1634_cov_86.146881#0
																H	13	150	100	+	0	0	208I83M67D	RM2|S2|R10837235/2	NODE_2_length_1634_cov_86.146881#0
																H	13	150	100	-	0	0	215I76M74D	RM2|S2|R31318251/1	NODE_2_length_1634_cov_86.146881#0
																H	13	150	97.2	-	0	0	150I141M9D	RM2|S2|R43348155/1	NODE_2_length_1634_cov_86.146881#0
																H	13	150	97.3	-	0	0	83I150M58I	RM2|S2|R20358934/1	NODE_2_length_1634_cov_86.146881#0
																H	13	150	97.4	+	0	0	33D117M174I	RM2|S2|R20358934/2	NODE_2_length_1634_cov_86.146881#0
																H	13	150	98	+	0	0	110I150M31I	RM2|S2|R44869166/2	NODE_2_length_1634_cov_86.146881#0
																H	13	150	98	+	0	0	78I150M63I	RM2|S2|R37406106/1	NODE_2_length_1634_cov_86.146881#0
																H	13	150	98.6	-	0	0	152I139M11D	RM2|S2|R25147467/1	NODE_2_length_1634_cov_86.146881#0
																H	13	150	98.7	+	0	0	26I150M115I	RM2|S2|R25147467/2	NODE_2_length_1634_cov_86.146881#0
																H	13	150	98.7	+	0	0	58I150M83I	RM2|S2|R41737317/1	NODE_2_length_1634_cov_86.146881#0
																H	13	150	98.7	-	0	0	28I150M113I	RM2|S2|R24762941/2	NODE_2_length_1634_cov_86.146881#0
																H	13	150	98.8	-	0	0	205I86M64D	RM2|S2|R44869166/1	NODE_2_length_1634_cov_86.146881#0
																H	13	150	98.9	-	0	0	196I95M55D	RM2|S1|R19943297/1	NODE_2_length_1634_cov_86.146881#0
																H	13	150	99	+	0	0	50D100M191I	RM2|S2|R24762941/1	NODE_2_length_1634_cov_86.146881#0
																H	13	150	99.1	-	0	0	36D114M177I	RM2|S2|R3807735/2	NODE_2_length_1634_cov_86.146881#0
																H	13	150	99.3	-	0	0	10D140M151I	RM2|S2|R5535723/1	NODE_2_length_1634_cov_86.146881#0
																H	13	150	99.3	-	0	0	115I150M26I	RM2|S2|R42965417/1	NODE_2_length_1634_cov_86.146881#0
																H	14	150	100	+	0	0	13D137M154I	RM2|S2|R320283/1	scaffold00001_61#0
																H	14	150	100	-	0	0	35D115M176I	RM2|S2|R10169674/1	scaffold00001_61#0
																H	14	150	97.8	-	0	0	155I136M14D	RM2|S2|R233773/1	scaffold00001_61#0
																H	14	150	97.9	+	0	0	7D143M148I	RM2|S2|R25126905/1	scaffold00001_61#0
																H	14	150	97.9	-	0	0	10D140M151I	RM2|S2|R37162087/2	scaffold00001_61#0
																H	14	150	98	+	0	0	144I147M3D	RM2|S2|R40461093/2	scaffold00001_61#0
																H	14	150	98	+	0	0	79I150M62I	RM2|S2|R233773/2	scaffold00001_61#0
																H	14	150	98.6	+	0	0	3D147M144I	RM2|S2|R21762257/1	scaffold00001_61#0
																H	14	150	98.7	+	0	0	139I150M2I	RM2|S2|R24686045/1	scaffold00001_61#0
																H	14	150	98.7	+	0	0	60I150M81I	RM2|S2|R3077698/1	scaffold00001_61#0
																H	14	150	98.7	+	0	0	62I150M79I	RM2|S2|R33694939/1	scaffold00001_61#0
																H	14	150	98.7	+	0	0	91I150M50I	RM2|S2|R33546387/1	scaffold00001_61#0
																H	14	150	99.1	-	0	0	177I114M36D	RM2|S2|R33546387/2	scaffold00001_61#0
																H	14	150	99.1	-	0	0	35D115M176I	RM2|S2|R14413273/2	scaffold00001_61#0
																H	14	150	99.1	-	0	0	43D107M184I	RM2|S2|R19538015/2	scaffold00001_61#0
																H	14	150	99.2	+	0	0	171I120M30D	RM2|S2|R9107512/1	scaffold00001_61#0
																H	14	150	99.3	+	0	0	148I143M7D	RM2|S2|R8240388/1	scaffold00001_61#0
																H	14	150	99.3	-	0	0	14I150M127I	RM2|S2|R5103402/1	scaffold00001_61#0
																H	14	150	99.3	-	0	0	33I150M108I	RM2|S2|R28103892/2	scaffold00001_61#0
																H	15	150	100	+	0	0	194I98M52D	RM2|S2|R20936518/1	scaffold00001_4#0
																H	15	150	100	-	0	0	50D100M192I	RM2|S2|R1406504/1	scaffold00001_4#0
																H	15	150	97.1	+	0	0	188I104M46D	RM2|S2|R37424454/1	scaffold00001_4#0
																H	15	150	97.1	-	0	0	153I139M11D	RM2|S2|R199692/1	scaffold00001_4#0
																H	15	150	97.3	+	0	0	110I150M32I	RM2|S2|R21273561/2	scaffold00001_4#0
																H	15	150	97.3	-	0	0	130I150M12I	RM2|S2|R34017977/2	scaffold00001_4#0
																H	15	150	97.3	-	0	0	45I150M97I	RM2|S2|R35506738/1	scaffold00001_4#0
																H	15	150	97.3	-	0	0	81I150M61I	RM2|S2|R45601822/1	scaffold00001_4#0
																H	15	150	97.5	+	0	0	70D80M212I	RM2|S2|R4881119/1	scaffold00001_4#0
																H	15	150	97.6	-	0	0	207I85M65D	RM2|S2|R21273561/1	scaffold00001_4#0
																H	15	150	97.7	-	0	0	19D131M161I	RM2|S2|R17852661/2	scaffold00001_4#0
																H	15	150	97.8	+	0	0	200I92M58D	RM2|S2|R28000320/1	scaffold00001_4#0
																H	15	150	98	+	0	0	130I150M12I	RM2|S2|R49498857/1	scaffold00001_4#0
																H	15	150	98	+	0	0	85I150M57I	RM2|S2|R44811723/1	scaffold00001_4#0
																H	15	150	98	+	0	0	D149M143I	RM2|S2|R12198580/1	scaffold00001_4#0
																H	15	150	98	-	0	0	104I150M38I	RM2|S2|R13917133/1	scaffold00001_4#0
																H	15	150	98	-	0	0	138I150M4I	RM2|S2|R12198580/2	scaffold00001_4#0
																H	15	150	98	-	0	0	64I150M78I	RM2|S2|R5921977/2	scaffold00001_4#0
																H	15	150	98	-	0	0	66I150M76I	RM2|S2|R4881119/2	scaffold00001_4#0
																H	15	150	98.3	-	0	0	171I121M29D	RM2|S2|R28211956/1	scaffold00001_4#0
																H	15	150	98.7	+	0	0	103I150M39I	RM2|S2|R18298533/1	scaffold00001_4#0
																H	15	150	98.7	-	0	0	126I150M16I	RM2|S2|R49624487/2	scaffold00001_4#0
																H	15	150	98.7	-	0	0	150M142I	RM2|S2|R11365877/1	scaffold00001_4#0
																H	15	150	99	-	0	0	46D104M188I	RM2|S2|R33709332/1	scaffold00001_4#0
																H	15	150	99.1	-	0	0	41D109M183I	RM2|S2|R32978721/2	scaffold00001_4#0
																H	15	150	99.3	+	0	0	126I150M16I	RM2|S2|R1795819/1	scaffold00001_4#0
																H	15	150	99.3	+	0	0	19I150M123I	RM2|S2|R49624487/1	scaffold00001_4#0
																H	15	150	99.3	+	0	0	87I150M55I	RM2|S2|R21507992/1	scaffold00001_4#0
																H	15	150	99.3	-	0	0	69I150M73I	RM2|S2|R35083938/1	scaffold00001_4#0
																H	16	150	100	+	0	0	214I79M71D	RM2|S2|R31528662/2	NODE_1_length_1627_cov_58.757221#0
																H	16	150	100	+	0	0	216I77M73D	RM2|S1|R9284927/1	NODE_1_length_1627_cov_58.757221#0
																H	16	150	100	+	0	0	73D77M216I	RM2|S2|R35951670/1	NODE_1_length_1627_cov_58.757221#0
																H	16	150	100	-	0	0	15I150M128I	RM2|S2|R10249309/1	NODE_1_length_1627_cov_58.757221#0
																H	16	150	100	-	0	0	40D110M183I	RM2|S2|R40942988/1	NODE_1_length_1627_cov_58.757221#0
																H	16	150	100	-	0	0	71D79M214I	RM2|S1|R48486884/1	NODE_1_length_1627_cov_58.757221#0
																H	16	150	97.1	+	0	0	45D105M188I	RM2|S1|R42795887/2	NODE_1_length_1627_cov_58.757221#0
																H	16	150	97.3	-	0	0	10I150M133I	RM2|S2|R6972050/2	NODE_1_length_1627_cov_58.757221#0
																H	16	150	97.3	-	0	0	146I147M3D	RM2|S2|R42941502/1	NODE_1_length_1627_cov_58.757221#0
																H	16	150	97.3	-	0	0	17I150M126I	RM2|S2|R47005504/1	NODE_1_length_1627_cov_58.757221#0
																H	16	150	97.3	-	0	0	38I150M105I	RM2|S2|R13653625/1	NODE_1_length_1627_cov_58.757221#0
																H	16	150	97.3	-	0	0	39D111M182I	RM2|S2|R30045161/1	NODE_1_length_1627_cov_58.757221#0
																H	16	150	97.7	-	0	0	62D88M205I	RM2|S2|R44069543/1	NODE_1_length_1627_cov_58.757221#0
																H	16	150	97.9	+	0	0	197I96M54D	RM2|S1|R15896671/2	NODE_1_length_1627_cov_58.757221#0
																H	16	150	98	+	0	0	123I150M20I	RM2|S2|R44068239/1	NODE_1_length_1627_cov_58.757221#0
																H	16	150	98	+	0	0	48D102M191I	RM2|S1|R11603469/1	NODE_1_length_1627_cov_58.757221#0
																H	16	150	98	+	0	0	63I150M80I	RM2|S1|R46092595/2	NODE_1_length_1627_cov_58.757221#0
																H	16	150	98	-	0	0	105I150M38I	RM2|S1|R3478094/2	NODE_1_length_1627_cov_58.757221#0
																H	16	150	98	-	0	0	142I150MI	RM2|S2|R15583241/1	NODE_1_length_1627_cov_58.757221#0
																H	16	150	98	-	0	0	48I150M95I	RM2|S1|R11603469/2	NODE_1_length_1627_cov_58.757221#0
																H	16	150	98.1	-	0	0	44D106M187I	RM2|S2|R33126619/1	NODE_1_length_1627_cov_58.757221#0
																H	16	150	98.2	+	0	0	180I113M37D	RM2|S2|R28163103/1	NODE_1_length_1627_cov_58.757221#0
																H	16	150	98.4	+	0	0	22D128M165I	RM2|S2|R33622662/1	NODE_1_length_1627_cov_58.757221#0
																H	16	150	98.5	+	0	0	159I134M16D	RM2|S2|R39680853/2	NODE_1_length_1627_cov_58.757221#0
																H	16	150	98.5	+	0	0	160I133M17D	RM2|S2|R40954088/2	NODE_1_length_1627_cov_58.757221#0
																H	16	150	98.5	+	0	0	17D133M160I	RM2|S1|R3478094/1	NODE_1_length_1627_cov_58.757221#0
																H	16	150	98.5	-	0	0	16D134M159I	RM2|S2|R10140248/1	NODE_1_length_1627_cov_58.757221#0
																H	16	150	98.7	+	0	0	121I150M22I	RM2|S2|R24729293/1	NODE_1_length_1627_cov_58.757221#0
																H	16	150	98.7	+	0	0	136I150M7I	RM2|S2|R49509949/1	NODE_1_length_1627_cov_58.757221#0
																H	16	150	98.7	+	0	0	20I150M123I	RM2|S2|R37731276/1	NODE_1_length_1627_cov_58.757221#0
																H	16	150	98.7	+	0	0	26I150M117I	RM2|S2|R23215888/2	NODE_1_length_1627_cov_58.757221#0
																H	16	150	98.7	+	0	0	93I150M50I	RM2|S2|R26167611/1	NODE_1_length_1627_cov_58.757221#0
																H	16	150	98.7	+	0	0	93I150M50I	RM2|S2|R49449438/1	NODE_1_length_1627_cov_58.757221#0
																H	16	150	98.7	-	0	0	23I150M120I	RM2|S1|R9597304/1	NODE_1_length_1627_cov_58.757221#0
																H	16	150	98.7	-	0	0	90I150M53I	RM2|S2|R37786021/1	NODE_1_length_1627_cov_58.757221#0
																H	16	150	99	+	0	0	190I103M47D	RM2|S2|R28559678/1	NODE_1_length_1627_cov_58.757221#0
																H	16	150	99	+	0	0	48D102M191I	RM2|S2|R6972050/1	NODE_1_length_1627_cov_58.757221#0
																H	16	150	99	-	0	0	194I99M51D	RM2|S1|R46092595/1	NODE_1_length_1627_cov_58.757221#0
																H	16	150	99	-	0	0	45D105M188I	RM2|S2|R43030853/1	NODE_1_length_1627_cov_58.757221#0
																H	16	150	99.1	-	0	0	33D117M176I	RM2|S1|R41850611/1	NODE_1_length_1627_cov_58.757221#0
																H	16	150	99.2	-	0	0	31D119M174I	RM2|S2|R22354905/1	NODE_1_length_1627_cov_58.757221#0
																H	16	150	99.3	+	0	0	15D135M158I	RM2|S2|R28173989/1	NODE_1_length_1627_cov_58.757221#0
																H	16	150	99.3	+	0	0	29I150M114I	RM2|S2|R14557816/1	NODE_1_length_1627_cov_58.757221#0
																H	16	150	99.3	-	0	0	60I150M83I	RM2|S2|R21006270/1	NODE_1_length_1627_cov_58.757221#0
																H	17	150	100	+	0	0	188I104M46D	RM2|S2|R37461566/1	scaffold00025_13#0
																H	17	150	100	+	0	0	194I98M52D	RM2|S2|R26516897/1	scaffold00025_13#0
																H	17	150	100	+	0	0	209I83M67D	RM2|S2|R46643114/1	scaffold00025_13#0
																H	17	150	97.3	+	0	0	140I150M2I	RM2|S2|R5315208/2	scaffold00025_13#0
																H	17	150	97.3	-	0	0	72I150M70I	RM2|S2|R44098091/2	scaffold00025_13#0
																H	17	150	97.8	+	0	0	154I138M12D	RM2|S2|R10993600/1	scaffold00025_13#0
																H	17	150	97.8	-	0	0	13D137M155I	RM2|S2|R31385578/1	scaffold00025_13#0
																H	17	150	98.4	+	0	0	165I127M23D	RM2|S2|R30963432/2	scaffold00025_13#0
																H	17	150	98.5	-	0	0	19D131M161I	RM2|S2|R11907022/1	scaffold00025_13#0
																H	17	150	98.7	+	0	0	92I150M50I	RM2|S2|R34257320/2	scaffold00025_13#0
																H	17	150	98.7	-	0	0	130I150M12I	RM2|S2|R17604065/1	scaffold00025_13#0
																H	17	150	98.7	-	0	0	85I150M57I	RM2|S2|R8645293/1	scaffold00025_13#0
																H	17	150	98.8	+	0	0	212I80M70D	RM2|S2|R32772558/2	scaffold00025_13#0
																H	17	150	99	+	0	0	50D100M192I	RM2|S2|R44098091/1	scaffold00025_13#0
																H	17	150	99.3	+	0	0	150M142I	RM2|S2|R12215516/1	scaffold00025_13#0
																H	17	150	99.3	-	0	0	31I150M111I	RM2|S2|R2399975/1	scaffold00025_13#0
																H	18	150	100	-	0	0	28D122M170I	RM2|S1|R24038690/1	NODE_2_length_1542_cov_74.731514#0
																H	18	150	100	-	0	0	40D110M182I	RM2|S1|R40907315/1	NODE_2_length_1542_cov_74.731514#0
																H	18	150	97	+	0	0	49D101M191I	RM2|S1|R29443930/1	NODE_2_length_1542_cov_74.731514#0
																H	18	150	97.2	+	0	0	147I145M5D	RM2|S1|R46100420/2	NODE_2_length_1542_cov_74.731514#0
																H	18	150	97.2	-	0	0	183I109M41D	RM2|S1|R23323332/1	NODE_2_length_1542_cov_74.731514#0
																H	18	150	97.2	-	0	0	43D107M185I	RM2|S1|R10133787/2	NODE_2_length_1542_cov_74.731514#0
																H	18	150	97.3	-	0	0	134I150M8I	RM2|S1|R29969831/1	NODE_2_length_1542_cov_74.731514#0
																H	18	150	97.3	-	0	0	135I150M7I	RM2|S2|R8605050/1	NODE_2_length_1542_cov_74.731514#0
																H	18	150	97.3	-	0	0	47I150M95I	RM2|S1|R2575245/1	NODE_2_length_1542_cov_74.731514#0
																H	18	150	97.3	-	0	0	68I150M74I	RM2|S1|R49018001/2	NODE_2_length_1542_cov_74.731514#0
																H	18	150	97.5	+	0	0	212I80M70D	RM2|S1|R18588124/2	NODE_2_length_1542_cov_74.731514#0
																H	18	150	97.8	+	0	0	16D134M158I	RM2|S1|R38303842/1	NODE_2_length_1542_cov_74.731514#0
																H	18	150	97.8	+	0	0	59D91M201I	RM2|S1|R7271711/1	NODE_2_length_1542_cov_74.731514#0
																H	18	150	98	+	0	0	68I150M74I	RM2|S1|R23323332/2	NODE_2_length_1542_cov_74.731514#0
																H	18	150	98	-	0	0	121I150M21I	RM2|S1|R40382781/1	NODE_2_length_1542_cov_74.731514#0
																H	18	150	98	-	0	0	18I150M124I	RM2|S1|R49145792/1	NODE_2_length_1542_cov_74.731514#0
																H	18	150	98.5	+	0	0	15D135M157I	RM2|S1|R49018001/1	NODE_2_length_1542_cov_74.731514#0
																H	18	150	98.7	-	0	0	45I150M97I	RM2|S1|R29443930/2	NODE_2_length_1542_cov_74.731514#0
																H	18	150	98.7	-	0	0	9I150M133I	RM2|S1|R37364780/2	NODE_2_length_1542_cov_74.731514#0
																H	18	150	98.9	+	0	0	197I95M55D	RM2|S1|R27764523/1	NODE_2_length_1542_cov_74.731514#0
																H	18	150	99.3	-	0	0	118I150M24I	RM2|S1|R38303842/2	NODE_2_length_1542_cov_74.731514#0
																H	18	150	99.3	-	0	0	4I150M138I	RM2|S1|R29426121/1	NODE_2_length_1542_cov_74.731514#0
																H	18	150	99.3	-	0	0	62I150M80I	RM2|S1|R7271711/2	NODE_2_length_1542_cov_74.731514#0
																H	20	150	98	+	0	0	107I150M35I	RM2|S2|R36440949/1	NODE_2_length_1420_cov_67.210564#0
																H	20	150	98	+	0	0	128I150M14I	RM2|S2|R40588444/1	NODE_2_length_1420_cov_67.210564#0
																H	20	150	98.7	+	0	0	77I150M65I	RM2|S2|R48053324/1	NODE_2_length_1420_cov_67.210564#0
																H	20	150	99.3	+	0	0	8I150M134I	RM2|S2|R39690345/1	NODE_2_length_1420_cov_67.210564#0
																H	21	150	100	+	0	0	109I150M33I	RM2|S2|R5761523/1	NODE_1_length_1097_cov_82.064720#0
																H	21	150	100	+	0	0	217I75M75D	RM2|S2|R40796069/2	NODE_1_length_1097_cov_82.064720#0
																H	21	150	97.1	-	0	0	14D136M156I	RM2|S2|R20101669/2	NODE_1_length_1097_cov_82.064720#0
																H	21	150	97.1	-	0	0	190I102M48D	RM2|S2|R8052645/1	NODE_1_length_1097_cov_82.064720#0
																H	21	150	97.2	+	0	0	149I143M7D	RM2|S2|R35952184/1	NODE_1_length_1097_cov_82.064720#0
																H	21	150	97.3	+	0	0	13I150M129I	RM2|S2|R16793406/1	NODE_1_length_1097_cov_82.064720#0
																H	21	150	97.3	+	0	0	24I150M118I	RM2|S2|R8443908/1	NODE_1_length_1097_cov_82.064720#0
																H	21	150	97.3	-	0	0	85I150M57I	RM2|S2|R106640/2	NODE_1_length_1097_cov_82.064720#0
																H	21	150	97.7	-	0	0	161I131M19D	RM2|S2|R48872908/1	NODE_1_length_1097_cov_82.064720#0
																H	21	150	97.8	+	0	0	203I89M61D	RM2|S2|R11829656/2	NODE_1_length_1097_cov_82.064720#0
																H	21	150	97.9	+	0	0	55D95M197I	RM2|S2|R106640/1	NODE_1_length_1097_cov_82.064720#0
																H	21	150	97.9	-	0	0	54D96M196I	RM2|S2|R18250640/2	NODE_1_length_1097_cov_82.064720#0
																H	21	150	98	+	0	0	40I150M102I	RM2|S2|R48872908/2	NODE_1_length_1097_cov_82.064720#0
																H	21	150	98	+	0	0	97I150M45I	RM2|S2|R7203692/2	NODE_1_length_1097_cov_82.064720#0
																H	21	150	98	-	0	0	138I150M4I	RM2|S2|R16793406/2	NODE_1_length_1097_cov_82.064720#0
																H	21	150	98	-	0	0	18I150M124I	RM2|S2|R3824675/2	NODE_1_length_1097_cov_82.064720#0
																H	21	150	98.1	+	0	0	189I103M47D	RM2|S2|R4639975/2	NODE_1_length_1097_cov_82.064720#0
																H	21	150	98.3	-	0	0	29D121M171I	RM2|S2|R25770361/1	NODE_1_length_1097_cov_82.064720#0
																H	21	150	98.5	-	0	0	159I133M17D	RM2|S2|R17341127/1	NODE_1_length_1097_cov_82.064720#0
																H	21	150	98.6	+	0	0	151I141M9D	RM2|S2|R6242776/1	NODE_1_length_1097_cov_82.064720#0
																H	21	150	98.7	+	0	0	123I150M19I	RM2|S2|R17315717/1	NODE_1_length_1097_cov_82.064720#0
																H	21	150	98.7	+	0	0	3I150M139I	RM2|S2|R47667626/1	NODE_1_length_1097_cov_82.064720#0
																H	21	150	98.7	+	0	0	89I150M53I	RM2|S2|R8052645/2	NODE_1_length_1097_cov_82.064720#0
																H	21	150	98.7	-	0	0	124I150M18I	RM2|S2|R12984655/1	NODE_1_length_1097_cov_82.064720#0
																H	21	150	98.7	-	0	0	127I150M15I	RM2|S2|R8443908/2	NODE_1_length_1097_cov_82.064720#0
																H	21	150	98.7	-	0	0	135I150M7I	RM2|S2|R36424622/2	NODE_1_length_1097_cov_82.064720#0
																H	21	150	98.7	-	0	0	217I75M75D	RM2|S2|R48397730/2	NODE_1_length_1097_cov_82.064720#0
																H	21	150	98.7	-	0	0	54I150M88I	RM2|S2|R20630939/1	NODE_1_length_1097_cov_82.064720#0
																H	21	150	98.7	-	0	0	78I150M64I	RM2|S2|R30854679/2	NODE_1_length_1097_cov_82.064720#0
																H	21	150	98.7	-	0	0	D149M143I	RM2|S2|R37538998/1	NODE_1_length_1097_cov_82.064720#0
																H	21	150	98.8	-	0	0	207I85M65D	RM2|S2|R7582213/1	NODE_1_length_1097_cov_82.064720#0
																H	21	150	98.9	-	0	0	58D92M200I	RM2|S2|R15775866/1	NODE_1_length_1097_cov_82.064720#0
																H	21	150	98.9	-	0	0	62D88M204I	RM2|S2|R8794221/1	NODE_1_length_1097_cov_82.064720#0
																H	21	150	98.9	-	0	0	63D87M205I	RM2|S2|R22393524/2	NODE_1_length_1097_cov_82.064720#0
																H	21	150	99	+	0	0	193I99M51D	RM2|S2|R24423224/2	NODE_1_length_1097_cov_82.064720#0
																H	21	150	99.1	-	0	0	37D113M179I	RM2|S2|R27421019/1	NODE_1_length_1097_cov_82.064720#0
																H	21	150	99.2	+	0	0	172I120M30D	RM2|S2|R18978084/2	NODE_1_length_1097_cov_82.064720#0
																H	21	150	99.2	-	0	0	20D130M162I	RM2|S2|R46404150/1	NODE_1_length_1097_cov_82.064720#0
																H	21	150	99.3	+	0	0	15D135M157I	RM2|S2|R36424622/1	NODE_1_length_1097_cov_82.064720#0
																H	21	150	99.3	+	0	0	22I150M120I	RM2|S2|R20554500/1	NODE_1_length_1097_cov_82.064720#0
																H	21	150	99.3	+	0	0	22I150M120I	RM2|S2|R37414949/1	NODE_1_length_1097_cov_82.064720#0
																H	21	150	99.3	+	0	0	34I150M108I	RM2|S2|R12984655/2	NODE_1_length_1097_cov_82.064720#0
																H	21	150	99.3	-	0	0	7I150M135I	RM2|S2|R46747109/1	NODE_1_length_1097_cov_82.064720#0
																H	22	150	100	-	0	0	100I150M43I	RM2|S1|R40687399/1	scaffold00064_1#0
																H	22	150	97.3	-	0	0	25I150M118I	RM2|S1|R29343266/1	scaffold00064_1#0
																H	22	150	97.3	-	0	0	34I150M109I	RM2|S2|R5294245/2	scaffold00064_1#0
																H	22	150	97.7	-	0	0	17D133M160I	RM2|S1|R45538175/2	scaffold00064_1#0
																H	22	150	97.8	-	0	0	16D134M159I	RM2|S2|R13817302/2	scaffold00064_1#0
																H	22	150	98	+	0	0	24I150M119I	RM2|S1|R40687399/2	scaffold00064_1#0
																H	22	150	98	-	0	0	62I150M81I	RM2|S1|R41203241/2	scaffold00064_1#0
																H	22	150	98.1	+	0	0	187I106M44D	RM2|S1|R3827562/2	scaffold00064_1#0
																H	22	150	98.1	-	0	0	42D108M185I	RM2|S1|R21615339/1	scaffold00064_1#0
																H	22	150	98.2	+	0	0	179I114M36D	RM2|S2|R48944460/2	scaffold00064_1#0
																H	22	150	98.4	+	0	0	170I123M27D	RM2|S1|R8432466/2	scaffold00064_1#0
																H	22	150	98.5	+	0	0	159I134M16D	RM2|S1|R33643357/1	scaffold00064_1#0
																H	22	150	98.6	+	0	0	146I147M3D	RM2|S2|R25650746/1	scaffold00064_1#0
																H	22	150	98.7	+	0	0	216I77M73D	RM2|S2|R34202036/2	scaffold00064_1#0
																H	22	150	98.7	-	0	0	74I150M69I	RM2|S2|R5233592/2	scaffold00064_1#0
																H	22	150	98.8	+	0	0	211I82M68D	RM2|S2|R39382714/1	scaffold00064_1#0
																H	22	150	98.8	-	0	0	211I82M68D	RM2|S1|R20532227/1	scaffold00064_1#0
																H	22	150	98.8	-	0	0	68D82M211I	RM2|S2|R19119022/2	scaffold00064_1#0
																H	22	150	98.9	+	0	0	206I87M63D	RM2|S1|R17013717/1	scaffold00064_1#0
																H	22	150	99	+	0	0	47D103M190I	RM2|S1|R41203241/1	scaffold00064_1#0
																H	22	150	99.1	+	0	0	177I116M34D	RM2|S1|R38919467/2	scaffold00064_1#0
																H	22	150	99.2	+	0	0	165I128M22D	RM2|S1|R13453038/1	scaffold00064_1#0
																H	22	150	99.3	+	0	0	150I143M7D	RM2|S2|R4849911/1	scaffold00064_1#0
																H	22	150	99.3	-	0	0	114I150M29I	RM2|S1|R37054437/1	scaffold00064_1#0
																H	23	150	100	+	0	0	184I107M43D	RM2|S1|R8469489/2	NODE_3_length_998_cov_71.539078#0
																H	23	150	100	+	0	0	208I83M67D	RM2|S1|R1090783/2	NODE_3_length_998_cov_71.539078#0
																H	23	150	100	+	0	0	51I150M90I	RM2|S1|R6329735/1	NODE_3_length_998_cov_71.539078#0
																H	23	150	97.1	-	0	0	154I137M13D	RM2|S1|R43181133/1	NODE_3_length_998_cov_71.539078#0
																H	23	150	97.2	+	0	0	148I143M7D	RM2|S1|R33163978/2	NODE_3_length_998_cov_71.539078#0
																H	23	150	98	+	0	0	112I150M29I	RM2|S1|R12669192/1	NODE_3_length_998_cov_71.539078#0
																H	23	150	98	+	0	0	117I150M24I	RM2|S1|R23679288/1	NODE_3_length_998_cov_71.539078#0
																H	23	150	98	+	0	0	42I150M99I	RM2|S1|R14787941/2	NODE_3_length_998_cov_71.539078#0
																H	23	150	98	+	0	0	76I150M65I	RM2|S1|R22152542/2	NODE_3_length_998_cov_71.539078#0
																H	23	150	98	+	0	0	8I150M133I	RM2|S1|R7125666/1	NODE_3_length_998_cov_71.539078#0
																H	23	150	98.2	+	0	0	177I114M36D	RM2|S1|R33064696/2	NODE_3_length_998_cov_71.539078#0
																H	23	150	98.2	+	0	0	182I109M41D	RM2|S1|R18329219/2	NODE_3_length_998_cov_71.539078#0
																H	23	150	98.2	-	0	0	178I113M37D	RM2|S1|R22152542/1	NODE_3_length_998_cov_71.539078#0
																H	23	150	98.3	-	0	0	175I116M34D	RM2|S1|R14787941/1	NODE_3_length_998_cov_71.539078#0
																H	23	150	98.5	+	0	0	161I130M20D	RM2|S1|R49891234/1	NODE_3_length_998_cov_71.539078#0
																H	23	150	98.7	+	0	0	41I150M100I	RM2|S1|R41892683/1	NODE_3_length_998_cov_71.539078#0
																H	23	150	98.7	+	0	0	57I150M84I	RM2|S1|R21507661/1	NODE_3_length_998_cov_71.539078#0
																H	23	150	98.7	-	0	0	117I150M24I	RM2|S1|R13243951/2	NODE_3_length_998_cov_71.539078#0
																H	23	150	99	+	0	0	192I99M51D	RM2|S1|R28046615/2	NODE_3_length_998_cov_71.539078#0
																H	23	150	99.3	+	0	0	150M141I	RM2|S1|R13243951/1	NODE_3_length_998_cov_71.539078#0
																H	23	150	99.3	+	0	0	20I150M121I	RM2|S1|R42746441/1	NODE_3_length_998_cov_71.539078#0
																H	23	150	99.3	-	0	0	157I134M16D	RM2|S1|R42746441/2	NODE_3_length_998_cov_71.539078#0
																H	24	150	100	+	0	0	151I141M9D	RM2|S2|R26035084/1	scaffold00082_12#0
																H	24	150	100	+	0	0	186I106M44D	RM2|S2|R34435640/1	scaffold00082_12#0
																H	24	150	100	-	0	0	146I146M4D	RM2|S2|R15432576/1	scaffold00082_12#0
																H	24	150	100	-	0	0	154I138M12D	RM2|S2|R4847704/1	scaffold00082_12#0
																H	24	150	100	-	0	0	53D97M195I	RM2|S2|R28573826/1	scaffold00082_12#0
																H	24	150	100	-	0	0	97I150M45I	RM2|S2|R37196005/1	scaffold00082_12#0
																H	24	150	97.2	+	0	0	6D144M148I	RM2|S2|R49710168/2	scaffold00082_12#0
																H	24	150	97.3	+	0	0	129I150M13I	RM2|S2|R43538540/1	scaffold00082_12#0
																H	24	150	97.3	+	0	0	145I147M3D	RM2|S2|R7497210/2	scaffold00082_12#0
																H	24	150	97.3	-	0	0	96I150M46I	RM2|S2|R49710168/1	scaffold00082_12#0
																H	24	150	97.5	+	0	0	173I119M31D	RM2|S2|R49547485/2	scaffold00082_12#0
																H	24	150	97.5	-	0	0	69D81M211I	RM2|S2|R41505909/1	scaffold00082_12#0
																H	24	150	97.9	+	0	0	147I145M5D	RM2|S2|R24141794/1	scaffold00082_12#0
																H	24	150	98	+	0	0	138I150M4I	RM2|S2|R5395918/1	scaffold00082_12#0
																H	24	150	98	+	0	0	35I150M107I	RM2|S2|R11543615/1	scaffold00082_12#0
																H	24	150	98	-	0	0	124I150M18I	RM2|S2|R11543615/2	scaffold00082_12#0
																H	24	150	98	-	0	0	132I150M10I	RM2|S2|R40709316/1	scaffold00082_12#0
																H	24	150	98	-	0	0	D149M143I	RM2|S2|R34280441/1	scaffold00082_12#0
																H	24	150	98.2	+	0	0	180I112M38D	RM2|S2|R48430435/1	scaffold00082_12#0
																H	24	150	98.6	+	0	0	6D144M148I	RM2|S2|R2837398/1	scaffold00082_12#0
																H	24	150	98.7	+	0	0	101I150M41I	RM2|S2|R41484343/1	scaffold00082_12#0
																H	24	150	98.7	+	0	0	119I150M23I	RM2|S2|R44783108/1	scaffold00082_12#0
																H	24	150	98.7	-	0	0	51I150M91I	RM2|S2|R28223813/2	scaffold00082_12#0
																H	24	150	98.7	-	0	0	71D79M213I	RM2|S2|R27613995/1	scaffold00082_12#0
																H	24	150	98.8	+	0	0	65D85M207I	RM2|S2|R121806/1	scaffold00082_12#0
																H	24	150	98.9	-	0	0	60D90M202I	RM2|S2|R29750304/1	scaffold00082_12#0
																H	24	150	99.1	-	0	0	41D109M183I	RM2|S2|R25726215/1	scaffold00082_12#0
																H	24	150	99.2	+	0	0	160I132M18D	RM2|S2|R23306549/2	scaffold00082_12#0
																H	24	150	99.2	+	0	0	173I119M31D	RM2|S2|R20022871/1	scaffold00082_12#0
																H	24	150	99.3	-	0	0	122I150M20I	RM2|S2|R30102360/1	scaffold00082_12#0
																H	24	150	99.3	-	0	0	69I150M73I	RM2|S2|R919897/1	scaffold00082_12#0
																H	25	150	100	+	0	0	193I99M51D	RM2|S1|R45589153/2	scaffold00080_13#0
																H	25	150	100	+	0	0	205I87M63D	RM2|S2|R4865513/1	scaffold00080_13#0
																H	25	150	100	+	0	0	214I78M72D	RM2|S2|R17214731/1	scaffold00080_13#0
																H	25	150	100	-	0	0	45D105M187I	RM2|S2|R24747150/1	scaffold00080_13#0
																H	25	150	97.1	+	0	0	45D105M187I	RM2|S2|R40613664/1	scaffold00080_13#0
																H	25	150	97.2	+	0	0	9D141M151I	RM2|S2|R36156655/1	scaffold00080_13#0
																H	25	150	97.3	+	0	0	12I150M130I	RM2|S2|R6434227/2	scaffold00080_13#0
																H	25	150	97.3	+	0	0	47I150M95I	RM2|S2|R11036136/1	scaffold00080_13#0
																H	25	150	97.3	+	0	0	6I150M136I	RM2|S2|R12859659/2	scaffold00080_13#0
																H	25	150	97.3	+	0	0	71I150M71I	RM2|S2|R41605332/2	scaffold00080_13#0
																H	25	150	97.3	-	0	0	101I150M41I	RM2|S2|R36156655/2	scaffold00080_13#0
																H	25	150	97.3	-	0	0	112I150M30I	RM2|S1|R14918243/2	scaffold00080_13#0
																H	25	150	97.3	-	0	0	181I111M39D	RM2|S2|R11090719/2	scaffold00080_13#0
																H	25	150	97.3	-	0	0	4I150M138I	RM2|S2|R1660006/1	scaffold00080_13#0
																H	25	150	97.3	-	0	0	85I150M57I	RM2|S2|R471646/2	scaffold00080_13#0
																H	25	150	97.3	-	0	0	95I150M47I	RM2|S2|R40613664/2	scaffold00080_13#0
																H	25	150	97.5	-	0	0	213I79M71D	RM2|S2|R21199347/1	scaffold00080_13#0
																H	25	150	97.5	-	0	0	29D121M171I	RM2|S2|R20787174/2	scaffold00080_13#0
																H	25	150	97.6	-	0	0	207I85M65D	RM2|S2|R3890056/1	scaffold00080_13#0
																H	25	150	97.7	-	0	0	162I130M20D	RM2|S2|R41605332/1	scaffold00080_13#0
																H	25	150	97.8	-	0	0	57D93M199I	RM2|S2|R10746009/2	scaffold00080_13#0
																H	25	150	97.9	+	0	0	5D145M147I	RM2|S2|R471646/1	scaffold00080_13#0
																H	25	150	98	+	0	0	104I150M38I	RM2|S2|R44830992/2	scaffold00080_13#0
																H	25	150	98	+	0	0	104I150M38I	RM2|S2|R8477844/1	scaffold00080_13#0
																H	25	150	98	+	0	0	49D101M191I	RM2|S1|R14918243/1	scaffold00080_13#0
																H	25	150	98	+	0	0	99I150M43I	RM2|S2|R11090719/1	scaffold00080_13#0
																H	25	150	98	-	0	0	122I150M20I	RM2|S2|R11049480/2	scaffold00080_13#0
																H	25	150	98	-	0	0	138I150M4I	RM2|S2|R19344245/1	scaffold00080_13#0
																H	25	150	98	-	0	0	21I150M121I	RM2|S2|R22503270/2	scaffold00080_13#0
																H	25	150	98	-	0	0	48I150M94I	RM2|S2|R14537383/1	scaffold00080_13#0
																H	25	150	98.4	-	0	0	28D122M170I	RM2|S2|R2262871/1	scaffold00080_13#0
																H	25	150	98.5	-	0	0	158I134M16D	RM2|S2|R13729572/2	scaffold00080_13#0
																H	25	150	98.7	+	0	0	130I150M12I	RM2|S2|R25387848/1	scaffold00080_13#0
																H	25	150	98.7	+	0	0	14I150M128I	RM2|S2|R19312246/1	scaffold00080_13#0
																H	25	150	98.7	+	0	0	54I150M88I	RM2|S2|R33051327/1	scaffold00080_13#0
																H	25	150	98.7	+	0	0	79I150M63I	RM2|S2|R13729572/1	scaffold00080_13#0
																H	25	150	98.7	-	0	0	126I150M16I	RM2|S2|R12859659/1	scaffold00080_13#0
																H	25	150	98.7	-	0	0	26I150M116I	RM2|S2|R666296/2	scaffold00080_13#0
																H	25	150	98.7	-	0	0	55I150M87I	RM2|S2|R31377413/1	scaffold00080_13#0
																H	25	150	98.7	-	0	0	77I150M65I	RM2|S2|R16419166/1	scaffold00080_13#0
																H	25	150	98.7	-	0	0	8I150M134I	RM2|S2|R40624216/2	scaffold00080_13#0
																H	25	150	98.8	-	0	0	208I84M66D	RM2|S2|R6458539/1	scaffold00080_13#0
																H	25	150	98.9	+	0	0	198I94M56D	RM2|S2|R6505002/1	scaffold00080_13#0
																H	25	150	98.9	-	0	0	61D89M203I	RM2|S2|R15762977/1	scaffold00080_13#0
																H	25	150	99	+	0	0	48D102M190I	RM2|S2|R23733159/1	scaffold00080_13#0
																H	25	150	99	-	0	0	46D104M188I	RM2|S2|R34119813/1	scaffold00080_13#0
																H	25	150	99.1	-	0	0	184I108M42D	RM2|S2|R6434227/1	scaffold00080_13#0
																H	25	150	99.2	+	0	0	173I119M31D	RM2|S2|R32582699/1	scaffold00080_13#0
																H	25	150	99.2	-	0	0	23D127M165I	RM2|S2|R19965061/1	scaffold00080_13#0
																H	25	150	99.3	+	0	0	157I135M15D	RM2|S1|R16741746/1	scaffold00080_13#0
																H	25	150	99.3	-	0	0	14D136M156I	RM2|S1|R25221404/1	scaffold00080_13#0
																H	25	150	99.3	-	0	0	40I150M102I	RM2|S2|R13985833/2	scaffold00080_13#0
																H	27	150	100	-	0	0	142I150M	RM2|S1|R44697937/1	NODE_2_length_1481_cov_83.598244#0
																H	27	150	100	-	0	0	169I123M27D	RM2|S1|R22618864/2	NODE_2_length_1481_cov_83.598244#0
																H	27	150	100	-	0	0	33D117M175I	RM2|S2|R25576743/1	NODE_2_length_1481_cov_83.598244#0
																H	27	150	97	-	0	0	50D100M192I	RM2|S1|R35018387/2	NODE_2_length_1481_cov_83.598244#0
																H	27	150	97.3	+	0	0	134I150M8I	RM2|S2|R36009507/2	NODE_2_length_1481_cov_83.598244#0
																H	27	150	97.3	+	0	0	25I150M117I	RM2|S1|R3416519/2	NODE_2_length_1481_cov_83.598244#0
																H	27	150	97.3	-	0	0	13I150M129I	RM2|S2|R8074231/1	NODE_2_length_1481_cov_83.598244#0
																H	27	150	97.3	-	0	0	141I150MI	RM2|S2|R43913611/1	NODE_2_length_1481_cov_83.598244#0
																H	27	150	98	+	0	0	53I150M89I	RM2|S1|R44697937/2	NODE_2_length_1481_cov_83.598244#0
																H	27	150	98	+	0	0	55I150M87I	RM2|S2|R25015437/1	NODE_2_length_1481_cov_83.598244#0
																H	27	150	98	+	0	0	66I150M76I	RM2|S2|R8964815/1	NODE_2_length_1481_cov_83.598244#0
																H	27	150	98	-	0	0	118I150M24I	RM2|S2|R8094265/2	NODE_2_length_1481_cov_83.598244#0
																H	27	150	98	-	0	0	56I150M86I	RM2|S2|R26812096/1	NODE_2_length_1481_cov_83.598244#0
																H	27	150	98	-	0	0	72I150M70I	RM2|S1|R3416519/1	NODE_2_length_1481_cov_83.598244#0
																H	27	150	98.2	+	0	0	179I113M37D	RM2|S2|R22274794/1	NODE_2_length_1481_cov_83.598244#0
																H	27	150	98.4	+	0	0	165I127M23D	RM2|S1|R5644601/1	NODE_2_length_1481_cov_83.598244#0
																H	27	150	98.7	+	0	0	25I150M117I	RM2|S1|R22618864/1	NODE_2_length_1481_cov_83.598244#0
																H	27	150	98.7	-	0	0	64I150M78I	RM2|S2|R1772201/1	NODE_2_length_1481_cov_83.598244#0
																H	27	150	99	-	0	0	45D105M187I	RM2|S1|R26927506/1	NODE_2_length_1481_cov_83.598244#0
																H	27	150	99.1	-	0	0	39D111M181I	RM2|S2|R48707016/1	NODE_2_length_1481_cov_83.598244#0
																H	27	150	99.2	+	0	0	169I123M27D	RM2|S2|R6849180/2	NODE_2_length_1481_cov_83.598244#0
																H	27	150	99.2	-	0	0	30D120M172I	RM2|S2|R41620991/2	NODE_2_length_1481_cov_83.598244#0
																H	27	150	99.3	+	0	0	9D141M151I	RM2|S2|R8094265/1	NODE_2_length_1481_cov_83.598244#0
																H	27	150	99.3	-	0	0	17I150M125I	RM2|S1|R6203918/1	NODE_2_length_1481_cov_83.598244#0
																H	28	150	100	+	0	0	149I142M8D	RM2|S2|R37787238/1	NODE_4_length_1108_cov_67.821297#0
																H	28	150	100	+	0	0	151I140M10D	RM2|S2|R13160766/1	NODE_4_length_1108_cov_67.821297#0
																H	28	150	100	+	0	0	159I132M18D	RM2|S2|R16872828/1	NODE_4_length_1108_cov_67.821297#0
																H	28	150	100	+	0	0	168I123M27D	RM2|S1|R45197740/2	NODE_4_length_1108_cov_67.821297#0
																H	28	150	100	+	0	0	187I104M46D	RM2|S2|R11012463/1	NODE_4_length_1108_cov_67.821297#0
																H	28	150	100	+	0	0	195I96M54D	RM2|S2|R961066/2	NODE_4_length_1108_cov_67.821297#0
																H	28	150	100	+	0	0	211I80M70D	RM2|S2|R49822688/1	NODE_4_length_1108_cov_67.821297#0
																H	28	150	100	-	0	0	42I150M99I	RM2|S2|R9570660/1	NODE_4_length_1108_cov_67.821297#0
																H	28	150	100	-	0	0	44D106M185I	RM2|S2|R42403585/2	NODE_4_length_1108_cov_67.821297#0
																H	28	150	100	-	0	0	45D105M186I	RM2|S2|R38617360/1	NODE_4_length_1108_cov_67.821297#0
																H	28	150	100	-	0	0	59D91M200I	RM2|S2|R36941931/1	NODE_4_length_1108_cov_67.821297#0
																H	28	150	100	-	0	0	65I150M76I	RM2|S2|R14816579/1	NODE_4_length_1108_cov_67.821297#0
																H	28	150	100	-	0	0	69D81M210I	RM2|S2|R28526278/1	NODE_4_length_1108_cov_67.821297#0
																H	28	150	97	+	0	0	50D100M191I	RM2|S2|R14816579/2	NODE_4_length_1108_cov_67.821297#0
																H	28	150	97.1	+	0	0	10D140M151I	RM2|S1|R31375995/2	NODE_4_length_1108_cov_67.821297#0
																H	28	150	97.1	+	0	0	186I105M45D	RM2|S2|R8887766/1	NODE_4_length_1108_cov_67.821297#0
																H	28	150	97.1	-	0	0	153I138M12D	RM2|S2|R41559482/2	NODE_4_length_1108_cov_67.821297#0
																H	28	150	97.2	+	0	0	148I143M7D	RM2|S2|R8725198/2	NODE_4_length_1108_cov_67.821297#0
																H	28	150	97.2	+	0	0	42D108M183I	RM2|S2|R19919532/1	NODE_4_length_1108_cov_67.821297#0
																H	28	150	97.3	+	0	0	14I150M127I	RM2|S2|R16473476/2	NODE_4_length_1108_cov_67.821297#0
																H	28	150	97.3	+	0	0	28I150M113I	RM2|S2|R16457967/2	NODE_4_length_1108_cov_67.821297#0
																H	28	150	97.3	-	0	0	101I150M40I	RM2|S2|R29681828/1	NODE_4_length_1108_cov_67.821297#0
																H	28	150	97.3	-	0	0	120I150M21I	RM2|S2|R16473476/1	NODE_4_length_1108_cov_67.821297#0
																H	28	150	97.3	-	0	0	58I150M83I	RM2|S2|R13146065/1	NODE_4_length_1108_cov_67.821297#0
																H	28	150	97.5	+	0	0	32D118M173I	RM2|S1|R7576154/2	NODE_4_length_1108_cov_67.821297#0
																H	28	150	97.7	+	0	0	19D131M160I	RM2|S2|R30423842/1	NODE_4_length_1108_cov_67.821297#0
																H	28	150	97.7	-	0	0	163I128M22D	RM2|S2|R23461485/1	NODE_4_length_1108_cov_67.821297#0
																H	28	150	97.8	+	0	0	153I138M12D	RM2|S2|R13786785/1	NODE_4_length_1108_cov_67.821297#0
																H	28	150	97.8	-	0	0	157I134M16D	RM2|S2|R16457967/1	NODE_4_length_1108_cov_67.821297#0
																H	28	150	97.8	-	0	0	61D89M202I	RM2|S2|R8811535/1	NODE_4_length_1108_cov_67.821297#0
																H	28	150	97.9	-	0	0	4D146M145I	RM2|S1|R5985164/1	NODE_4_length_1108_cov_67.821297#0
																H	28	150	97.9	-	0	0	4D146M145I	RM2|S2|R6217825/1	NODE_4_length_1108_cov_67.821297#0
																H	28	150	97.9	-	0	0	56D94M197I	RM2|S2|R16598679/1	NODE_4_length_1108_cov_67.821297#0
																H	28	150	97.9	-	0	0	5D145M146I	RM2|S2|R25390062/1	NODE_4_length_1108_cov_67.821297#0
																H	28	150	97.9	-	0	0	7D143M148I	RM2|S2|R16129560/1	NODE_4_length_1108_cov_67.821297#0
																H	28	150	98	+	0	0	11I150M130I	RM2|S2|R24332528/2	NODE_4_length_1108_cov_67.821297#0
																H	28	150	98	+	0	0	123I150M18I	RM2|S2|R31954327/1	NODE_4_length_1108_cov_67.821297#0
																H	28	150	98	+	0	0	130I150M11I	RM2|S2|R31050140/1	NODE_4_length_1108_cov_67.821297#0
																H	28	150	98	+	0	0	75I150M66I	RM2|S2|R40869657/2	NODE_4_length_1108_cov_67.821297#0
																H	28	150	98	-	0	0	116I150M25I	RM2|S1|R38016513/1	NODE_4_length_1108_cov_67.821297#0
																H	28	150	98	-	0	0	131I150M10I	RM2|S2|R29319587/1	NODE_4_length_1108_cov_67.821297#0
																H	28	150	98	-	0	0	3I150M138I	RM2|S2|R1282716/1	NODE_4_length_1108_cov_67.821297#0
																H	28	150	98	-	0	0	41I150M100I	RM2|S2|R24752851/1	NODE_4_length_1108_cov_67.821297#0
																H	28	150	98	-	0	0	77I150M64I	RM2|S2|R15060606/2	NODE_4_length_1108_cov_67.821297#0
																H	28	150	98	-	0	0	88I150M53I	RM2|S2|R4551237/1	NODE_4_length_1108_cov_67.821297#0
																H	28	150	98	-	0	0	90I150M51I	RM2|S2|R19919532/2	NODE_4_length_1108_cov_67.821297#0
																H	28	150	98.1	-	0	0	186I105M45D	RM2|S1|R32777239/1	NODE_4_length_1108_cov_67.821297#0
																H	28	150	98.3	+	0	0	175I116M34D	RM2|S2|R48916542/2	NODE_4_length_1108_cov_67.821297#0
																H	28	150	98.4	-	0	0	22D128M163I	RM2|S2|R7972223/1	NODE_4_length_1108_cov_67.821297#0
																H	28	150	98.5	-	0	0	161I130M20D	RM2|S2|R36165189/1	NODE_4_length_1108_cov_67.821297#0
																H	28	150	98.6	+	0	0	148I143M7D	RM2|S2|R6191913/1	NODE_4_length_1108_cov_67.821297#0
																H	28	150	98.6	+	0	0	4D146M145I	RM2|S1|R44353633/1	NODE_4_length_1108_cov_67.821297#0
																H	28	150	98.6	-	0	0	153I138M12D	RM2|S1|R8878699/1	NODE_4_length_1108_cov_67.821297#0
																H	28	150	98.7	+	0	0	113I150M28I	RM2|S2|R6390167/1	NODE_4_length_1108_cov_67.821297#0
																H	28	150	98.7	+	0	0	130I150M11I	RM2|S2|R41250699/1	NODE_4_length_1108_cov_67.821297#0
																H	28	150	98.7	+	0	0	15I150M126I	RM2|S2|R38939017/1	NODE_4_length_1108_cov_67.821297#0
																H	28	150	98.7	+	0	0	16I150M125I	RM2|S2|R8826749/2	NODE_4_length_1108_cov_67.821297#0
																H	28	150	98.7	+	0	0	51I150M90I	RM2|S2|R23461485/2	NODE_4_length_1108_cov_67.821297#0
																H	28	150	98.7	+	0	0	63I150M78I	RM2|S1|R32777239/2	NODE_4_length_1108_cov_67.821297#0
																H	28	150	98.7	+	0	0	72D78M213I	RM2|S2|R26470875/1	NODE_4_length_1108_cov_67.821297#0
																H	28	150	98.7	+	0	0	91I150M50I	RM2|S2|R31821147/1	NODE_4_length_1108_cov_67.821297#0
																H	28	150	98.7	+	0	0	I150M140I	RM2|S2|R41559482/1	NODE_4_length_1108_cov_67.821297#0
																H	28	150	98.7	-	0	0	104I150M37I	RM2|S2|R24332528/1	NODE_4_length_1108_cov_67.821297#0
																H	28	150	98.7	-	0	0	106I150M35I	RM2|S2|R9143578/1	NODE_4_length_1108_cov_67.821297#0
																H	28	150	98.7	-	0	0	78I150M63I	RM2|S1|R7576154/1	NODE_4_length_1108_cov_67.821297#0
																H	28	150	98.7	-	0	0	82I150M59I	RM2|S1|R38824634/1	NODE_4_length_1108_cov_67.821297#0
																H	28	150	98.7	-	0	0	8I150M133I	RM2|S2|R16306099/1	NODE_4_length_1108_cov_67.821297#0
																H	28	150	98.8	-	0	0	209I82M68D	RM2|S2|R44003378/1	NODE_4_length_1108_cov_67.821297#0
																H	28	150	98.9	+	0	0	201I90M60D	RM2|S2|R17308509/2	NODE_4_length_1108_cov_67.821297#0
																H	28	150	98.9	+	0	0	202I89M61D	RM2|S2|R47875666/1	NODE_4_length_1108_cov_67.821297#0
																H	28	150	99	+	0	0	51D99M192I	RM2|S2|R9634043/1	NODE_4_length_1108_cov_67.821297#0
																H	28	150	99	-	0	0	186I105M45D	RM2|S2|R40869657/1	NODE_4_length_1108_cov_67.821297#0
																H	28	150	99	-	0	0	50D100M191I	RM2|S2|R40842371/1	NODE_4_length_1108_cov_67.821297#0
																H	28	150	99.1	+	0	0	185I106M44D	RM2|S2|R43643787/1	NODE_4_length_1108_cov_67.821297#0
																H	28	150	99.2	+	0	0	162I129M21D	RM2|S1|R48738676/1	NODE_4_length_1108_cov_67.821297#0
																H	28	150	99.3	+	0	0	12I150M129I	RM2|S2|R29319587/2	NODE_4_length_1108_cov_67.821297#0
																H	28	150	99.3	+	0	0	139I150M2I	RM2|S2|R10798721/1	NODE_4_length_1108_cov_67.821297#0
																H	28	150	99.3	+	0	0	27I150M114I	RM2|S1|R38016513/2	NODE_4_length_1108_cov_67.821297#0
																H	28	150	99.3	+	0	0	35I150M106I	RM2|S2|R45012521/1	NODE_4_length_1108_cov_67.821297#0
																H	28	150	99.3	+	0	0	60I150M81I	RM2|S2|R36175542/1	NODE_4_length_1108_cov_67.821297#0
																H	28	150	99.3	+	0	0	75I150M66I	RM2|S1|R49583762/1	NODE_4_length_1108_cov_67.821297#0
																H	28	150	99.3	+	0	0	84I150M57I	RM2|S2|R23106550/1	NODE_4_length_1108_cov_67.821297#0
																H	28	150	99.3	-	0	0	125I150M16I	RM2|S1|R44353633/2	NODE_4_length_1108_cov_67.821297#0
																H	28	150	99.3	-	0	0	128I150M13I	RM2|S2|R12109287/2	NODE_4_length_1108_cov_67.821297#0
																H	28	150	99.3	-	0	0	13I150M128I	RM2|S2|R35172462/1	NODE_4_length_1108_cov_67.821297#0
																H	28	150	99.3	-	0	0	22I150M119I	RM2|S2|R35096029/1	NODE_4_length_1108_cov_67.821297#0
																H	28	150	99.3	-	0	0	28I150M113I	RM2|S2|R36352977/1	NODE_4_length_1108_cov_67.821297#0
																H	28	150	99.3	-	0	0	56I150M85I	RM2|S1|R19175748/2	NODE_4_length_1108_cov_67.821297#0
																H	28	150	99.3	-	0	0	59I150M82I	RM2|S2|R39769597/1	NODE_4_length_1108_cov_67.821297#0
																H	28	150	99.3	-	0	0	81I150M60I	RM2|S2|R15425710/1	NODE_4_length_1108_cov_67.821297#0
																H	29	150	100	+	0	0	101I150M40I	RM2|S1|R32892208/1	NODE_2_length_1430_cov_88.053146#0
																H	29	150	100	+	0	0	118I150M23I	RM2|S1|R41574936/1	NODE_2_length_1430_cov_88.053146#0
																H	29	150	100	+	0	0	155I136M14D	RM2|S1|R19993114/1	NODE_2_length_1430_cov_88.053146#0
																H	29	150	100	+	0	0	158I133M17D	RM2|S1|R2020994/1	NODE_2_length_1430_cov_88.053146#0
																H	29	150	100	+	0	0	169I122M28D	RM2|S1|R11868736/1	NODE_2_length_1430_cov_88.053146#0
																H	29	150	100	+	0	0	174I117M33D	RM2|S2|R17636103/1	NODE_2_length_1430_cov_88.053146#0
																H	29	150	100	+	0	0	187I104M46D	RM2|S1|R14945587/1	NODE_2_length_1430_cov_88.053146#0
																H	29	150	100	+	0	0	197I94M56D	RM2|S1|R6011403/2	NODE_2_length_1430_cov_88.053146#0
																H	29	150	100	+	0	0	199I92M58D	RM2|S1|R9633093/1	NODE_2_length_1430_cov_88.053146#0
																H	29	150	100	+	0	0	208I83M67D	RM2|S1|R31446413/1	NODE_2_length_1430_cov_88.053146#0
																H	29	150	100	+	0	0	209I82M68D	RM2|S1|R44952127/1	NODE_2_length_1430_cov_88.053146#0
																H	29	150	100	+	0	0	42D108M183I	RM2|S1|R39697028/1	NODE_2_length_1430_cov_88.053146#0
																H	29	150	100	+	0	0	55I150M86I	RM2|S1|R25514830/2	NODE_2_length_1430_cov_88.053146#0
																H	29	150	100	+	0	0	8D142M149I	RM2|S1|R16397707/1	NODE_2_length_1430_cov_88.053146#0
																H	29	150	100	+	0	0	97I150M44I	RM2|S1|R14902345/1	NODE_2_length_1430_cov_88.053146#0
																H	29	150	100	-	0	0	133I150M8I	RM2|S1|R26494098/1	NODE_2_length_1430_cov_88.053146#0
																H	29	150	100	-	0	0	13D137M154I	RM2|S1|R17741341/1	NODE_2_length_1430_cov_88.053146#0
																H	29	150	100	-	0	0	188I103M47D	RM2|S1|R49401085/1	NODE_2_length_1430_cov_88.053146#0
																H	29	150	100	-	0	0	35D115M176I	RM2|S2|R41051201/1	NODE_2_length_1430_cov_88.053146#0
																H	29	150	100	-	0	0	36D114M177I	RM2|S1|R43632448/1	NODE_2_length_1430_cov_88.053146#0
																H	29	150	100	-	0	0	42D108M183I	RM2|S1|R35536831/1	NODE_2_length_1430_cov_88.053146#0
																H	29	150	100	-	0	0	47D103M188I	RM2|S1|R4231964/2	NODE_2_length_1430_cov_88.053146#0
																H	29	150	100	-	0	0	49D101M190I	RM2|S1|R14180276/2	NODE_2_length_1430_cov_88.053146#0
																H	29	150	100	-	0	0	53D97M194I	RM2|S1|R5808683/2	NODE_2_length_1430_cov_88.053146#0
																H	29	150	100	-	0	0	53I150M88I	RM2|S1|R43536739/1	NODE_2_length_1430_cov_88.053146#0
																H	29	150	100	-	0	0	69D81M210I	RM2|S1|R4663579/1	NODE_2_length_1430_cov_88.053146#0
																H	29	150	100	-	0	0	78I150M63I	RM2|S1|R11808976/1	NODE_2_length_1430_cov_88.053146#0
																H	29	150	97	-	0	0	156I135M15D	RM2|S2|R19066529/1	NODE_2_length_1430_cov_88.053146#0
																H	29	150	97.1	+	0	0	10D140M151I	RM2|S1|R39189723/1	NODE_2_length_1430_cov_88.053146#0
																H	29	150	97.1	+	0	0	48D102M189I	RM2|S1|R42054554/2	NODE_2_length_1430_cov_88.053146#0
																H	29	150	97.1	-	0	0	155I136M14D	RM2|S2|R33749936/1	NODE_2_length_1430_cov_88.053146#0
																H	29	150	97.1	-	0	0	187I104M46D	RM2|S1|R30080892/1	NODE_2_length_1430_cov_88.053146#0
																H	29	150	97.2	+	0	0	150I141M9D	RM2|S1|R43836932/2	NODE_2_length_1430_cov_88.053146#0
																H	29	150	97.2	-	0	0	146I145M5D	RM2|S1|R17355969/1	NODE_2_length_1430_cov_88.053146#0
																H	29	150	97.2	-	0	0	149I142M8D	RM2|S1|R27023702/2	NODE_2_length_1430_cov_88.053146#0
																H	29	150	97.2	-	0	0	43D107M184I	RM2|S1|R13980410/2	NODE_2_length_1430_cov_88.053146#0
																H	29	150	97.2	-	0	0	7D143M148I	RM2|S1|R16578410/2	NODE_2_length_1430_cov_88.053146#0
																H	29	150	97.3	+	0	0	103I150M38I	RM2|S1|R48853336/2	NODE_2_length_1430_cov_88.053146#0
																H	29	150	97.3	+	0	0	10I150M131I	RM2|S1|R11808976/2	NODE_2_length_1430_cov_88.053146#0
																H	29	150	97.3	+	0	0	126I150M15I	RM2|S1|R34707448/2	NODE_2_length_1430_cov_88.053146#0
																H	29	150	97.3	+	0	0	135I150M6I	RM2|S1|R46813852/1	NODE_2_length_1430_cov_88.053146#0
																H	29	150	97.3	+	0	0	20I150M121I	RM2|S1|R31541139/1	NODE_2_length_1430_cov_88.053146#0
																H	29	150	97.3	+	0	0	2I150M139I	RM2|S1|R21284718/2	NODE_2_length_1430_cov_88.053146#0
																H	29	150	97.3	+	0	0	35I150M106I	RM2|S2|R10881666/1	NODE_2_length_1430_cov_88.053146#0
																H	29	150	97.3	+	0	0	37I150M104I	RM2|S1|R45728527/2	NODE_2_length_1430_cov_88.053146#0
																H	29	150	97.3	+	0	0	41I150M100I	RM2|S1|R27023702/1	NODE_2_length_1430_cov_88.053146#0
																H	29	150	97.3	+	0	0	50I150M91I	RM2|S1|R28411007/2	NODE_2_length_1430_cov_88.053146#0
																H	29	150	97.3	+	0	0	64I150M77I	RM2|S1|R4601207/1	NODE_2_length_1430_cov_88.053146#0
																H	29	150	97.3	-	0	0	123I150M18I	RM2|S1|R41161840/1	NODE_2_length_1430_cov_88.053146#0
																H	29	150	97.3	-	0	0	129I150M12I	RM2|S1|R29734986/1	NODE_2_length_1430_cov_88.053146#0
																H	29	150	97.3	-	0	0	131I150M10I	RM2|S1|R43691840/2	NODE_2_length_1430_cov_88.053146#0
																H	29	150	97.3	-	0	0	140I150MI	RM2|S1|R33092068/1	NODE_2_length_1430_cov_88.053146#0
																H	29	150	97.3	-	0	0	17I150M124I	RM2|S2|R22594518/2	NODE_2_length_1430_cov_88.053146#0
																H	29	150	97.3	-	0	0	30I150M111I	RM2|S1|R19290174/2	NODE_2_length_1430_cov_88.053146#0
																H	29	150	97.3	-	0	0	34I150M107I	RM2|S1|R17007154/1	NODE_2_length_1430_cov_88.053146#0
																H	29	150	97.3	-	0	0	4I150M137I	RM2|S1|R3208736/2	NODE_2_length_1430_cov_88.053146#0
																H	29	150	97.3	-	0	0	72I150M69I	RM2|S1|R26294714/1	NODE_2_length_1430_cov_88.053146#0
																H	29	150	97.3	-	0	0	73I150M68I	RM2|S1|R42572179/2	NODE_2_length_1430_cov_88.053146#0
																H	29	150	97.3	-	0	0	74I150M67I	RM2|S1|R41197815/2	NODE_2_length_1430_cov_88.053146#0
																H	29	150	97.3	-	0	0	83I150M58I	RM2|S1|R33062688/1	NODE_2_length_1430_cov_88.053146#0
																H	29	150	97.3	-	0	0	92I150M49I	RM2|S1|R41606198/2	NODE_2_length_1430_cov_88.053146#0
																H	29	150	97.4	-	0	0	176I115M35D	RM2|S2|R10881666/2	NODE_2_length_1430_cov_88.053146#0
																H	29	150	97.5	+	0	0	212I79M71D	RM2|S1|R30925288/1	NODE_2_length_1430_cov_88.053146#0
																H	29	150	97.5	-	0	0	212I79M71D	RM2|S1|R4601207/2	NODE_2_length_1430_cov_88.053146#0
																H	29	150	97.6	+	0	0	27D123M168I	RM2|S2|R36004225/2	NODE_2_length_1430_cov_88.053146#0
																H	29	150	97.6	-	0	0	167I124M26D	RM2|S1|R17705753/1	NODE_2_length_1430_cov_88.053146#0
																H	29	150	97.6	-	0	0	207I84M66D	RM2|S2|R12867806/2	NODE_2_length_1430_cov_88.053146#0
																H	29	150	97.7	+	0	0	205I86M64D	RM2|S1|R20855725/2	NODE_2_length_1430_cov_88.053146#0
																H	29	150	97.7	+	0	0	205I86M64D	RM2|S1|R23175655/2	NODE_2_length_1430_cov_88.053146#0
																H	29	150	97.7	+	0	0	21D129M162I	RM2|S1|R19596301/2	NODE_2_length_1430_cov_88.053146#0
																H	29	150	97.7	-	0	0	62D88M203I	RM2|S1|R27906063/1	NODE_2_length_1430_cov_88.053146#0
																H	29	150	97.8	+	0	0	11D139M152I	RM2|S1|R34465848/1	NODE_2_length_1430_cov_88.053146#0
																H	29	150	97.8	+	0	0	15D135M156I	RM2|S1|R33990906/2	NODE_2_length_1430_cov_88.053146#0
																H	29	150	97.9	+	0	0	5D145M146I	RM2|S1|R41388579/2	NODE_2_length_1430_cov_88.053146#0
																H	29	150	97.9	-	0	0	146I145M5D	RM2|S1|R20274489/1	NODE_2_length_1430_cov_88.053146#0
																H	29	150	97.9	-	0	0	55D95M196I	RM2|S1|R11833159/2	NODE_2_length_1430_cov_88.053146#0
																H	29	150	98	+	0	0	102I150M39I	RM2|S1|R18986627/2	NODE_2_length_1430_cov_88.053146#0
																H	29	150	98	+	0	0	115I150M26I	RM2|S1|R29256745/1	NODE_2_length_1430_cov_88.053146#0
																H	29	150	98	+	0	0	17I150M124I	RM2|S1|R29734986/2	NODE_2_length_1430_cov_88.053146#0
																H	29	150	98	+	0	0	19I150M122I	RM2|S1|R46198747/2	NODE_2_length_1430_cov_88.053146#0
																H	29	150	98	+	0	0	45I150M96I	RM2|S1|R35490762/1	NODE_2_length_1430_cov_88.053146#0
																H	29	150	98	+	0	0	57I150M84I	RM2|S2|R33749936/2	NODE_2_length_1430_cov_88.053146#0
																H	29	150	98	+	0	0	64I150M77I	RM2|S1|R27844503/2	NODE_2_length_1430_cov_88.053146#0
																H	29	150	98	+	0	0	72I150M69I	RM2|S1|R38646322/1	NODE_2_length_1430_cov_88.053146#0
																H	29	150	98	+	0	0	7I150M134I	RM2|S1|R7671695/1	NODE_2_length_1430_cov_88.053146#0
																H	29	150	98	+	0	0	85I150M56I	RM2|S1|R48029395/1	NODE_2_length_1430_cov_88.053146#0
																H	29	150	98	+	0	0	8I150M133I	RM2|S1|R4271672/2	NODE_2_length_1430_cov_88.053146#0
																H	29	150	98	+	0	0	96I150M45I	RM2|S1|R14103368/2	NODE_2_length_1430_cov_88.053146#0
																H	29	150	98	-	0	0	105I150M36I	RM2|S1|R21284718/1	NODE_2_length_1430_cov_88.053146#0
																H	29	150	98	-	0	0	106I150M35I	RM2|S1|R28652812/1	NODE_2_length_1430_cov_88.053146#0
																H	29	150	98	-	0	0	122I150M19I	RM2|S1|R41388579/1	NODE_2_length_1430_cov_88.053146#0
																H	29	150	98	-	0	0	141I150M	RM2|S1|R43038791/1	NODE_2_length_1430_cov_88.053146#0
																H	29	150	98	-	0	0	14I150M127I	RM2|S2|R23885081/1	NODE_2_length_1430_cov_88.053146#0
																H	29	150	98	-	0	0	19I150M122I	RM2|S1|R23564302/1	NODE_2_length_1430_cov_88.053146#0
																H	29	150	98	-	0	0	24I150M117I	RM2|S1|R29512356/1	NODE_2_length_1430_cov_88.053146#0
																H	29	150	98	-	0	0	24I150M117I	RM2|S2|R15222817/1	NODE_2_length_1430_cov_88.053146#0
																H	29	150	98	-	0	0	27I150M114I	RM2|S1|R12394354/2	NODE_2_length_1430_cov_88.053146#0
																H	29	150	98	-	0	0	59I150M82I	RM2|S2|R36004225/1	NODE_2_length_1430_cov_88.053146#0
																H	29	150	98.1	-	0	0	187I104M46D	RM2|S1|R1691241/1	NODE_2_length_1430_cov_88.053146#0
																H	29	150	98.1	-	0	0	44D106M185I	RM2|S1|R7700014/1	NODE_2_length_1430_cov_88.053146#0
																H	29	150	98.2	-	0	0	36D114M177I	RM2|S1|R42980629/1	NODE_2_length_1430_cov_88.053146#0
																H	29	150	98.2	-	0	0	41D109M182I	RM2|S1|R24376126/1	NODE_2_length_1430_cov_88.053146#0
																H	29	150	98.3	+	0	0	172I119M31D	RM2|S1|R40282378/2	NODE_2_length_1430_cov_88.053146#0
																H	29	150	98.4	+	0	0	164I127M23D	RM2|S1|R29118922/1	NODE_2_length_1430_cov_88.053146#0
																H	29	150	98.4	+	0	0	23D127M164I	RM2|S2|R10163367/2	NODE_2_length_1430_cov_88.053146#0
																H	29	150	98.5	+	0	0	155I136M14D	RM2|S1|R10929224/2	NODE_2_length_1430_cov_88.053146#0
																H	29	150	98.5	+	0	0	158I133M17D	RM2|S1|R9545698/1	NODE_2_length_1430_cov_88.053146#0
																H	29	150	98.5	-	0	0	20D130M161I	RM2|S1|R40840634/2	NODE_2_length_1430_cov_88.053146#0
																H	29	150	98.6	+	0	0	151I140M10D	RM2|S1|R25308331/2	NODE_2_length_1430_cov_88.053146#0
																H	29	150	98.6	-	0	0	12D138M153I	RM2|S1|R46625199/1	NODE_2_length_1430_cov_88.053146#0
																H	29	150	98.6	-	0	0	146I145M5D	RM2|S1|R45456126/1	NODE_2_length_1430_cov_88.053146#0
																H	29	150	98.6	-	0	0	153I138M12D	RM2|S1|R1361554/1	NODE_2_length_1430_cov_88.053146#0
																H	29	150	98.6	-	0	0	3D147M144I	RM2|S1|R22629196/1	NODE_2_length_1430_cov_88.053146#0
																H	29	150	98.7	+	0	0	124I150M17I	RM2|S1|R3455185/1	NODE_2_length_1430_cov_88.053146#0
																H	29	150	98.7	+	0	0	129I150M12I	RM2|S1|R3302809/1	NODE_2_length_1430_cov_88.053146#0
																H	29	150	98.7	+	0	0	135I150M6I	RM2|S1|R31810449/1	NODE_2_length_1430_cov_88.053146#0
																H	29	150	98.7	+	0	0	138I150M3I	RM2|S1|R48924769/1	NODE_2_length_1430_cov_88.053146#0
																H	29	150	98.7	+	0	0	20I150M121I	RM2|S1|R43691840/1	NODE_2_length_1430_cov_88.053146#0
																H	29	150	98.7	+	0	0	213I78M72D	RM2|S1|R31414876/2	NODE_2_length_1430_cov_88.053146#0
																H	29	150	98.7	+	0	0	21I150M120I	RM2|S1|R17355969/2	NODE_2_length_1430_cov_88.053146#0
																H	29	150	98.7	+	0	0	57I150M84I	RM2|S1|R17113392/1	NODE_2_length_1430_cov_88.053146#0
																H	29	150	98.7	-	0	0	105I150M36I	RM2|S1|R23852312/1	NODE_2_length_1430_cov_88.053146#0
																H	29	150	98.7	-	0	0	121I150M20I	RM2|S1|R34796160/1	NODE_2_length_1430_cov_88.053146#0
																H	29	150	98.7	-	0	0	132I150M9I	RM2|S1|R4271672/1	NODE_2_length_1430_cov_88.053146#0
																H	29	150	98.7	-	0	0	140I150MI	RM2|S1|R45728527/1	NODE_2_length_1430_cov_88.053146#0
																H	29	150	98.7	-	0	0	19I150M122I	RM2|S1|R7424144/1	NODE_2_length_1430_cov_88.053146#0
																H	29	150	98.7	-	0	0	212I79M71D	RM2|S1|R14103368/1	NODE_2_length_1430_cov_88.053146#0
																H	29	150	98.7	-	0	0	28I150M113I	RM2|S1|R15062242/1	NODE_2_length_1430_cov_88.053146#0
																H	29	150	98.7	-	0	0	46I150M95I	RM2|S1|R8656510/1	NODE_2_length_1430_cov_88.053146#0
																H	29	150	98.7	-	0	0	50I150M91I	RM2|S1|R46808966/1	NODE_2_length_1430_cov_88.053146#0
																H	29	150	98.7	-	0	0	59I150M82I	RM2|S1|R21771211/1	NODE_2_length_1430_cov_88.053146#0
																H	29	150	98.7	-	0	0	74D76M215I	RM2|S1|R24308876/1	NODE_2_length_1430_cov_88.053146#0
																H	29	150	98.7	-	0	0	78I150M63I	RM2|S1|R8138008/1	NODE_2_length_1430_cov_88.053146#0
																H	29	150	98.7	-	0	0	80I150M61I	RM2|S1|R16412592/2	NODE_2_length_1430_cov_88.053146#0
																H	29	150	98.7	-	0	0	87I150M54I	RM2|S1|R8574782/1	NODE_2_length_1430_cov_88.053146#0
																H	29	150	98.7	-	0	0	90I150M51I	RM2|S1|R33990906/1	NODE_2_length_1430_cov_88.053146#0
																H	29	150	98.7	-	0	0	91I150M50I	RM2|S2|R1614776/1	NODE_2_length_1430_cov_88.053146#0
																H	29	150	98.7	-	0	0	9I150M132I	RM2|S1|R22092556/1	NODE_2_length_1430_cov_88.053146#0
																H	29	150	98.8	+	0	0	206I85M65D	RM2|S1|R33779007/1	NODE_2_length_1430_cov_88.053146#0
																H	29	150	98.8	+	0	0	209I82M68D	RM2|S2|R36470540/2	NODE_2_length_1430_cov_88.053146#0
																H	29	150	98.8	+	0	0	64D86M205I	RM2|S2|R22594518/1	NODE_2_length_1430_cov_88.053146#0
																H	29	150	98.8	+	0	0	70D80M211I	RM2|S1|R41606198/1	NODE_2_length_1430_cov_88.053146#0
																H	29	150	98.9	+	0	0	196I95M55D	RM2|S2|R39066834/1	NODE_2_length_1430_cov_88.053146#0
																H	29	150	98.9	+	0	0	197I94M56D	RM2|S1|R4440939/2	NODE_2_length_1430_cov_88.053146#0
																H	29	150	98.9	+	0	0	197I94M56D	RM2|S1|R48006536/2	NODE_2_length_1430_cov_88.053146#0
																H	29	150	98.9	-	0	0	203I88M62D	RM2|S1|R32892208/2	NODE_2_length_1430_cov_88.053146#0
																H	29	150	98.9	-	0	0	204I87M63D	RM2|S1|R28411007/1	NODE_2_length_1430_cov_88.053146#0
																H	29	150	99	-	0	0	192I99M51D	RM2|S1|R14902345/2	NODE_2_length_1430_cov_88.053146#0
																H	29	150	99	-	0	0	45D105M186I	RM2|S1|R35013595/1	NODE_2_length_1430_cov_88.053146#0
																H	29	150	99	-	0	0	46D104M187I	RM2|S1|R33689862/1	NODE_2_length_1430_cov_88.053146#0
																H	29	150	99	-	0	0	51D99M192I	RM2|S1|R37089656/1	NODE_2_length_1430_cov_88.053146#0
																H	29	150	99	-	0	0	52D98M193I	RM2|S1|R44650691/1	NODE_2_length_1430_cov_88.053146#0
																H	29	150	99.1	+	0	0	177I114M36D	RM2|S1|R32252590/1	NODE_2_length_1430_cov_88.053146#0
																H	29	150	99.1	+	0	0	181I110M40D	RM2|S1|R12248236/1	NODE_2_length_1430_cov_88.053146#0
																H	29	150	99.1	+	0	0	39D111M180I	RM2|S1|R16445439/2	NODE_2_length_1430_cov_88.053146#0
																H	29	150	99.1	-	0	0	36D114M177I	RM2|S1|R48713804/2	NODE_2_length_1430_cov_88.053146#0
																H	29	150	99.2	-	0	0	23D127M164I	RM2|S2|R48134952/2	NODE_2_length_1430_cov_88.053146#0
																H	29	150	99.3	+	0	0	149I142M8D	RM2|S1|R6585916/1	NODE_2_length_1430_cov_88.053146#0
																H	29	150	99.3	+	0	0	157I134M16D	RM2|S1|R29941166/1	NODE_2_length_1430_cov_88.053146#0
																H	29	150	99.3	+	0	0	24I150M117I	RM2|S1|R16412592/1	NODE_2_length_1430_cov_88.053146#0
																H	29	150	99.3	+	0	0	45I150M96I	RM2|S1|R8412614/2	NODE_2_length_1430_cov_88.053146#0
																H	29	150	99.3	+	0	0	50I150M91I	RM2|S1|R1691241/2	NODE_2_length_1430_cov_88.053146#0
																H	29	150	99.3	+	0	0	67I150M74I	RM2|S2|R2893308/1	NODE_2_length_1430_cov_88.053146#0
																H	29	150	99.3	+	0	0	82I150M59I	RM2|S1|R42900623/1	NODE_2_length_1430_cov_88.053146#0
																H	29	150	99.3	+	0	0	95I150M46I	RM2|S1|R44653663/1	NODE_2_length_1430_cov_88.053146#0
																H	29	150	99.3	+	0	0	97I150M44I	RM2|S1|R16785670/1	NODE_2_length_1430_cov_88.053146#0
																H	29	150	99.3	-	0	0	21I150M120I	RM2|S1|R25766447/1	NODE_2_length_1430_cov_88.053146#0
																H	29	150	99.3	-	0	0	33I150M108I	RM2|S1|R4973537/1	NODE_2_length_1430_cov_88.053146#0
																H	29	150	99.3	-	0	0	59I150M82I	RM2|S1|R42426075/1	NODE_2_length_1430_cov_88.053146#0
																H	29	150	99.3	-	0	0	80I150M61I	RM2|S1|R42054554/1	NODE_2_length_1430_cov_88.053146#0
																H	3	150	100	+	0	0	157I135M15D	RM2|S1|R29060494/2	scaffold1.1_36#0
																H	3	150	100	+	0	0	193I99M51D	RM2|S1|R16108901/1	scaffold1.1_36#0
																H	3	150	100	+	0	0	212I80M70D	RM2|S1|R37802438/1	scaffold1.1_36#0
																H	3	150	100	+	0	0	215I77M73D	RM2|S1|R17864623/2	scaffold1.1_36#0
																H	3	150	100	+	0	0	23D127M165I	RM2|S2|R15188524/1	scaffold1.1_36#0
																H	3	150	100	+	0	0	40D110M182I	RM2|S2|R13198894/1	scaffold1.1_36#0
																H	3	150	100	-	0	0	183I109M41D	RM2|S1|R39084714/1	scaffold1.1_36#0
																H	3	150	100	-	0	0	58D92M200I	RM2|S1|R23838753/2	scaffold1.1_36#0
																H	3	150	100	-	0	0	91I150M51I	RM2|S1|R4833467/2	scaffold1.1_36#0
																H	3	150	97	-	0	0	192I100M50D	RM2|S2|R11052749/1	scaffold1.1_36#0
																H	3	150	97.1	+	0	0	189I103M47D	RM2|S1|R44017147/1	scaffold1.1_36#0
																H	3	150	97.2	-	0	0	150I142M8D	RM2|S1|R17586056/2	scaffold1.1_36#0
																H	3	150	97.2	-	0	0	5D145M147I	RM2|S1|R27863273/1	scaffold1.1_36#0
																H	3	150	97.3	+	0	0	110I150M32I	RM2|S2|R38301669/1	scaffold1.1_36#0
																H	3	150	97.3	+	0	0	131I150M11I	RM2|S2|R3598104/2	scaffold1.1_36#0
																H	3	150	97.3	+	0	0	138I150M4I	RM2|S1|R22959030/2	scaffold1.1_36#0
																H	3	150	97.3	+	0	0	33I150M109I	RM2|S1|R3316791/2	scaffold1.1_36#0
																H	3	150	97.3	+	0	0	47I150M95I	RM2|S1|R5946810/2	scaffold1.1_36#0
																H	3	150	97.3	+	0	0	72I150M70I	RM2|S1|R29251412/1	scaffold1.1_36#0
																H	3	150	97.3	+	0	0	76I150M66I	RM2|S1|R32828009/2	scaffold1.1_36#0
																H	3	150	97.3	+	0	0	81I150M61I	RM2|S2|R15758813/2	scaffold1.1_36#0
																H	3	150	97.3	-	0	0	106I150M36I	RM2|S1|R34637353/1	scaffold1.1_36#0
																H	3	150	97.3	-	0	0	150M142I	RM2|S1|R1236196/2	scaffold1.1_36#0
																H	3	150	97.3	-	0	0	3I150M139I	RM2|S1|R48858451/2	scaffold1.1_36#0
																H	3	150	97.3	-	0	0	58I150M84I	RM2|S1|R42320076/1	scaffold1.1_36#0
																H	3	150	97.3	-	0	0	5I150M137I	RM2|S1|R40920877/1	scaffold1.1_36#0
																H	3	150	97.3	-	0	0	91I150M51I	RM2|S2|R10613457/2	scaffold1.1_36#0
																H	3	150	97.3	-	0	0	9I150M133I	RM2|S2|R6952117/1	scaffold1.1_36#0
																H	3	150	97.4	+	0	0	36D114M178I	RM2|S1|R34637353/2	scaffold1.1_36#0
																H	3	150	97.5	+	0	0	172I120M30D	RM2|S2|R33209586/1	scaffold1.1_36#0
																H	3	150	97.5	+	0	0	70D80M212I	RM2|S1|R8567443/2	scaffold1.1_36#0
																H	3	150	97.5	-	0	0	29D121M171I	RM2|S1|R28041835/2	scaffold1.1_36#0
																H	3	150	97.6	+	0	0	66D84M208I	RM2|S2|R47951258/1	scaffold1.1_36#0
																H	3	150	97.7	+	0	0	163I129M21D	RM2|S2|R796029/1	scaffold1.1_36#0
																H	3	150	97.7	+	0	0	206I86M64D	RM2|S1|R22295548/1	scaffold1.1_36#0
																H	3	150	97.7	+	0	0	20D130M162I	RM2|S1|R16091648/2	scaffold1.1_36#0
																H	3	150	97.7	+	0	0	21D129M163I	RM2|S2|R10613457/1	scaffold1.1_36#0
																H	3	150	97.7	-	0	0	62D88M204I	RM2|S2|R45805675/2	scaffold1.1_36#0
																H	3	150	97.8	+	0	0	13D137M155I	RM2|S1|R10777362/1	scaffold1.1_36#0
																H	3	150	97.8	+	0	0	154I138M12D	RM2|S1|R32466923/2	scaffold1.1_36#0
																H	3	150	97.8	+	0	0	155I137M13D	RM2|S1|R25070933/1	scaffold1.1_36#0
																H	3	150	97.8	+	0	0	15D135M157I	RM2|S1|R27056391/1	scaffold1.1_36#0
																H	3	150	97.8	-	0	0	12D138M154I	RM2|S1|R37319686/1	scaffold1.1_36#0
																H	3	150	97.9	+	0	0	195I97M53D	RM2|S1|R21756840/2	scaffold1.1_36#0
																H	3	150	98	+	0	0	114I150M28I	RM2|S1|R45867123/1	scaffold1.1_36#0
																H	3	150	98	+	0	0	135I150M7I	RM2|S1|R7211500/1	scaffold1.1_36#0
																H	3	150	98	+	0	0	136I150M6I	RM2|S1|R20496254/1	scaffold1.1_36#0
																H	3	150	98	+	0	0	32I150M110I	RM2|S1|R925480/2	scaffold1.1_36#0
																H	3	150	98	+	0	0	39I150M103I	RM2|S1|R23359060/2	scaffold1.1_36#0
																H	3	150	98	+	0	0	47I150M95I	RM2|S1|R22207590/2	scaffold1.1_36#0
																H	3	150	98	+	0	0	48I150M94I	RM2|S1|R13662084/2	scaffold1.1_36#0
																H	3	150	98	+	0	0	50D100M192I	RM2|S1|R49017055/2	scaffold1.1_36#0
																H	3	150	98	+	0	0	60I150M82I	RM2|S2|R35939066/2	scaffold1.1_36#0
																H	3	150	98	+	0	0	98I150M44I	RM2|S1|R23216762/1	scaffold1.1_36#0
																H	3	150	98	-	0	0	133I150M9I	RM2|S2|R23102811/1	scaffold1.1_36#0
																H	3	150	98	-	0	0	139I150M3I	RM2|S1|R47581643/2	scaffold1.1_36#0
																H	3	150	98	-	0	0	14I150M128I	RM2|S1|R15067054/1	scaffold1.1_36#0
																H	3	150	98	-	0	0	192I100M50D	RM2|S1|R10627991/1	scaffold1.1_36#0
																H	3	150	98	-	0	0	2I150M140I	RM2|S1|R2612050/1	scaffold1.1_36#0
																H	3	150	98	-	0	0	37I150M105I	RM2|S1|R19190103/2	scaffold1.1_36#0
																H	3	150	98	-	0	0	49D101M191I	RM2|S1|R28040952/1	scaffold1.1_36#0
																H	3	150	98	-	0	0	49I150M93I	RM2|S1|R8993202/2	scaffold1.1_36#0
																H	3	150	98	-	0	0	96I150M46I	RM2|S2|R15188524/2	scaffold1.1_36#0
																H	3	150	98	-	0	0	D149M143I	RM2|S1|R43105255/2	scaffold1.1_36#0
																H	3	150	98.1	+	0	0	187I105M45D	RM2|S1|R38946100/2	scaffold1.1_36#0
																H	3	150	98.1	+	0	0	188I104M46D	RM2|S1|R42394259/2	scaffold1.1_36#0
																H	3	150	98.1	+	0	0	44D106M186I	RM2|S2|R12157682/1	scaffold1.1_36#0
																H	3	150	98.1	-	0	0	185I107M43D	RM2|S1|R6668763/2	scaffold1.1_36#0
																H	3	150	98.3	+	0	0	29D121M171I	RM2|S1|R20716817/1	scaffold1.1_36#0
																H	3	150	98.3	+	0	0	34D116M176I	RM2|S1|R27834402/2	scaffold1.1_36#0
																H	3	150	98.3	-	0	0	176I116M34D	RM2|S1|R26238441/2	scaffold1.1_36#0
																H	3	150	98.3	-	0	0	33D117M175I	RM2|S1|R23070252/2	scaffold1.1_36#0
																H	3	150	98.3	-	0	0	35D115M177I	RM2|S1|R24145513/1	scaffold1.1_36#0
																H	3	150	98.4	-	0	0	167I125M25D	RM2|S2|R35939066/1	scaffold1.1_36#0
																H	3	150	98.4	-	0	0	168I124M26D	RM2|S1|R13662084/1	scaffold1.1_36#0
																H	3	150	98.4	-	0	0	26D124M168I	RM2|S1|R24088343/2	scaffold1.1_36#0
																H	3	150	98.5	+	0	0	158I134M16D	RM2|S1|R21893558/1	scaffold1.1_36#0
																H	3	150	98.5	-	0	0	161I131M19D	RM2|S1|R23359060/1	scaffold1.1_36#0
																H	3	150	98.6	-	0	0	9D141M151I	RM2|S1|R45650394/1	scaffold1.1_36#0
																H	3	150	98.6	-	0	0	9D141M151I	RM2|S2|R44580025/2	scaffold1.1_36#0
																H	3	150	98.7	+	0	0	100I150M42I	RM2|S2|R11052749/2	scaffold1.1_36#0
																H	3	150	98.7	+	0	0	105I150M37I	RM2|S1|R10518209/2	scaffold1.1_36#0
																H	3	150	98.7	+	0	0	120I150M22I	RM2|S1|R3982873/1	scaffold1.1_36#0
																H	3	150	98.7	+	0	0	139I150M3I	RM2|S2|R17472072/2	scaffold1.1_36#0
																H	3	150	98.7	+	0	0	140I150M2I	RM2|S1|R8795328/2	scaffold1.1_36#0
																H	3	150	98.7	+	0	0	14I150M128I	RM2|S1|R21455238/1	scaffold1.1_36#0
																H	3	150	98.7	+	0	0	18I150M124I	RM2|S1|R21047878/1	scaffold1.1_36#0
																H	3	150	98.7	+	0	0	36I150M106I	RM2|S1|R17586056/1	scaffold1.1_36#0
																H	3	150	98.7	+	0	0	45I150M97I	RM2|S1|R35409351/2	scaffold1.1_36#0
																H	3	150	98.7	+	0	0	58I150M84I	RM2|S1|R33894468/1	scaffold1.1_36#0
																H	3	150	98.7	+	0	0	5I150M137I	RM2|S1|R47581643/1	scaffold1.1_36#0
																H	3	150	98.7	+	0	0	77I150M65I	RM2|S1|R26238441/1	scaffold1.1_36#0
																H	3	150	98.7	+	0	0	90I150M52I	RM2|S2|R33093442/2	scaffold1.1_36#0
																H	3	150	98.7	-	0	0	126I150M16I	RM2|S1|R3316791/1	scaffold1.1_36#0
																H	3	150	98.7	-	0	0	134I150M8I	RM2|S1|R14901484/1	scaffold1.1_36#0
																H	3	150	98.7	-	0	0	19I150M123I	RM2|S1|R3765430/1	scaffold1.1_36#0
																H	3	150	98.7	-	0	0	215I77M73D	RM2|S1|R8795328/1	scaffold1.1_36#0
																H	3	150	98.7	-	0	0	26I150M116I	RM2|S2|R32081761/2	scaffold1.1_36#0
																H	3	150	98.7	-	0	0	47I150M95I	RM2|S1|R8567443/1	scaffold1.1_36#0
																H	3	150	98.7	-	0	0	74D76M216I	RM2|S1|R31322881/2	scaffold1.1_36#0
																H	3	150	98.7	-	0	0	87I150M55I	RM2|S1|R16091648/1	scaffold1.1_36#0
																H	3	150	98.7	-	0	0	87I150M55I	RM2|S1|R18400610/1	scaffold1.1_36#0
																H	3	150	98.8	-	0	0	64D86M206I	RM2|S2|R15358595/1	scaffold1.1_36#0
																H	3	150	98.8	-	0	0	65D85M207I	RM2|S2|R32208460/1	scaffold1.1_36#0
																H	3	150	98.9	-	0	0	55D95M197I	RM2|S1|R13027446/1	scaffold1.1_36#0
																H	3	150	99	+	0	0	190I102M48D	RM2|S2|R41168665/2	scaffold1.1_36#0
																H	3	150	99	+	0	0	193I99M51D	RM2|S2|R21239049/2	scaffold1.1_36#0
																H	3	150	99	+	0	0	194I98M52D	RM2|S1|R45589062/2	scaffold1.1_36#0
																H	3	150	99	+	0	0	196I96M54D	RM2|S2|R8146812/2	scaffold1.1_36#0
																H	3	150	99	-	0	0	196I96M54D	RM2|S2|R15758813/1	scaffold1.1_36#0
																H	3	150	99.1	+	0	0	176I116M34D	RM2|S1|R12976653/1	scaffold1.1_36#0
																H	3	150	99.1	+	0	0	38D112M180I	RM2|S1|R4833467/1	scaffold1.1_36#0
																H	3	150	99.2	+	0	0	168I124M26D	RM2|S1|R1898210/2	scaffold1.1_36#0
																H	3	150	99.3	+	0	0	120I150M22I	RM2|S1|R2009725/2	scaffold1.1_36#0
																H	3	150	99.3	+	0	0	136I150M6I	RM2|S1|R16823993/1	scaffold1.1_36#0
																H	3	150	99.3	+	0	0	23I150M119I	RM2|S1|R6668763/1	scaffold1.1_36#0
																H	3	150	99.3	+	0	0	68I150M74I	RM2|S2|R36597656/1	scaffold1.1_36#0
																H	3	150	99.3	+	0	0	71I150M71I	RM2|S1|R34120474/1	scaffold1.1_36#0
																H	3	150	99.3	+	0	0	81I150M61I	RM2|S1|R11154090/1	scaffold1.1_36#0
																H	3	150	99.3	+	0	0	94I150M48I	RM2|S1|R44143851/1	scaffold1.1_36#0
																H	3	150	99.3	-	0	0	101I150M41I	RM2|S1|R27056391/2	scaffold1.1_36#0
																H	3	150	99.3	-	0	0	140I150M2I	RM2|S1|R35409351/1	scaffold1.1_36#0
																H	3	150	99.3	-	0	0	66I150M76I	RM2|S1|R11536572/1	scaffold1.1_36#0
																H	3	150	99.3	-	0	0	6I150M136I	RM2|S1|R49017055/1	scaffold1.1_36#0
																H	3	150	99.3	-	0	0	74I150M68I	RM2|S1|R13004371/1	scaffold1.1_36#0
																H	3	150	99.3	-	0	0	75I150M67I	RM2|S2|R44542862/1	scaffold1.1_36#0
																H	3	150	99.3	-	0	0	91I150M51I	RM2|S1|R5260031/2	scaffold1.1_36#0
																H	30	150	100	+	0	0	170I121M29D	RM2|S1|R33346480/2	NODE_2_length_1381_cov_76.975380#0
																H	30	150	100	+	0	0	3D147M144I	RM2|S1|R28954830/1	NODE_2_length_1381_cov_76.975380#0
																H	30	150	100	-	0	0	126I150M15I	RM2|S2|R15761310/1	NODE_2_length_1381_cov_76.975380#0
																H	30	150	97.2	-	0	0	183I108M42D	RM2|S2|R7259329/1	NODE_2_length_1381_cov_76.975380#0
																H	30	150	97.3	+	0	0	45I150M96I	RM2|S1|R33118845/2	NODE_2_length_1381_cov_76.975380#0
																H	30	150	97.3	+	0	0	54I150M87I	RM2|S1|R1013289/1	NODE_2_length_1381_cov_76.975380#0
																H	30	150	97.3	+	0	0	76I150M65I	RM2|S2|R31862371/2	NODE_2_length_1381_cov_76.975380#0
																H	30	150	97.3	+	0	0	85I150M56I	RM2|S2|R7259329/2	NODE_2_length_1381_cov_76.975380#0
																H	30	150	97.3	-	0	0	83I150M58I	RM2|S1|R28954830/2	NODE_2_length_1381_cov_76.975380#0
																H	30	150	97.9	+	0	0	7D143M148I	RM2|S2|R15761310/2	NODE_2_length_1381_cov_76.975380#0
																H	30	150	98	-	0	0	190I101M49D	RM2|S1|R1013289/2	NODE_2_length_1381_cov_76.975380#0
																H	30	150	98	-	0	0	191I100M50D	RM2|S1|R33118845/1	NODE_2_length_1381_cov_76.975380#0
																H	30	150	98.2	-	0	0	178I113M37D	RM2|S1|R8779844/1	NODE_2_length_1381_cov_76.975380#0
																H	30	150	98.4	-	0	0	22D128M163I	RM2|S2|R4515823/2	NODE_2_length_1381_cov_76.975380#0
																H	30	150	98.7	+	0	0	6I150M135I	RM2|S2|R47550871/1	NODE_2_length_1381_cov_76.975380#0
																H	30	150	98.8	+	0	0	210I81M69D	RM2|S1|R7634913/1	NODE_2_length_1381_cov_76.975380#0
																H	30	150	98.8	-	0	0	211I80M70D	RM2|S2|R31862371/1	NODE_2_length_1381_cov_76.975380#0
																H	30	150	99.3	+	0	0	69I150M72I	RM2|S1|R26997988/1	NODE_2_length_1381_cov_76.975380#0
[truncated: 6,851 more rows]

## Sheet: CAMI genomes v4 coverage
Contig v4 region		Coverage	Depth	#=0	# <= 1	Mid depth
scaffold10.1_23#0	Mycobacterium_obuense_strain_47001_(NR_029218.1)	29	12	170	200	0	3	3	3	3	3	3	3	3	3	3	3	3	3	3	3	3	1	1	1	1	1	1	1	1	1	1	1	1	1	1	1	1	1	1	1	0	0	0	0	0	0	0	0
scaffold1.1_33#0	Limnohabitans_parvus_strain_II-B4_(NR_125542.1)	100	60	0	0	31	104	101	103	102	107	105	108	109	111	110	109	114	114	110	107	106	107	106	106	104	101	98	97	98	95	95	92	54	54	32	31	32	32	32	34	35	34	35	34	36	39	40	42
scaffold1.1_32#0	Limnohabitans_parvus_strain_II-B4_(NR_125542.1)	100	60	0	0	31	104	101	103	102	107	105	108	109	111	110	109	114	114	110	107	106	107	106	106	104	101	98	97	98	95	95	92	54	54	32	31	32	32	32	34	35	34	35	34	36	39	40	42
scaffold1.1_36#0	Streptomyces_lunaelactis_strain_MM109_(NR_134822.1)	100	30	0	0	10	127	128	128	127	128	123	120	119	114	121	125	127	123	123	123	120	120	116	116	113	112	113	112	111	113	12	12	12	12	13	12	11	12	12	12	11	10	10	10	10	11	11	12
scaffold2.1_35#0	Cellulomonas_aerilata_strain_5420S-23_(NR_044526.1)	100	87	0	0	48	127	128	128	127	128	123	120	119	114	121	125	127	123	123	123	120	120	116	116	113	112	113	112	111	113	102	104	100	98	108	107	102	107	101	100	94	98	98	59	59	61	66	66
scaffold00026_38#0	Desulfovibrio_bizertensis_strain_MB3_(NR_043808.1)	100	71	0	0	42	48	46	49	52	52	53	52	52	53	57	62	62	60	61	51	49	50	51	51	49	49	50	50	51	51	52	51	50	52	51	50	52	52	52	53	54	56	56	56	59	59	58	58
scaffold00048_4#0	Alysiella_crassa_strain_IAM_14969_(NR_040932.1)	11	9	213	216	0	7	6	5	5	5	5	7	7	7	7	7	7	5	4	0	0	0	0	0	0	0	0	0	0	0	0	0	0	0	0	0	0	0	0	0	0	0	0	0	0	0	0	0
scaffold00025_11#0	Diaphorobacter_oryzae_strain_RF3_(NR_044472.1)	100	36	0	0	4	104	101	103	102	107	105	108	109	111	110	109	114	114	110	107	106	107	106	106	104	101	98	97	98	95	95	92	40	41	41	44	46	45	44	11	11	11	11	12	10	10	10	10
scaffold00001_42#0	Picrophilus_torridus_strain_DSM_9790_(NR_074187.1)	100	17	0	0	10	17	17	17	17	16	16	16	16	19	18	18	19	18	19	19	21	21	20	20	20	18	18	19	19	20	21	20	20	21	21	21	22	20	20	20	20	19	18	18	17	17	18	19
scaffold00020_11#0	Phenylobacterium_zucineum_strain_HLK1_(NR_074119.1)	100	12	0	104	1	4	3	3	3	3	3	3	3	3	3	3	3	3	3	3	3	3	3	3	3	3	3	3	3	3	3	3	3	3	3	3	3	3	3	3	3	3	3	3	3	3	3	3
scaffold00003_27#0	Sphingomonas_aestuarii_strain_K4_(NR_044341.1)	100	86	0	0	59	88	88	85	86	88	84	87	88	87	87	81	80	78	80	83	83	79	78	79	76	70	71	69	71	70	68	70	67	67	65	61	63	64	61	59	59	61	60	62	62	62	61	64
scaffold00006_3#0	Desulfovibrio_alkalitolerans_strain_RT2_(NR_043069.1)	100	26	0	0	14	24	22	26	26	25	26	25	26	26	26	27	27	28	26	25	26	26	28	26	25	27	24	22	22	22	24	22	22	22	21	22	22	21	21	23	25	26	25	27	28	29	30	29
scaffold00012_3#0	Desulfovibrio_alkalitolerans_strain_RT2_(NR_043069.1)	100	26	0	0	14	24	22	26	26	25	26	25	26	26	26	27	27	28	26	25	26	26	28	26	25	27	24	22	22	22	24	22	22	22	21	22	22	21	21	23	25	26	25	27	28	29	30	29
NODE_2_length_1634_cov_86.146881#0	[Eubacterium]_yurii_strain_SM14_(NR_104843.1)	100	3	0	61	1	8	10	10	10	8	9	9	10	10	10	9	10	11	11	10	11	12	12	11	11	11	12	12	12	12	11	11	2	3	3	4	4	3	3	3	3	2	2	2	2	2	2	2
scaffold00001_61#0	Acholeplasma_oculi_strain_19L_(NR_025960.1)	11	1	214	224	0	0	0	0	0	0	0	0	0	0	0	0	0	0	0	0	0	0	0	0	0	0	0	0	0	0	0	0	0	0	0	0	0	0	0	0	0	0	0	0	0	0	0	0
scaffold00001_4#0	Nitrosomonas_europaea_strain_C-31_(NR_040879.1)	96	6	9	46	0	7	6	5	5	5	5	7	7	7	7	7	7	2	1	1	1	1	1	1	2	2	2	2	3	3	3	4	4	4	4	4	4	4	4	4	4	4	4	4	4	4	4	3
NODE_1_length_1627_cov_58.757221#0	Legionella_maceachernii_strain_ATCC_35300_(NR_041790.1)	100	3	0	13	1	8	8	8	8	8	7	7	7	6	6	4	4	3	3	3	4	2	2	2	2	3	3	3	3	3	3	3	3	2	4	4	4	4	4	4	4	4	5	5	5	5	5	4
scaffold00025_13#0	Porphyromonas_crevioricanis_strain_NUM_402_(NR_104834.1)	34	1	159	208	0	2	2	2	2	2	2	2	2	2	2	2	2	2	2	2	2	2	2	2	2	2	2	2	2	2	2	2	2	2	2	2	2	2	2	1	1	1	1	1	1	1	1	1
NODE_2_length_1542_cov_74.731514#0	Clostridium_cochlearium_strain_ATCC_17787_(NR_044717.2)	54	2	111	190	0	5	5	5	4	4	4	4	5	4	4	4	4	1	2	2	2	2	2	2	2	2	1	1	1	1	2	2	2	3	3	3	3	3	3	3	1	1	1	1	1	1	1	1
scaffold00056_13#0	Prevotella_oulorum_strain_WPH_179_(NR_029147.1)	0	0	242	242	0	0	0	0	0	0	0	0	0	0	0	0	0	0	0	0	0	0	0	0	0	0	0	0	0	0	0	0	0	0	0	0	0	0	0	0	0	0	0	0	0	0	0	0
NODE_2_length_1420_cov_67.210564#0	Lutispora_thermophila_strain_EBR46_(NR_041236.1)	54	13	111	190	0	3	2	2	2	2	2	2	2	3	3	4	4	4	3	3	3	3	3	3	3	3	3	3	3	3	1	1	1	2	1	1	1	1	1	1	1	1	1	1	1	1	1	1
NODE_1_length_1097_cov_82.064720#0	Bacillus_coagulans_strain_NBRC_12583_(NR_041523.1)	90	15	24	45	0	17	18	18	19	19	19	18	17	18	20	18	19	19	21	21	22	21	20	20	20	20	22	24	24	23	23	11	11	11	11	10	10	9	9	10	10	10	10	10	10	10	9	9
scaffold00064_1#0	Ferrithrix_thermotolerans_strain_Y005_(NR_042751.1)	14	1	207	242	0	1	1	1	1	1	1	1	1	1	1	1	0	0	0	0	0	0	0	0	0	0	0	0	0	0	0	0	0	0	0	0	0	0	0	0	0	0	0	0	0	0	0	0
NODE_3_length_998_cov_71.539078#0	Caloranaerobacter_azorensis_strain_MV1087_(NR_028919.1)	73	1	63	196	0	1	1	1	1	1	1	1	1	1	1	1	1	1	1	1	1	1	1	1	1	1	1	1	1	1	1	1	1	1	1	1	1	1	1	1	1	1	1	1	1	1	1	1
scaffold00082_12#0	Clostridium_grantii_strain_A1_(NR_026131.1)	94	3	14	44	0	5	5	5	4	4	4	4	5	4	4	4	4	3	3	2	2	2	2	2	2	2	2	2	2	2	2	2	2	2	2	2	3	3	2	1	3	3	3	3	3	3	3	3
scaffold00080_13#0	Butyrivibrio_fibrisolvens_strain_ATCC_19171_(NR_025981.1)	99	6	2	16	0	10	8	9	9	9	10	10	9	9	9	9	9	9	9	9	10	10	9	8	8	7	7	7	7	7	7	7	7	7	7	7	7	8	8	8	8	8	8	8	9	9	10	10
NODE_1_length_1115_cov_77.946190#0	Butyrivibrio_fibrisolvens_strain_ATCC_19171_(NR_025981.1)	99	6	2	16	0	10	8	9	9	9	10	10	9	9	9	9	9	9	9	9	10	10	9	8	8	7	7	7	7	7	7	7	7	7	7	7	7	8	8	8	8	8	8	8	9	9	10	10
NODE_2_length_1481_cov_83.598244#0	Butyrivibrio_hungatei_strain_JK_615_(NR_025525.1)	100	4	0	50	1	10	8	9	9	9	10	10	9	9	9	9	9	9	9	9	10	10	9	1	1	1	1	1	1	2	2	2	2	2	2	2	2	2	2	2	2	3	3	3	3	3	3	3
NODE_4_length_1108_cov_67.821297#0	Tepidibacter_thalassicus_strain_SC_562_(NR_025678.1)	100	12	0	0	5	8	10	10	10	8	9	9	10	10	10	9	10	11	11	10	11	12	12	11	11	11	12	12	12	12	11	11	10	12	11	11	11	11	11	10	11	11	11	11	11	11	11	13
NODE_2_length_1430_cov_88.053146#0	Propionispora_hippei_strain_KS_(NR_036875.1)	100	24	0	0	19	21	21	21	21	20	21	20	20	20	22	22	23	23	22	22	23	23	22	22	24	22	23	22	22	21	21	21	20	20	22	22	22	21	20	19	19	20	21	21	19	19	20	21
NODE_2_length_1381_cov_76.975380#0	Caminicella_sporogenes_strain_AM1114_(NR_025485.1)	100	2	0	66	1	2	2	2	2	2	2	3	3	3	3	3	3	3	3	3	3	3	3	3	2	2	2	2	2	2	2	2	2	2	2	2	2	2	2	2	2	2	2	2	2	2	2	2
scaffold00047_27#0	Tessaracoccus_flavescens_strain_SST-39_(NR_042550.1)	48	2	124	169	0	1	1	1	1	1	1	1	1	1	1	1	1	1	0	0	0	0	0	0	0	0	0	0	0	0	0	0	0	0	0	0	0	0	0	0	0	0	0	0	0	0	0	0
scaffold00127_4#0	Tessaracoccus_flavescens_strain_SST-39_(NR_042550.1)	48	2	124	169	0	1	1	1	1	1	1	1	1	1	1	1	1	1	0	0	0	0	0	0	0	0	0	0	0	0	0	0	0	0	0	0	0	0	0	0	0	0	0	0	0	0	0	0
scaffold00020_50#0	Pseudoxanthobacter_soli_strain_CC4_(NR_044225.1)	63	33	88	96	0	3	3	4	4	4	4	4	4	4	4	4	4	2	2	2	2	2	2	2	2	2	2	2	2	1	1	1	0	0	0	0	0	0	0	0	0	0	0	0	0	0	0	0
scaffold00039_11#0	Kibdelosporangium_aridum_subsp._largum_strain_SKF-AAD-609_(NR_025571.1)	100	16	0	16	1	35	33	33	32	32	32	30	30	29	29	29	30	29	27	27	26	3	3	3	3	3	3	3	3	3	4	4	4	4	5	4	3	3	4	4	4	4	4	4	4	4	5	5
scaffold00006_12#0	Olleya_aquimaris_strain_L-4_(NR_104531.1)	100	91	0	0	72	114	113	111	111	112	110	111	111	111	109	107	106	102	100	99	101	99	98	93	97	100	97	94	97	93	92	89	90	92	92	96	98	97	96	97	101	101	96	94	94	100	101	103
scaffold00008_11#0	Olleya_aquimaris_strain_L-4_(NR_104531.1)	100	91	0	0	72	114	113	111	111	112	110	111	111	111	109	107	106	102	100	99	101	99	98	93	97	100	97	94	97	93	92	89	90	92	92	96	98	97	96	97	101	101	96	94	94	100	101	103
scaffold00011_11#0	Olleya_aquimaris_strain_L-4_(NR_104531.1)	100	91	0	0	72	114	113	111	111	112	110	111	111	111	109	107	106	102	100	99	101	99	98	93	97	100	97	94	97	93	92	89	90	92	92	96	98	97	96	97	101	101	96	94	94	100	101	103
scaffold00003_8#0	Ohtaekwangia_kribbensis_strain_10AO_(NR_117436.1)	83	1	41	196	0	1	1	1	1	3	3	3	3	3	2	3	3	3	3	4	4	4	4	4	4	4	4	4	4	4	4	4	4	4	4	4	4	3	3	3	2	2	2	1	1	1	1	1
scaffold00004_8#0	Ohtaekwangia_kribbensis_strain_10AO_(NR_117436.1)	83	1	41	196	0	1	1	1	1	3	3	3	3	3	2	3	3	3	3	4	4	4	4	4	4	4	4	4	4	4	4	4	4	4	4	4	4	3	3	3	2	2	2	1	1	1	1	1
scaffold00006_8#0	Ohtaekwangia_kribbensis_strain_10AO_(NR_117436.1)	83	1	41	196	0	1	1	1	1	3	3	3	3	3	2	3	3	3	3	4	4	4	4	4	4	4	4	4	4	4	4	4	4	4	4	4	4	3	3	3	2	2	2	1	1	1	1	1
scaffold00001_7#0	Ohtaekwangia_koreensis_strain_3B-2_(NR_117435.1)	70	1	72	115	0	2	3	3	3	3	3	3	2	2	2	2	2	2	2	2	2	2	2	2	2	2	2	2	2	2	2	2	2	2	2	2	2	2	1	1	1	1	1	1	1	1	1	1
scaffold00002_7#0	Ohtaekwangia_koreensis_strain_3B-2_(NR_117435.1)	70	1	72	115	0	2	3	3	3	3	3	3	2	2	2	2	2	2	2	2	2	2	2	2	2	2	2	2	2	2	2	2	2	2	2	2	2	2	1	1	1	1	1	1	1	1	1	1
scaffold00005_7#0	Ohtaekwangia_koreensis_strain_3B-2_(NR_117435.1)	70	1	72	115	0	2	3	3	3	3	3	3	2	2	2	2	2	2	2	2	2	2	2	2	2	2	2	2	2	2	2	2	2	2	2	2	2	2	1	1	1	1	1	1	1	1	1	1
scaffold00020_23#0	Rhodobacter_viridis_strain_JA737_(NR_108854.1)	100	54	0	0	15	52	52	52	53	55	55	56	59	59	61	60	59	56	54	54	51	50	47	48	49	49	48	50	50	243	208	100	17	15	15	17	17	17	17	16	16	16	15	15	17	16	18	18
scaffold00047_20#0	Rhodobaca_barguzinensis_strain_VKM_B-2406_(NR_044285.1)	92	22	18	77	0	52	52	52	53	55	55	56	59	59	61	60	59	56	54	54	2	2	3	3	3	3	3	2	2	2	2	2	2	3	3	3	3	3	4	4	4	4	4	4	4	4	4	4
NODE_1_length_1568_cov_73.441330#0	Rhodobaca_barguzinensis_strain_VKM_B-2406_(NR_044285.1)	92	22	18	77	0	52	52	52	53	55	55	56	59	59	61	60	59	56	54	54	2	2	3	3	3	3	3	2	2	2	2	2	2	3	3	3	3	3	4	4	4	4	4	4	4	4	4	4
scaffold00002_69#0	Ichthyenterobacterium_magnum_strain_Th6_(NR_134750.1)	100	78	0	0	12	114	113	111	111	112	110	111	111	111	109	107	106	102	100	99	101	99	98	93	97	100	97	94	97	93	92	89	90	92	92	96	98	97	96	97	101	101	96	94	94	100	101	103
scaffold00038_3#0	Sphingobacterium_nematocida_strain_M-SX103_(NR_122101.1)	34	1	159	242	0	0	0	0	0	0	0	0	0	0	0	0	0	0	0	0	0	0	0	0	0	0	0	0	0	0	0	0	0	0	0	0	0	0	0	0	0	0	0	1	1	1	1	1
scaffold00098_8#0	Paracoccus_versutus_strain_ATCC_25364_(NR_042713.1)	100	45	0	17	1	52	52	52	53	55	55	56	59	59	61	60	59	56	54	54	51	50	47	48	49	49	48	50	50	243	208	107	1	1	1	1	1	1	1	1	1	1	1	2	2	2	2	2
scaffold00043_25#0	Paracoccus_versutus_strain_ATCC_25364_(NR_042713.1)	100	45	0	17	1	52	52	52	53	55	55	56	59	59	61	60	59	56	54	54	51	50	47	48	49	49	48	50	50	243	208	107	1	1	1	1	1	1	1	1	1	1	1	2	2	2	2	2
scaffold00003_38#0	Halobacterium_salinarum_strain_91-R6_(NR_025555.1)	100	22	0	0	15	21	20	21	22	22	22	22	23	21	22	22	21	20	20	21	22	21	21	21	20	20	20	21	21	21	21	21	22	22	22	21	21	23	22	22	22	22	23	22	21	23	22	24
scaffold00001_23#0	Halobacterium_salinarum_strain_91-R6_(NR_025555.1)	100	22	0	0	15	21	20	21	22	22	22	22	23	21	22	22	21	20	20	21	22	21	21	21	20	20	20	21	21	21	21	21	22	22	22	21	21	23	22	22	22	22	23	22	21	23	22	24
scaffold00007_23#0	Rhodobacter_viridis_strain_JA737_(NR_108854.1)	100	54	0	0	15	52	52	52	53	55	55	56	59	59	61	60	59	56	54	54	51	50	47	48	49	49	48	50	50	243	208	100	17	15	15	17	17	17	17	16	16	16	15	15	17	16	18	18
scaffold00121_0#0	Sinorhizobium_meliloti_strain_LMG_6133_(NR_118988.1)	100	98	0	0	54	210	210	207	203	211	210	213	214	212	215	210	210	205	201	200	206	201	197	197	194	194	194	191	193	243	208	100	68	67	63	64	62	60	62	62	63	63	61	61	60	54	58	56
scaffold00094_3#0	Sinorhizobium_meliloti_strain_LMG_6133_(NR_118988.1)	100	98	0	0	54	210	210	207	203	211	210	213	214	212	215	210	210	205	201	200	206	201	197	197	194	194	194	191	193	243	208	100	68	67	63	64	62	60	62	62	63	63	61	61	60	54	58	56
scaffold00022_25#0	Moorella_thermoautotrophica_strain_JW_701/3_(NR_029144.1)	100	164	0	0	137	185	184	185	188	188	189	185	192	192	188	187	190	185	188	185	183	182	182	183	183	181	181	179	172	173	174	171	174	171	167	163	168	170	166	163	163	165	164	168	169	169	171	168
scaffold00016_14#0	Moorella_thermoautotrophica_strain_JW_701/3_(NR_029144.1)	100	164	0	0	137	185	184	185	188	188	189	185	192	192	188	187	190	185	188	185	183	182	182	183	183	181	181	179	172	173	174	171	174	171	167	163	168	170	166	163	163	165	164	168	169	169	171	168
scaffold00028_0#0	Phaeospirillum_molischianum_strain_DSM_120_(NR_104755.1)	100	31	0	0	9	32	31	30	28	25	25	25	25	25	26	26	26	26	27	28	28	29	29	28	27	27	28	28	30	30	32	33	31	33	31	30	30	28	27	27	27	26	26	26	26	27	27	27
scaffold00032_1#0	Phaeospirillum_molischianum_strain_DSM_120_(NR_104755.1)	100	31	0	0	9	32	31	30	28	25	25	25	25	25	26	26	26	26	27	28	28	29	29	28	27	27	28	28	30	30	32	33	31	33	31	30	30	28	27	27	27	26	26	26	26	27	27	27
scaffold00023_2#0	Phaeospirillum_molischianum_strain_DSM_120_(NR_104755.1)	100	31	0	0	9	32	31	30	28	25	25	25	25	25	26	26	26	26	27	28	28	29	29	28	27	27	28	28	30	30	32	33	31	33	31	30	30	28	27	27	27	26	26	26	26	27	27	27
scaffold00026_45#0	Phaeospirillum_molischianum_strain_DSM_120_(NR_104755.1)	100	31	0	0	9	32	31	30	28	25	25	25	25	25	26	26	26	26	27	28	28	29	29	28	27	27	28	28	30	30	32	33	31	33	31	30	30	28	27	27	27	26	26	26	26	27	27	27
scaffold00064_15#0	Promicromonospora_vindobonensis_strain_V-45_(NR_042146.1)	73	46	65	121	0	127	128	128	127	128	123	120	119	114	121	125	127	123	123	123	120	120	116	116	113	112	113	112	111	113	102	104	100	98	108	107	102	107	101	100	94	98	98	38	34	34	33	34
scaffold00036_25#0	Xanthobacter_autotrophicus_strain_7c_(NR_026308.1)	93	17	16	151	0	2	2	2	2	2	2	2	2	2	2	2	2	2	2	2	1	1	1	1	1	1	1	1	1	1	1	1	1	1	1	1	1	1	1	1	1	1	1	0	0	0	0	1
scaffold7.1_8#0	Mesorhizobium_chacoense_strain_PR5_(NR_025411.1)	65	91	84	111	0	210	210	207	203	211	210	213	214	212	215	210	210	205	201	200	206	201	197	197	194	194	194	191	193	243	208	100	17	0	0	0	0	0	0	0	0	0	0	0	0	0	0	1
scaffold13.1_3#0	Bosea_vaviloviae_strain_Vaf-18_(NR_136423.1)	100	23	0	47	1	16	15	15	17	18	17	17	16	16	17	16	16	17	15	14	13	13	13	15	15	15	15	18	18	16	16	16	17	1	1	1	1	1	1	1	1	1	1	1	1	1	1	1
scaffold1.1_9#0	Rhizobium_daejeonense_strain_L61_(NR_042851.1)	35	117	155	164	0	210	210	207	203	211	210	213	214	212	215	210	210	205	201	200	206	201	197	197	194	194	194	191	193	243	208	100	17	17	17	18	18	18	20	19	18	19	20	20	19	18	19	18
scaffold7.1_6#0	Sphingomonas_starnbergensis_strain_382_(NR_109485.1)	100	44	0	0	8	52	52	52	53	55	55	56	59	59	61	60	59	56	54	54	51	50	47	48	49	49	48	50	50	243	35	33	34	30	29	32	32	33	32	34	23	25	22	21	20	19	18	18
scaffold2.1_39#0	Sanguibacter_marinus_strain_1-19_(NR_042311.1)	100	78	0	0	27	127	128	128	127	128	123	120	119	114	121	125	127	123	123	123	120	120	116	116	113	112	113	112	111	113	102	104	100	98	108	107	102	107	101	100	94	98	98	38	34	34	33	34
scaffold3.1_17#0	Variovorax_boronicumulans_strain_BAM-48_(NR_041588.1)	100	51	0	0	14	104	101	103	102	107	105	108	109	111	110	109	114	114	110	107	106	107	106	106	104	101	98	97	98	95	95	92	54	54	23	23	23	24	25	24	24	22	23	21	18	16	17	18
scaffold2.1_41#0	Variovorax_boronicumulans_strain_BAM-48_(NR_041588.1)	100	51	0	0	14	104	101	103	102	107	105	108	109	111	110	109	114	114	110	107	106	107	106	106	104	101	98	97	98	95	95	92	54	54	23	23	23	24	25	24	24	22	23	21	18	16	17	18
scaffold1.1_38#0	Cellulomonas_aerilata_strain_5420S-23_(NR_044526.1)	100	87	0	0	48	127	128	128	127	128	123	120	119	114	121	125	127	123	123	123	120	120	116	116	113	112	113	112	111	113	102	104	100	98	108	107	102	107	101	100	94	98	98	59	59	61	66	66
scaffold9.1_31#0	Variovorax_paradoxus_strain_13-0-1D_(NR_036930.1)	100	43	0	0	2	104	101	103	102	107	105	108	109	111	110	109	114	114	110	107	106	107	106	106	104	101	98	97	98	95	95	2	2	3	3	3	3	3	3	3	2	2	2	2	2	2	3	3
scaffold9.1_33#0	Sphingomonas_starnbergensis_strain_382_(NR_109485.1)	100	44	0	0	8	52	52	52	53	55	55	56	59	59	61	60	59	56	54	54	51	50	47	48	49	49	48	50	50	243	35	33	34	30	29	32	32	33	32	34	23	25	22	21	20	19	18	18
scaffold1.1_43#0	Massilia_niabensis_strain_5420S-26_(NR_044571.1)	100	33	0	0	13	104	101	103	102	107	105	108	109	111	110	109	114	114	110	107	106	107	106	106	104	101	98	97	98	95	95	92	40	41	41	44	46	45	44	34	33	32	31	30	31	30	30	30
scaffold2.1_5#0	Frondihabitans_australicus_strain_E1HC-02_(NR_043897.1)	100	28	0	0	5	20	21	22	21	20	19	19	19	19	18	18	18	16	16	17	16	15	16	15	14	13	14	14	15	15	13	14	15	14	108	107	102	107	101	100	94	98	98	59	59	61	66	66
scaffold8.1_17#0	Paenibacillus_frigoriresistens_strain_YIM_016_(NR_109546.1)	36	22	153	201	0	2	2	2	2	2	2	2	2	2	2	2	2	1	1	1	1	1	1	1	1	1	1	1	1	1	1	1	1	0	0	0	0	0	0	0	0	0	0	0	0	0	0	0
scaffold1.1_23#0	Phycicoccus_dokdonensis_strain_DS-8_(NR_044286.1)	100	20	0	0	3	35	33	33	32	32	32	30	30	29	29	29	30	29	27	27	26	23	23	23	25	24	24	23	23	22	20	20	19	19	18	19	19	21	19	19	20	22	21	24	7	7	7	6
scaffold1.1_37#0	Cellulomonas_aerilata_strain_5420S-23_(NR_044526.1)	100	87	0	0	48	127	128	128	127	128	123	120	119	114	121	125	127	123	123	123	120	120	116	116	113	112	113	112	111	113	102	104	100	98	108	107	102	107	101	100	94	98	98	59	59	61	66	66
scaffold8.1_9#0	Sphingomonas_starnbergensis_strain_382_(NR_109485.1)	100	44	0	0	8	52	52	52	53	55	55	56	59	59	61	60	59	56	54	54	51	50	47	48	49	49	48	50	50	243	35	33	34	30	29	32	32	33	32	34	23	25	22	21	20	19	18	18
scaffold2.1_11#0	Massilia_niabensis_strain_5420S-26_(NR_044571.1)	100	33	0	0	13	104	101	103	102	107	105	108	109	111	110	109	114	114	110	107	106	107	106	106	104	101	98	97	98	95	95	92	40	41	41	44	46	45	44	34	33	32	31	30	31	30	30	30
scaffold1.1_1#0	Mesorhizobium_caraganae_strain_CCBAU_11299_(NR_044118.1)	100	68	0	0	12	210	210	207	203	211	210	213	214	212	215	210	210	205	201	200	206	201	197	197	194	194	194	191	193	243	208	100	17	17	17	18	18	18	20	19	18	19	20	20	19	18	19	18
scaffold2.1#0	Nocardia_coubleae_strain_OFN_N12_(NR_104567.1)	100	15	0	14	1	3	3	3	3	3	3	3	3	3	3	3	3	3	3	3	3	2	2	2	2	3	4	4	4	4	4	4	4	5	5	5	4	4	4	4	4	4	3	3	3	3	3	3
scaffold1.1_4#0	Knoellia_locipacati_strain_DMZ1_(NR_109064.1)	100	26	0	0	16	35	33	33	32	32	32	30	30	29	29	29	30	29	27	27	26	23	23	23	25	24	24	23	23	22	20	20	19	19	18	19	19	21	19	19	20	22	21	24	18	18	18	17
scaffold1.1_29#0	Aeromicrobium_ponti_strain_HSW-1_(NR_042659.1)	100	26	0	0	12	28	27	26	26	26	27	24	23	23	23	24	23	21	19	20	21	19	20	18	18	17	16	15	14	16	16	18	18	18	16	16	16	16	16	15	14	13	12	12	13	14	15	14
scaffold1.1_44#0	Rhodococcus_yunnanensis_strain_YIM_70056_(NR_043009.1)	100	72	0	0	57	72	73	71	71	73	75	76	78	73	71	69	69	69	69	70	73	73	74	75	76	78	79	78	79	76	73	74	73	70	70	66	64	65	62	60	59	61	64	64	65	66	68	66
scaffold3.1_22#0	Cellulomonas_aerilata_strain_5420S-23_(NR_044526.1)	100	87	0	0	48	127	128	128	127	128	123	120	119	114	121	125	127	123	123	123	120	120	116	116	113	112	113	112	111	113	102	104	100	98	108	107	102	107	101	100	94	98	98	59	59	61	66	66
scaffold1.1_3#0	Chryseobacterium_gregarium_strain_P_461/12_(NR_042647.1)	19	3	196	241	0	1	1	1	1	1	1	1	1	1	1	1	1	1	1	1	1	1	1	1	1	1	1	1	1	1	1	1	1	1	1	1	1	1	1	1	1	1	1	1	1	1	1	1
scaffold2.1_2#0	Cellulomonas_aerilata_strain_5420S-23_(NR_044526.1)	100	87	0	0	48	127	128	128	127	128	123	120	119	114	121	125	127	123	123	123	120	120	116	116	113	112	113	112	111	113	102	104	100	98	108	107	102	107	101	100	94	98	98	59	59	61	66	66
scaffold1.1_21#0	Aeromicrobium_ponti_strain_HSW-1_(NR_042659.1)	100	26	0	0	12	28	27	26	26	26	27	24	23	23	23	24	23	21	19	20	21	19	20	18	18	17	16	15	14	16	16	18	18	18	16	16	16	16	16	15	14	13	12	12	13	14	15	14
scaffold2.1_24#0	Methylophilus_flavus_strain_Ship_(NR_104519.1)	100	7	0	7	1	7	6	5	5	5	5	7	7	7	7	7	7	5	4	4	4	4	4	4	4	4	4	4	4	5	5	5	5	5	5	5	5	5	5	5	5	5	5	5	5	5	5	5
scaffold1.1_14#0	Curtobacterium_flaccumfaciens_strain_LMG_3645_(NR_025467.1)	81	28	45	84	0	20	21	22	21	20	19	19	19	19	18	18	18	16	16	17	16	15	16	15	14	13	14	14	15	15	13	14	15	14	108	107	102	107	101	100	94	98	98	59	59	61	66	66
scaffold1.1_13#0	Sphingomonas_phyllosphaerae_strain_FA2_(NR_029111.1)	100	31	0	0	5	52	52	52	53	55	55	56	59	59	61	60	59	56	54	54	51	50	47	48	49	49	48	50	50	243	35	33	34	30	29	32	32	33	32	34	11	10	9	10	10	10	10	11
scaffold1.1_10#0	Aeromicrobium_ponti_strain_HSW-1_(NR_042659.1)	100	26	0	0	12	28	27	26	26	26	27	24	23	23	23	24	23	21	19	20	21	19	20	18	18	17	16	15	14	16	16	18	18	18	16	16	16	16	16	15	14	13	12	12	13	14	15	14
scaffold5.1_26#0	Pedobacter_ginsenosidimutans_strain_THG-45_(NR_108685.1)	100	4	0	15	1	5	5	5	5	5	5	5	5	4	4	3	3	3	2	2	2	2	2	2	1	2	2	2	2	2	2	2	3	2	2	2	3	4	4	4	4	4	4	4	4	4	3	3
scaffold3.1_26#0	Aureimonas_ureilytica_strain_5715S-12_(NR_043995.1)	100	121	0	0	88	210	210	207	203	211	210	213	214	212	215	210	210	205	201	200	206	201	197	197	194	194	194	191	193	243	208	107	102	103	100	104	104	103	105	107	106	104	104	104	103	104	103	104
scaffold2.1_18#0	Methylophilus_flavus_strain_Ship_(NR_104519.1)	100	7	0	7	1	7	6	5	5	5	5	7	7	7	7	7	7	5	4	4	4	4	4	4	4	4	4	4	4	5	5	5	5	5	5	5	5	5	5	5	5	5	5	5	5	5	5	5
scaffold2.1_16#0	Methylophilus_flavus_strain_Ship_(NR_104519.1)	100	7	0	7	1	7	6	5	5	5	5	7	7	7	7	7	7	5	4	4	4	4	4	4	4	4	4	4	4	5	5	5	5	5	5	5	5	5	5	5	5	5	5	5	5	5	5	5
scaffold4.1_15#0	Bosea_vaviloviae_strain_Vaf-18_(NR_136423.1)	100	26	0	0	13	16	15	15	17	18	17	17	16	16	17	16	16	17	15	14	13	13	13	15	15	15	15	18	18	16	16	16	17	15	15	17	18	17	18	18	18	18	19	17	18	19	17	18
scaffold1.1_19#0	Exiguobacterium_acetylicum_strain_DSM_20416_(NR_043479.1)	100	19	0	0	6	17	18	18	19	19	19	18	17	18	20	18	19	19	21	21	22	21	20	20	20	20	22	24	24	23	23	13	11	11	11	11	12	11	10	10	9	10	10	10	10	10	10	11
scaffold3.1_31#0	Aureimonas_ureilytica_strain_5715S-12_(NR_043995.1)	100	121	0	0	88	210	210	207	203	211	210	213	214	212	215	210	210	205	201	200	206	201	197	197	194	194	194	191	193	243	208	107	102	103	100	104	104	103	105	107	106	104	104	104	103	104	103	104
scaffold1.1_30#0	Streptomyces_lunaelactis_strain_MM109_(NR_134822.1)	100	30	0	0	10	127	128	128	127	128	123	120	119	114	121	125	127	123	123	123	120	120	116	116	113	112	113	112	111	113	12	12	12	12	13	12	11	12	12	12	11	10	10	10	10	11	11	12
scaffold6.1_0#0	Phycicoccus_dokdonensis_strain_DS-8_(NR_044286.1)	100	20	0	0	3	35	33	33	32	32	32	30	30	29	29	29	30	29	27	27	26	23	23	23	25	24	24	23	23	22	20	20	19	19	18	19	19	21	19	19	20	22	21	24	7	7	7	6
scaffold1.1_28#0	Pedobacter_jejuensis_strain_THG-DR3_(NR_133810.1)	84	5	37	59	0	5	5	5	5	5	5	5	5	4	4	3	3	3	2	2	2	2	2	2	1	2	2	2	2	2	2	2	3	1	1	1	1	1	1	1	1	1	1	0	0	0	0	0
scaffold2.1_25#0	Serratia_aquatilis_strain_2015-2462-01_(NR_147771.1)	100	14	0	0	4	48	46	49	52	52	53	52	52	53	57	62	62	60	61	12	12	12	12	11	10	11	12	12	13	12	12	14	14	13	13	13	11	12	12	12	11	11	11	11	11	11	10	10
scaffold1.1_45#0	Sanguibacter_marinus_strain_1-19_(NR_042311.1)	100	78	0	0	27	127	128	128	127	128	123	120	119	114	121	125	127	123	123	123	120	120	116	116	113	112	113	112	111	113	102	104	100	98	108	107	102	107	101	100	94	98	98	38	34	34	33	34
scaffold13.1_29#0	Piscinibacter_aquaticus_strain_IMCC1728_(NR_043921.1)	100	33	0	0	2	104	101	103	102	107	105	108	109	111	110	109	114	114	110	107	106	107	106	106	104	101	98	97	98	95	3	3	4	3	3	3	3	3	3	3	2	2	2	2	2	3	3	4
contig_2_8#0	Exiguobacterium_acetylicum_strain_DSM_20416_(NR_043479.1)	53	8	112	153	0	0	0	0	0	0	0	0	0	0	0	0	0	0	0	0	0	0	0	0	0	0	0	0	0	0	0	0	0	0	0	0	0	0	0	0	0	0	10	10	10	10	10	11
contig_1_4#0	Exiguobacterium_acetylicum_strain_DSM_20416_(NR_043479.1)	100	17	0	13	1	17	18	18	19	19	19	18	17	18	20	18	19	19	21	21	22	21	20	20	20	20	22	24	24	23	23	13	11	11	11	11	12	11	10	10	9	10	10	10	10	10	10	11
[truncated: 200 more columns]

## Sheet: CAMI Genomes synonyms
[Eubacterium]_yurii_strain_SM14_(NR_104843.1)	3	[Eubacterium]_yurii_subsp._margaretiae_strain_ATCC_43715_(NR_115259.1)	[Eubacterium]_yurii_subsp._schtitka_strain_ATCC_43716_(NR_115260.1)
[Eubacterium]_yurii_subsp._margaretiae_strain_ATCC_43715_(NR_115259.1)	3	[Eubacterium]_yurii_strain_SM14_(NR_104843.1)	[Eubacterium]_yurii_subsp._schtitka_strain_ATCC_43716_(NR_115260.1)
[Eubacterium]_yurii_subsp._schtitka_strain_ATCC_43716_(NR_115260.1)	3	[Eubacterium]_yurii_strain_SM14_(NR_104843.1)	[Eubacterium]_yurii_subsp._margaretiae_strain_ATCC_43715_(NR_115259.1)
Acholeplasma_oculi_strain_19L_(NR_025960.1)	1
Acidovorax_facilis_strain_LMG_2193_(NR_116132.1)	3	Acidovorax_radicis_strain_N35_(NR_117776.1)	Limnohabitans_parvus_strain_II-B4_(NR_125542.1)
Acidovorax_radicis_strain_N35_(NR_117776.1)	3	Acidovorax_facilis_strain_LMG_2193_(NR_116132.1)	Limnohabitans_parvus_strain_II-B4_(NR_125542.1)
Aeromicrobium_ponti_strain_HSW-1_(NR_042659.1)	1
Agrobacterium_tumefaciens_strain_IAM_12048_(NR_041396.1)	7	Agrobacterium_tumefaciens_strain_NCPPB2437_(NR_115516.1)	Beijerinckia_fluminensis_strain_UQM_1685_(NR_116306.1)	Rhizobium_daejeonense_strain_L61_(NR_042851.1)	Rhizobium_daejeonense_strain_NBRC_102495_(NR_114121.1)	Rhizobium_naphthalenivorans_strain_TSY03b_(NR_132669.1)	Rhizobium_nepotum_strain_39/7_(NR_117203.1)
Agrobacterium_tumefaciens_strain_NCPPB2437_(NR_115516.1)	7	Agrobacterium_tumefaciens_strain_IAM_12048_(NR_041396.1)	Beijerinckia_fluminensis_strain_UQM_1685_(NR_116306.1)	Rhizobium_daejeonense_strain_L61_(NR_042851.1)	Rhizobium_daejeonense_strain_NBRC_102495_(NR_114121.1)	Rhizobium_naphthalenivorans_strain_TSY03b_(NR_132669.1)	Rhizobium_nepotum_strain_39/7_(NR_117203.1)
Alysiella_crassa_strain_IAM_14969_(NR_040932.1)	4	Alysiella_crassa_strain_NBRC_102455_(NR_114099.1)	Alysiella_filiformis_strain_A1_(NR_028844.1)	Alysiella_filiformis_strain_NBRC_102454_(NR_114098.1)
Alysiella_crassa_strain_NBRC_102455_(NR_114099.1)	4	Alysiella_crassa_strain_IAM_14969_(NR_040932.1)	Alysiella_filiformis_strain_A1_(NR_028844.1)	Alysiella_filiformis_strain_NBRC_102454_(NR_114098.1)
Alysiella_filiformis_strain_A1_(NR_028844.1)	4	Alysiella_crassa_strain_IAM_14969_(NR_040932.1)	Alysiella_crassa_strain_NBRC_102455_(NR_114099.1)	Alysiella_filiformis_strain_NBRC_102454_(NR_114098.1)
Alysiella_filiformis_strain_NBRC_102454_(NR_114098.1)	4	Alysiella_crassa_strain_IAM_14969_(NR_040932.1)	Alysiella_crassa_strain_NBRC_102455_(NR_114099.1)	Alysiella_filiformis_strain_A1_(NR_028844.1)
Aureimonas_ureilytica_strain_5715S-12_(NR_043995.1)	1
Bacillus_badius_strain_ATCC_14574_(NR_115577.1)	4	Bacillus_coagulans_strain_ATCC_7050_(NR_115727.1)	Bacillus_coagulans_strain_JCM_2257_(NR_115580.1)	Bacillus_coagulans_strain_NBRC_12583_(NR_041523.1)
Bacillus_coagulans_strain_ATCC_7050_(NR_115727.1)	4	Bacillus_badius_strain_ATCC_14574_(NR_115577.1)	Bacillus_coagulans_strain_JCM_2257_(NR_115580.1)	Bacillus_coagulans_strain_NBRC_12583_(NR_041523.1)
Bacillus_coagulans_strain_JCM_2257_(NR_115580.1)	4	Bacillus_badius_strain_ATCC_14574_(NR_115577.1)	Bacillus_coagulans_strain_ATCC_7050_(NR_115727.1)	Bacillus_coagulans_strain_NBRC_12583_(NR_041523.1)
Bacillus_coagulans_strain_NBRC_12583_(NR_041523.1)	4	Bacillus_badius_strain_ATCC_14574_(NR_115577.1)	Bacillus_coagulans_strain_ATCC_7050_(NR_115727.1)	Bacillus_coagulans_strain_JCM_2257_(NR_115580.1)
Beijerinckia_fluminensis_strain_UQM_1685_(NR_116306.1)	7	Agrobacterium_tumefaciens_strain_IAM_12048_(NR_041396.1)	Agrobacterium_tumefaciens_strain_NCPPB2437_(NR_115516.1)	Rhizobium_daejeonense_strain_L61_(NR_042851.1)	Rhizobium_daejeonense_strain_NBRC_102495_(NR_114121.1)	Rhizobium_naphthalenivorans_strain_TSY03b_(NR_132669.1)	Rhizobium_nepotum_strain_39/7_(NR_117203.1)
Bosea_eneae_strain_34614_(NR_028798.1)	6	Bosea_lathyri_strain_R-46060_(NR_108515.1)	Bosea_lupini_strain_R-45681_(NR_108514.1)	Bosea_massiliensis_strain_63287_(NR_025118.1)	Bosea_vaviloviae_strain_Vaf-18_(NR_136423.1)	Bosea_vestrisii_strain_34635_(NR_028799.1)
Bosea_lathyri_strain_R-46060_(NR_108515.1)	6	Bosea_eneae_strain_34614_(NR_028798.1)	Bosea_lupini_strain_R-45681_(NR_108514.1)	Bosea_massiliensis_strain_63287_(NR_025118.1)	Bosea_vaviloviae_strain_Vaf-18_(NR_136423.1)	Bosea_vestrisii_strain_34635_(NR_028799.1)
Bosea_lupini_strain_R-45681_(NR_108514.1)	6	Bosea_eneae_strain_34614_(NR_028798.1)	Bosea_lathyri_strain_R-46060_(NR_108515.1)	Bosea_massiliensis_strain_63287_(NR_025118.1)	Bosea_vaviloviae_strain_Vaf-18_(NR_136423.1)	Bosea_vestrisii_strain_34635_(NR_028799.1)
Bosea_massiliensis_strain_63287_(NR_025118.1)	6	Bosea_eneae_strain_34614_(NR_028798.1)	Bosea_lathyri_strain_R-46060_(NR_108515.1)	Bosea_lupini_strain_R-45681_(NR_108514.1)	Bosea_vaviloviae_strain_Vaf-18_(NR_136423.1)	Bosea_vestrisii_strain_34635_(NR_028799.1)
Bosea_vaviloviae_strain_Vaf-18_(NR_136423.1)	6	Bosea_eneae_strain_34614_(NR_028798.1)	Bosea_lathyri_strain_R-46060_(NR_108515.1)	Bosea_lupini_strain_R-45681_(NR_108514.1)	Bosea_massiliensis_strain_63287_(NR_025118.1)	Bosea_vestrisii_strain_34635_(NR_028799.1)
Bosea_vestrisii_strain_34635_(NR_028799.1)	6	Bosea_eneae_strain_34614_(NR_028798.1)	Bosea_lathyri_strain_R-46060_(NR_108515.1)	Bosea_lupini_strain_R-45681_(NR_108514.1)	Bosea_massiliensis_strain_63287_(NR_025118.1)	Bosea_vaviloviae_strain_Vaf-18_(NR_136423.1)
Butyrivibrio_fibrisolvens_strain_ATCC_19171_(NR_025981.1)	1
Butyrivibrio_hungatei_strain_JK_615_(NR_025525.1)	1
Caloranaerobacter_azorensis_strain_MV1087_(NR_028919.1)	1
Caminicella_sporogenes_strain_AM1114_(NR_025485.1)	1
Catellibacterium_nectariphilum_strain_AST4_(NR_112202.1)	4	Catellibacterium_nectariphilum_strain_NBRC_100046_(NR_113876.1)	Rhodobacter_capsulatus_strain_KC2137_(NR_115744.1)	Rhodobacter_viridis_strain_JA737_(NR_108854.1)
Catellibacterium_nectariphilum_strain_NBRC_100046_(NR_113876.1)	4	Catellibacterium_nectariphilum_strain_AST4_(NR_112202.1)	Rhodobacter_capsulatus_strain_KC2137_(NR_115744.1)	Rhodobacter_viridis_strain_JA737_(NR_108854.1)
Cellulomonas_aerilata_strain_5420S-23_(NR_044526.1)	5	Cellulomonas_humilata_strain_ATCC_25174_(NR_026226.1)	Cellulomonas_soli_strain_Kc1_(NR_113283.1)	Cellulomonas_terrae_strain_DB5_(NR_043257.1)	Cellulomonas_xylanilytica_strain_XIL11_(NR_029095.1)
Cellulomonas_humilata_strain_ATCC_25174_(NR_026226.1)	5	Cellulomonas_aerilata_strain_5420S-23_(NR_044526.1)	Cellulomonas_soli_strain_Kc1_(NR_113283.1)	Cellulomonas_terrae_strain_DB5_(NR_043257.1)	Cellulomonas_xylanilytica_strain_XIL11_(NR_029095.1)
Cellulomonas_soli_strain_Kc1_(NR_113283.1)	5	Cellulomonas_aerilata_strain_5420S-23_(NR_044526.1)	Cellulomonas_humilata_strain_ATCC_25174_(NR_026226.1)	Cellulomonas_terrae_strain_DB5_(NR_043257.1)	Cellulomonas_xylanilytica_strain_XIL11_(NR_029095.1)
Cellulomonas_terrae_strain_DB5_(NR_043257.1)	5	Cellulomonas_aerilata_strain_5420S-23_(NR_044526.1)	Cellulomonas_humilata_strain_ATCC_25174_(NR_026226.1)	Cellulomonas_soli_strain_Kc1_(NR_113283.1)	Cellulomonas_xylanilytica_strain_XIL11_(NR_029095.1)
Cellulomonas_xylanilytica_strain_XIL11_(NR_029095.1)	5	Cellulomonas_aerilata_strain_5420S-23_(NR_044526.1)	Cellulomonas_humilata_strain_ATCC_25174_(NR_026226.1)	Cellulomonas_soli_strain_Kc1_(NR_113283.1)	Cellulomonas_terrae_strain_DB5_(NR_043257.1)
Chryseobacterium_gregarium_strain_P_461/12_(NR_042647.1)	1
Clostridium_cochlearium_strain_ATCC_17787_(NR_044717.2)	2	Clostridium_cochlearium_strain_JCM_1396_(NR_113026.1)
Clostridium_cochlearium_strain_JCM_1396_(NR_113026.1)	2	Clostridium_cochlearium_strain_ATCC_17787_(NR_044717.2)
Clostridium_grantii_strain_A1_(NR_026131.1)	1
Comamonas_granuli_strain_Ko03_(NR_112533.1)	3	Comamonas_granuli_strain_NBRC_101663_(NR_114013.1)	Diaphorobacter_oryzae_strain_RF3_(NR_044472.1)
Comamonas_granuli_strain_NBRC_101663_(NR_114013.1)	3	Comamonas_granuli_strain_Ko03_(NR_112533.1)	Diaphorobacter_oryzae_strain_RF3_(NR_044472.1)
Curtobacterium_flaccumfaciens_strain_LMG_3645_(NR_025467.1)	3	Curtobacterium_herbarum_strain_DSM_14013_(NR_115036.1)	Curtobacterium_herbarum_strain_P_420/07_(NR_025461.1)
Curtobacterium_herbarum_strain_DSM_14013_(NR_115036.1)	3	Curtobacterium_flaccumfaciens_strain_LMG_3645_(NR_025467.1)	Curtobacterium_herbarum_strain_P_420/07_(NR_025461.1)
Curtobacterium_herbarum_strain_P_420/07_(NR_025461.1)	3	Curtobacterium_flaccumfaciens_strain_LMG_3645_(NR_025467.1)	Curtobacterium_herbarum_strain_DSM_14013_(NR_115036.1)
Desulfovibrio_alkalitolerans_strain_RT2_(NR_043069.1)	1
Desulfovibrio_bizertensis_strain_MB3_(NR_043808.1)	1
Diaphorobacter_oryzae_strain_RF3_(NR_044472.1)	3	Comamonas_granuli_strain_Ko03_(NR_112533.1)	Comamonas_granuli_strain_NBRC_101663_(NR_114013.1)
Ewingella_americana_strain_CIP_81.94_(NR_104925.1)	17	Hafnia_paralvei_strain_ATCC_29927_(NR_116898.1)	Hafnia_psychrotolerans_strain_DJC1-1_(NR_134741.1)	Nissabacter_archeti_strain_2134_(NR_147393.1)	Rahnella_bruchi_strain_FRB_226_(NR_146845.1)	Rahnella_genomosp._1_strain_CIP_105588_(NR_146849.1)	Rahnella_inusitata_strain_DSM_30078_(NR_146846.1)	Rahnella_victoriana_strain_FRB_225_(NR_146847.1)	Rahnella_woolbedingensis_strain_FRB_227_(NR_146848.1)	Rouxiella_chamberiensis_(NR_135871.1)	Serratia_aquatilis_strain_2015-2462-01_(NR_147771.1)	Serratia_fonticola_strain_DSM_4576_(NR_025339.1)	Serratia_fonticola_strain_LMG_7882_(NR_114577.1)	Serratia_fonticola_strain_NBRC_102597_(NR_114156.1)	Serratia_glossinae_strain_C1_(NR_116808.1)	Yersinia_entomophaga_strain_MH-1_(NR_115759.1)	Yersinia_nurmii_strain_APN3a-c_(NR_116782.1)
Exiguobacterium_acetylicum_strain_DSM_20416_(NR_043479.1)	4	Exiguobacterium_acetylicum_strain_IFO12146_(NR_115570.1)	Exiguobacterium_acetylicum_strain_NBRC_12146_(NR_113585.1)	Exiguobacterium_indicum_strain_HHS_31_(NR_042347.1)
Exiguobacterium_acetylicum_strain_IFO12146_(NR_115570.1)	4	Exiguobacterium_acetylicum_strain_DSM_20416_(NR_043479.1)	Exiguobacterium_acetylicum_strain_NBRC_12146_(NR_113585.1)	Exiguobacterium_indicum_strain_HHS_31_(NR_042347.1)
Exiguobacterium_acetylicum_strain_NBRC_12146_(NR_113585.1)	4	Exiguobacterium_acetylicum_strain_DSM_20416_(NR_043479.1)	Exiguobacterium_acetylicum_strain_IFO12146_(NR_115570.1)	Exiguobacterium_indicum_strain_HHS_31_(NR_042347.1)
Exiguobacterium_indicum_strain_HHS_31_(NR_042347.1)	4	Exiguobacterium_acetylicum_strain_DSM_20416_(NR_043479.1)	Exiguobacterium_acetylicum_strain_IFO12146_(NR_115570.1)	Exiguobacterium_acetylicum_strain_NBRC_12146_(NR_113585.1)
Ferrithrix_thermotolerans_strain_Y005_(NR_042751.1)	1
Formosa_spongicola_strain_A2_(NR_116612.1)	3	Ichthyenterobacterium_magnum_strain_Th6_(NR_134750.1)	Olleya_namhaensis_strain_WT-MY15_(NR_109551.1)
Frigoribacterium_faeni_strain_801_(NR_026511.1)	7	Frigoribacterium_faeni_strain_DSM_10309_(NR_115033.1)	Frondihabitans_australicus_strain_E1HC-02_(NR_043897.1)	Frondihabitans_peucedani_strain_RS-15_(NR_116933.1)	Microterricola_viridarii_strain_KV-677_(NR_041548.1)	Phycicola_gilvus_strain_SSWW-21_(NR_042536.1)	Phycicola_gilvus_strain_SSWW-21_(NR_115867.1)
Frigoribacterium_faeni_strain_DSM_10309_(NR_115033.1)	7	Frigoribacterium_faeni_strain_801_(NR_026511.1)	Frondihabitans_australicus_strain_E1HC-02_(NR_043897.1)	Frondihabitans_peucedani_strain_RS-15_(NR_116933.1)	Microterricola_viridarii_strain_KV-677_(NR_041548.1)	Phycicola_gilvus_strain_SSWW-21_(NR_042536.1)	Phycicola_gilvus_strain_SSWW-21_(NR_115867.1)
Frondihabitans_australicus_strain_E1HC-02_(NR_043897.1)	7	Frigoribacterium_faeni_strain_801_(NR_026511.1)	Frigoribacterium_faeni_strain_DSM_10309_(NR_115033.1)	Frondihabitans_peucedani_strain_RS-15_(NR_116933.1)	Microterricola_viridarii_strain_KV-677_(NR_041548.1)	Phycicola_gilvus_strain_SSWW-21_(NR_042536.1)	Phycicola_gilvus_strain_SSWW-21_(NR_115867.1)
Frondihabitans_peucedani_strain_RS-15_(NR_116933.1)	7	Frigoribacterium_faeni_strain_801_(NR_026511.1)	Frigoribacterium_faeni_strain_DSM_10309_(NR_115033.1)	Frondihabitans_australicus_strain_E1HC-02_(NR_043897.1)	Microterricola_viridarii_strain_KV-677_(NR_041548.1)	Phycicola_gilvus_strain_SSWW-21_(NR_042536.1)	Phycicola_gilvus_strain_SSWW-21_(NR_115867.1)
Hafnia_paralvei_strain_ATCC_29927_(NR_116898.1)	17	Ewingella_americana_strain_CIP_81.94_(NR_104925.1)	Hafnia_psychrotolerans_strain_DJC1-1_(NR_134741.1)	Nissabacter_archeti_strain_2134_(NR_147393.1)	Rahnella_bruchi_strain_FRB_226_(NR_146845.1)	Rahnella_genomosp._1_strain_CIP_105588_(NR_146849.1)	Rahnella_inusitata_strain_DSM_30078_(NR_146846.1)	Rahnella_victoriana_strain_FRB_225_(NR_146847.1)	Rahnella_woolbedingensis_strain_FRB_227_(NR_146848.1)	Rouxiella_chamberiensis_(NR_135871.1)	Serratia_aquatilis_strain_2015-2462-01_(NR_147771.1)	Serratia_fonticola_strain_DSM_4576_(NR_025339.1)	Serratia_fonticola_strain_LMG_7882_(NR_114577.1)	Serratia_fonticola_strain_NBRC_102597_(NR_114156.1)	Serratia_glossinae_strain_C1_(NR_116808.1)	Yersinia_entomophaga_strain_MH-1_(NR_115759.1)	Yersinia_nurmii_strain_APN3a-c_(NR_116782.1)
Hafnia_psychrotolerans_strain_DJC1-1_(NR_134741.1)	17	Ewingella_americana_strain_CIP_81.94_(NR_104925.1)	Hafnia_paralvei_strain_ATCC_29927_(NR_116898.1)	Nissabacter_archeti_strain_2134_(NR_147393.1)	Rahnella_bruchi_strain_FRB_226_(NR_146845.1)	Rahnella_genomosp._1_strain_CIP_105588_(NR_146849.1)	Rahnella_inusitata_strain_DSM_30078_(NR_146846.1)	Rahnella_victoriana_strain_FRB_225_(NR_146847.1)	Rahnella_woolbedingensis_strain_FRB_227_(NR_146848.1)	Rouxiella_chamberiensis_(NR_135871.1)	Serratia_aquatilis_strain_2015-2462-01_(NR_147771.1)	Serratia_fonticola_strain_DSM_4576_(NR_025339.1)	Serratia_fonticola_strain_LMG_7882_(NR_114577.1)	Serratia_fonticola_strain_NBRC_102597_(NR_114156.1)	Serratia_glossinae_strain_C1_(NR_116808.1)	Yersinia_entomophaga_strain_MH-1_(NR_115759.1)	Yersinia_nurmii_strain_APN3a-c_(NR_116782.1)
Halobacterium_piscisalsi_strain_JCM_14661_(NR_113057.1)	4	Halobacterium_piscisalsi_strain_JCM_14661_(NR_113427.1)	Halobacterium_salinarum_strain_91-R6_(NR_025555.1)	Halobacterium_salinarum_strain_JCM_8978_(NR_113428.1)
Halobacterium_piscisalsi_strain_JCM_14661_(NR_113427.1)	4	Halobacterium_piscisalsi_strain_JCM_14661_(NR_113057.1)	Halobacterium_salinarum_strain_91-R6_(NR_025555.1)	Halobacterium_salinarum_strain_JCM_8978_(NR_113428.1)
Halobacterium_salinarum_strain_91-R6_(NR_025555.1)	4	Halobacterium_piscisalsi_strain_JCM_14661_(NR_113057.1)	Halobacterium_piscisalsi_strain_JCM_14661_(NR_113427.1)	Halobacterium_salinarum_strain_JCM_8978_(NR_113428.1)
Halobacterium_salinarum_strain_JCM_8978_(NR_113428.1)	4	Halobacterium_piscisalsi_strain_JCM_14661_(NR_113057.1)	Halobacterium_piscisalsi_strain_JCM_14661_(NR_113427.1)	Halobacterium_salinarum_strain_91-R6_(NR_025555.1)
Ichthyenterobacterium_magnum_strain_Th6_(NR_134750.1)	3	Formosa_spongicola_strain_A2_(NR_116612.1)	Olleya_namhaensis_strain_WT-MY15_(NR_109551.1)
Janibacter_anophelis_strain_H2.16B_(NR_043218.1)	10	Janibacter_hoylei_strain_PVAS-1_(NR_104794.1)	Janibacter_limosus_strain_DSM_11140_(NR_026362.1)	Janibacter_melonis_strain_CM2104_(NR_025805.1)	Knoellia_locipacati_strain_DMZ1_(NR_109064.1)	Knoellia_sinensis_strain_HKI_0119_(NR_028931.1)	Knoellia_subterranea_strain_HKI_0120_(NR_028932.1)	Phycicoccus_badiiscoriae_strain_Sco-B23_(NR_108472.1)	Phycicoccus_ochangensis_strain_L1b-b9_(NR_132688.1)	Tetrasphaera_remsis_strain_3-M5-R-4_(NR_104693.1)
Janibacter_hoylei_strain_PVAS-1_(NR_104794.1)	10	Janibacter_anophelis_strain_H2.16B_(NR_043218.1)	Janibacter_limosus_strain_DSM_11140_(NR_026362.1)	Janibacter_melonis_strain_CM2104_(NR_025805.1)	Knoellia_locipacati_strain_DMZ1_(NR_109064.1)	Knoellia_sinensis_strain_HKI_0119_(NR_028931.1)	Knoellia_subterranea_strain_HKI_0120_(NR_028932.1)	Phycicoccus_badiiscoriae_strain_Sco-B23_(NR_108472.1)	Phycicoccus_ochangensis_strain_L1b-b9_(NR_132688.1)	Tetrasphaera_remsis_strain_3-M5-R-4_(NR_104693.1)
Janibacter_limosus_strain_DSM_11140_(NR_026362.1)	10	Janibacter_anophelis_strain_H2.16B_(NR_043218.1)	Janibacter_hoylei_strain_PVAS-1_(NR_104794.1)	Janibacter_melonis_strain_CM2104_(NR_025805.1)	Knoellia_locipacati_strain_DMZ1_(NR_109064.1)	Knoellia_sinensis_strain_HKI_0119_(NR_028931.1)	Knoellia_subterranea_strain_HKI_0120_(NR_028932.1)	Phycicoccus_badiiscoriae_strain_Sco-B23_(NR_108472.1)	Phycicoccus_ochangensis_strain_L1b-b9_(NR_132688.1)	Tetrasphaera_remsis_strain_3-M5-R-4_(NR_104693.1)
Janibacter_melonis_strain_CM2104_(NR_025805.1)	10	Janibacter_anophelis_strain_H2.16B_(NR_043218.1)	Janibacter_hoylei_strain_PVAS-1_(NR_104794.1)	Janibacter_limosus_strain_DSM_11140_(NR_026362.1)	Knoellia_locipacati_strain_DMZ1_(NR_109064.1)	Knoellia_sinensis_strain_HKI_0119_(NR_028931.1)	Knoellia_subterranea_strain_HKI_0120_(NR_028932.1)	Phycicoccus_badiiscoriae_strain_Sco-B23_(NR_108472.1)	Phycicoccus_ochangensis_strain_L1b-b9_(NR_132688.1)	Tetrasphaera_remsis_strain_3-M5-R-4_(NR_104693.1)
Kibdelosporangium_aridum_strain_DSM_43828_(NR_025464.1)	3	Kibdelosporangium_aridum_subsp._largum_strain_SKF-AAD-609_(NR_025571.1)	Kibdelosporangium_phytohabitans_strain_KLBMP_1111_(NR_117800.1)
Kibdelosporangium_aridum_subsp._largum_strain_SKF-AAD-609_(NR_025571.1)	3	Kibdelosporangium_aridum_strain_DSM_43828_(NR_025464.1)	Kibdelosporangium_phytohabitans_strain_KLBMP_1111_(NR_117800.1)
Kibdelosporangium_phytohabitans_strain_KLBMP_1111_(NR_117800.1)	3	Kibdelosporangium_aridum_strain_DSM_43828_(NR_025464.1)	Kibdelosporangium_aridum_subsp._largum_strain_SKF-AAD-609_(NR_025571.1)
Knoellia_locipacati_strain_DMZ1_(NR_109064.1)	10	Janibacter_anophelis_strain_H2.16B_(NR_043218.1)	Janibacter_hoylei_strain_PVAS-1_(NR_104794.1)	Janibacter_limosus_strain_DSM_11140_(NR_026362.1)	Janibacter_melonis_strain_CM2104_(NR_025805.1)	Knoellia_sinensis_strain_HKI_0119_(NR_028931.1)	Knoellia_subterranea_strain_HKI_0120_(NR_028932.1)	Phycicoccus_badiiscoriae_strain_Sco-B23_(NR_108472.1)	Phycicoccus_ochangensis_strain_L1b-b9_(NR_132688.1)	Tetrasphaera_remsis_strain_3-M5-R-4_(NR_104693.1)
Knoellia_sinensis_strain_HKI_0119_(NR_028931.1)	10	Janibacter_anophelis_strain_H2.16B_(NR_043218.1)	Janibacter_hoylei_strain_PVAS-1_(NR_104794.1)	Janibacter_limosus_strain_DSM_11140_(NR_026362.1)	Janibacter_melonis_strain_CM2104_(NR_025805.1)	Knoellia_locipacati_strain_DMZ1_(NR_109064.1)	Knoellia_subterranea_strain_HKI_0120_(NR_028932.1)	Phycicoccus_badiiscoriae_strain_Sco-B23_(NR_108472.1)	Phycicoccus_ochangensis_strain_L1b-b9_(NR_132688.1)	Tetrasphaera_remsis_strain_3-M5-R-4_(NR_104693.1)
Knoellia_subterranea_strain_HKI_0120_(NR_028932.1)	10	Janibacter_anophelis_strain_H2.16B_(NR_043218.1)	Janibacter_hoylei_strain_PVAS-1_(NR_104794.1)	Janibacter_limosus_strain_DSM_11140_(NR_026362.1)	Janibacter_melonis_strain_CM2104_(NR_025805.1)	Knoellia_locipacati_strain_DMZ1_(NR_109064.1)	Knoellia_sinensis_strain_HKI_0119_(NR_028931.1)	Phycicoccus_badiiscoriae_strain_Sco-B23_(NR_108472.1)	Phycicoccus_ochangensis_strain_L1b-b9_(NR_132688.1)	Tetrasphaera_remsis_strain_3-M5-R-4_(NR_104693.1)
Legionella_maceachernii_strain_ATCC_35300_(NR_041790.1)	1
Limnohabitans_parvus_strain_II-B4_(NR_125542.1)	3	Acidovorax_facilis_strain_LMG_2193_(NR_116132.1)	Acidovorax_radicis_strain_N35_(NR_117776.1)
Lutispora_thermophila_strain_EBR46_(NR_041236.1)	1
Massilia_alkalitolerans_strain_YIM_31775_(NR_043094.1)	6	Massilia_brevitalea_strain_byr23-80_(NR_044274.1)	Massilia_jejuensis_strain_5317J-18_(NR_116871.1)	Massilia_niabensis_strain_5420S-26_(NR_044571.1)	Massilia_suwonensis_strain_5414S-25_(NR_116872.1)	Massilia_varians_strain_CCUG_35299_(NR_042652.1)
Massilia_brevitalea_strain_byr23-80_(NR_044274.1)	6	Massilia_alkalitolerans_strain_YIM_31775_(NR_043094.1)	Massilia_jejuensis_strain_5317J-18_(NR_116871.1)	Massilia_niabensis_strain_5420S-26_(NR_044571.1)	Massilia_suwonensis_strain_5414S-25_(NR_116872.1)	Massilia_varians_strain_CCUG_35299_(NR_042652.1)
Massilia_jejuensis_strain_5317J-18_(NR_116871.1)	6	Massilia_alkalitolerans_strain_YIM_31775_(NR_043094.1)	Massilia_brevitalea_strain_byr23-80_(NR_044274.1)	Massilia_niabensis_strain_5420S-26_(NR_044571.1)	Massilia_suwonensis_strain_5414S-25_(NR_116872.1)	Massilia_varians_strain_CCUG_35299_(NR_042652.1)
Massilia_niabensis_strain_5420S-26_(NR_044571.1)	6	Massilia_alkalitolerans_strain_YIM_31775_(NR_043094.1)	Massilia_brevitalea_strain_byr23-80_(NR_044274.1)	Massilia_jejuensis_strain_5317J-18_(NR_116871.1)	Massilia_suwonensis_strain_5414S-25_(NR_116872.1)	Massilia_varians_strain_CCUG_35299_(NR_042652.1)
Massilia_suwonensis_strain_5414S-25_(NR_116872.1)	6	Massilia_alkalitolerans_strain_YIM_31775_(NR_043094.1)	Massilia_brevitalea_strain_byr23-80_(NR_044274.1)	Massilia_jejuensis_strain_5317J-18_(NR_116871.1)	Massilia_niabensis_strain_5420S-26_(NR_044571.1)	Massilia_varians_strain_CCUG_35299_(NR_042652.1)
Massilia_varians_strain_CCUG_35299_(NR_042652.1)	6	Massilia_alkalitolerans_strain_YIM_31775_(NR_043094.1)	Massilia_brevitalea_strain_byr23-80_(NR_044274.1)	Massilia_jejuensis_strain_5317J-18_(NR_116871.1)	Massilia_niabensis_strain_5420S-26_(NR_044571.1)	Massilia_suwonensis_strain_5414S-25_(NR_116872.1)
Mesorhizobium_caraganae_strain_CCBAU_11299_(NR_044118.1)	11	Mesorhizobium_gobiense_strain_CCBAU_83330_(NR_044052.1)	Mesorhizobium_mediterraneum_strain_LMG_17148_(NR_042483.1)	Mesorhizobium_mediterraneum_strain_NBRC_102497_(NR_114123.1)	Mesorhizobium_metallidurans_strain_STM_2683_(NR_042685.1)	Mesorhizobium_robiniae_strain_CCNWYC_115_(NR_116467.1)	Mesorhizobium_tamadayense_strain_Ala-3_(NR_115048.1)	Mesorhizobium_tarimense_strain_CCBAU_83306_(NR_044051.1)	Mesorhizobium_temperatum_strain_SDW_018_(NR_025253.1)	Mesorhizobium_tianshanense_strain_A-1BS_(NR_024880.1)	Mesorhizobium_tianshanense_strain_NBRC_102499_(NR_114125.1)
Mesorhizobium_chacoense_strain_PR5_(NR_025411.1)	1
Mesorhizobium_gobiense_strain_CCBAU_83330_(NR_044052.1)	11	Mesorhizobium_caraganae_strain_CCBAU_11299_(NR_044118.1)	Mesorhizobium_mediterraneum_strain_LMG_17148_(NR_042483.1)	Mesorhizobium_mediterraneum_strain_NBRC_102497_(NR_114123.1)	Mesorhizobium_metallidurans_strain_STM_2683_(NR_042685.1)	Mesorhizobium_robiniae_strain_CCNWYC_115_(NR_116467.1)	Mesorhizobium_tamadayense_strain_Ala-3_(NR_115048.1)	Mesorhizobium_tarimense_strain_CCBAU_83306_(NR_044051.1)	Mesorhizobium_temperatum_strain_SDW_018_(NR_025253.1)	Mesorhizobium_tianshanense_strain_A-1BS_(NR_024880.1)	Mesorhizobium_tianshanense_strain_NBRC_102499_(NR_114125.1)
Mesorhizobium_mediterraneum_strain_LMG_17148_(NR_042483.1)	11	Mesorhizobium_caraganae_strain_CCBAU_11299_(NR_044118.1)	Mesorhizobium_gobiense_strain_CCBAU_83330_(NR_044052.1)	Mesorhizobium_mediterraneum_strain_NBRC_102497_(NR_114123.1)	Mesorhizobium_metallidurans_strain_STM_2683_(NR_042685.1)	Mesorhizobium_robiniae_strain_CCNWYC_115_(NR_116467.1)	Mesorhizobium_tamadayense_strain_Ala-3_(NR_115048.1)	Mesorhizobium_tarimense_strain_CCBAU_83306_(NR_044051.1)	Mesorhizobium_temperatum_strain_SDW_018_(NR_025253.1)	Mesorhizobium_tianshanense_strain_A-1BS_(NR_024880.1)	Mesorhizobium_tianshanense_strain_NBRC_102499_(NR_114125.1)
Mesorhizobium_mediterraneum_strain_NBRC_102497_(NR_114123.1)	11	Mesorhizobium_caraganae_strain_CCBAU_11299_(NR_044118.1)	Mesorhizobium_gobiense_strain_CCBAU_83330_(NR_044052.1)	Mesorhizobium_mediterraneum_strain_LMG_17148_(NR_042483.1)	Mesorhizobium_metallidurans_strain_STM_2683_(NR_042685.1)	Mesorhizobium_robiniae_strain_CCNWYC_115_(NR_116467.1)	Mesorhizobium_tamadayense_strain_Ala-3_(NR_115048.1)	Mesorhizobium_tarimense_strain_CCBAU_83306_(NR_044051.1)	Mesorhizobium_temperatum_strain_SDW_018_(NR_025253.1)	Mesorhizobium_tianshanense_strain_A-1BS_(NR_024880.1)	Mesorhizobium_tianshanense_strain_NBRC_102499_(NR_114125.1)
Mesorhizobium_metallidurans_strain_STM_2683_(NR_042685.1)	11	Mesorhizobium_caraganae_strain_CCBAU_11299_(NR_044118.1)	Mesorhizobium_gobiense_strain_CCBAU_83330_(NR_044052.1)	Mesorhizobium_mediterraneum_strain_LMG_17148_(NR_042483.1)	Mesorhizobium_mediterraneum_strain_NBRC_102497_(NR_114123.1)	Mesorhizobium_robiniae_strain_CCNWYC_115_(NR_116467.1)	Mesorhizobium_tamadayense_strain_Ala-3_(NR_115048.1)	Mesorhizobium_tarimense_strain_CCBAU_83306_(NR_044051.1)	Mesorhizobium_temperatum_strain_SDW_018_(NR_025253.1)	Mesorhizobium_tianshanense_strain_A-1BS_(NR_024880.1)	Mesorhizobium_tianshanense_strain_NBRC_102499_(NR_114125.1)
Mesorhizobium_robiniae_strain_CCNWYC_115_(NR_116467.1)	11	Mesorhizobium_caraganae_strain_CCBAU_11299_(NR_044118.1)	Mesorhizobium_gobiense_strain_CCBAU_83330_(NR_044052.1)	Mesorhizobium_mediterraneum_strain_LMG_17148_(NR_042483.1)	Mesorhizobium_mediterraneum_strain_NBRC_102497_(NR_114123.1)	Mesorhizobium_metallidurans_strain_STM_2683_(NR_042685.1)	Mesorhizobium_tamadayense_strain_Ala-3_(NR_115048.1)	Mesorhizobium_tarimense_strain_CCBAU_83306_(NR_044051.1)	Mesorhizobium_temperatum_strain_SDW_018_(NR_025253.1)	Mesorhizobium_tianshanense_strain_A-1BS_(NR_024880.1)	Mesorhizobium_tianshanense_strain_NBRC_102499_(NR_114125.1)
Mesorhizobium_tamadayense_strain_Ala-3_(NR_115048.1)	11	Mesorhizobium_caraganae_strain_CCBAU_11299_(NR_044118.1)	Mesorhizobium_gobiense_strain_CCBAU_83330_(NR_044052.1)	Mesorhizobium_mediterraneum_strain_LMG_17148_(NR_042483.1)	Mesorhizobium_mediterraneum_strain_NBRC_102497_(NR_114123.1)	Mesorhizobium_metallidurans_strain_STM_2683_(NR_042685.1)	Mesorhizobium_robiniae_strain_CCNWYC_115_(NR_116467.1)	Mesorhizobium_tarimense_strain_CCBAU_83306_(NR_044051.1)	Mesorhizobium_temperatum_strain_SDW_018_(NR_025253.1)	Mesorhizobium_tianshanense_strain_A-1BS_(NR_024880.1)	Mesorhizobium_tianshanense_strain_NBRC_102499_(NR_114125.1)
Mesorhizobium_tarimense_strain_CCBAU_83306_(NR_044051.1)	11	Mesorhizobium_caraganae_strain_CCBAU_11299_(NR_044118.1)	Mesorhizobium_gobiense_strain_CCBAU_83330_(NR_044052.1)	Mesorhizobium_mediterraneum_strain_LMG_17148_(NR_042483.1)	Mesorhizobium_mediterraneum_strain_NBRC_102497_(NR_114123.1)	Mesorhizobium_metallidurans_strain_STM_2683_(NR_042685.1)	Mesorhizobium_robiniae_strain_CCNWYC_115_(NR_116467.1)	Mesorhizobium_tamadayense_strain_Ala-3_(NR_115048.1)	Mesorhizobium_temperatum_strain_SDW_018_(NR_025253.1)	Mesorhizobium_tianshanense_strain_A-1BS_(NR_024880.1)	Mesorhizobium_tianshanense_strain_NBRC_102499_(NR_114125.1)
Mesorhizobium_temperatum_strain_SDW_018_(NR_025253.1)	11	Mesorhizobium_caraganae_strain_CCBAU_11299_(NR_044118.1)	Mesorhizobium_gobiense_strain_CCBAU_83330_(NR_044052.1)	Mesorhizobium_mediterraneum_strain_LMG_17148_(NR_042483.1)	Mesorhizobium_mediterraneum_strain_NBRC_102497_(NR_114123.1)	Mesorhizobium_metallidurans_strain_STM_2683_(NR_042685.1)	Mesorhizobium_robiniae_strain_CCNWYC_115_(NR_116467.1)	Mesorhizobium_tamadayense_strain_Ala-3_(NR_115048.1)	Mesorhizobium_tarimense_strain_CCBAU_83306_(NR_044051.1)	Mesorhizobium_tianshanense_strain_A-1BS_(NR_024880.1)	Mesorhizobium_tianshanense_strain_NBRC_102499_(NR_114125.1)
Mesorhizobium_tianshanense_strain_A-1BS_(NR_024880.1)	11	Mesorhizobium_caraganae_strain_CCBAU_11299_(NR_044118.1)	Mesorhizobium_gobiense_strain_CCBAU_83330_(NR_044052.1)	Mesorhizobium_mediterraneum_strain_LMG_17148_(NR_042483.1)	Mesorhizobium_mediterraneum_strain_NBRC_102497_(NR_114123.1)	Mesorhizobium_metallidurans_strain_STM_2683_(NR_042685.1)	Mesorhizobium_robiniae_strain_CCNWYC_115_(NR_116467.1)	Mesorhizobium_tamadayense_strain_Ala-3_(NR_115048.1)	Mesorhizobium_tarimense_strain_CCBAU_83306_(NR_044051.1)	Mesorhizobium_temperatum_strain_SDW_018_(NR_025253.1)	Mesorhizobium_tianshanense_strain_NBRC_102499_(NR_114125.1)
Mesorhizobium_tianshanense_strain_NBRC_102499_(NR_114125.1)	11	Mesorhizobium_caraganae_strain_CCBAU_11299_(NR_044118.1)	Mesorhizobium_gobiense_strain_CCBAU_83330_(NR_044052.1)	Mesorhizobium_mediterraneum_strain_LMG_17148_(NR_042483.1)	Mesorhizobium_mediterraneum_strain_NBRC_102497_(NR_114123.1)	Mesorhizobium_metallidurans_strain_STM_2683_(NR_042685.1)	Mesorhizobium_robiniae_strain_CCNWYC_115_(NR_116467.1)	Mesorhizobium_tamadayense_strain_Ala-3_(NR_115048.1)	Mesorhizobium_tarimense_strain_CCBAU_83306_(NR_044051.1)	Mesorhizobium_temperatum_strain_SDW_018_(NR_025253.1)	Mesorhizobium_tianshanense_strain_A-1BS_(NR_024880.1)
Methylibium_petroleiphilum_strain_PM1_(NR_041768.1)	2	Piscinibacter_aquaticus_strain_IMCC1728_(NR_043921.1)
Methylophilus_flavus_strain_Ship_(NR_104519.1)	4	Methylophilus_leisingeri_strain_DSM_6813_(NR_041258.1)	Methylophilus_luteus_strain_Mim_(NR_116847.1)	Methylophilus_rhizosphaerae_strain_CBMB127_(NR_116239.1)
Methylophilus_leisingeri_strain_DSM_6813_(NR_041258.1)	4	Methylophilus_flavus_strain_Ship_(NR_104519.1)	Methylophilus_luteus_strain_Mim_(NR_116847.1)	Methylophilus_rhizosphaerae_strain_CBMB127_(NR_116239.1)
Methylophilus_luteus_strain_Mim_(NR_116847.1)	4	Methylophilus_flavus_strain_Ship_(NR_104519.1)	Methylophilus_leisingeri_strain_DSM_6813_(NR_041258.1)	Methylophilus_rhizosphaerae_strain_CBMB127_(NR_116239.1)
Methylophilus_rhizosphaerae_strain_CBMB127_(NR_116239.1)	4	Methylophilus_flavus_strain_Ship_(NR_104519.1)	Methylophilus_leisingeri_strain_DSM_6813_(NR_041258.1)	Methylophilus_luteus_strain_Mim_(NR_116847.1)
Microterricola_viridarii_strain_KV-677_(NR_041548.1)	7	Frigoribacterium_faeni_strain_801_(NR_026511.1)	Frigoribacterium_faeni_strain_DSM_10309_(NR_115033.1)	Frondihabitans_australicus_strain_E1HC-02_(NR_043897.1)	Frondihabitans_peucedani_strain_RS-15_(NR_116933.1)	Phycicola_gilvus_strain_SSWW-21_(NR_042536.1)	Phycicola_gilvus_strain_SSWW-21_(NR_115867.1)
Moorella_thermoacetica_strain_JCM_9319_(NR_113196.1)	2	Moorella_thermoautotrophica_strain_JW_701/3_(NR_029144.1)
Moorella_thermoautotrophica_strain_JW_701/3_(NR_029144.1)	2	Moorella_thermoacetica_strain_JCM_9319_(NR_113196.1)
Mycobacterium_obuense_strain_47001_(NR_029218.1)	1
Nissabacter_archeti_strain_2134_(NR_147393.1)	17	Ewingella_americana_strain_CIP_81.94_(NR_104925.1)	Hafnia_paralvei_strain_ATCC_29927_(NR_116898.1)	Hafnia_psychrotolerans_strain_DJC1-1_(NR_134741.1)	Rahnella_bruchi_strain_FRB_226_(NR_146845.1)	Rahnella_genomosp._1_strain_CIP_105588_(NR_146849.1)	Rahnella_inusitata_strain_DSM_30078_(NR_146846.1)	Rahnella_victoriana_strain_FRB_225_(NR_146847.1)	Rahnella_woolbedingensis_strain_FRB_227_(NR_146848.1)	Rouxiella_chamberiensis_(NR_135871.1)	Serratia_aquatilis_strain_2015-2462-01_(NR_147771.1)	Serratia_fonticola_strain_DSM_4576_(NR_025339.1)	Serratia_fonticola_strain_LMG_7882_(NR_114577.1)	Serratia_fonticola_strain_NBRC_102597_(NR_114156.1)	Serratia_glossinae_strain_C1_(NR_116808.1)	Yersinia_entomophaga_strain_MH-1_(NR_115759.1)	Yersinia_nurmii_strain_APN3a-c_(NR_116782.1)
Nitrosomonas_europaea_strain_ATCC_25978_(NR_114606.1)	4	Nitrosomonas_europaea_strain_ATCC_25978_(NR_117368.1)	Nitrosomonas_europaea_strain_ATCC_25978_(NR_117649.1)	Nitrosomonas_europaea_strain_C-31_(NR_040879.1)
Nitrosomonas_europaea_strain_ATCC_25978_(NR_117368.1)	4	Nitrosomonas_europaea_strain_ATCC_25978_(NR_114606.1)	Nitrosomonas_europaea_strain_ATCC_25978_(NR_117649.1)	Nitrosomonas_europaea_strain_C-31_(NR_040879.1)
Nitrosomonas_europaea_strain_ATCC_25978_(NR_117649.1)	4	Nitrosomonas_europaea_strain_ATCC_25978_(NR_114606.1)	Nitrosomonas_europaea_strain_ATCC_25978_(NR_117368.1)	Nitrosomonas_europaea_strain_C-31_(NR_040879.1)
Nitrosomonas_europaea_strain_C-31_(NR_040879.1)	4	Nitrosomonas_europaea_strain_ATCC_25978_(NR_114606.1)	Nitrosomonas_europaea_strain_ATCC_25978_(NR_117368.1)	Nitrosomonas_europaea_strain_ATCC_25978_(NR_117649.1)
Nocardia_coubleae_strain_OFN_N12_(NR_104567.1)	12	Nocardia_cummidelens_strain_DSM_44490_(NR_041871.1)	Nocardia_cummidelens_strain_R89_(NR_114570.1)	Nocardia_fluminea_(NR_117325.1)	Nocardia_fluminea_strain_DSM_44489_(NR_114644.1)	Nocardia_ignorata_(NR_117326.1)	Nocardia_ignorata_strain_DSM_44496_(NR_115166.1)	Nocardia_ignorata_strain_DSM_44496_(NR_115832.1)	Nocardia_ignorata_strain_IMMIB_R-1434_(NR_028006.1)	Nocardia_salmonicida_strain_DSM_40472_(NR_041869.1)	Nocardia_soli_strain_DSM_44488_(NR_041870.1)	Nocardia_soli_strain_W30_(NR_114571.1)
Nocardia_cummidelens_strain_DSM_44490_(NR_041871.1)	12	Nocardia_coubleae_strain_OFN_N12_(NR_104567.1)	Nocardia_cummidelens_strain_R89_(NR_114570.1)	Nocardia_fluminea_(NR_117325.1)	Nocardia_fluminea_strain_DSM_44489_(NR_114644.1)	Nocardia_ignorata_(NR_117326.1)	Nocardia_ignorata_strain_DSM_44496_(NR_115166.1)	Nocardia_ignorata_strain_DSM_44496_(NR_115832.1)	Nocardia_ignorata_strain_IMMIB_R-1434_(NR_028006.1)	Nocardia_salmonicida_strain_DSM_40472_(NR_041869.1)	Nocardia_soli_strain_DSM_44488_(NR_041870.1)	Nocardia_soli_strain_W30_(NR_114571.1)
Nocardia_cummidelens_strain_R89_(NR_114570.1)	12	Nocardia_coubleae_strain_OFN_N12_(NR_104567.1)	Nocardia_cummidelens_strain_DSM_44490_(NR_041871.1)	Nocardia_fluminea_(NR_117325.1)	Nocardia_fluminea_strain_DSM_44489_(NR_114644.1)	Nocardia_ignorata_(NR_117326.1)	Nocardia_ignorata_strain_DSM_44496_(NR_115166.1)	Nocardia_ignorata_strain_DSM_44496_(NR_115832.1)	Nocardia_ignorata_strain_IMMIB_R-1434_(NR_028006.1)	Nocardia_salmonicida_strain_DSM_40472_(NR_041869.1)	Nocardia_soli_strain_DSM_44488_(NR_041870.1)	Nocardia_soli_strain_W30_(NR_114571.1)
Nocardia_fluminea_(NR_117325.1)	12	Nocardia_coubleae_strain_OFN_N12_(NR_104567.1)	Nocardia_cummidelens_strain_DSM_44490_(NR_041871.1)	Nocardia_cummidelens_strain_R89_(NR_114570.1)	Nocardia_fluminea_strain_DSM_44489_(NR_114644.1)	Nocardia_ignorata_(NR_117326.1)	Nocardia_ignorata_strain_DSM_44496_(NR_115166.1)	Nocardia_ignorata_strain_DSM_44496_(NR_115832.1)	Nocardia_ignorata_strain_IMMIB_R-1434_(NR_028006.1)	Nocardia_salmonicida_strain_DSM_40472_(NR_041869.1)	Nocardia_soli_strain_DSM_44488_(NR_041870.1)	Nocardia_soli_strain_W30_(NR_114571.1)
Nocardia_fluminea_strain_DSM_44489_(NR_114644.1)	12	Nocardia_coubleae_strain_OFN_N12_(NR_104567.1)	Nocardia_cummidelens_strain_DSM_44490_(NR_041871.1)	Nocardia_cummidelens_strain_R89_(NR_114570.1)	Nocardia_fluminea_(NR_117325.1)	Nocardia_ignorata_(NR_117326.1)	Nocardia_ignorata_strain_DSM_44496_(NR_115166.1)	Nocardia_ignorata_strain_DSM_44496_(NR_115832.1)	Nocardia_ignorata_strain_IMMIB_R-1434_(NR_028006.1)	Nocardia_salmonicida_strain_DSM_40472_(NR_041869.1)	Nocardia_soli_strain_DSM_44488_(NR_041870.1)	Nocardia_soli_strain_W30_(NR_114571.1)
Nocardia_ignorata_(NR_117326.1)	12	Nocardia_coubleae_strain_OFN_N12_(NR_104567.1)	Nocardia_cummidelens_strain_DSM_44490_(NR_041871.1)	Nocardia_cummidelens_strain_R89_(NR_114570.1)	Nocardia_fluminea_(NR_117325.1)	Nocardia_fluminea_strain_DSM_44489_(NR_114644.1)	Nocardia_ignorata_strain_DSM_44496_(NR_115166.1)	Nocardia_ignorata_strain_DSM_44496_(NR_115832.1)	Nocardia_ignorata_strain_IMMIB_R-1434_(NR_028006.1)	Nocardia_salmonicida_strain_DSM_40472_(NR_041869.1)	Nocardia_soli_strain_DSM_44488_(NR_041870.1)	Nocardia_soli_strain_W30_(NR_114571.1)
Nocardia_ignorata_strain_DSM_44496_(NR_115166.1)	12	Nocardia_coubleae_strain_OFN_N12_(NR_104567.1)	Nocardia_cummidelens_strain_DSM_44490_(NR_041871.1)	Nocardia_cummidelens_strain_R89_(NR_114570.1)	Nocardia_fluminea_(NR_117325.1)	Nocardia_fluminea_strain_DSM_44489_(NR_114644.1)	Nocardia_ignorata_(NR_117326.1)	Nocardia_ignorata_strain_DSM_44496_(NR_115832.1)	Nocardia_ignorata_strain_IMMIB_R-1434_(NR_028006.1)	Nocardia_salmonicida_strain_DSM_40472_(NR_041869.1)	Nocardia_soli_strain_DSM_44488_(NR_041870.1)	Nocardia_soli_strain_W30_(NR_114571.1)
Nocardia_ignorata_strain_DSM_44496_(NR_115832.1)	12	Nocardia_coubleae_strain_OFN_N12_(NR_104567.1)	Nocardia_cummidelens_strain_DSM_44490_(NR_041871.1)	Nocardia_cummidelens_strain_R89_(NR_114570.1)	Nocardia_fluminea_(NR_117325.1)	Nocardia_fluminea_strain_DSM_44489_(NR_114644.1)	Nocardia_ignorata_(NR_117326.1)	Nocardia_ignorata_strain_DSM_44496_(NR_115166.1)	Nocardia_ignorata_strain_IMMIB_R-1434_(NR_028006.1)	Nocardia_salmonicida_strain_DSM_40472_(NR_041869.1)	Nocardia_soli_strain_DSM_44488_(NR_041870.1)	Nocardia_soli_strain_W30_(NR_114571.1)
Nocardia_ignorata_strain_IMMIB_R-1434_(NR_028006.1)	12	Nocardia_coubleae_strain_OFN_N12_(NR_104567.1)	Nocardia_cummidelens_strain_DSM_44490_(NR_041871.1)	Nocardia_cummidelens_strain_R89_(NR_114570.1)	Nocardia_fluminea_(NR_117325.1)	Nocardia_fluminea_strain_DSM_44489_(NR_114644.1)	Nocardia_ignorata_(NR_117326.1)	Nocardia_ignorata_strain_DSM_44496_(NR_115166.1)	Nocardia_ignorata_strain_DSM_44496_(NR_115832.1)	Nocardia_salmonicida_strain_DSM_40472_(NR_041869.1)	Nocardia_soli_strain_DSM_44488_(NR_041870.1)	Nocardia_soli_strain_W30_(NR_114571.1)
Nocardia_salmonicida_strain_DSM_40472_(NR_041869.1)	12	Nocardia_coubleae_strain_OFN_N12_(NR_104567.1)	Nocardia_cummidelens_strain_DSM_44490_(NR_041871.1)	Nocardia_cummidelens_strain_R89_(NR_114570.1)	Nocardia_fluminea_(NR_117325.1)	Nocardia_fluminea_strain_DSM_44489_(NR_114644.1)	Nocardia_ignorata_(NR_117326.1)	Nocardia_ignorata_strain_DSM_44496_(NR_115166.1)	Nocardia_ignorata_strain_DSM_44496_(NR_115832.1)	Nocardia_ignorata_strain_IMMIB_R-1434_(NR_028006.1)	Nocardia_soli_strain_DSM_44488_(NR_041870.1)	Nocardia_soli_strain_W30_(NR_114571.1)
Nocardia_soli_strain_DSM_44488_(NR_041870.1)	12	Nocardia_coubleae_strain_OFN_N12_(NR_104567.1)	Nocardia_cummidelens_strain_DSM_44490_(NR_041871.1)	Nocardia_cummidelens_strain_R89_(NR_114570.1)	Nocardia_fluminea_(NR_117325.1)	Nocardia_fluminea_strain_DSM_44489_(NR_114644.1)	Nocardia_ignorata_(NR_117326.1)	Nocardia_ignorata_strain_DSM_44496_(NR_115166.1)	Nocardia_ignorata_strain_DSM_44496_(NR_115832.1)	Nocardia_ignorata_strain_IMMIB_R-1434_(NR_028006.1)	Nocardia_salmonicida_strain_DSM_40472_(NR_041869.1)	Nocardia_soli_strain_W30_(NR_114571.1)
Nocardia_soli_strain_W30_(NR_114571.1)	12	Nocardia_coubleae_strain_OFN_N12_(NR_104567.1)	Nocardia_cummidelens_strain_DSM_44490_(NR_041871.1)	Nocardia_cummidelens_strain_R89_(NR_114570.1)	Nocardia_fluminea_(NR_117325.1)	Nocardia_fluminea_strain_DSM_44489_(NR_114644.1)	Nocardia_ignorata_(NR_117326.1)	Nocardia_ignorata_strain_DSM_44496_(NR_115166.1)	Nocardia_ignorata_strain_DSM_44496_(NR_115832.1)	Nocardia_ignorata_strain_IMMIB_R-1434_(NR_028006.1)	Nocardia_salmonicida_strain_DSM_40472_(NR_041869.1)	Nocardia_soli_strain_DSM_44488_(NR_041870.1)
Oerskovia_enterophila_strain_DSM_43852_(NR_026239.1)	8	Oerskovia_jenensis_strain_DSM_46000_(NR_025470.1)	Oerskovia_paurometabola_strain_DSM_14281_(NR_025471.1)	Oerskovia_turbata_strain_27_(NR_029279.1)	Oerskovia_turbata_strain_DSM_20577_(NR_119161.1)	Sanguibacter_antarcticus_strain_KOPRI_21702_(NR_044173.1)	Sanguibacter_marinus_strain_1-19_(NR_042311.1)	Sediminihabitans_luteus_strain_H97-3_(NR_114322.1)
Oerskovia_jenensis_strain_DSM_46000_(NR_025470.1)	8	Oerskovia_enterophila_strain_DSM_43852_(NR_026239.1)	Oerskovia_paurometabola_strain_DSM_14281_(NR_025471.1)	Oerskovia_turbata_strain_27_(NR_029279.1)	Oerskovia_turbata_strain_DSM_20577_(NR_119161.1)	Sanguibacter_antarcticus_strain_KOPRI_21702_(NR_044173.1)	Sanguibacter_marinus_strain_1-19_(NR_042311.1)	Sediminihabitans_luteus_strain_H97-3_(NR_114322.1)
Oerskovia_paurometabola_strain_DSM_14281_(NR_025471.1)	8	Oerskovia_enterophila_strain_DSM_43852_(NR_026239.1)	Oerskovia_jenensis_strain_DSM_46000_(NR_025470.1)	Oerskovia_turbata_strain_27_(NR_029279.1)	Oerskovia_turbata_strain_DSM_20577_(NR_119161.1)	Sanguibacter_antarcticus_strain_KOPRI_21702_(NR_044173.1)	Sanguibacter_marinus_strain_1-19_(NR_042311.1)	Sediminihabitans_luteus_strain_H97-3_(NR_114322.1)
Oerskovia_turbata_strain_27_(NR_029279.1)	8	Oerskovia_enterophila_strain_DSM_43852_(NR_026239.1)	Oerskovia_jenensis_strain_DSM_46000_(NR_025470.1)	Oerskovia_paurometabola_strain_DSM_14281_(NR_025471.1)	Oerskovia_turbata_strain_DSM_20577_(NR_119161.1)	Sanguibacter_antarcticus_strain_KOPRI_21702_(NR_044173.1)	Sanguibacter_marinus_strain_1-19_(NR_042311.1)	Sediminihabitans_luteus_strain_H97-3_(NR_114322.1)
Oerskovia_turbata_strain_DSM_20577_(NR_119161.1)	8	Oerskovia_enterophila_strain_DSM_43852_(NR_026239.1)	Oerskovia_jenensis_strain_DSM_46000_(NR_025470.1)	Oerskovia_paurometabola_strain_DSM_14281_(NR_025471.1)	Oerskovia_turbata_strain_27_(NR_029279.1)	Sanguibacter_antarcticus_strain_KOPRI_21702_(NR_044173.1)	Sanguibacter_marinus_strain_1-19_(NR_042311.1)	Sediminihabitans_luteus_strain_H97-3_(NR_114322.1)
Ohtaekwangia_koreensis_strain_3B-2_(NR_117435.1)	1
Ohtaekwangia_kribbensis_strain_10AO_(NR_117436.1)	1
Olleya_aquimaris_strain_L-4_(NR_104531.1)	1
Olleya_namhaensis_strain_WT-MY15_(NR_109551.1)	3	Formosa_spongicola_strain_A2_(NR_116612.1)	Ichthyenterobacterium_magnum_strain_Th6_(NR_134750.1)
Paenibacillus_alginolyticus_strain_DSM_5050_(NR_040893.1)	4	Paenibacillus_alginolyticus_strain_DSM_5050_(NR_115595.1)	Paenibacillus_alginolyticus_strain_NBRC_15375_(NR_113750.1)	Paenibacillus_frigoriresistens_strain_YIM_016_(NR_109546.1)
Paenibacillus_alginolyticus_strain_DSM_5050_(NR_115595.1)	4	Paenibacillus_alginolyticus_strain_DSM_5050_(NR_040893.1)	Paenibacillus_alginolyticus_strain_NBRC_15375_(NR_113750.1)	Paenibacillus_frigoriresistens_strain_YIM_016_(NR_109546.1)
Paenibacillus_alginolyticus_strain_NBRC_15375_(NR_113750.1)	4	Paenibacillus_alginolyticus_strain_DSM_5050_(NR_040893.1)	Paenibacillus_alginolyticus_strain_DSM_5050_(NR_115595.1)	Paenibacillus_frigoriresistens_strain_YIM_016_(NR_109546.1)
Paenibacillus_frigoriresistens_strain_YIM_016_(NR_109546.1)	4	Paenibacillus_alginolyticus_strain_DSM_5050_(NR_040893.1)	Paenibacillus_alginolyticus_strain_DSM_5050_(NR_115595.1)	Paenibacillus_alginolyticus_strain_NBRC_15375_(NR_113750.1)
Paracoccus_bengalensis_strain_JJJ_(NR_042359.1)	9	Paracoccus_ferrooxidans_strain_BDN-1_(NR_115343.1)	Paracoccus_pantotrophus_strain_ATCC_35512_(NR_026457.1)	Paracoccus_pantotrophus_strain_NBRC_102493_(NR_114120.1)	Paracoccus_versutus_strain_ATCC_25364_(NR_042713.1)	Paracoccus_versutus_strain_ATCC_25364_(NR_119266.1)	Paracoccus_versutus_strain_DSM_582_(NR_119265.1)	Paracoccus_versutus_strain_IAM_12814_(NR_115555.1)	Paracoccus_versutus_strain_NBRC_14567_(NR_113662.1)
Paracoccus_ferrooxidans_strain_BDN-1_(NR_115343.1)	9	Paracoccus_bengalensis_strain_JJJ_(NR_042359.1)	Paracoccus_pantotrophus_strain_ATCC_35512_(NR_026457.1)	Paracoccus_pantotrophus_strain_NBRC_102493_(NR_114120.1)	Paracoccus_versutus_strain_ATCC_25364_(NR_042713.1)	Paracoccus_versutus_strain_ATCC_25364_(NR_119266.1)	Paracoccus_versutus_strain_DSM_582_(NR_119265.1)	Paracoccus_versutus_strain_IAM_12814_(NR_115555.1)	Paracoccus_versutus_strain_NBRC_14567_(NR_113662.1)
Paracoccus_pantotrophus_strain_ATCC_35512_(NR_026457.1)	9	Paracoccus_bengalensis_strain_JJJ_(NR_042359.1)	Paracoccus_ferrooxidans_strain_BDN-1_(NR_115343.1)	Paracoccus_pantotrophus_strain_NBRC_102493_(NR_114120.1)	Paracoccus_versutus_strain_ATCC_25364_(NR_042713.1)	Paracoccus_versutus_strain_ATCC_25364_(NR_119266.1)	Paracoccus_versutus_strain_DSM_582_(NR_119265.1)	Paracoccus_versutus_strain_IAM_12814_(NR_115555.1)	Paracoccus_versutus_strain_NBRC_14567_(NR_113662.1)
Paracoccus_pantotrophus_strain_NBRC_102493_(NR_114120.1)	9	Paracoccus_bengalensis_strain_JJJ_(NR_042359.1)	Paracoccus_ferrooxidans_strain_BDN-1_(NR_115343.1)	Paracoccus_pantotrophus_strain_ATCC_35512_(NR_026457.1)	Paracoccus_versutus_strain_ATCC_25364_(NR_042713.1)	Paracoccus_versutus_strain_ATCC_25364_(NR_119266.1)	Paracoccus_versutus_strain_DSM_582_(NR_119265.1)	Paracoccus_versutus_strain_IAM_12814_(NR_115555.1)	Paracoccus_versutus_strain_NBRC_14567_(NR_113662.1)
Paracoccus_versutus_strain_ATCC_25364_(NR_042713.1)	9	Paracoccus_bengalensis_strain_JJJ_(NR_042359.1)	Paracoccus_ferrooxidans_strain_BDN-1_(NR_115343.1)	Paracoccus_pantotrophus_strain_ATCC_35512_(NR_026457.1)	Paracoccus_pantotrophus_strain_NBRC_102493_(NR_114120.1)	Paracoccus_versutus_strain_ATCC_25364_(NR_119266.1)	Paracoccus_versutus_strain_DSM_582_(NR_119265.1)	Paracoccus_versutus_strain_IAM_12814_(NR_115555.1)	Paracoccus_versutus_strain_NBRC_14567_(NR_113662.1)
Paracoccus_versutus_strain_ATCC_25364_(NR_119266.1)	9	Paracoccus_bengalensis_strain_JJJ_(NR_042359.1)	Paracoccus_ferrooxidans_strain_BDN-1_(NR_115343.1)	Paracoccus_pantotrophus_strain_ATCC_35512_(NR_026457.1)	Paracoccus_pantotrophus_strain_NBRC_102493_(NR_114120.1)	Paracoccus_versutus_strain_ATCC_25364_(NR_042713.1)	Paracoccus_versutus_strain_DSM_582_(NR_119265.1)	Paracoccus_versutus_strain_IAM_12814_(NR_115555.1)	Paracoccus_versutus_strain_NBRC_14567_(NR_113662.1)
Paracoccus_versutus_strain_DSM_582_(NR_119265.1)	9	Paracoccus_bengalensis_strain_JJJ_(NR_042359.1)	Paracoccus_ferrooxidans_strain_BDN-1_(NR_115343.1)	Paracoccus_pantotrophus_strain_ATCC_35512_(NR_026457.1)	Paracoccus_pantotrophus_strain_NBRC_102493_(NR_114120.1)	Paracoccus_versutus_strain_ATCC_25364_(NR_042713.1)	Paracoccus_versutus_strain_ATCC_25364_(NR_119266.1)	Paracoccus_versutus_strain_IAM_12814_(NR_115555.1)	Paracoccus_versutus_strain_NBRC_14567_(NR_113662.1)
Paracoccus_versutus_strain_IAM_12814_(NR_115555.1)	9	Paracoccus_bengalensis_strain_JJJ_(NR_042359.1)	Paracoccus_ferrooxidans_strain_BDN-1_(NR_115343.1)	Paracoccus_pantotrophus_strain_ATCC_35512_(NR_026457.1)	Paracoccus_pantotrophus_strain_NBRC_102493_(NR_114120.1)	Paracoccus_versutus_strain_ATCC_25364_(NR_042713.1)	Paracoccus_versutus_strain_ATCC_25364_(NR_119266.1)	Paracoccus_versutus_strain_DSM_582_(NR_119265.1)	Paracoccus_versutus_strain_NBRC_14567_(NR_113662.1)
Paracoccus_versutus_strain_NBRC_14567_(NR_113662.1)	9	Paracoccus_bengalensis_strain_JJJ_(NR_042359.1)	Paracoccus_ferrooxidans_strain_BDN-1_(NR_115343.1)	Paracoccus_pantotrophus_strain_ATCC_35512_(NR_026457.1)	Paracoccus_pantotrophus_strain_NBRC_102493_(NR_114120.1)	Paracoccus_versutus_strain_ATCC_25364_(NR_042713.1)	Paracoccus_versutus_strain_ATCC_25364_(NR_119266.1)	Paracoccus_versutus_strain_DSM_582_(NR_119265.1)	Paracoccus_versutus_strain_IAM_12814_(NR_115555.1)
Pedobacter_agri_strain_PB92_(NR_044339.1)	11	Pedobacter_alluvionis_strain_NWER-II11_(NR_044382.1)	Pedobacter_borealis_strain_G-1_(NR_044381.1)	Pedobacter_ginsenosidimutans_strain_THG-45_(NR_108685.1)	Pedobacter_jeongneungensis_strain_BH45_(NR_132685.1)	Pedobacter_kyungheensis_strain_THG-T17_(NR_132668.1)	Pedobacter_roseus_strain_CL-GP80_(NR_043555.1)	Pedobacter_sandarakinus_strain_DS-27_(NR_043665.1)	Pedobacter_soli_strain_15-51_(NR_115008.1)	Pedobacter_suwonensis_strain_15-52_(NR_043543.1)	Pedobacter_terrae_strain_DS-57_(NR_044005.1)
Pedobacter_alluvionis_strain_NWER-II11_(NR_044382.1)	11	Pedobacter_agri_strain_PB92_(NR_044339.1)	Pedobacter_borealis_strain_G-1_(NR_044381.1)	Pedobacter_ginsenosidimutans_strain_THG-45_(NR_108685.1)	Pedobacter_jeongneungensis_strain_BH45_(NR_132685.1)	Pedobacter_kyungheensis_strain_THG-T17_(NR_132668.1)	Pedobacter_roseus_strain_CL-GP80_(NR_043555.1)	Pedobacter_sandarakinus_strain_DS-27_(NR_043665.1)	Pedobacter_soli_strain_15-51_(NR_115008.1)	Pedobacter_suwonensis_strain_15-52_(NR_043543.1)	Pedobacter_terrae_strain_DS-57_(NR_044005.1)
Pedobacter_borealis_strain_G-1_(NR_044381.1)	11	Pedobacter_agri_strain_PB92_(NR_044339.1)	Pedobacter_alluvionis_strain_NWER-II11_(NR_044382.1)	Pedobacter_ginsenosidimutans_strain_THG-45_(NR_108685.1)	Pedobacter_jeongneungensis_strain_BH45_(NR_132685.1)	Pedobacter_kyungheensis_strain_THG-T17_(NR_132668.1)	Pedobacter_roseus_strain_CL-GP80_(NR_043555.1)	Pedobacter_sandarakinus_strain_DS-27_(NR_043665.1)	Pedobacter_soli_strain_15-51_(NR_115008.1)	Pedobacter_suwonensis_strain_15-52_(NR_043543.1)	Pedobacter_terrae_strain_DS-57_(NR_044005.1)
Pedobacter_ginsenosidimutans_strain_THG-45_(NR_108685.1)	11	Pedobacter_agri_strain_PB92_(NR_044339.1)	Pedobacter_alluvionis_strain_NWER-II11_(NR_044382.1)	Pedobacter_borealis_strain_G-1_(NR_044381.1)	Pedobacter_jeongneungensis_strain_BH45_(NR_132685.1)	Pedobacter_kyungheensis_strain_THG-T17_(NR_132668.1)	Pedobacter_roseus_strain_CL-GP80_(NR_043555.1)	Pedobacter_sandarakinus_strain_DS-27_(NR_043665.1)	Pedobacter_soli_strain_15-51_(NR_115008.1)	Pedobacter_suwonensis_strain_15-52_(NR_043543.1)	Pedobacter_terrae_strain_DS-57_(NR_044005.1)
Pedobacter_jejuensis_strain_THG-DR3_(NR_133810.1)	1
Pedobacter_jeongneungensis_strain_BH45_(NR_132685.1)	11	Pedobacter_agri_strain_PB92_(NR_044339.1)	Pedobacter_alluvionis_strain_NWER-II11_(NR_044382.1)	Pedobacter_borealis_strain_G-1_(NR_044381.1)	Pedobacter_ginsenosidimutans_strain_THG-45_(NR_108685.1)	Pedobacter_kyungheensis_strain_THG-T17_(NR_132668.1)	Pedobacter_roseus_strain_CL-GP80_(NR_043555.1)	Pedobacter_sandarakinus_strain_DS-27_(NR_043665.1)	Pedobacter_soli_strain_15-51_(NR_115008.1)	Pedobacter_suwonensis_strain_15-52_(NR_043543.1)	Pedobacter_terrae_strain_DS-57_(NR_044005.1)
Pedobacter_kyungheensis_strain_THG-T17_(NR_132668.1)	11	Pedobacter_agri_strain_PB92_(NR_044339.1)	Pedobacter_alluvionis_strain_NWER-II11_(NR_044382.1)	Pedobacter_borealis_strain_G-1_(NR_044381.1)	Pedobacter_ginsenosidimutans_strain_THG-45_(NR_108685.1)	Pedobacter_jeongneungensis_strain_BH45_(NR_132685.1)	Pedobacter_roseus_strain_CL-GP80_(NR_043555.1)	Pedobacter_sandarakinus_strain_DS-27_(NR_043665.1)	Pedobacter_soli_strain_15-51_(NR_115008.1)	Pedobacter_suwonensis_strain_15-52_(NR_043543.1)	Pedobacter_terrae_strain_DS-57_(NR_044005.1)
Pedobacter_roseus_strain_CL-GP80_(NR_043555.1)	11	Pedobacter_agri_strain_PB92_(NR_044339.1)	Pedobacter_alluvionis_strain_NWER-II11_(NR_044382.1)	Pedobacter_borealis_strain_G-1_(NR_044381.1)	Pedobacter_ginsenosidimutans_strain_THG-45_(NR_108685.1)	Pedobacter_jeongneungensis_strain_BH45_(NR_132685.1)	Pedobacter_kyungheensis_strain_THG-T17_(NR_132668.1)	Pedobacter_sandarakinus_strain_DS-27_(NR_043665.1)	Pedobacter_soli_strain_15-51_(NR_115008.1)	Pedobacter_suwonensis_strain_15-52_(NR_043543.1)	Pedobacter_terrae_strain_DS-57_(NR_044005.1)
Pedobacter_sandarakinus_strain_DS-27_(NR_043665.1)	11	Pedobacter_agri_strain_PB92_(NR_044339.1)	Pedobacter_alluvionis_strain_NWER-II11_(NR_044382.1)	Pedobacter_borealis_strain_G-1_(NR_044381.1)	Pedobacter_ginsenosidimutans_strain_THG-45_(NR_108685.1)	Pedobacter_jeongneungensis_strain_BH45_(NR_132685.1)	Pedobacter_kyungheensis_strain_THG-T17_(NR_132668.1)	Pedobacter_roseus_strain_CL-GP80_(NR_043555.1)	Pedobacter_soli_strain_15-51_(NR_115008.1)	Pedobacter_suwonensis_strain_15-52_(NR_043543.1)	Pedobacter_terrae_strain_DS-57_(NR_044005.1)
Pedobacter_soli_strain_15-51_(NR_115008.1)	11	Pedobacter_agri_strain_PB92_(NR_044339.1)	Pedobacter_alluvionis_strain_NWER-II11_(NR_044382.1)	Pedobacter_borealis_strain_G-1_(NR_044381.1)	Pedobacter_ginsenosidimutans_strain_THG-45_(NR_108685.1)	Pedobacter_jeongneungensis_strain_BH45_(NR_132685.1)	Pedobacter_kyungheensis_strain_THG-T17_(NR_132668.1)	Pedobacter_roseus_strain_CL-GP80_(NR_043555.1)	Pedobacter_sandarakinus_strain_DS-27_(NR_043665.1)	Pedobacter_suwonensis_strain_15-52_(NR_043543.1)	Pedobacter_terrae_strain_DS-57_(NR_044005.1)
Pedobacter_suwonensis_strain_15-52_(NR_043543.1)	11	Pedobacter_agri_strain_PB92_(NR_044339.1)	Pedobacter_alluvionis_strain_NWER-II11_(NR_044382.1)	Pedobacter_borealis_strain_G-1_(NR_044381.1)	Pedobacter_ginsenosidimutans_strain_THG-45_(NR_108685.1)	Pedobacter_jeongneungensis_strain_BH45_(NR_132685.1)	Pedobacter_kyungheensis_strain_THG-T17_(NR_132668.1)	Pedobacter_roseus_strain_CL-GP80_(NR_043555.1)	Pedobacter_sandarakinus_strain_DS-27_(NR_043665.1)	Pedobacter_soli_strain_15-51_(NR_115008.1)	Pedobacter_terrae_strain_DS-57_(NR_044005.1)
Pedobacter_terrae_strain_DS-57_(NR_044005.1)	11	Pedobacter_agri_strain_PB92_(NR_044339.1)	Pedobacter_alluvionis_strain_NWER-II11_(NR_044382.1)	Pedobacter_borealis_strain_G-1_(NR_044381.1)	Pedobacter_ginsenosidimutans_strain_THG-45_(NR_108685.1)	Pedobacter_jeongneungensis_strain_BH45_(NR_132685.1)	Pedobacter_kyungheensis_strain_THG-T17_(NR_132668.1)	Pedobacter_roseus_strain_CL-GP80_(NR_043555.1)	Pedobacter_sandarakinus_strain_DS-27_(NR_043665.1)	Pedobacter_soli_strain_15-51_(NR_115008.1)	Pedobacter_suwonensis_strain_15-52_(NR_043543.1)
Phaeospirillum_molischianum_strain_DSM_120_(NR_104755.1)	1
Phenylobacterium_lituiforme_strain_FaiI3_(NR_029117.1)	3	Phenylobacterium_zucineum_strain_HLK1_(NR_074119.1)	Phenylobacterium_zucineum_strain_HLK1_(NR_115292.1)
Phenylobacterium_zucineum_strain_HLK1_(NR_074119.1)	3	Phenylobacterium_lituiforme_strain_FaiI3_(NR_029117.1)	Phenylobacterium_zucineum_strain_HLK1_(NR_115292.1)
Phenylobacterium_zucineum_strain_HLK1_(NR_115292.1)	3	Phenylobacterium_lituiforme_strain_FaiI3_(NR_029117.1)	Phenylobacterium_zucineum_strain_HLK1_(NR_074119.1)
Phycicoccus_badiiscoriae_strain_Sco-B23_(NR_108472.1)	10	Janibacter_anophelis_strain_H2.16B_(NR_043218.1)	Janibacter_hoylei_strain_PVAS-1_(NR_104794.1)	Janibacter_limosus_strain_DSM_11140_(NR_026362.1)	Janibacter_melonis_strain_CM2104_(NR_025805.1)	Knoellia_locipacati_strain_DMZ1_(NR_109064.1)	Knoellia_sinensis_strain_HKI_0119_(NR_028931.1)	Knoellia_subterranea_strain_HKI_0120_(NR_028932.1)	Phycicoccus_ochangensis_strain_L1b-b9_(NR_132688.1)	Tetrasphaera_remsis_strain_3-M5-R-4_(NR_104693.1)
Phycicoccus_dokdonensis_strain_DS-8_(NR_044286.1)	1
Phycicoccus_ochangensis_strain_L1b-b9_(NR_132688.1)	10	Janibacter_anophelis_strain_H2.16B_(NR_043218.1)	Janibacter_hoylei_strain_PVAS-1_(NR_104794.1)	Janibacter_limosus_strain_DSM_11140_(NR_026362.1)	Janibacter_melonis_strain_CM2104_(NR_025805.1)	Knoellia_locipacati_strain_DMZ1_(NR_109064.1)	Knoellia_sinensis_strain_HKI_0119_(NR_028931.1)	Knoellia_subterranea_strain_HKI_0120_(NR_028932.1)	Phycicoccus_badiiscoriae_strain_Sco-B23_(NR_108472.1)	Tetrasphaera_remsis_strain_3-M5-R-4_(NR_104693.1)
Phycicola_gilvus_strain_SSWW-21_(NR_042536.1)	7	Frigoribacterium_faeni_strain_801_(NR_026511.1)	Frigoribacterium_faeni_strain_DSM_10309_(NR_115033.1)	Frondihabitans_australicus_strain_E1HC-02_(NR_043897.1)	Frondihabitans_peucedani_strain_RS-15_(NR_116933.1)	Microterricola_viridarii_strain_KV-677_(NR_041548.1)	Phycicola_gilvus_strain_SSWW-21_(NR_115867.1)
Phycicola_gilvus_strain_SSWW-21_(NR_115867.1)	7	Frigoribacterium_faeni_strain_801_(NR_026511.1)	Frigoribacterium_faeni_strain_DSM_10309_(NR_115033.1)	Frondihabitans_australicus_strain_E1HC-02_(NR_043897.1)	Frondihabitans_peucedani_strain_RS-15_(NR_116933.1)	Microterricola_viridarii_strain_KV-677_(NR_041548.1)	Phycicola_gilvus_strain_SSWW-21_(NR_042536.1)
Picrophilus_torridus_strain_DSM_9790_(NR_074187.1)	1
Piscinibacter_aquaticus_strain_IMCC1728_(NR_043921.1)	2	Methylibium_petroleiphilum_strain_PM1_(NR_041768.1)
Porphyromonas_cansulci_strain_JCM_13913_(NR_113081.1)	5	Porphyromonas_cansulci_strain_VPB_4875_(NR_026137.1)	Porphyromonas_crevioricanis_strain_ATCC_55563_(NR_115856.1)	Porphyromonas_crevioricanis_strain_JCM_15906_(NR_113084.1)	Porphyromonas_crevioricanis_strain_NUM_402_(NR_104834.1)
Porphyromonas_cansulci_strain_VPB_4875_(NR_026137.1)	5	Porphyromonas_cansulci_strain_JCM_13913_(NR_113081.1)	Porphyromonas_crevioricanis_strain_ATCC_55563_(NR_115856.1)	Porphyromonas_crevioricanis_strain_JCM_15906_(NR_113084.1)	Porphyromonas_crevioricanis_strain_NUM_402_(NR_104834.1)
Porphyromonas_crevioricanis_strain_ATCC_55563_(NR_115856.1)	5	Porphyromonas_cansulci_strain_JCM_13913_(NR_113081.1)	Porphyromonas_cansulci_strain_VPB_4875_(NR_026137.1)	Porphyromonas_crevioricanis_strain_JCM_15906_(NR_113084.1)	Porphyromonas_crevioricanis_strain_NUM_402_(NR_104834.1)
Porphyromonas_crevioricanis_strain_JCM_15906_(NR_113084.1)	5	Porphyromonas_cansulci_strain_JCM_13913_(NR_113081.1)	Porphyromonas_cansulci_strain_VPB_4875_(NR_026137.1)	Porphyromonas_crevioricanis_strain_ATCC_55563_(NR_115856.1)	Porphyromonas_crevioricanis_strain_NUM_402_(NR_104834.1)
Porphyromonas_crevioricanis_strain_NUM_402_(NR_104834.1)	5	Porphyromonas_cansulci_strain_JCM_13913_(NR_113081.1)	Porphyromonas_cansulci_strain_VPB_4875_(NR_026137.1)	Porphyromonas_crevioricanis_strain_ATCC_55563_(NR_115856.1)	Porphyromonas_crevioricanis_strain_JCM_15906_(NR_113084.1)
Prauserella_marina_strain_Ms498_(NR_104535.1)	91	Streptomyces_acrimycini_strain_CSSP430_(NR_115449.1)	Streptomyces_albolongus_strain_NBRC_13465_(NR_041144.1)	Streptomyces_albovinaceus_strain_CSSP418_(NR_115373.1)	Streptomyces_alboviridis_strain_CSSP419_(NR_115374.1)	Streptomyces_alboviridis_strain_NBRC_13013_(NR_112340.1)	Streptomyces_anulatus_strain_NBRC_12755_(NR_041062.1)	Streptomyces_anulatus_strain_NBRC_13369_(NR_112527.1)	Streptomyces_anulatus_strain_NRRL_B-2000_(NR_043489.1)	Streptomyces_argenteolus_strain_JCM_4623_(NR_112120.1)	Streptomyces_argenteolus_strain_NBRC_12841_(NR_112300.1)	Streptomyces_baarnensis_strain_NBRC_14727_(NR_112440.1)	Streptomyces_baarnensis_strain_NRRL_B-1902_(NR_115964.1)	Streptomyces_bacillaris_strain_NBRC_13487_(NR_041146.1)	Streptomyces_badius_strain_CSSP536_(NR_043350.1)	Streptomyces_badius_strain_NBRC_12745_(NR_112256.1)	Streptomyces_californicus_strain_CSSP711_(NR_115432.1)	Streptomyces_californicus_strain_NBRC_12750_(NR_112257.1)	Streptomyces_californicus_strain_NBRC_3386_(NR_112486.1)	Streptomyces_caviscabies_strain_ATCC_51928_(NR_114493.1)	Streptomyces_cavourensis_strain_NBRC_13026_(NR_112345.1)	Streptomyces_cavourensis_strain_NRRL_2740_(NR_043851.1)	Streptomyces_cinereorectus_strain_NBRC_15395_(NR_041173.1)	Streptomyces_crystallinus_strain_CSSP421_(NR_115376.1)	Streptomyces_crystallinus_strain_NBRC_15401_(NR_041177.1)	Streptomyces_cyaneofuscatus_strain_CSSP436_(NR_115383.1)	Streptomyces_cyaneofuscatus_strain_NBRC_13190_(NR_041226.1)	Streptomyces_cyaneus_strain_ISP_5108_(NR_114820.1)	Streptomyces_erumpens_strain_NBRC_15403_(NR_112455.1)	Streptomyces_fimicarius_strain_CSSP537_(NR_043351.1)	Streptomyces_fimicarius_strain_NBRC_13037_(NR_112347.1)	Streptomyces_flavofuscus_strain_NBRC_100768_(NR_112591.1)	Streptomyces_flavofuscus_strain_NRRL_B-2594_(NR_115965.1)	Streptomyces_flavogriseus_strain_CBS_101.34_(NR_028988.1)	Streptomyces_flavogriseus_strain_NBRC_13040_(NR_112348.1)	Streptomyces_flavovirens_strain_NBRC_12771_(NR_112269.1)	Streptomyces_flavovirens_strain_NBRC_3412_(NR_112508.1)	Streptomyces_flavovirens_strain_NBRC_3716_(NR_112509.1)	Streptomyces_floridae_strain_NBRC_15405_(NR_112456.1)	Streptomyces_floridae_strain_NRRL_2423_(NR_115457.1)	Streptomyces_fulvissimus_strain_DSM_40593_(NR_103947.1)	Streptomyces_fulvorobeus_strain_NBRC_15897_(NR_041196.1)	Streptomyces_globisporus_strain_KCTC_9026_(NR_118107.1)	Streptomyces_globisporus_strain_NBRC_12867_(NR_112309.1)	Streptomyces_griseinus_strain_NBRC_12869_(NR_112311.1)	Streptomyces_griseobrunneus_strain_CSSP424_(NR_115448.1)	Streptomyces_griseobrunneus_strain_NBRC_12775_(NR_112577.1)	Streptomyces_griseolus_strain_AS_4.1864_(NR_116631.1)	Streptomyces_griseolus_strain_CSSP403_(NR_115447.1)
Prevotella_oulorum_strain_JCM_14966_(NR_113120.1)	2	Prevotella_oulorum_strain_WPH_179_(NR_029147.1)
Prevotella_oulorum_strain_WPH_179_(NR_029147.1)	2	Prevotella_oulorum_strain_JCM_14966_(NR_113120.1)
Promicromonospora_aerolata_strain_V-54A_(NR_027202.1)	5	Promicromonospora_umidemergens_strain_09-Be-007_(NR_116951.1)	Promicromonospora_umidemergens_strain_09-Be-007_(NR_117534.1)	Promicromonospora_vindobonensis_strain_V-45_(NR_042146.1)	Promicromonospora_xylanilytica_strain_YIM_61515_(NR_116577.1)
Promicromonospora_umidemergens_strain_09-Be-007_(NR_116951.1)	5	Promicromonospora_aerolata_strain_V-54A_(NR_027202.1)	Promicromonospora_umidemergens_strain_09-Be-007_(NR_117534.1)	Promicromonospora_vindobonensis_strain_V-45_(NR_042146.1)	Promicromonospora_xylanilytica_strain_YIM_61515_(NR_116577.1)
Promicromonospora_umidemergens_strain_09-Be-007_(NR_117534.1)	5	Promicromonospora_aerolata_strain_V-54A_(NR_027202.1)	Promicromonospora_umidemergens_strain_09-Be-007_(NR_116951.1)	Promicromonospora_vindobonensis_strain_V-45_(NR_042146.1)	Promicromonospora_xylanilytica_strain_YIM_61515_(NR_116577.1)
Promicromonospora_vindobonensis_strain_V-45_(NR_042146.1)	5	Promicromonospora_aerolata_strain_V-54A_(NR_027202.1)	Promicromonospora_umidemergens_strain_09-Be-007_(NR_116951.1)	Promicromonospora_umidemergens_strain_09-Be-007_(NR_117534.1)	Promicromonospora_xylanilytica_strain_YIM_61515_(NR_116577.1)
Promicromonospora_xylanilytica_strain_YIM_61515_(NR_116577.1)	5	Promicromonospora_aerolata_strain_V-54A_(NR_027202.1)	Promicromonospora_umidemergens_strain_09-Be-007_(NR_116951.1)	Promicromonospora_umidemergens_strain_09-Be-007_(NR_117534.1)	Promicromonospora_vindobonensis_strain_V-45_(NR_042146.1)
Propionispora_hippei_strain_KS_(NR_036875.1)	2	Propionispora_hippei_strain_KS_(NR_114884.1)
Propionispora_hippei_strain_KS_(NR_114884.1)	2	Propionispora_hippei_strain_KS_(NR_036875.1)
Pseudoxanthobacter_soli_strain_CC4_(NR_044225.1)	1
Rahnella_bruchi_strain_FRB_226_(NR_146845.1)	17	Ewingella_americana_strain_CIP_81.94_(NR_104925.1)	Hafnia_paralvei_strain_ATCC_29927_(NR_116898.1)	Hafnia_psychrotolerans_strain_DJC1-1_(NR_134741.1)	Nissabacter_archeti_strain_2134_(NR_147393.1)	Rahnella_genomosp._1_strain_CIP_105588_(NR_146849.1)	Rahnella_inusitata_strain_DSM_30078_(NR_146846.1)	Rahnella_victoriana_strain_FRB_225_(NR_146847.1)	Rahnella_woolbedingensis_strain_FRB_227_(NR_146848.1)	Rouxiella_chamberiensis_(NR_135871.1)	Serratia_aquatilis_strain_2015-2462-01_(NR_147771.1)	Serratia_fonticola_strain_DSM_4576_(NR_025339.1)	Serratia_fonticola_strain_LMG_7882_(NR_114577.1)	Serratia_fonticola_strain_NBRC_102597_(NR_114156.1)	Serratia_glossinae_strain_C1_(NR_116808.1)	Yersinia_entomophaga_strain_MH-1_(NR_115759.1)	Yersinia_nurmii_strain_APN3a-c_(NR_116782.1)
Rahnella_genomosp._1_strain_CIP_105588_(NR_146849.1)	17	Ewingella_americana_strain_CIP_81.94_(NR_104925.1)	Hafnia_paralvei_strain_ATCC_29927_(NR_116898.1)	Hafnia_psychrotolerans_strain_DJC1-1_(NR_134741.1)	Nissabacter_archeti_strain_2134_(NR_147393.1)	Rahnella_bruchi_strain_FRB_226_(NR_146845.1)	Rahnella_inusitata_strain_DSM_30078_(NR_146846.1)	Rahnella_victoriana_strain_FRB_225_(NR_146847.1)	Rahnella_woolbedingensis_strain_FRB_227_(NR_146848.1)	Rouxiella_chamberiensis_(NR_135871.1)	Serratia_aquatilis_strain_2015-2462-01_(NR_147771.1)	Serratia_fonticola_strain_DSM_4576_(NR_025339.1)	Serratia_fonticola_strain_LMG_7882_(NR_114577.1)	Serratia_fonticola_strain_NBRC_102597_(NR_114156.1)	Serratia_glossinae_strain_C1_(NR_116808.1)	Yersinia_entomophaga_strain_MH-1_(NR_115759.1)	Yersinia_nurmii_strain_APN3a-c_(NR_116782.1)
Rahnella_inusitata_strain_DSM_30078_(NR_146846.1)	17	Ewingella_americana_strain_CIP_81.94_(NR_104925.1)	Hafnia_paralvei_strain_ATCC_29927_(NR_116898.1)	Hafnia_psychrotolerans_strain_DJC1-1_(NR_134741.1)	Nissabacter_archeti_strain_2134_(NR_147393.1)	Rahnella_bruchi_strain_FRB_226_(NR_146845.1)	Rahnella_genomosp._1_strain_CIP_105588_(NR_146849.1)	Rahnella_victoriana_strain_FRB_225_(NR_146847.1)	Rahnella_woolbedingensis_strain_FRB_227_(NR_146848.1)	Rouxiella_chamberiensis_(NR_135871.1)	Serratia_aquatilis_strain_2015-2462-01_(NR_147771.1)	Serratia_fonticola_strain_DSM_4576_(NR_025339.1)	Serratia_fonticola_strain_LMG_7882_(NR_114577.1)	Serratia_fonticola_strain_NBRC_102597_(NR_114156.1)	Serratia_glossinae_strain_C1_(NR_116808.1)	Yersinia_entomophaga_strain_MH-1_(NR_115759.1)	Yersinia_nurmii_strain_APN3a-c_(NR_116782.1)
Rahnella_victoriana_strain_FRB_225_(NR_146847.1)	17	Ewingella_americana_strain_CIP_81.94_(NR_104925.1)	Hafnia_paralvei_strain_ATCC_29927_(NR_116898.1)	Hafnia_psychrotolerans_strain_DJC1-1_(NR_134741.1)	Nissabacter_archeti_strain_2134_(NR_147393.1)	Rahnella_bruchi_strain_FRB_226_(NR_146845.1)	Rahnella_genomosp._1_strain_CIP_105588_(NR_146849.1)	Rahnella_inusitata_strain_DSM_30078_(NR_146846.1)	Rahnella_woolbedingensis_strain_FRB_227_(NR_146848.1)	Rouxiella_chamberiensis_(NR_135871.1)	Serratia_aquatilis_strain_2015-2462-01_(NR_147771.1)	Serratia_fonticola_strain_DSM_4576_(NR_025339.1)	Serratia_fonticola_strain_LMG_7882_(NR_114577.1)	Serratia_fonticola_strain_NBRC_102597_(NR_114156.1)	Serratia_glossinae_strain_C1_(NR_116808.1)	Yersinia_entomophaga_strain_MH-1_(NR_115759.1)	Yersinia_nurmii_strain_APN3a-c_(NR_116782.1)
Rahnella_woolbedingensis_strain_FRB_227_(NR_146848.1)	17	Ewingella_americana_strain_CIP_81.94_(NR_104925.1)	Hafnia_paralvei_strain_ATCC_29927_(NR_116898.1)	Hafnia_psychrotolerans_strain_DJC1-1_(NR_134741.1)	Nissabacter_archeti_strain_2134_(NR_147393.1)	Rahnella_bruchi_strain_FRB_226_(NR_146845.1)	Rahnella_genomosp._1_strain_CIP_105588_(NR_146849.1)	Rahnella_inusitata_strain_DSM_30078_(NR_146846.1)	Rahnella_victoriana_strain_FRB_225_(NR_146847.1)	Rouxiella_chamberiensis_(NR_135871.1)	Serratia_aquatilis_strain_2015-2462-01_(NR_147771.1)	Serratia_fonticola_strain_DSM_4576_(NR_025339.1)	Serratia_fonticola_strain_LMG_7882_(NR_114577.1)	Serratia_fonticola_strain_NBRC_102597_(NR_114156.1)	Serratia_glossinae_strain_C1_(NR_116808.1)	Yersinia_entomophaga_strain_MH-1_(NR_115759.1)	Yersinia_nurmii_strain_APN3a-c_(NR_116782.1)
Rhizobium_daejeonense_strain_L61_(NR_042851.1)	7	Agrobacterium_tumefaciens_strain_IAM_12048_(NR_041396.1)	Agrobacterium_tumefaciens_strain_NCPPB2437_(NR_115516.1)	Beijerinckia_fluminensis_strain_UQM_1685_(NR_116306.1)	Rhizobium_daejeonense_strain_NBRC_102495_(NR_114121.1)	Rhizobium_naphthalenivorans_strain_TSY03b_(NR_132669.1)	Rhizobium_nepotum_strain_39/7_(NR_117203.1)
Rhizobium_daejeonense_strain_NBRC_102495_(NR_114121.1)	7	Agrobacterium_tumefaciens_strain_IAM_12048_(NR_041396.1)	Agrobacterium_tumefaciens_strain_NCPPB2437_(NR_115516.1)	Beijerinckia_fluminensis_strain_UQM_1685_(NR_116306.1)	Rhizobium_daejeonense_strain_L61_(NR_042851.1)	Rhizobium_naphthalenivorans_strain_TSY03b_(NR_132669.1)	Rhizobium_nepotum_strain_39/7_(NR_117203.1)
Rhizobium_naphthalenivorans_strain_TSY03b_(NR_132669.1)	7	Agrobacterium_tumefaciens_strain_IAM_12048_(NR_041396.1)	Agrobacterium_tumefaciens_strain_NCPPB2437_(NR_115516.1)	Beijerinckia_fluminensis_strain_UQM_1685_(NR_116306.1)	Rhizobium_daejeonense_strain_L61_(NR_042851.1)	Rhizobium_daejeonense_strain_NBRC_102495_(NR_114121.1)	Rhizobium_nepotum_strain_39/7_(NR_117203.1)
Rhizobium_nepotum_strain_39/7_(NR_117203.1)	7	Agrobacterium_tumefaciens_strain_IAM_12048_(NR_041396.1)	Agrobacterium_tumefaciens_strain_NCPPB2437_(NR_115516.1)	Beijerinckia_fluminensis_strain_UQM_1685_(NR_116306.1)	Rhizobium_daejeonense_strain_L61_(NR_042851.1)	Rhizobium_daejeonense_strain_NBRC_102495_(NR_114121.1)	Rhizobium_naphthalenivorans_strain_TSY03b_(NR_132669.1)
Rhodobaca_barguzinensis_strain_VKM_B-2406_(NR_044285.1)	3	Rhodobaca_bogoriensis_strain_LBB1_(NR_025089.1)	Roseinatronobacter_monicus_strain_ROS_35_(NR_043914.1)
Rhodobaca_bogoriensis_strain_LBB1_(NR_025089.1)	3	Rhodobaca_barguzinensis_strain_VKM_B-2406_(NR_044285.1)	Roseinatronobacter_monicus_strain_ROS_35_(NR_043914.1)
Rhodobacter_capsulatus_strain_KC2137_(NR_115744.1)	4	Catellibacterium_nectariphilum_strain_AST4_(NR_112202.1)	Catellibacterium_nectariphilum_strain_NBRC_100046_(NR_113876.1)	Rhodobacter_viridis_strain_JA737_(NR_108854.1)
Rhodobacter_viridis_strain_JA737_(NR_108854.1)	4	Catellibacterium_nectariphilum_strain_AST4_(NR_112202.1)	Catellibacterium_nectariphilum_strain_NBRC_100046_(NR_113876.1)	Rhodobacter_capsulatus_strain_KC2137_(NR_115744.1)
Rhodococcus_cerastii_strain_C5_(NR_117103.1)	6	Rhodococcus_cercidiphylli_strain_YIM_65003_(NR_116275.1)	Rhodococcus_fascians_strain_ATCC_12974_(NR_119126.1)	Rhodococcus_fascians_strain_CF17_(NR_037021.1)	Rhodococcus_kyotonensis_strain_DS472_(NR_041512.1)	Rhodococcus_yunnanensis_strain_YIM_70056_(NR_043009.1)
Rhodococcus_cercidiphylli_strain_YIM_65003_(NR_116275.1)	6	Rhodococcus_cerastii_strain_C5_(NR_117103.1)	Rhodococcus_fascians_strain_ATCC_12974_(NR_119126.1)	Rhodococcus_fascians_strain_CF17_(NR_037021.1)	Rhodococcus_kyotonensis_strain_DS472_(NR_041512.1)	Rhodococcus_yunnanensis_strain_YIM_70056_(NR_043009.1)
Rhodococcus_fascians_strain_ATCC_12974_(NR_119126.1)	6	Rhodococcus_cerastii_strain_C5_(NR_117103.1)	Rhodococcus_cercidiphylli_strain_YIM_65003_(NR_116275.1)	Rhodococcus_fascians_strain_CF17_(NR_037021.1)	Rhodococcus_kyotonensis_strain_DS472_(NR_041512.1)	Rhodococcus_yunnanensis_strain_YIM_70056_(NR_043009.1)
Rhodococcus_fascians_strain_CF17_(NR_037021.1)	6	Rhodococcus_cerastii_strain_C5_(NR_117103.1)	Rhodococcus_cercidiphylli_strain_YIM_65003_(NR_116275.1)	Rhodococcus_fascians_strain_ATCC_12974_(NR_119126.1)	Rhodococcus_kyotonensis_strain_DS472_(NR_041512.1)	Rhodococcus_yunnanensis_strain_YIM_70056_(NR_043009.1)
Rhodococcus_kyotonensis_strain_DS472_(NR_041512.1)	6	Rhodococcus_cerastii_strain_C5_(NR_117103.1)	Rhodococcus_cercidiphylli_strain_YIM_65003_(NR_116275.1)	Rhodococcus_fascians_strain_ATCC_12974_(NR_119126.1)	Rhodococcus_fascians_strain_CF17_(NR_037021.1)	Rhodococcus_yunnanensis_strain_YIM_70056_(NR_043009.1)
Rhodococcus_yunnanensis_strain_YIM_70056_(NR_043009.1)	6	Rhodococcus_cerastii_strain_C5_(NR_117103.1)	Rhodococcus_cercidiphylli_strain_YIM_65003_(NR_116275.1)	Rhodococcus_fascians_strain_ATCC_12974_(NR_119126.1)	Rhodococcus_fascians_strain_CF17_(NR_037021.1)	Rhodococcus_kyotonensis_strain_DS472_(NR_041512.1)
Roseinatronobacter_monicus_strain_ROS_35_(NR_043914.1)	3	Rhodobaca_barguzinensis_strain_VKM_B-2406_(NR_044285.1)	Rhodobaca_bogoriensis_strain_LBB1_(NR_025089.1)
Rouxiella_chamberiensis_(NR_135871.1)	17	Ewingella_americana_strain_CIP_81.94_(NR_104925.1)	Hafnia_paralvei_strain_ATCC_29927_(NR_116898.1)	Hafnia_psychrotolerans_strain_DJC1-1_(NR_134741.1)	Nissabacter_archeti_strain_2134_(NR_147393.1)	Rahnella_bruchi_strain_FRB_226_(NR_146845.1)	Rahnella_genomosp._1_strain_CIP_105588_(NR_146849.1)	Rahnella_inusitata_strain_DSM_30078_(NR_146846.1)	Rahnella_victoriana_strain_FRB_225_(NR_146847.1)	Rahnella_woolbedingensis_strain_FRB_227_(NR_146848.1)	Serratia_aquatilis_strain_2015-2462-01_(NR_147771.1)	Serratia_fonticola_strain_DSM_4576_(NR_025339.1)	Serratia_fonticola_strain_LMG_7882_(NR_114577.1)	Serratia_fonticola_strain_NBRC_102597_(NR_114156.1)	Serratia_glossinae_strain_C1_(NR_116808.1)	Yersinia_entomophaga_strain_MH-1_(NR_115759.1)	Yersinia_nurmii_strain_APN3a-c_(NR_116782.1)
Sanguibacter_antarcticus_strain_KOPRI_21702_(NR_044173.1)	8	Oerskovia_enterophila_strain_DSM_43852_(NR_026239.1)	Oerskovia_jenensis_strain_DSM_46000_(NR_025470.1)	Oerskovia_paurometabola_strain_DSM_14281_(NR_025471.1)	Oerskovia_turbata_strain_27_(NR_029279.1)	Oerskovia_turbata_strain_DSM_20577_(NR_119161.1)	Sanguibacter_marinus_strain_1-19_(NR_042311.1)	Sediminihabitans_luteus_strain_H97-3_(NR_114322.1)
Sanguibacter_marinus_strain_1-19_(NR_042311.1)	8	Oerskovia_enterophila_strain_DSM_43852_(NR_026239.1)	Oerskovia_jenensis_strain_DSM_46000_(NR_025470.1)	Oerskovia_paurometabola_strain_DSM_14281_(NR_025471.1)	Oerskovia_turbata_strain_27_(NR_029279.1)	Oerskovia_turbata_strain_DSM_20577_(NR_119161.1)	Sanguibacter_antarcticus_strain_KOPRI_21702_(NR_044173.1)	Sediminihabitans_luteus_strain_H97-3_(NR_114322.1)
Sediminihabitans_luteus_strain_H97-3_(NR_114322.1)	8	Oerskovia_enterophila_strain_DSM_43852_(NR_026239.1)	Oerskovia_jenensis_strain_DSM_46000_(NR_025470.1)	Oerskovia_paurometabola_strain_DSM_14281_(NR_025471.1)	Oerskovia_turbata_strain_27_(NR_029279.1)	Oerskovia_turbata_strain_DSM_20577_(NR_119161.1)	Sanguibacter_antarcticus_strain_KOPRI_21702_(NR_044173.1)	Sanguibacter_marinus_strain_1-19_(NR_042311.1)
Serratia_aquatilis_strain_2015-2462-01_(NR_147771.1)	17	Ewingella_americana_strain_CIP_81.94_(NR_104925.1)	Hafnia_paralvei_strain_ATCC_29927_(NR_116898.1)	Hafnia_psychrotolerans_strain_DJC1-1_(NR_134741.1)	Nissabacter_archeti_strain_2134_(NR_147393.1)	Rahnella_bruchi_strain_FRB_226_(NR_146845.1)	Rahnella_genomosp._1_strain_CIP_105588_(NR_146849.1)	Rahnella_inusitata_strain_DSM_30078_(NR_146846.1)	Rahnella_victoriana_strain_FRB_225_(NR_146847.1)	Rahnella_woolbedingensis_strain_FRB_227_(NR_146848.1)	Rouxiella_chamberiensis_(NR_135871.1)	Serratia_fonticola_strain_DSM_4576_(NR_025339.1)	Serratia_fonticola_strain_LMG_7882_(NR_114577.1)	Serratia_fonticola_strain_NBRC_102597_(NR_114156.1)	Serratia_glossinae_strain_C1_(NR_116808.1)	Yersinia_entomophaga_strain_MH-1_(NR_115759.1)	Yersinia_nurmii_strain_APN3a-c_(NR_116782.1)
Serratia_fonticola_strain_DSM_4576_(NR_025339.1)	17	Ewingella_americana_strain_CIP_81.94_(NR_104925.1)	Hafnia_paralvei_strain_ATCC_29927_(NR_116898.1)	Hafnia_psychrotolerans_strain_DJC1-1_(NR_134741.1)	Nissabacter_archeti_strain_2134_(NR_147393.1)	Rahnella_bruchi_strain_FRB_226_(NR_146845.1)	Rahnella_genomosp._1_strain_CIP_105588_(NR_146849.1)	Rahnella_inusitata_strain_DSM_30078_(NR_146846.1)	Rahnella_victoriana_strain_FRB_225_(NR_146847.1)	Rahnella_woolbedingensis_strain_FRB_227_(NR_146848.1)	Rouxiella_chamberiensis_(NR_135871.1)	Serratia_aquatilis_strain_2015-2462-01_(NR_147771.1)	Serratia_fonticola_strain_LMG_7882_(NR_114577.1)	Serratia_fonticola_strain_NBRC_102597_(NR_114156.1)	Serratia_glossinae_strain_C1_(NR_116808.1)	Yersinia_entomophaga_strain_MH-1_(NR_115759.1)	Yersinia_nurmii_strain_APN3a-c_(NR_116782.1)
Serratia_fonticola_strain_LMG_7882_(NR_114577.1)	17	Ewingella_americana_strain_CIP_81.94_(NR_104925.1)	Hafnia_paralvei_strain_ATCC_29927_(NR_116898.1)	Hafnia_psychrotolerans_strain_DJC1-1_(NR_134741.1)	Nissabacter_archeti_strain_2134_(NR_147393.1)	Rahnella_bruchi_strain_FRB_226_(NR_146845.1)	Rahnella_genomosp._1_strain_CIP_105588_(NR_146849.1)	Rahnella_inusitata_strain_DSM_30078_(NR_146846.1)	Rahnella_victoriana_strain_FRB_225_(NR_146847.1)	Rahnella_woolbedingensis_strain_FRB_227_(NR_146848.1)	Rouxiella_chamberiensis_(NR_135871.1)	Serratia_aquatilis_strain_2015-2462-01_(NR_147771.1)	Serratia_fonticola_strain_DSM_4576_(NR_025339.1)	Serratia_fonticola_strain_NBRC_102597_(NR_114156.1)	Serratia_glossinae_strain_C1_(NR_116808.1)	Yersinia_entomophaga_strain_MH-1_(NR_115759.1)	Yersinia_nurmii_strain_APN3a-c_(NR_116782.1)
Serratia_fonticola_strain_NBRC_102597_(NR_114156.1)	17	Ewingella_americana_strain_CIP_81.94_(NR_104925.1)	Hafnia_paralvei_strain_ATCC_29927_(NR_116898.1)	Hafnia_psychrotolerans_strain_DJC1-1_(NR_134741.1)	Nissabacter_archeti_strain_2134_(NR_147393.1)	Rahnella_bruchi_strain_FRB_226_(NR_146845.1)	Rahnella_genomosp._1_strain_CIP_105588_(NR_146849.1)	Rahnella_inusitata_strain_DSM_30078_(NR_146846.1)	Rahnella_victoriana_strain_FRB_225_(NR_146847.1)	Rahnella_woolbedingensis_strain_FRB_227_(NR_146848.1)	Rouxiella_chamberiensis_(NR_135871.1)	Serratia_aquatilis_strain_2015-2462-01_(NR_147771.1)	Serratia_fonticola_strain_DSM_4576_(NR_025339.1)	Serratia_fonticola_strain_LMG_7882_(NR_114577.1)	Serratia_glossinae_strain_C1_(NR_116808.1)	Yersinia_entomophaga_strain_MH-1_(NR_115759.1)	Yersinia_nurmii_strain_APN3a-c_(NR_116782.1)
Serratia_glossinae_strain_C1_(NR_116808.1)	17	Ewingella_americana_strain_CIP_81.94_(NR_104925.1)	Hafnia_paralvei_strain_ATCC_29927_(NR_116898.1)	Hafnia_psychrotolerans_strain_DJC1-1_(NR_134741.1)	Nissabacter_archeti_strain_2134_(NR_147393.1)	Rahnella_bruchi_strain_FRB_226_(NR_146845.1)	Rahnella_genomosp._1_strain_CIP_105588_(NR_146849.1)	Rahnella_inusitata_strain_DSM_30078_(NR_146846.1)	Rahnella_victoriana_strain_FRB_225_(NR_146847.1)	Rahnella_woolbedingensis_strain_FRB_227_(NR_146848.1)	Rouxiella_chamberiensis_(NR_135871.1)	Serratia_aquatilis_strain_2015-2462-01_(NR_147771.1)	Serratia_fonticola_strain_DSM_4576_(NR_025339.1)	Serratia_fonticola_strain_LMG_7882_(NR_114577.1)	Serratia_fonticola_strain_NBRC_102597_(NR_114156.1)	Yersinia_entomophaga_strain_MH-1_(NR_115759.1)	Yersinia_nurmii_strain_APN3a-c_(NR_116782.1)
Sinorhizobium_kummerowiae_strain_CCBAU_71714_(NR_114614.1)	4	Sinorhizobium_meliloti_strain_IAM_12611_(NR_115485.1)	Sinorhizobium_meliloti_strain_LMG_6133_(NR_118988.1)	Sinorhizobium_meliloti_strain_NBRC_14782_(NR_113670.1)
Sinorhizobium_meliloti_strain_IAM_12611_(NR_115485.1)	4	Sinorhizobium_kummerowiae_strain_CCBAU_71714_(NR_114614.1)	Sinorhizobium_meliloti_strain_LMG_6133_(NR_118988.1)	Sinorhizobium_meliloti_strain_NBRC_14782_(NR_113670.1)
Sinorhizobium_meliloti_strain_LMG_6133_(NR_118988.1)	4	Sinorhizobium_kummerowiae_strain_CCBAU_71714_(NR_114614.1)	Sinorhizobium_meliloti_strain_IAM_12611_(NR_115485.1)	Sinorhizobium_meliloti_strain_NBRC_14782_(NR_113670.1)
Sinorhizobium_meliloti_strain_NBRC_14782_(NR_113670.1)	4	Sinorhizobium_kummerowiae_strain_CCBAU_71714_(NR_114614.1)	Sinorhizobium_meliloti_strain_IAM_12611_(NR_115485.1)	Sinorhizobium_meliloti_strain_LMG_6133_(NR_118988.1)
Sphingobacterium_nematocida_strain_M-SX103_(NR_122101.1)	1
Sphingomonas_aestuarii_strain_K4_(NR_044341.1)	1
Sphingomonas_endophytica_strain_YIM_65583_(NR_117869.1)	2	Sphingomonas_phyllosphaerae_strain_FA2_(NR_029111.1)
Sphingomonas_histidinilytica_strain_UM2_(NR_116043.1)	5	Sphingomonas_starnbergensis_strain_382_(NR_109485.1)	Sphingomonas_starnbergensis_strain_382_(NR_118124.1)	Sphingomonas_wittichii_RW1_(NR_074268.1)	Sphingomonas_wittichii_strain_RW1_(NR_027525.1)
Sphingomonas_phyllosphaerae_strain_FA2_(NR_029111.1)	2	Sphingomonas_endophytica_strain_YIM_65583_(NR_117869.1)
Sphingomonas_starnbergensis_strain_382_(NR_109485.1)	5	Sphingomonas_histidinilytica_strain_UM2_(NR_116043.1)	Sphingomonas_starnbergensis_strain_382_(NR_118124.1)	Sphingomonas_wittichii_RW1_(NR_074268.1)	Sphingomonas_wittichii_strain_RW1_(NR_027525.1)
Sphingomonas_starnbergensis_strain_382_(NR_118124.1)	5	Sphingomonas_histidinilytica_strain_UM2_(NR_116043.1)	Sphingomonas_starnbergensis_strain_382_(NR_109485.1)	Sphingomonas_wittichii_RW1_(NR_074268.1)	Sphingomonas_wittichii_strain_RW1_(NR_027525.1)
Sphingomonas_wittichii_RW1_(NR_074268.1)	5	Sphingomonas_histidinilytica_strain_UM2_(NR_116043.1)	Sphingomonas_starnbergensis_strain_382_(NR_109485.1)	Sphingomonas_starnbergensis_strain_382_(NR_118124.1)	Sphingomonas_wittichii_strain_RW1_(NR_027525.1)
Sphingomonas_wittichii_strain_RW1_(NR_027525.1)	5	Sphingomonas_histidinilytica_strain_UM2_(NR_116043.1)	Sphingomonas_starnbergensis_strain_382_(NR_109485.1)	Sphingomonas_starnbergensis_strain_382_(NR_118124.1)	Sphingomonas_wittichii_RW1_(NR_074268.1)
Streptomyces_acrimycini_strain_CSSP430_(NR_115449.1)	91	Prauserella_marina_strain_Ms498_(NR_104535.1)	Streptomyces_albolongus_strain_NBRC_13465_(NR_041144.1)	Streptomyces_albovinaceus_strain_CSSP418_(NR_115373.1)	Streptomyces_alboviridis_strain_CSSP419_(NR_115374.1)	Streptomyces_alboviridis_strain_NBRC_13013_(NR_112340.1)	Streptomyces_anulatus_strain_NBRC_12755_(NR_041062.1)	Streptomyces_anulatus_strain_NBRC_13369_(NR_112527.1)	Streptomyces_anulatus_strain_NRRL_B-2000_(NR_043489.1)	Streptomyces_argenteolus_strain_JCM_4623_(NR_112120.1)	Streptomyces_argenteolus_strain_NBRC_12841_(NR_112300.1)	Streptomyces_baarnensis_strain_NBRC_14727_(NR_112440.1)	Streptomyces_baarnensis_strain_NRRL_B-1902_(NR_115964.1)	Streptomyces_bacillaris_strain_NBRC_13487_(NR_041146.1)	Streptomyces_badius_strain_CSSP536_(NR_043350.1)	Streptomyces_badius_strain_NBRC_12745_(NR_112256.1)	Streptomyces_californicus_strain_CSSP711_(NR_115432.1)	Streptomyces_californicus_strain_NBRC_12750_(NR_112257.1)	Streptomyces_californicus_strain_NBRC_3386_(NR_112486.1)	Streptomyces_caviscabies_strain_ATCC_51928_(NR_114493.1)	Streptomyces_cavourensis_strain_NBRC_13026_(NR_112345.1)	Streptomyces_cavourensis_strain_NRRL_2740_(NR_043851.1)	Streptomyces_cinereorectus_strain_NBRC_15395_(NR_041173.1)	Streptomyces_crystallinus_strain_CSSP421_(NR_115376.1)	Streptomyces_crystallinus_strain_NBRC_15401_(NR_041177.1)	Streptomyces_cyaneofuscatus_strain_CSSP436_(NR_115383.1)	Streptomyces_cyaneofuscatus_strain_NBRC_13190_(NR_041226.1)	Streptomyces_cyaneus_strain_ISP_5108_(NR_114820.1)	Streptomyces_erumpens_strain_NBRC_15403_(NR_112455.1)	Streptomyces_fimicarius_strain_CSSP537_(NR_043351.1)	Streptomyces_fimicarius_strain_NBRC_13037_(NR_112347.1)	Streptomyces_flavofuscus_strain_NBRC_100768_(NR_112591.1)	Streptomyces_flavofuscus_strain_NRRL_B-2594_(NR_115965.1)	Streptomyces_flavogriseus_strain_CBS_101.34_(NR_028988.1)	Streptomyces_flavogriseus_strain_NBRC_13040_(NR_112348.1)	Streptomyces_flavovirens_strain_NBRC_12771_(NR_112269.1)	Streptomyces_flavovirens_strain_NBRC_3412_(NR_112508.1)	Streptomyces_flavovirens_strain_NBRC_3716_(NR_112509.1)	Streptomyces_floridae_strain_NBRC_15405_(NR_112456.1)	Streptomyces_floridae_strain_NRRL_2423_(NR_115457.1)	Streptomyces_fulvissimus_strain_DSM_40593_(NR_103947.1)	Streptomyces_fulvorobeus_strain_NBRC_15897_(NR_041196.1)	Streptomyces_globisporus_strain_KCTC_9026_(NR_118107.1)	Streptomyces_globisporus_strain_NBRC_12867_(NR_112309.1)	Streptomyces_griseinus_strain_NBRC_12869_(NR_112311.1)	Streptomyces_griseobrunneus_strain_CSSP424_(NR_115448.1)	Streptomyces_griseobrunneus_strain_NBRC_12775_(NR_112577.1)	Streptomyces_griseolus_strain_AS_4.1864_(NR_116631.1)	Streptomyces_griseolus_strain_CSSP403_(NR_115447.1)
Streptomyces_albolongus_strain_NBRC_13465_(NR_041144.1)	91	Prauserella_marina_strain_Ms498_(NR_104535.1)	Streptomyces_acrimycini_strain_CSSP430_(NR_115449.1)	Streptomyces_albovinaceus_strain_CSSP418_(NR_115373.1)	Streptomyces_alboviridis_strain_CSSP419_(NR_115374.1)	Streptomyces_alboviridis_strain_NBRC_13013_(NR_112340.1)	Streptomyces_anulatus_strain_NBRC_12755_(NR_041062.1)	Streptomyces_anulatus_strain_NBRC_13369_(NR_112527.1)	Streptomyces_anulatus_strain_NRRL_B-2000_(NR_043489.1)	Streptomyces_argenteolus_strain_JCM_4623_(NR_112120.1)	Streptomyces_argenteolus_strain_NBRC_12841_(NR_112300.1)	Streptomyces_baarnensis_strain_NBRC_14727_(NR_112440.1)	Streptomyces_baarnensis_strain_NRRL_B-1902_(NR_115964.1)	Streptomyces_bacillaris_strain_NBRC_13487_(NR_041146.1)	Streptomyces_badius_strain_CSSP536_(NR_043350.1)	Streptomyces_badius_strain_NBRC_12745_(NR_112256.1)	Streptomyces_californicus_strain_CSSP711_(NR_115432.1)	Streptomyces_californicus_strain_NBRC_12750_(NR_112257.1)	Streptomyces_californicus_strain_NBRC_3386_(NR_112486.1)	Streptomyces_caviscabies_strain_ATCC_51928_(NR_114493.1)	Streptomyces_cavourensis_strain_NBRC_13026_(NR_112345.1)	Streptomyces_cavourensis_strain_NRRL_2740_(NR_043851.1)	Streptomyces_cinereorectus_strain_NBRC_15395_(NR_041173.1)	Streptomyces_crystallinus_strain_CSSP421_(NR_115376.1)	Streptomyces_crystallinus_strain_NBRC_15401_(NR_041177.1)	Streptomyces_cyaneofuscatus_strain_CSSP436_(NR_115383.1)	Streptomyces_cyaneofuscatus_strain_NBRC_13190_(NR_041226.1)	Streptomyces_cyaneus_strain_ISP_5108_(NR_114820.1)	Streptomyces_erumpens_strain_NBRC_15403_(NR_112455.1)	Streptomyces_fimicarius_strain_CSSP537_(NR_043351.1)	Streptomyces_fimicarius_strain_NBRC_13037_(NR_112347.1)	Streptomyces_flavofuscus_strain_NBRC_100768_(NR_112591.1)	Streptomyces_flavofuscus_strain_NRRL_B-2594_(NR_115965.1)	Streptomyces_flavogriseus_strain_CBS_101.34_(NR_028988.1)	Streptomyces_flavogriseus_strain_NBRC_13040_(NR_112348.1)	Streptomyces_flavovirens_strain_NBRC_12771_(NR_112269.1)	Streptomyces_flavovirens_strain_NBRC_3412_(NR_112508.1)	Streptomyces_flavovirens_strain_NBRC_3716_(NR_112509.1)	Streptomyces_floridae_strain_NBRC_15405_(NR_112456.1)	Streptomyces_floridae_strain_NRRL_2423_(NR_115457.1)	Streptomyces_fulvissimus_strain_DSM_40593_(NR_103947.1)	Streptomyces_fulvorobeus_strain_NBRC_15897_(NR_041196.1)	Streptomyces_globisporus_strain_KCTC_9026_(NR_118107.1)	Streptomyces_globisporus_strain_NBRC_12867_(NR_112309.1)	Streptomyces_griseinus_strain_NBRC_12869_(NR_112311.1)	Streptomyces_griseobrunneus_strain_CSSP424_(NR_115448.1)	Streptomyces_griseobrunneus_strain_NBRC_12775_(NR_112577.1)	Streptomyces_griseolus_strain_AS_4.1864_(NR_116631.1)	Streptomyces_griseolus_strain_CSSP403_(NR_115447.1)
Streptomyces_albovinaceus_strain_CSSP418_(NR_115373.1)	91	Prauserella_marina_strain_Ms498_(NR_104535.1)	Streptomyces_acrimycini_strain_CSSP430_(NR_115449.1)	Streptomyces_albolongus_strain_NBRC_13465_(NR_041144.1)	Streptomyces_alboviridis_strain_CSSP419_(NR_115374.1)	Streptomyces_alboviridis_strain_NBRC_13013_(NR_112340.1)	Streptomyces_anulatus_strain_NBRC_12755_(NR_041062.1)	Streptomyces_anulatus_strain_NBRC_13369_(NR_112527.1)	Streptomyces_anulatus_strain_NRRL_B-2000_(NR_043489.1)	Streptomyces_argenteolus_strain_JCM_4623_(NR_112120.1)	Streptomyces_argenteolus_strain_NBRC_12841_(NR_112300.1)	Streptomyces_baarnensis_strain_NBRC_14727_(NR_112440.1)	Streptomyces_baarnensis_strain_NRRL_B-1902_(NR_115964.1)	Streptomyces_bacillaris_strain_NBRC_13487_(NR_041146.1)	Streptomyces_badius_strain_CSSP536_(NR_043350.1)	Streptomyces_badius_strain_NBRC_12745_(NR_112256.1)	Streptomyces_californicus_strain_CSSP711_(NR_115432.1)	Streptomyces_californicus_strain_NBRC_12750_(NR_112257.1)	Streptomyces_californicus_strain_NBRC_3386_(NR_112486.1)	Streptomyces_caviscabies_strain_ATCC_51928_(NR_114493.1)	Streptomyces_cavourensis_strain_NBRC_13026_(NR_112345.1)	Streptomyces_cavourensis_strain_NRRL_2740_(NR_043851.1)	Streptomyces_cinereorectus_strain_NBRC_15395_(NR_041173.1)	Streptomyces_crystallinus_strain_CSSP421_(NR_115376.1)	Streptomyces_crystallinus_strain_NBRC_15401_(NR_041177.1)	Streptomyces_cyaneofuscatus_strain_CSSP436_(NR_115383.1)	Streptomyces_cyaneofuscatus_strain_NBRC_13190_(NR_041226.1)	Streptomyces_cyaneus_strain_ISP_5108_(NR_114820.1)	Streptomyces_erumpens_strain_NBRC_15403_(NR_112455.1)	Streptomyces_fimicarius_strain_CSSP537_(NR_043351.1)	Streptomyces_fimicarius_strain_NBRC_13037_(NR_112347.1)	Streptomyces_flavofuscus_strain_NBRC_100768_(NR_112591.1)	Streptomyces_flavofuscus_strain_NRRL_B-2594_(NR_115965.1)	Streptomyces_flavogriseus_strain_CBS_101.34_(NR_028988.1)	Streptomyces_flavogriseus_strain_NBRC_13040_(NR_112348.1)	Streptomyces_flavovirens_strain_NBRC_12771_(NR_112269.1)	Streptomyces_flavovirens_strain_NBRC_3412_(NR_112508.1)	Streptomyces_flavovirens_strain_NBRC_3716_(NR_112509.1)	Streptomyces_floridae_strain_NBRC_15405_(NR_112456.1)	Streptomyces_floridae_strain_NRRL_2423_(NR_115457.1)	Streptomyces_fulvissimus_strain_DSM_40593_(NR_103947.1)	Streptomyces_fulvorobeus_strain_NBRC_15897_(NR_041196.1)	Streptomyces_globisporus_strain_KCTC_9026_(NR_118107.1)	Streptomyces_globisporus_strain_NBRC_12867_(NR_112309.1)	Streptomyces_griseinus_strain_NBRC_12869_(NR_112311.1)	Streptomyces_griseobrunneus_strain_CSSP424_(NR_115448.1)	Streptomyces_griseobrunneus_strain_NBRC_12775_(NR_112577.1)	Streptomyces_griseolus_strain_AS_4.1864_(NR_116631.1)	Streptomyces_griseolus_strain_CSSP403_(NR_115447.1)
Streptomyces_alboviridis_strain_CSSP419_(NR_115374.1)	91	Prauserella_marina_strain_Ms498_(NR_104535.1)	Streptomyces_acrimycini_strain_CSSP430_(NR_115449.1)	Streptomyces_albolongus_strain_NBRC_13465_(NR_041144.1)	Streptomyces_albovinaceus_strain_CSSP418_(NR_115373.1)	Streptomyces_alboviridis_strain_NBRC_13013_(NR_112340.1)	Streptomyces_anulatus_strain_NBRC_12755_(NR_041062.1)	Streptomyces_anulatus_strain_NBRC_13369_(NR_112527.1)	Streptomyces_anulatus_strain_NRRL_B-2000_(NR_043489.1)	Streptomyces_argenteolus_strain_JCM_4623_(NR_112120.1)	Streptomyces_argenteolus_strain_NBRC_12841_(NR_112300.1)	Streptomyces_baarnensis_strain_NBRC_14727_(NR_112440.1)	Streptomyces_baarnensis_strain_NRRL_B-1902_(NR_115964.1)	Streptomyces_bacillaris_strain_NBRC_13487_(NR_041146.1)	Streptomyces_badius_strain_CSSP536_(NR_043350.1)	Streptomyces_badius_strain_NBRC_12745_(NR_112256.1)	Streptomyces_californicus_strain_CSSP711_(NR_115432.1)	Streptomyces_californicus_strain_NBRC_12750_(NR_112257.1)	Streptomyces_californicus_strain_NBRC_3386_(NR_112486.1)	Streptomyces_caviscabies_strain_ATCC_51928_(NR_114493.1)	Streptomyces_cavourensis_strain_NBRC_13026_(NR_112345.1)	Streptomyces_cavourensis_strain_NRRL_2740_(NR_043851.1)	Streptomyces_cinereorectus_strain_NBRC_15395_(NR_041173.1)	Streptomyces_crystallinus_strain_CSSP421_(NR_115376.1)	Streptomyces_crystallinus_strain_NBRC_15401_(NR_041177.1)	Streptomyces_cyaneofuscatus_strain_CSSP436_(NR_115383.1)	Streptomyces_cyaneofuscatus_strain_NBRC_13190_(NR_041226.1)	Streptomyces_cyaneus_strain_ISP_5108_(NR_114820.1)	Streptomyces_erumpens_strain_NBRC_15403_(NR_112455.1)	Streptomyces_fimicarius_strain_CSSP537_(NR_043351.1)	Streptomyces_fimicarius_strain_NBRC_13037_(NR_112347.1)	Streptomyces_flavofuscus_strain_NBRC_100768_(NR_112591.1)	Streptomyces_flavofuscus_strain_NRRL_B-2594_(NR_115965.1)	Streptomyces_flavogriseus_strain_CBS_101.34_(NR_028988.1)	Streptomyces_flavogriseus_strain_NBRC_13040_(NR_112348.1)	Streptomyces_flavovirens_strain_NBRC_12771_(NR_112269.1)	Streptomyces_flavovirens_strain_NBRC_3412_(NR_112508.1)	Streptomyces_flavovirens_strain_NBRC_3716_(NR_112509.1)	Streptomyces_floridae_strain_NBRC_15405_(NR_112456.1)	Streptomyces_floridae_strain_NRRL_2423_(NR_115457.1)	Streptomyces_fulvissimus_strain_DSM_40593_(NR_103947.1)	Streptomyces_fulvorobeus_strain_NBRC_15897_(NR_041196.1)	Streptomyces_globisporus_strain_KCTC_9026_(NR_118107.1)	Streptomyces_globisporus_strain_NBRC_12867_(NR_112309.1)	Streptomyces_griseinus_strain_NBRC_12869_(NR_112311.1)	Streptomyces_griseobrunneus_strain_CSSP424_(NR_115448.1)	Streptomyces_griseobrunneus_strain_NBRC_12775_(NR_112577.1)	Streptomyces_griseolus_strain_AS_4.1864_(NR_116631.1)	Streptomyces_griseolus_strain_CSSP403_(NR_115447.1)
Streptomyces_alboviridis_strain_NBRC_13013_(NR_112340.1)	91	Prauserella_marina_strain_Ms498_(NR_104535.1)	Streptomyces_acrimycini_strain_CSSP430_(NR_115449.1)	Streptomyces_albolongus_strain_NBRC_13465_(NR_041144.1)	Streptomyces_albovinaceus_strain_CSSP418_(NR_115373.1)	Streptomyces_alboviridis_strain_CSSP419_(NR_115374.1)	Streptomyces_anulatus_strain_NBRC_12755_(NR_041062.1)	Streptomyces_anulatus_strain_NBRC_13369_(NR_112527.1)	Streptomyces_anulatus_strain_NRRL_B-2000_(NR_043489.1)	Streptomyces_argenteolus_strain_JCM_4623_(NR_112120.1)	Streptomyces_argenteolus_strain_NBRC_12841_(NR_112300.1)	Streptomyces_baarnensis_strain_NBRC_14727_(NR_112440.1)	Streptomyces_baarnensis_strain_NRRL_B-1902_(NR_115964.1)	Streptomyces_bacillaris_strain_NBRC_13487_(NR_041146.1)	Streptomyces_badius_strain_CSSP536_(NR_043350.1)	Streptomyces_badius_strain_NBRC_12745_(NR_112256.1)	Streptomyces_californicus_strain_CSSP711_(NR_115432.1)	Streptomyces_californicus_strain_NBRC_12750_(NR_112257.1)	Streptomyces_californicus_strain_NBRC_3386_(NR_112486.1)	Streptomyces_caviscabies_strain_ATCC_51928_(NR_114493.1)	Streptomyces_cavourensis_strain_NBRC_13026_(NR_112345.1)	Streptomyces_cavourensis_strain_NRRL_2740_(NR_043851.1)	Streptomyces_cinereorectus_strain_NBRC_15395_(NR_041173.1)	Streptomyces_crystallinus_strain_CSSP421_(NR_115376.1)	Streptomyces_crystallinus_strain_NBRC_15401_(NR_041177.1)	Streptomyces_cyaneofuscatus_strain_CSSP436_(NR_115383.1)	Streptomyces_cyaneofuscatus_strain_NBRC_13190_(NR_041226.1)	Streptomyces_cyaneus_strain_ISP_5108_(NR_114820.1)	Streptomyces_erumpens_strain_NBRC_15403_(NR_112455.1)	Streptomyces_fimicarius_strain_CSSP537_(NR_043351.1)	Streptomyces_fimicarius_strain_NBRC_13037_(NR_112347.1)	Streptomyces_flavofuscus_strain_NBRC_100768_(NR_112591.1)	Streptomyces_flavofuscus_strain_NRRL_B-2594_(NR_115965.1)	Streptomyces_flavogriseus_strain_CBS_101.34_(NR_028988.1)	Streptomyces_flavogriseus_strain_NBRC_13040_(NR_112348.1)	Streptomyces_flavovirens_strain_NBRC_12771_(NR_112269.1)	Streptomyces_flavovirens_strain_NBRC_3412_(NR_112508.1)	Streptomyces_flavovirens_strain_NBRC_3716_(NR_112509.1)	Streptomyces_floridae_strain_NBRC_15405_(NR_112456.1)	Streptomyces_floridae_strain_NRRL_2423_(NR_115457.1)	Streptomyces_fulvissimus_strain_DSM_40593_(NR_103947.1)	Streptomyces_fulvorobeus_strain_NBRC_15897_(NR_041196.1)	Streptomyces_globisporus_strain_KCTC_9026_(NR_118107.1)	Streptomyces_globisporus_strain_NBRC_12867_(NR_112309.1)	Streptomyces_griseinus_strain_NBRC_12869_(NR_112311.1)	Streptomyces_griseobrunneus_strain_CSSP424_(NR_115448.1)	Streptomyces_griseobrunneus_strain_NBRC_12775_(NR_112577.1)	Streptomyces_griseolus_strain_AS_4.1864_(NR_116631.1)	Streptomyces_griseolus_strain_CSSP403_(NR_115447.1)
Streptomyces_anulatus_strain_NBRC_12755_(NR_041062.1)	91	Prauserella_marina_strain_Ms498_(NR_104535.1)	Streptomyces_acrimycini_strain_CSSP430_(NR_115449.1)	Streptomyces_albolongus_strain_NBRC_13465_(NR_041144.1)	Streptomyces_albovinaceus_strain_CSSP418_(NR_115373.1)	Streptomyces_alboviridis_strain_CSSP419_(NR_115374.1)	Streptomyces_alboviridis_strain_NBRC_13013_(NR_112340.1)	Streptomyces_anulatus_strain_NBRC_13369_(NR_112527.1)	Streptomyces_anulatus_strain_NRRL_B-2000_(NR_043489.1)	Streptomyces_argenteolus_strain_JCM_4623_(NR_112120.1)	Streptomyces_argenteolus_strain_NBRC_12841_(NR_112300.1)	Streptomyces_baarnensis_strain_NBRC_14727_(NR_112440.1)	Streptomyces_baarnensis_strain_NRRL_B-1902_(NR_115964.1)	Streptomyces_bacillaris_strain_NBRC_13487_(NR_041146.1)	Streptomyces_badius_strain_CSSP536_(NR_043350.1)	Streptomyces_badius_strain_NBRC_12745_(NR_112256.1)	Streptomyces_californicus_strain_CSSP711_(NR_115432.1)	Streptomyces_californicus_strain_NBRC_12750_(NR_112257.1)	Streptomyces_californicus_strain_NBRC_3386_(NR_112486.1)	Streptomyces_caviscabies_strain_ATCC_51928_(NR_114493.1)	Streptomyces_cavourensis_strain_NBRC_13026_(NR_112345.1)	Streptomyces_cavourensis_strain_NRRL_2740_(NR_043851.1)	Streptomyces_cinereorectus_strain_NBRC_15395_(NR_041173.1)	Streptomyces_crystallinus_strain_CSSP421_(NR_115376.1)	Streptomyces_crystallinus_strain_NBRC_15401_(NR_041177.1)	Streptomyces_cyaneofuscatus_strain_CSSP436_(NR_115383.1)	Streptomyces_cyaneofuscatus_strain_NBRC_13190_(NR_041226.1)	Streptomyces_cyaneus_strain_ISP_5108_(NR_114820.1)	Streptomyces_erumpens_strain_NBRC_15403_(NR_112455.1)	Streptomyces_fimicarius_strain_CSSP537_(NR_043351.1)	Streptomyces_fimicarius_strain_NBRC_13037_(NR_112347.1)	Streptomyces_flavofuscus_strain_NBRC_100768_(NR_112591.1)	Streptomyces_flavofuscus_strain_NRRL_B-2594_(NR_115965.1)	Streptomyces_flavogriseus_strain_CBS_101.34_(NR_028988.1)	Streptomyces_flavogriseus_strain_NBRC_13040_(NR_112348.1)	Streptomyces_flavovirens_strain_NBRC_12771_(NR_112269.1)	Streptomyces_flavovirens_strain_NBRC_3412_(NR_112508.1)	Streptomyces_flavovirens_strain_NBRC_3716_(NR_112509.1)	Streptomyces_floridae_strain_NBRC_15405_(NR_112456.1)	Streptomyces_floridae_strain_NRRL_2423_(NR_115457.1)	Streptomyces_fulvissimus_strain_DSM_40593_(NR_103947.1)	Streptomyces_fulvorobeus_strain_NBRC_15897_(NR_041196.1)	Streptomyces_globisporus_strain_KCTC_9026_(NR_118107.1)	Streptomyces_globisporus_strain_NBRC_12867_(NR_112309.1)	Streptomyces_griseinus_strain_NBRC_12869_(NR_112311.1)	Streptomyces_griseobrunneus_strain_CSSP424_(NR_115448.1)	Streptomyces_griseobrunneus_strain_NBRC_12775_(NR_112577.1)	Streptomyces_griseolus_strain_AS_4.1864_(NR_116631.1)	Streptomyces_griseolus_strain_CSSP403_(NR_115447.1)
Streptomyces_anulatus_strain_NBRC_13369_(NR_112527.1)	91	Prauserella_marina_strain_Ms498_(NR_104535.1)	Streptomyces_acrimycini_strain_CSSP430_(NR_115449.1)	Streptomyces_albolongus_strain_NBRC_13465_(NR_041144.1)	Streptomyces_albovinaceus_strain_CSSP418_(NR_115373.1)	Streptomyces_alboviridis_strain_CSSP419_(NR_115374.1)	Streptomyces_alboviridis_strain_NBRC_13013_(NR_112340.1)	Streptomyces_anulatus_strain_NBRC_12755_(NR_041062.1)	Streptomyces_anulatus_strain_NRRL_B-2000_(NR_043489.1)	Streptomyces_argenteolus_strain_JCM_4623_(NR_112120.1)	Streptomyces_argenteolus_strain_NBRC_12841_(NR_112300.1)	Streptomyces_baarnensis_strain_NBRC_14727_(NR_112440.1)	Streptomyces_baarnensis_strain_NRRL_B-1902_(NR_115964.1)	Streptomyces_bacillaris_strain_NBRC_13487_(NR_041146.1)	Streptomyces_badius_strain_CSSP536_(NR_043350.1)	Streptomyces_badius_strain_NBRC_12745_(NR_112256.1)	Streptomyces_californicus_strain_CSSP711_(NR_115432.1)	Streptomyces_californicus_strain_NBRC_12750_(NR_112257.1)	Streptomyces_californicus_strain_NBRC_3386_(NR_112486.1)	Streptomyces_caviscabies_strain_ATCC_51928_(NR_114493.1)	Streptomyces_cavourensis_strain_NBRC_13026_(NR_112345.1)	Streptomyces_cavourensis_strain_NRRL_2740_(NR_043851.1)	Streptomyces_cinereorectus_strain_NBRC_15395_(NR_041173.1)	Streptomyces_crystallinus_strain_CSSP421_(NR_115376.1)	Streptomyces_crystallinus_strain_NBRC_15401_(NR_041177.1)	Streptomyces_cyaneofuscatus_strain_CSSP436_(NR_115383.1)	Streptomyces_cyaneofuscatus_strain_NBRC_13190_(NR_041226.1)	Streptomyces_cyaneus_strain_ISP_5108_(NR_114820.1)	Streptomyces_erumpens_strain_NBRC_15403_(NR_112455.1)	Streptomyces_fimicarius_strain_CSSP537_(NR_043351.1)	Streptomyces_fimicarius_strain_NBRC_13037_(NR_112347.1)	Streptomyces_flavofuscus_strain_NBRC_100768_(NR_112591.1)	Streptomyces_flavofuscus_strain_NRRL_B-2594_(NR_115965.1)	Streptomyces_flavogriseus_strain_CBS_101.34_(NR_028988.1)	Streptomyces_flavogriseus_strain_NBRC_13040_(NR_112348.1)	Streptomyces_flavovirens_strain_NBRC_12771_(NR_112269.1)	Streptomyces_flavovirens_strain_NBRC_3412_(NR_112508.1)	Streptomyces_flavovirens_strain_NBRC_3716_(NR_112509.1)	Streptomyces_floridae_strain_NBRC_15405_(NR_112456.1)	Streptomyces_floridae_strain_NRRL_2423_(NR_115457.1)	Streptomyces_fulvissimus_strain_DSM_40593_(NR_103947.1)	Streptomyces_fulvorobeus_strain_NBRC_15897_(NR_041196.1)	Streptomyces_globisporus_strain_KCTC_9026_(NR_118107.1)	Streptomyces_globisporus_strain_NBRC_12867_(NR_112309.1)	Streptomyces_griseinus_strain_NBRC_12869_(NR_112311.1)	Streptomyces_griseobrunneus_strain_CSSP424_(NR_115448.1)	Streptomyces_griseobrunneus_strain_NBRC_12775_(NR_112577.1)	Streptomyces_griseolus_strain_AS_4.1864_(NR_116631.1)	Streptomyces_griseolus_strain_CSSP403_(NR_115447.1)
Streptomyces_anulatus_strain_NRRL_B-2000_(NR_043489.1)	91	Prauserella_marina_strain_Ms498_(NR_104535.1)	Streptomyces_acrimycini_strain_CSSP430_(NR_115449.1)	Streptomyces_albolongus_strain_NBRC_13465_(NR_041144.1)	Streptomyces_albovinaceus_strain_CSSP418_(NR_115373.1)	Streptomyces_alboviridis_strain_CSSP419_(NR_115374.1)	Streptomyces_alboviridis_strain_NBRC_13013_(NR_112340.1)	Streptomyces_anulatus_strain_NBRC_12755_(NR_041062.1)	Streptomyces_anulatus_strain_NBRC_13369_(NR_112527.1)	Streptomyces_argenteolus_strain_JCM_4623_(NR_112120.1)	Streptomyces_argenteolus_strain_NBRC_12841_(NR_112300.1)	Streptomyces_baarnensis_strain_NBRC_14727_(NR_112440.1)	Streptomyces_baarnensis_strain_NRRL_B-1902_(NR_115964.1)	Streptomyces_bacillaris_strain_NBRC_13487_(NR_041146.1)	Streptomyces_badius_strain_CSSP536_(NR_043350.1)	Streptomyces_badius_strain_NBRC_12745_(NR_112256.1)	Streptomyces_californicus_strain_CSSP711_(NR_115432.1)	Streptomyces_californicus_strain_NBRC_12750_(NR_112257.1)	Streptomyces_californicus_strain_NBRC_3386_(NR_112486.1)	Streptomyces_caviscabies_strain_ATCC_51928_(NR_114493.1)	Streptomyces_cavourensis_strain_NBRC_13026_(NR_112345.1)	Streptomyces_cavourensis_strain_NRRL_2740_(NR_043851.1)	Streptomyces_cinereorectus_strain_NBRC_15395_(NR_041173.1)	Streptomyces_crystallinus_strain_CSSP421_(NR_115376.1)	Streptomyces_crystallinus_strain_NBRC_15401_(NR_041177.1)	Streptomyces_cyaneofuscatus_strain_CSSP436_(NR_115383.1)	Streptomyces_cyaneofuscatus_strain_NBRC_13190_(NR_041226.1)	Streptomyces_cyaneus_strain_ISP_5108_(NR_114820.1)	Streptomyces_erumpens_strain_NBRC_15403_(NR_112455.1)	Streptomyces_fimicarius_strain_CSSP537_(NR_043351.1)	Streptomyces_fimicarius_strain_NBRC_13037_(NR_112347.1)	Streptomyces_flavofuscus_strain_NBRC_100768_(NR_112591.1)	Streptomyces_flavofuscus_strain_NRRL_B-2594_(NR_115965.1)	Streptomyces_flavogriseus_strain_CBS_101.34_(NR_028988.1)	Streptomyces_flavogriseus_strain_NBRC_13040_(NR_112348.1)	Streptomyces_flavovirens_strain_NBRC_12771_(NR_112269.1)	Streptomyces_flavovirens_strain_NBRC_3412_(NR_112508.1)	Streptomyces_flavovirens_strain_NBRC_3716_(NR_112509.1)	Streptomyces_floridae_strain_NBRC_15405_(NR_112456.1)	Streptomyces_floridae_strain_NRRL_2423_(NR_115457.1)	Streptomyces_fulvissimus_strain_DSM_40593_(NR_103947.1)	Streptomyces_fulvorobeus_strain_NBRC_15897_(NR_041196.1)	Streptomyces_globisporus_strain_KCTC_9026_(NR_118107.1)	Streptomyces_globisporus_strain_NBRC_12867_(NR_112309.1)	Streptomyces_griseinus_strain_NBRC_12869_(NR_112311.1)	Streptomyces_griseobrunneus_strain_CSSP424_(NR_115448.1)	Streptomyces_griseobrunneus_strain_NBRC_12775_(NR_112577.1)	Streptomyces_griseolus_strain_AS_4.1864_(NR_116631.1)	Streptomyces_griseolus_strain_CSSP403_(NR_115447.1)
Streptomyces_argenteolus_strain_JCM_4623_(NR_112120.1)	91	Prauserella_marina_strain_Ms498_(NR_104535.1)	Streptomyces_acrimycini_strain_CSSP430_(NR_115449.1)	Streptomyces_albolongus_strain_NBRC_13465_(NR_041144.1)	Streptomyces_albovinaceus_strain_CSSP418_(NR_115373.1)	Streptomyces_alboviridis_strain_CSSP419_(NR_115374.1)	Streptomyces_alboviridis_strain_NBRC_13013_(NR_112340.1)	Streptomyces_anulatus_strain_NBRC_12755_(NR_041062.1)	Streptomyces_anulatus_strain_NBRC_13369_(NR_112527.1)	Streptomyces_anulatus_strain_NRRL_B-2000_(NR_043489.1)	Streptomyces_argenteolus_strain_NBRC_12841_(NR_112300.1)	Streptomyces_baarnensis_strain_NBRC_14727_(NR_112440.1)	Streptomyces_baarnensis_strain_NRRL_B-1902_(NR_115964.1)	Streptomyces_bacillaris_strain_NBRC_13487_(NR_041146.1)	Streptomyces_badius_strain_CSSP536_(NR_043350.1)	Streptomyces_badius_strain_NBRC_12745_(NR_112256.1)	Streptomyces_californicus_strain_CSSP711_(NR_115432.1)	Streptomyces_californicus_strain_NBRC_12750_(NR_112257.1)	Streptomyces_californicus_strain_NBRC_3386_(NR_112486.1)	Streptomyces_caviscabies_strain_ATCC_51928_(NR_114493.1)	Streptomyces_cavourensis_strain_NBRC_13026_(NR_112345.1)	Streptomyces_cavourensis_strain_NRRL_2740_(NR_043851.1)	Streptomyces_cinereorectus_strain_NBRC_15395_(NR_041173.1)	Streptomyces_crystallinus_strain_CSSP421_(NR_115376.1)	Streptomyces_crystallinus_strain_NBRC_15401_(NR_041177.1)	Streptomyces_cyaneofuscatus_strain_CSSP436_(NR_115383.1)	Streptomyces_cyaneofuscatus_strain_NBRC_13190_(NR_041226.1)	Streptomyces_cyaneus_strain_ISP_5108_(NR_114820.1)	Streptomyces_erumpens_strain_NBRC_15403_(NR_112455.1)	Streptomyces_fimicarius_strain_CSSP537_(NR_043351.1)	Streptomyces_fimicarius_strain_NBRC_13037_(NR_112347.1)	Streptomyces_flavofuscus_strain_NBRC_100768_(NR_112591.1)	Streptomyces_flavofuscus_strain_NRRL_B-2594_(NR_115965.1)	Streptomyces_flavogriseus_strain_CBS_101.34_(NR_028988.1)	Streptomyces_flavogriseus_strain_NBRC_13040_(NR_112348.1)	Streptomyces_flavovirens_strain_NBRC_12771_(NR_112269.1)	Streptomyces_flavovirens_strain_NBRC_3412_(NR_112508.1)	Streptomyces_flavovirens_strain_NBRC_3716_(NR_112509.1)	Streptomyces_floridae_strain_NBRC_15405_(NR_112456.1)	Streptomyces_floridae_strain_NRRL_2423_(NR_115457.1)	Streptomyces_fulvissimus_strain_DSM_40593_(NR_103947.1)	Streptomyces_fulvorobeus_strain_NBRC_15897_(NR_041196.1)	Streptomyces_globisporus_strain_KCTC_9026_(NR_118107.1)	Streptomyces_globisporus_strain_NBRC_12867_(NR_112309.1)	Streptomyces_griseinus_strain_NBRC_12869_(NR_112311.1)	Streptomyces_griseobrunneus_strain_CSSP424_(NR_115448.1)	Streptomyces_griseobrunneus_strain_NBRC_12775_(NR_112577.1)	Streptomyces_griseolus_strain_AS_4.1864_(NR_116631.1)	Streptomyces_griseolus_strain_CSSP403_(NR_115447.1)
Streptomyces_argenteolus_strain_NBRC_12841_(NR_112300.1)	91	Prauserella_marina_strain_Ms498_(NR_104535.1)	Streptomyces_acrimycini_strain_CSSP430_(NR_115449.1)	Streptomyces_albolongus_strain_NBRC_13465_(NR_041144.1)	Streptomyces_albovinaceus_strain_CSSP418_(NR_115373.1)	Streptomyces_alboviridis_strain_CSSP419_(NR_115374.1)	Streptomyces_alboviridis_strain_NBRC_13013_(NR_112340.1)	Streptomyces_anulatus_strain_NBRC_12755_(NR_041062.1)	Streptomyces_anulatus_strain_NBRC_13369_(NR_112527.1)	Streptomyces_anulatus_strain_NRRL_B-2000_(NR_043489.1)	Streptomyces_argenteolus_strain_JCM_4623_(NR_112120.1)	Streptomyces_baarnensis_strain_NBRC_14727_(NR_112440.1)	Streptomyces_baarnensis_strain_NRRL_B-1902_(NR_115964.1)	Streptomyces_bacillaris_strain_NBRC_13487_(NR_041146.1)	Streptomyces_badius_strain_CSSP536_(NR_043350.1)	Streptomyces_badius_strain_NBRC_12745_(NR_112256.1)	Streptomyces_californicus_strain_CSSP711_(NR_115432.1)	Streptomyces_californicus_strain_NBRC_12750_(NR_112257.1)	Streptomyces_californicus_strain_NBRC_3386_(NR_112486.1)	Streptomyces_caviscabies_strain_ATCC_51928_(NR_114493.1)	Streptomyces_cavourensis_strain_NBRC_13026_(NR_112345.1)	Streptomyces_cavourensis_strain_NRRL_2740_(NR_043851.1)	Streptomyces_cinereorectus_strain_NBRC_15395_(NR_041173.1)	Streptomyces_crystallinus_strain_CSSP421_(NR_115376.1)	Streptomyces_crystallinus_strain_NBRC_15401_(NR_041177.1)	Streptomyces_cyaneofuscatus_strain_CSSP436_(NR_115383.1)	Streptomyces_cyaneofuscatus_strain_NBRC_13190_(NR_041226.1)	Streptomyces_cyaneus_strain_ISP_5108_(NR_114820.1)	Streptomyces_erumpens_strain_NBRC_15403_(NR_112455.1)	Streptomyces_fimicarius_strain_CSSP537_(NR_043351.1)	Streptomyces_fimicarius_strain_NBRC_13037_(NR_112347.1)	Streptomyces_flavofuscus_strain_NBRC_100768_(NR_112591.1)	Streptomyces_flavofuscus_strain_NRRL_B-2594_(NR_115965.1)	Streptomyces_flavogriseus_strain_CBS_101.34_(NR_028988.1)	Streptomyces_flavogriseus_strain_NBRC_13040_(NR_112348.1)	Streptomyces_flavovirens_strain_NBRC_12771_(NR_112269.1)	Streptomyces_flavovirens_strain_NBRC_3412_(NR_112508.1)	Streptomyces_flavovirens_strain_NBRC_3716_(NR_112509.1)	Streptomyces_floridae_strain_NBRC_15405_(NR_112456.1)	Streptomyces_floridae_strain_NRRL_2423_(NR_115457.1)	Streptomyces_fulvissimus_strain_DSM_40593_(NR_103947.1)	Streptomyces_fulvorobeus_strain_NBRC_15897_(NR_041196.1)	Streptomyces_globisporus_strain_KCTC_9026_(NR_118107.1)	Streptomyces_globisporus_strain_NBRC_12867_(NR_112309.1)	Streptomyces_griseinus_strain_NBRC_12869_(NR_112311.1)	Streptomyces_griseobrunneus_strain_CSSP424_(NR_115448.1)	Streptomyces_griseobrunneus_strain_NBRC_12775_(NR_112577.1)	Streptomyces_griseolus_strain_AS_4.1864_(NR_116631.1)	Streptomyces_griseolus_strain_CSSP403_(NR_115447.1)
Streptomyces_baarnensis_strain_NBRC_14727_(NR_112440.1)	91	Prauserella_marina_strain_Ms498_(NR_104535.1)	Streptomyces_acrimycini_strain_CSSP430_(NR_115449.1)	Streptomyces_albolongus_strain_NBRC_13465_(NR_041144.1)	Streptomyces_albovinaceus_strain_CSSP418_(NR_115373.1)	Streptomyces_alboviridis_strain_CSSP419_(NR_115374.1)	Streptomyces_alboviridis_strain_NBRC_13013_(NR_112340.1)	Streptomyces_anulatus_strain_NBRC_12755_(NR_041062.1)	Streptomyces_anulatus_strain_NBRC_13369_(NR_112527.1)	Streptomyces_anulatus_strain_NRRL_B-2000_(NR_043489.1)	Streptomyces_argenteolus_strain_JCM_4623_(NR_112120.1)	Streptomyces_argenteolus_strain_NBRC_12841_(NR_112300.1)	Streptomyces_baarnensis_strain_NRRL_B-1902_(NR_115964.1)	Streptomyces_bacillaris_strain_NBRC_13487_(NR_041146.1)	Streptomyces_badius_strain_CSSP536_(NR_043350.1)	Streptomyces_badius_strain_NBRC_12745_(NR_112256.1)	Streptomyces_californicus_strain_CSSP711_(NR_115432.1)	Streptomyces_californicus_strain_NBRC_12750_(NR_112257.1)	Streptomyces_californicus_strain_NBRC_3386_(NR_112486.1)	Streptomyces_caviscabies_strain_ATCC_51928_(NR_114493.1)	Streptomyces_cavourensis_strain_NBRC_13026_(NR_112345.1)	Streptomyces_cavourensis_strain_NRRL_2740_(NR_043851.1)	Streptomyces_cinereorectus_strain_NBRC_15395_(NR_041173.1)	Streptomyces_crystallinus_strain_CSSP421_(NR_115376.1)	Streptomyces_crystallinus_strain_NBRC_15401_(NR_041177.1)	Streptomyces_cyaneofuscatus_strain_CSSP436_(NR_115383.1)	Streptomyces_cyaneofuscatus_strain_NBRC_13190_(NR_041226.1)	Streptomyces_cyaneus_strain_ISP_5108_(NR_114820.1)	Streptomyces_erumpens_strain_NBRC_15403_(NR_112455.1)	Streptomyces_fimicarius_strain_CSSP537_(NR_043351.1)	Streptomyces_fimicarius_strain_NBRC_13037_(NR_112347.1)	Streptomyces_flavofuscus_strain_NBRC_100768_(NR_112591.1)	Streptomyces_flavofuscus_strain_NRRL_B-2594_(NR_115965.1)	Streptomyces_flavogriseus_strain_CBS_101.34_(NR_028988.1)	Streptomyces_flavogriseus_strain_NBRC_13040_(NR_112348.1)	Streptomyces_flavovirens_strain_NBRC_12771_(NR_112269.1)	Streptomyces_flavovirens_strain_NBRC_3412_(NR_112508.1)	Streptomyces_flavovirens_strain_NBRC_3716_(NR_112509.1)	Streptomyces_floridae_strain_NBRC_15405_(NR_112456.1)	Streptomyces_floridae_strain_NRRL_2423_(NR_115457.1)	Streptomyces_fulvissimus_strain_DSM_40593_(NR_103947.1)	Streptomyces_fulvorobeus_strain_NBRC_15897_(NR_041196.1)	Streptomyces_globisporus_strain_KCTC_9026_(NR_118107.1)	Streptomyces_globisporus_strain_NBRC_12867_(NR_112309.1)	Streptomyces_griseinus_strain_NBRC_12869_(NR_112311.1)	Streptomyces_griseobrunneus_strain_CSSP424_(NR_115448.1)	Streptomyces_griseobrunneus_strain_NBRC_12775_(NR_112577.1)	Streptomyces_griseolus_strain_AS_4.1864_(NR_116631.1)	Streptomyces_griseolus_strain_CSSP403_(NR_115447.1)
[truncated: 92 more rows]
[truncated: 42 more columns]

## Sheet: Kelpie uc
usearch_global to RefSeq									Species (USG)		Species (USG)	3239		3239			new .uc files go here first									Species (USG)		Species (USG)	3239
H	2539	253	100	+	0	0	425I253M713I	R4	Rhodobacter_viridis_strain_JA737_(NR_108854.1)		Acidovorax_anthurii_(NR_041947.1)	3	98.9333	3	#REF!		H	2539	253	100	+	0	0	425I253M713I	R4	Rhodobacter_viridis_strain_JA737_(NR_108854.1)		Rhodobacter_viridis_strain_JA737_(NR_108854.1)	54	54
[truncated: 3,238 more rows]

## Sheet: Kelpie synonyms
Acidovorax_anthurii_(NR_041947.1)	Acidovorax_facilis_strain_LMG_2193_(NR_116132.1)	Acidovorax_radicis_strain_N35_(NR_117776.1)	Limnohabitans_parvus_strain_II-B4_(NR_125542.1)	Variovorax_boronicumulans_strain_BAM-48_(NR_041588.1)	Variovorax_boronicumulans_strain_NBRC_103145_(NR_114214.1)	Variovorax_ginsengisoli_strain_Gsoil_3165_(NR_112562.1)
[truncated: 302 more rows]
[truncated: 42 more columns]

[truncated: 4 more sheets: Kelpie Identity, Comparisons, Comparisons present by ab., Lineages]
